# Supplementary material for: AI Designed, Mutation Resistant Broad Neutralizing Antibodies Against Multiple SARS-CoV-2 Strains
Source: Research Square preprint supplement (doi:10.21203/rs.3.rs-5184292/v1), 2025-03-27
Supplement: Supplementary file 1 [file Ainnocence ABs (1&2) for DELTA_PLATING 012022.xlsx]

## Sheet: PLATING_1 & 2
	Antibody ID	AntibodyID	Set	Virus	High Conc*	Vol. (ul)	Plate ID	Wells	*mg/ml					Object Id	Object Batch Ref	Supplier Object Id	Supplier Batch
	AIN1-3, AINNL0003	AIN1-3_AINNL0003	Ainnocence Set 1	DELTA	1.05	45	AINNDILN1	A03-A22					ok	AB01974163	01	AIN1-3_AINNL0003	Lot# MB15NO4103
	AIN1-5, AINNL0005	AIN1-5_AINNL0005	Ainnocence Set 1	DELTA	1.06	45	AINNDILN1	B03-B22					ok	AB01974164	01	AIN1-5_AINNL0005	Lot# MB15NO4105
	AIN1-6, AINNL0006	AIN1-6_AINNL0006	Ainnocence Set 1	DELTA	1.06	45	AINNDILN1	C03-C22					ok	AB01974165	01	AIN1-6_AINNL0006	Lot# MB15NO4106
	AIN1-7, AINNL0007	AIN1-7_AINNL0007	Ainnocence Set 1	DELTA	1.06	45	AINNDILN1	D03-D22					ok	AB01974166	01	AIN1-7_AINNL0007	Lot# MB15NO4107
	AIN1-8, AINNL0008	AIN1-8_AINNL0008	Ainnocence Set 1	DELTA	1.06	45	AINNDILN1	E03-E22					ok	AB01974167	01	AIN1-8_AINNL0008	Lot# MB15NO4108
	AIN1-9, AINNL0009	AIN1-9_AINNL0009	Ainnocence Set 1	DELTA	1.11	45	AINNDILN1	F03-F22					ok	AB01974168	01	AIN1-9_AINNL0009	Lot# MB15NO4109
	AIN1-10, AINNL0010	AIN1-10_AINNL0010	Ainnocence Set 1	DELTA	1.05	45	AINNDILN1	G03-G22					ok	AB01974169	01	AIN1-10_AINNL0010	Lot# MB15NO4110
	AIN1-18, AINNL0018	AIN1-18_AINNL0018	Ainnocence Set 1	DELTA	1.01	45	AINNDILN1	H03-H22					ok	AB01974170	01	AIN1-18_AINNL0018	Lot# MB15NO4118
	AIN1-21, AINNL0021	AIN1-21_AINNL0021	Ainnocence Set 1	DELTA	0.99	45	AINNDILN1	I03-I22					ok	AB01974171	01	AIN1-21_AINNL0021	Lot# MB15NO4121
	AIN1-22, AINNL0022	AIN1-22_AINNL0022	Ainnocence Set 1	DELTA	0.92	45	AINNDILN1	J03-J22					ok	AB01974172	01	AIN1-22_AINNL0022	Lot# MB15NO4122
	AIN1-26, AINNL0026	AIN1-26_AINNL0026	Ainnocence Set 1	DELTA	0.98	45	AINNDILN1	K03-K22					ok	AB01974173	01	AIN1-26_AINNL0026	Lot# MB15NO4126
	AIN1-28, AINNL0028	AIN1-28_AINNL0028	Ainnocence Set 1	DELTA	0.87	45	AINNDILN1	L03-L22					ok	AB01974174	01	AIN1-28_AINNL0028	Lot# MB15NO4128
	AIN1-29, AINNL0029	AIN1-29_AINNL0029	Ainnocence Set 1	DELTA	0.9	45	AINNDILN1	M03-M22					ok	AB01974175	01	AIN1-29_AINNL0029	Lot# MB15NO4129
	AIN1-30, AINNL0030	AIN1-30_AINNL0030	Ainnocence Set 1	DELTA	0.78	45	AINNDILN1	N03-N22					ok	AB01974176	01	AIN1-30_AINNL0030	Lot# MB15NO4130
	AIN1-31, AINNL0031	AIN1-31_AINNL0031	Ainnocence Set 1	DELTA	0.88	45	AINNDILN1	O03-O22					ok	AB01974177	01	AIN1-31_AINNL0031	Lot# MB15NO4131
	AIN1-32, AINNL0032	AIN1-32_AINNL0032	Ainnocence Set 1	DELTA	0.92	45	AINNDILN1	P03-P22	plated 01/24/22				ok	AB01974178	01	AIN1-32_AINNL0032	Lot# MB15NO4132
	AIN1-33, AINNL0033	AIN1-33_AINNL0033	Ainnocence Set 1	DELTA	0.96	45	AINNDILN2	A03-A22					ok	AB01974179	01	AIN1-33_AINNL0033	Lot# MB15NO4133
	AIN1-36, AINNL0036	AIN1-36_AINNL0036	Ainnocence Set 1	DELTA	0.85	45	AINNDILN2	B03-B22					ok	AB01974180	01	AIN1-36_AINNL0036	Lot# MB15NO4136
	AIN1-1, AINNL0001	AIN1-1_AINNL0001	Ainnocence Set 2	DELTA	0.99	45	AINNDILN2	C03-C22					ok	AB01974181	01	AIN1-1_AINNL0001	Lot# MB15NO4101
	AIN1-2, AINNL0002	AIN1-2_AINNL0002	Ainnocence Set 2	DELTA	EMPTY WELLS		AINNDILN2	D03-D22	DID NOT REC. THIS LOT #MB15NO4102 [only on packing list]				ok	AB01974182	01	AIN1-2_AINNL0002	Lot# MB15NO4102
	AIN1-2, AINNL0002	AIN1-2_AINNL0002	Ainnocence Set 2	DELTA	0.43	45	AINNDILN2	E03-E22	LOT #MB15NO2511; no duplicates of AIN1-2 rec'd				ok	AB01974183	01	AIN1-2_AINNL0002	Lot# MB15NO2511
	AIN1-4, AINNL0004	AIN1-4_AINNL0004	Ainnocence Set 2	DELTA	0.51	45	AINNDILN2	F03-F22					ok	AB01974184	01	AIN1-4_AINNL0004	Lot# MB15NO4104
	AIN1-13, AINNL0013	AIN1-13_AINNL0013	Ainnocence Set 2	DELTA	0.96	45	AINNDILN2	G03-G22					ok	AB01974185	01	AIN1-13_AINNL0013	Lot# MB15NO4113
	AIN1-15, AINNL0015	AIN1-15_AINNL0015	Ainnocence Set 2	DELTA	0.97	45	AINNDILN2	H03-H22					ok	AB01974186	01	AIN1-15_AINNL0015	Lot# MB15NO4115
	AIN1-38, AINNL0038	AIN1-38_AINNL0038	Ainnocence Set 2	DELTA	0.98	45	AINNDILN2	I03-I22					ok	AB01974187	01	AIN1-38_AINNL0038	Lot# MB15NO4138
	AIN1-39, AINNL0039	AIN1-39_AINNL0039	Ainnocence Set 2	DELTA	0.96	45	AINNDILN2	J03-J22					ok	AB01974188	01	AIN1-39_AINNL0039	Lot# MB15NO4139
	AIN1-40, AINNL0040	AIN1-40_AINNL0040	Ainnocence Set 2	DELTA	0.97	45	AINNDILN2	K03-K22					ok	AB01974189	01	AIN1-40_AINNL0040	Lot# MB15NO4140
	AIN1-41, AINNL0041	AIN1-41_AINNL0041	Ainnocence Set 2	DELTA	0.98	45	AINNDILN2	L03-L22					ok	AB01974190	01	AIN1-41_AINNL0041	Lot# MB15NO4141
	AIN1-42, AINNL0042	AIN1-42_AINNL0042	Ainnocence Set 2	DELTA	0.98	45	AINNDILN2	M03-M22					ok	AB01974191	01	AIN1-42_AINNL0042	Lot# MB15NO4142
	AIN1-11, AINNL0011	AIN1-11_AINNL0011	Ainnocence Set 2	DELTA	0.49	45	AINNDILN2	N03-N22					ok	AB01974192	01	AIN1-11_AINNL0011	Lot# MB15NO4111
	AIN1-14, AINNL0014	AIN1-14_AINNL0014	Ainnocence Set 2	DELTA	1.07	45	AINNDILN2	O03-O22					ok	AB01974193	01	AIN1-14_AINNL0014	Lot# MB15NO4114
	AIN1-17, AINNL0017	AIN1-17_AINNL0017	Ainnocence Set 2	DELTA	1.06	45	AINNDILN2	P03-P22	plated 01/24/22				ok	AB01974194	01	AIN1-17_AINNL0017	Lot# MB15NO4117
													1
	High stock conc. (col. 3) at various mg/ml -- for Ainnocence antibodies	Highstockconc.(col.3)atvariousmg/ml--forAinnocenceantibodies											1
	75ul of 1:15 high stock cmpd to col. 3; 47.5ul of media to col. 4-22	75ulof1:15highstockcmpdtocol.3;47.5ulofmediatocol.4-22											1
	1:3.16 [1/2 log] serial dilution with 22ul transfer col. 3-22	1:3.16[1/2log]serialdilutionwith22ultransfercol.3-22											1
													1
													1
													1
													1
													1
													1
													1
													1
													1
													1
													1
													1
													1
													1
													1
													1
													1

## Sheet: PLATING_3 & 4
	Antibody ID	Set	Set	Virus	High Conc*	Vol. (ul)	Plate ID	Wells	*mg/ml
	AIN1-12, AINNL0012	AIN1-12_AINNL0012	Ainnocence Set 2	DELTA	3.71	45	AINNDILN3	A03-A22					ok	AB01974195	01	AIN1-12_AINNL0012	Lot# MB15NO2405
	AIN1-20, AINNL0020	AIN1-20_AINNL0020	Ainnocence Set 2	DELTA	4.07	45	AINNDILN3	B03-B22					ok	AB01974196	01	AIN1-20_AINNL0020	Lot# MB15NO2406
	AIN1-23, AINNL0023	AIN1-23_AINNL0023	Ainnocence Set 2	DELTA	0.31	45	AINNDILN3	C03-C22					ok	AB01974197	01	AIN1-23_AINNL0023	Lot# MB15NO2407
	AIN1-19, AINNL0019	AIN1-19_AINNL0019	Ainnocence Set 2	DELTA	1.05	45	AINNDILN3	D03-D22					ok	AB01974198	01	AIN1-19_AINNL0019	Lot# MB15NO4119
	AIN1-24, AINNL0024	AIN1-24_AINNL0024	Ainnocence Set 2	DELTA	1.09	45	AINNDILN3	E03-E22					ok	AB01974199	01	AIN1-24_AINNL0024	Lot# MB15NO4124
	AIN1-25, AINNL0025	AIN1-25_AINNL0025	Ainnocence Set 2	DELTA	0.69	45	AINNDILN3	F03-F22					ok	AB01974200	01	AIN1-25_AINNL0025	Lot# MB15NO4125
	AIN1-27, AINNL0027	AIN1-27_AINNL0027	Ainnocence Set 2	DELTA	0.13	45	AINNDILN3	G03-G22					ok	AB01974201	01	AIN1-27_AINNL0027	Lot# MB15NO1901
	AIN1-34, AINNL0034	AIN1-34_AINNL0034	Ainnocence Set 2	DELTA	0.23	45	AINNDILN3	H03-H22					ok	AB01974202	01	AIN1-34_AINNL0034	Lot# MB15NO1902
	AIN1-35, AINNL0035	AIN1-35_AINNL0035	Ainnocence Set 2	DELTA	0.21	45	AINNDILN3	I03-I22					ok	AB01974203	01	AIN1-35_AINNL0035	Lot# MB15NO1903
	AIN1-37, AINNL0037	AIN1-37_AINNL0037	Ainnocence Set 2	DELTA	0.19	45	AINNDILN3	J03-J22					ok	AB01974204	01	AIN1-37_AINNL0037	Lot# MB15NO1904
	AIN1-43, AINNL0043	AIN1-43_AINNL0043	Ainnocence Set 2	DELTA	1.11	45	AINNDILN3	K03-K22					ok	AB01974205	01	AIN1-43_AINNL0043	Lot# MB15NO4143
	AIN1-44, AINNL0044	AIN1-44_AINNL0044	Ainnocence Set 2	DELTA	1.03	45	AINNDILN3	L03-L22					ok	AB01974206	01	AIN1-44_AINNL0044	Lot# MB15NO4144
	AIN1-45, AINNL0045	AIN1-45_AINNL0045	Ainnocence Set 2	DELTA	1.03	45	AINNDILN3	M03-M22					ok	AB01974207	01	AIN1-45_AINNL0045	Lot# MB15NO4145
	AIN1-46, AINNL0046	AIN1-46_AINNL0046	Ainnocence Set 2	DELTA	1.18	45	AINNDILN3	N03-N22					ok	AB01974208	01	AIN1-46_AINNL0046	Lot# MB15NO4146
	AIN1-47, AINNL0047	AIN1-47_AINNL0047	Ainnocence Set 2	DELTA	2.23	45	AINNDILN3	O03-O22					ok	AB01974209	01	AIN1-47_AINNL0047	Lot# MB15NO4147
	AIN1-48, AINNL0048	AIN1-48_AINNL0048	Ainnocence Set 2	DELTA	0.99	45	AINNDILN3	P03-P22	plated 01/24/22				ok	AB01974210	01	AIN1-48_AINNL0048	Lot# MB15NO4148
	AIN1-49, AINNL0049	AIN1-49_AINNL0049	Ainnocence Set 2	DELTA	1.01	45	AINNDILN4	A03-A22					ok	AB01974211	01	AIN1-49_AINNL0049	Lot# MB15NO4149
	AIN1-50, AINNL0050	AIN1-50_AINNL0050	Ainnocence Set 2	DELTA	1.01	45	AINNDILN4	B03-B22					ok	AB01974212	01	AIN1-50_AINNL0050	Lot# MB15NO4150
	AIN1-16, AINNL0016	AIN1-16_AINNL0016	Ainnocence Set 2	DELTA	1.03	45	AINNDILN4	C03-C22					ok	AB01974213	01	AIN1-16_AINNL0016	Lot# MB15NO4116
	AIN2-1, REGN10933	AIN2-1_REGN10933	Ainnocence Set 2	DELTA	1.81	45	AINNDILN4	D03-D22	CLIENT CTRLS				ok	AB01974161	01	AIN2-1_REGN10933	Lot# MB15OC1436
	AIN2-2, REGN10987	AIN2-2_REGN10987	Ainnocence Set 2	DELTA	2.02	45	AINNDILN4	E03-E22	plated 01/24/22				ok	AB01974162	01	AIN2-2_REGN10987	Lot# MB15OC1437
						AINNDILN4	F03-F22
						AINNDILN4	G03-G22
						AINNDILN4	H03-H22
						AINNDILN4	I03-I22
						AINNDILN4	J03-J22
						AINNDILN4	K03-K22
						AINNDILN4	L03-L22
						AINNDILN4	M03-M22
						AINNDILN4	N03-N22
						AINNDILN4	O03-O22
						AINNDILN4	P03-P22
	High stock conc. (col. 3) at various mg/ml -- for Ainnocence antibodies
	75ul of 1:15 high stock cmpd to col. 3; 47.5ul of media to col. 4-22
	1:3.16 [1/2 log] serial dilution with 22ul transfer col. 3-22
