# Supplementary material for: AI Designed, Mutation Resistant Broad Neutralizing Antibodies Against Multiple SARS-CoV-2 Strains
Source: Research Square preprint supplement (doi:10.21203/rs.3.rs-5184292/v1), 2025-03-27
Supplement: Supplementary file 4 [file Ainnocence Sets 1 & 2_SARS2 Delta_Antibodies ALL 121521.xlsx]

## Sheet: Sheet1
	Set	Date Rec'd	Label ID	Conc.	Amt/Vial	Vol/Vial	Total	Extinction Coefficient	Theoretical MW	Qty.	Lot #	Solution
				(mg/mL)	(mg)	(mL)	(mg)	(L g-1 cm-1)	(kDa)	vial(s)
1	Set 1	2021-11-30	AIN1-3, AINNL0003 antibody, human IgG1 mAb	1.05	1	0.95	1	1.59	146.72	1	Lot# MB15NO4103	aqueous, PBS
2	Set 1	2021-11-30	AIN1-5, AINNL0005 antibody, human IgG1 mAb	1.06	1	0.94	1	1.59	146.83	1	Lot# MB15NO4105	aqueous, PBS
3	Set 1	2021-11-30	AIN1-6, AINNL0006 antibody, human IgG1 mAb	1.06	1	0.94	1	1.61	146.79	1	Lot# MB15NO4106	aqueous, PBS
4	Set 1	2021-11-30	AIN1-7, AINNL0007 antibody, human IgG1 mAb	1.06	1	0.94	1	1.59	146.76	1	Lot# MB15NO4107	aqueous, PBS
5	Set 1	2021-11-30	AIN1-8, AINNL0008 antibody, human IgG1 mAb	1.06	1	0.94	1	1.59	146.67	1	Lot# MB15NO4108	aqueous, PBS
6	Set 1	2021-11-30	AIN1-9, AINNL0009 antibody, human IgG1 mAb	1.11	1	0.9	1	1.59	146.67	1	Lot# MB15NO4109	aqueous, PBS
7	Set 1	2021-11-30	AIN1-10, AINNL0010 antibody, human IgG1 mAb	1.05	1	0.95	1	1.59	146.66	1	Lot# MB15NO4110	aqueous, PBS
8	Set 1	2021-11-30	AIN1-18, AINNL0018 antibody, human IgG1 mAb	1.01	1	0.99	1	1.52	146.6	1	Lot# MB15NO4118	aqueous, PBS
9	Set 1	2021-11-30	AIN1-21, AINNL0021 antibody, human IgG1 mAb	0.99	1	1.01	1	1.52	146.62	1	Lot# MB15NO4121	aqueous, PBS
10	Set 1	2021-11-30	AIN1-22, AINNL0022 antibody, human IgG1 mAb	0.92	1	1.09	1	1.61	146.81	1	Lot# MB15NO4122	aqueous, PBS
11	Set 1	2021-11-30	AIN1-26, AINNL0026 antibody, human IgG1 mAb	0.98	1	1.02	1	1.45	145.51	1	Lot# MB15NO4126	aqueous, PBS
12	Set 1	2021-11-30	AIN1-28, AINNL0028 antibody, human IgG1 mAb	0.87	1	1.15	1	1.45	145.42	1	Lot# MB15NO4128	aqueous, PBS
13	Set 1	2021-11-30	AIN1-29, AINNL0029 antibody, human IgG1 mAb	0.9	1	1.11	1	1.45	145.45	1	Lot# MB15NO4129	aqueous, PBS
14	Set 1	2021-11-30	AIN1-30, AINNL0030 antibody, human IgG1 mAb	0.78	1	1.28	1	1.45	145.51	1	Lot# MB15NO4130	aqueous, PBS
15	Set 1	2021-11-30	AIN1-31, AINNL0031 antibody, human IgG1 mAb	0.88	1	1.14	1	1.37	145.28	1	Lot# MB15NO4131	aqueous, PBS
16	Set 1	2021-11-30	AIN1-32, AINNL0032 antibody, human IgG1 mAb	0.92	1	1.09	1	1.45	145.54	1	Lot# MB15NO4132	aqueous, PBS
17	Set 1	2021-11-30	AIN1-33, AINNL0033 antibody, human IgG1 mAb	0.96	1	1.04	1	1.45	145.34	1	Lot# MB15NO4133	aqueous, PBS
18	Set 1	2021-11-30	AIN1-36, AINNL0036 antibody, human IgG1 mAb	0.85	1	1.18	1	1.45	145.53	1	Lot# MB15NO4136	aqueous, PBS
19	Set 2	2021-12-14	AIN1-1, AINNL0001 antibody, human IgG1 mAb	0.99	1	1.01	1	1.67	146.77	1	Lot# MB15NO4101	aqueous, PBS
20	Set 2	2021-12-14	AIN1-2, AINNL0002 antibody, human IgG1 mAb	0.44	1	2.27	1	1.69	146.9	1	Lot# MB15NO4102	aqueous, PBS	DID NOT RECEIVE
21	Set 2	2021-12-14	AIN1-2, AINNL0002 antibody, human IgG1 mAb	0.43	1	2.33	1	not given	not given	1	Lot# MB15NO2511	aqueous, PBS	2 samples of AIN1-2 showing on packing list but we only rec'd this one
22	Set 2	2021-12-14	AIN1-4, AINNL0004 antibody, human IgG1 mAb	0.51	1	1.96	1	1.67	146.81	1	Lot# MB15NO4104	aqueous, PBS
23	Set 2	2021-12-14	AIN1-13, AINNL0013 antibody, human IgG1 mAb	0.96	1	1.04	1	1.59	146.74	1	Lot# MB15NO4113	aqueous, PBS
24	Set 2	2021-12-14	AIN1-15, AINNL0015 antibody, human IgG1 mAb	0.97	1	1.03	1	1.59	146.63	1	Lot# MB15NO4115	aqueous, PBS
25	Set 2	2021-12-14	AIN1-38, AINNL0038 antibody, human IgG1 mAb	0.98	1	1.02	1	1.37	145.34	1	Lot# MB15NO4138	aqueous, PBS
26	Set 2	2021-12-14	AIN1-39, AINNL0039 antibody, human IgG1 mAb	0.96	1	1.04	1	1.45	145.37	1	Lot# MB15NO4139	aqueous, PBS
27	Set 2	2021-12-14	AIN1-40, AINNL0040 antibody, human IgG1 mAb	0.97	1	1.03	1	1.36	145.05	1	Lot# MB15NO4140	aqueous, PBS
28	Set 2	2021-12-14	AIN1-41, AINNL0041 antibody, human IgG1 mAb	0.98	1	1.02	1	1.36	145.01	1	Lot# MB15NO4141	aqueous, PBS
29	Set 2	2021-12-14	AIN1-42, AINNL0042 antibody, human IgG1 mAb	0.98	1	1.02	1	1.37	145.37	1	Lot# MB15NO4142	aqueous, PBS
30	Set 2	2021-12-14	AIN1-11, AINNL0011 antibody, human IgG1 mAb	0.49	1	2.04	1	1.59	146.61	1	Lot# MB15NO4111	aqueous, PBS
31	Set 2	2021-12-14	AIN1-14, AINNL0014 antibody, human IgG1 mAb	1.07	1	0.93	1	1.58	146.51	1	Lot# MB15NO4114	aqueous, PBS
32	Set 2	2021-12-14	AIN1-17, AINNL0017 antibody, human IgG1 mAb	1.06	1	0.94	1	1.58	146.39	1	Lot# MB15NO4117	aqueous, PBS
33	Set 2	2021-12-14	AIN1-12, AINNL0012 antibody, human IgG1 mAb	3.71	1	0.27	1	1.59	146.69	1	Lot# MB15NO2405	aqueous, PBS
34	Set 2	2021-12-14	AIN1-20, AINNL0020 antibody, human IgG1 mAb	4.07	1	0.25	1	1.52	146.54	1	Lot# MB15NO2406	aqueous, PBS
35	Set 2	2021-12-14	AIN1-23, AINNL0023 antibody, human IgG1 mAb	0.31	1	3.23	1	1.61	146.92	1	Lot# MB15NO2407	aqueous, PBS
36	Set 2	2021-12-14	AIN1-19, AINNL0019 antibody, human IgG1 mAb	1.05	1	0.95	1	1.53	146.5	1	Lot# MB15NO4119	aqueous, PBS
37	Set 2	2021-12-14	AIN1-24, AINNL0024 antibody, human IgG1 mAb	1.09	1	0.92	1	1.59	146.68	1	Lot# MB15NO4124	aqueous, PBS
38	Set 2	2021-12-14	AIN1-25, AINNL0025 antibody, human IgG1 mAb	0.69	1	1.45	1	1.61	146.9	1	Lot# MB15NO4125	aqueous, PBS
39	Set 2	2021-12-14	AIN1-27, AINNL0027 antibody, human IgG1 mAb	0.13	1	7.69	1	1.45	145.46	1	Lot# MB15NO1901	aqueous, PBS
40	Set 2	2021-12-14	AIN1-34, AINNL0034 antibody, human IgG1 mAb	0.23	1	4.35	1	1.53	145.63	1	Lot# MB15NO1902	aqueous, PBS
41	Set 2	2021-12-14	AIN1-35, AINNL0035 antibody, human IgG1 mAb	0.21	1	4.76	1	1.45	145.49	1	Lot# MB15NO1903	aqueous, PBS
42	Set 2	2021-12-14	AIN1-37, AINNL0037 antibody, human IgG1 mAb	0.19	1	5.26	1	1.45	145.48	1	Lot# MB15NO1904	aqueous, PBS
43	Set 2	2021-12-14	AIN1-43, AINNL0043 antibody, human IgG1 mAb	1.11	1	0.9	1	1.54	114.04	1	Lot# MB15NO4143	aqueous, PBS
44	Set 2	2021-12-14	AIN1-44, AINNL0044 antibody, human IgG1 mAb	1.03	1	0.97	1	1.54	144.04	1	Lot# MB15NO4144	aqueous, PBS
45	Set 2	2021-12-14	AIN1-45, AINNL0045 antibody, human IgG1 mAb	1.03	1	0.97	1	1.54	143.94	1	Lot# MB15NO4145	aqueous, PBS
46	Set 2	2021-12-14	AIN1-46, AINNL0046 antibody, human IgG1 mAb	1.18	1	0.85	1	1.54	143.9	1	Lot# MB15NO4146	aqueous, PBS
47	Set 2	2021-12-14	AIN1-47, AINNL0047 antibody, human IgG1 mAb	2.23	1	0.45	1	1.54	143.98	1	Lot# MB15NO4147	aqueous, PBS
48	Set 2	2021-12-14	AIN1-48, AINNL0048 antibody, human IgG1 mAb	0.99	1	1.01	1	1.62	144.18	1	Lot# MB15NO4148	aqueous, PBS
49	Set 2	2021-12-14	AIN1-49, AINNL0049 antibody, human IgG1 mAb	1.01	1	0.99	1	1.54	143.98	1	Lot# MB15NO4149	aqueous, PBS
50	Set 2	2021-12-14	AIN1-50, AINNL0050 antibody, human IgG1 mAb	1.01	1	0.99	1	1.54	143.98	1	Lot# MB15NO4150	aqueous, PBS
51	Set 2	2021-12-14	AIN1-16, AINNL0016 antibody, human IgG1 mAb	1.03	1	0.97	1	not given	not given	1	Lot# MB15NO4116	aqueous, PBS
52	Set 2	2021-12-14	AIN2-1, REGN10933 antibody, Human IgG1 mAb	1.81	0.1	0.06	0.1	1.37	145.2	1	Lot# MB15OC1436	aqueous, PBS	CTRL1
53	Set 2	2021-12-14	AIN2-2, REGN10987 antibody, Human IgG1 mAb	2.02	0.1	0.05	0.1	1.56	144.11	1	Lot# MB15OC1437	aqueous, PBS	CTRL2

## Sheet: CONC
			Conc.	(mg/mL)
		ctrls	2.02
			1.81	2
		high conc	4.07
			3.71
			2.23	3
		~ 1mg/ml	1.18
			1.11
			1.11
			1.09
			1.07
			1.06
			1.06
			1.06
			1.06
			1.06
			1.05
			1.05
			1.05
			1.03
			1.03
			1.03
			1.01
			1.01
			1.01
			0.99
			0.99
			0.99
			0.98
			0.98
			0.98
			0.98
			0.97
			0.97
			0.96
			0.96
			0.96
			0.92
			0.92
			0.9
			0.88
			0.87
			0.85	37
		low conc	0.78
			0.69
			0.51
			0.49
			0.44
			0.43
			0.31
			0.23
			0.21
			0.19
			0.13	11
