# Supplementary material for: AI Designed, Mutation Resistant Broad Neutralizing Antibodies Against Multiple SARS-CoV-2 Strains
Source: Research Square preprint supplement (doi:10.21203/rs.3.rs-5184292/v1), 2025-03-27
Supplement: Supplementary file 7 [file Sino_SARS-CoV-2_assay data.xlsx]

## Sheet: Sheet1
Sequence Name	Assay1	ELISA Assay Value (Delta)	Delta Score	Assay2	ELISA Assay Value (Omicron)	Omicron Score
AIN1-1	ELISA delta RBD protein(40592-V08H90)-1ug/ml	4.1053	0.737356	ELISA Omicron RBD protein(40592-V08H121)-1ug/ml	0.1034	0.737793
AIN1-2	ELISA delta RBD protein(40592-V08H90)-1ug/ml	4.2922	0.735671	ELISA Omicron RBD protein(40592-V08H121)-1ug/ml	2.6601	0.737109
AIN1-3	ELISA delta RBD protein(40592-V08H90)-1ug/ml	0.0044	0.737151	ELISA Omicron RBD protein(40592-V08H121)-1ug/ml	0.0113	0.736655
AIN1-4	ELISA delta RBD protein(40592-V08H90)-1ug/ml	4.2055	0.737102	ELISA Omicron RBD protein(40592-V08H121)-1ug/ml	3.4791	0.737941
AIN1-5	ELISA delta RBD protein(40592-V08H90)-1ug/ml	0.0199	0.735173	ELISA Omicron RBD protein(40592-V08H121)-1ug/ml	0.0112	0.735915
AIN1-6	ELISA delta RBD protein(40592-V08H90)-1ug/ml	0.0078	0.734798	ELISA Omicron RBD protein(40592-V08H121)-1ug/ml	0.0017	0.736055
AIN1-7	ELISA delta RBD protein(40592-V08H90)-1ug/ml	4.0775	0.737819	ELISA Omicron RBD protein(40592-V08H121)-1ug/ml	1.1583	0.739073
AIN1-8	ELISA delta RBD protein(40592-V08H90)-1ug/ml	4.2922	0.728151	ELISA Omicron RBD protein(40592-V08H121)-1ug/ml	0.9929	0.718195
AIN1-9	ELISA delta RBD protein(40592-V08H90)-1ug/ml	4.0711	0.736046	ELISA Omicron RBD protein(40592-V08H121)-1ug/ml	0.0886	0.736173
AIN1-10	ELISA delta RBD protein(40592-V08H90)-1ug/ml	4.2559	0.732551	ELISA Omicron RBD protein(40592-V08H121)-1ug/ml	3.6913	0.734343
AIN1-11	ELISA delta RBD protein(40592-V08H90)-1ug/ml	4.1763	0.726784	ELISA Omicron RBD protein(40592-V08H121)-1ug/ml	4.0716	0.70449
AIN1-12	ELISA delta RBD protein(40592-V08H90)-1ug/ml	3.8459	0.726307	ELISA Omicron RBD protein(40592-V08H121)-1ug/ml	0.1202	0.72624
AIN1-13	ELISA delta RBD protein(40592-V08H90)-1ug/ml	0.3441	0.789489	ELISA Omicron RBD protein(40592-V08H121)-1ug/ml	0.0031	0.730618
AIN1-14	ELISA delta RBD protein(40592-V08H90)-1ug/ml	4.2637	0.729759	ELISA Omicron RBD protein(40592-V08H121)-1ug/ml	4.1806	0.514113
AIN1-15	ELISA delta RBD protein(40592-V08H90)-1ug/ml	0.5669	0.769631	ELISA Omicron RBD protein(40592-V08H121)-1ug/ml	0.0077	0.736548
AIN1-16	ELISA delta RBD protein(40592-V08H90)-1ug/ml	2.2313	0.735071	ELISA Omicron RBD protein(40592-V08H121)-1ug/ml	0.0184	0.729223
AIN1-17	ELISA delta RBD protein(40592-V08H90)-1ug/ml	4.0903	0.61476	ELISA Omicron RBD protein(40592-V08H121)-1ug/ml	3.2732	0.494987
AIN1-18	ELISA delta RBD protein(40592-V08H90)-1ug/ml	3.6244	0.722305	ELISA Omicron RBD protein(40592-V08H121)-1ug/ml	0.0108	0.58736
AIN1-19	ELISA delta RBD protein(40592-V08H90)-1ug/ml	4.0675	0.729516	ELISA Omicron RBD protein(40592-V08H121)-1ug/ml	0.2366	0.52672
AIN1-20	ELISA delta RBD protein(40592-V08H90)-1ug/ml	0.348	0.840367	ELISA Omicron RBD protein(40592-V08H121)-1ug/ml	0.0056	0.739495
AIN1-21	ELISA delta RBD protein(40592-V08H90)-1ug/ml	3.4244	0.790303	ELISA Omicron RBD protein(40592-V08H121)-1ug/ml	0.0042	0.735957
AIN1-22	ELISA delta RBD protein(40592-V08H90)-1ug/ml	4.0128	0.724848	ELISA Omicron RBD protein(40592-V08H121)-1ug/ml	0.0155	0.727767
AIN1-23	ELISA delta RBD protein(40592-V08H90)-1ug/ml	0.0015	0.733851	ELISA Omicron RBD protein(40592-V08H121)-1ug/ml	0.0069	0.734515
AIN1-24	ELISA delta RBD protein(40592-V08H90)-1ug/ml	0.333	0.671487	ELISA Omicron RBD protein(40592-V08H121)-1ug/ml	0.0053	0.686902
AIN1-25	ELISA delta RBD protein(40592-V08H90)-1ug/ml	0.2561	0.707684	ELISA Omicron RBD protein(40592-V08H121)-1ug/ml	0.0083	0.543005
AIN1-26	ELISA delta RBD protein(40592-V08H90)-1ug/ml	0.0071	0.636219	ELISA Omicron RBD protein(40592-V08H121)-1ug/ml	0.0072	0.494652
AIN1-27	ELISA delta RBD protein(40592-V08H90)-1ug/ml	0.8223	0.737636	ELISA Omicron RBD protein(40592-V08H121)-1ug/ml	0.0014	0.496168
AIN1-28	ELISA delta RBD protein(40592-V08H90)-1ug/ml	0.2196	0.506849	ELISA Omicron RBD protein(40592-V08H121)-1ug/ml	0.001	0.495056
AIN1-29	ELISA delta RBD protein(40592-V08H90)-1ug/ml	1.3132	0.588329	ELISA Omicron RBD protein(40592-V08H121)-1ug/ml	0.0047	0.495155
AIN1-30	ELISA delta RBD protein(40592-V08H90)-1ug/ml	0.2244	0.592462	ELISA Omicron RBD protein(40592-V08H121)-1ug/ml	0.0039	0.494318
AIN1-31	ELISA delta RBD protein(40592-V08H90)-1ug/ml	4.3363	0.49519	ELISA Omicron RBD protein(40592-V08H121)-1ug/ml	3.6055	0.494775
AIN1-32	ELISA delta RBD protein(40592-V08H90)-1ug/ml	0.128	0.742424	ELISA Omicron RBD protein(40592-V08H121)-1ug/ml	0.0117	0.497005
AIN1-33	ELISA delta RBD protein(40592-V08H90)-1ug/ml	0.0043	0.510908	ELISA Omicron RBD protein(40592-V08H121)-1ug/ml	0.0025	0.494966
AIN1-34	ELISA delta RBD protein(40592-V08H90)-1ug/ml	0.013	0.693215	ELISA Omicron RBD protein(40592-V08H121)-1ug/ml	0.0045	0.494869
AIN1-35	ELISA delta RBD protein(40592-V08H90)-1ug/ml	0.0396	0.598018	ELISA Omicron RBD protein(40592-V08H121)-1ug/ml	0.0023	0.494843
AIN1-36	ELISA delta RBD protein(40592-V08H90)-1ug/ml	0.0115	0.636376	ELISA Omicron RBD protein(40592-V08H121)-1ug/ml	0.0092	0.495072
AIN1-37	ELISA delta RBD protein(40592-V08H90)-1ug/ml	0.0486	0.7919	ELISA Omicron RBD protein(40592-V08H121)-1ug/ml	0.0239	0.742536
AIN1-38	ELISA delta RBD protein(40592-V08H90)-1ug/ml	4.1174	0.49623	ELISA Omicron RBD protein(40592-V08H121)-1ug/ml	0.0482	0.495037
AIN1-39	ELISA delta RBD protein(40592-V08H90)-1ug/ml	0.0272	0.512631	ELISA Omicron RBD protein(40592-V08H121)-1ug/ml	0.0077	0.494671
AIN1-40	ELISA delta RBD protein(40592-V08H90)-1ug/ml	4.1311	0.539476	ELISA Omicron RBD protein(40592-V08H121)-1ug/ml	0.5549	0.494952
AIN1-41	ELISA delta RBD protein(40592-V08H90)-1ug/ml	2.275	0.507859	ELISA Omicron RBD protein(40592-V08H121)-1ug/ml	0.0088	0.494718
AIN1-42	ELISA delta RBD protein(40592-V08H90)-1ug/ml	4.114	0.603569	ELISA Omicron RBD protein(40592-V08H121)-1ug/ml	0.0047	0.495263
AIN1-43	ELISA delta RBD protein(40592-V08H90)-1ug/ml	4.3232	0.551616	ELISA Omicron RBD protein(40592-V08H121)-1ug/ml	0.012	0.426467
AIN1-44	ELISA delta RBD protein(40592-V08H90)-1ug/ml	0.0155	0.495796	ELISA Omicron RBD protein(40592-V08H121)-1ug/ml	0.0099	0.476333
AIN1-45	ELISA delta RBD protein(40592-V08H90)-1ug/ml	4.1077	0.483924	ELISA Omicron RBD protein(40592-V08H121)-1ug/ml	0.0116	0.311178
AIN1-46	ELISA delta RBD protein(40592-V08H90)-1ug/ml	4.2431	0.513346	ELISA Omicron RBD protein(40592-V08H121)-1ug/ml	0.0094	0.456525
AIN1-47	ELISA delta RBD protein(40592-V08H90)-1ug/ml	4.0297	0.499453	ELISA Omicron RBD protein(40592-V08H121)-1ug/ml	0.0053	0.49876
AIN1-48	ELISA delta RBD protein(40592-V08H90)-1ug/ml	4.348	0.507353	ELISA Omicron RBD protein(40592-V08H121)-1ug/ml	0.0028	0.402587
AIN1-49	ELISA delta RBD protein(40592-V08H90)-1ug/ml	4.1112	0.50649	ELISA Omicron RBD protein(40592-V08H121)-1ug/ml	0.0029	0.515236
AIN1-50	ELISA delta RBD protein(40592-V08H90)-1ug/ml	4.265	0.593081	ELISA Omicron RBD protein(40592-V08H121)-1ug/ml	0.0089	0.660812
AIN4-1	ELISA delta RBD protein(40592-V08H90)-1ug/ml	4.1347	0.735041	ELISA Omicron RBD protein(40592-V08H121)-1ug/ml	3.9398	0.736347
AIN4-2	ELISA delta RBD protein(40592-V08H90)-1ug/ml	1.9679	0.736944	ELISA Omicron RBD protein(40592-V08H121)-1ug/ml	0.0128	0.736946
AIN4-3	ELISA delta RBD protein(40592-V08H90)-1ug/ml	4.2846	0.73654	ELISA Omicron RBD protein(40592-V08H121)-1ug/ml	4.0337	0.73794
AIN4-4	ELISA delta RBD protein(40592-V08H90)-1ug/ml	4.3793	0.73876	ELISA Omicron RBD protein(40592-V08H121)-1ug/ml	4.1266	0.735215
AIN4-5	ELISA delta RBD protein(40592-V08H90)-1ug/ml	4.0401	0.737098	ELISA Omicron RBD protein(40592-V08H121)-1ug/ml	0.1945	0.73179
AIN4-6	ELISA delta RBD protein(40592-V08H90)-1ug/ml	0.0048	0.749459	ELISA Omicron RBD protein(40592-V08H121)-1ug/ml	0.0018	0.739278
AIN4-7	ELISA delta RBD protein(40592-V08H90)-1ug/ml	4.1757	0.745994	ELISA Omicron RBD protein(40592-V08H121)-1ug/ml	4.0341	0.737773
AIN4-8	ELISA delta RBD protein(40592-V08H90)-1ug/ml	0.0569	0.742436	ELISA Omicron RBD protein(40592-V08H121)-1ug/ml	0.0025	0.737309
AIN4-9	ELISA delta RBD protein(40592-V08H90)-1ug/ml	4.1745	0.736539	ELISA Omicron RBD protein(40592-V08H121)-1ug/ml	0.4986	0.732911
AIN4-10	ELISA delta RBD protein(40592-V08H90)-1ug/ml	4.3669	0.987063	ELISA Omicron RBD protein(40592-V08H121)-1ug/ml	3.937	0.740917
AIN4-11	ELISA delta RBD protein(40592-V08H90)-1ug/ml	4.1581	0.730726	ELISA Omicron RBD protein(40592-V08H121)-1ug/ml	3.9535	0.732519
AIN4-12	ELISA delta RBD protein(40592-V08H90)-1ug/ml	0.9398	0.734957	ELISA Omicron RBD protein(40592-V08H121)-1ug/ml	0.0034	0.730832
AIN4-13	ELISA delta RBD protein(40592-V08H90)-1ug/ml	0.0242	0.731153	ELISA Omicron RBD protein(40592-V08H121)-1ug/ml	0.0144	0.7332
AIN4-14	ELISA delta RBD protein(40592-V08H90)-1ug/ml	0.0346	0.732178	ELISA Omicron RBD protein(40592-V08H121)-1ug/ml	0.0009	0.732018
AIN4-15	ELISA delta RBD protein(40592-V08H90)-1ug/ml	0.1109	0.72329	ELISA Omicron RBD protein(40592-V08H121)-1ug/ml	0.0506	0.727667
AIN4-16	ELISA delta RBD protein(40592-V08H90)-1ug/ml	4.2605	0.73461	ELISA Omicron RBD protein(40592-V08H121)-1ug/ml	4.0787	0.726853
AIN4-17	ELISA delta RBD protein(40592-V08H90)-1ug/ml	4.1082	0.735972	ELISA Omicron RBD protein(40592-V08H121)-1ug/ml	0.3354	0.729375
AIN4-18	ELISA delta RBD protein(40592-V08H90)-1ug/ml	4.188	0.736698	ELISA Omicron RBD protein(40592-V08H121)-1ug/ml	4.074	0.735317
AIN4-19	ELISA delta RBD protein(40592-V08H90)-1ug/ml	4.1088	0.730967	ELISA Omicron RBD protein(40592-V08H121)-1ug/ml	0.9935	0.728981
AIN4-20	ELISA delta RBD protein(40592-V08H90)-1ug/ml	0.1347	0.723192	ELISA Omicron RBD protein(40592-V08H121)-1ug/ml	0.0422	0.728925
