# Supplementary material for: AI Designed, Mutation Resistant Broad Neutralizing Antibodies Against Multiple SARS-CoV-2 Strains
Source: Research Square preprint supplement (doi:10.21203/rs.3.rs-5184292/v1), 2025-03-27
Supplement: Supplementary file 10 [file S1_SinoBiologicalELISABatch1.xlsx]

## Sheet: Sheet1
				Table S1: ELISA data and
2nd			Jackson：Goat Anti-Human IgG (H+L)/HRP-1:5000
Coating			Wild type (wuhan) RBD protein(40592-V08B)-0.03ug/ml	Wild type (wuhan) RBD protein(40592-V08B)-1ug/ml	delta RBD protein(40592-V08H90)-0.03ug/ml	delta RBD protein(40592-V08H90)-1ug/ml	Omicron RBD protein(40592-V08H121)-0.03ug/ml	Omicron RBD protein(40592-V08H121)-1ug/ml
Sampling(1ug/mL)			OD450-B	OD450-B	OD450-B	OD450-B	OD450-B	OD450-B
AIN5	AIN1-1	AINNL0001	0.0127	4.108	0.0549	4.1053	-0.01	0.10335
AIN5	AIN1-2	AINNL0002	0.2066	4.1752	0.5967	4.29215	-0.0102	2.6601
AIN5	AIN1-3	AINNL0003	-0.00155	0.02595	-0.0082	-0.0044	-0.01215	-0.01125
AIN5	AIN1-4	AINNL0004	0.3059	4.1661	0.80245	4.20545	-0.00965	3.47905
AIN5	AIN1-5	AINNL0005	-0.00225	-0.00695	-0.00705	-0.01985	-0.01365	-0.01115
AIN5	AIN1-6	AINNL0006	0.003	0.0291	-0.0042	0.0078	-0.00775	0.0017
AIN5	AIN1-7	AINNL0007	0.07655	4.05495	0.2222	4.0775	-0.00415	1.1583
AIN5	AIN1-8	AINNL0008	0.2241	4.28925	0.84885	4.29215	-0.0113	0.9929
AIN5	AIN1-9	AINNL0009	0.0273	4.1427	0.1278	4.0711	-0.01345	0.0886
AIN5	AIN1-10	AINNL0010	0.26475	4.1803	0.7526	4.2559	-0.01055	3.69125
AIN5	AIN1-11	AINNL0011	1.01475	4.18205	2.1702	4.17625	0.03945	4.0716
AIN5	AIN1-12	AINNL0012	0.01015	3.4168	0.0335	3.8459	-0.0146	0.1202
AIN5	AIN1-13	AINNL0013	0.0002	0.315	-0.00525	0.3441	-0.01455	-0.00305
AIN5	AIN1-14	AINNL0014	1.0897	4.4872	2.66625	4.26365	0.0444	4.1806
AIN5	AIN1-15	AINNL0015	-0.00265	0.3238	0.0073	0.56685	-0.01225	-0.00765
AIN5	AIN1-16	AINNL0016	0.0097	1.3727	0.002	2.23125	-0.00835	0.0184
AIN5	AIN1-17	AINNL0017	0.23515	4.142	0.53435	4.0903	-0.0117	3.27315
AIN5	AIN1-18	AINNL0018	0.0045	3.05675	0.00865	3.62435	-0.0139	0.0108
AIN5	AIN1-19	AINNL0019	0.0834	4.07055	0.252	4.0675	-0.01175	0.23655
AIN5	AIN1-20	AINNL0020	0.00535	0.311	-0.00705	0.34795	-0.00745	-0.0056
AIN5	AIN1-21	AINNL0021	0.00395	2.2675	0.0043	3.4244	-0.0118	0.00415
AIN5	AIN1-22	AINNL0022	0.0217	3.376	0.0294	4.0128	-0.0075	0.0155
AIN5	AIN1-23	AINNL0023	0.00135	0.01195	-0.00855	-0.00145	-0.00865	-0.0069
AIN5	AIN1-24	AINNL0024	0.0042	0.3305	-0.00975	0.33295	-0.00535	-0.0053
AIN5	AIN1-25	AINNL0025	0.0532	0.3767	0.07565	0.25605	-0.00665	-0.00825
AIN5	AIN1-26	AINNL0026	-0.00085	0.01095	-0.00295	-0.0071	-0.00765	-0.0072
AIN5	AIN1-27	AINNL0027	0.6517	0.7255	0.0437	0.8223	-0.0092	0.0014
AIN5	AIN1-28	AINNL0028	0.00465	0.144	0.01205	0.21955	0.00105	0.001
AIN5	AIN1-29	AINNL0029	-0.00015	0.6301	-0.0067	1.3132	-0.0111	-0.0047
AIN5	AIN1-30	AINNL0030	-0.0026	0.19655	-0.0097	0.22435	-0.01175	0.00385
AIN5	AIN1-31	AINNL0031	1.6091	4.53645	3.0725	4.3363	-0.01195	3.60545
AIN5	AIN1-32	AINNL0032	0.00075	0.0623	-0.00975	0.128	-0.01115	0.0117
AIN5	AIN1-33	AINNL0033	0.00425	0.02565	-0.0094	0.0043	-0.01525	-0.00245
AIN5	AIN1-34	AINNL0034	0.01025	0.06005	-0.00525	0.013	-0.0128	-0.0045
AIN5	AIN1-35	AINNL0035	0.01165	0.25345	-0.00015	0.0396	-0.01035	0.00225
AIN5	AIN1-36	AINNL0036	-0.0019	0.1874	-0.00855	-0.01145	-0.0123	-0.00915
AIN5	AIN1-37	AINNL0037	0.02665	0.10455	0.0767	0.04855	-0.00045	0.0239
AIN5	AIN1-38	AINNL0038	0.6348	4.1343	1.8515	4.11735	-0.0081	0.04815
AIN5	AIN1-39	AINNL0039	0.00365	0.0441	-0.0096	0.02715	-0.012	-0.00765
AIN5	AIN1-40	AINNL0040	0.68715	4.11515	1.92145	4.1311	-0.01265	0.55485
AIN5	AIN1-41	AINNL0041	0.02745	1.5525	0.00235	2.275	-0.0128	-0.00875
AIN5	AIN1-42	AINNL0042	0.8965	4.0895	2.16385	4.11395	-0.01355	0.00465
AIN5	AIN1-43	AINNL0043	0.29575	4.2769	0.4777	4.32315	-0.0146	-0.012
AIN5	AIN1-44	AINNL0044	-0.00295	-0.00225	-0.0063	-0.01545	-0.01305	-0.0099
AIN5	AIN1-45	AINNL0045	0.6789	4.121	1.20175	4.10765	-0.01395	-0.01155
AIN5	AIN1-46	AINNL0046	0.14175	4.12925	0.19715	4.2431	-0.0136	-0.0094
AIN5	AIN1-47	AINNL0047	0.18055	4.0976	0.40655	4.0297	-0.01465	-0.00525
AIN5	AIN1-48	AINNL0048	1.06885	4.29775	2.43345	4.348	-0.01015	-0.0028
AIN5	AIN1-49	AINNL0049	0.397	4.1379	0.79815	4.11115	-0.00765	0.0029
AIN5	AIN1-50	AINNL0050	0.3657	4.33025	0.49455	4.26495	-0.0139	0.0089
AIN5	AIN2-1	REGN10933 antibody, Human IgG1 mAb	1.76815	4.11885	3.4974	4.1122	-0.0047	1.8235
AIN5	TJ41A-2	IgG1- S309	3.95955	4.344	4.1185	4.38725	0.07675	4.18905
Negative control	HG1K	MA15NO1706	-0.002	-0.00255	-0.0095	-0.001	-0.00945	-0.01015
Positive control	2019-nCoV-mh676-IgG1(o)	TB20MA0458	4.10925	4.2347	4.4108	3.9926	3.38535	4.236
	cat#40150-D005
