# Supplementary material for: AI Designed, Mutation Resistant Broad Neutralizing Antibodies Against Multiple SARS-CoV-2 Strains
Source: Research Square preprint supplement (doi:10.21203/rs.3.rs-5184292/v1), 2025-03-27
Supplement: Supplementary file 13 [file S2_SinoBiologicalELISABatch2.xlsx]

## Sheet: Sheet1
2nd			Jackson：Goat Anti-Human IgG (H+L)/HRP-1:5000
Coating			Wild type (wuhan) RBD protein(40592-V08B)-0.03ug/ml	Wild type (wuhan) RBD protein(40592-V08B)-1ug/ml	delta RBD protein(40592-V08H90)-0.03ug/ml	delta RBD protein(40592-V08H90)-1ug/ml	Omicron RBD protein(40592-V08H121)-0.03ug/ml	Omicron RBD protein(40592-V08H121)-1ug/ml
Sampling(1ug/mL)			OD450-B	OD450-B	OD450-B	OD450-B	OD450-B	OD450-B
1	22AIN4-1	MB16JA4101	0.7177	4.06725	1.3605	4.1347	0.0079	3.9398
2	22AIN4-2	MB16JA4102	-0.00425	1.5616	-0.00635	1.9679	-0.00095	0.0128
3	22AIN4-3	MB16JA4103	1.51855	4.35905	1.9887	4.28455	0.053	4.0337
4	22AIN4-4	MB16JA4104	1.3533	4.36475	2.15205	4.37925	0.01565	4.12655
5	22AIN4-5	MB16JA4105	0.0106	3.9875	0.0156	4.0401	-0.0002	0.1945
6	22AIN4-6	MB16JA4106	-0.00495	0.0593	-0.00515	0.00475	0.0089	-0.0018
7	22AIN4-7	MB16JA4107	1.9959	4.06915	2.7544	4.17565	0.0974	4.03405
8	22AIN4-8	MB16JA4108	-0.00055	0.07445	0.00085	0.0569	0.00135	0.00245
9	22AIN4-9	MB16JA4109	0.03115	4.1013	0.05985	4.1745	-0.00115	0.49855
10	22AIN4-10	MB16JA4110	0.7606	4.2654	1.1978	4.3669	0.0069	3.93695
11	22AIN4-11	MB16JA4111	0.70665	4.13945	0.97605	4.15805	0.0077	3.9535
12	22AIN4-12	MB16JA4112	0.0017	0.78925	-0.00535	0.93975	-0.00255	0.0034
13	22AIN4-13	MB16JA4113	0.01415	0.05675	-0.00365	0.02415	-0.0009	0.01435
14	22AIN4-14	MB16JA4114	-0.00305	0.0649	-0.0057	0.0346	-0.00095	-0.00095
15	22AIN4-15	MB16JA4115	0.0352	0.12895	0.03355	0.11085	-0.0009	0.05055
16	22AIN4-16	MB16JA4116	0.6512	4.22795	1.18945	4.2605	0.01385	4.07865
17	22AIN4-17	MB16JA4117	0.03365	4.10885	0.0749	4.1082	-0.0006	0.3354
18	22AIN4-18	MB16JA4118	0.71835	4.41235	1.2813	4.18795	0.01745	4.074
19	22AIN4-19	MB16JA4119	0.06075	4.0799	0.0927	4.1088	0.00325	0.9935
20	22AIN4-20	MB16JA4120	0.05175	0.20505	0.03435	0.13465	-0.0025	0.0422
Negative control	HG1K	MA15NO1706	-0.00745	0.02635	-0.0096	-0.00625	-0.00355	-0.00605
Positive control	2019-nCoV-mh676-IgG1(o)	TB20MA0458	4.0576	4.07285	4.3384	4.2139	2.9835	4.1344
	cat#40150-D005
