# Supplementary material for: AI Designed, Mutation Resistant Broad Neutralizing Antibodies Against Multiple SARS-CoV-2 Strains
Source: Research Square preprint supplement (doi:10.21203/rs.3.rs-5184292/v1), 2025-03-27
Supplement: Supplementary file 16 [file S3_SinoBiologicalELISAIC50.xlsx]

## Sheet: Data
1	2nd		Goat Anti-Human IgG (H+L)/HRP-1：5000
	Coating		Wild type (wuhan) RBD protein(40592-V08B)-0.03ug/ml	Wild type (wuhan) RBD protein(40592-V08B)-1ug/ml	delta RBD protein(40592-V08H90)-0.03ug/ml	delta RBD protein(40592-V08H90)-1ug/ml	Omicron-Spike RBD(40592-V08H121)-0.03ug/ml	Omicron-Spike RBD(40592-V08H121)-1ug/ml
	sample(ug/ml)		OD450-Blank	OD450-Blank	OD450-Blank	OD450-Blank	OD450-Blank	OD450-Blank		antibody	AIN7-22AIN4-1
	0.00137174		0.08135	1.0897	0.069	0.9871	-0.0035	0.07045		coat antibody	EC50(ug/mL)
	0.00411523		0.27645	2.7301	0.19935	2.6558	-0.0005	0.25655		Wild type (wuhan) RBD protein-0.03ug/ml	0.15753
	0.0123457		0.58445	4.1145	0.39285	4.1629	-0.0038	0.59955		Wild type (wuhan) RBD protein-1ug/ml	0.00844
	0.037037		0.94165	4.2885	0.6323	4.4362	-0.00315	1.4251		delta RBD protein-0.03ug/ml	1.18725
	0.111111		1.2362	4.16215	0.79325	4.0099	-0.00315	2.87735		delta RBD protein-1ug/ml	0.00902
	0.333333		1.5285	4.34545	1.12055	4.4176	-0.0015	3.7331		Omicron RBD protein-0.03ug/ml	1.0725
	AIN7-22AIN4-1-1ug/mL		1.96975	4.22355	1.5691	4.11895	0.0086	4.1259		Omicron RBD protein-1ug/ml	0.06657
2	2nd		Goat Anti-Human IgG (H+L)/HRP-1：5000
	Coating		Wild type (wuhan) RBD protein(40592-V08B)-0.03ug/ml	Wild type (wuhan) RBD protein(40592-V08B)-1ug/ml	delta RBD protein(40592-V08H90)-0.03ug/ml	delta RBD protein(40592-V08H90)-1ug/ml	Omicron-Spike RBD(40592-V08H121)-0.03ug/ml	Omicron-Spike RBD(40592-V08H121)-1ug/ml
	sample(ug/ml)		OD450-Blank	OD450-Blank	OD450-Blank	OD450-Blank	OD450-Blank	OD450-Blank		antibody	AIN7-22AIN4-3
	0.00137174		0.1771	1.2313	0.1598	1.11855	-0.0005	0.60065		coat antibody	EC50(ug/mL)
	0.00411523		0.44445	3.10115	0.4187	2.89095	-0.00065	1.45715		Wild type (wuhan) RBD protein-0.03ug/ml	0.05892
	0.0123457		0.99505	4.19805	0.8135	4.04625	0.0072	3.26565		Wild type (wuhan) RBD protein-1ug/ml	0.0034
	0.037037		1.5269	4.32995	1.1911	4.4481	0.022	4.1128		delta RBD protein-0.03ug/ml	0.03173
	0.111111		1.96625	4.23075	1.59915	4.11915	0.07765	4.13065		delta RBD protein-1ug/ml	0.00333
	0.333333		2.6518	4.30425	1.97115	4.3749	0.10085	4.09795		Omicron RBD protein-0.03ug/ml	0.77594
	AIN7-22AIN4-3-1ug/mL		3.0015	4.2182	2.18415	4.1499	0.1705	4.14455		Omicron RBD protein-1ug/ml	0.00683
3	2nd		Goat Anti-Human IgG (H+L)/HRP-1：5000
	Coating		Wild type (wuhan) RBD protein(40592-V08B)-0.03ug/ml	Wild type (wuhan) RBD protein(40592-V08B)-1ug/ml	delta RBD protein(40592-V08H90)-0.03ug/ml	delta RBD protein(40592-V08H90)-1ug/ml	Omicron-Spike RBD(40592-V08H121)-0.03ug/ml	Omicron-Spike RBD(40592-V08H121)-1ug/ml
	sample(ug/ml)		OD450-Blank	OD450-Blank	OD450-Blank	OD450-Blank	OD450-Blank	OD450-Blank		antibody	AIN7-22AIN4-4
	0.00137174		0.05885	1.0904	0.0631	0.99885	0.0011	0.22475		coat antibody	EC50(ug/mL)
	0.00411523		0.19715	2.8321	0.2279	2.62595	0.00335	0.44615		Wild type (wuhan) RBD protein-0.03ug/ml	0.15071
	0.0123457		0.4438	4.11045	0.52185	3.95715	-0.0006	1.1989		Wild type (wuhan) RBD protein-1ug/ml	0.00362
	0.037037		0.8873	4.24775	0.8857	4.2374	0.0034	2.7559		delta RBD protein-0.03ug/ml	0.06922
	0.111111		1.396	4.18365	1.37605	4.0836	0.0071	3.79595		delta RBD protein-1ug/ml	0.00374
	0.333333		2.0843	4.2529	1.7038	4.3591	0.0297	4.1285		Omicron RBD protein-0.03ug/ml	0.3372
	AIN7-22AIN4-4-1ug/mL		2.5547	4.2548	2.0472	4.01025	0.05235	4.11195		Omicron RBD protein-1ug/ml	0.02495
4	2nd		Goat Anti-Human IgG (H+L)/HRP-1：5000
	Coating		Wild type (wuhan) RBD protein(40592-V08B)-0.03ug/ml	Wild type (wuhan) RBD protein(40592-V08B)-1ug/ml	delta RBD protein(40592-V08H90)-0.03ug/ml	delta RBD protein(40592-V08H90)-1ug/ml	Omicron-Spike RBD(40592-V08H121)-0.03ug/ml	Omicron-Spike RBD(40592-V08H121)-1ug/ml
	sample(ug/ml)		OD450-Blank	OD450-Blank	OD450-Blank	OD450-Blank	OD450-Blank	OD450-Blank		antibody	AIN7-22AIN4-5
	0.00137174		0.0224	-0.0025	-0.00495	0.00015	0.00115	-0.00125		coat antibody	EC50(ug/mL)
	0.00411523		0.03375	0.011	-0.0023	0.0203	0.00175	-0.00035		Wild type (wuhan) RBD protein-0.03ug/ml	0.05587
	0.0123457		0.03685	0.0614	-0.0063	0.08115	0.00195	0.0033		Wild type (wuhan) RBD protein-1ug/ml	0.26076
	0.037037		0.03275	0.2195	-0.0036	0.24645	0.00065	0.01535		delta RBD protein-0.03ug/ml	0.60568
	0.111111		0.0132	0.7669	-0.0036	1.01695	0.0016	0.0402		delta RBD protein-1ug/ml	0.19189
	0.333333		0.01435	2.63255	0.0053	3.1631	0.0007	0.13505		Omicron RBD protein-0.03ug/ml	0.02154
	AIN7-22AIN4-5-1ug/mL		0.01265	3.93665	0.03175	3.99875	0.0016	0.39215		Omicron RBD protein-1ug/ml	3.14828
5	2nd		Goat Anti-Human IgG (H+L)/HRP-1：5000
	Coating		Wild type (wuhan) RBD protein(40592-V08B)-0.03ug/ml	Wild type (wuhan) RBD protein(40592-V08B)-1ug/ml	delta RBD protein(40592-V08H90)-0.03ug/ml	delta RBD protein(40592-V08H90)-1ug/ml	Omicron-Spike RBD(40592-V08H121)-0.03ug/ml	Omicron-Spike RBD(40592-V08H121)-1ug/ml
	sample(ug/ml)		OD450-Blank	OD450-Blank	OD450-Blank	OD450-Blank	OD450-Blank	OD450-Blank		antibody	AIN7-22AIN4-7
	0.00137174		0.13985	1.22145	0.1484	1.02635	0.0002	0.6911		coat antibody	EC50(ug/mL)
	0.00411523		0.4192	3.0419	0.39005	2.74525	-0.0001	1.67785		Wild type (wuhan) RBD protein-0.03ug/ml	0.03501
	0.0123457		0.95475	4.17285	0.88295	4.0895	0.00335	3.27945		Wild type (wuhan) RBD protein-1ug/ml	0.00322
	0.037037		1.7086	4.2008	1.47735	4.34955	0.0187	4.0439		delta RBD protein-0.03ug/ml	0.03604
	0.111111		2.43805	4.36345	2.07085	4.1392	0.0511	4.1241		delta RBD protein-1ug/ml	0.00361
	0.333333		2.7824	4.4171	2.4508	4.54505	0.0896	4.2395		Omicron RBD protein-0.03ug/ml	0.84814
	AIN7-22AIN4-7-1ug/mL		3.25715	4.20575	2.809	4.25315	0.1522	4.03715		Omicron RBD protein-1ug/ml	0.00618
6	2nd		Goat Anti-Human IgG (H+L)/HRP-1：5000
	Coating		Wild type (wuhan) RBD protein(40592-V08B)-0.03ug/ml	Wild type (wuhan) RBD protein(40592-V08B)-1ug/ml	delta RBD protein(40592-V08H90)-0.03ug/ml	delta RBD protein(40592-V08H90)-1ug/ml	Omicron-Spike RBD(40592-V08H121)-0.03ug/ml	Omicron-Spike RBD(40592-V08H121)-1ug/ml
	sample(ug/ml)		OD450-Blank	OD450-Blank	OD450-Blank	OD450-Blank	OD450-Blank	OD450-Blank		antibody	AIN7-22AIN4-9
	0.00137174		-0.0213	0.0958	-0.00475	0.0996	-0.0014	0.00355		coat antibody	EC50(ug/mL)
	0.00411523		-0.01635	0.32185	-0.00305	0.3352	-0.00285	0.00225		Wild type (wuhan) RBD protein-0.03ug/ml	0.03114
	0.0123457		-0.0168	0.96335	-0.00065	1.0445	-0.00115	0.0104		Wild type (wuhan) RBD protein-1ug/ml	0.03078
	0.037037		0.20595	2.36595	-0.00205	2.32295	-0.0002	0.0381		delta RBD protein-0.03ug/ml	0.83795
	0.111111		0.00525	3.9564	0.01065	3.7872	-0.0014	0.1336		delta RBD protein-1ug/ml	0.03207
	0.333333		0.05775	4.0922	0.04455	4.27205	-0.0019	0.3275		Omicron RBD protein-0.03ug/ml	0.01205
	AIN7-22AIN4-9-1ug/mL		0.14165	4.1201	0.11435	4.16495	-0.0006	0.79115		Omicron RBD protein-1ug/ml	4.04709
7	2nd		Goat Anti-Human IgG (H+L)/HRP-1：5000
	Coating		Wild type (wuhan) RBD protein(40592-V08B)-0.03ug/ml	Wild type (wuhan) RBD protein(40592-V08B)-1ug/ml	delta RBD protein(40592-V08H90)-0.03ug/ml	delta RBD protein(40592-V08H90)-1ug/ml	Omicron-Spike RBD(40592-V08H121)-0.03ug/ml	Omicron-Spike RBD(40592-V08H121)-1ug/ml
	sample(ug/ml)		OD450-Blank	OD450-Blank	OD450-Blank	OD450-Blank	OD450-Blank	OD450-Blank		antibody	AIN7-22AIN4-10
	0.00137174		0.1552	1.17375	0.03705	1.09415	-0.00375	0.065		coat antibody	EC50(ug/mL)
	0.00411523		0.11435	2.85835	0.11225	2.8709	-0.00365	0.18675		Wild type (wuhan) RBD protein-0.03ug/ml	0.16958
	0.0123457		0.32255	4.1727	0.2619	4.09105	-0.0056	0.52545		Wild type (wuhan) RBD protein-1ug/ml	0.00375
	0.037037		0.54965	4.27325	0.43105	4.3179	-0.00645	1.3168		delta RBD protein-0.03ug/ml	0.62071
	0.111111		0.87345	4.2854	0.67595	4.0508	-0.0039	2.587		delta RBD protein-1ug/ml	0.00343
	0.333333		1.15765	4.35345	0.9276	4.6315	-0.0036	3.74595		Omicron RBD protein-0.03ug/ml	0.1095
	AIN7-22AIN4-10-1ug/mL		1.5009	4.16945	1.2249	4.05255	0.00305	4.0502		Omicron RBD protein-1ug/ml	0.07618
8	2nd		Goat Anti-Human IgG (H+L)/HRP-1：5000
	Coating		Wild type (wuhan) RBD protein(40592-V08B)-0.03ug/ml	Wild type (wuhan) RBD protein(40592-V08B)-1ug/ml	delta RBD protein(40592-V08H90)-0.03ug/ml	delta RBD protein(40592-V08H90)-1ug/ml	Omicron-Spike RBD(40592-V08H121)-0.03ug/ml	Omicron-Spike RBD(40592-V08H121)-1ug/ml
	sample(ug/ml)		OD450-Blank	OD450-Blank	OD450-Blank	OD450-Blank	OD450-Blank	OD450-Blank		antibody	AIN7-22AIN4-11
	0.00137174		0.02165	0.7892	0.0153	0.67625	0.0008	0.05685		coat antibody	EC50(ug/mL)
	0.00411523		0.0804	2.14495	0.08015	1.89645	-0.00455	0.1819		Wild type (wuhan) RBD protein-0.03ug/ml	1.33005
	0.0123457		0.22205	3.91795	0.18895	3.79715	-0.00615	0.49035		Wild type (wuhan) RBD protein-1ug/ml	0.00462
	0.037037		0.44055	4.2252	0.36395	4.26995	-0.0009	1.22275		delta RBD protein-0.03ug/ml	0.4469
	0.111111		0.6776	4.08225	0.5551	4.0362	-0.0047	2.70155		delta RBD protein-1ug/ml	0.00507
	0.333333		0.9582	4.233	0.76865	4.2878	0.0023	3.8598		Omicron RBD protein-0.03ug/ml	3.9242e-09
	AIN7-22AIN4-11-1ug/mL		1.42645	4.1348	1.017	4.05635	0.00275	4.08165		Omicron RBD protein-1ug/ml	0.0743
9	2nd		Goat Anti-Human IgG (H+L)/HRP-1：5000
	Coating		Wild type (wuhan) RBD protein(40592-V08B)-0.03ug/ml	Wild type (wuhan) RBD protein(40592-V08B)-1ug/ml	delta RBD protein(40592-V08H90)-0.03ug/ml	delta RBD protein(40592-V08H90)-1ug/ml	Omicron-Spike RBD(40592-V08H121)-0.03ug/ml	Omicron-Spike RBD(40592-V08H121)-1ug/ml
	sample(ug/ml)		OD450-Blank	OD450-Blank	OD450-Blank	OD450-Blank	OD450-Blank	OD450-Blank		antibody	AIN7-22AIN4-15
	0.00137174		-0.00025	0.0038	-0.0019	0.0011	-0.00035	-0.0014		coat antibody	EC50(ug/mL)
	0.00411523		-0.00285	0.0116	0.0026	0.0052	-0.00045	-0.00035		Wild type (wuhan) RBD protein-0.03ug/ml	1.05186
	0.0123457		0.03725	0.00445	-0.0008	-0.00045	0.00055	-0.00165		Wild type (wuhan) RBD protein-1ug/ml	0.39204
	0.037037		0.00185	0.0016	0.00175	0.0002	-0.00125	0.0023		delta RBD protein-0.03ug/ml	6.22071
	0.111111		0.0131	0.00185	0.02225	0.0004	-0.0006	0.00465		delta RBD protein-1ug/ml	0.37863
	0.333333		0.0059	0.01885	0.00675	0.01725	0.003	0.01725		Omicron RBD protein-0.03ug/ml	0.19715
	AIN7-22AIN4-15-1ug/mL		0.0781	0.0789	0.05885	0.0628	0.0003	0.0673		Omicron RBD protein-1ug/ml	39.3495
10	2nd		Goat Anti-Human IgG (H+L)/HRP-1：5000
	Coating		Wild type (wuhan) RBD protein(40592-V08B)-0.03ug/ml	Wild type (wuhan) RBD protein(40592-V08B)-1ug/ml	delta RBD protein(40592-V08H90)-0.03ug/ml	delta RBD protein(40592-V08H90)-1ug/ml	Omicron-Spike RBD(40592-V08H121)-0.03ug/ml	Omicron-Spike RBD(40592-V08H121)-1ug/ml
	sample(ug/ml)		OD450-Blank	OD450-Blank	OD450-Blank	OD450-Blank	OD450-Blank	OD450-Blank		antibody	AIN7-22AIN4-16
	0.00137174		0.02475	0.75125	0.02265	0.68525	-0.00185	0.14115		coat antibody	EC50(ug/mL)
	0.00411523		0.0862	1.93605	0.07955	1.92	0.0008	0.46135		Wild type (wuhan) RBD protein-0.03ug/ml	0.19208
	0.0123457		0.2673	3.8326	0.20265	3.85135	-0.0025	1.1388		Wild type (wuhan) RBD protein-1ug/ml	0.00527
	0.037037		0.58595	4.18055	0.48375	4.24925	0.00225	2.5704		delta RBD protein-0.03ug/ml	2.22964
	0.111111		0.9172	4.40735	0.6506	4.2273	0.00405	3.8266		delta RBD protein-1ug/ml	0.00514
	0.333333		1.30945	4.27045	1.01605	4.35895	0.0229	4.1476		Omicron RBD protein-0.03ug/ml	0.50845
	AIN7-22AIN4-16-1ug/mL		1.69185	4.32055	1.659	4.2241	0.05155	4.08715		Omicron RBD protein-1ug/ml	0.02712
11	2nd		Goat Anti-Human IgG (H+L)/HRP-1：5000
	Coating		Wild type (wuhan) RBD protein(40592-V08B)-0.03ug/ml	Wild type (wuhan) RBD protein(40592-V08B)-1ug/ml	delta RBD protein(40592-V08H90)-0.03ug/ml	delta RBD protein(40592-V08H90)-1ug/ml	Omicron-Spike RBD(40592-V08H121)-0.03ug/ml	Omicron-Spike RBD(40592-V08H121)-1ug/ml
	sample(ug/ml)		OD450-Blank	OD450-Blank	OD450-Blank	OD450-Blank	OD450-Blank	OD450-Blank		antibody	AIN7-22AIN4-17
	0.00137174		0.00155	0.27	-0.0006	0.22975	-0.00965	-0.0017		coat antibody	EC50(ug/mL)
	0.00411523		0.00115	0.7697	-0.00175	0.7585	-0.0039	-0.00155		Wild type (wuhan) RBD protein-0.03ug/ml	3.45357
	0.0123457		0.0186	2.11235	-0.0008	1.78065	-0.00955	-0.00155		Wild type (wuhan) RBD protein-1ug/ml	0.01257
	0.037037		0.0111	3.6456	0.001	3.47945	-0.00975	0.00565		delta RBD protein-0.03ug/ml	1.24946
	0.111111		0.0283	4.05545	0.01175	4.06225	-0.0074	0.0396		delta RBD protein-1ug/ml	0.0156
	0.333333		0.05475	4.1624	0.04025	4.2323	-0.00495	0.14815		Omicron RBD protein-0.03ug/ml	0.46224
	AIN7-22AIN4-17-1ug/mL		0.14235	4.08675	0.1062	4.1667	-5e-05	0.37965		Omicron RBD protein-1ug/ml	0.8692
12	2nd		Goat Anti-Human IgG (H+L)/HRP-1：5000
	Coating		Wild type (wuhan) RBD protein(40592-V08B)-0.03ug/ml	Wild type (wuhan) RBD protein(40592-V08B)-1ug/ml	delta RBD protein(40592-V08H90)-0.03ug/ml	delta RBD protein(40592-V08H90)-1ug/ml	Omicron-Spike RBD(40592-V08H121)-0.03ug/ml	Omicron-Spike RBD(40592-V08H121)-1ug/ml
	sample(ug/ml)		OD450-Blank	OD450-Blank	OD450-Blank	OD450-Blank	OD450-Blank	OD450-Blank		antibody	AIN7-22AIN4-18
	0.00137174		0.0284	1.0002	0.04345	0.88555	0.0011	0.19815		coat antibody	EC50(ug/mL)
	0.00411523		0.14015	2.8352	0.1678	2.62445	0.00515	0.541		Wild type (wuhan) RBD protein-0.03ug/ml	0.07441
	0.0123457		0.3677	4.19615	0.3742	4.04825	0.00015	1.31065		Wild type (wuhan) RBD protein-1ug/ml	0.00368
	0.037037		0.71025	4.273	0.6496	4.32855	0.0009	2.9951		delta RBD protein-0.03ug/ml	0.06413
	0.111111		1.08265	4.337	1.01655	4.14755	0.0051	4.05595		delta RBD protein-1ug/ml	0.00377
	0.333333		1.4273	4.20745	1.3287	4.37065	0.0198	4.21975		Omicron RBD protein-0.03ug/ml	0.37928
	AIN7-22AIN4-18-1ug/mL		1.6897	4.36045	1.51235	4.1191	0.0387	4.05325		Omicron RBD protein-1ug/ml	0.02198
13	2nd		Goat Anti-Human IgG (H+L)/HRP-1：5000
	Coating		Wild type (wuhan) RBD protein(40592-V08B)-0.03ug/ml	Wild type (wuhan) RBD protein(40592-V08B)-1ug/ml	delta RBD protein(40592-V08H90)-0.03ug/ml	delta RBD protein(40592-V08H90)-1ug/ml	Omicron-Spike RBD(40592-V08H121)-0.03ug/ml	Omicron-Spike RBD(40592-V08H121)-1ug/ml
	sample(ug/ml)		OD450-Blank	OD450-Blank	OD450-Blank	OD450-Blank	OD450-Blank	OD450-Blank		antibody	AIN7-22AIN4-19
	0.00137174		-0.0026	0.49265	-0.0047	0.4018	-0.0031	-0.0017		coat antibody	EC50(ug/mL)
	0.00411523		-0.00165	1.10515	-0.00545	1.04895	-0.003	0.00725		Wild type (wuhan) RBD protein-0.03ug/ml	3.56408
	0.0123457		0.00335	2.64435	-0.00455	2.29565	-0.0003	0.01865		Wild type (wuhan) RBD protein-1ug/ml	0.00993
	0.037037		0.01535	3.96995	0.0075	4.0428	-0.00255	0.07765		delta RBD protein-0.03ug/ml	0.90415
	0.111111		0.04545	4.23985	0.02615	4.1468	0.0015	0.227		delta RBD protein-1ug/ml	0.01184
	0.333333		0.08955	4.19705	0.0719	4.15635	-0.00185	0.5015		Omicron RBD protein-0.03ug/ml	1.44379
	AIN7-22AIN4-19-1ug/mL		0.2058	4.09405	0.14245	4.0822	0.00345	0.92965		Omicron RBD protein-1ug/ml	0.89542
14	2nd		Goat Anti-Human IgG (H+L)/HRP-1：5000
	Coating		Wild type (wuhan) RBD protein(40592-V08B)-0.03ug/ml	Wild type (wuhan) RBD protein(40592-V08B)-1ug/ml	delta RBD protein(40592-V08H90)-0.03ug/ml	delta RBD protein(40592-V08H90)-1ug/ml	Omicron-Spike RBD(40592-V08H121)-0.03ug/ml	Omicron-Spike RBD(40592-V08H121)-1ug/ml
	sample(ug/ml)		OD450-Blank	OD450-Blank	OD450-Blank	OD450-Blank	OD450-Blank	OD450-Blank		antibody	AIN7-AIN1-1
	0.00137174		-0.0021	0.002	-0.00185	0.0102	0.0007	-0.01615		coat antibody	EC50(ug/mL)
	0.00411523		-0.00505	0.03015	-0.00045	0.0523	-0.00185	-0.02085		Wild type (wuhan) RBD protein-0.03ug/ml	22.6894
	0.0123457		-0.00365	0.127	-0.00395	0.15975	0.00245	-0.0361		Wild type (wuhan) RBD protein-1ug/ml	0.2496
	0.037037		0.00225	0.43285	-0.00225	0.5255	0.00075	-0.0332		delta RBD protein-0.03ug/ml	0.41277
	0.111111		-0.0021	1.18455	-0.00155	1.5835	-0.0004	-0.0252		delta RBD protein-1ug/ml	0.13865
	0.333333		0.0024	2.9235	0.0158	3.776	0.002	0.0506		Omicron RBD protein-0.03ug/ml	0.37418
	AIN7-AIN1-1-1ug/mL		0.0186	4.18795	0.0516	4.07265	0.0072	0.24725		Omicron RBD protein-1ug/ml	1.07674
15	2nd		Goat Anti-Human IgG (H+L)/HRP-1：5000
	Coating		Wild type (wuhan) RBD protein(40592-V08B)-0.03ug/ml	Wild type (wuhan) RBD protein(40592-V08B)-1ug/ml	delta RBD protein(40592-V08H90)-0.03ug/ml	delta RBD protein(40592-V08H90)-1ug/ml	Omicron-Spike RBD(40592-V08H121)-0.03ug/ml	Omicron-Spike RBD(40592-V08H121)-1ug/ml
	sample(ug/ml)		OD450-Blank	OD450-Blank	OD450-Blank	OD450-Blank	OD450-Blank	OD450-Blank		antibody	AIN7-AIN1-2
	0.00137174		-0.01445	0.62625	-0.00315	0.6862	-5e-05	0.0041		coat antibody	EC50(ug/mL)
	0.00411523		-0.01635	2.1989	0.01705	2.38675	-0.00085	0.0383		Wild type (wuhan) RBD protein-0.03ug/ml	2.37462
	0.0123457		-0.00705	3.8859	0.0219	3.9207	-0.0006	0.109		Wild type (wuhan) RBD protein-1ug/ml	0.00425
	0.037037		0.00975	4.1295	0.07835	4.27545	-0.0011	0.29435		delta RBD protein-0.03ug/ml	2.15206
	0.111111		0.0417	4.12955	0.17935	4.07545	-0.0011	0.6441		delta RBD protein-1ug/ml	0.00393
	0.333333		0.08895	4.1853	0.31195	4.28065	-0.00115	1.78075		Omicron RBD protein-0.03ug/ml	0.05989
	AIN7-AIN1-2-1ug/mL		0.17795	4.2274	0.56	4.17215	-5e-05	2.9952		Omicron RBD protein-1ug/ml	0.41157
16	2nd		Goat Anti-Human IgG (H+L)/HRP-1：5000
	Coating		Wild type (wuhan) RBD protein(40592-V08B)-0.03ug/ml	Wild type (wuhan) RBD protein(40592-V08B)-1ug/ml	delta RBD protein(40592-V08H90)-0.03ug/ml	delta RBD protein(40592-V08H90)-1ug/ml	Omicron-Spike RBD(40592-V08H121)-0.03ug/ml	Omicron-Spike RBD(40592-V08H121)-1ug/ml
	sample(ug/ml)		OD450-Blank	OD450-Blank	OD450-Blank	OD450-Blank	OD450-Blank	OD450-Blank		antibody	AIN7-AIN1-4
	0.00137174		0.00015	0.30925	-0.00225	0.4849	-0.00205	0.00035		coat antibody	EC50(ug/mL)
	0.00411523		-0.00595	0.9874	0.02045	1.4685	-0.00365	0.0154		Wild type (wuhan) RBD protein-0.03ug/ml	3.11807
	0.0123457		0.00155	2.70665	0.00335	3.55215	-0.00515	0.0498		Wild type (wuhan) RBD protein-1ug/ml	0.00917
	0.037037		0.00765	4.10375	0.0186	4.1754	-0.0035	0.1457		delta RBD protein-0.03ug/ml	1.34878
	0.111111		0.0357	4.1158	0.0575	4.07035	-0.00405	0.4069		delta RBD protein-1ug/ml	0.006
	0.333333		0.06145	4.08255	0.1519	4.19065	-0.00365	1.0711		Omicron RBD protein-0.03ug/ml	1.04219
	AIN7-AIN1-4-1ug/mL		0.1329	4.1467	0.3528	4.06435	0.0032	2.0357		Omicron RBD protein-1ug/ml	0.66223
17	2nd		Goat Anti-Human IgG (H+L)/HRP-1：5000
	Coating		Wild type (wuhan) RBD protein(40592-V08B)-0.03ug/ml	Wild type (wuhan) RBD protein(40592-V08B)-1ug/ml	delta RBD protein(40592-V08H90)-0.03ug/ml	delta RBD protein(40592-V08H90)-1ug/ml	Omicron-Spike RBD(40592-V08H121)-0.03ug/ml	Omicron-Spike RBD(40592-V08H121)-1ug/ml
	sample(ug/ml)		OD450-Blank	OD450-Blank	OD450-Blank	OD450-Blank	OD450-Blank	OD450-Blank		antibody	AIN7-AIN1-7
	0.00137174		0.00195	0.0116	0.0053	0.00955	0.00025	-0.0108		coat antibody	EC50(ug/mL)
	0.00411523		-0.00645	0.0554	-0.0023	0.07295	0.0022	-0.00855		Wild type (wuhan) RBD protein-0.03ug/ml	0.5901
	0.0123457		-0.0023	0.1997	0	0.2648	-0.0002	-0.0053		Wild type (wuhan) RBD protein-1ug/ml	0.16208
	0.037037		-0.00665	0.59965	-0.0026	0.87405	-0.00035	0.00985		delta RBD protein-0.03ug/ml	0.35394
	0.111111		-0.0025	1.4795	-0.00445	2.39025	0.003	0.06595		delta RBD protein-1ug/ml	0.09632
	0.333333		0.00055	3.31395	0.02495	4.10655	0.0003	0.2454		Omicron RBD protein-0.03ug/ml	0.96995
	AIN7-AIN1-7-1ug/mL		0.0248	3.99185	0.07265	4.2166	0.02695	0.6745		Omicron RBD protein-1ug/ml	1.4485
18	2nd		Goat Anti-Human IgG (H+L)/HRP-1：5000
	Coating		Wild type (wuhan) RBD protein(40592-V08B)-0.03ug/ml	Wild type (wuhan) RBD protein(40592-V08B)-1ug/ml	delta RBD protein(40592-V08H90)-0.03ug/ml	delta RBD protein(40592-V08H90)-1ug/ml	Omicron-Spike RBD(40592-V08H121)-0.03ug/ml	Omicron-Spike RBD(40592-V08H121)-1ug/ml
	sample(ug/ml)		OD450-Blank	OD450-Blank	OD450-Blank	OD450-Blank	OD450-Blank	OD450-Blank		antibody	AIN7-AIN1-8
	0.00137174		-0.0004	0.5781	-0.004	0.69055	-0.00315	0.0003		coat antibody	EC50(ug/mL)
	0.00411523		0.0006	1.9732	0.0172	2.2587	-0.0014	0.1948		Wild type (wuhan) RBD protein-0.03ug/ml	0.45646
	0.0123457		0.0008	3.77505	0.03455	3.9691	-0.00245	0.0095		Wild type (wuhan) RBD protein-1ug/ml	0.00481
	0.037037		0.0208	4.21625	0.1079	4.35955	-0.0024	0.03325		delta RBD protein-0.03ug/ml	0.11439
	0.111111		0.0561	4.27065	0.2312	4.08625	0.0029	0.13255		delta RBD protein-1ug/ml	0.00431
	0.333333		0.10535	4.3642	0.33565	4.3213	0.0072	0.32975		Omicron RBD protein-0.03ug/ml	0.11626
	AIN7-AIN1-8-1ug/mL		0.16955	4.26075	0.41645	4.20245	0.001	0.847		Omicron RBD protein-1ug/ml	0.74115
19	2nd		Goat Anti-Human IgG (H+L)/HRP-1：5000
	Coating		Wild type (wuhan) RBD protein(40592-V08B)-0.03ug/ml	Wild type (wuhan) RBD protein(40592-V08B)-1ug/ml	delta RBD protein(40592-V08H90)-0.03ug/ml	delta RBD protein(40592-V08H90)-1ug/ml	Omicron-Spike RBD(40592-V08H121)-0.03ug/ml	Omicron-Spike RBD(40592-V08H121)-1ug/ml
	sample(ug/ml)		OD450-Blank	OD450-Blank	OD450-Blank	OD450-Blank	OD450-Blank	OD450-Blank		antibody	AIN7-AIN1-9
	0.00137174		-0.00285	0.0092	-0.0045	0.01535	-0.00035	-0.00585		coat antibody	EC50(ug/mL)
	0.00411523		-0.01175	0.0375	0.0045	0.04165	-0.00015	0.00385		Wild type (wuhan) RBD protein-0.03ug/ml	1.49682
	0.0123457		-0.0171	0.1271	-0.0042	0.1283	0.00345	-0.00465		Wild type (wuhan) RBD protein-1ug/ml	0.24059
	0.037037		-0.01635	0.40625	0.002	0.421	-0.00015	-0.0031		delta RBD protein-0.03ug/ml	0.38198
	0.111111		0.0122	1.1883	0.00015	1.19775	-0.00265	-0.00235		delta RBD protein-1ug/ml	0.21867
	0.333333		0.05165	2.90515	0.02955	3.00765	-0.0008	0.02685		Omicron RBD protein-0.03ug/ml	4.262e-08
	AIN7-AIN1-9-1ug/mL		0.17555	4.12285	0.078	4.1079	0.00095	0.086		Omicron RBD protein-1ug/ml	0.37611
20	2nd		Goat Anti-Human IgG (H+L)/HRP-1：5000
	Coating		Wild type (wuhan) RBD protein(40592-V08B)-0.03ug/ml	Wild type (wuhan) RBD protein(40592-V08B)-1ug/ml	delta RBD protein(40592-V08H90)-0.03ug/ml	delta RBD protein(40592-V08H90)-1ug/ml	Omicron-Spike RBD(40592-V08H121)-0.03ug/ml	Omicron-Spike RBD(40592-V08H121)-1ug/ml
	sample(ug/ml)		OD450-Blank	OD450-Blank	OD450-Blank	OD450-Blank	OD450-Blank	OD450-Blank		antibody	AIN7-AIN1-10
	0.00137174		-0.0035	0.66805	-0.00075	0.6146	0.0035	0.03305		coat antibody	EC50(ug/mL)
	0.00411523		0.0171	1.8865	0.0046	1.7115	0.0018	0.0877		Wild type (wuhan) RBD protein-0.03ug/ml	1.09301
	0.0123457		0.0618	3.70675	0.02765	3.5003	-0.00135	0.21235		Wild type (wuhan) RBD protein-1ug/ml	0.00519
	0.037037		0.16245	4.30035	0.0804	4.1872	-0.00105	0.5662		delta RBD protein-0.03ug/ml	0.38504
	0.111111		0.30775	4.14475	0.16435	4.13185	0.00135	1.38075		delta RBD protein-1ug/ml	0.00569
	0.333333		0.46515	4.14125	0.30485	4.2417	-0.00065	2.6158		Omicron RBD protein-0.03ug/ml	0.00165
	AIN7-AIN1-10-1ug/mL		0.71625	4.22375	0.44575	4.06615	0	3.7536		Omicron RBD protein-1ug/ml	0.27716
21	2nd		Goat Anti-Human IgG (H+L)/HRP-1：5000
	Coating		Wild type (wuhan) RBD protein(40592-V08B)-0.03ug/ml	Wild type (wuhan) RBD protein(40592-V08B)-1ug/ml	delta RBD protein(40592-V08H90)-0.03ug/ml	delta RBD protein(40592-V08H90)-1ug/ml	Omicron-Spike RBD(40592-V08H121)-0.03ug/ml	Omicron-Spike RBD(40592-V08H121)-1ug/ml
	sample(ug/ml)		OD450-Blank	OD450-Blank	OD450-Blank	OD450-Blank	OD450-Blank	OD450-Blank		antibody	AIN7-AIN1-11
	0.00137174		0.57065	1.02265	0.045	0.90645	-0.00195	0.3072		coat antibody	EC50(ug/mL)
	0.00411523		0.2427	2.7055	0.1369	2.5439	0.0004	0.84		Wild type (wuhan) RBD protein-0.03ug/ml	0.09163
	0.0123457		0.5969	4.2476	0.32055	3.99705	-0.0007	1.9567		Wild type (wuhan) RBD protein-1ug/ml	0.004
	0.037037		1.14715	4.23815	0.67905	4.24335	0.0087	3.7307		delta RBD protein-0.03ug/ml	0.41695
	0.111111		1.8463	4.24065	1.09405	4.15805	0.0267	4.11855		delta RBD protein-1ug/ml	0.00386
	0.333333		2.31155	4.2602	1.4686	4.4469	0.0497	4.17535		Omicron RBD protein-0.03ug/ml	3.52152
	AIN7-AIN1-11-1ug/mL		2.8406	4.32425	2.01575	4.15875	0.11075	4.0573		Omicron RBD protein-1ug/ml	0.01398
22	2nd		Goat Anti-Human IgG (H+L)/HRP-1：5000
	Coating		Wild type (wuhan) RBD protein(40592-V08B)-0.03ug/ml	Wild type (wuhan) RBD protein(40592-V08B)-1ug/ml	delta RBD protein(40592-V08H90)-0.03ug/ml	delta RBD protein(40592-V08H90)-1ug/ml	Omicron-Spike RBD(40592-V08H121)-0.03ug/ml	Omicron-Spike RBD(40592-V08H121)-1ug/ml
	sample(ug/ml)		OD450-Blank	OD450-Blank	OD450-Blank	OD450-Blank	OD450-Blank	OD450-Blank		antibody	AIN7-AIN1-12
	0.00137174		0.00795	0.0008	-0.00325	0.002	0.00285	0.0088		coat antibody	EC50(ug/mL)
	0.00411523		0.0086	0.0265	-0.0024	0.022	0.00185	-0.00155		Wild type (wuhan) RBD protein-0.03ug/ml	0.43974
	0.0123457		0.01025	0.0957	0.003	0.07795	0.00305	0.00045		Wild type (wuhan) RBD protein-1ug/ml	0.30865
	0.037037		0.0086	0.29885	-0.00245	0.26435	-0.0032	0.002		delta RBD protein-0.03ug/ml	4.18942
	0.111111		0.00395	0.85305	0.02525	0.8104	-0.0021	0.01395		delta RBD protein-1ug/ml	0.32639
	0.333333		0.00995	2.5682	0.00375	2.5148	0.00575	0.0496		Omicron RBD protein-0.03ug/ml	0.3019
	AIN7-AIN1-12-1ug/mL		0.05625	4.0844	0.05445	4.12755	0.00645	0.19495		Omicron RBD protein-1ug/ml	2.8394
23	2nd		Goat Anti-Human IgG (H+L)/HRP-1：5000
	Coating		Wild type (wuhan) RBD protein(40592-V08B)-0.03ug/ml	Wild type (wuhan) RBD protein(40592-V08B)-1ug/ml	delta RBD protein(40592-V08H90)-0.03ug/ml	delta RBD protein(40592-V08H90)-1ug/ml	Omicron-Spike RBD(40592-V08H121)-0.03ug/ml	Omicron-Spike RBD(40592-V08H121)-1ug/ml
	sample(ug/ml)		OD450-Blank	OD450-Blank	OD450-Blank	OD450-Blank	OD450-Blank	OD450-Blank		antibody	AIN7-AIN1-14
	0.00137174		0.1035	1.36775	0.02995	1.1712	-0.00605	0.3633		coat antibody	EC50(ug/mL)
	0.00411523		0.29315	3.5051	0.3341	3.37745	-0.00695	0.8974		Wild type (wuhan) RBD protein-0.03ug/ml	0.04545
	0.0123457		0.6801	4.23765	0.4512	4.0491	-0.0084	1.9556		Wild type (wuhan) RBD protein-1ug/ml	0.00208
	0.037037		1.2325	4.39365	0.8396	4.4586	-0.0038	3.39425		delta RBD protein-0.03ug/ml	0.29671
	0.111111		1.76655	4.2197	1.2431	4.1252	0.00215	4.08885		delta RBD protein-1ug/ml	0.00143
	0.333333		2.22385	4.44615	1.6985	4.44695	0.0234	4.2976		Omicron RBD protein-0.03ug/ml	0.40694
	AIN7-AIN1-14-1ug/mL		2.49115	4.3534	2.11735	4.1472	0.04845	4.2256		Omicron RBD protein-1ug/ml	0.0152
24	2nd		Goat Anti-Human IgG (H+L)/HRP-1：5000
	Coating		Wild type (wuhan) RBD protein(40592-V08B)-0.03ug/ml	Wild type (wuhan) RBD protein(40592-V08B)-1ug/ml	delta RBD protein(40592-V08H90)-0.03ug/ml	delta RBD protein(40592-V08H90)-1ug/ml	Omicron-Spike RBD(40592-V08H121)-0.03ug/ml	Omicron-Spike RBD(40592-V08H121)-1ug/ml
	sample(ug/ml)		OD450-Blank	OD450-Blank	OD450-Blank	OD450-Blank	OD450-Blank	OD450-Blank		antibody	AIN7-AIN1-16
	0.00137174		-0.0009	0.0035	-0.00785	0.03845	-0.00195	-0.00085		coat antibody	EC50(ug/mL)
	0.00411523		-0.00265	-0.00925	-0.0179	0.0532	-5e-05	0.0556		Wild type (wuhan) RBD protein-0.03ug/ml	0.3734
	0.0123457		0.0001	0.01315	-0.0129	0.0733	-0.0025	-0.0028		Wild type (wuhan) RBD protein-1ug/ml	8.55689
	0.037037		-0.00385	0.1152	-0.00525	0.14055	0.00465	0.0244		delta RBD protein-0.03ug/ml	0.04139
	0.111111		0.0087	0.32095	0.0441	0.3789	0.03185	0.0551		delta RBD protein-1ug/ml	14.5264
	0.333333		0.03985	0.8856	0.03345	0.95915	0.04025	0.11035		Omicron RBD protein-0.03ug/ml	0.07094
	AIN7-AIN1-16-1ug/mL		0.078	2.3831	0.03805	2.5534	0.0423	0.1957		Omicron RBD protein-1ug/ml	0.50791
25	2nd		Goat Anti-Human IgG (H+L)/HRP-1：5000
	Coating		Wild type (wuhan) RBD protein(40592-V08B)-0.03ug/ml	Wild type (wuhan) RBD protein(40592-V08B)-1ug/ml	delta RBD protein(40592-V08H90)-0.03ug/ml	delta RBD protein(40592-V08H90)-1ug/ml	Omicron-Spike RBD(40592-V08H121)-0.03ug/ml	Omicron-Spike RBD(40592-V08H121)-1ug/ml
	sample(ug/ml)		OD450-Blank	OD450-Blank	OD450-Blank	OD450-Blank	OD450-Blank	OD450-Blank		antibody	AIN7-AIN1-17
	0.00137174		-0.0055	0.8236	-0.0063	0.84	-0.00075	0.0201		coat antibody	EC50(ug/mL)
	0.00411523		-0.00755	2.32395	0.00085	2.3154	0.005	0.0534		Wild type (wuhan) RBD protein-0.03ug/ml	0.48326
	0.0123457		0.0005	3.99895	0.0249	4.14425	-0.0021	0.14075		Wild type (wuhan) RBD protein-1ug/ml	0.00429
	0.037037		0.02175	4.2493	0.09115	4.19975	0.0001	0.4109		delta RBD protein-0.03ug/ml	3.1605
	0.111111		0.08755	4.0895	0.14325	4.1218	-0.00085	1.1318		delta RBD protein-1ug/ml	0.00429
	0.333333		0.13915	4.1054	0.2094	4.1738	0.00655	2.52505		Omicron RBD protein-0.03ug/ml	0.18539
	AIN7-AIN1-17-1ug/mL		0.2298	4.1472	0.4189	4.13355	0.0048	3.7689		Omicron RBD protein-1ug/ml	0.29207
26	2nd		Goat Anti-Human IgG (H+L)/HRP-1：5000
	Coating		Wild type (wuhan) RBD protein(40592-V08B)-0.03ug/ml	Wild type (wuhan) RBD protein(40592-V08B)-1ug/ml	delta RBD protein(40592-V08H90)-0.03ug/ml	delta RBD protein(40592-V08H90)-1ug/ml	Omicron-Spike RBD(40592-V08H121)-0.03ug/ml	Omicron-Spike RBD(40592-V08H121)-1ug/ml
	sample(ug/ml)		OD450-Blank	OD450-Blank	OD450-Blank	OD450-Blank	OD450-Blank	OD450-Blank		antibody	AIN7-AIN1-18
	0.00137174		-0.00775	0.0062	0.00155	-0.01375	-0.00865	-0.00225		coat antibody	EC50(ug/mL)
	0.00411523		-0.0056	0.01475	-0.0006	0.0127	-0.0061	-0.0045		Wild type (wuhan) RBD protein-0.03ug/ml	0.02089
	0.0123457		-0.00645	0.0553	-0.00245	0.05055	-0.00915	-0.0012		Wild type (wuhan) RBD protein-1ug/ml	1.48465
	0.037037		-0.0037	0.2589	-0.00615	0.2577	-0.0097	-0.00065		delta RBD protein-0.03ug/ml	0.01323
	0.111111		-0.0033	0.6442	-0.00495	0.6471	-0.001	0.0012		delta RBD protein-1ug/ml	0.80669
	0.333333		0.00245	1.70445	-0.00895	1.89655	-0.00565	0.0178		Omicron RBD protein-0.03ug/ml	0.08102
	AIN7-AIN1-18-1ug/mL		0.0048	3.654	0.003	3.89875	0.00125	0.0699		Omicron RBD protein-1ug/ml	1.3981
27	2nd		Goat Anti-Human IgG (H+L)/HRP-1：5000
	Coating		Wild type (wuhan) RBD protein(40592-V08B)-0.03ug/ml	Wild type (wuhan) RBD protein(40592-V08B)-1ug/ml	delta RBD protein(40592-V08H90)-0.03ug/ml	delta RBD protein(40592-V08H90)-1ug/ml	Omicron-Spike RBD(40592-V08H121)-0.03ug/ml	Omicron-Spike RBD(40592-V08H121)-1ug/ml
	sample(ug/ml)		OD450-Blank	OD450-Blank	OD450-Blank	OD450-Blank	OD450-Blank	OD450-Blank		antibody	AIN7-AIN1-19
	0.00137174		-0.0025	-0.00755	-0.0227	0.0892	-0.00285	-0.0128		coat antibody	EC50(ug/mL)
	0.00411523		-0.0116	0.0146	-0.02845	0.04885	-0.00495	-0.00585		Wild type (wuhan) RBD protein-0.03ug/ml	13.8592
	0.0123457		0.08565	0.2513	0.0472	0.386	-0.00325	-0.01225		Wild type (wuhan) RBD protein-1ug/ml	0.16214
	0.037037		0.02565	0.62835	0.0433	0.59085	-0.00515	-0.00695		delta RBD protein-0.03ug/ml	0.00722
	0.111111		0.0287	1.54725	0.0186	1.46285	-0.0011	-0.0059		delta RBD protein-1ug/ml	0.18083
	0.333333		0.08135	3.2755	0.0241	3.29545	-0.00315	0.003		Omicron RBD protein-0.03ug/ml	0.01651
	AIN7-AIN1-19-1ug/mL		0.1435	3.99215	0.04	4.1214	0.00025	0.03655		Omicron RBD protein-1ug/ml	0.83373
28	2nd		Goat Anti-Human IgG (H+L)/HRP-1：5000
	Coating		Wild type (wuhan) RBD protein(40592-V08B)-0.03ug/ml	Wild type (wuhan) RBD protein(40592-V08B)-1ug/ml	delta RBD protein(40592-V08H90)-0.03ug/ml	delta RBD protein(40592-V08H90)-1ug/ml	Omicron-Spike RBD(40592-V08H121)-0.03ug/ml	Omicron-Spike RBD(40592-V08H121)-1ug/ml		antibody	AIN7-AIN1-21
	sample(ug/ml)		OD450-Blank	OD450-Blank	OD450-Blank	OD450-Blank	OD450-Blank	OD450-Blank		coat antibody	EC50(ug/mL)
	0.00137174		-0.00405	0.009	-0.01145	0.0012	0.0075	-0.0017		Wild type (wuhan) RBD protein-0.03ug/ml	0.0047
	0.00411523		-0.004	0.0968	0.00995	0.011	0.00275	0.00095		Wild type (wuhan) RBD protein-1ug/ml	0.6062
	0.0123457		-0.001	0.04645	-0.01355	0.042	-0.00035	-0.002		delta RBD protein-0.03ug/ml	0.37735
	0.037037		-0.00405	0.12835	-0.01325	0.13565	-0.0006	-0.0006		delta RBD protein-1ug/ml	0.73148
	0.111111		-0.0027	0.41695	-0.01315	0.42245	0.0018	0.0029		Omicron RBD protein-0.03ug/ml	0.00393
	0.333333		0.0015	1.3914	-0.0113	1.5331	-0.00255	0.0035		Omicron RBD protein-1ug/ml	4.25561
	AIN7-AIN1-21-1ug/mL		0.0046	3.05175	-0.00795	3.60865	0.00245	0.01215
29	2nd		Goat Anti-Human IgG (H+L)/HRP-1：5000
	Coating		Wild type (wuhan) RBD protein(40592-V08B)-0.03ug/ml	Wild type (wuhan) RBD protein(40592-V08B)-1ug/ml	delta RBD protein(40592-V08H90)-0.03ug/ml	delta RBD protein(40592-V08H90)-1ug/ml	Omicron-Spike RBD(40592-V08H121)-0.03ug/ml	Omicron-Spike RBD(40592-V08H121)-1ug/ml
	sample(ug/ml)		OD450-Blank	OD450-Blank	OD450-Blank	OD450-Blank	OD450-Blank	OD450-Blank		antibody	AIN7-AIN1-22
	0.00137174		0.00325	-0.00575	-0.0204	0.00075	-0.0002	-0.00135		coat antibody	EC50(ug/mL)
	0.00411523		-0.00425	0.0009	-0.0166	0.00815	-0.00385	-0.00025		Wild type (wuhan) RBD protein-0.03ug/ml	0.66236
	0.0123457		-0.01005	0.05915	-0.0211	0.0485	-0.00475	-0.0055		Wild type (wuhan) RBD protein-1ug/ml	0.70212
	0.037037		-0.0067	0.1694	-0.0127	0.2007	-0.0042	-0.0076		delta RBD protein-0.03ug/ml	3.33353
	0.111111		-0.0032	0.6503	-0.0185	0.67355	-0.0015	0.00085		delta RBD protein-1ug/ml	0.60024
	0.333333		-0.0048	1.84445	-0.0175	1.99865	-0.00335	-0.00165		Omicron RBD protein-0.03ug/ml	0.00153
	AIN7-AIN1-22-1ug/mL		0.01175	3.7932	-0.0029	3.99035	-0.0057	0.01575		Omicron RBD protein-1ug/ml	0.00153
30	2nd		Goat Anti-Human IgG (H+L)/HRP-1：5000
	Coating		Wild type (wuhan) RBD protein(40592-V08B)-0.03ug/ml	Wild type (wuhan) RBD protein(40592-V08B)-1ug/ml	delta RBD protein(40592-V08H90)-0.03ug/ml	delta RBD protein(40592-V08H90)-1ug/ml	Omicron-Spike RBD(40592-V08H121)-0.03ug/ml	Omicron-Spike RBD(40592-V08H121)-1ug/ml
	sample(ug/ml)		OD450-Blank	OD450-Blank	OD450-Blank	OD450-Blank	OD450-Blank	OD450-Blank		antibody	AIN7-AIN1-27
	0.00137174		0.0271	0.00675	0.0041	0.0386	-0.0035	0.00335		coat antibody	EC50(ug/mL)
	0.00411523		0.00185	0.0087	-0.01425	0.03455	-0.0035	-5e-05		Wild type (wuhan) RBD protein-0.03ug/ml	7.02307
	0.0123457		0.0074	0.01095	0.001	0.0297	-0.00215	-0.00015		Wild type (wuhan) RBD protein-1ug/ml	10.9626
	0.037037		0.06	0.07535	-0.0151	0.0889	-0.00055	-0.0008		delta RBD protein-0.03ug/ml	0.01979
	0.111111		0.10465	0.1045	0.0015	0.1244	-0.00515	-0.0042		delta RBD protein-1ug/ml	60.8633
	0.333333		0.27945	0.28925	-0.00675	0.2318	-0.00365	-0.0021		Omicron RBD protein-0.03ug/ml	0.00509
	AIN7-AIN1-27-1ug/mL		0.7916	0.8303	0.0214	0.866	-0.00125	0.00225		Omicron RBD protein-1ug/ml	0.29083
31	2nd		Goat Anti-Human IgG (H+L)/HRP-1：5000
	Coating		Wild type (wuhan) RBD protein(40592-V08B)-0.03ug/ml	Wild type (wuhan) RBD protein(40592-V08B)-1ug/ml	delta RBD protein(40592-V08H90)-0.03ug/ml	delta RBD protein(40592-V08H90)-1ug/ml	Omicron-Spike RBD(40592-V08H121)-0.03ug/ml	Omicron-Spike RBD(40592-V08H121)-1ug/ml
	sample(ug/ml)		OD450-Blank	OD450-Blank	OD450-Blank	OD450-Blank	OD450-Blank	OD450-Blank		antibody	AIN7-AIN1-28
	0.00137174		0.0026	-0.0062	-0.01685	0.04375	0.0022	-0.0024		coat antibody	EC50(ug/mL)
	0.00411523		-0.0066	0.2195	0.0203	-0.0065	0.0009	-0.0018		Wild type (wuhan) RBD protein-0.03ug/ml	0.03187
	0.0123457		-0.00125	0.0379	-0.00865	-0.03925	0.0002	0.0085		Wild type (wuhan) RBD protein-1ug/ml	0.21556
	0.037037		0.01575	0.02245	-0.01235	-0.0396	-0.0004	-0.0042		delta RBD protein-0.03ug/ml	0.29308
	0.111111		0.0259	-0.0074	0.02155	-0.03165	-0.0009	-0.00095		delta RBD protein-1ug/ml	0.00763
	0.333333		-0.004	0.0747	0.00225	-0.04705	0.0137	0.01365		Omicron RBD protein-0.03ug/ml	0.34806
	AIN7-AIN1-28-1ug/mL		0.04555	0.06845	0.001	0.02055	0.0078	0.00485		Omicron RBD protein-1ug/ml	0.18735
32	2nd		Goat Anti-Human IgG (H+L)/HRP-1：5000
	Coating		Wild type (wuhan) RBD protein(40592-V08B)-0.03ug/ml	Wild type (wuhan) RBD protein(40592-V08B)-1ug/ml	delta RBD protein(40592-V08H90)-0.03ug/ml	delta RBD protein(40592-V08H90)-1ug/ml	Omicron-Spike RBD(40592-V08H121)-0.03ug/ml	Omicron-Spike RBD(40592-V08H121)-1ug/ml
	sample(ug/ml)		OD450-Blank	OD450-Blank	OD450-Blank	OD450-Blank	OD450-Blank	OD450-Blank		antibody	AIN7-AIN1-29
	0.00137174		-0.0108	-0.0231	-0.03675	0.0177	-0.00085	-0.00015		coat antibody	EC50(ug/mL)
	0.00411523		0.0651	-0.0074	-0.02255	-0.0225	0.0014	-0.00065		Wild type (wuhan) RBD protein-0.03ug/ml	0.005
	0.0123457		0.0676	-0.0239	-0.1102	0.0082	0.01505	0.0023		Wild type (wuhan) RBD protein-1ug/ml	0.3344
	0.037037		-0.00635	-0.0173	-0.13735	0.01655	-0.00285	0.00045		delta RBD protein-0.03ug/ml	6005.23
	0.111111		-0.00135	-0.00915	-0.1305	0.0304	-0.00075	-0.0036		delta RBD protein-1ug/ml	20.5234
	0.333333		0.1225	0.0945	-0.1225	0.01765	0.016	0.0274		Omicron RBD protein-0.03ug/ml	0.00626
	AIN7-AIN1-29-1ug/mL		0.01955	0.1776	-0.1064	0.0942	0.00395	0.00805		Omicron RBD protein-1ug/ml	0.12214
33	2nd		Goat Anti-Human IgG (H+L)/HRP-1：5000
	Coating		Wild type (wuhan) RBD protein(40592-V08B)-0.03ug/ml	Wild type (wuhan) RBD protein(40592-V08B)-1ug/ml	delta RBD protein(40592-V08H90)-0.03ug/ml	delta RBD protein(40592-V08H90)-1ug/ml	Omicron-Spike RBD(40592-V08H121)-0.03ug/ml	Omicron-Spike RBD(40592-V08H121)-1ug/ml		antibody	AIN7-AIN1-30
	sample(ug/ml)		OD450-Blank	OD450-Blank	OD450-Blank	OD450-Blank	OD450-Blank	OD450-Blank		coat antibody	EC50(ug/mL)
	0.00137174		-0.0237	-0.01695	-0.0213	0.03305	-0.00985	-0.0015		Wild type (wuhan) RBD protein-0.03ug/ml	0.22402
	0.00411523		0.0879	0.07285	-0.00295	0.0831	-0.0123	-0.00245		Wild type (wuhan) RBD protein-1ug/ml	0.00404
	0.0123457		0.09395	0.14285	0.0186	0.0056	-0.0096	0.01225		delta RBD protein-0.03ug/ml	0.00411
	0.037037		0.07235	0.0584	-0.01495	0.01735	-0.0091	0.0013		delta RBD protein-1ug/ml	0.00643
	0.111111		0.07205	0.0528	0.0813	0.00055	-0.00555	-0.00085		Omicron RBD protein-0.03ug/ml	1.23849
	0.333333		-0.02185	0.0416	-0.04015	0.0396	-0.0101	0.0061		Omicron RBD protein-1ug/ml	1.71209e+07
	AIN7-AIN1-30-1ug/mL		0.0226	0.16605	0.0308	0.00925	0.0005	-0.00155
34	2nd		Goat Anti-Human IgG (H+L)/HRP-1：5000
	Coating		Wild type (wuhan) RBD protein(40592-V08B)-0.03ug/ml	Wild type (wuhan) RBD protein(40592-V08B)-1ug/ml	delta RBD protein(40592-V08H90)-0.03ug/ml	delta RBD protein(40592-V08H90)-1ug/ml	Omicron-Spike RBD(40592-V08H121)-0.03ug/ml	Omicron-Spike RBD(40592-V08H121)-1ug/ml		antibody	AIN7-AIN1-31
	sample(ug/ml)		OD450-Blank	OD450-Blank	OD450-Blank	OD450-Blank	OD450-Blank	OD450-Blank		coat antibody	EC50(ug/mL)
	0.00137174		0.5884	1.3633	0.4099	1.10395	0.0444	-0.0146		Wild type (wuhan) RBD protein-0.03ug/ml	0.00696
	0.00411523		1.28265	3.11575	0.72055	2.8489	-0.00455	0.0044		Wild type (wuhan) RBD protein-1ug/ml	0.0037
	0.0123457		2.393	4.29425	1.32015	4.18015	0.00075	0.051		delta RBD protein-0.03ug/ml	0.00196
	0.037037		3.0954	4.43565	1.51655	4.31705	0.0264	0.1617		delta RBD protein-1ug/ml	0.00375
	0.111111		3.33925	4.2185	1.63925	4.07305	0.01005	0.4781		Omicron RBD protein-0.03ug/ml	0.31126
	0.333333		3.55915	4.3734	2.09225	4.54705	0.0323	1.2125		Omicron RBD protein-1ug/ml	1.02268
	AIN7-AIN1-31-1ug/mL		3.6658	4.29085	2.1162	4.1301	0.03505	2.4277
35	2nd		Goat Anti-Human IgG (H+L)/HRP-1：5000
	Coating		Wild type (wuhan) RBD protein(40592-V08B)-0.03ug/ml	Wild type (wuhan) RBD protein(40592-V08B)-1ug/ml	delta RBD protein(40592-V08H90)-0.03ug/ml	delta RBD protein(40592-V08H90)-1ug/ml	Omicron-Spike RBD(40592-V08H121)-0.03ug/ml	Omicron-Spike RBD(40592-V08H121)-1ug/ml		antibody	AIN7-AIN1-38
	sample(ug/ml)		OD450-Blank	OD450-Blank	OD450-Blank	OD450-Blank	OD450-Blank	OD450-Blank		coat antibody	EC50(ug/mL)
	0.00137174		0.0618	0.79285	0.08285	0.87255	-0.0128	0.00035		Wild type (wuhan) RBD protein-0.03ug/ml	0.0276
	0.00411523		0.21645	2.14655	0.2048	2.1737	-0.0157	-0.00255		Wild type (wuhan) RBD protein-1ug/ml	0.0047
	0.0123457		0.54595	4.0752	0.38635	3.9376	-0.01365	0.0001		delta RBD protein-0.03ug/ml	0.05017
	0.037037		0.9745	4.412	0.62835	4.2897	-0.01745	-0.00415		delta RBD protein-1ug/ml	0.00477
	0.111111		1.29265	4.15175	0.72375	4.09635	0.0153	0.0027		Omicron RBD protein-0.03ug/ml	0.02574
	0.333333		1.6181	4.2985	1.0166	4.46845	-0.01795	-0.003		Omicron RBD protein-1ug/ml	3.07939
	AIN7-AIN1-38-1ug/mL		1.65945	4.2723	1.12175	4.1814	-0.0105	0.0148
36	2nd		Goat Anti-Human IgG (H+L)/HRP-1：5000
	Coating		Wild type (wuhan) RBD protein(40592-V08B)-0.03ug/ml	Wild type (wuhan) RBD protein(40592-V08B)-1ug/ml	delta RBD protein(40592-V08H90)-0.03ug/ml	delta RBD protein(40592-V08H90)-1ug/ml	Omicron-Spike RBD(40592-V08H121)-0.03ug/ml	Omicron-Spike RBD(40592-V08H121)-1ug/ml		antibody	AIN7-AIN1-40
	sample(ug/ml)		OD450-Blank	OD450-Blank	OD450-Blank	OD450-Blank	OD450-Blank	OD450-Blank		coat antibody	EC50(ug/mL)
	0.00137174		0.06555	0.4671	0.04285	0.4044	0.0203	-0.0102		Wild type (wuhan) RBD protein-0.03ug/ml	0.06968
	0.00411523		0.14265	1.22255	0.13005	1.197	0.1066	-0.0037		Wild type (wuhan) RBD protein-1ug/ml	0.00913
	0.0123457		0.23525	2.77215	0.28345	3.0384	0.00315	-0.00475		delta RBD protein-0.03ug/ml	0.18313
	0.037037		0.5339	4.1293	0.3763	4.2139	-0.0024	0.0082		delta RBD protein-1ug/ml	0.00788
	0.111111		1.02585	4.19165	0.66195	4.14585	0.0087	0.0315		Omicron RBD protein-0.03ug/ml	0.00824
	0.333333		1.46275	4.38985	1.1419	4.3065	0.01555	0.12655		Omicron RBD protein-1ug/ml	1.61206
	AIN7-AIN1-40-1ug/mL		1.4946	4.2881	1.36705	4.13605	0.00435	0.34735
37	2nd		Goat Anti-Human IgG (H+L)/HRP-1：5000
	Coating		Wild type (wuhan) RBD protein(40592-V08B)-0.03ug/ml	Wild type (wuhan) RBD protein(40592-V08B)-1ug/ml	delta RBD protein(40592-V08H90)-0.03ug/ml	delta RBD protein(40592-V08H90)-1ug/ml	Omicron-Spike RBD(40592-V08H121)-0.03ug/ml	Omicron-Spike RBD(40592-V08H121)-1ug/ml		antibody	AIN7-AIN1-42
	sample(ug/ml)		OD450-Blank	OD450-Blank	OD450-Blank	OD450-Blank	OD450-Blank	OD450-Blank		coat antibody	EC50(ug/mL)
	0.00137174		0.12495	0.7977	0.16005	0.7748	-0.0029	-0.00265		Wild type (wuhan) RBD protein-0.03ug/ml	0.00954
	0.00411523		0.50775	2.28225	0.40795	2.14745	0.001	0.0049		Wild type (wuhan) RBD protein-1ug/ml	0.00446
	0.0123457		0.9538	4.05335	0.71485	4.01075	0.00165	0.00775		delta RBD protein-0.03ug/ml	0.00097
	0.037037		1.59695	4.327	1.0121	4.25555	-0.00605	-0.0041		delta RBD protein-1ug/ml	0.0047
	0.111111		1.63545	4.211	1.12235	4.1243	-0.00615	-0.0011		Omicron RBD protein-0.03ug/ml	0.01718
	0.333333		1.6988	4.46035	1.03115	4.53675	-0.0061	0.00585		Omicron RBD protein-1ug/ml	0.39152
	AIN7-AIN1-42-1ug/mL		1.67335	4.2488	1.4679	4.2048	0.00145	0.0164
38	2nd		Goat Anti-Human IgG (H+L)/HRP-1：5000
	Coating		Wild type (wuhan) RBD protein(40592-V08B)-0.03ug/ml	Wild type (wuhan) RBD protein(40592-V08B)-1ug/ml	delta RBD protein(40592-V08H90)-0.03ug/ml	delta RBD protein(40592-V08H90)-1ug/ml	Omicron-Spike RBD(40592-V08H121)-0.03ug/ml	Omicron-Spike RBD(40592-V08H121)-1ug/ml		antibody	AIN7-AIN1-43
	sample(ug/ml)		OD450-Blank	OD450-Blank	OD450-Blank	OD450-Blank	OD450-Blank	OD450-Blank		coat antibody	EC50(ug/mL)
	0.00137174		-0.0229	-0.01645	0.00325	0.1261	0.00075	-0.0066		Wild type (wuhan) RBD protein-0.03ug/ml	0.83534
	0.00411523		0.1286	1.0448	0.08285	0.48965	0.0024	-0.0032		Wild type (wuhan) RBD protein-1ug/ml	0.00634
	0.0123457		0.0972	2.6081	0.08035	1.23965	0.01035	-0.00345		delta RBD protein-0.03ug/ml	5.15678
	0.037037		0.2873	3.61795	0.0169	2.9853	-0.0032	-0.0043		delta RBD protein-1ug/ml	0.02253
	0.111111		0.42635	3.5435	0.1104	3.9686	0.0098	0.001		Omicron RBD protein-0.03ug/ml	26.8639
	0.333333		0.49395	3.72755	0.09435	4.3225	0.0061	0.0055		Omicron RBD protein-1ug/ml	0.00161
	AIN7-AIN1-43-1ug/mL		0.78095	3.6218	0.23905	4.11125	0.01175	0.00435
39	2nd		Goat Anti-Human IgG (H+L)/HRP-1：5000
	Coating		Wild type (wuhan) RBD protein(40592-V08B)-0.03ug/ml	Wild type (wuhan) RBD protein(40592-V08B)-1ug/ml	delta RBD protein(40592-V08H90)-0.03ug/ml	delta RBD protein(40592-V08H90)-1ug/ml	Omicron-Spike RBD(40592-V08H121)-0.03ug/ml	Omicron-Spike RBD(40592-V08H121)-1ug/ml		antibody	AIN7-AIN1-45
	sample(ug/ml)		OD450-Blank	OD450-Blank	OD450-Blank	OD450-Blank	OD450-Blank	OD450-Blank		coat antibody	EC50(ug/mL)
	0.00137174		0.0521	0.93395	0.00665	0.7586	-0.00365	0.00095		Wild type (wuhan) RBD protein-0.03ug/ml	0.0241
	0.00411523		0.1751	2.48105	0.0415	2.0861	-0.00245	-0.00375		Wild type (wuhan) RBD protein-1ug/ml	0.00412
	0.0123457		0.42295	4.01495	0.1129	3.73355	-0.00305	-0.0021		delta RBD protein-0.03ug/ml	0.09893
	0.037037		0.7092	4.32115	0.1927	4.1525	-0.0019	-0.00515		delta RBD protein-1ug/ml	0.0047
	0.111111		0.9049	4.2384	0.31925	4.1155	-0.0013	-0.003		Omicron RBD protein-0.03ug/ml	0.50835
	0.333333		1.07755	4.3035	0.4233	4.3379	-0.0022	0.006		Omicron RBD protein-1ug/ml	0.00076
	AIN7-AIN1-45-1ug/mL		1.21365	4.2288	0.51275	4.06765	0.0072	-0.0011
40	2nd		Goat Anti-Human IgG (H+L)/HRP-1：5000
	Coating		Wild type (wuhan) RBD protein(40592-V08B)-0.03ug/ml	Wild type (wuhan) RBD protein(40592-V08B)-1ug/ml	delta RBD protein(40592-V08H90)-0.03ug/ml	delta RBD protein(40592-V08H90)-1ug/ml	Omicron-Spike RBD(40592-V08H121)-0.03ug/ml	Omicron-Spike RBD(40592-V08H121)-1ug/ml
	sample(ug/ml)		OD450-Blank	OD450-Blank	OD450-Blank	OD450-Blank	OD450-Blank	OD450-Blank		antibody	AIN7-AIN1-46
	0.00137174		-0.03875	0.0019	-0.0044	0.0148	-0.0051	-0.002		coat antibody	EC50(ug/mL)
	0.00411523		-0.03335	0.0284	0.0203	0.02015	-0.0035	0.02125		Wild type (wuhan) RBD protein-0.03ug/ml	7.67689
	0.0123457		-0.04015	0.0945	-0.00805	0.06785	-0.0057	-0.0043		Wild type (wuhan) RBD protein-1ug/ml	0.35325
	0.037037		-0.0323	0.34295	-0.0036	0.17215	-0.00185	0.02335		delta RBD protein-0.03ug/ml	0.02726
	0.111111		0.09465	0.9371	0.097	0.5066	-0.00635	-0.0026		delta RBD protein-1ug/ml	1.04564
	0.333333		0.0442	2.26335	0.0172	1.36715	-0.00425	-0.00195		Omicron RBD protein-0.03ug/ml	1.3183e-06
	AIN7-AIN1-46-1ug/mL		0.1206	3.59455	0.07145	2.9179	0.00605	0.00185		Omicron RBD protein-1ug/ml	0.10456
41	2nd		Goat Anti-Human IgG (H+L)/HRP-1：5000
	Coating		Wild type (wuhan) RBD protein(40592-V08B)-0.03ug/ml	Wild type (wuhan) RBD protein(40592-V08B)-1ug/ml	delta RBD protein(40592-V08H90)-0.03ug/ml	delta RBD protein(40592-V08H90)-1ug/ml	Omicron-Spike RBD(40592-V08H121)-0.03ug/ml	Omicron-Spike RBD(40592-V08H121)-1ug/ml
	sample(ug/ml)		OD450-Blank	OD450-Blank	OD450-Blank	OD450-Blank	OD450-Blank	OD450-Blank		antibody	AIN7-AIN1-47
	0.00137174		-0.0026	0.4957	-0.0042	0.19465	-0.00435	-0.0108		coat antibody	EC50(ug/mL)
	0.00411523		0.0516	1.53995	0.02995	0.676	0.00555	-0.0099		Wild type (wuhan) RBD protein-0.03ug/ml	0.19485
	0.0123457		0.0565	3.0827	0.00175	1.79675	0.0033	-0.00455		Wild type (wuhan) RBD protein-1ug/ml	0.00672
	0.037037		0.1558	4.16725	0.03	3.2251	0.0115	-0.0104		delta RBD protein-0.03ug/ml	0.05796
	0.111111		0.34545	4.2144	0.14115	3.97385	-0.00205	-0.0079		delta RBD protein-1ug/ml	0.01557
	0.333333		0.56905	4.3197	0.10695	4.2279	0.00385	-0.0103		Omicron RBD protein-0.03ug/ml	0.0014
	AIN7-AIN1-47-1ug/mL		0.75635	4.1987	0.18995	4.06885	0.0037	-0.00445		Omicron RBD protein-1ug/ml	0.98544
42	2nd		Goat Anti-Human IgG (H+L)/HRP-1：5000
	Coating		Wild type (wuhan) RBD protein(40592-V08B)-0.03ug/ml	Wild type (wuhan) RBD protein(40592-V08B)-1ug/ml	delta RBD protein(40592-V08H90)-0.03ug/ml	delta RBD protein(40592-V08H90)-1ug/ml	Omicron-Spike RBD(40592-V08H121)-0.03ug/ml	Omicron-Spike RBD(40592-V08H121)-1ug/ml
	sample(ug/ml)		OD450-Blank	OD450-Blank	OD450-Blank	OD450-Blank	OD450-Blank	OD450-Blank		antibody	AIN7-AIN1-48
	0.00137174		0.189	1.24265	0.08865	1.16885	-0.01985	0.0031		coat antibody	EC50(ug/mL)
	0.00411523		0.485	3.12605	0.2685	2.92855	-0.02305	-0.0003		Wild type (wuhan) RBD protein-0.03ug/ml	0.0131
	0.0123457		1.3661	4.19185	0.5758	4.00185	-0.03015	-0.0017		Wild type (wuhan) RBD protein-1ug/ml	0.00339
	0.037037		2.20725	4.2909	0.92595	4.3471	-0.02285	-0.0025		delta RBD protein-0.03ug/ml	0.00669
	0.111111		2.44765	4.22545	0.97155	4.0074	-0.023	0.00045		delta RBD protein-1ug/ml	0.00303
	0.333333		2.723	4.3289	1.13125	4.58715	-0.02975	-0.00655		Omicron RBD protein-0.03ug/ml	0.00405
	AIN7-AIN1-48-1ug/mL		3.00425	4.1507	1.4798	4.0557	-0.02165	0.00195		Omicron RBD protein-1ug/ml	0.2264
43	2nd		Goat Anti-Human IgG (H+L)/HRP-1：5000
	Coating		Wild type (wuhan) RBD protein(40592-V08B)-0.03ug/ml	Wild type (wuhan) RBD protein(40592-V08B)-1ug/ml	delta RBD protein(40592-V08H90)-0.03ug/ml	delta RBD protein(40592-V08H90)-1ug/ml	Omicron-Spike RBD(40592-V08H121)-0.03ug/ml	Omicron-Spike RBD(40592-V08H121)-1ug/ml
	sample(ug/ml)		OD450-Blank	OD450-Blank	OD450-Blank	OD450-Blank	OD450-Blank	OD450-Blank		antibody	AIN7-AIN1-49
	0.00137174		0.06935	1.0178	0.00135	0.4805	-0.00455	0.00025		coat antibody	EC50(ug/mL)
	0.00411523		0.1672	2.505	0.0275	1.19685	-0.0067	-0.0087		Wild type (wuhan) RBD protein-0.03ug/ml	0.04185
	0.0123457		0.1977	3.9871	0.0202	2.782	-0.0088	-0.00995		Wild type (wuhan) RBD protein-1ug/ml	0.00412
	0.037037		0.46675	4.20145	0.0434	4.0041	-0.00935	-0.0066		delta RBD protein-0.03ug/ml	0.23704
	0.111111		0.6405	4.1307	0.10705	4.0467	-0.00695	-0.00155		delta RBD protein-1ug/ml	0.00885
	0.333333		0.71495	4.18095	0.18835	4.30365	-0.0026	-0.00585		Omicron RBD protein-0.03ug/ml	0.12542
	AIN7-AIN1-49-1ug/mL		0.85445	4.1663	0.2608	4.22035	-0.0052	-0.0106		Omicron RBD protein-1ug/ml	0.38464
44	2nd		Goat Anti-Human IgG (H+L)/HRP-1：5000
	Coating		Wild type (wuhan) RBD protein(40592-V08B)-0.03ug/ml	Wild type (wuhan) RBD protein(40592-V08B)-1ug/ml	delta RBD protein(40592-V08H90)-0.03ug/ml	delta RBD protein(40592-V08H90)-1ug/ml	Omicron-Spike RBD(40592-V08H121)-0.03ug/ml	Omicron-Spike RBD(40592-V08H121)-1ug/ml
	sample(ug/ml)		OD450-Blank	OD450-Blank	OD450-Blank	OD450-Blank	OD450-Blank	OD450-Blank		antibody	AIN7-AIN1-50
	0.00137174		0.01425	0.68895	-0.48645	0.6211	-0.0009	0.00035		coat antibody	EC50(ug/mL)
	0.00411523		0.04125	1.8606	-0.47345	1.73855	0.0017	0.00385		Wild type (wuhan) RBD protein-0.03ug/ml	0.18137
	0.0123457		0.09065	3.71975	-0.44065	3.5135	0.00285	0.0027		Wild type (wuhan) RBD protein-1ug/ml	0.00539
	0.037037		0.2757	4.38815	-0.3394	4.12005	0.01505	0.0233		delta RBD protein-0.03ug/ml	0.09414
	0.111111		0.4007	4.16475	-0.279	3.99395	0.01285	-0.0006		delta RBD protein-1ug/ml	0.0056
	0.333333		0.53715	4.2785	-0.22595	4.3873	-0.0019	-0.00055		Omicron RBD protein-0.03ug/ml	0.00371
	AIN7-AIN1-50-1ug/mL		0.7186	4.2105	-0.14275	4.181	0.0011	-0.0051		Omicron RBD protein-1ug/ml	1.82215
45	2nd		Goat Anti-Human IgG (H+L)/HRP-1：5000
	Coating		Wild type (wuhan) RBD protein(40592-V08B)-0.03ug/ml	Wild type (wuhan) RBD protein(40592-V08B)-1ug/ml	delta RBD protein(40592-V08H90)-0.03ug/ml	delta RBD protein(40592-V08H90)-1ug/ml	Omicron-Spike RBD(40592-V08H121)-0.03ug/ml	Omicron-Spike RBD(40592-V08H121)-1ug/ml
	sample(ug/ml)		OD450-Blank	OD450-Blank	OD450-Blank	OD450-Blank	OD450-Blank	OD450-Blank		antibody	AIN7-AIN2-1
	0.00137174		0.6982	1.29455	0.4667	1.124	0.01335	0.04375		coat antibody	EC50(ug/mL)
	0.00411523		1.56435	3.20425	0.97345	3.0453	0.0005	0.02945		Wild type (wuhan) RBD protein-0.03ug/ml	0.0049
	0.0123457		2.5355	4.3697	1.4782	4.17295	0.04025	0.0861		Wild type (wuhan) RBD protein-1ug/ml	0.00359
	0.037037		3.055	4.3618	1.5758	4.47525	-0.00885	0.192		delta RBD protein-0.03ug/ml	0.00082
	0.111111		3.17315	4.36235	1.78585	4.157	0.03975	0.4946		delta RBD protein-1ug/ml	0.00309
	0.333333		3.1307	4.4025	1.82165	4.55735	0.0493	1.33295		Omicron RBD protein-0.03ug/ml	0.09404
	AIN7-AIN2-1-1ug/mL		3.2429	4.46835	1.99165	4.2904	0.03285	2.83035		Omicron RBD protein-1ug/ml	1.00925
46	2nd		Goat Anti-Human IgG (H+L)/HRP-1：5000
	Coating		Wild type (wuhan) RBD protein(40592-V08B)-0.03ug/ml	Wild type (wuhan) RBD protein(40592-V08B)-1ug/ml	delta RBD protein(40592-V08H90)-0.03ug/ml	delta RBD protein(40592-V08H90)-1ug/ml	Omicron-Spike RBD(40592-V08H121)-0.03ug/ml	Omicron-Spike RBD(40592-V08H121)-1ug/ml
	sample(ug/ml)		OD450-Blank	OD450-Blank	OD450-Blank	OD450-Blank	OD450-Blank	OD450-Blank		Antibody	AIN7-AIN2-2
	0.00137174		0.17515	1.2241	0.0846	1.19365	-0.00725	0.0004		coat protein	EC50(ug/mL)
	0.00411523		0.5645	3.10085	0.28555	3.0116	-0.00775	-0.0001		Wild type (wuhan) RBD protein-0.03ug/ml	0.00989
	0.0123457		1.113	4.107	0.6008	3.9729	-0.0068	0.002		Wild type (wuhan) RBD protein-1ug/ml	0.00292
	0.037037		1.6743	4.2329	0.8479	4.2858	-0.00395	0.0083		delta RBD protein-0.03ug/ml	0.01257
	0.111111		1.9261	4.21445	0.95865	4.0425	-0.0015	-0.00185		delta RBD protein-1ug/ml	0.00281
	0.333333		2.2095	4.2978	1.1857	4.40125	-0.00945	-0.00325		Omicron RBD protein-0.03ug/ml	1.0921
	AIN7-AIN2-2-1ug/mL		2.36625	4.2353	1.4683	3.99195	0.0055	0.00065		Omicron RBD protein-1ug/ml	0.07655

## Sheet: AIN7-22AIN401
		0.00137174	-0.0229	-0.01645	0.00325	0.1261	0.00075	-0.0066
		0.00411523	0.1286	1.0448	0.08285	0.48965	0.0024	-0.0032
		0.0123457	0.0972	2.6081	0.08035	1.23965	0.01035	-0.00345
		0.037037	0.2873	3.61795	0.0169	2.9853	-0.0032	-0.0043
		0.111111	0.42635	3.5435	0.1104	3.9686	0.0098	0.001
		0.333333	0.49395	3.72755	0.09435	4.3225	0.0061	0.0055
		1	0.78095	3.6218	0.23905	4.11125	0.01175	0.00435
													Wild type (wuhan) RBD protein-0.03ug/ml
													Wild type (wuhan) RBD protein-1ug/ml
													delta RBD protein-0.03ug/ml
													delta RBD protein-1ug/ml
													Omicron RBD protein-0.03ug/ml
													Omicron RBD protein-1ug/ml
