# Supplementary material for: AI Designed, Mutation Resistant Broad Neutralizing Antibodies Against Multiple SARS-CoV-2 Strains
Source: Research Square preprint supplement (doi:10.21203/rs.3.rs-5184292/v1), 2025-03-27
Supplement: Supplementary file 19 [file S4a_2022-0127_SARS2_Delta_Ainnocence_Antibodies_AV_Report.xlsx]

## Sheet: Cmpds DR Graphs
Compound ID	Batch	Library	Supplier	Supplier Id	IC50 (ng/mL)	Graph	Activity Status	Max % Inhibition	Conc @ Max % Inhibition	Number Included Points
AB01974161	01	Ainno_16251	Ainnocence	AIN2-1_REGN10933	1.21		Active	159.93	3.178	40
AB01974177	01	Ainno_16251	Ainnocence	AIN1-31_AINNL0031	2.704		Active	116.48	98.08	40
AB01974162	01	Ainno_16251	Ainnocence	AIN2-2_REGN10987	4.704		Active	128.86	31.74	40
AB01974210	01	Ainno_16251	Ainnocence	AIN1-48_AINNL0048	14.076		Active	109.96	110.3	40
AB01974191	01	Ainno_16251	Ainnocence	AIN1-42_AINNL0042	36.134		Active	131.78	109.2	40
AB01974207	01	Ainno_16251	Ainnocence	AIN1-45_AINNL0045	42.743		Active	102.12	114.7	40
AB01974211	01	Ainno_16251	Ainnocence	AIN1-49_AINNL0049	89.647		Active	169.39	355.6	40
AB01974212	01	Ainno_16251	Ainnocence	AIN1-50_AINNL0050	89.943		Active	108.57	3551	40
AB01974205	01	Ainno_16251	Ainnocence	AIN1-43_AINNL0043	196.18		Active	123.23	1235	40
AB01974187	01	Ainno_16251	Ainnocence	AIN1-38_AINNL0038	199.241		Active	160.54	1091	40
AB01974189	01	Ainno_16251	Ainnocence	AIN1-40_AINNL0040	1142.85		Active	138.69	3411	40
AB01974209	01	Ainno_16251	Ainnocence	AIN1-47_AINNL0047	1880.59		Active	117.5	7842	40
AB01974175	01	Ainno_16251	Ainnocence	AIN1-29_AINNL0029	>10000		Inactive	3.17	10.04	39
AB01974178	01	Ainno_16251	Ainnocence	AIN1-32_AINNL0032	>10220		Inactive	2.72	102.5	40
AB01974172	01	Ainno_16251	Ainnocence	AIN1-22_AINNL0022	>10220		Inactive	2.87	3.248	40
AB01974179	01	Ainno_16251	Ainnocence	AIN1-33_AINNL0033	>10670		Inactive	1.35	33.86	40
AB01974188	01	Ainno_16251	Ainnocence	AIN1-39_AINNL0039	>10670		Inactive	7.02	10670	40
AB01974185	01	Ainno_16251	Ainnocence	AIN1-13_AINNL0013	>10670		Inactive	1.94	0.01076	40
AB01974186	01	Ainno_16251	Ainnocence	AIN1-15_AINNL0015	>10780		Inactive	2.96	10780	40
AB01974173	01	Ainno_16251	Ainnocence	AIN1-26_AINNL0026	>10890		Inactive	2.61	0.3466	40
AB01974190	01	Ainno_16251	Ainnocence	AIN1-41_AINNL0041	>10890		Inactive	18.03	0.03471	40
AB01974171	01	Ainno_16251	Ainnocence	AIN1-21_AINNL0021	>11000		Inactive	2.87	110.3	40
AB01974181	01	Ainno_16251	Ainnocence	AIN1-1_AINNL0001	>11000		Inactive	1.9	0.03506	40
AB01974170	01	Ainno_16251	Ainnocence	AIN1-18_AINNL0018	>11220		Inactive	2.96	3551	40
AB01974206	01	Ainno_16251	Ainnocence	AIN1-44_AINNL0044	>11440		Inactive	2.44	3.662e-05	40
AB01974213	01	Ainno_16251	Ainnocence	AIN1-16_AINNL0016	>11440		Inactive	2.65	0.1152	40
AB01974163	01	Ainno_16251	Ainnocence	AIN1-3_AINNL0003	>11670		Inactive	1.24	1.182e-05	40
AB01974169	01	Ainno_16251	Ainnocence	AIN1-10_AINNL0010	>11670		Inactive	2.19	0.000373	40
AB01974198	01	Ainno_16251	Ainnocence	AIN1-19_AINNL0019	>11670		Inactive	2.5	3.741e-06	40
AB01974194	01	Ainno_16251	Ainnocence	AIN1-17_AINNL0017	>11780		Inactive	1.62	1180	40
AB01974167	01	Ainno_16251	Ainnocence	AIN1-8_AINNL0008	>11780		Inactive	2.79	0.03755	40
AB01974166	01	Ainno_16251	Ainnocence	AIN1-7_AINNL0007	>11780		Inactive	2.31	11780	40
AB01974165	01	Ainno_16251	Ainnocence	AIN1-6_AINNL0006	>11780		Inactive	1.46	37.39	39
AB01974164	01	Ainno_16251	Ainnocence	AIN1-5_AINNL0005	>11780		Inactive	0.78	11780	40
AB01974193	01	Ainno_16251	Ainnocence	AIN1-14_AINNL0014	>11890		Inactive	1.83	1.205e-05	40
AB01974199	01	Ainno_16251	Ainnocence	AIN1-24_AINNL0024	>12110		Inactive	1.71	3.877e-05	40
AB01974168	01	Ainno_16251	Ainnocence	AIN1-9_AINNL0009	>12330		Inactive	2.06	123.7	40
AB01974208	01	Ainno_16251	Ainnocence	AIN1-46_AINNL0046	>13110		Active	111.81	13110	40
AB01974201	01	Ainno_16251	Ainnocence	AIN1-27_AINNL0027	>1440		Inactive	2.43	0.04583	40
AB01974204	01	Ainno_16251	Ainnocence	AIN1-37_AINNL0037	>2110		Inactive	2.08	2.138e-06	40
AB01974203	01	Ainno_16251	Ainnocence	AIN1-35_AINNL0035	>2330		Inactive	2.11	0.00235	40
AB01974202	01	Ainno_16251	Ainnocence	AIN1-34_AINNL0034	>2560		Inactive	2.44	8.183e-05	40
AB01974197	01	Ainno_16251	Ainnocence	AIN1-23_AINNL0023	>3440		Inactive	10.1	0.001098	40
AB01974195	01	Ainno_16251	Ainnocence	AIN1-12_AINNL0012	>41220		Inactive	1.43	41.4	40
AB01974196	01	Ainno_16251	Ainnocence	AIN1-20_AINNL0020	>45220		Inactive	1.71	1.439	40
AB01974183	01	Ainno_16251	Ainnocence	AIN1-2_AINNL0002	>4780		Inactive	1.11	0.01524	40
AB01974192	01	Ainno_16251	Ainnocence	AIN1-11_AINNL0011	>5440		Inactive	4.45	1722	40
AB01974184	01	Ainno_16251	Ainnocence	AIN1-4_AINNL0004	>5670		Inactive	2.04	0.01807	40
AB01974200	01	Ainno_16251	Ainnocence	AIN1-25_AINNL0025	>7670		Inactive	2.54	2.459e-06	40
AB01974176	01	Ainno_16251	Ainnocence	AIN1-30_AINNL0030	>8670		Inactive	2.49	0.276	40
AB01974180	01	Ainno_16251	Ainnocence	AIN1-36_AINNL0036	>9440		Inactive	2.17	945.4	40
AB01974174	01	Ainno_16251	Ainnocence	AIN1-28_AINNL0028	>9670		Inactive	5.49	0.3078	40

## Sheet: Cmpds DR Data
Compound ID	Batch	Library ID	Supplier	Supplier ID	Supplier Batch	Plate ID	Well Ref	Assay Conc	Assay Conc Unit	Data Value	% Inhibition	IC50 (ng/mL)	Activity Status	Curve Fit Hill Slope	Curve Fit Norm Chi2	Curve Fit StDev	Number Included Points	Test ID
AB01974163	01	Ainno_16251	Ainnocence	AIN1-3_AINNL0003	Lot# MB15NO4103	TC00820832	A003	11670	ng/ml	2300	-0.52	>11670	Inactive	-1.12	0.69	0	40	20220127_SR2DLT_Ab
AB01974163	01	Ainno_16251	Ainnocence	AIN1-3_AINNL0003	Lot# MB15NO4103	TC00820831	A003	11670	ng/ml	2100	-0.17							20220127_SR2DLT_Ab
AB01974163	01	Ainno_16251	Ainnocence	AIN1-3_AINNL0003	Lot# MB15NO4103	TC00820832	A004	3693	ng/ml	1950	-1.01							20220127_SR2DLT_Ab
AB01974163	01	Ainno_16251	Ainnocence	AIN1-3_AINNL0003	Lot# MB15NO4103	TC00820831	A004	3693	ng/ml	2525	0.56							20220127_SR2DLT_Ab
AB01974163	01	Ainno_16251	Ainnocence	AIN1-3_AINNL0003	Lot# MB15NO4103	TC00820832	A005	1169	ng/ml	2375	-0.41							20220127_SR2DLT_Ab
AB01974163	01	Ainno_16251	Ainnocence	AIN1-3_AINNL0003	Lot# MB15NO4103	TC00820831	A005	1169	ng/ml	1900	-0.51							20220127_SR2DLT_Ab
AB01974163	01	Ainno_16251	Ainnocence	AIN1-3_AINNL0003	Lot# MB15NO4103	TC00820832	A006	369.8	ng/ml	1525	-1.61							20220127_SR2DLT_Ab
AB01974163	01	Ainno_16251	Ainnocence	AIN1-3_AINNL0003	Lot# MB15NO4103	TC00820831	A006	369.8	ng/ml	2250	0.09							20220127_SR2DLT_Ab
AB01974163	01	Ainno_16251	Ainnocence	AIN1-3_AINNL0003	Lot# MB15NO4103	TC00820832	A007	117	ng/ml	2675	0.01							20220127_SR2DLT_Ab
AB01974163	01	Ainno_16251	Ainnocence	AIN1-3_AINNL0003	Lot# MB15NO4103	TC00820831	A007	117	ng/ml	2025	-0.3							20220127_SR2DLT_Ab
AB01974163	01	Ainno_16251	Ainnocence	AIN1-3_AINNL0003	Lot# MB15NO4103	TC00820832	A008	37.04	ng/ml	1950	-1.01							20220127_SR2DLT_Ab
AB01974163	01	Ainno_16251	Ainnocence	AIN1-3_AINNL0003	Lot# MB15NO4103	TC00820831	A008	37.04	ng/ml	2325	0.21							20220127_SR2DLT_Ab
AB01974163	01	Ainno_16251	Ainnocence	AIN1-3_AINNL0003	Lot# MB15NO4103	TC00820832	A009	11.72	ng/ml	2100	-0.8							20220127_SR2DLT_Ab
AB01974163	01	Ainno_16251	Ainnocence	AIN1-3_AINNL0003	Lot# MB15NO4103	TC00820831	A009	11.72	ng/ml	2350	0.26							20220127_SR2DLT_Ab
AB01974163	01	Ainno_16251	Ainnocence	AIN1-3_AINNL0003	Lot# MB15NO4103	TC00820832	A010	3.709	ng/ml	3200	0.75							20220127_SR2DLT_Ab
AB01974163	01	Ainno_16251	Ainnocence	AIN1-3_AINNL0003	Lot# MB15NO4103	TC00820831	A010	3.709	ng/ml	2075	-0.21							20220127_SR2DLT_Ab
AB01974163	01	Ainno_16251	Ainnocence	AIN1-3_AINNL0003	Lot# MB15NO4103	TC00820832	A011	1.174	ng/ml	2425	-0.34							20220127_SR2DLT_Ab
AB01974163	01	Ainno_16251	Ainnocence	AIN1-3_AINNL0003	Lot# MB15NO4103	TC00820831	A011	1.174	ng/ml	1575	-1.07							20220127_SR2DLT_Ab
AB01974163	01	Ainno_16251	Ainnocence	AIN1-3_AINNL0003	Lot# MB15NO4103	TC00820832	A012	0.3714	ng/ml	2200	-0.66							20220127_SR2DLT_Ab
AB01974163	01	Ainno_16251	Ainnocence	AIN1-3_AINNL0003	Lot# MB15NO4103	TC00820831	A012	0.3714	ng/ml	2150	-0.09							20220127_SR2DLT_Ab
AB01974163	01	Ainno_16251	Ainnocence	AIN1-3_AINNL0003	Lot# MB15NO4103	TC00820832	A013	0.1175	ng/ml	2050	-0.87							20220127_SR2DLT_Ab
AB01974163	01	Ainno_16251	Ainnocence	AIN1-3_AINNL0003	Lot# MB15NO4103	TC00820831	A013	0.1175	ng/ml	1850	-0.6							20220127_SR2DLT_Ab
AB01974163	01	Ainno_16251	Ainnocence	AIN1-3_AINNL0003	Lot# MB15NO4103	TC00820832	A014	0.0372	ng/ml	2150	-0.73							20220127_SR2DLT_Ab
AB01974163	01	Ainno_16251	Ainnocence	AIN1-3_AINNL0003	Lot# MB15NO4103	TC00820831	A014	0.0372	ng/ml	1450	-1.29							20220127_SR2DLT_Ab
AB01974163	01	Ainno_16251	Ainnocence	AIN1-3_AINNL0003	Lot# MB15NO4103	TC00820832	A015	0.01177	ng/ml	2150	-0.73							20220127_SR2DLT_Ab
AB01974163	01	Ainno_16251	Ainnocence	AIN1-3_AINNL0003	Lot# MB15NO4103	TC00820831	A015	0.01177	ng/ml	1925	-0.47							20220127_SR2DLT_Ab
AB01974163	01	Ainno_16251	Ainnocence	AIN1-3_AINNL0003	Lot# MB15NO4103	TC00820832	A016	0.003725	ng/ml	2675	0.01							20220127_SR2DLT_Ab
AB01974163	01	Ainno_16251	Ainnocence	AIN1-3_AINNL0003	Lot# MB15NO4103	TC00820831	A016	0.003725	ng/ml	2400	0.34							20220127_SR2DLT_Ab
AB01974163	01	Ainno_16251	Ainnocence	AIN1-3_AINNL0003	Lot# MB15NO4103	TC00820832	A017	0.001179	ng/ml	2175	-0.69							20220127_SR2DLT_Ab
AB01974163	01	Ainno_16251	Ainnocence	AIN1-3_AINNL0003	Lot# MB15NO4103	TC00820831	A017	0.001179	ng/ml	2200	0							20220127_SR2DLT_Ab
AB01974163	01	Ainno_16251	Ainnocence	AIN1-3_AINNL0003	Lot# MB15NO4103	TC00820832	A018	0.000373	ng/ml	2350	-0.45							20220127_SR2DLT_Ab
AB01974163	01	Ainno_16251	Ainnocence	AIN1-3_AINNL0003	Lot# MB15NO4103	TC00820831	A018	0.000373	ng/ml	1850	-0.6							20220127_SR2DLT_Ab
AB01974163	01	Ainno_16251	Ainnocence	AIN1-3_AINNL0003	Lot# MB15NO4103	TC00820832	A019	0.0001181	ng/ml	2675	0.01							20220127_SR2DLT_Ab
AB01974163	01	Ainno_16251	Ainnocence	AIN1-3_AINNL0003	Lot# MB15NO4103	TC00820831	A019	0.0001181	ng/ml	2075	-0.21							20220127_SR2DLT_Ab
AB01974163	01	Ainno_16251	Ainnocence	AIN1-3_AINNL0003	Lot# MB15NO4103	TC00820832	A020	3.736e-05	ng/ml	2050	-0.87							20220127_SR2DLT_Ab
AB01974163	01	Ainno_16251	Ainnocence	AIN1-3_AINNL0003	Lot# MB15NO4103	TC00820831	A020	3.736e-05	ng/ml	2075	-0.21							20220127_SR2DLT_Ab
AB01974163	01	Ainno_16251	Ainnocence	AIN1-3_AINNL0003	Lot# MB15NO4103	TC00820832	A021	1.182e-05	ng/ml	3550	1.24							20220127_SR2DLT_Ab
AB01974163	01	Ainno_16251	Ainnocence	AIN1-3_AINNL0003	Lot# MB15NO4103	TC00820831	A021	1.182e-05	ng/ml	2000	-0.34							20220127_SR2DLT_Ab
AB01974163	01	Ainno_16251	Ainnocence	AIN1-3_AINNL0003	Lot# MB15NO4103	TC00820832	A022	3.741e-06	ng/ml	2150	-0.73							20220127_SR2DLT_Ab
AB01974163	01	Ainno_16251	Ainnocence	AIN1-3_AINNL0003	Lot# MB15NO4103	TC00820831	A022	3.741e-06	ng/ml	2850	1.11							20220127_SR2DLT_Ab
AB01974164	01	Ainno_16251	Ainnocence	AIN1-5_AINNL0005	Lot# MB15NO4105	TC00820832	B003	11780	ng/ml	3225	0.78	>11780	Inactive	-6.93	0.64	27.77	40	20220127_SR2DLT_Ab
AB01974164	01	Ainno_16251	Ainnocence	AIN1-5_AINNL0005	Lot# MB15NO4105	TC00820831	B003	11780	ng/ml	1850	-0.6							20220127_SR2DLT_Ab
AB01974164	01	Ainno_16251	Ainnocence	AIN1-5_AINNL0005	Lot# MB15NO4105	TC00820832	B004	3728	ng/ml	1875	-1.11							20220127_SR2DLT_Ab
AB01974164	01	Ainno_16251	Ainnocence	AIN1-5_AINNL0005	Lot# MB15NO4105	TC00820831	B004	3728	ng/ml	1800	-0.69							20220127_SR2DLT_Ab
AB01974164	01	Ainno_16251	Ainnocence	AIN1-5_AINNL0005	Lot# MB15NO4105	TC00820832	B005	1180	ng/ml	2375	-0.41							20220127_SR2DLT_Ab
AB01974164	01	Ainno_16251	Ainnocence	AIN1-5_AINNL0005	Lot# MB15NO4105	TC00820831	B005	1180	ng/ml	1825	-0.64							20220127_SR2DLT_Ab
AB01974164	01	Ainno_16251	Ainnocence	AIN1-5_AINNL0005	Lot# MB15NO4105	TC00820832	B006	373.3	ng/ml	1925	-1.04							20220127_SR2DLT_Ab
AB01974164	01	Ainno_16251	Ainnocence	AIN1-5_AINNL0005	Lot# MB15NO4105	TC00820831	B006	373.3	ng/ml	1950	-0.43							20220127_SR2DLT_Ab
AB01974164	01	Ainno_16251	Ainnocence	AIN1-5_AINNL0005	Lot# MB15NO4105	TC00820832	B007	118.1	ng/ml	1975	-0.97							20220127_SR2DLT_Ab
AB01974164	01	Ainno_16251	Ainnocence	AIN1-5_AINNL0005	Lot# MB15NO4105	TC00820831	B007	118.1	ng/ml	2200	0							20220127_SR2DLT_Ab
AB01974164	01	Ainno_16251	Ainnocence	AIN1-5_AINNL0005	Lot# MB15NO4105	TC00820832	B008	37.39	ng/ml	2550	-0.16							20220127_SR2DLT_Ab
AB01974164	01	Ainno_16251	Ainnocence	AIN1-5_AINNL0005	Lot# MB15NO4105	TC00820831	B008	37.39	ng/ml	2325	0.21							20220127_SR2DLT_Ab
AB01974164	01	Ainno_16251	Ainnocence	AIN1-5_AINNL0005	Lot# MB15NO4105	TC00820832	B009	11.83	ng/ml	2175	-0.69							20220127_SR2DLT_Ab
AB01974164	01	Ainno_16251	Ainnocence	AIN1-5_AINNL0005	Lot# MB15NO4105	TC00820831	B009	11.83	ng/ml	1800	-0.69							20220127_SR2DLT_Ab
AB01974164	01	Ainno_16251	Ainnocence	AIN1-5_AINNL0005	Lot# MB15NO4105	TC00820832	B010	3.744	ng/ml	2500	-0.23							20220127_SR2DLT_Ab
AB01974164	01	Ainno_16251	Ainnocence	AIN1-5_AINNL0005	Lot# MB15NO4105	TC00820831	B010	3.744	ng/ml	1725	-0.81							20220127_SR2DLT_Ab
AB01974164	01	Ainno_16251	Ainnocence	AIN1-5_AINNL0005	Lot# MB15NO4105	TC00820832	B011	1.185	ng/ml	2850	0.26							20220127_SR2DLT_Ab
AB01974164	01	Ainno_16251	Ainnocence	AIN1-5_AINNL0005	Lot# MB15NO4105	TC00820831	B011	1.185	ng/ml	1950	-0.43							20220127_SR2DLT_Ab
AB01974164	01	Ainno_16251	Ainnocence	AIN1-5_AINNL0005	Lot# MB15NO4105	TC00820832	B012	0.3749	ng/ml	2900	0.33							20220127_SR2DLT_Ab
AB01974164	01	Ainno_16251	Ainnocence	AIN1-5_AINNL0005	Lot# MB15NO4105	TC00820831	B012	0.3749	ng/ml	2275	0.13							20220127_SR2DLT_Ab
AB01974164	01	Ainno_16251	Ainnocence	AIN1-5_AINNL0005	Lot# MB15NO4105	TC00820832	B013	0.1187	ng/ml	2875	0.29							20220127_SR2DLT_Ab
AB01974164	01	Ainno_16251	Ainnocence	AIN1-5_AINNL0005	Lot# MB15NO4105	TC00820831	B013	0.1187	ng/ml	2475	0.47							20220127_SR2DLT_Ab
AB01974164	01	Ainno_16251	Ainnocence	AIN1-5_AINNL0005	Lot# MB15NO4105	TC00820832	B014	0.03755	ng/ml	2400	-0.38							20220127_SR2DLT_Ab
AB01974164	01	Ainno_16251	Ainnocence	AIN1-5_AINNL0005	Lot# MB15NO4105	TC00820831	B014	0.03755	ng/ml	1700	-0.86							20220127_SR2DLT_Ab
AB01974164	01	Ainno_16251	Ainnocence	AIN1-5_AINNL0005	Lot# MB15NO4105	TC00820832	B015	0.01188	ng/ml	3075	0.57							20220127_SR2DLT_Ab
AB01974164	01	Ainno_16251	Ainnocence	AIN1-5_AINNL0005	Lot# MB15NO4105	TC00820831	B015	0.01188	ng/ml	1875	-0.56							20220127_SR2DLT_Ab
AB01974164	01	Ainno_16251	Ainnocence	AIN1-5_AINNL0005	Lot# MB15NO4105	TC00820832	B016	0.00376	ng/ml	2075	-0.83							20220127_SR2DLT_Ab
AB01974164	01	Ainno_16251	Ainnocence	AIN1-5_AINNL0005	Lot# MB15NO4105	TC00820831	B016	0.00376	ng/ml	2050	-0.26							20220127_SR2DLT_Ab
AB01974164	01	Ainno_16251	Ainnocence	AIN1-5_AINNL0005	Lot# MB15NO4105	TC00820832	B017	0.00119	ng/ml	2150	-0.73							20220127_SR2DLT_Ab
AB01974164	01	Ainno_16251	Ainnocence	AIN1-5_AINNL0005	Lot# MB15NO4105	TC00820831	B017	0.00119	ng/ml	1650	-0.94							20220127_SR2DLT_Ab
AB01974164	01	Ainno_16251	Ainnocence	AIN1-5_AINNL0005	Lot# MB15NO4105	TC00820832	B018	0.0003766	ng/ml	2350	-0.45							20220127_SR2DLT_Ab
AB01974164	01	Ainno_16251	Ainnocence	AIN1-5_AINNL0005	Lot# MB15NO4105	TC00820831	B018	0.0003766	ng/ml	2275	0.13							20220127_SR2DLT_Ab
AB01974164	01	Ainno_16251	Ainnocence	AIN1-5_AINNL0005	Lot# MB15NO4105	TC00820832	B019	0.0001192	ng/ml	2075	-0.83							20220127_SR2DLT_Ab
AB01974164	01	Ainno_16251	Ainnocence	AIN1-5_AINNL0005	Lot# MB15NO4105	TC00820831	B019	0.0001192	ng/ml	1975	-0.39							20220127_SR2DLT_Ab
AB01974164	01	Ainno_16251	Ainnocence	AIN1-5_AINNL0005	Lot# MB15NO4105	TC00820832	B020	3.771e-05	ng/ml	2950	0.4							20220127_SR2DLT_Ab
AB01974164	01	Ainno_16251	Ainnocence	AIN1-5_AINNL0005	Lot# MB15NO4105	TC00820831	B020	3.771e-05	ng/ml	2500	0.51							20220127_SR2DLT_Ab
AB01974164	01	Ainno_16251	Ainnocence	AIN1-5_AINNL0005	Lot# MB15NO4105	TC00820832	B021	1.193e-05	ng/ml	2050	-0.87							20220127_SR2DLT_Ab
AB01974164	01	Ainno_16251	Ainnocence	AIN1-5_AINNL0005	Lot# MB15NO4105	TC00820831	B021	1.193e-05	ng/ml	2100	-0.17							20220127_SR2DLT_Ab
AB01974164	01	Ainno_16251	Ainnocence	AIN1-5_AINNL0005	Lot# MB15NO4105	TC00820832	B022	3.777e-06	ng/ml	3050	0.54							20220127_SR2DLT_Ab
AB01974164	01	Ainno_16251	Ainnocence	AIN1-5_AINNL0005	Lot# MB15NO4105	TC00820831	B022	3.777e-06	ng/ml	1475	-1.24							20220127_SR2DLT_Ab
AB01974165	01	Ainno_16251	Ainnocence	AIN1-6_AINNL0006	Lot# MB15NO4106	TC00820832	C003	11780	ng/ml	2550	-0.16	>11780	Inactive	-0.31	0.75	0	39	20220127_SR2DLT_Ab
AB01974165	01	Ainno_16251	Ainnocence	AIN1-6_AINNL0006	Lot# MB15NO4106	TC00820831	C003	11780	ng/ml	2950	1.29							20220127_SR2DLT_Ab
AB01974165	01	Ainno_16251	Ainnocence	AIN1-6_AINNL0006	Lot# MB15NO4106	TC00820832	C004	3728	ng/ml	2075	-0.83							20220127_SR2DLT_Ab
AB01974165	01	Ainno_16251	Ainnocence	AIN1-6_AINNL0006	Lot# MB15NO4106	TC00820831	C004	3728	ng/ml	2675	0.81							20220127_SR2DLT_Ab
AB01974165	01	Ainno_16251	Ainnocence	AIN1-6_AINNL0006	Lot# MB15NO4106	TC00820832	C005	1180	ng/ml	1875	-1.11							20220127_SR2DLT_Ab
AB01974165	01	Ainno_16251	Ainnocence	AIN1-6_AINNL0006	Lot# MB15NO4106	TC00820831	C005	1180	ng/ml	2100	-0.17							20220127_SR2DLT_Ab
AB01974165	01	Ainno_16251	Ainnocence	AIN1-6_AINNL0006	Lot# MB15NO4106	TC00820832	C006	373.3	ng/ml	1625	-1.46							20220127_SR2DLT_Ab
AB01974165	01	Ainno_16251	Ainnocence	AIN1-6_AINNL0006	Lot# MB15NO4106	TC00820831	C006	373.3	ng/ml	2600	0.69							20220127_SR2DLT_Ab
AB01974165	01	Ainno_16251	Ainnocence	AIN1-6_AINNL0006	Lot# MB15NO4106	TC00820832	C007	118.1	ng/ml	2425	-0.34							20220127_SR2DLT_Ab
AB01974165	01	Ainno_16251	Ainnocence	AIN1-6_AINNL0006	Lot# MB15NO4106	TC00820831	C007	118.1	ng/ml	2025	-0.3							20220127_SR2DLT_Ab
AB01974165	01	Ainno_16251	Ainnocence	AIN1-6_AINNL0006	Lot# MB15NO4106	TC00820832	C008	37.39	ng/ml	2475	-0.27							20220127_SR2DLT_Ab
AB01974165	01	Ainno_16251	Ainnocence	AIN1-6_AINNL0006	Lot# MB15NO4106	TC00820831	C008	37.39	ng/ml	3050	1.46							20220127_SR2DLT_Ab
AB01974165	01	Ainno_16251	Ainnocence	AIN1-6_AINNL0006	Lot# MB15NO4106	TC00820832	C009	11.83	ng/ml	2300	-0.52							20220127_SR2DLT_Ab
AB01974165	01	Ainno_16251	Ainnocence	AIN1-6_AINNL0006	Lot# MB15NO4106	TC00820832	C010	3.744	ng/ml	2075	-0.83							20220127_SR2DLT_Ab
AB01974165	01	Ainno_16251	Ainnocence	AIN1-6_AINNL0006	Lot# MB15NO4106	TC00820831	C010	3.744	ng/ml	1900	-0.51							20220127_SR2DLT_Ab
AB01974165	01	Ainno_16251	Ainnocence	AIN1-6_AINNL0006	Lot# MB15NO4106	TC00820832	C011	1.185	ng/ml	3650	1.38							20220127_SR2DLT_Ab
AB01974165	01	Ainno_16251	Ainnocence	AIN1-6_AINNL0006	Lot# MB15NO4106	TC00820831	C011	1.185	ng/ml	2575	0.64							20220127_SR2DLT_Ab
AB01974165	01	Ainno_16251	Ainnocence	AIN1-6_AINNL0006	Lot# MB15NO4106	TC00820832	C012	0.3749	ng/ml	3500	1.17							20220127_SR2DLT_Ab
AB01974165	01	Ainno_16251	Ainnocence	AIN1-6_AINNL0006	Lot# MB15NO4106	TC00820831	C012	0.3749	ng/ml	2900	1.2							20220127_SR2DLT_Ab
AB01974165	01	Ainno_16251	Ainnocence	AIN1-6_AINNL0006	Lot# MB15NO4106	TC00820832	C013	0.1187	ng/ml	2875	0.29							20220127_SR2DLT_Ab
AB01974165	01	Ainno_16251	Ainnocence	AIN1-6_AINNL0006	Lot# MB15NO4106	TC00820831	C013	0.1187	ng/ml	2125	-0.13							20220127_SR2DLT_Ab
AB01974165	01	Ainno_16251	Ainnocence	AIN1-6_AINNL0006	Lot# MB15NO4106	TC00820832	C014	0.03755	ng/ml	2675	0.01							20220127_SR2DLT_Ab
AB01974165	01	Ainno_16251	Ainnocence	AIN1-6_AINNL0006	Lot# MB15NO4106	TC00820831	C014	0.03755	ng/ml	2750	0.94							20220127_SR2DLT_Ab
AB01974165	01	Ainno_16251	Ainnocence	AIN1-6_AINNL0006	Lot# MB15NO4106	TC00820832	C015	0.01188	ng/ml	2025	-0.9							20220127_SR2DLT_Ab
AB01974165	01	Ainno_16251	Ainnocence	AIN1-6_AINNL0006	Lot# MB15NO4106	TC00820831	C015	0.01188	ng/ml	1875	-0.56							20220127_SR2DLT_Ab
AB01974165	01	Ainno_16251	Ainnocence	AIN1-6_AINNL0006	Lot# MB15NO4106	TC00820832	C016	0.00376	ng/ml	2800	0.19							20220127_SR2DLT_Ab
AB01974165	01	Ainno_16251	Ainnocence	AIN1-6_AINNL0006	Lot# MB15NO4106	TC00820831	C016	0.00376	ng/ml	2150	-0.09							20220127_SR2DLT_Ab
AB01974165	01	Ainno_16251	Ainnocence	AIN1-6_AINNL0006	Lot# MB15NO4106	TC00820832	C017	0.00119	ng/ml	2325	-0.48							20220127_SR2DLT_Ab
AB01974165	01	Ainno_16251	Ainnocence	AIN1-6_AINNL0006	Lot# MB15NO4106	TC00820831	C017	0.00119	ng/ml	2600	0.69							20220127_SR2DLT_Ab
AB01974165	01	Ainno_16251	Ainnocence	AIN1-6_AINNL0006	Lot# MB15NO4106	TC00820832	C018	0.0003766	ng/ml	2200	-0.66							20220127_SR2DLT_Ab
AB01974165	01	Ainno_16251	Ainnocence	AIN1-6_AINNL0006	Lot# MB15NO4106	TC00820831	C018	0.0003766	ng/ml	1950	-0.43							20220127_SR2DLT_Ab
AB01974165	01	Ainno_16251	Ainnocence	AIN1-6_AINNL0006	Lot# MB15NO4106	TC00820832	C019	0.0001192	ng/ml	2075	-0.83							20220127_SR2DLT_Ab
AB01974165	01	Ainno_16251	Ainnocence	AIN1-6_AINNL0006	Lot# MB15NO4106	TC00820831	C019	0.0001192	ng/ml	2275	0.13							20220127_SR2DLT_Ab
AB01974165	01	Ainno_16251	Ainnocence	AIN1-6_AINNL0006	Lot# MB15NO4106	TC00820832	C020	3.771e-05	ng/ml	2250	-0.59							20220127_SR2DLT_Ab
AB01974165	01	Ainno_16251	Ainnocence	AIN1-6_AINNL0006	Lot# MB15NO4106	TC00820831	C020	3.771e-05	ng/ml	2300	0.17							20220127_SR2DLT_Ab
AB01974165	01	Ainno_16251	Ainnocence	AIN1-6_AINNL0006	Lot# MB15NO4106	TC00820832	C021	1.193e-05	ng/ml	2425	-0.34							20220127_SR2DLT_Ab
AB01974165	01	Ainno_16251	Ainnocence	AIN1-6_AINNL0006	Lot# MB15NO4106	TC00820831	C021	1.193e-05	ng/ml	2625	0.73							20220127_SR2DLT_Ab
AB01974165	01	Ainno_16251	Ainnocence	AIN1-6_AINNL0006	Lot# MB15NO4106	TC00820832	C022	3.777e-06	ng/ml	2575	-0.13							20220127_SR2DLT_Ab
AB01974165	01	Ainno_16251	Ainnocence	AIN1-6_AINNL0006	Lot# MB15NO4106	TC00820831	C022	3.777e-06	ng/ml	2125	-0.13							20220127_SR2DLT_Ab
AB01974166	01	Ainno_16251	Ainnocence	AIN1-7_AINNL0007	Lot# MB15NO4107	TC00820832	D003	11780	ng/ml	3225	0.78	>11780	Inactive	0.11	0.76	>9999	40	20220127_SR2DLT_Ab
AB01974166	01	Ainno_16251	Ainnocence	AIN1-7_AINNL0007	Lot# MB15NO4107	TC00820831	D003	11780	ng/ml	3550	2.31							20220127_SR2DLT_Ab
AB01974166	01	Ainno_16251	Ainnocence	AIN1-7_AINNL0007	Lot# MB15NO4107	TC00820832	D004	3728	ng/ml	3150	0.68							20220127_SR2DLT_Ab
AB01974166	01	Ainno_16251	Ainnocence	AIN1-7_AINNL0007	Lot# MB15NO4107	TC00820831	D004	3728	ng/ml	2750	0.94							20220127_SR2DLT_Ab
AB01974166	01	Ainno_16251	Ainnocence	AIN1-7_AINNL0007	Lot# MB15NO4107	TC00820832	D005	1180	ng/ml	2650	-0.02							20220127_SR2DLT_Ab
AB01974166	01	Ainno_16251	Ainnocence	AIN1-7_AINNL0007	Lot# MB15NO4107	TC00820831	D005	1180	ng/ml	3450	2.14							20220127_SR2DLT_Ab
AB01974166	01	Ainno_16251	Ainnocence	AIN1-7_AINNL0007	Lot# MB15NO4107	TC00820832	D006	373.3	ng/ml	2075	-0.83							20220127_SR2DLT_Ab
AB01974166	01	Ainno_16251	Ainnocence	AIN1-7_AINNL0007	Lot# MB15NO4107	TC00820831	D006	373.3	ng/ml	3375	2.01							20220127_SR2DLT_Ab
AB01974166	01	Ainno_16251	Ainnocence	AIN1-7_AINNL0007	Lot# MB15NO4107	TC00820832	D007	118.1	ng/ml	2125	-0.76							20220127_SR2DLT_Ab
AB01974166	01	Ainno_16251	Ainnocence	AIN1-7_AINNL0007	Lot# MB15NO4107	TC00820831	D007	118.1	ng/ml	2325	0.21							20220127_SR2DLT_Ab
AB01974166	01	Ainno_16251	Ainnocence	AIN1-7_AINNL0007	Lot# MB15NO4107	TC00820832	D008	37.39	ng/ml	2425	-0.34							20220127_SR2DLT_Ab
AB01974166	01	Ainno_16251	Ainnocence	AIN1-7_AINNL0007	Lot# MB15NO4107	TC00820831	D008	37.39	ng/ml	2575	0.64							20220127_SR2DLT_Ab
AB01974166	01	Ainno_16251	Ainnocence	AIN1-7_AINNL0007	Lot# MB15NO4107	TC00820832	D009	11.83	ng/ml	2850	0.26							20220127_SR2DLT_Ab
AB01974166	01	Ainno_16251	Ainnocence	AIN1-7_AINNL0007	Lot# MB15NO4107	TC00820831	D009	11.83	ng/ml	2325	0.21							20220127_SR2DLT_Ab
AB01974166	01	Ainno_16251	Ainnocence	AIN1-7_AINNL0007	Lot# MB15NO4107	TC00820832	D010	3.744	ng/ml	2600	-0.09							20220127_SR2DLT_Ab
AB01974166	01	Ainno_16251	Ainnocence	AIN1-7_AINNL0007	Lot# MB15NO4107	TC00820831	D010	3.744	ng/ml	2050	-0.26							20220127_SR2DLT_Ab
AB01974166	01	Ainno_16251	Ainnocence	AIN1-7_AINNL0007	Lot# MB15NO4107	TC00820832	D011	1.185	ng/ml	2700	0.05							20220127_SR2DLT_Ab
AB01974166	01	Ainno_16251	Ainnocence	AIN1-7_AINNL0007	Lot# MB15NO4107	TC00820831	D011	1.185	ng/ml	2625	0.73							20220127_SR2DLT_Ab
AB01974166	01	Ainno_16251	Ainnocence	AIN1-7_AINNL0007	Lot# MB15NO4107	TC00820832	D012	0.3749	ng/ml	1925	-1.04							20220127_SR2DLT_Ab
AB01974166	01	Ainno_16251	Ainnocence	AIN1-7_AINNL0007	Lot# MB15NO4107	TC00820831	D012	0.3749	ng/ml	2800	1.03							20220127_SR2DLT_Ab
AB01974166	01	Ainno_16251	Ainnocence	AIN1-7_AINNL0007	Lot# MB15NO4107	TC00820832	D013	0.1187	ng/ml	2875	0.29							20220127_SR2DLT_Ab
AB01974166	01	Ainno_16251	Ainnocence	AIN1-7_AINNL0007	Lot# MB15NO4107	TC00820831	D013	0.1187	ng/ml	2150	-0.09							20220127_SR2DLT_Ab
AB01974166	01	Ainno_16251	Ainnocence	AIN1-7_AINNL0007	Lot# MB15NO4107	TC00820832	D014	0.03755	ng/ml	2625	-0.06							20220127_SR2DLT_Ab
AB01974166	01	Ainno_16251	Ainnocence	AIN1-7_AINNL0007	Lot# MB15NO4107	TC00820831	D014	0.03755	ng/ml	3025	1.41							20220127_SR2DLT_Ab
AB01974166	01	Ainno_16251	Ainnocence	AIN1-7_AINNL0007	Lot# MB15NO4107	TC00820832	D015	0.01188	ng/ml	2575	-0.13							20220127_SR2DLT_Ab
AB01974166	01	Ainno_16251	Ainnocence	AIN1-7_AINNL0007	Lot# MB15NO4107	TC00820831	D015	0.01188	ng/ml	2100	-0.17							20220127_SR2DLT_Ab
AB01974166	01	Ainno_16251	Ainnocence	AIN1-7_AINNL0007	Lot# MB15NO4107	TC00820832	D016	0.00376	ng/ml	2500	-0.23							20220127_SR2DLT_Ab
AB01974166	01	Ainno_16251	Ainnocence	AIN1-7_AINNL0007	Lot# MB15NO4107	TC00820831	D016	0.00376	ng/ml	1950	-0.43							20220127_SR2DLT_Ab
AB01974166	01	Ainno_16251	Ainnocence	AIN1-7_AINNL0007	Lot# MB15NO4107	TC00820832	D017	0.00119	ng/ml	2500	-0.23							20220127_SR2DLT_Ab
AB01974166	01	Ainno_16251	Ainnocence	AIN1-7_AINNL0007	Lot# MB15NO4107	TC00820831	D017	0.00119	ng/ml	2550	0.6							20220127_SR2DLT_Ab
AB01974166	01	Ainno_16251	Ainnocence	AIN1-7_AINNL0007	Lot# MB15NO4107	TC00820832	D018	0.0003766	ng/ml	3025	0.5							20220127_SR2DLT_Ab
AB01974166	01	Ainno_16251	Ainnocence	AIN1-7_AINNL0007	Lot# MB15NO4107	TC00820831	D018	0.0003766	ng/ml	2525	0.56							20220127_SR2DLT_Ab
AB01974166	01	Ainno_16251	Ainnocence	AIN1-7_AINNL0007	Lot# MB15NO4107	TC00820832	D019	0.0001192	ng/ml	1875	-1.11							20220127_SR2DLT_Ab
AB01974166	01	Ainno_16251	Ainnocence	AIN1-7_AINNL0007	Lot# MB15NO4107	TC00820831	D019	0.0001192	ng/ml	2150	-0.09							20220127_SR2DLT_Ab
AB01974166	01	Ainno_16251	Ainnocence	AIN1-7_AINNL0007	Lot# MB15NO4107	TC00820832	D020	3.771e-05	ng/ml	3050	0.54							20220127_SR2DLT_Ab
AB01974166	01	Ainno_16251	Ainnocence	AIN1-7_AINNL0007	Lot# MB15NO4107	TC00820831	D020	3.771e-05	ng/ml	2000	-0.34							20220127_SR2DLT_Ab
AB01974166	01	Ainno_16251	Ainnocence	AIN1-7_AINNL0007	Lot# MB15NO4107	TC00820832	D021	1.193e-05	ng/ml	1875	-1.11							20220127_SR2DLT_Ab
AB01974166	01	Ainno_16251	Ainnocence	AIN1-7_AINNL0007	Lot# MB15NO4107	TC00820831	D021	1.193e-05	ng/ml	2175	-0.04							20220127_SR2DLT_Ab
AB01974166	01	Ainno_16251	Ainnocence	AIN1-7_AINNL0007	Lot# MB15NO4107	TC00820832	D022	3.777e-06	ng/ml	2200	-0.66							20220127_SR2DLT_Ab
AB01974166	01	Ainno_16251	Ainnocence	AIN1-7_AINNL0007	Lot# MB15NO4107	TC00820831	D022	3.777e-06	ng/ml	2475	0.47							20220127_SR2DLT_Ab
AB01974167	01	Ainno_16251	Ainnocence	AIN1-8_AINNL0008	Lot# MB15NO4108	TC00820832	E003	11780	ng/ml	2575	-0.13	>11780	Inactive	-0.34	0.82	0	40	20220127_SR2DLT_Ab
AB01974167	01	Ainno_16251	Ainnocence	AIN1-8_AINNL0008	Lot# MB15NO4108	TC00820831	E003	11780	ng/ml	2750	0.94							20220127_SR2DLT_Ab
AB01974167	01	Ainno_16251	Ainnocence	AIN1-8_AINNL0008	Lot# MB15NO4108	TC00820832	E004	3728	ng/ml	2250	-0.59							20220127_SR2DLT_Ab
AB01974167	01	Ainno_16251	Ainnocence	AIN1-8_AINNL0008	Lot# MB15NO4108	TC00820831	E004	3728	ng/ml	2550	0.6							20220127_SR2DLT_Ab
AB01974167	01	Ainno_16251	Ainnocence	AIN1-8_AINNL0008	Lot# MB15NO4108	TC00820832	E005	1180	ng/ml	2325	-0.48							20220127_SR2DLT_Ab
AB01974167	01	Ainno_16251	Ainnocence	AIN1-8_AINNL0008	Lot# MB15NO4108	TC00820831	E005	1180	ng/ml	1725	-0.81							20220127_SR2DLT_Ab
AB01974167	01	Ainno_16251	Ainnocence	AIN1-8_AINNL0008	Lot# MB15NO4108	TC00820832	E006	373.3	ng/ml	1875	-1.11							20220127_SR2DLT_Ab
AB01974167	01	Ainno_16251	Ainnocence	AIN1-8_AINNL0008	Lot# MB15NO4108	TC00820831	E006	373.3	ng/ml	2325	0.21							20220127_SR2DLT_Ab
AB01974167	01	Ainno_16251	Ainnocence	AIN1-8_AINNL0008	Lot# MB15NO4108	TC00820832	E007	118.1	ng/ml	2175	-0.69							20220127_SR2DLT_Ab
AB01974167	01	Ainno_16251	Ainnocence	AIN1-8_AINNL0008	Lot# MB15NO4108	TC00820831	E007	118.1	ng/ml	2075	-0.21							20220127_SR2DLT_Ab
AB01974167	01	Ainno_16251	Ainnocence	AIN1-8_AINNL0008	Lot# MB15NO4108	TC00820832	E008	37.39	ng/ml	2875	0.29							20220127_SR2DLT_Ab
AB01974167	01	Ainno_16251	Ainnocence	AIN1-8_AINNL0008	Lot# MB15NO4108	TC00820831	E008	37.39	ng/ml	2475	0.47							20220127_SR2DLT_Ab
AB01974167	01	Ainno_16251	Ainnocence	AIN1-8_AINNL0008	Lot# MB15NO4108	TC00820832	E009	11.83	ng/ml	2350	-0.45							20220127_SR2DLT_Ab
AB01974167	01	Ainno_16251	Ainnocence	AIN1-8_AINNL0008	Lot# MB15NO4108	TC00820831	E009	11.83	ng/ml	2975	1.33							20220127_SR2DLT_Ab
AB01974167	01	Ainno_16251	Ainnocence	AIN1-8_AINNL0008	Lot# MB15NO4108	TC00820832	E010	3.744	ng/ml	2575	-0.13							20220127_SR2DLT_Ab
AB01974167	01	Ainno_16251	Ainnocence	AIN1-8_AINNL0008	Lot# MB15NO4108	TC00820831	E010	3.744	ng/ml	2225	0.04							20220127_SR2DLT_Ab
AB01974167	01	Ainno_16251	Ainnocence	AIN1-8_AINNL0008	Lot# MB15NO4108	TC00820832	E011	1.185	ng/ml	2000	-0.94							20220127_SR2DLT_Ab
AB01974167	01	Ainno_16251	Ainnocence	AIN1-8_AINNL0008	Lot# MB15NO4108	TC00820831	E011	1.185	ng/ml	3075	1.5							20220127_SR2DLT_Ab
AB01974167	01	Ainno_16251	Ainnocence	AIN1-8_AINNL0008	Lot# MB15NO4108	TC00820832	E012	0.3749	ng/ml	2450	-0.31							20220127_SR2DLT_Ab
AB01974167	01	Ainno_16251	Ainnocence	AIN1-8_AINNL0008	Lot# MB15NO4108	TC00820831	E012	0.3749	ng/ml	2550	0.6							20220127_SR2DLT_Ab
AB01974167	01	Ainno_16251	Ainnocence	AIN1-8_AINNL0008	Lot# MB15NO4108	TC00820832	E013	0.1187	ng/ml	2200	-0.66							20220127_SR2DLT_Ab
AB01974167	01	Ainno_16251	Ainnocence	AIN1-8_AINNL0008	Lot# MB15NO4108	TC00820831	E013	0.1187	ng/ml	2825	1.07							20220127_SR2DLT_Ab
AB01974167	01	Ainno_16251	Ainnocence	AIN1-8_AINNL0008	Lot# MB15NO4108	TC00820832	E014	0.03755	ng/ml	3175	0.71							20220127_SR2DLT_Ab
AB01974167	01	Ainno_16251	Ainnocence	AIN1-8_AINNL0008	Lot# MB15NO4108	TC00820831	E014	0.03755	ng/ml	3825	2.79							20220127_SR2DLT_Ab
AB01974167	01	Ainno_16251	Ainnocence	AIN1-8_AINNL0008	Lot# MB15NO4108	TC00820832	E015	0.01188	ng/ml	2400	-0.38							20220127_SR2DLT_Ab
AB01974167	01	Ainno_16251	Ainnocence	AIN1-8_AINNL0008	Lot# MB15NO4108	TC00820831	E015	0.01188	ng/ml	3025	1.41							20220127_SR2DLT_Ab
AB01974167	01	Ainno_16251	Ainnocence	AIN1-8_AINNL0008	Lot# MB15NO4108	TC00820832	E016	0.00376	ng/ml	2900	0.33							20220127_SR2DLT_Ab
AB01974167	01	Ainno_16251	Ainnocence	AIN1-8_AINNL0008	Lot# MB15NO4108	TC00820831	E016	0.00376	ng/ml	2150	-0.09							20220127_SR2DLT_Ab
AB01974167	01	Ainno_16251	Ainnocence	AIN1-8_AINNL0008	Lot# MB15NO4108	TC00820832	E017	0.00119	ng/ml	2350	-0.45							20220127_SR2DLT_Ab
AB01974167	01	Ainno_16251	Ainnocence	AIN1-8_AINNL0008	Lot# MB15NO4108	TC00820831	E017	0.00119	ng/ml	2525	0.56							20220127_SR2DLT_Ab
AB01974167	01	Ainno_16251	Ainnocence	AIN1-8_AINNL0008	Lot# MB15NO4108	TC00820832	E018	0.0003766	ng/ml	2675	0.01							20220127_SR2DLT_Ab
AB01974167	01	Ainno_16251	Ainnocence	AIN1-8_AINNL0008	Lot# MB15NO4108	TC00820831	E018	0.0003766	ng/ml	1925	-0.47							20220127_SR2DLT_Ab
AB01974167	01	Ainno_16251	Ainnocence	AIN1-8_AINNL0008	Lot# MB15NO4108	TC00820832	E019	0.0001192	ng/ml	1950	-1.01							20220127_SR2DLT_Ab
AB01974167	01	Ainno_16251	Ainnocence	AIN1-8_AINNL0008	Lot# MB15NO4108	TC00820831	E019	0.0001192	ng/ml	2300	0.17							20220127_SR2DLT_Ab
AB01974167	01	Ainno_16251	Ainnocence	AIN1-8_AINNL0008	Lot# MB15NO4108	TC00820832	E020	3.771e-05	ng/ml	2825	0.22							20220127_SR2DLT_Ab
AB01974167	01	Ainno_16251	Ainnocence	AIN1-8_AINNL0008	Lot# MB15NO4108	TC00820831	E020	3.771e-05	ng/ml	2275	0.13							20220127_SR2DLT_Ab
AB01974167	01	Ainno_16251	Ainnocence	AIN1-8_AINNL0008	Lot# MB15NO4108	TC00820832	E021	1.193e-05	ng/ml	2950	0.4							20220127_SR2DLT_Ab
AB01974167	01	Ainno_16251	Ainnocence	AIN1-8_AINNL0008	Lot# MB15NO4108	TC00820831	E021	1.193e-05	ng/ml	2525	0.56							20220127_SR2DLT_Ab
AB01974167	01	Ainno_16251	Ainnocence	AIN1-8_AINNL0008	Lot# MB15NO4108	TC00820832	E022	3.777e-06	ng/ml	2100	-0.8							20220127_SR2DLT_Ab
AB01974167	01	Ainno_16251	Ainnocence	AIN1-8_AINNL0008	Lot# MB15NO4108	TC00820831	E022	3.777e-06	ng/ml	2525	0.56							20220127_SR2DLT_Ab
AB01974168	01	Ainno_16251	Ainnocence	AIN1-9_AINNL0009	Lot# MB15NO4109	TC00820832	F003	12330	ng/ml	2650	-0.02	>12330	Inactive	1	0.72	>9999	40	20220127_SR2DLT_Ab
AB01974168	01	Ainno_16251	Ainnocence	AIN1-9_AINNL0009	Lot# MB15NO4109	TC00820831	F003	12330	ng/ml	2625	0.73							20220127_SR2DLT_Ab
AB01974168	01	Ainno_16251	Ainnocence	AIN1-9_AINNL0009	Lot# MB15NO4109	TC00820832	F004	3902	ng/ml	2500	-0.23							20220127_SR2DLT_Ab
AB01974168	01	Ainno_16251	Ainnocence	AIN1-9_AINNL0009	Lot# MB15NO4109	TC00820831	F004	3902	ng/ml	2875	1.16							20220127_SR2DLT_Ab
AB01974168	01	Ainno_16251	Ainnocence	AIN1-9_AINNL0009	Lot# MB15NO4109	TC00820832	F005	1235	ng/ml	3300	0.89							20220127_SR2DLT_Ab
AB01974168	01	Ainno_16251	Ainnocence	AIN1-9_AINNL0009	Lot# MB15NO4109	TC00820831	F005	1235	ng/ml	1625	-0.99							20220127_SR2DLT_Ab
AB01974168	01	Ainno_16251	Ainnocence	AIN1-9_AINNL0009	Lot# MB15NO4109	TC00820832	F006	390.8	ng/ml	2200	-0.66							20220127_SR2DLT_Ab
AB01974168	01	Ainno_16251	Ainnocence	AIN1-9_AINNL0009	Lot# MB15NO4109	TC00820831	F006	390.8	ng/ml	2475	0.47							20220127_SR2DLT_Ab
AB01974168	01	Ainno_16251	Ainnocence	AIN1-9_AINNL0009	Lot# MB15NO4109	TC00820832	F007	123.7	ng/ml	2325	-0.48							20220127_SR2DLT_Ab
AB01974168	01	Ainno_16251	Ainnocence	AIN1-9_AINNL0009	Lot# MB15NO4109	TC00820831	F007	123.7	ng/ml	3400	2.06							20220127_SR2DLT_Ab
AB01974168	01	Ainno_16251	Ainnocence	AIN1-9_AINNL0009	Lot# MB15NO4109	TC00820832	F008	39.13	ng/ml	2300	-0.52							20220127_SR2DLT_Ab
AB01974168	01	Ainno_16251	Ainnocence	AIN1-9_AINNL0009	Lot# MB15NO4109	TC00820831	F008	39.13	ng/ml	2450	0.43							20220127_SR2DLT_Ab
AB01974168	01	Ainno_16251	Ainnocence	AIN1-9_AINNL0009	Lot# MB15NO4109	TC00820832	F009	12.38	ng/ml	2825	0.22							20220127_SR2DLT_Ab
AB01974168	01	Ainno_16251	Ainnocence	AIN1-9_AINNL0009	Lot# MB15NO4109	TC00820831	F009	12.38	ng/ml	2800	1.03							20220127_SR2DLT_Ab
AB01974168	01	Ainno_16251	Ainnocence	AIN1-9_AINNL0009	Lot# MB15NO4109	TC00820832	F010	3.919	ng/ml	1850	-1.15							20220127_SR2DLT_Ab
AB01974168	01	Ainno_16251	Ainnocence	AIN1-9_AINNL0009	Lot# MB15NO4109	TC00820831	F010	3.919	ng/ml	2275	0.13							20220127_SR2DLT_Ab
AB01974168	01	Ainno_16251	Ainnocence	AIN1-9_AINNL0009	Lot# MB15NO4109	TC00820832	F011	1.24	ng/ml	2575	-0.13							20220127_SR2DLT_Ab
AB01974168	01	Ainno_16251	Ainnocence	AIN1-9_AINNL0009	Lot# MB15NO4109	TC00820831	F011	1.24	ng/ml	2850	1.11							20220127_SR2DLT_Ab
AB01974168	01	Ainno_16251	Ainnocence	AIN1-9_AINNL0009	Lot# MB15NO4109	TC00820832	F012	0.3924	ng/ml	2050	-0.87							20220127_SR2DLT_Ab
AB01974168	01	Ainno_16251	Ainnocence	AIN1-9_AINNL0009	Lot# MB15NO4109	TC00820831	F012	0.3924	ng/ml	2225	0.04							20220127_SR2DLT_Ab
AB01974168	01	Ainno_16251	Ainnocence	AIN1-9_AINNL0009	Lot# MB15NO4109	TC00820832	F013	0.1242	ng/ml	2450	-0.31							20220127_SR2DLT_Ab
AB01974168	01	Ainno_16251	Ainnocence	AIN1-9_AINNL0009	Lot# MB15NO4109	TC00820831	F013	0.1242	ng/ml	2700	0.86							20220127_SR2DLT_Ab
AB01974168	01	Ainno_16251	Ainnocence	AIN1-9_AINNL0009	Lot# MB15NO4109	TC00820832	F014	0.0393	ng/ml	3425	1.07							20220127_SR2DLT_Ab
AB01974168	01	Ainno_16251	Ainnocence	AIN1-9_AINNL0009	Lot# MB15NO4109	TC00820831	F014	0.0393	ng/ml	2375	0.3							20220127_SR2DLT_Ab
AB01974168	01	Ainno_16251	Ainnocence	AIN1-9_AINNL0009	Lot# MB15NO4109	TC00820832	F015	0.01244	ng/ml	2675	0.01							20220127_SR2DLT_Ab
AB01974168	01	Ainno_16251	Ainnocence	AIN1-9_AINNL0009	Lot# MB15NO4109	TC00820831	F015	0.01244	ng/ml	2200	0							20220127_SR2DLT_Ab
AB01974168	01	Ainno_16251	Ainnocence	AIN1-9_AINNL0009	Lot# MB15NO4109	TC00820832	F016	0.003936	ng/ml	2175	-0.69							20220127_SR2DLT_Ab
AB01974168	01	Ainno_16251	Ainnocence	AIN1-9_AINNL0009	Lot# MB15NO4109	TC00820831	F016	0.003936	ng/ml	2050	-0.26							20220127_SR2DLT_Ab
AB01974168	01	Ainno_16251	Ainnocence	AIN1-9_AINNL0009	Lot# MB15NO4109	TC00820832	F017	0.001246	ng/ml	2400	-0.38							20220127_SR2DLT_Ab
AB01974168	01	Ainno_16251	Ainnocence	AIN1-9_AINNL0009	Lot# MB15NO4109	TC00820831	F017	0.001246	ng/ml	2850	1.11							20220127_SR2DLT_Ab
AB01974168	01	Ainno_16251	Ainnocence	AIN1-9_AINNL0009	Lot# MB15NO4109	TC00820832	F018	0.0003941	ng/ml	2575	-0.13							20220127_SR2DLT_Ab
AB01974168	01	Ainno_16251	Ainnocence	AIN1-9_AINNL0009	Lot# MB15NO4109	TC00820831	F018	0.0003941	ng/ml	2325	0.21							20220127_SR2DLT_Ab
AB01974168	01	Ainno_16251	Ainnocence	AIN1-9_AINNL0009	Lot# MB15NO4109	TC00820832	F019	0.0001247	ng/ml	2950	0.4							20220127_SR2DLT_Ab
AB01974168	01	Ainno_16251	Ainnocence	AIN1-9_AINNL0009	Lot# MB15NO4109	TC00820831	F019	0.0001247	ng/ml	2250	0.09							20220127_SR2DLT_Ab
AB01974168	01	Ainno_16251	Ainnocence	AIN1-9_AINNL0009	Lot# MB15NO4109	TC00820832	F020	3.947e-05	ng/ml	2725	0.08							20220127_SR2DLT_Ab
AB01974168	01	Ainno_16251	Ainnocence	AIN1-9_AINNL0009	Lot# MB15NO4109	TC00820831	F020	3.947e-05	ng/ml	2300	0.17							20220127_SR2DLT_Ab
AB01974168	01	Ainno_16251	Ainnocence	AIN1-9_AINNL0009	Lot# MB15NO4109	TC00820832	F021	1.249e-05	ng/ml	2800	0.19							20220127_SR2DLT_Ab
AB01974168	01	Ainno_16251	Ainnocence	AIN1-9_AINNL0009	Lot# MB15NO4109	TC00820831	F021	1.249e-05	ng/ml	1850	-0.6							20220127_SR2DLT_Ab
AB01974168	01	Ainno_16251	Ainnocence	AIN1-9_AINNL0009	Lot# MB15NO4109	TC00820832	F022	3.953e-06	ng/ml	2975	0.43							20220127_SR2DLT_Ab
AB01974168	01	Ainno_16251	Ainnocence	AIN1-9_AINNL0009	Lot# MB15NO4109	TC00820831	F022	3.953e-06	ng/ml	2750	0.94							20220127_SR2DLT_Ab
AB01974169	01	Ainno_16251	Ainnocence	AIN1-10_AINNL0010	Lot# MB15NO4110	TC00820832	G003	11670	ng/ml	3225	0.78	>11670	Inactive	0.99	0.82	>9999	40	20220127_SR2DLT_Ab
AB01974169	01	Ainno_16251	Ainnocence	AIN1-10_AINNL0010	Lot# MB15NO4110	TC00820831	G003	11670	ng/ml	1825	-0.64							20220127_SR2DLT_Ab
AB01974169	01	Ainno_16251	Ainnocence	AIN1-10_AINNL0010	Lot# MB15NO4110	TC00820832	G004	3693	ng/ml	3450	1.1							20220127_SR2DLT_Ab
AB01974169	01	Ainno_16251	Ainnocence	AIN1-10_AINNL0010	Lot# MB15NO4110	TC00820831	G004	3693	ng/ml	2350	0.26							20220127_SR2DLT_Ab
AB01974169	01	Ainno_16251	Ainnocence	AIN1-10_AINNL0010	Lot# MB15NO4110	TC00820832	G005	1169	ng/ml	2550	-0.16							20220127_SR2DLT_Ab
AB01974169	01	Ainno_16251	Ainnocence	AIN1-10_AINNL0010	Lot# MB15NO4110	TC00820831	G005	1169	ng/ml	2250	0.09							20220127_SR2DLT_Ab
AB01974169	01	Ainno_16251	Ainnocence	AIN1-10_AINNL0010	Lot# MB15NO4110	TC00820832	G006	369.8	ng/ml	2850	0.26							20220127_SR2DLT_Ab
AB01974169	01	Ainno_16251	Ainnocence	AIN1-10_AINNL0010	Lot# MB15NO4110	TC00820831	G006	369.8	ng/ml	2575	0.64							20220127_SR2DLT_Ab
AB01974169	01	Ainno_16251	Ainnocence	AIN1-10_AINNL0010	Lot# MB15NO4110	TC00820832	G007	117	ng/ml	2000	-0.94							20220127_SR2DLT_Ab
AB01974169	01	Ainno_16251	Ainnocence	AIN1-10_AINNL0010	Lot# MB15NO4110	TC00820831	G007	117	ng/ml	2950	1.29							20220127_SR2DLT_Ab
AB01974169	01	Ainno_16251	Ainnocence	AIN1-10_AINNL0010	Lot# MB15NO4110	TC00820832	G008	37.04	ng/ml	2450	-0.31							20220127_SR2DLT_Ab
AB01974169	01	Ainno_16251	Ainnocence	AIN1-10_AINNL0010	Lot# MB15NO4110	TC00820831	G008	37.04	ng/ml	3350	1.97							20220127_SR2DLT_Ab
AB01974169	01	Ainno_16251	Ainnocence	AIN1-10_AINNL0010	Lot# MB15NO4110	TC00820832	G009	11.72	ng/ml	2250	-0.59							20220127_SR2DLT_Ab
AB01974169	01	Ainno_16251	Ainnocence	AIN1-10_AINNL0010	Lot# MB15NO4110	TC00820831	G009	11.72	ng/ml	2575	0.64							20220127_SR2DLT_Ab
AB01974169	01	Ainno_16251	Ainnocence	AIN1-10_AINNL0010	Lot# MB15NO4110	TC00820832	G010	3.709	ng/ml	2775	0.15							20220127_SR2DLT_Ab
AB01974169	01	Ainno_16251	Ainnocence	AIN1-10_AINNL0010	Lot# MB15NO4110	TC00820831	G010	3.709	ng/ml	2800	1.03							20220127_SR2DLT_Ab
AB01974169	01	Ainno_16251	Ainnocence	AIN1-10_AINNL0010	Lot# MB15NO4110	TC00820832	G011	1.174	ng/ml	2775	0.15							20220127_SR2DLT_Ab
AB01974169	01	Ainno_16251	Ainnocence	AIN1-10_AINNL0010	Lot# MB15NO4110	TC00820831	G011	1.174	ng/ml	2025	-0.3							20220127_SR2DLT_Ab
AB01974169	01	Ainno_16251	Ainnocence	AIN1-10_AINNL0010	Lot# MB15NO4110	TC00820832	G012	0.3714	ng/ml	2025	-0.9							20220127_SR2DLT_Ab
AB01974169	01	Ainno_16251	Ainnocence	AIN1-10_AINNL0010	Lot# MB15NO4110	TC00820831	G012	0.3714	ng/ml	1600	-1.03							20220127_SR2DLT_Ab
AB01974169	01	Ainno_16251	Ainnocence	AIN1-10_AINNL0010	Lot# MB15NO4110	TC00820832	G013	0.1175	ng/ml	2025	-0.9							20220127_SR2DLT_Ab
AB01974169	01	Ainno_16251	Ainnocence	AIN1-10_AINNL0010	Lot# MB15NO4110	TC00820831	G013	0.1175	ng/ml	2150	-0.09							20220127_SR2DLT_Ab
AB01974169	01	Ainno_16251	Ainnocence	AIN1-10_AINNL0010	Lot# MB15NO4110	TC00820832	G014	0.0372	ng/ml	2575	-0.13							20220127_SR2DLT_Ab
AB01974169	01	Ainno_16251	Ainnocence	AIN1-10_AINNL0010	Lot# MB15NO4110	TC00820831	G014	0.0372	ng/ml	2275	0.13							20220127_SR2DLT_Ab
AB01974169	01	Ainno_16251	Ainnocence	AIN1-10_AINNL0010	Lot# MB15NO4110	TC00820832	G015	0.01177	ng/ml	2675	0.01							20220127_SR2DLT_Ab
AB01974169	01	Ainno_16251	Ainnocence	AIN1-10_AINNL0010	Lot# MB15NO4110	TC00820831	G015	0.01177	ng/ml	2525	0.56							20220127_SR2DLT_Ab
AB01974169	01	Ainno_16251	Ainnocence	AIN1-10_AINNL0010	Lot# MB15NO4110	TC00820832	G016	0.003725	ng/ml	3175	0.71							20220127_SR2DLT_Ab
AB01974169	01	Ainno_16251	Ainnocence	AIN1-10_AINNL0010	Lot# MB15NO4110	TC00820831	G016	0.003725	ng/ml	2125	-0.13							20220127_SR2DLT_Ab
AB01974169	01	Ainno_16251	Ainnocence	AIN1-10_AINNL0010	Lot# MB15NO4110	TC00820832	G017	0.001179	ng/ml	3800	1.59							20220127_SR2DLT_Ab
AB01974169	01	Ainno_16251	Ainnocence	AIN1-10_AINNL0010	Lot# MB15NO4110	TC00820831	G017	0.001179	ng/ml	1875	-0.56							20220127_SR2DLT_Ab
AB01974169	01	Ainno_16251	Ainnocence	AIN1-10_AINNL0010	Lot# MB15NO4110	TC00820832	G018	0.000373	ng/ml	2925	0.36							20220127_SR2DLT_Ab
AB01974169	01	Ainno_16251	Ainnocence	AIN1-10_AINNL0010	Lot# MB15NO4110	TC00820831	G018	0.000373	ng/ml	3475	2.19							20220127_SR2DLT_Ab
AB01974169	01	Ainno_16251	Ainnocence	AIN1-10_AINNL0010	Lot# MB15NO4110	TC00820832	G019	0.0001181	ng/ml	3100	0.61							20220127_SR2DLT_Ab
AB01974169	01	Ainno_16251	Ainnocence	AIN1-10_AINNL0010	Lot# MB15NO4110	TC00820831	G019	0.0001181	ng/ml	2525	0.56							20220127_SR2DLT_Ab
AB01974169	01	Ainno_16251	Ainnocence	AIN1-10_AINNL0010	Lot# MB15NO4110	TC00820832	G020	3.736e-05	ng/ml	2025	-0.9							20220127_SR2DLT_Ab
AB01974169	01	Ainno_16251	Ainnocence	AIN1-10_AINNL0010	Lot# MB15NO4110	TC00820831	G020	3.736e-05	ng/ml	1750	-0.77							20220127_SR2DLT_Ab
AB01974169	01	Ainno_16251	Ainnocence	AIN1-10_AINNL0010	Lot# MB15NO4110	TC00820832	G021	1.182e-05	ng/ml	2200	-0.66							20220127_SR2DLT_Ab
AB01974169	01	Ainno_16251	Ainnocence	AIN1-10_AINNL0010	Lot# MB15NO4110	TC00820831	G021	1.182e-05	ng/ml	2275	0.13							20220127_SR2DLT_Ab
AB01974169	01	Ainno_16251	Ainnocence	AIN1-10_AINNL0010	Lot# MB15NO4110	TC00820832	G022	3.741e-06	ng/ml	2875	0.29							20220127_SR2DLT_Ab
AB01974169	01	Ainno_16251	Ainnocence	AIN1-10_AINNL0010	Lot# MB15NO4110	TC00820831	G022	3.741e-06	ng/ml	2275	0.13							20220127_SR2DLT_Ab
AB01974170	01	Ainno_16251	Ainnocence	AIN1-18_AINNL0018	Lot# MB15NO4118	TC00820832	H003	11220	ng/ml	2950	0.4	>11220	Inactive	1	1.14	>9999	40	20220127_SR2DLT_Ab
AB01974170	01	Ainno_16251	Ainnocence	AIN1-18_AINNL0018	Lot# MB15NO4118	TC00820831	H003	11220	ng/ml	2050	-0.26							20220127_SR2DLT_Ab
AB01974170	01	Ainno_16251	Ainnocence	AIN1-18_AINNL0018	Lot# MB15NO4118	TC00820832	H004	3551	ng/ml	2650	-0.02							20220127_SR2DLT_Ab
AB01974170	01	Ainno_16251	Ainnocence	AIN1-18_AINNL0018	Lot# MB15NO4118	TC00820831	H004	3551	ng/ml	3925	2.96							20220127_SR2DLT_Ab
AB01974170	01	Ainno_16251	Ainnocence	AIN1-18_AINNL0018	Lot# MB15NO4118	TC00820832	H005	1124	ng/ml	2550	-0.16							20220127_SR2DLT_Ab
AB01974170	01	Ainno_16251	Ainnocence	AIN1-18_AINNL0018	Lot# MB15NO4118	TC00820831	H005	1124	ng/ml	2325	0.21							20220127_SR2DLT_Ab
AB01974170	01	Ainno_16251	Ainnocence	AIN1-18_AINNL0018	Lot# MB15NO4118	TC00820832	H006	355.6	ng/ml	2700	0.05							20220127_SR2DLT_Ab
AB01974170	01	Ainno_16251	Ainnocence	AIN1-18_AINNL0018	Lot# MB15NO4118	TC00820831	H006	355.6	ng/ml	2650	0.77							20220127_SR2DLT_Ab
AB01974170	01	Ainno_16251	Ainnocence	AIN1-18_AINNL0018	Lot# MB15NO4118	TC00820832	H007	112.5	ng/ml	2375	-0.41							20220127_SR2DLT_Ab
AB01974170	01	Ainno_16251	Ainnocence	AIN1-18_AINNL0018	Lot# MB15NO4118	TC00820831	H007	112.5	ng/ml	3075	1.5							20220127_SR2DLT_Ab
AB01974170	01	Ainno_16251	Ainnocence	AIN1-18_AINNL0018	Lot# MB15NO4118	TC00820832	H008	35.61	ng/ml	2475	-0.27							20220127_SR2DLT_Ab
AB01974170	01	Ainno_16251	Ainnocence	AIN1-18_AINNL0018	Lot# MB15NO4118	TC00820831	H008	35.61	ng/ml	3200	1.71							20220127_SR2DLT_Ab
AB01974170	01	Ainno_16251	Ainnocence	AIN1-18_AINNL0018	Lot# MB15NO4118	TC00820832	H009	11.27	ng/ml	3275	0.85							20220127_SR2DLT_Ab
AB01974170	01	Ainno_16251	Ainnocence	AIN1-18_AINNL0018	Lot# MB15NO4118	TC00820831	H009	11.27	ng/ml	2825	1.07							20220127_SR2DLT_Ab
AB01974170	01	Ainno_16251	Ainnocence	AIN1-18_AINNL0018	Lot# MB15NO4118	TC00820832	H010	3.566	ng/ml	2600	-0.09							20220127_SR2DLT_Ab
AB01974170	01	Ainno_16251	Ainnocence	AIN1-18_AINNL0018	Lot# MB15NO4118	TC00820831	H010	3.566	ng/ml	2325	0.21							20220127_SR2DLT_Ab
AB01974170	01	Ainno_16251	Ainnocence	AIN1-18_AINNL0018	Lot# MB15NO4118	TC00820832	H011	1.128	ng/ml	3425	1.07							20220127_SR2DLT_Ab
AB01974170	01	Ainno_16251	Ainnocence	AIN1-18_AINNL0018	Lot# MB15NO4118	TC00820831	H011	1.128	ng/ml	2900	1.2							20220127_SR2DLT_Ab
AB01974170	01	Ainno_16251	Ainnocence	AIN1-18_AINNL0018	Lot# MB15NO4118	TC00820832	H012	0.3571	ng/ml	2850	0.26							20220127_SR2DLT_Ab
AB01974170	01	Ainno_16251	Ainnocence	AIN1-18_AINNL0018	Lot# MB15NO4118	TC00820831	H012	0.3571	ng/ml	3700	2.57							20220127_SR2DLT_Ab
AB01974170	01	Ainno_16251	Ainnocence	AIN1-18_AINNL0018	Lot# MB15NO4118	TC00820832	H013	0.113	ng/ml	3525	1.21							20220127_SR2DLT_Ab
AB01974170	01	Ainno_16251	Ainnocence	AIN1-18_AINNL0018	Lot# MB15NO4118	TC00820831	H013	0.113	ng/ml	3500	2.23							20220127_SR2DLT_Ab
AB01974170	01	Ainno_16251	Ainnocence	AIN1-18_AINNL0018	Lot# MB15NO4118	TC00820832	H014	0.03576	ng/ml	3075	0.57							20220127_SR2DLT_Ab
AB01974170	01	Ainno_16251	Ainnocence	AIN1-18_AINNL0018	Lot# MB15NO4118	TC00820831	H014	0.03576	ng/ml	2025	-0.3							20220127_SR2DLT_Ab
AB01974170	01	Ainno_16251	Ainnocence	AIN1-18_AINNL0018	Lot# MB15NO4118	TC00820832	H015	0.01132	ng/ml	2500	-0.23							20220127_SR2DLT_Ab
AB01974170	01	Ainno_16251	Ainnocence	AIN1-18_AINNL0018	Lot# MB15NO4118	TC00820831	H015	0.01132	ng/ml	3025	1.41							20220127_SR2DLT_Ab
AB01974170	01	Ainno_16251	Ainnocence	AIN1-18_AINNL0018	Lot# MB15NO4118	TC00820832	H016	0.003581	ng/ml	2725	0.08							20220127_SR2DLT_Ab
AB01974170	01	Ainno_16251	Ainnocence	AIN1-18_AINNL0018	Lot# MB15NO4118	TC00820831	H016	0.003581	ng/ml	2300	0.17							20220127_SR2DLT_Ab
AB01974170	01	Ainno_16251	Ainnocence	AIN1-18_AINNL0018	Lot# MB15NO4118	TC00820832	H017	0.001133	ng/ml	2350	-0.45							20220127_SR2DLT_Ab
AB01974170	01	Ainno_16251	Ainnocence	AIN1-18_AINNL0018	Lot# MB15NO4118	TC00820831	H017	0.001133	ng/ml	3025	1.41							20220127_SR2DLT_Ab
AB01974170	01	Ainno_16251	Ainnocence	AIN1-18_AINNL0018	Lot# MB15NO4118	TC00820832	H018	0.0003587	ng/ml	3075	0.57							20220127_SR2DLT_Ab
AB01974170	01	Ainno_16251	Ainnocence	AIN1-18_AINNL0018	Lot# MB15NO4118	TC00820831	H018	0.0003587	ng/ml	3300	1.89							20220127_SR2DLT_Ab
AB01974170	01	Ainno_16251	Ainnocence	AIN1-18_AINNL0018	Lot# MB15NO4118	TC00820832	H019	0.0001135	ng/ml	2475	-0.27							20220127_SR2DLT_Ab
AB01974170	01	Ainno_16251	Ainnocence	AIN1-18_AINNL0018	Lot# MB15NO4118	TC00820831	H019	0.0001135	ng/ml	2625	0.73							20220127_SR2DLT_Ab
AB01974170	01	Ainno_16251	Ainnocence	AIN1-18_AINNL0018	Lot# MB15NO4118	TC00820832	H020	3.592e-05	ng/ml	2100	-0.8							20220127_SR2DLT_Ab
AB01974170	01	Ainno_16251	Ainnocence	AIN1-18_AINNL0018	Lot# MB15NO4118	TC00820831	H020	3.592e-05	ng/ml	2975	1.33							20220127_SR2DLT_Ab
AB01974170	01	Ainno_16251	Ainnocence	AIN1-18_AINNL0018	Lot# MB15NO4118	TC00820832	H021	1.137e-05	ng/ml	2525	-0.2							20220127_SR2DLT_Ab
AB01974170	01	Ainno_16251	Ainnocence	AIN1-18_AINNL0018	Lot# MB15NO4118	TC00820831	H021	1.137e-05	ng/ml	3450	2.14							20220127_SR2DLT_Ab
AB01974170	01	Ainno_16251	Ainnocence	AIN1-18_AINNL0018	Lot# MB15NO4118	TC00820832	H022	3.597e-06	ng/ml	2500	-0.23							20220127_SR2DLT_Ab
AB01974170	01	Ainno_16251	Ainnocence	AIN1-18_AINNL0018	Lot# MB15NO4118	TC00820831	H022	3.597e-06	ng/ml	2425	0.39							20220127_SR2DLT_Ab
AB01974171	01	Ainno_16251	Ainnocence	AIN1-21_AINNL0021	Lot# MB15NO4121	TC00820832	I003	11000	ng/ml	3150	0.68	>11000	Inactive	0.99	0.92	>9999	40	20220127_SR2DLT_Ab
AB01974171	01	Ainno_16251	Ainnocence	AIN1-21_AINNL0021	Lot# MB15NO4121	TC00820831	I003	11000	ng/ml	2000	-0.34							20220127_SR2DLT_Ab
AB01974171	01	Ainno_16251	Ainnocence	AIN1-21_AINNL0021	Lot# MB15NO4121	TC00820832	I004	3481	ng/ml	2550	-0.16							20220127_SR2DLT_Ab
AB01974171	01	Ainno_16251	Ainnocence	AIN1-21_AINNL0021	Lot# MB15NO4121	TC00820831	I004	3481	ng/ml	2625	0.73							20220127_SR2DLT_Ab
AB01974171	01	Ainno_16251	Ainnocence	AIN1-21_AINNL0021	Lot# MB15NO4121	TC00820832	I005	1102	ng/ml	2350	-0.45							20220127_SR2DLT_Ab
AB01974171	01	Ainno_16251	Ainnocence	AIN1-21_AINNL0021	Lot# MB15NO4121	TC00820831	I005	1102	ng/ml	3200	1.71							20220127_SR2DLT_Ab
AB01974171	01	Ainno_16251	Ainnocence	AIN1-21_AINNL0021	Lot# MB15NO4121	TC00820832	I006	348.6	ng/ml	2750	0.12							20220127_SR2DLT_Ab
AB01974171	01	Ainno_16251	Ainnocence	AIN1-21_AINNL0021	Lot# MB15NO4121	TC00820831	I006	348.6	ng/ml	3275	1.84							20220127_SR2DLT_Ab
AB01974171	01	Ainno_16251	Ainnocence	AIN1-21_AINNL0021	Lot# MB15NO4121	TC00820832	I007	110.3	ng/ml	2900	0.33							20220127_SR2DLT_Ab
AB01974171	01	Ainno_16251	Ainnocence	AIN1-21_AINNL0021	Lot# MB15NO4121	TC00820831	I007	110.3	ng/ml	3875	2.87							20220127_SR2DLT_Ab
AB01974171	01	Ainno_16251	Ainnocence	AIN1-21_AINNL0021	Lot# MB15NO4121	TC00820832	I008	34.91	ng/ml	2175	-0.69							20220127_SR2DLT_Ab
AB01974171	01	Ainno_16251	Ainnocence	AIN1-21_AINNL0021	Lot# MB15NO4121	TC00820831	I008	34.91	ng/ml	2725	0.9							20220127_SR2DLT_Ab
AB01974171	01	Ainno_16251	Ainnocence	AIN1-21_AINNL0021	Lot# MB15NO4121	TC00820832	I009	11.05	ng/ml	2150	-0.73							20220127_SR2DLT_Ab
AB01974171	01	Ainno_16251	Ainnocence	AIN1-21_AINNL0021	Lot# MB15NO4121	TC00820831	I009	11.05	ng/ml	1775	-0.73							20220127_SR2DLT_Ab
AB01974171	01	Ainno_16251	Ainnocence	AIN1-21_AINNL0021	Lot# MB15NO4121	TC00820832	I010	3.496	ng/ml	2850	0.26							20220127_SR2DLT_Ab
AB01974171	01	Ainno_16251	Ainnocence	AIN1-21_AINNL0021	Lot# MB15NO4121	TC00820831	I010	3.496	ng/ml	2350	0.26							20220127_SR2DLT_Ab
AB01974171	01	Ainno_16251	Ainnocence	AIN1-21_AINNL0021	Lot# MB15NO4121	TC00820832	I011	1.106	ng/ml	2550	-0.16							20220127_SR2DLT_Ab
AB01974171	01	Ainno_16251	Ainnocence	AIN1-21_AINNL0021	Lot# MB15NO4121	TC00820831	I011	1.106	ng/ml	2700	0.86							20220127_SR2DLT_Ab
AB01974171	01	Ainno_16251	Ainnocence	AIN1-21_AINNL0021	Lot# MB15NO4121	TC00820832	I012	0.3501	ng/ml	3400	1.03							20220127_SR2DLT_Ab
AB01974171	01	Ainno_16251	Ainnocence	AIN1-21_AINNL0021	Lot# MB15NO4121	TC00820831	I012	0.3501	ng/ml	2675	0.81							20220127_SR2DLT_Ab
AB01974171	01	Ainno_16251	Ainnocence	AIN1-21_AINNL0021	Lot# MB15NO4121	TC00820832	I013	0.1108	ng/ml	2625	-0.06							20220127_SR2DLT_Ab
AB01974171	01	Ainno_16251	Ainnocence	AIN1-21_AINNL0021	Lot# MB15NO4121	TC00820831	I013	0.1108	ng/ml	2600	0.69							20220127_SR2DLT_Ab
AB01974171	01	Ainno_16251	Ainnocence	AIN1-21_AINNL0021	Lot# MB15NO4121	TC00820832	I014	0.03506	ng/ml	2700	0.05							20220127_SR2DLT_Ab
AB01974171	01	Ainno_16251	Ainnocence	AIN1-21_AINNL0021	Lot# MB15NO4121	TC00820831	I014	0.03506	ng/ml	3400	2.06							20220127_SR2DLT_Ab
AB01974171	01	Ainno_16251	Ainnocence	AIN1-21_AINNL0021	Lot# MB15NO4121	TC00820832	I015	0.0111	ng/ml	2325	-0.48							20220127_SR2DLT_Ab
AB01974171	01	Ainno_16251	Ainnocence	AIN1-21_AINNL0021	Lot# MB15NO4121	TC00820831	I015	0.0111	ng/ml	2150	-0.09							20220127_SR2DLT_Ab
AB01974171	01	Ainno_16251	Ainnocence	AIN1-21_AINNL0021	Lot# MB15NO4121	TC00820832	I016	0.003511	ng/ml	2275	-0.55							20220127_SR2DLT_Ab
AB01974171	01	Ainno_16251	Ainnocence	AIN1-21_AINNL0021	Lot# MB15NO4121	TC00820831	I016	0.003511	ng/ml	2150	-0.09							20220127_SR2DLT_Ab
AB01974171	01	Ainno_16251	Ainnocence	AIN1-21_AINNL0021	Lot# MB15NO4121	TC00820832	I017	0.001111	ng/ml	2775	0.15							20220127_SR2DLT_Ab
AB01974171	01	Ainno_16251	Ainnocence	AIN1-21_AINNL0021	Lot# MB15NO4121	TC00820831	I017	0.001111	ng/ml	1875	-0.56							20220127_SR2DLT_Ab
AB01974171	01	Ainno_16251	Ainnocence	AIN1-21_AINNL0021	Lot# MB15NO4121	TC00820832	I018	0.0003516	ng/ml	2350	-0.45							20220127_SR2DLT_Ab
AB01974171	01	Ainno_16251	Ainnocence	AIN1-21_AINNL0021	Lot# MB15NO4121	TC00820831	I018	0.0003516	ng/ml	2800	1.03							20220127_SR2DLT_Ab
AB01974171	01	Ainno_16251	Ainnocence	AIN1-21_AINNL0021	Lot# MB15NO4121	TC00820832	I019	0.0001113	ng/ml	3350	0.96							20220127_SR2DLT_Ab
AB01974171	01	Ainno_16251	Ainnocence	AIN1-21_AINNL0021	Lot# MB15NO4121	TC00820831	I019	0.0001113	ng/ml	3075	1.5							20220127_SR2DLT_Ab
AB01974171	01	Ainno_16251	Ainnocence	AIN1-21_AINNL0021	Lot# MB15NO4121	TC00820832	I020	3.521e-05	ng/ml	2950	0.4							20220127_SR2DLT_Ab
AB01974171	01	Ainno_16251	Ainnocence	AIN1-21_AINNL0021	Lot# MB15NO4121	TC00820831	I020	3.521e-05	ng/ml	1975	-0.39							20220127_SR2DLT_Ab
AB01974171	01	Ainno_16251	Ainnocence	AIN1-21_AINNL0021	Lot# MB15NO4121	TC00820832	I021	1.114e-05	ng/ml	2300	-0.52							20220127_SR2DLT_Ab
AB01974171	01	Ainno_16251	Ainnocence	AIN1-21_AINNL0021	Lot# MB15NO4121	TC00820831	I021	1.114e-05	ng/ml	2225	0.04							20220127_SR2DLT_Ab
AB01974171	01	Ainno_16251	Ainnocence	AIN1-21_AINNL0021	Lot# MB15NO4121	TC00820832	I022	3.526e-06	ng/ml	2975	0.43							20220127_SR2DLT_Ab
AB01974171	01	Ainno_16251	Ainnocence	AIN1-21_AINNL0021	Lot# MB15NO4121	TC00820831	I022	3.526e-06	ng/ml	2225	0.04							20220127_SR2DLT_Ab
AB01974172	01	Ainno_16251	Ainnocence	AIN1-22_AINNL0022	Lot# MB15NO4122	TC00820832	J003	10220	ng/ml	2275	-0.55	>10220	Inactive	-0.18	0.9	0	40	20220127_SR2DLT_Ab
AB01974172	01	Ainno_16251	Ainnocence	AIN1-22_AINNL0022	Lot# MB15NO4122	TC00820831	J003	10220	ng/ml	2100	-0.17							20220127_SR2DLT_Ab
AB01974172	01	Ainno_16251	Ainnocence	AIN1-22_AINNL0022	Lot# MB15NO4122	TC00820832	J004	3234	ng/ml	2100	-0.8							20220127_SR2DLT_Ab
AB01974172	01	Ainno_16251	Ainnocence	AIN1-22_AINNL0022	Lot# MB15NO4122	TC00820831	J004	3234	ng/ml	2450	0.43							20220127_SR2DLT_Ab
AB01974172	01	Ainno_16251	Ainnocence	AIN1-22_AINNL0022	Lot# MB15NO4122	TC00820832	J005	1023	ng/ml	2525	-0.2							20220127_SR2DLT_Ab
AB01974172	01	Ainno_16251	Ainnocence	AIN1-22_AINNL0022	Lot# MB15NO4122	TC00820831	J005	1023	ng/ml	2225	0.04							20220127_SR2DLT_Ab
AB01974172	01	Ainno_16251	Ainnocence	AIN1-22_AINNL0022	Lot# MB15NO4122	TC00820832	J006	323.9	ng/ml	2825	0.22							20220127_SR2DLT_Ab
AB01974172	01	Ainno_16251	Ainnocence	AIN1-22_AINNL0022	Lot# MB15NO4122	TC00820831	J006	323.9	ng/ml	2375	0.3							20220127_SR2DLT_Ab
AB01974172	01	Ainno_16251	Ainnocence	AIN1-22_AINNL0022	Lot# MB15NO4122	TC00820832	J007	102.5	ng/ml	2925	0.36							20220127_SR2DLT_Ab
AB01974172	01	Ainno_16251	Ainnocence	AIN1-22_AINNL0022	Lot# MB15NO4122	TC00820831	J007	102.5	ng/ml	2425	0.39							20220127_SR2DLT_Ab
AB01974172	01	Ainno_16251	Ainnocence	AIN1-22_AINNL0022	Lot# MB15NO4122	TC00820832	J008	32.44	ng/ml	2350	-0.45							20220127_SR2DLT_Ab
AB01974172	01	Ainno_16251	Ainnocence	AIN1-22_AINNL0022	Lot# MB15NO4122	TC00820831	J008	32.44	ng/ml	2575	0.64							20220127_SR2DLT_Ab
AB01974172	01	Ainno_16251	Ainnocence	AIN1-22_AINNL0022	Lot# MB15NO4122	TC00820832	J009	10.26	ng/ml	1925	-1.04							20220127_SR2DLT_Ab
AB01974172	01	Ainno_16251	Ainnocence	AIN1-22_AINNL0022	Lot# MB15NO4122	TC00820831	J009	10.26	ng/ml	2350	0.26							20220127_SR2DLT_Ab
AB01974172	01	Ainno_16251	Ainnocence	AIN1-22_AINNL0022	Lot# MB15NO4122	TC00820832	J010	3.248	ng/ml	2925	0.36							20220127_SR2DLT_Ab
AB01974172	01	Ainno_16251	Ainnocence	AIN1-22_AINNL0022	Lot# MB15NO4122	TC00820831	J010	3.248	ng/ml	3875	2.87							20220127_SR2DLT_Ab
AB01974172	01	Ainno_16251	Ainnocence	AIN1-22_AINNL0022	Lot# MB15NO4122	TC00820832	J011	1.028	ng/ml	2825	0.22							20220127_SR2DLT_Ab
AB01974172	01	Ainno_16251	Ainnocence	AIN1-22_AINNL0022	Lot# MB15NO4122	TC00820831	J011	1.028	ng/ml	3425	2.1							20220127_SR2DLT_Ab
AB01974172	01	Ainno_16251	Ainnocence	AIN1-22_AINNL0022	Lot# MB15NO4122	TC00820832	J012	0.3253	ng/ml	2350	-0.45							20220127_SR2DLT_Ab
AB01974172	01	Ainno_16251	Ainnocence	AIN1-22_AINNL0022	Lot# MB15NO4122	TC00820831	J012	0.3253	ng/ml	3050	1.46							20220127_SR2DLT_Ab
AB01974172	01	Ainno_16251	Ainnocence	AIN1-22_AINNL0022	Lot# MB15NO4122	TC00820832	J013	0.1029	ng/ml	3525	1.21							20220127_SR2DLT_Ab
AB01974172	01	Ainno_16251	Ainnocence	AIN1-22_AINNL0022	Lot# MB15NO4122	TC00820831	J013	0.1029	ng/ml	2600	0.69							20220127_SR2DLT_Ab
AB01974172	01	Ainno_16251	Ainnocence	AIN1-22_AINNL0022	Lot# MB15NO4122	TC00820832	J014	0.03258	ng/ml	3100	0.61							20220127_SR2DLT_Ab
AB01974172	01	Ainno_16251	Ainnocence	AIN1-22_AINNL0022	Lot# MB15NO4122	TC00820831	J014	0.03258	ng/ml	3200	1.71							20220127_SR2DLT_Ab
AB01974172	01	Ainno_16251	Ainnocence	AIN1-22_AINNL0022	Lot# MB15NO4122	TC00820832	J015	0.01031	ng/ml	2375	-0.41							20220127_SR2DLT_Ab
AB01974172	01	Ainno_16251	Ainnocence	AIN1-22_AINNL0022	Lot# MB15NO4122	TC00820831	J015	0.01031	ng/ml	2800	1.03							20220127_SR2DLT_Ab
AB01974172	01	Ainno_16251	Ainnocence	AIN1-22_AINNL0022	Lot# MB15NO4122	TC00820832	J016	0.003262	ng/ml	3275	0.85							20220127_SR2DLT_Ab
AB01974172	01	Ainno_16251	Ainnocence	AIN1-22_AINNL0022	Lot# MB15NO4122	TC00820831	J016	0.003262	ng/ml	2850	1.11							20220127_SR2DLT_Ab
AB01974172	01	Ainno_16251	Ainnocence	AIN1-22_AINNL0022	Lot# MB15NO4122	TC00820832	J017	0.001032	ng/ml	2600	-0.09							20220127_SR2DLT_Ab
AB01974172	01	Ainno_16251	Ainnocence	AIN1-22_AINNL0022	Lot# MB15NO4122	TC00820831	J017	0.001032	ng/ml	2800	1.03							20220127_SR2DLT_Ab
AB01974172	01	Ainno_16251	Ainnocence	AIN1-22_AINNL0022	Lot# MB15NO4122	TC00820832	J018	0.0003267	ng/ml	3800	1.59							20220127_SR2DLT_Ab
AB01974172	01	Ainno_16251	Ainnocence	AIN1-22_AINNL0022	Lot# MB15NO4122	TC00820831	J018	0.0003267	ng/ml	2550	0.6							20220127_SR2DLT_Ab
AB01974172	01	Ainno_16251	Ainnocence	AIN1-22_AINNL0022	Lot# MB15NO4122	TC00820832	J019	0.0001034	ng/ml	2750	0.12							20220127_SR2DLT_Ab
AB01974172	01	Ainno_16251	Ainnocence	AIN1-22_AINNL0022	Lot# MB15NO4122	TC00820831	J019	0.0001034	ng/ml	2550	0.6							20220127_SR2DLT_Ab
AB01974172	01	Ainno_16251	Ainnocence	AIN1-22_AINNL0022	Lot# MB15NO4122	TC00820832	J020	3.272e-05	ng/ml	3350	0.96							20220127_SR2DLT_Ab
AB01974172	01	Ainno_16251	Ainnocence	AIN1-22_AINNL0022	Lot# MB15NO4122	TC00820831	J020	3.272e-05	ng/ml	3375	2.01							20220127_SR2DLT_Ab
AB01974172	01	Ainno_16251	Ainnocence	AIN1-22_AINNL0022	Lot# MB15NO4122	TC00820832	J021	1.035e-05	ng/ml	2025	-0.9							20220127_SR2DLT_Ab
AB01974172	01	Ainno_16251	Ainnocence	AIN1-22_AINNL0022	Lot# MB15NO4122	TC00820831	J021	1.035e-05	ng/ml	3175	1.67							20220127_SR2DLT_Ab
AB01974172	01	Ainno_16251	Ainnocence	AIN1-22_AINNL0022	Lot# MB15NO4122	TC00820832	J022	3.276e-06	ng/ml	3325	0.92							20220127_SR2DLT_Ab
AB01974172	01	Ainno_16251	Ainnocence	AIN1-22_AINNL0022	Lot# MB15NO4122	TC00820831	J022	3.276e-06	ng/ml	2475	0.47							20220127_SR2DLT_Ab
AB01974173	01	Ainno_16251	Ainnocence	AIN1-26_AINNL0026	Lot# MB15NO4126	TC00820832	K003	10890	ng/ml	2525	-0.2	>10890	Inactive	1	1.11		40	20220127_SR2DLT_Ab
AB01974173	01	Ainno_16251	Ainnocence	AIN1-26_AINNL0026	Lot# MB15NO4126	TC00820831	K003	10890	ng/ml	2400	0.34							20220127_SR2DLT_Ab
AB01974173	01	Ainno_16251	Ainnocence	AIN1-26_AINNL0026	Lot# MB15NO4126	TC00820832	K004	3446	ng/ml	2900	0.33							20220127_SR2DLT_Ab
AB01974173	01	Ainno_16251	Ainnocence	AIN1-26_AINNL0026	Lot# MB15NO4126	TC00820831	K004	3446	ng/ml	2400	0.34							20220127_SR2DLT_Ab
AB01974173	01	Ainno_16251	Ainnocence	AIN1-26_AINNL0026	Lot# MB15NO4126	TC00820832	K005	1091	ng/ml	2275	-0.55							20220127_SR2DLT_Ab
AB01974173	01	Ainno_16251	Ainnocence	AIN1-26_AINNL0026	Lot# MB15NO4126	TC00820831	K005	1091	ng/ml	2825	1.07							20220127_SR2DLT_Ab
AB01974173	01	Ainno_16251	Ainnocence	AIN1-26_AINNL0026	Lot# MB15NO4126	TC00820832	K006	345.1	ng/ml	2775	0.15							20220127_SR2DLT_Ab
AB01974173	01	Ainno_16251	Ainnocence	AIN1-26_AINNL0026	Lot# MB15NO4126	TC00820831	K006	345.1	ng/ml	2350	0.26							20220127_SR2DLT_Ab
AB01974173	01	Ainno_16251	Ainnocence	AIN1-26_AINNL0026	Lot# MB15NO4126	TC00820832	K007	109.2	ng/ml	2650	-0.02							20220127_SR2DLT_Ab
AB01974173	01	Ainno_16251	Ainnocence	AIN1-26_AINNL0026	Lot# MB15NO4126	TC00820831	K007	109.2	ng/ml	2375	0.3							20220127_SR2DLT_Ab
AB01974173	01	Ainno_16251	Ainnocence	AIN1-26_AINNL0026	Lot# MB15NO4126	TC00820832	K008	34.56	ng/ml	2800	0.19							20220127_SR2DLT_Ab
AB01974173	01	Ainno_16251	Ainnocence	AIN1-26_AINNL0026	Lot# MB15NO4126	TC00820831	K008	34.56	ng/ml	3525	2.27							20220127_SR2DLT_Ab
AB01974173	01	Ainno_16251	Ainnocence	AIN1-26_AINNL0026	Lot# MB15NO4126	TC00820832	K009	10.94	ng/ml	2275	-0.55							20220127_SR2DLT_Ab
AB01974173	01	Ainno_16251	Ainnocence	AIN1-26_AINNL0026	Lot# MB15NO4126	TC00820831	K009	10.94	ng/ml	3225	1.76							20220127_SR2DLT_Ab
AB01974173	01	Ainno_16251	Ainnocence	AIN1-26_AINNL0026	Lot# MB15NO4126	TC00820832	K010	3.461	ng/ml	3275	0.85							20220127_SR2DLT_Ab
AB01974173	01	Ainno_16251	Ainnocence	AIN1-26_AINNL0026	Lot# MB15NO4126	TC00820831	K010	3.461	ng/ml	3375	2.01							20220127_SR2DLT_Ab
AB01974173	01	Ainno_16251	Ainnocence	AIN1-26_AINNL0026	Lot# MB15NO4126	TC00820832	K011	1.095	ng/ml	2400	-0.38							20220127_SR2DLT_Ab
AB01974173	01	Ainno_16251	Ainnocence	AIN1-26_AINNL0026	Lot# MB15NO4126	TC00820831	K011	1.095	ng/ml	2425	0.39							20220127_SR2DLT_Ab
AB01974173	01	Ainno_16251	Ainnocence	AIN1-26_AINNL0026	Lot# MB15NO4126	TC00820832	K012	0.3466	ng/ml	4525	2.61							20220127_SR2DLT_Ab
AB01974173	01	Ainno_16251	Ainnocence	AIN1-26_AINNL0026	Lot# MB15NO4126	TC00820831	K012	0.3466	ng/ml	3275	1.84							20220127_SR2DLT_Ab
AB01974173	01	Ainno_16251	Ainnocence	AIN1-26_AINNL0026	Lot# MB15NO4126	TC00820832	K013	0.1097	ng/ml	2500	-0.23							20220127_SR2DLT_Ab
AB01974173	01	Ainno_16251	Ainnocence	AIN1-26_AINNL0026	Lot# MB15NO4126	TC00820831	K013	0.1097	ng/ml	3075	1.5							20220127_SR2DLT_Ab
AB01974173	01	Ainno_16251	Ainnocence	AIN1-26_AINNL0026	Lot# MB15NO4126	TC00820832	K014	0.03471	ng/ml	2300	-0.52							20220127_SR2DLT_Ab
AB01974173	01	Ainno_16251	Ainnocence	AIN1-26_AINNL0026	Lot# MB15NO4126	TC00820831	K014	0.03471	ng/ml	3150	1.63							20220127_SR2DLT_Ab
AB01974173	01	Ainno_16251	Ainnocence	AIN1-26_AINNL0026	Lot# MB15NO4126	TC00820832	K015	0.01098	ng/ml	3050	0.54							20220127_SR2DLT_Ab
AB01974173	01	Ainno_16251	Ainnocence	AIN1-26_AINNL0026	Lot# MB15NO4126	TC00820831	K015	0.01098	ng/ml	2850	1.11							20220127_SR2DLT_Ab
AB01974173	01	Ainno_16251	Ainnocence	AIN1-26_AINNL0026	Lot# MB15NO4126	TC00820832	K016	0.003476	ng/ml	2400	-0.38							20220127_SR2DLT_Ab
AB01974173	01	Ainno_16251	Ainnocence	AIN1-26_AINNL0026	Lot# MB15NO4126	TC00820831	K016	0.003476	ng/ml	2175	-0.04							20220127_SR2DLT_Ab
AB01974173	01	Ainno_16251	Ainnocence	AIN1-26_AINNL0026	Lot# MB15NO4126	TC00820832	K017	0.0011	ng/ml	4000	1.87							20220127_SR2DLT_Ab
AB01974173	01	Ainno_16251	Ainnocence	AIN1-26_AINNL0026	Lot# MB15NO4126	TC00820831	K017	0.0011	ng/ml	2275	0.13							20220127_SR2DLT_Ab
AB01974173	01	Ainno_16251	Ainnocence	AIN1-26_AINNL0026	Lot# MB15NO4126	TC00820832	K018	0.0003481	ng/ml	2650	-0.02							20220127_SR2DLT_Ab
AB01974173	01	Ainno_16251	Ainnocence	AIN1-26_AINNL0026	Lot# MB15NO4126	TC00820831	K018	0.0003481	ng/ml	3700	2.57							20220127_SR2DLT_Ab
AB01974173	01	Ainno_16251	Ainnocence	AIN1-26_AINNL0026	Lot# MB15NO4126	TC00820832	K019	0.0001102	ng/ml	2300	-0.52							20220127_SR2DLT_Ab
AB01974173	01	Ainno_16251	Ainnocence	AIN1-26_AINNL0026	Lot# MB15NO4126	TC00820831	K019	0.0001102	ng/ml	2425	0.39							20220127_SR2DLT_Ab
AB01974173	01	Ainno_16251	Ainnocence	AIN1-26_AINNL0026	Lot# MB15NO4126	TC00820832	K020	3.486e-05	ng/ml	2275	-0.55							20220127_SR2DLT_Ab
AB01974173	01	Ainno_16251	Ainnocence	AIN1-26_AINNL0026	Lot# MB15NO4126	TC00820831	K020	3.486e-05	ng/ml	2300	0.17							20220127_SR2DLT_Ab
AB01974173	01	Ainno_16251	Ainnocence	AIN1-26_AINNL0026	Lot# MB15NO4126	TC00820832	K021	1.103e-05	ng/ml	2225	-0.62							20220127_SR2DLT_Ab
AB01974173	01	Ainno_16251	Ainnocence	AIN1-26_AINNL0026	Lot# MB15NO4126	TC00820831	K021	1.103e-05	ng/ml	3100	1.54							20220127_SR2DLT_Ab
AB01974173	01	Ainno_16251	Ainnocence	AIN1-26_AINNL0026	Lot# MB15NO4126	TC00820832	K022	3.491e-06	ng/ml	2525	-0.2							20220127_SR2DLT_Ab
AB01974173	01	Ainno_16251	Ainnocence	AIN1-26_AINNL0026	Lot# MB15NO4126	TC00820831	K022	3.491e-06	ng/ml	2675	0.81							20220127_SR2DLT_Ab
AB01974174	01	Ainno_16251	Ainnocence	AIN1-28_AINNL0028	Lot# MB15NO4128	TC00820832	L003	9670	ng/ml	2675	0.01	>9670	Inactive	-0.68	1.57	0	40	20220127_SR2DLT_Ab
AB01974174	01	Ainno_16251	Ainnocence	AIN1-28_AINNL0028	Lot# MB15NO4128	TC00820831	L003	9670	ng/ml	2250	0.09							20220127_SR2DLT_Ab
AB01974174	01	Ainno_16251	Ainnocence	AIN1-28_AINNL0028	Lot# MB15NO4128	TC00820832	L004	3060	ng/ml	2325	-0.48							20220127_SR2DLT_Ab
AB01974174	01	Ainno_16251	Ainnocence	AIN1-28_AINNL0028	Lot# MB15NO4128	TC00820831	L004	3060	ng/ml	2875	1.16							20220127_SR2DLT_Ab
AB01974174	01	Ainno_16251	Ainnocence	AIN1-28_AINNL0028	Lot# MB15NO4128	TC00820832	L005	968.4	ng/ml	3125	0.64							20220127_SR2DLT_Ab
AB01974174	01	Ainno_16251	Ainnocence	AIN1-28_AINNL0028	Lot# MB15NO4128	TC00820831	L005	968.4	ng/ml	3125	1.59							20220127_SR2DLT_Ab
AB01974174	01	Ainno_16251	Ainnocence	AIN1-28_AINNL0028	Lot# MB15NO4128	TC00820832	L006	306.5	ng/ml	3125	0.64							20220127_SR2DLT_Ab
AB01974174	01	Ainno_16251	Ainnocence	AIN1-28_AINNL0028	Lot# MB15NO4128	TC00820831	L006	306.5	ng/ml	2300	0.17							20220127_SR2DLT_Ab
AB01974174	01	Ainno_16251	Ainnocence	AIN1-28_AINNL0028	Lot# MB15NO4128	TC00820832	L007	96.98	ng/ml	2700	0.05							20220127_SR2DLT_Ab
AB01974174	01	Ainno_16251	Ainnocence	AIN1-28_AINNL0028	Lot# MB15NO4128	TC00820831	L007	96.98	ng/ml	2600	0.69							20220127_SR2DLT_Ab
AB01974174	01	Ainno_16251	Ainnocence	AIN1-28_AINNL0028	Lot# MB15NO4128	TC00820832	L008	30.69	ng/ml	2375	-0.41							20220127_SR2DLT_Ab
AB01974174	01	Ainno_16251	Ainnocence	AIN1-28_AINNL0028	Lot# MB15NO4128	TC00820831	L008	30.69	ng/ml	2725	0.9							20220127_SR2DLT_Ab
AB01974174	01	Ainno_16251	Ainnocence	AIN1-28_AINNL0028	Lot# MB15NO4128	TC00820832	L009	9.712	ng/ml	2475	-0.27							20220127_SR2DLT_Ab
AB01974174	01	Ainno_16251	Ainnocence	AIN1-28_AINNL0028	Lot# MB15NO4128	TC00820831	L009	9.712	ng/ml	3025	1.41							20220127_SR2DLT_Ab
AB01974174	01	Ainno_16251	Ainnocence	AIN1-28_AINNL0028	Lot# MB15NO4128	TC00820832	L010	3.073	ng/ml	2500	-0.23							20220127_SR2DLT_Ab
AB01974174	01	Ainno_16251	Ainnocence	AIN1-28_AINNL0028	Lot# MB15NO4128	TC00820831	L010	3.073	ng/ml	2350	0.26							20220127_SR2DLT_Ab
AB01974174	01	Ainno_16251	Ainnocence	AIN1-28_AINNL0028	Lot# MB15NO4128	TC00820832	L011	0.9726	ng/ml	2825	0.22							20220127_SR2DLT_Ab
AB01974174	01	Ainno_16251	Ainnocence	AIN1-28_AINNL0028	Lot# MB15NO4128	TC00820831	L011	0.9726	ng/ml	2050	-0.26							20220127_SR2DLT_Ab
AB01974174	01	Ainno_16251	Ainnocence	AIN1-28_AINNL0028	Lot# MB15NO4128	TC00820832	L012	0.3078	ng/ml	2350	-0.45							20220127_SR2DLT_Ab
AB01974174	01	Ainno_16251	Ainnocence	AIN1-28_AINNL0028	Lot# MB15NO4128	TC00820831	L012	0.3078	ng/ml	5400	5.49							20220127_SR2DLT_Ab
AB01974174	01	Ainno_16251	Ainnocence	AIN1-28_AINNL0028	Lot# MB15NO4128	TC00820832	L013	0.0974	ng/ml	2550	-0.16							20220127_SR2DLT_Ab
AB01974174	01	Ainno_16251	Ainnocence	AIN1-28_AINNL0028	Lot# MB15NO4128	TC00820831	L013	0.0974	ng/ml	3750	2.66							20220127_SR2DLT_Ab
AB01974174	01	Ainno_16251	Ainnocence	AIN1-28_AINNL0028	Lot# MB15NO4128	TC00820832	L014	0.03082	ng/ml	2800	0.19							20220127_SR2DLT_Ab
AB01974174	01	Ainno_16251	Ainnocence	AIN1-28_AINNL0028	Lot# MB15NO4128	TC00820831	L014	0.03082	ng/ml	4100	3.26							20220127_SR2DLT_Ab
AB01974174	01	Ainno_16251	Ainnocence	AIN1-28_AINNL0028	Lot# MB15NO4128	TC00820832	L015	0.009754	ng/ml	3225	0.78							20220127_SR2DLT_Ab
AB01974174	01	Ainno_16251	Ainnocence	AIN1-28_AINNL0028	Lot# MB15NO4128	TC00820831	L015	0.009754	ng/ml	3700	2.57							20220127_SR2DLT_Ab
AB01974174	01	Ainno_16251	Ainnocence	AIN1-28_AINNL0028	Lot# MB15NO4128	TC00820832	L016	0.003087	ng/ml	2600	-0.09							20220127_SR2DLT_Ab
AB01974174	01	Ainno_16251	Ainnocence	AIN1-28_AINNL0028	Lot# MB15NO4128	TC00820831	L016	0.003087	ng/ml	2600	0.69							20220127_SR2DLT_Ab
AB01974174	01	Ainno_16251	Ainnocence	AIN1-28_AINNL0028	Lot# MB15NO4128	TC00820832	L017	0.0009768	ng/ml	2775	0.15							20220127_SR2DLT_Ab
AB01974174	01	Ainno_16251	Ainnocence	AIN1-28_AINNL0028	Lot# MB15NO4128	TC00820831	L017	0.0009768	ng/ml	3225	1.76							20220127_SR2DLT_Ab
AB01974174	01	Ainno_16251	Ainnocence	AIN1-28_AINNL0028	Lot# MB15NO4128	TC00820832	L018	0.0003091	ng/ml	2550	-0.16							20220127_SR2DLT_Ab
AB01974174	01	Ainno_16251	Ainnocence	AIN1-28_AINNL0028	Lot# MB15NO4128	TC00820831	L018	0.0003091	ng/ml	3125	1.59							20220127_SR2DLT_Ab
AB01974174	01	Ainno_16251	Ainnocence	AIN1-28_AINNL0028	Lot# MB15NO4128	TC00820832	L019	9.782e-05	ng/ml	3550	1.24							20220127_SR2DLT_Ab
AB01974174	01	Ainno_16251	Ainnocence	AIN1-28_AINNL0028	Lot# MB15NO4128	TC00820831	L019	9.782e-05	ng/ml	4575	4.07							20220127_SR2DLT_Ab
AB01974174	01	Ainno_16251	Ainnocence	AIN1-28_AINNL0028	Lot# MB15NO4128	TC00820832	L020	3.096e-05	ng/ml	2525	-0.2							20220127_SR2DLT_Ab
AB01974174	01	Ainno_16251	Ainnocence	AIN1-28_AINNL0028	Lot# MB15NO4128	TC00820831	L020	3.096e-05	ng/ml	2325	0.21							20220127_SR2DLT_Ab
AB01974174	01	Ainno_16251	Ainnocence	AIN1-28_AINNL0028	Lot# MB15NO4128	TC00820832	L021	9.796e-06	ng/ml	3100	0.61							20220127_SR2DLT_Ab
AB01974174	01	Ainno_16251	Ainnocence	AIN1-28_AINNL0028	Lot# MB15NO4128	TC00820831	L021	9.796e-06	ng/ml	2975	1.33							20220127_SR2DLT_Ab
AB01974174	01	Ainno_16251	Ainnocence	AIN1-28_AINNL0028	Lot# MB15NO4128	TC00820832	L022	3.1e-06	ng/ml	3450	1.1							20220127_SR2DLT_Ab
AB01974174	01	Ainno_16251	Ainnocence	AIN1-28_AINNL0028	Lot# MB15NO4128	TC00820831	L022	3.1e-06	ng/ml	3000	1.37							20220127_SR2DLT_Ab
AB01974175	01	Ainno_16251	Ainnocence	AIN1-29_AINNL0029	Lot# MB15NO4129	TC00820832	M003	10000	ng/ml	2475	-0.27	>10000	Inactive	-1	1.25	0	39	20220127_SR2DLT_Ab
AB01974175	01	Ainno_16251	Ainnocence	AIN1-29_AINNL0029	Lot# MB15NO4129	TC00820831	M003	10000	ng/ml	2250	0.09							20220127_SR2DLT_Ab
AB01974175	01	Ainno_16251	Ainnocence	AIN1-29_AINNL0029	Lot# MB15NO4129	TC00820832	M004	3165	ng/ml	2675	0.01							20220127_SR2DLT_Ab
AB01974175	01	Ainno_16251	Ainnocence	AIN1-29_AINNL0029	Lot# MB15NO4129	TC00820831	M004	3165	ng/ml	2725	0.9							20220127_SR2DLT_Ab
AB01974175	01	Ainno_16251	Ainnocence	AIN1-29_AINNL0029	Lot# MB15NO4129	TC00820832	M005	1001	ng/ml	2800	0.19							20220127_SR2DLT_Ab
AB01974175	01	Ainno_16251	Ainnocence	AIN1-29_AINNL0029	Lot# MB15NO4129	TC00820831	M005	1001	ng/ml	2675	0.81							20220127_SR2DLT_Ab
AB01974175	01	Ainno_16251	Ainnocence	AIN1-29_AINNL0029	Lot# MB15NO4129	TC00820832	M006	316.9	ng/ml	3425	1.07							20220127_SR2DLT_Ab
AB01974175	01	Ainno_16251	Ainnocence	AIN1-29_AINNL0029	Lot# MB15NO4129	TC00820831	M006	316.9	ng/ml	3200	1.71							20220127_SR2DLT_Ab
AB01974175	01	Ainno_16251	Ainnocence	AIN1-29_AINNL0029	Lot# MB15NO4129	TC00820832	M007	100.3	ng/ml	2425	-0.34							20220127_SR2DLT_Ab
AB01974175	01	Ainno_16251	Ainnocence	AIN1-29_AINNL0029	Lot# MB15NO4129	TC00820831	M007	100.3	ng/ml	3025	1.41							20220127_SR2DLT_Ab
AB01974175	01	Ainno_16251	Ainnocence	AIN1-29_AINNL0029	Lot# MB15NO4129	TC00820832	M008	31.74	ng/ml	3750	1.52							20220127_SR2DLT_Ab
AB01974175	01	Ainno_16251	Ainnocence	AIN1-29_AINNL0029	Lot# MB15NO4129	TC00820831	M008	31.74	ng/ml	3100	1.54							20220127_SR2DLT_Ab
AB01974175	01	Ainno_16251	Ainnocence	AIN1-29_AINNL0029	Lot# MB15NO4129	TC00820832	M009	10.04	ng/ml	2775	0.15							20220127_SR2DLT_Ab
AB01974175	01	Ainno_16251	Ainnocence	AIN1-29_AINNL0029	Lot# MB15NO4129	TC00820831	M009	10.04	ng/ml	4050	3.17							20220127_SR2DLT_Ab
AB01974175	01	Ainno_16251	Ainnocence	AIN1-29_AINNL0029	Lot# MB15NO4129	TC00820832	M010	3.178	ng/ml	2675	0.01							20220127_SR2DLT_Ab
AB01974175	01	Ainno_16251	Ainnocence	AIN1-29_AINNL0029	Lot# MB15NO4129	TC00820831	M010	3.178	ng/ml	2625	0.73							20220127_SR2DLT_Ab
AB01974175	01	Ainno_16251	Ainnocence	AIN1-29_AINNL0029	Lot# MB15NO4129	TC00820832	M011	1.006	ng/ml	2675	0.01							20220127_SR2DLT_Ab
AB01974175	01	Ainno_16251	Ainnocence	AIN1-29_AINNL0029	Lot# MB15NO4129	TC00820831	M011	1.006	ng/ml	2550	0.6							20220127_SR2DLT_Ab
AB01974175	01	Ainno_16251	Ainnocence	AIN1-29_AINNL0029	Lot# MB15NO4129	TC00820832	M012	0.3183	ng/ml	3500	1.17							20220127_SR2DLT_Ab
AB01974175	01	Ainno_16251	Ainnocence	AIN1-29_AINNL0029	Lot# MB15NO4129	TC00820831	M012	0.3183	ng/ml	3850	2.83							20220127_SR2DLT_Ab
AB01974175	01	Ainno_16251	Ainnocence	AIN1-29_AINNL0029	Lot# MB15NO4129	TC00820832	M013	0.1007	ng/ml	2975	0.43							20220127_SR2DLT_Ab
AB01974175	01	Ainno_16251	Ainnocence	AIN1-29_AINNL0029	Lot# MB15NO4129	TC00820831	M013	0.1007	ng/ml	2350	0.26							20220127_SR2DLT_Ab
AB01974175	01	Ainno_16251	Ainnocence	AIN1-29_AINNL0029	Lot# MB15NO4129	TC00820832	M014	0.03187	ng/ml	3400	1.03							20220127_SR2DLT_Ab
AB01974175	01	Ainno_16251	Ainnocence	AIN1-29_AINNL0029	Lot# MB15NO4129	TC00820832	M015	0.01009	ng/ml	2800	0.19							20220127_SR2DLT_Ab
AB01974175	01	Ainno_16251	Ainnocence	AIN1-29_AINNL0029	Lot# MB15NO4129	TC00820831	M015	0.01009	ng/ml	3750	2.66							20220127_SR2DLT_Ab
AB01974175	01	Ainno_16251	Ainnocence	AIN1-29_AINNL0029	Lot# MB15NO4129	TC00820832	M016	0.003192	ng/ml	2750	0.12							20220127_SR2DLT_Ab
AB01974175	01	Ainno_16251	Ainnocence	AIN1-29_AINNL0029	Lot# MB15NO4129	TC00820831	M016	0.003192	ng/ml	2700	0.86							20220127_SR2DLT_Ab
AB01974175	01	Ainno_16251	Ainnocence	AIN1-29_AINNL0029	Lot# MB15NO4129	TC00820832	M017	0.00101	ng/ml	4250	2.22							20220127_SR2DLT_Ab
AB01974175	01	Ainno_16251	Ainnocence	AIN1-29_AINNL0029	Lot# MB15NO4129	TC00820831	M017	0.00101	ng/ml	2975	1.33							20220127_SR2DLT_Ab
AB01974175	01	Ainno_16251	Ainnocence	AIN1-29_AINNL0029	Lot# MB15NO4129	TC00820832	M018	0.0003197	ng/ml	2950	0.4							20220127_SR2DLT_Ab
AB01974175	01	Ainno_16251	Ainnocence	AIN1-29_AINNL0029	Lot# MB15NO4129	TC00820831	M018	0.0003197	ng/ml	3350	1.97							20220127_SR2DLT_Ab
AB01974175	01	Ainno_16251	Ainnocence	AIN1-29_AINNL0029	Lot# MB15NO4129	TC00820832	M019	0.0001012	ng/ml	3150	0.68							20220127_SR2DLT_Ab
AB01974175	01	Ainno_16251	Ainnocence	AIN1-29_AINNL0029	Lot# MB15NO4129	TC00820831	M019	0.0001012	ng/ml	3100	1.54							20220127_SR2DLT_Ab
AB01974175	01	Ainno_16251	Ainnocence	AIN1-29_AINNL0029	Lot# MB15NO4129	TC00820832	M020	3.201e-05	ng/ml	2675	0.01							20220127_SR2DLT_Ab
AB01974175	01	Ainno_16251	Ainnocence	AIN1-29_AINNL0029	Lot# MB15NO4129	TC00820831	M020	3.201e-05	ng/ml	2350	0.26							20220127_SR2DLT_Ab
AB01974175	01	Ainno_16251	Ainnocence	AIN1-29_AINNL0029	Lot# MB15NO4129	TC00820832	M021	1.013e-05	ng/ml	3475	1.14							20220127_SR2DLT_Ab
AB01974175	01	Ainno_16251	Ainnocence	AIN1-29_AINNL0029	Lot# MB15NO4129	TC00820831	M021	1.013e-05	ng/ml	2750	0.94							20220127_SR2DLT_Ab
AB01974175	01	Ainno_16251	Ainnocence	AIN1-29_AINNL0029	Lot# MB15NO4129	TC00820832	M022	3.206e-06	ng/ml	2575	-0.13							20220127_SR2DLT_Ab
AB01974175	01	Ainno_16251	Ainnocence	AIN1-29_AINNL0029	Lot# MB15NO4129	TC00820831	M022	3.206e-06	ng/ml	2450	0.43							20220127_SR2DLT_Ab
AB01974176	01	Ainno_16251	Ainnocence	AIN1-30_AINNL0030	Lot# MB15NO4130	TC00820832	N003	8670	ng/ml	1975	-0.97	>8670	Inactive	-0.11	1.05	0	40	20220127_SR2DLT_Ab
AB01974176	01	Ainno_16251	Ainnocence	AIN1-30_AINNL0030	Lot# MB15NO4130	TC00820831	N003	8670	ng/ml	2525	0.56							20220127_SR2DLT_Ab
AB01974176	01	Ainno_16251	Ainnocence	AIN1-30_AINNL0030	Lot# MB15NO4130	TC00820832	N004	2744	ng/ml	2675	0.01							20220127_SR2DLT_Ab
AB01974176	01	Ainno_16251	Ainnocence	AIN1-30_AINNL0030	Lot# MB15NO4130	TC00820831	N004	2744	ng/ml	3625	2.44							20220127_SR2DLT_Ab
AB01974176	01	Ainno_16251	Ainnocence	AIN1-30_AINNL0030	Lot# MB15NO4130	TC00820832	N005	868.3	ng/ml	2325	-0.48							20220127_SR2DLT_Ab
AB01974176	01	Ainno_16251	Ainnocence	AIN1-30_AINNL0030	Lot# MB15NO4130	TC00820831	N005	868.3	ng/ml	2425	0.39							20220127_SR2DLT_Ab
AB01974176	01	Ainno_16251	Ainnocence	AIN1-30_AINNL0030	Lot# MB15NO4130	TC00820832	N006	274.8	ng/ml	2975	0.43							20220127_SR2DLT_Ab
AB01974176	01	Ainno_16251	Ainnocence	AIN1-30_AINNL0030	Lot# MB15NO4130	TC00820831	N006	274.8	ng/ml	3075	1.5							20220127_SR2DLT_Ab
AB01974176	01	Ainno_16251	Ainnocence	AIN1-30_AINNL0030	Lot# MB15NO4130	TC00820832	N007	86.95	ng/ml	2800	0.19							20220127_SR2DLT_Ab
AB01974176	01	Ainno_16251	Ainnocence	AIN1-30_AINNL0030	Lot# MB15NO4130	TC00820831	N007	86.95	ng/ml	3075	1.5							20220127_SR2DLT_Ab
AB01974176	01	Ainno_16251	Ainnocence	AIN1-30_AINNL0030	Lot# MB15NO4130	TC00820832	N008	27.52	ng/ml	3125	0.64							20220127_SR2DLT_Ab
AB01974176	01	Ainno_16251	Ainnocence	AIN1-30_AINNL0030	Lot# MB15NO4130	TC00820831	N008	27.52	ng/ml	2600	0.69							20220127_SR2DLT_Ab
AB01974176	01	Ainno_16251	Ainnocence	AIN1-30_AINNL0030	Lot# MB15NO4130	TC00820832	N009	8.708	ng/ml	3775	1.56							20220127_SR2DLT_Ab
AB01974176	01	Ainno_16251	Ainnocence	AIN1-30_AINNL0030	Lot# MB15NO4130	TC00820831	N009	8.708	ng/ml	3200	1.71							20220127_SR2DLT_Ab
AB01974176	01	Ainno_16251	Ainnocence	AIN1-30_AINNL0030	Lot# MB15NO4130	TC00820832	N010	2.756	ng/ml	3525	1.21							20220127_SR2DLT_Ab
AB01974176	01	Ainno_16251	Ainnocence	AIN1-30_AINNL0030	Lot# MB15NO4130	TC00820831	N010	2.756	ng/ml	2675	0.81							20220127_SR2DLT_Ab
AB01974176	01	Ainno_16251	Ainnocence	AIN1-30_AINNL0030	Lot# MB15NO4130	TC00820832	N011	0.872	ng/ml	3500	1.17							20220127_SR2DLT_Ab
AB01974176	01	Ainno_16251	Ainnocence	AIN1-30_AINNL0030	Lot# MB15NO4130	TC00820831	N011	0.872	ng/ml	2775	0.99							20220127_SR2DLT_Ab
AB01974176	01	Ainno_16251	Ainnocence	AIN1-30_AINNL0030	Lot# MB15NO4130	TC00820832	N012	0.276	ng/ml	3750	1.52							20220127_SR2DLT_Ab
AB01974176	01	Ainno_16251	Ainnocence	AIN1-30_AINNL0030	Lot# MB15NO4130	TC00820831	N012	0.276	ng/ml	3650	2.49							20220127_SR2DLT_Ab
AB01974176	01	Ainno_16251	Ainnocence	AIN1-30_AINNL0030	Lot# MB15NO4130	TC00820832	N013	0.08733	ng/ml	2975	0.43							20220127_SR2DLT_Ab
AB01974176	01	Ainno_16251	Ainnocence	AIN1-30_AINNL0030	Lot# MB15NO4130	TC00820831	N013	0.08733	ng/ml	3525	2.27							20220127_SR2DLT_Ab
AB01974176	01	Ainno_16251	Ainnocence	AIN1-30_AINNL0030	Lot# MB15NO4130	TC00820832	N014	0.02764	ng/ml	3700	1.45							20220127_SR2DLT_Ab
AB01974176	01	Ainno_16251	Ainnocence	AIN1-30_AINNL0030	Lot# MB15NO4130	TC00820831	N014	0.02764	ng/ml	2975	1.33							20220127_SR2DLT_Ab
AB01974176	01	Ainno_16251	Ainnocence	AIN1-30_AINNL0030	Lot# MB15NO4130	TC00820832	N015	0.008745	ng/ml	3075	0.57							20220127_SR2DLT_Ab
AB01974176	01	Ainno_16251	Ainnocence	AIN1-30_AINNL0030	Lot# MB15NO4130	TC00820831	N015	0.008745	ng/ml	2375	0.3							20220127_SR2DLT_Ab
AB01974176	01	Ainno_16251	Ainnocence	AIN1-30_AINNL0030	Lot# MB15NO4130	TC00820832	N016	0.002767	ng/ml	4075	1.98							20220127_SR2DLT_Ab
AB01974176	01	Ainno_16251	Ainnocence	AIN1-30_AINNL0030	Lot# MB15NO4130	TC00820831	N016	0.002767	ng/ml	2500	0.51							20220127_SR2DLT_Ab
AB01974176	01	Ainno_16251	Ainnocence	AIN1-30_AINNL0030	Lot# MB15NO4130	TC00820832	N017	0.0008758	ng/ml	2600	-0.09							20220127_SR2DLT_Ab
AB01974176	01	Ainno_16251	Ainnocence	AIN1-30_AINNL0030	Lot# MB15NO4130	TC00820831	N017	0.0008758	ng/ml	3400	2.06							20220127_SR2DLT_Ab
AB01974176	01	Ainno_16251	Ainnocence	AIN1-30_AINNL0030	Lot# MB15NO4130	TC00820832	N018	0.0002771	ng/ml	2425	-0.34							20220127_SR2DLT_Ab
AB01974176	01	Ainno_16251	Ainnocence	AIN1-30_AINNL0030	Lot# MB15NO4130	TC00820831	N018	0.0002771	ng/ml	2650	0.77							20220127_SR2DLT_Ab
AB01974176	01	Ainno_16251	Ainnocence	AIN1-30_AINNL0030	Lot# MB15NO4130	TC00820832	N019	8.771e-05	ng/ml	2550	-0.16							20220127_SR2DLT_Ab
AB01974176	01	Ainno_16251	Ainnocence	AIN1-30_AINNL0030	Lot# MB15NO4130	TC00820831	N019	8.771e-05	ng/ml	3050	1.46							20220127_SR2DLT_Ab
AB01974176	01	Ainno_16251	Ainnocence	AIN1-30_AINNL0030	Lot# MB15NO4130	TC00820832	N020	2.775e-05	ng/ml	2625	-0.06							20220127_SR2DLT_Ab
AB01974176	01	Ainno_16251	Ainnocence	AIN1-30_AINNL0030	Lot# MB15NO4130	TC00820831	N020	2.775e-05	ng/ml	2700	0.86							20220127_SR2DLT_Ab
AB01974176	01	Ainno_16251	Ainnocence	AIN1-30_AINNL0030	Lot# MB15NO4130	TC00820832	N021	8.783e-06	ng/ml	2150	-0.73							20220127_SR2DLT_Ab
AB01974176	01	Ainno_16251	Ainnocence	AIN1-30_AINNL0030	Lot# MB15NO4130	TC00820831	N021	8.783e-06	ng/ml	2875	1.16							20220127_SR2DLT_Ab
AB01974176	01	Ainno_16251	Ainnocence	AIN1-30_AINNL0030	Lot# MB15NO4130	TC00820832	N022	2.779e-06	ng/ml	2475	-0.27							20220127_SR2DLT_Ab
AB01974176	01	Ainno_16251	Ainnocence	AIN1-30_AINNL0030	Lot# MB15NO4130	TC00820831	N022	2.779e-06	ng/ml	2575	0.64							20220127_SR2DLT_Ab
AB01974177	01	Ainno_16251	Ainnocence	AIN1-31_AINNL0031	Lot# MB15NO4131	TC00820832	O003	9780	ng/ml	75800	102.8	2.704	Active	1.94	7.39	0.26	40	20220127_SR2DLT_Ab
AB01974177	01	Ainno_16251	Ainnocence	AIN1-31_AINNL0031	Lot# MB15NO4131	TC00820831	O003	9780	ng/ml	63025	104.26							20220127_SR2DLT_Ab
AB01974177	01	Ainno_16251	Ainnocence	AIN1-31_AINNL0031	Lot# MB15NO4131	TC00820832	O004	3095	ng/ml	74450	100.9							20220127_SR2DLT_Ab
AB01974177	01	Ainno_16251	Ainnocence	AIN1-31_AINNL0031	Lot# MB15NO4131	TC00820831	O004	3095	ng/ml	66675	110.52							20220127_SR2DLT_Ab
AB01974177	01	Ainno_16251	Ainnocence	AIN1-31_AINNL0031	Lot# MB15NO4131	TC00820832	O005	979.4	ng/ml	78600	106.73							20220127_SR2DLT_Ab
AB01974177	01	Ainno_16251	Ainnocence	AIN1-31_AINNL0031	Lot# MB15NO4131	TC00820831	O005	979.4	ng/ml	69400	115.19							20220127_SR2DLT_Ab
AB01974177	01	Ainno_16251	Ainnocence	AIN1-31_AINNL0031	Lot# MB15NO4131	TC00820832	O006	309.9	ng/ml	77900	105.75							20220127_SR2DLT_Ab
AB01974177	01	Ainno_16251	Ainnocence	AIN1-31_AINNL0031	Lot# MB15NO4131	TC00820831	O006	309.9	ng/ml	65425	108.38							20220127_SR2DLT_Ab
AB01974177	01	Ainno_16251	Ainnocence	AIN1-31_AINNL0031	Lot# MB15NO4131	TC00820832	O007	98.08	ng/ml	74375	100.79							20220127_SR2DLT_Ab
AB01974177	01	Ainno_16251	Ainnocence	AIN1-31_AINNL0031	Lot# MB15NO4131	TC00820831	O007	98.08	ng/ml	70150	116.48							20220127_SR2DLT_Ab
AB01974177	01	Ainno_16251	Ainnocence	AIN1-31_AINNL0031	Lot# MB15NO4131	TC00820832	O008	31.04	ng/ml	83275	113.3							20220127_SR2DLT_Ab
AB01974177	01	Ainno_16251	Ainnocence	AIN1-31_AINNL0031	Lot# MB15NO4131	TC00820831	O008	31.04	ng/ml	66300	109.88							20220127_SR2DLT_Ab
AB01974177	01	Ainno_16251	Ainnocence	AIN1-31_AINNL0031	Lot# MB15NO4131	TC00820832	O009	9.822	ng/ml	80325	109.16							20220127_SR2DLT_Ab
AB01974177	01	Ainno_16251	Ainnocence	AIN1-31_AINNL0031	Lot# MB15NO4131	TC00820831	O009	9.822	ng/ml	43250	70.37							20220127_SR2DLT_Ab
AB01974177	01	Ainno_16251	Ainnocence	AIN1-31_AINNL0031	Lot# MB15NO4131	TC00820832	O010	3.108	ng/ml	38100	49.8							20220127_SR2DLT_Ab
AB01974177	01	Ainno_16251	Ainnocence	AIN1-31_AINNL0031	Lot# MB15NO4131	TC00820831	O010	3.108	ng/ml	39675	64.24							20220127_SR2DLT_Ab
AB01974177	01	Ainno_16251	Ainnocence	AIN1-31_AINNL0031	Lot# MB15NO4131	TC00820832	O011	0.9837	ng/ml	12700	14.1							20220127_SR2DLT_Ab
AB01974177	01	Ainno_16251	Ainnocence	AIN1-31_AINNL0031	Lot# MB15NO4131	TC00820831	O011	0.9837	ng/ml	7600	9.26							20220127_SR2DLT_Ab
AB01974177	01	Ainno_16251	Ainnocence	AIN1-31_AINNL0031	Lot# MB15NO4131	TC00820832	O012	0.3113	ng/ml	4575	2.68							20220127_SR2DLT_Ab
AB01974177	01	Ainno_16251	Ainnocence	AIN1-31_AINNL0031	Lot# MB15NO4131	TC00820831	O012	0.3113	ng/ml	7075	8.36							20220127_SR2DLT_Ab
AB01974177	01	Ainno_16251	Ainnocence	AIN1-31_AINNL0031	Lot# MB15NO4131	TC00820832	O013	0.09851	ng/ml	4800	3							20220127_SR2DLT_Ab
AB01974177	01	Ainno_16251	Ainnocence	AIN1-31_AINNL0031	Lot# MB15NO4131	TC00820831	O013	0.09851	ng/ml	4025	3.13							20220127_SR2DLT_Ab
AB01974177	01	Ainno_16251	Ainnocence	AIN1-31_AINNL0031	Lot# MB15NO4131	TC00820832	O014	0.03117	ng/ml	2950	0.4							20220127_SR2DLT_Ab
AB01974177	01	Ainno_16251	Ainnocence	AIN1-31_AINNL0031	Lot# MB15NO4131	TC00820831	O014	0.03117	ng/ml	3700	2.57							20220127_SR2DLT_Ab
AB01974177	01	Ainno_16251	Ainnocence	AIN1-31_AINNL0031	Lot# MB15NO4131	TC00820832	O015	0.009865	ng/ml	2750	0.12							20220127_SR2DLT_Ab
AB01974177	01	Ainno_16251	Ainnocence	AIN1-31_AINNL0031	Lot# MB15NO4131	TC00820831	O015	0.009865	ng/ml	2575	0.64							20220127_SR2DLT_Ab
AB01974177	01	Ainno_16251	Ainnocence	AIN1-31_AINNL0031	Lot# MB15NO4131	TC00820832	O016	0.003122	ng/ml	3325	0.92							20220127_SR2DLT_Ab
AB01974177	01	Ainno_16251	Ainnocence	AIN1-31_AINNL0031	Lot# MB15NO4131	TC00820831	O016	0.003122	ng/ml	2400	0.34							20220127_SR2DLT_Ab
AB01974177	01	Ainno_16251	Ainnocence	AIN1-31_AINNL0031	Lot# MB15NO4131	TC00820832	O017	0.0009879	ng/ml	3025	0.5							20220127_SR2DLT_Ab
AB01974177	01	Ainno_16251	Ainnocence	AIN1-31_AINNL0031	Lot# MB15NO4131	TC00820831	O017	0.0009879	ng/ml	2950	1.29							20220127_SR2DLT_Ab
AB01974177	01	Ainno_16251	Ainnocence	AIN1-31_AINNL0031	Lot# MB15NO4131	TC00820832	O018	0.0003126	ng/ml	2750	0.12							20220127_SR2DLT_Ab
AB01974177	01	Ainno_16251	Ainnocence	AIN1-31_AINNL0031	Lot# MB15NO4131	TC00820831	O018	0.0003126	ng/ml	2150	-0.09							20220127_SR2DLT_Ab
AB01974177	01	Ainno_16251	Ainnocence	AIN1-31_AINNL0031	Lot# MB15NO4131	TC00820832	O019	9.893e-05	ng/ml	2175	-0.69							20220127_SR2DLT_Ab
AB01974177	01	Ainno_16251	Ainnocence	AIN1-31_AINNL0031	Lot# MB15NO4131	TC00820831	O019	9.893e-05	ng/ml	1800	-0.69							20220127_SR2DLT_Ab
AB01974177	01	Ainno_16251	Ainnocence	AIN1-31_AINNL0031	Lot# MB15NO4131	TC00820832	O020	3.131e-05	ng/ml	3825	1.63							20220127_SR2DLT_Ab
AB01974177	01	Ainno_16251	Ainnocence	AIN1-31_AINNL0031	Lot# MB15NO4131	TC00820831	O020	3.131e-05	ng/ml	2675	0.81							20220127_SR2DLT_Ab
AB01974177	01	Ainno_16251	Ainnocence	AIN1-31_AINNL0031	Lot# MB15NO4131	TC00820832	O021	9.908e-06	ng/ml	2525	-0.2							20220127_SR2DLT_Ab
AB01974177	01	Ainno_16251	Ainnocence	AIN1-31_AINNL0031	Lot# MB15NO4131	TC00820831	O021	9.908e-06	ng/ml	3150	1.63							20220127_SR2DLT_Ab
AB01974177	01	Ainno_16251	Ainnocence	AIN1-31_AINNL0031	Lot# MB15NO4131	TC00820832	O022	3.135e-06	ng/ml	3250	0.82							20220127_SR2DLT_Ab
AB01974177	01	Ainno_16251	Ainnocence	AIN1-31_AINNL0031	Lot# MB15NO4131	TC00820831	O022	3.135e-06	ng/ml	1900	-0.51							20220127_SR2DLT_Ab
AB01974178	01	Ainno_16251	Ainnocence	AIN1-32_AINNL0032	Lot# MB15NO4132	TC00820832	P003	10220	ng/ml	3925	1.77	>10220	Inactive	1	0.92	>9999	40	20220127_SR2DLT_Ab
AB01974178	01	Ainno_16251	Ainnocence	AIN1-32_AINNL0032	Lot# MB15NO4132	TC00820831	P003	10220	ng/ml	2050	-0.26							20220127_SR2DLT_Ab
AB01974178	01	Ainno_16251	Ainnocence	AIN1-32_AINNL0032	Lot# MB15NO4132	TC00820832	P004	3234	ng/ml	2475	-0.27							20220127_SR2DLT_Ab
AB01974178	01	Ainno_16251	Ainnocence	AIN1-32_AINNL0032	Lot# MB15NO4132	TC00820831	P004	3234	ng/ml	3675	2.53							20220127_SR2DLT_Ab
AB01974178	01	Ainno_16251	Ainnocence	AIN1-32_AINNL0032	Lot# MB15NO4132	TC00820832	P005	1023	ng/ml	2275	-0.55							20220127_SR2DLT_Ab
AB01974178	01	Ainno_16251	Ainnocence	AIN1-32_AINNL0032	Lot# MB15NO4132	TC00820831	P005	1023	ng/ml	2400	0.34							20220127_SR2DLT_Ab
AB01974178	01	Ainno_16251	Ainnocence	AIN1-32_AINNL0032	Lot# MB15NO4132	TC00820832	P006	323.9	ng/ml	2000	-0.94							20220127_SR2DLT_Ab
AB01974178	01	Ainno_16251	Ainnocence	AIN1-32_AINNL0032	Lot# MB15NO4132	TC00820831	P006	323.9	ng/ml	2200	0							20220127_SR2DLT_Ab
AB01974178	01	Ainno_16251	Ainnocence	AIN1-32_AINNL0032	Lot# MB15NO4132	TC00820832	P007	102.5	ng/ml	4600	2.72							20220127_SR2DLT_Ab
AB01974178	01	Ainno_16251	Ainnocence	AIN1-32_AINNL0032	Lot# MB15NO4132	TC00820831	P007	102.5	ng/ml	2525	0.56							20220127_SR2DLT_Ab
AB01974178	01	Ainno_16251	Ainnocence	AIN1-32_AINNL0032	Lot# MB15NO4132	TC00820832	P008	32.44	ng/ml	2650	-0.02							20220127_SR2DLT_Ab
AB01974178	01	Ainno_16251	Ainnocence	AIN1-32_AINNL0032	Lot# MB15NO4132	TC00820831	P008	32.44	ng/ml	2450	0.43							20220127_SR2DLT_Ab
AB01974178	01	Ainno_16251	Ainnocence	AIN1-32_AINNL0032	Lot# MB15NO4132	TC00820832	P009	10.26	ng/ml	2850	0.26							20220127_SR2DLT_Ab
AB01974178	01	Ainno_16251	Ainnocence	AIN1-32_AINNL0032	Lot# MB15NO4132	TC00820831	P009	10.26	ng/ml	2275	0.13							20220127_SR2DLT_Ab
AB01974178	01	Ainno_16251	Ainnocence	AIN1-32_AINNL0032	Lot# MB15NO4132	TC00820832	P010	3.248	ng/ml	2625	-0.06							20220127_SR2DLT_Ab
AB01974178	01	Ainno_16251	Ainnocence	AIN1-32_AINNL0032	Lot# MB15NO4132	TC00820831	P010	3.248	ng/ml	2800	1.03							20220127_SR2DLT_Ab
AB01974178	01	Ainno_16251	Ainnocence	AIN1-32_AINNL0032	Lot# MB15NO4132	TC00820832	P011	1.028	ng/ml	3100	0.61							20220127_SR2DLT_Ab
AB01974178	01	Ainno_16251	Ainnocence	AIN1-32_AINNL0032	Lot# MB15NO4132	TC00820831	P011	1.028	ng/ml	1725	-0.81							20220127_SR2DLT_Ab
AB01974178	01	Ainno_16251	Ainnocence	AIN1-32_AINNL0032	Lot# MB15NO4132	TC00820832	P012	0.3253	ng/ml	3025	0.5							20220127_SR2DLT_Ab
AB01974178	01	Ainno_16251	Ainnocence	AIN1-32_AINNL0032	Lot# MB15NO4132	TC00820831	P012	0.3253	ng/ml	2725	0.9							20220127_SR2DLT_Ab
AB01974178	01	Ainno_16251	Ainnocence	AIN1-32_AINNL0032	Lot# MB15NO4132	TC00820832	P013	0.1029	ng/ml	3450	1.1							20220127_SR2DLT_Ab
AB01974178	01	Ainno_16251	Ainnocence	AIN1-32_AINNL0032	Lot# MB15NO4132	TC00820831	P013	0.1029	ng/ml	3075	1.5							20220127_SR2DLT_Ab
AB01974178	01	Ainno_16251	Ainnocence	AIN1-32_AINNL0032	Lot# MB15NO4132	TC00820832	P014	0.03258	ng/ml	3175	0.71							20220127_SR2DLT_Ab
AB01974178	01	Ainno_16251	Ainnocence	AIN1-32_AINNL0032	Lot# MB15NO4132	TC00820831	P014	0.03258	ng/ml	2400	0.34							20220127_SR2DLT_Ab
AB01974178	01	Ainno_16251	Ainnocence	AIN1-32_AINNL0032	Lot# MB15NO4132	TC00820832	P015	0.01031	ng/ml	3575	1.28							20220127_SR2DLT_Ab
AB01974178	01	Ainno_16251	Ainnocence	AIN1-32_AINNL0032	Lot# MB15NO4132	TC00820831	P015	0.01031	ng/ml	2550	0.6							20220127_SR2DLT_Ab
AB01974178	01	Ainno_16251	Ainnocence	AIN1-32_AINNL0032	Lot# MB15NO4132	TC00820832	P016	0.003262	ng/ml	3175	0.71							20220127_SR2DLT_Ab
AB01974178	01	Ainno_16251	Ainnocence	AIN1-32_AINNL0032	Lot# MB15NO4132	TC00820831	P016	0.003262	ng/ml	2125	-0.13							20220127_SR2DLT_Ab
AB01974178	01	Ainno_16251	Ainnocence	AIN1-32_AINNL0032	Lot# MB15NO4132	TC00820832	P017	0.001032	ng/ml	3175	0.71							20220127_SR2DLT_Ab
AB01974178	01	Ainno_16251	Ainnocence	AIN1-32_AINNL0032	Lot# MB15NO4132	TC00820831	P017	0.001032	ng/ml	2550	0.6							20220127_SR2DLT_Ab
AB01974178	01	Ainno_16251	Ainnocence	AIN1-32_AINNL0032	Lot# MB15NO4132	TC00820832	P018	0.0003267	ng/ml	2525	-0.2							20220127_SR2DLT_Ab
AB01974178	01	Ainno_16251	Ainnocence	AIN1-32_AINNL0032	Lot# MB15NO4132	TC00820831	P018	0.0003267	ng/ml	2450	0.43							20220127_SR2DLT_Ab
AB01974178	01	Ainno_16251	Ainnocence	AIN1-32_AINNL0032	Lot# MB15NO4132	TC00820832	P019	0.0001034	ng/ml	2850	0.26							20220127_SR2DLT_Ab
AB01974178	01	Ainno_16251	Ainnocence	AIN1-32_AINNL0032	Lot# MB15NO4132	TC00820831	P019	0.0001034	ng/ml	2400	0.34							20220127_SR2DLT_Ab
AB01974178	01	Ainno_16251	Ainnocence	AIN1-32_AINNL0032	Lot# MB15NO4132	TC00820832	P020	3.272e-05	ng/ml	2900	0.33							20220127_SR2DLT_Ab
AB01974178	01	Ainno_16251	Ainnocence	AIN1-32_AINNL0032	Lot# MB15NO4132	TC00820831	P020	3.272e-05	ng/ml	2100	-0.17							20220127_SR2DLT_Ab
AB01974178	01	Ainno_16251	Ainnocence	AIN1-32_AINNL0032	Lot# MB15NO4132	TC00820832	P021	1.035e-05	ng/ml	2925	0.36							20220127_SR2DLT_Ab
AB01974178	01	Ainno_16251	Ainnocence	AIN1-32_AINNL0032	Lot# MB15NO4132	TC00820831	P021	1.035e-05	ng/ml	2825	1.07							20220127_SR2DLT_Ab
AB01974178	01	Ainno_16251	Ainnocence	AIN1-32_AINNL0032	Lot# MB15NO4132	TC00820832	P022	3.276e-06	ng/ml	3075	0.57							20220127_SR2DLT_Ab
AB01974178	01	Ainno_16251	Ainnocence	AIN1-32_AINNL0032	Lot# MB15NO4132	TC00820831	P022	3.276e-06	ng/ml	2400	0.34							20220127_SR2DLT_Ab
AB01974179	01	Ainno_16251	Ainnocence	AIN1-33_AINNL0033	Lot# MB15NO4133	TC00820835	A003	10670	ng/ml	2300	-0.51	>10670	Inactive	-1	0.63	0	40	20220127_SR2DLT_Ab
AB01974179	01	Ainno_16251	Ainnocence	AIN1-33_AINNL0033	Lot# MB15NO4133	TC00820834	A003	10670	ng/ml	2375	-0.27							20220127_SR2DLT_Ab
AB01974179	01	Ainno_16251	Ainnocence	AIN1-33_AINNL0033	Lot# MB15NO4133	TC00820835	A004	3377	ng/ml	2200	-0.65							20220127_SR2DLT_Ab
AB01974179	01	Ainno_16251	Ainnocence	AIN1-33_AINNL0033	Lot# MB15NO4133	TC00820834	A004	3377	ng/ml	2225	-0.48							20220127_SR2DLT_Ab
AB01974179	01	Ainno_16251	Ainnocence	AIN1-33_AINNL0033	Lot# MB15NO4133	TC00820835	A005	1069	ng/ml	2300	-0.51							20220127_SR2DLT_Ab
AB01974179	01	Ainno_16251	Ainnocence	AIN1-33_AINNL0033	Lot# MB15NO4133	TC00820834	A005	1069	ng/ml	1875	-0.96							20220127_SR2DLT_Ab
AB01974179	01	Ainno_16251	Ainnocence	AIN1-33_AINNL0033	Lot# MB15NO4133	TC00820835	A006	338.1	ng/ml	2800	0.18							20220127_SR2DLT_Ab
AB01974179	01	Ainno_16251	Ainnocence	AIN1-33_AINNL0033	Lot# MB15NO4133	TC00820834	A006	338.1	ng/ml	2225	-0.48							20220127_SR2DLT_Ab
AB01974179	01	Ainno_16251	Ainnocence	AIN1-33_AINNL0033	Lot# MB15NO4133	TC00820835	A007	107	ng/ml	2125	-0.75							20220127_SR2DLT_Ab
AB01974179	01	Ainno_16251	Ainnocence	AIN1-33_AINNL0033	Lot# MB15NO4133	TC00820834	A007	107	ng/ml	1825	-1.03							20220127_SR2DLT_Ab
AB01974179	01	Ainno_16251	Ainnocence	AIN1-33_AINNL0033	Lot# MB15NO4133	TC00820835	A008	33.86	ng/ml	3650	1.35							20220127_SR2DLT_Ab
AB01974179	01	Ainno_16251	Ainnocence	AIN1-33_AINNL0033	Lot# MB15NO4133	TC00820834	A008	33.86	ng/ml	2425	-0.2							20220127_SR2DLT_Ab
AB01974179	01	Ainno_16251	Ainnocence	AIN1-33_AINNL0033	Lot# MB15NO4133	TC00820835	A009	10.72	ng/ml	2750	0.11							20220127_SR2DLT_Ab
AB01974179	01	Ainno_16251	Ainnocence	AIN1-33_AINNL0033	Lot# MB15NO4133	TC00820834	A009	10.72	ng/ml	2850	0.38							20220127_SR2DLT_Ab
AB01974179	01	Ainno_16251	Ainnocence	AIN1-33_AINNL0033	Lot# MB15NO4133	TC00820835	A010	3.391	ng/ml	2525	-0.2							20220127_SR2DLT_Ab
AB01974179	01	Ainno_16251	Ainnocence	AIN1-33_AINNL0033	Lot# MB15NO4133	TC00820834	A010	3.391	ng/ml	2000	-0.79							20220127_SR2DLT_Ab
AB01974179	01	Ainno_16251	Ainnocence	AIN1-33_AINNL0033	Lot# MB15NO4133	TC00820835	A011	1.073	ng/ml	2125	-0.75							20220127_SR2DLT_Ab
AB01974179	01	Ainno_16251	Ainnocence	AIN1-33_AINNL0033	Lot# MB15NO4133	TC00820834	A011	1.073	ng/ml	2900	0.45							20220127_SR2DLT_Ab
AB01974179	01	Ainno_16251	Ainnocence	AIN1-33_AINNL0033	Lot# MB15NO4133	TC00820835	A012	0.3396	ng/ml	2625	-0.06							20220127_SR2DLT_Ab
AB01974179	01	Ainno_16251	Ainnocence	AIN1-33_AINNL0033	Lot# MB15NO4133	TC00820834	A012	0.3396	ng/ml	2775	0.28							20220127_SR2DLT_Ab
AB01974179	01	Ainno_16251	Ainnocence	AIN1-33_AINNL0033	Lot# MB15NO4133	TC00820835	A013	0.1075	ng/ml	2450	-0.3							20220127_SR2DLT_Ab
AB01974179	01	Ainno_16251	Ainnocence	AIN1-33_AINNL0033	Lot# MB15NO4133	TC00820834	A013	0.1075	ng/ml	2450	-0.17							20220127_SR2DLT_Ab
AB01974179	01	Ainno_16251	Ainnocence	AIN1-33_AINNL0033	Lot# MB15NO4133	TC00820835	A014	0.03401	ng/ml	1875	-1.09							20220127_SR2DLT_Ab
AB01974179	01	Ainno_16251	Ainnocence	AIN1-33_AINNL0033	Lot# MB15NO4133	TC00820834	A014	0.03401	ng/ml	1625	-1.3							20220127_SR2DLT_Ab
AB01974179	01	Ainno_16251	Ainnocence	AIN1-33_AINNL0033	Lot# MB15NO4133	TC00820835	A015	0.01076	ng/ml	3050	0.53							20220127_SR2DLT_Ab
AB01974179	01	Ainno_16251	Ainnocence	AIN1-33_AINNL0033	Lot# MB15NO4133	TC00820834	A015	0.01076	ng/ml	3225	0.9							20220127_SR2DLT_Ab
AB01974179	01	Ainno_16251	Ainnocence	AIN1-33_AINNL0033	Lot# MB15NO4133	TC00820835	A016	0.003406	ng/ml	2400	-0.37							20220127_SR2DLT_Ab
AB01974179	01	Ainno_16251	Ainnocence	AIN1-33_AINNL0033	Lot# MB15NO4133	TC00820834	A016	0.003406	ng/ml	2650	0.11							20220127_SR2DLT_Ab
AB01974179	01	Ainno_16251	Ainnocence	AIN1-33_AINNL0033	Lot# MB15NO4133	TC00820835	A017	0.001078	ng/ml	2025	-0.89							20220127_SR2DLT_Ab
AB01974179	01	Ainno_16251	Ainnocence	AIN1-33_AINNL0033	Lot# MB15NO4133	TC00820834	A017	0.001078	ng/ml	2275	-0.41							20220127_SR2DLT_Ab
AB01974179	01	Ainno_16251	Ainnocence	AIN1-33_AINNL0033	Lot# MB15NO4133	TC00820835	A018	0.0003411	ng/ml	2650	-0.03							20220127_SR2DLT_Ab
AB01974179	01	Ainno_16251	Ainnocence	AIN1-33_AINNL0033	Lot# MB15NO4133	TC00820834	A018	0.0003411	ng/ml	1825	-1.03							20220127_SR2DLT_Ab
AB01974179	01	Ainno_16251	Ainnocence	AIN1-33_AINNL0033	Lot# MB15NO4133	TC00820835	A019	0.0001079	ng/ml	2300	-0.51							20220127_SR2DLT_Ab
AB01974179	01	Ainno_16251	Ainnocence	AIN1-33_AINNL0033	Lot# MB15NO4133	TC00820834	A019	0.0001079	ng/ml	2275	-0.41							20220127_SR2DLT_Ab
AB01974179	01	Ainno_16251	Ainnocence	AIN1-33_AINNL0033	Lot# MB15NO4133	TC00820835	A020	3.416e-05	ng/ml	2450	-0.3							20220127_SR2DLT_Ab
AB01974179	01	Ainno_16251	Ainnocence	AIN1-33_AINNL0033	Lot# MB15NO4133	TC00820834	A020	3.416e-05	ng/ml	2200	-0.51							20220127_SR2DLT_Ab
AB01974179	01	Ainno_16251	Ainnocence	AIN1-33_AINNL0033	Lot# MB15NO4133	TC00820835	A021	1.081e-05	ng/ml	2475	-0.27							20220127_SR2DLT_Ab
AB01974179	01	Ainno_16251	Ainnocence	AIN1-33_AINNL0033	Lot# MB15NO4133	TC00820834	A021	1.081e-05	ng/ml	2525	-0.06							20220127_SR2DLT_Ab
AB01974179	01	Ainno_16251	Ainnocence	AIN1-33_AINNL0033	Lot# MB15NO4133	TC00820835	A022	3.421e-06	ng/ml	2525	-0.2							20220127_SR2DLT_Ab
AB01974179	01	Ainno_16251	Ainnocence	AIN1-33_AINNL0033	Lot# MB15NO4133	TC00820834	A022	3.421e-06	ng/ml	2825	0.35							20220127_SR2DLT_Ab
AB01974180	01	Ainno_16251	Ainnocence	AIN1-36_AINNL0036	Lot# MB15NO4136	TC00820835	B003	9440	ng/ml	2600	-0.09	>9440	Inactive	-1	0.77	0	40	20220127_SR2DLT_Ab
AB01974180	01	Ainno_16251	Ainnocence	AIN1-36_AINNL0036	Lot# MB15NO4136	TC00820834	B003	9440	ng/ml	3250	0.93							20220127_SR2DLT_Ab
AB01974180	01	Ainno_16251	Ainnocence	AIN1-36_AINNL0036	Lot# MB15NO4136	TC00820835	B004	2987	ng/ml	1875	-1.09							20220127_SR2DLT_Ab
AB01974180	01	Ainno_16251	Ainnocence	AIN1-36_AINNL0036	Lot# MB15NO4136	TC00820834	B004	2987	ng/ml	2950	0.52							20220127_SR2DLT_Ab
AB01974180	01	Ainno_16251	Ainnocence	AIN1-36_AINNL0036	Lot# MB15NO4136	TC00820835	B005	945.4	ng/ml	2600	-0.09							20220127_SR2DLT_Ab
AB01974180	01	Ainno_16251	Ainnocence	AIN1-36_AINNL0036	Lot# MB15NO4136	TC00820834	B005	945.4	ng/ml	4150	2.17							20220127_SR2DLT_Ab
AB01974180	01	Ainno_16251	Ainnocence	AIN1-36_AINNL0036	Lot# MB15NO4136	TC00820835	B006	299.2	ng/ml	2100	-0.78							20220127_SR2DLT_Ab
AB01974180	01	Ainno_16251	Ainnocence	AIN1-36_AINNL0036	Lot# MB15NO4136	TC00820834	B006	299.2	ng/ml	2200	-0.51							20220127_SR2DLT_Ab
AB01974180	01	Ainno_16251	Ainnocence	AIN1-36_AINNL0036	Lot# MB15NO4136	TC00820835	B007	94.67	ng/ml	2150	-0.71							20220127_SR2DLT_Ab
AB01974180	01	Ainno_16251	Ainnocence	AIN1-36_AINNL0036	Lot# MB15NO4136	TC00820834	B007	94.67	ng/ml	2525	-0.06							20220127_SR2DLT_Ab
AB01974180	01	Ainno_16251	Ainnocence	AIN1-36_AINNL0036	Lot# MB15NO4136	TC00820835	B008	29.96	ng/ml	1750	-1.27							20220127_SR2DLT_Ab
AB01974180	01	Ainno_16251	Ainnocence	AIN1-36_AINNL0036	Lot# MB15NO4136	TC00820834	B008	29.96	ng/ml	1500	-1.48							20220127_SR2DLT_Ab
AB01974180	01	Ainno_16251	Ainnocence	AIN1-36_AINNL0036	Lot# MB15NO4136	TC00820835	B009	9.481	ng/ml	2750	0.11							20220127_SR2DLT_Ab
AB01974180	01	Ainno_16251	Ainnocence	AIN1-36_AINNL0036	Lot# MB15NO4136	TC00820834	B009	9.481	ng/ml	2025	-0.75							20220127_SR2DLT_Ab
AB01974180	01	Ainno_16251	Ainnocence	AIN1-36_AINNL0036	Lot# MB15NO4136	TC00820835	B010	3	ng/ml	2125	-0.75							20220127_SR2DLT_Ab
AB01974180	01	Ainno_16251	Ainnocence	AIN1-36_AINNL0036	Lot# MB15NO4136	TC00820834	B010	3	ng/ml	2600	0.04							20220127_SR2DLT_Ab
AB01974180	01	Ainno_16251	Ainnocence	AIN1-36_AINNL0036	Lot# MB15NO4136	TC00820835	B011	0.9495	ng/ml	2800	0.18							20220127_SR2DLT_Ab
AB01974180	01	Ainno_16251	Ainnocence	AIN1-36_AINNL0036	Lot# MB15NO4136	TC00820834	B011	0.9495	ng/ml	1850	-0.99							20220127_SR2DLT_Ab
AB01974180	01	Ainno_16251	Ainnocence	AIN1-36_AINNL0036	Lot# MB15NO4136	TC00820835	B012	0.3005	ng/ml	2250	-0.58							20220127_SR2DLT_Ab
AB01974180	01	Ainno_16251	Ainnocence	AIN1-36_AINNL0036	Lot# MB15NO4136	TC00820834	B012	0.3005	ng/ml	2025	-0.75							20220127_SR2DLT_Ab
AB01974180	01	Ainno_16251	Ainnocence	AIN1-36_AINNL0036	Lot# MB15NO4136	TC00820835	B013	0.09508	ng/ml	3000	0.46							20220127_SR2DLT_Ab
AB01974180	01	Ainno_16251	Ainnocence	AIN1-36_AINNL0036	Lot# MB15NO4136	TC00820834	B013	0.09508	ng/ml	1725	-1.17							20220127_SR2DLT_Ab
AB01974180	01	Ainno_16251	Ainnocence	AIN1-36_AINNL0036	Lot# MB15NO4136	TC00820835	B014	0.03009	ng/ml	2175	-0.68							20220127_SR2DLT_Ab
AB01974180	01	Ainno_16251	Ainnocence	AIN1-36_AINNL0036	Lot# MB15NO4136	TC00820834	B014	0.03009	ng/ml	1750	-1.13							20220127_SR2DLT_Ab
AB01974180	01	Ainno_16251	Ainnocence	AIN1-36_AINNL0036	Lot# MB15NO4136	TC00820835	B015	0.009522	ng/ml	2350	-0.44							20220127_SR2DLT_Ab
AB01974180	01	Ainno_16251	Ainnocence	AIN1-36_AINNL0036	Lot# MB15NO4136	TC00820834	B015	0.009522	ng/ml	1950	-0.86							20220127_SR2DLT_Ab
AB01974180	01	Ainno_16251	Ainnocence	AIN1-36_AINNL0036	Lot# MB15NO4136	TC00820835	B016	0.003013	ng/ml	2350	-0.44							20220127_SR2DLT_Ab
AB01974180	01	Ainno_16251	Ainnocence	AIN1-36_AINNL0036	Lot# MB15NO4136	TC00820834	B016	0.003013	ng/ml	3000	0.59							20220127_SR2DLT_Ab
AB01974180	01	Ainno_16251	Ainnocence	AIN1-36_AINNL0036	Lot# MB15NO4136	TC00820835	B017	0.0009536	ng/ml	2300	-0.51							20220127_SR2DLT_Ab
AB01974180	01	Ainno_16251	Ainnocence	AIN1-36_AINNL0036	Lot# MB15NO4136	TC00820834	B017	0.0009536	ng/ml	2525	-0.06							20220127_SR2DLT_Ab
AB01974180	01	Ainno_16251	Ainnocence	AIN1-36_AINNL0036	Lot# MB15NO4136	TC00820835	B018	0.0003018	ng/ml	2825	0.22							20220127_SR2DLT_Ab
AB01974180	01	Ainno_16251	Ainnocence	AIN1-36_AINNL0036	Lot# MB15NO4136	TC00820834	B018	0.0003018	ng/ml	2300	-0.37							20220127_SR2DLT_Ab
AB01974180	01	Ainno_16251	Ainnocence	AIN1-36_AINNL0036	Lot# MB15NO4136	TC00820835	B019	9.549e-05	ng/ml	2825	0.22							20220127_SR2DLT_Ab
AB01974180	01	Ainno_16251	Ainnocence	AIN1-36_AINNL0036	Lot# MB15NO4136	TC00820834	B019	9.549e-05	ng/ml	2625	0.07							20220127_SR2DLT_Ab
AB01974180	01	Ainno_16251	Ainnocence	AIN1-36_AINNL0036	Lot# MB15NO4136	TC00820835	B020	3.022e-05	ng/ml	3000	0.46							20220127_SR2DLT_Ab
AB01974180	01	Ainno_16251	Ainnocence	AIN1-36_AINNL0036	Lot# MB15NO4136	TC00820834	B020	3.022e-05	ng/ml	1900	-0.92							20220127_SR2DLT_Ab
AB01974180	01	Ainno_16251	Ainnocence	AIN1-36_AINNL0036	Lot# MB15NO4136	TC00820835	B021	9.563e-06	ng/ml	3200	0.73							20220127_SR2DLT_Ab
AB01974180	01	Ainno_16251	Ainnocence	AIN1-36_AINNL0036	Lot# MB15NO4136	TC00820834	B021	9.563e-06	ng/ml	2700	0.18							20220127_SR2DLT_Ab
AB01974180	01	Ainno_16251	Ainnocence	AIN1-36_AINNL0036	Lot# MB15NO4136	TC00820835	B022	3.026e-06	ng/ml	2200	-0.65							20220127_SR2DLT_Ab
AB01974180	01	Ainno_16251	Ainnocence	AIN1-36_AINNL0036	Lot# MB15NO4136	TC00820834	B022	3.026e-06	ng/ml	2575	0							20220127_SR2DLT_Ab
AB01974181	01	Ainno_16251	Ainnocence	AIN1-1_AINNL0001	Lot# MB15NO4101	TC00820835	C003	11000	ng/ml	3225	0.77	>11000	Inactive	-0.73	0.7	0	40	20220127_SR2DLT_Ab
AB01974181	01	Ainno_16251	Ainnocence	AIN1-1_AINNL0001	Lot# MB15NO4101	TC00820834	C003	11000	ng/ml	2425	-0.2							20220127_SR2DLT_Ab
AB01974181	01	Ainno_16251	Ainnocence	AIN1-1_AINNL0001	Lot# MB15NO4101	TC00820835	C004	3481	ng/ml	2475	-0.27							20220127_SR2DLT_Ab
AB01974181	01	Ainno_16251	Ainnocence	AIN1-1_AINNL0001	Lot# MB15NO4101	TC00820834	C004	3481	ng/ml	2475	-0.13							20220127_SR2DLT_Ab
AB01974181	01	Ainno_16251	Ainnocence	AIN1-1_AINNL0001	Lot# MB15NO4101	TC00820835	C005	1102	ng/ml	2350	-0.44							20220127_SR2DLT_Ab
AB01974181	01	Ainno_16251	Ainnocence	AIN1-1_AINNL0001	Lot# MB15NO4101	TC00820834	C005	1102	ng/ml	2075	-0.68							20220127_SR2DLT_Ab
AB01974181	01	Ainno_16251	Ainnocence	AIN1-1_AINNL0001	Lot# MB15NO4101	TC00820835	C006	348.6	ng/ml	2575	-0.13							20220127_SR2DLT_Ab
AB01974181	01	Ainno_16251	Ainnocence	AIN1-1_AINNL0001	Lot# MB15NO4101	TC00820834	C006	348.6	ng/ml	2900	0.45							20220127_SR2DLT_Ab
AB01974181	01	Ainno_16251	Ainnocence	AIN1-1_AINNL0001	Lot# MB15NO4101	TC00820835	C007	110.3	ng/ml	1875	-1.09							20220127_SR2DLT_Ab
AB01974181	01	Ainno_16251	Ainnocence	AIN1-1_AINNL0001	Lot# MB15NO4101	TC00820834	C007	110.3	ng/ml	1975	-0.82							20220127_SR2DLT_Ab
AB01974181	01	Ainno_16251	Ainnocence	AIN1-1_AINNL0001	Lot# MB15NO4101	TC00820835	C008	34.91	ng/ml	3150	0.66							20220127_SR2DLT_Ab
AB01974181	01	Ainno_16251	Ainnocence	AIN1-1_AINNL0001	Lot# MB15NO4101	TC00820834	C008	34.91	ng/ml	2800	0.31							20220127_SR2DLT_Ab
AB01974181	01	Ainno_16251	Ainnocence	AIN1-1_AINNL0001	Lot# MB15NO4101	TC00820835	C009	11.05	ng/ml	2075	-0.82							20220127_SR2DLT_Ab
AB01974181	01	Ainno_16251	Ainnocence	AIN1-1_AINNL0001	Lot# MB15NO4101	TC00820834	C009	11.05	ng/ml	2600	0.04							20220127_SR2DLT_Ab
AB01974181	01	Ainno_16251	Ainnocence	AIN1-1_AINNL0001	Lot# MB15NO4101	TC00820835	C010	3.496	ng/ml	2525	-0.2							20220127_SR2DLT_Ab
AB01974181	01	Ainno_16251	Ainnocence	AIN1-1_AINNL0001	Lot# MB15NO4101	TC00820834	C010	3.496	ng/ml	2000	-0.79							20220127_SR2DLT_Ab
AB01974181	01	Ainno_16251	Ainnocence	AIN1-1_AINNL0001	Lot# MB15NO4101	TC00820835	C011	1.106	ng/ml	2175	-0.68							20220127_SR2DLT_Ab
AB01974181	01	Ainno_16251	Ainnocence	AIN1-1_AINNL0001	Lot# MB15NO4101	TC00820834	C011	1.106	ng/ml	1675	-1.23							20220127_SR2DLT_Ab
AB01974181	01	Ainno_16251	Ainnocence	AIN1-1_AINNL0001	Lot# MB15NO4101	TC00820835	C012	0.3501	ng/ml	3100	0.59							20220127_SR2DLT_Ab
AB01974181	01	Ainno_16251	Ainnocence	AIN1-1_AINNL0001	Lot# MB15NO4101	TC00820834	C012	0.3501	ng/ml	2500	-0.1							20220127_SR2DLT_Ab
AB01974181	01	Ainno_16251	Ainnocence	AIN1-1_AINNL0001	Lot# MB15NO4101	TC00820835	C013	0.1108	ng/ml	2500	-0.23							20220127_SR2DLT_Ab
AB01974181	01	Ainno_16251	Ainnocence	AIN1-1_AINNL0001	Lot# MB15NO4101	TC00820834	C013	0.1108	ng/ml	3225	0.9							20220127_SR2DLT_Ab
AB01974181	01	Ainno_16251	Ainnocence	AIN1-1_AINNL0001	Lot# MB15NO4101	TC00820835	C014	0.03506	ng/ml	2425	-0.34							20220127_SR2DLT_Ab
AB01974181	01	Ainno_16251	Ainnocence	AIN1-1_AINNL0001	Lot# MB15NO4101	TC00820834	C014	0.03506	ng/ml	3950	1.9							20220127_SR2DLT_Ab
AB01974181	01	Ainno_16251	Ainnocence	AIN1-1_AINNL0001	Lot# MB15NO4101	TC00820835	C015	0.0111	ng/ml	2650	-0.03							20220127_SR2DLT_Ab
AB01974181	01	Ainno_16251	Ainnocence	AIN1-1_AINNL0001	Lot# MB15NO4101	TC00820834	C015	0.0111	ng/ml	2725	0.21							20220127_SR2DLT_Ab
AB01974181	01	Ainno_16251	Ainnocence	AIN1-1_AINNL0001	Lot# MB15NO4101	TC00820835	C016	0.003511	ng/ml	2325	-0.47							20220127_SR2DLT_Ab
AB01974181	01	Ainno_16251	Ainnocence	AIN1-1_AINNL0001	Lot# MB15NO4101	TC00820834	C016	0.003511	ng/ml	3200	0.86							20220127_SR2DLT_Ab
AB01974181	01	Ainno_16251	Ainnocence	AIN1-1_AINNL0001	Lot# MB15NO4101	TC00820835	C017	0.001111	ng/ml	2450	-0.3							20220127_SR2DLT_Ab
AB01974181	01	Ainno_16251	Ainnocence	AIN1-1_AINNL0001	Lot# MB15NO4101	TC00820834	C017	0.001111	ng/ml	1825	-1.03							20220127_SR2DLT_Ab
AB01974181	01	Ainno_16251	Ainnocence	AIN1-1_AINNL0001	Lot# MB15NO4101	TC00820835	C018	0.0003516	ng/ml	3250	0.8							20220127_SR2DLT_Ab
AB01974181	01	Ainno_16251	Ainnocence	AIN1-1_AINNL0001	Lot# MB15NO4101	TC00820834	C018	0.0003516	ng/ml	2050	-0.72							20220127_SR2DLT_Ab
AB01974181	01	Ainno_16251	Ainnocence	AIN1-1_AINNL0001	Lot# MB15NO4101	TC00820835	C019	0.0001113	ng/ml	2950	0.39							20220127_SR2DLT_Ab
AB01974181	01	Ainno_16251	Ainnocence	AIN1-1_AINNL0001	Lot# MB15NO4101	TC00820834	C019	0.0001113	ng/ml	2475	-0.13							20220127_SR2DLT_Ab
AB01974181	01	Ainno_16251	Ainnocence	AIN1-1_AINNL0001	Lot# MB15NO4101	TC00820835	C020	3.521e-05	ng/ml	1700	-1.34							20220127_SR2DLT_Ab
AB01974181	01	Ainno_16251	Ainnocence	AIN1-1_AINNL0001	Lot# MB15NO4101	TC00820834	C020	3.521e-05	ng/ml	2675	0.14							20220127_SR2DLT_Ab
AB01974181	01	Ainno_16251	Ainnocence	AIN1-1_AINNL0001	Lot# MB15NO4101	TC00820835	C021	1.114e-05	ng/ml	2225	-0.61							20220127_SR2DLT_Ab
AB01974181	01	Ainno_16251	Ainnocence	AIN1-1_AINNL0001	Lot# MB15NO4101	TC00820834	C021	1.114e-05	ng/ml	2625	0.07							20220127_SR2DLT_Ab
AB01974181	01	Ainno_16251	Ainnocence	AIN1-1_AINNL0001	Lot# MB15NO4101	TC00820835	C022	3.526e-06	ng/ml	2550	-0.16							20220127_SR2DLT_Ab
AB01974181	01	Ainno_16251	Ainnocence	AIN1-1_AINNL0001	Lot# MB15NO4101	TC00820834	C022	3.526e-06	ng/ml	3100	0.73							20220127_SR2DLT_Ab
AB01974183	01	Ainno_16251	Ainnocence	AIN1-2_AINNL0002	Lot# MB15NO2511	TC00820835	E003	4780	ng/ml	2675	0.01	>4780	Inactive	-0.87	0.63	0	40	20220127_SR2DLT_Ab
AB01974183	01	Ainno_16251	Ainnocence	AIN1-2_AINNL0002	Lot# MB15NO2511	TC00820834	E003	4780	ng/ml	2875	0.42							20220127_SR2DLT_Ab
AB01974183	01	Ainno_16251	Ainnocence	AIN1-2_AINNL0002	Lot# MB15NO2511	TC00820835	E004	1513	ng/ml	2275	-0.54							20220127_SR2DLT_Ab
AB01974183	01	Ainno_16251	Ainnocence	AIN1-2_AINNL0002	Lot# MB15NO2511	TC00820834	E004	1513	ng/ml	2525	-0.06							20220127_SR2DLT_Ab
AB01974183	01	Ainno_16251	Ainnocence	AIN1-2_AINNL0002	Lot# MB15NO2511	TC00820835	E005	478.7	ng/ml	2175	-0.68							20220127_SR2DLT_Ab
AB01974183	01	Ainno_16251	Ainnocence	AIN1-2_AINNL0002	Lot# MB15NO2511	TC00820834	E005	478.7	ng/ml	2825	0.35							20220127_SR2DLT_Ab
AB01974183	01	Ainno_16251	Ainnocence	AIN1-2_AINNL0002	Lot# MB15NO2511	TC00820835	E006	151.5	ng/ml	2125	-0.75							20220127_SR2DLT_Ab
AB01974183	01	Ainno_16251	Ainnocence	AIN1-2_AINNL0002	Lot# MB15NO2511	TC00820834	E006	151.5	ng/ml	1950	-0.86							20220127_SR2DLT_Ab
AB01974183	01	Ainno_16251	Ainnocence	AIN1-2_AINNL0002	Lot# MB15NO2511	TC00820835	E007	47.94	ng/ml	2300	-0.51							20220127_SR2DLT_Ab
AB01974183	01	Ainno_16251	Ainnocence	AIN1-2_AINNL0002	Lot# MB15NO2511	TC00820834	E007	47.94	ng/ml	2475	-0.13							20220127_SR2DLT_Ab
AB01974183	01	Ainno_16251	Ainnocence	AIN1-2_AINNL0002	Lot# MB15NO2511	TC00820835	E008	15.17	ng/ml	2975	0.42							20220127_SR2DLT_Ab
AB01974183	01	Ainno_16251	Ainnocence	AIN1-2_AINNL0002	Lot# MB15NO2511	TC00820834	E008	15.17	ng/ml	2925	0.49							20220127_SR2DLT_Ab
AB01974183	01	Ainno_16251	Ainnocence	AIN1-2_AINNL0002	Lot# MB15NO2511	TC00820835	E009	4.801	ng/ml	2525	-0.2							20220127_SR2DLT_Ab
AB01974183	01	Ainno_16251	Ainnocence	AIN1-2_AINNL0002	Lot# MB15NO2511	TC00820834	E009	4.801	ng/ml	2375	-0.27							20220127_SR2DLT_Ab
AB01974183	01	Ainno_16251	Ainnocence	AIN1-2_AINNL0002	Lot# MB15NO2511	TC00820835	E010	1.519	ng/ml	2775	0.15							20220127_SR2DLT_Ab
AB01974183	01	Ainno_16251	Ainnocence	AIN1-2_AINNL0002	Lot# MB15NO2511	TC00820834	E010	1.519	ng/ml	2675	0.14							20220127_SR2DLT_Ab
AB01974183	01	Ainno_16251	Ainnocence	AIN1-2_AINNL0002	Lot# MB15NO2511	TC00820835	E011	0.4808	ng/ml	3400	1.01							20220127_SR2DLT_Ab
AB01974183	01	Ainno_16251	Ainnocence	AIN1-2_AINNL0002	Lot# MB15NO2511	TC00820834	E011	0.4808	ng/ml	1925	-0.89							20220127_SR2DLT_Ab
AB01974183	01	Ainno_16251	Ainnocence	AIN1-2_AINNL0002	Lot# MB15NO2511	TC00820835	E012	0.1521	ng/ml	2600	-0.09							20220127_SR2DLT_Ab
AB01974183	01	Ainno_16251	Ainnocence	AIN1-2_AINNL0002	Lot# MB15NO2511	TC00820834	E012	0.1521	ng/ml	2400	-0.24							20220127_SR2DLT_Ab
AB01974183	01	Ainno_16251	Ainnocence	AIN1-2_AINNL0002	Lot# MB15NO2511	TC00820835	E013	0.04815	ng/ml	2975	0.42							20220127_SR2DLT_Ab
AB01974183	01	Ainno_16251	Ainnocence	AIN1-2_AINNL0002	Lot# MB15NO2511	TC00820834	E013	0.04815	ng/ml	2500	-0.1							20220127_SR2DLT_Ab
AB01974183	01	Ainno_16251	Ainnocence	AIN1-2_AINNL0002	Lot# MB15NO2511	TC00820835	E014	0.01524	ng/ml	3475	1.11							20220127_SR2DLT_Ab
AB01974183	01	Ainno_16251	Ainnocence	AIN1-2_AINNL0002	Lot# MB15NO2511	TC00820834	E014	0.01524	ng/ml	3175	0.83							20220127_SR2DLT_Ab
AB01974183	01	Ainno_16251	Ainnocence	AIN1-2_AINNL0002	Lot# MB15NO2511	TC00820835	E015	0.004822	ng/ml	2700	0.04							20220127_SR2DLT_Ab
AB01974183	01	Ainno_16251	Ainnocence	AIN1-2_AINNL0002	Lot# MB15NO2511	TC00820834	E015	0.004822	ng/ml	1750	-1.13							20220127_SR2DLT_Ab
AB01974183	01	Ainno_16251	Ainnocence	AIN1-2_AINNL0002	Lot# MB15NO2511	TC00820835	E016	0.001526	ng/ml	3100	0.59							20220127_SR2DLT_Ab
AB01974183	01	Ainno_16251	Ainnocence	AIN1-2_AINNL0002	Lot# MB15NO2511	TC00820834	E016	0.001526	ng/ml	2700	0.18							20220127_SR2DLT_Ab
AB01974183	01	Ainno_16251	Ainnocence	AIN1-2_AINNL0002	Lot# MB15NO2511	TC00820835	E017	0.0004828	ng/ml	2100	-0.78							20220127_SR2DLT_Ab
AB01974183	01	Ainno_16251	Ainnocence	AIN1-2_AINNL0002	Lot# MB15NO2511	TC00820834	E017	0.0004828	ng/ml	1750	-1.13							20220127_SR2DLT_Ab
AB01974183	01	Ainno_16251	Ainnocence	AIN1-2_AINNL0002	Lot# MB15NO2511	TC00820835	E018	0.0001528	ng/ml	3250	0.8							20220127_SR2DLT_Ab
AB01974183	01	Ainno_16251	Ainnocence	AIN1-2_AINNL0002	Lot# MB15NO2511	TC00820834	E018	0.0001528	ng/ml	2800	0.31							20220127_SR2DLT_Ab
AB01974183	01	Ainno_16251	Ainnocence	AIN1-2_AINNL0002	Lot# MB15NO2511	TC00820835	E019	4.835e-05	ng/ml	2175	-0.68							20220127_SR2DLT_Ab
AB01974183	01	Ainno_16251	Ainnocence	AIN1-2_AINNL0002	Lot# MB15NO2511	TC00820834	E019	4.835e-05	ng/ml	3250	0.93							20220127_SR2DLT_Ab
AB01974183	01	Ainno_16251	Ainnocence	AIN1-2_AINNL0002	Lot# MB15NO2511	TC00820835	E020	1.53e-05	ng/ml	3100	0.59							20220127_SR2DLT_Ab
AB01974183	01	Ainno_16251	Ainnocence	AIN1-2_AINNL0002	Lot# MB15NO2511	TC00820834	E020	1.53e-05	ng/ml	1675	-1.23							20220127_SR2DLT_Ab
AB01974183	01	Ainno_16251	Ainnocence	AIN1-2_AINNL0002	Lot# MB15NO2511	TC00820835	E021	4.842e-06	ng/ml	2600	-0.09							20220127_SR2DLT_Ab
AB01974183	01	Ainno_16251	Ainnocence	AIN1-2_AINNL0002	Lot# MB15NO2511	TC00820834	E021	4.842e-06	ng/ml	2600	0.04							20220127_SR2DLT_Ab
AB01974183	01	Ainno_16251	Ainnocence	AIN1-2_AINNL0002	Lot# MB15NO2511	TC00820835	E022	1.532e-06	ng/ml	2850	0.25							20220127_SR2DLT_Ab
AB01974183	01	Ainno_16251	Ainnocence	AIN1-2_AINNL0002	Lot# MB15NO2511	TC00820834	E022	1.532e-06	ng/ml	2125	-0.62							20220127_SR2DLT_Ab
AB01974184	01	Ainno_16251	Ainnocence	AIN1-4_AINNL0004	Lot# MB15NO4104	TC00820835	F003	5670	ng/ml	2500	-0.23	>5670	Inactive	5.44	0.78	>9999	40	20220127_SR2DLT_Ab
AB01974184	01	Ainno_16251	Ainnocence	AIN1-4_AINNL0004	Lot# MB15NO4104	TC00820834	F003	5670	ng/ml	2600	0.04							20220127_SR2DLT_Ab
AB01974184	01	Ainno_16251	Ainnocence	AIN1-4_AINNL0004	Lot# MB15NO4104	TC00820835	F004	1794	ng/ml	2625	-0.06							20220127_SR2DLT_Ab
AB01974184	01	Ainno_16251	Ainnocence	AIN1-4_AINNL0004	Lot# MB15NO4104	TC00820834	F004	1794	ng/ml	2225	-0.48							20220127_SR2DLT_Ab
AB01974184	01	Ainno_16251	Ainnocence	AIN1-4_AINNL0004	Lot# MB15NO4104	TC00820835	F005	567.8	ng/ml	3400	1.01							20220127_SR2DLT_Ab
AB01974184	01	Ainno_16251	Ainnocence	AIN1-4_AINNL0004	Lot# MB15NO4104	TC00820834	F005	567.8	ng/ml	2500	-0.1							20220127_SR2DLT_Ab
AB01974184	01	Ainno_16251	Ainnocence	AIN1-4_AINNL0004	Lot# MB15NO4104	TC00820835	F006	179.7	ng/ml	2175	-0.68							20220127_SR2DLT_Ab
AB01974184	01	Ainno_16251	Ainnocence	AIN1-4_AINNL0004	Lot# MB15NO4104	TC00820834	F006	179.7	ng/ml	2375	-0.27							20220127_SR2DLT_Ab
AB01974184	01	Ainno_16251	Ainnocence	AIN1-4_AINNL0004	Lot# MB15NO4104	TC00820835	F007	56.86	ng/ml	3325	0.9							20220127_SR2DLT_Ab
AB01974184	01	Ainno_16251	Ainnocence	AIN1-4_AINNL0004	Lot# MB15NO4104	TC00820834	F007	56.86	ng/ml	3500	1.28							20220127_SR2DLT_Ab
AB01974184	01	Ainno_16251	Ainnocence	AIN1-4_AINNL0004	Lot# MB15NO4104	TC00820835	F008	17.99	ng/ml	2225	-0.61							20220127_SR2DLT_Ab
AB01974184	01	Ainno_16251	Ainnocence	AIN1-4_AINNL0004	Lot# MB15NO4104	TC00820834	F008	17.99	ng/ml	2975	0.55							20220127_SR2DLT_Ab
AB01974184	01	Ainno_16251	Ainnocence	AIN1-4_AINNL0004	Lot# MB15NO4104	TC00820835	F009	5.695	ng/ml	3675	1.39							20220127_SR2DLT_Ab
AB01974184	01	Ainno_16251	Ainnocence	AIN1-4_AINNL0004	Lot# MB15NO4104	TC00820834	F009	5.695	ng/ml	2975	0.55							20220127_SR2DLT_Ab
AB01974184	01	Ainno_16251	Ainnocence	AIN1-4_AINNL0004	Lot# MB15NO4104	TC00820835	F010	1.802	ng/ml	3000	0.46							20220127_SR2DLT_Ab
AB01974184	01	Ainno_16251	Ainnocence	AIN1-4_AINNL0004	Lot# MB15NO4104	TC00820834	F010	1.802	ng/ml	3625	1.45							20220127_SR2DLT_Ab
AB01974184	01	Ainno_16251	Ainnocence	AIN1-4_AINNL0004	Lot# MB15NO4104	TC00820835	F011	0.5703	ng/ml	2100	-0.78							20220127_SR2DLT_Ab
AB01974184	01	Ainno_16251	Ainnocence	AIN1-4_AINNL0004	Lot# MB15NO4104	TC00820834	F011	0.5703	ng/ml	2650	0.11							20220127_SR2DLT_Ab
AB01974184	01	Ainno_16251	Ainnocence	AIN1-4_AINNL0004	Lot# MB15NO4104	TC00820835	F012	0.1805	ng/ml	2900	0.32							20220127_SR2DLT_Ab
AB01974184	01	Ainno_16251	Ainnocence	AIN1-4_AINNL0004	Lot# MB15NO4104	TC00820834	F012	0.1805	ng/ml	2650	0.11							20220127_SR2DLT_Ab
AB01974184	01	Ainno_16251	Ainnocence	AIN1-4_AINNL0004	Lot# MB15NO4104	TC00820835	F013	0.05711	ng/ml	2600	-0.09							20220127_SR2DLT_Ab
AB01974184	01	Ainno_16251	Ainnocence	AIN1-4_AINNL0004	Lot# MB15NO4104	TC00820834	F013	0.05711	ng/ml	3025	0.62							20220127_SR2DLT_Ab
AB01974184	01	Ainno_16251	Ainnocence	AIN1-4_AINNL0004	Lot# MB15NO4104	TC00820835	F014	0.01807	ng/ml	4150	2.04							20220127_SR2DLT_Ab
AB01974184	01	Ainno_16251	Ainnocence	AIN1-4_AINNL0004	Lot# MB15NO4104	TC00820834	F014	0.01807	ng/ml	2275	-0.41							20220127_SR2DLT_Ab
AB01974184	01	Ainno_16251	Ainnocence	AIN1-4_AINNL0004	Lot# MB15NO4104	TC00820835	F015	0.005719	ng/ml	3100	0.59							20220127_SR2DLT_Ab
AB01974184	01	Ainno_16251	Ainnocence	AIN1-4_AINNL0004	Lot# MB15NO4104	TC00820834	F015	0.005719	ng/ml	2400	-0.24							20220127_SR2DLT_Ab
AB01974184	01	Ainno_16251	Ainnocence	AIN1-4_AINNL0004	Lot# MB15NO4104	TC00820835	F016	0.00181	ng/ml	3275	0.84							20220127_SR2DLT_Ab
AB01974184	01	Ainno_16251	Ainnocence	AIN1-4_AINNL0004	Lot# MB15NO4104	TC00820834	F016	0.00181	ng/ml	2050	-0.72							20220127_SR2DLT_Ab
AB01974184	01	Ainno_16251	Ainnocence	AIN1-4_AINNL0004	Lot# MB15NO4104	TC00820835	F017	0.0005727	ng/ml	4000	1.83							20220127_SR2DLT_Ab
AB01974184	01	Ainno_16251	Ainnocence	AIN1-4_AINNL0004	Lot# MB15NO4104	TC00820834	F017	0.0005727	ng/ml	2200	-0.51							20220127_SR2DLT_Ab
AB01974184	01	Ainno_16251	Ainnocence	AIN1-4_AINNL0004	Lot# MB15NO4104	TC00820835	F018	0.0001812	ng/ml	3100	0.59							20220127_SR2DLT_Ab
AB01974184	01	Ainno_16251	Ainnocence	AIN1-4_AINNL0004	Lot# MB15NO4104	TC00820834	F018	0.0001812	ng/ml	2825	0.35							20220127_SR2DLT_Ab
AB01974184	01	Ainno_16251	Ainnocence	AIN1-4_AINNL0004	Lot# MB15NO4104	TC00820835	F019	5.736e-05	ng/ml	2400	-0.37							20220127_SR2DLT_Ab
AB01974184	01	Ainno_16251	Ainnocence	AIN1-4_AINNL0004	Lot# MB15NO4104	TC00820834	F019	5.736e-05	ng/ml	2100	-0.65							20220127_SR2DLT_Ab
AB01974184	01	Ainno_16251	Ainnocence	AIN1-4_AINNL0004	Lot# MB15NO4104	TC00820835	F020	1.815e-05	ng/ml	3200	0.73							20220127_SR2DLT_Ab
AB01974184	01	Ainno_16251	Ainnocence	AIN1-4_AINNL0004	Lot# MB15NO4104	TC00820834	F020	1.815e-05	ng/ml	2675	0.14							20220127_SR2DLT_Ab
AB01974184	01	Ainno_16251	Ainnocence	AIN1-4_AINNL0004	Lot# MB15NO4104	TC00820835	F021	5.744e-06	ng/ml	2625	-0.06							20220127_SR2DLT_Ab
AB01974184	01	Ainno_16251	Ainnocence	AIN1-4_AINNL0004	Lot# MB15NO4104	TC00820834	F021	5.744e-06	ng/ml	2425	-0.2							20220127_SR2DLT_Ab
AB01974184	01	Ainno_16251	Ainnocence	AIN1-4_AINNL0004	Lot# MB15NO4104	TC00820835	F022	1.818e-06	ng/ml	1900	-1.06							20220127_SR2DLT_Ab
AB01974184	01	Ainno_16251	Ainnocence	AIN1-4_AINNL0004	Lot# MB15NO4104	TC00820834	F022	1.818e-06	ng/ml	2600	0.04							20220127_SR2DLT_Ab
AB01974185	01	Ainno_16251	Ainnocence	AIN1-13_AINNL0013	Lot# MB15NO4113	TC00820835	G003	10670	ng/ml	2725	0.08	>10670	Inactive	-1.01	0.62	0	40	20220127_SR2DLT_Ab
AB01974185	01	Ainno_16251	Ainnocence	AIN1-13_AINNL0013	Lot# MB15NO4113	TC00820834	G003	10670	ng/ml	2575	0							20220127_SR2DLT_Ab
AB01974185	01	Ainno_16251	Ainnocence	AIN1-13_AINNL0013	Lot# MB15NO4113	TC00820835	G004	3377	ng/ml	2675	0.01							20220127_SR2DLT_Ab
AB01974185	01	Ainno_16251	Ainnocence	AIN1-13_AINNL0013	Lot# MB15NO4113	TC00820834	G004	3377	ng/ml	2050	-0.72							20220127_SR2DLT_Ab
AB01974185	01	Ainno_16251	Ainnocence	AIN1-13_AINNL0013	Lot# MB15NO4113	TC00820835	G005	1069	ng/ml	2775	0.15							20220127_SR2DLT_Ab
AB01974185	01	Ainno_16251	Ainnocence	AIN1-13_AINNL0013	Lot# MB15NO4113	TC00820834	G005	1069	ng/ml	2275	-0.41							20220127_SR2DLT_Ab
AB01974185	01	Ainno_16251	Ainnocence	AIN1-13_AINNL0013	Lot# MB15NO4113	TC00820835	G006	338.1	ng/ml	2825	0.22							20220127_SR2DLT_Ab
AB01974185	01	Ainno_16251	Ainnocence	AIN1-13_AINNL0013	Lot# MB15NO4113	TC00820834	G006	338.1	ng/ml	2800	0.31							20220127_SR2DLT_Ab
AB01974185	01	Ainno_16251	Ainnocence	AIN1-13_AINNL0013	Lot# MB15NO4113	TC00820835	G007	107	ng/ml	2750	0.11							20220127_SR2DLT_Ab
AB01974185	01	Ainno_16251	Ainnocence	AIN1-13_AINNL0013	Lot# MB15NO4113	TC00820834	G007	107	ng/ml	2325	-0.34							20220127_SR2DLT_Ab
AB01974185	01	Ainno_16251	Ainnocence	AIN1-13_AINNL0013	Lot# MB15NO4113	TC00820835	G008	33.86	ng/ml	2325	-0.47							20220127_SR2DLT_Ab
AB01974185	01	Ainno_16251	Ainnocence	AIN1-13_AINNL0013	Lot# MB15NO4113	TC00820834	G008	33.86	ng/ml	2225	-0.48							20220127_SR2DLT_Ab
AB01974185	01	Ainno_16251	Ainnocence	AIN1-13_AINNL0013	Lot# MB15NO4113	TC00820835	G009	10.72	ng/ml	2900	0.32							20220127_SR2DLT_Ab
AB01974185	01	Ainno_16251	Ainnocence	AIN1-13_AINNL0013	Lot# MB15NO4113	TC00820834	G009	10.72	ng/ml	2325	-0.34							20220127_SR2DLT_Ab
AB01974185	01	Ainno_16251	Ainnocence	AIN1-13_AINNL0013	Lot# MB15NO4113	TC00820835	G010	3.391	ng/ml	2650	-0.03							20220127_SR2DLT_Ab
AB01974185	01	Ainno_16251	Ainnocence	AIN1-13_AINNL0013	Lot# MB15NO4113	TC00820834	G010	3.391	ng/ml	1925	-0.89							20220127_SR2DLT_Ab
AB01974185	01	Ainno_16251	Ainnocence	AIN1-13_AINNL0013	Lot# MB15NO4113	TC00820835	G011	1.073	ng/ml	3225	0.77							20220127_SR2DLT_Ab
AB01974185	01	Ainno_16251	Ainnocence	AIN1-13_AINNL0013	Lot# MB15NO4113	TC00820834	G011	1.073	ng/ml	2550	-0.03							20220127_SR2DLT_Ab
AB01974185	01	Ainno_16251	Ainnocence	AIN1-13_AINNL0013	Lot# MB15NO4113	TC00820835	G012	0.3396	ng/ml	2850	0.25							20220127_SR2DLT_Ab
AB01974185	01	Ainno_16251	Ainnocence	AIN1-13_AINNL0013	Lot# MB15NO4113	TC00820834	G012	0.3396	ng/ml	1675	-1.23							20220127_SR2DLT_Ab
AB01974185	01	Ainno_16251	Ainnocence	AIN1-13_AINNL0013	Lot# MB15NO4113	TC00820835	G013	0.1075	ng/ml	3025	0.49							20220127_SR2DLT_Ab
AB01974185	01	Ainno_16251	Ainnocence	AIN1-13_AINNL0013	Lot# MB15NO4113	TC00820834	G013	0.1075	ng/ml	2675	0.14							20220127_SR2DLT_Ab
AB01974185	01	Ainno_16251	Ainnocence	AIN1-13_AINNL0013	Lot# MB15NO4113	TC00820835	G014	0.03401	ng/ml	3075	0.56							20220127_SR2DLT_Ab
AB01974185	01	Ainno_16251	Ainnocence	AIN1-13_AINNL0013	Lot# MB15NO4113	TC00820834	G014	0.03401	ng/ml	2950	0.52							20220127_SR2DLT_Ab
AB01974185	01	Ainno_16251	Ainnocence	AIN1-13_AINNL0013	Lot# MB15NO4113	TC00820835	G015	0.01076	ng/ml	4075	1.94							20220127_SR2DLT_Ab
AB01974185	01	Ainno_16251	Ainnocence	AIN1-13_AINNL0013	Lot# MB15NO4113	TC00820834	G015	0.01076	ng/ml	2650	0.11							20220127_SR2DLT_Ab
AB01974185	01	Ainno_16251	Ainnocence	AIN1-13_AINNL0013	Lot# MB15NO4113	TC00820835	G016	0.003406	ng/ml	2125	-0.75							20220127_SR2DLT_Ab
AB01974185	01	Ainno_16251	Ainnocence	AIN1-13_AINNL0013	Lot# MB15NO4113	TC00820834	G016	0.003406	ng/ml	3300	1							20220127_SR2DLT_Ab
AB01974185	01	Ainno_16251	Ainnocence	AIN1-13_AINNL0013	Lot# MB15NO4113	TC00820835	G017	0.001078	ng/ml	2725	0.08							20220127_SR2DLT_Ab
AB01974185	01	Ainno_16251	Ainnocence	AIN1-13_AINNL0013	Lot# MB15NO4113	TC00820834	G017	0.001078	ng/ml	3125	0.76							20220127_SR2DLT_Ab
AB01974185	01	Ainno_16251	Ainnocence	AIN1-13_AINNL0013	Lot# MB15NO4113	TC00820835	G018	0.0003411	ng/ml	2775	0.15							20220127_SR2DLT_Ab
AB01974185	01	Ainno_16251	Ainnocence	AIN1-13_AINNL0013	Lot# MB15NO4113	TC00820834	G018	0.0003411	ng/ml	2350	-0.31							20220127_SR2DLT_Ab
AB01974185	01	Ainno_16251	Ainnocence	AIN1-13_AINNL0013	Lot# MB15NO4113	TC00820835	G019	0.0001079	ng/ml	3425	1.04							20220127_SR2DLT_Ab
AB01974185	01	Ainno_16251	Ainnocence	AIN1-13_AINNL0013	Lot# MB15NO4113	TC00820834	G019	0.0001079	ng/ml	3025	0.62							20220127_SR2DLT_Ab
AB01974185	01	Ainno_16251	Ainnocence	AIN1-13_AINNL0013	Lot# MB15NO4113	TC00820835	G020	3.416e-05	ng/ml	2350	-0.44							20220127_SR2DLT_Ab
AB01974185	01	Ainno_16251	Ainnocence	AIN1-13_AINNL0013	Lot# MB15NO4113	TC00820834	G020	3.416e-05	ng/ml	1875	-0.96							20220127_SR2DLT_Ab
AB01974185	01	Ainno_16251	Ainnocence	AIN1-13_AINNL0013	Lot# MB15NO4113	TC00820835	G021	1.081e-05	ng/ml	2575	-0.13							20220127_SR2DLT_Ab
AB01974185	01	Ainno_16251	Ainnocence	AIN1-13_AINNL0013	Lot# MB15NO4113	TC00820834	G021	1.081e-05	ng/ml	2800	0.31							20220127_SR2DLT_Ab
AB01974185	01	Ainno_16251	Ainnocence	AIN1-13_AINNL0013	Lot# MB15NO4113	TC00820835	G022	3.421e-06	ng/ml	2200	-0.65							20220127_SR2DLT_Ab
AB01974185	01	Ainno_16251	Ainnocence	AIN1-13_AINNL0013	Lot# MB15NO4113	TC00820834	G022	3.421e-06	ng/ml	2600	0.04							20220127_SR2DLT_Ab
AB01974186	01	Ainno_16251	Ainnocence	AIN1-15_AINNL0015	Lot# MB15NO4115	TC00820835	H003	10780	ng/ml	2100	-0.78	>10780	Inactive	0.99	1.11	>9999	40	20220127_SR2DLT_Ab
AB01974186	01	Ainno_16251	Ainnocence	AIN1-15_AINNL0015	Lot# MB15NO4115	TC00820834	H003	10780	ng/ml	4725	2.96							20220127_SR2DLT_Ab
AB01974186	01	Ainno_16251	Ainnocence	AIN1-15_AINNL0015	Lot# MB15NO4115	TC00820835	H004	3411	ng/ml	2525	-0.2							20220127_SR2DLT_Ab
AB01974186	01	Ainno_16251	Ainnocence	AIN1-15_AINNL0015	Lot# MB15NO4115	TC00820834	H004	3411	ng/ml	3275	0.97							20220127_SR2DLT_Ab
AB01974186	01	Ainno_16251	Ainnocence	AIN1-15_AINNL0015	Lot# MB15NO4115	TC00820835	H005	1080	ng/ml	3875	1.66							20220127_SR2DLT_Ab
AB01974186	01	Ainno_16251	Ainnocence	AIN1-15_AINNL0015	Lot# MB15NO4115	TC00820834	H005	1080	ng/ml	2875	0.42							20220127_SR2DLT_Ab
AB01974186	01	Ainno_16251	Ainnocence	AIN1-15_AINNL0015	Lot# MB15NO4115	TC00820835	H006	341.6	ng/ml	3150	0.66							20220127_SR2DLT_Ab
AB01974186	01	Ainno_16251	Ainnocence	AIN1-15_AINNL0015	Lot# MB15NO4115	TC00820834	H006	341.6	ng/ml	3125	0.76							20220127_SR2DLT_Ab
AB01974186	01	Ainno_16251	Ainnocence	AIN1-15_AINNL0015	Lot# MB15NO4115	TC00820835	H007	108.1	ng/ml	3100	0.59							20220127_SR2DLT_Ab
AB01974186	01	Ainno_16251	Ainnocence	AIN1-15_AINNL0015	Lot# MB15NO4115	TC00820834	H007	108.1	ng/ml	2825	0.35							20220127_SR2DLT_Ab
AB01974186	01	Ainno_16251	Ainnocence	AIN1-15_AINNL0015	Lot# MB15NO4115	TC00820835	H008	34.21	ng/ml	3200	0.73							20220127_SR2DLT_Ab
AB01974186	01	Ainno_16251	Ainnocence	AIN1-15_AINNL0015	Lot# MB15NO4115	TC00820834	H008	34.21	ng/ml	1900	-0.92							20220127_SR2DLT_Ab
AB01974186	01	Ainno_16251	Ainnocence	AIN1-15_AINNL0015	Lot# MB15NO4115	TC00820835	H009	10.83	ng/ml	2200	-0.65							20220127_SR2DLT_Ab
AB01974186	01	Ainno_16251	Ainnocence	AIN1-15_AINNL0015	Lot# MB15NO4115	TC00820834	H009	10.83	ng/ml	2825	0.35							20220127_SR2DLT_Ab
AB01974186	01	Ainno_16251	Ainnocence	AIN1-15_AINNL0015	Lot# MB15NO4115	TC00820835	H010	3.426	ng/ml	2625	-0.06							20220127_SR2DLT_Ab
AB01974186	01	Ainno_16251	Ainnocence	AIN1-15_AINNL0015	Lot# MB15NO4115	TC00820834	H010	3.426	ng/ml	1875	-0.96							20220127_SR2DLT_Ab
AB01974186	01	Ainno_16251	Ainnocence	AIN1-15_AINNL0015	Lot# MB15NO4115	TC00820835	H011	1.084	ng/ml	4025	1.87							20220127_SR2DLT_Ab
AB01974186	01	Ainno_16251	Ainnocence	AIN1-15_AINNL0015	Lot# MB15NO4115	TC00820834	H011	1.084	ng/ml	2850	0.38							20220127_SR2DLT_Ab
AB01974186	01	Ainno_16251	Ainnocence	AIN1-15_AINNL0015	Lot# MB15NO4115	TC00820835	H012	0.3431	ng/ml	2975	0.42							20220127_SR2DLT_Ab
AB01974186	01	Ainno_16251	Ainnocence	AIN1-15_AINNL0015	Lot# MB15NO4115	TC00820834	H012	0.3431	ng/ml	4400	2.52							20220127_SR2DLT_Ab
AB01974186	01	Ainno_16251	Ainnocence	AIN1-15_AINNL0015	Lot# MB15NO4115	TC00820835	H013	0.1086	ng/ml	2925	0.35							20220127_SR2DLT_Ab
AB01974186	01	Ainno_16251	Ainnocence	AIN1-15_AINNL0015	Lot# MB15NO4115	TC00820834	H013	0.1086	ng/ml	3400	1.14							20220127_SR2DLT_Ab
AB01974186	01	Ainno_16251	Ainnocence	AIN1-15_AINNL0015	Lot# MB15NO4115	TC00820835	H014	0.03436	ng/ml	2975	0.42							20220127_SR2DLT_Ab
AB01974186	01	Ainno_16251	Ainnocence	AIN1-15_AINNL0015	Lot# MB15NO4115	TC00820834	H014	0.03436	ng/ml	3650	1.48							20220127_SR2DLT_Ab
AB01974186	01	Ainno_16251	Ainnocence	AIN1-15_AINNL0015	Lot# MB15NO4115	TC00820835	H015	0.01087	ng/ml	3000	0.46							20220127_SR2DLT_Ab
AB01974186	01	Ainno_16251	Ainnocence	AIN1-15_AINNL0015	Lot# MB15NO4115	TC00820834	H015	0.01087	ng/ml	3275	0.97							20220127_SR2DLT_Ab
AB01974186	01	Ainno_16251	Ainnocence	AIN1-15_AINNL0015	Lot# MB15NO4115	TC00820835	H016	0.003441	ng/ml	2875	0.28							20220127_SR2DLT_Ab
AB01974186	01	Ainno_16251	Ainnocence	AIN1-15_AINNL0015	Lot# MB15NO4115	TC00820834	H016	0.003441	ng/ml	1400	-1.61							20220127_SR2DLT_Ab
AB01974186	01	Ainno_16251	Ainnocence	AIN1-15_AINNL0015	Lot# MB15NO4115	TC00820835	H017	0.001089	ng/ml	2600	-0.09							20220127_SR2DLT_Ab
AB01974186	01	Ainno_16251	Ainnocence	AIN1-15_AINNL0015	Lot# MB15NO4115	TC00820834	H017	0.001089	ng/ml	2325	-0.34							20220127_SR2DLT_Ab
AB01974186	01	Ainno_16251	Ainnocence	AIN1-15_AINNL0015	Lot# MB15NO4115	TC00820835	H018	0.0003446	ng/ml	3475	1.11							20220127_SR2DLT_Ab
AB01974186	01	Ainno_16251	Ainnocence	AIN1-15_AINNL0015	Lot# MB15NO4115	TC00820834	H018	0.0003446	ng/ml	2550	-0.03							20220127_SR2DLT_Ab
AB01974186	01	Ainno_16251	Ainnocence	AIN1-15_AINNL0015	Lot# MB15NO4115	TC00820835	H019	0.000109	ng/ml	2150	-0.71							20220127_SR2DLT_Ab
AB01974186	01	Ainno_16251	Ainnocence	AIN1-15_AINNL0015	Lot# MB15NO4115	TC00820834	H019	0.000109	ng/ml	2475	-0.13							20220127_SR2DLT_Ab
AB01974186	01	Ainno_16251	Ainnocence	AIN1-15_AINNL0015	Lot# MB15NO4115	TC00820835	H020	3.451e-05	ng/ml	4175	2.08							20220127_SR2DLT_Ab
AB01974186	01	Ainno_16251	Ainnocence	AIN1-15_AINNL0015	Lot# MB15NO4115	TC00820834	H020	3.451e-05	ng/ml	3500	1.28							20220127_SR2DLT_Ab
AB01974186	01	Ainno_16251	Ainnocence	AIN1-15_AINNL0015	Lot# MB15NO4115	TC00820835	H021	1.092e-05	ng/ml	2800	0.18							20220127_SR2DLT_Ab
AB01974186	01	Ainno_16251	Ainnocence	AIN1-15_AINNL0015	Lot# MB15NO4115	TC00820834	H021	1.092e-05	ng/ml	2850	0.38							20220127_SR2DLT_Ab
AB01974186	01	Ainno_16251	Ainnocence	AIN1-15_AINNL0015	Lot# MB15NO4115	TC00820835	H022	3.456e-06	ng/ml	2875	0.28							20220127_SR2DLT_Ab
AB01974186	01	Ainno_16251	Ainnocence	AIN1-15_AINNL0015	Lot# MB15NO4115	TC00820834	H022	3.456e-06	ng/ml	3875	1.79							20220127_SR2DLT_Ab
AB01974187	01	Ainno_16251	Ainnocence	AIN1-38_AINNL0038	Lot# MB15NO4138	TC00820835	I003	10890	ng/ml	80475	107.23	199.241	Active	2.92	13.1	33.7	40	20220127_SR2DLT_Ab
AB01974187	01	Ainno_16251	Ainnocence	AIN1-38_AINNL0038	Lot# MB15NO4138	TC00820834	I003	10890	ng/ml	72800	96.65							20220127_SR2DLT_Ab
AB01974187	01	Ainno_16251	Ainnocence	AIN1-38_AINNL0038	Lot# MB15NO4138	TC00820835	I004	3446	ng/ml	84275	112.47							20220127_SR2DLT_Ab
AB01974187	01	Ainno_16251	Ainnocence	AIN1-38_AINNL0038	Lot# MB15NO4138	TC00820834	I004	3446	ng/ml	78825	104.94							20220127_SR2DLT_Ab
AB01974187	01	Ainno_16251	Ainnocence	AIN1-38_AINNL0038	Lot# MB15NO4138	TC00820835	I005	1091	ng/ml	101275	135.9							20220127_SR2DLT_Ab
AB01974187	01	Ainno_16251	Ainnocence	AIN1-38_AINNL0038	Lot# MB15NO4138	TC00820834	I005	1091	ng/ml	119225	160.54							20220127_SR2DLT_Ab
AB01974187	01	Ainno_16251	Ainnocence	AIN1-38_AINNL0038	Lot# MB15NO4138	TC00820835	I006	345.1	ng/ml	75875	100.89							20220127_SR2DLT_Ab
AB01974187	01	Ainno_16251	Ainnocence	AIN1-38_AINNL0038	Lot# MB15NO4138	TC00820834	I006	345.1	ng/ml	43500	56.33							20220127_SR2DLT_Ab
AB01974187	01	Ainno_16251	Ainnocence	AIN1-38_AINNL0038	Lot# MB15NO4138	TC00820835	I007	109.2	ng/ml	20425	24.47							20220127_SR2DLT_Ab
AB01974187	01	Ainno_16251	Ainnocence	AIN1-38_AINNL0038	Lot# MB15NO4138	TC00820834	I007	109.2	ng/ml	9725	9.84							20220127_SR2DLT_Ab
AB01974187	01	Ainno_16251	Ainnocence	AIN1-38_AINNL0038	Lot# MB15NO4138	TC00820835	I008	34.56	ng/ml	4750	2.87							20220127_SR2DLT_Ab
AB01974187	01	Ainno_16251	Ainnocence	AIN1-38_AINNL0038	Lot# MB15NO4138	TC00820834	I008	34.56	ng/ml	4525	2.69							20220127_SR2DLT_Ab
AB01974187	01	Ainno_16251	Ainnocence	AIN1-38_AINNL0038	Lot# MB15NO4138	TC00820835	I009	10.94	ng/ml	4925	3.11							20220127_SR2DLT_Ab
AB01974187	01	Ainno_16251	Ainnocence	AIN1-38_AINNL0038	Lot# MB15NO4138	TC00820834	I009	10.94	ng/ml	3175	0.83							20220127_SR2DLT_Ab
AB01974187	01	Ainno_16251	Ainnocence	AIN1-38_AINNL0038	Lot# MB15NO4138	TC00820835	I010	3.461	ng/ml	3400	1.01							20220127_SR2DLT_Ab
AB01974187	01	Ainno_16251	Ainnocence	AIN1-38_AINNL0038	Lot# MB15NO4138	TC00820834	I010	3.461	ng/ml	3425	1.17							20220127_SR2DLT_Ab
AB01974187	01	Ainno_16251	Ainnocence	AIN1-38_AINNL0038	Lot# MB15NO4138	TC00820835	I011	1.095	ng/ml	3050	0.53							20220127_SR2DLT_Ab
AB01974187	01	Ainno_16251	Ainnocence	AIN1-38_AINNL0038	Lot# MB15NO4138	TC00820834	I011	1.095	ng/ml	3025	0.62							20220127_SR2DLT_Ab
AB01974187	01	Ainno_16251	Ainnocence	AIN1-38_AINNL0038	Lot# MB15NO4138	TC00820835	I012	0.3466	ng/ml	3525	1.18							20220127_SR2DLT_Ab
AB01974187	01	Ainno_16251	Ainnocence	AIN1-38_AINNL0038	Lot# MB15NO4138	TC00820834	I012	0.3466	ng/ml	2475	-0.13							20220127_SR2DLT_Ab
AB01974187	01	Ainno_16251	Ainnocence	AIN1-38_AINNL0038	Lot# MB15NO4138	TC00820835	I013	0.1097	ng/ml	3125	0.63							20220127_SR2DLT_Ab
AB01974187	01	Ainno_16251	Ainnocence	AIN1-38_AINNL0038	Lot# MB15NO4138	TC00820834	I013	0.1097	ng/ml	2050	-0.72							20220127_SR2DLT_Ab
AB01974187	01	Ainno_16251	Ainnocence	AIN1-38_AINNL0038	Lot# MB15NO4138	TC00820835	I014	0.03471	ng/ml	2675	0.01							20220127_SR2DLT_Ab
AB01974187	01	Ainno_16251	Ainnocence	AIN1-38_AINNL0038	Lot# MB15NO4138	TC00820834	I014	0.03471	ng/ml	3325	1.04							20220127_SR2DLT_Ab
AB01974187	01	Ainno_16251	Ainnocence	AIN1-38_AINNL0038	Lot# MB15NO4138	TC00820835	I015	0.01098	ng/ml	3000	0.46							20220127_SR2DLT_Ab
AB01974187	01	Ainno_16251	Ainnocence	AIN1-38_AINNL0038	Lot# MB15NO4138	TC00820834	I015	0.01098	ng/ml	2450	-0.17							20220127_SR2DLT_Ab
AB01974187	01	Ainno_16251	Ainnocence	AIN1-38_AINNL0038	Lot# MB15NO4138	TC00820835	I016	0.003476	ng/ml	2775	0.15							20220127_SR2DLT_Ab
AB01974187	01	Ainno_16251	Ainnocence	AIN1-38_AINNL0038	Lot# MB15NO4138	TC00820834	I016	0.003476	ng/ml	2400	-0.24							20220127_SR2DLT_Ab
AB01974187	01	Ainno_16251	Ainnocence	AIN1-38_AINNL0038	Lot# MB15NO4138	TC00820835	I017	0.0011	ng/ml	2525	-0.2							20220127_SR2DLT_Ab
AB01974187	01	Ainno_16251	Ainnocence	AIN1-38_AINNL0038	Lot# MB15NO4138	TC00820834	I017	0.0011	ng/ml	3325	1.04							20220127_SR2DLT_Ab
AB01974187	01	Ainno_16251	Ainnocence	AIN1-38_AINNL0038	Lot# MB15NO4138	TC00820835	I018	0.0003481	ng/ml	2875	0.28							20220127_SR2DLT_Ab
AB01974187	01	Ainno_16251	Ainnocence	AIN1-38_AINNL0038	Lot# MB15NO4138	TC00820834	I018	0.0003481	ng/ml	2425	-0.2							20220127_SR2DLT_Ab
AB01974187	01	Ainno_16251	Ainnocence	AIN1-38_AINNL0038	Lot# MB15NO4138	TC00820835	I019	0.0001102	ng/ml	3725	1.46							20220127_SR2DLT_Ab
AB01974187	01	Ainno_16251	Ainnocence	AIN1-38_AINNL0038	Lot# MB15NO4138	TC00820834	I019	0.0001102	ng/ml	2475	-0.13							20220127_SR2DLT_Ab
AB01974187	01	Ainno_16251	Ainnocence	AIN1-38_AINNL0038	Lot# MB15NO4138	TC00820835	I020	3.486e-05	ng/ml	3125	0.63							20220127_SR2DLT_Ab
AB01974187	01	Ainno_16251	Ainnocence	AIN1-38_AINNL0038	Lot# MB15NO4138	TC00820834	I020	3.486e-05	ng/ml	2500	-0.1							20220127_SR2DLT_Ab
AB01974187	01	Ainno_16251	Ainnocence	AIN1-38_AINNL0038	Lot# MB15NO4138	TC00820835	I021	1.103e-05	ng/ml	3100	0.59							20220127_SR2DLT_Ab
AB01974187	01	Ainno_16251	Ainnocence	AIN1-38_AINNL0038	Lot# MB15NO4138	TC00820834	I021	1.103e-05	ng/ml	3325	1.04							20220127_SR2DLT_Ab
AB01974187	01	Ainno_16251	Ainnocence	AIN1-38_AINNL0038	Lot# MB15NO4138	TC00820835	I022	3.491e-06	ng/ml	3500	1.15							20220127_SR2DLT_Ab
AB01974187	01	Ainno_16251	Ainnocence	AIN1-38_AINNL0038	Lot# MB15NO4138	TC00820834	I022	3.491e-06	ng/ml	3100	0.73							20220127_SR2DLT_Ab
AB01974188	01	Ainno_16251	Ainnocence	AIN1-39_AINNL0039	Lot# MB15NO4139	TC00820835	J003	10670	ng/ml	2725	0.08	>10670	Inactive	-0.41	1.47	0	40	20220127_SR2DLT_Ab
AB01974188	01	Ainno_16251	Ainnocence	AIN1-39_AINNL0039	Lot# MB15NO4139	TC00820834	J003	10670	ng/ml	7675	7.02							20220127_SR2DLT_Ab
AB01974188	01	Ainno_16251	Ainnocence	AIN1-39_AINNL0039	Lot# MB15NO4139	TC00820835	J004	3377	ng/ml	2800	0.18							20220127_SR2DLT_Ab
AB01974188	01	Ainno_16251	Ainnocence	AIN1-39_AINNL0039	Lot# MB15NO4139	TC00820834	J004	3377	ng/ml	1625	-1.3							20220127_SR2DLT_Ab
AB01974188	01	Ainno_16251	Ainnocence	AIN1-39_AINNL0039	Lot# MB15NO4139	TC00820835	J005	1069	ng/ml	2775	0.15							20220127_SR2DLT_Ab
AB01974188	01	Ainno_16251	Ainnocence	AIN1-39_AINNL0039	Lot# MB15NO4139	TC00820834	J005	1069	ng/ml	1800	-1.06							20220127_SR2DLT_Ab
AB01974188	01	Ainno_16251	Ainnocence	AIN1-39_AINNL0039	Lot# MB15NO4139	TC00820835	J006	338.1	ng/ml	2525	-0.2							20220127_SR2DLT_Ab
AB01974188	01	Ainno_16251	Ainnocence	AIN1-39_AINNL0039	Lot# MB15NO4139	TC00820834	J006	338.1	ng/ml	2925	0.49							20220127_SR2DLT_Ab
AB01974188	01	Ainno_16251	Ainnocence	AIN1-39_AINNL0039	Lot# MB15NO4139	TC00820835	J007	107	ng/ml	2600	-0.09							20220127_SR2DLT_Ab
AB01974188	01	Ainno_16251	Ainnocence	AIN1-39_AINNL0039	Lot# MB15NO4139	TC00820834	J007	107	ng/ml	2375	-0.27							20220127_SR2DLT_Ab
AB01974188	01	Ainno_16251	Ainnocence	AIN1-39_AINNL0039	Lot# MB15NO4139	TC00820835	J008	33.86	ng/ml	3350	0.94							20220127_SR2DLT_Ab
AB01974188	01	Ainno_16251	Ainnocence	AIN1-39_AINNL0039	Lot# MB15NO4139	TC00820834	J008	33.86	ng/ml	3125	0.76							20220127_SR2DLT_Ab
AB01974188	01	Ainno_16251	Ainnocence	AIN1-39_AINNL0039	Lot# MB15NO4139	TC00820835	J009	10.72	ng/ml	2025	-0.89							20220127_SR2DLT_Ab
AB01974188	01	Ainno_16251	Ainnocence	AIN1-39_AINNL0039	Lot# MB15NO4139	TC00820834	J009	10.72	ng/ml	1675	-1.23							20220127_SR2DLT_Ab
AB01974188	01	Ainno_16251	Ainnocence	AIN1-39_AINNL0039	Lot# MB15NO4139	TC00820835	J010	3.391	ng/ml	2550	-0.16							20220127_SR2DLT_Ab
AB01974188	01	Ainno_16251	Ainnocence	AIN1-39_AINNL0039	Lot# MB15NO4139	TC00820834	J010	3.391	ng/ml	2500	-0.1							20220127_SR2DLT_Ab
AB01974188	01	Ainno_16251	Ainnocence	AIN1-39_AINNL0039	Lot# MB15NO4139	TC00820835	J011	1.073	ng/ml	2600	-0.09							20220127_SR2DLT_Ab
AB01974188	01	Ainno_16251	Ainnocence	AIN1-39_AINNL0039	Lot# MB15NO4139	TC00820834	J011	1.073	ng/ml	1950	-0.86							20220127_SR2DLT_Ab
AB01974188	01	Ainno_16251	Ainnocence	AIN1-39_AINNL0039	Lot# MB15NO4139	TC00820835	J012	0.3396	ng/ml	2500	-0.23							20220127_SR2DLT_Ab
AB01974188	01	Ainno_16251	Ainnocence	AIN1-39_AINNL0039	Lot# MB15NO4139	TC00820834	J012	0.3396	ng/ml	2925	0.49							20220127_SR2DLT_Ab
AB01974188	01	Ainno_16251	Ainnocence	AIN1-39_AINNL0039	Lot# MB15NO4139	TC00820835	J013	0.1075	ng/ml	3950	1.77							20220127_SR2DLT_Ab
AB01974188	01	Ainno_16251	Ainnocence	AIN1-39_AINNL0039	Lot# MB15NO4139	TC00820834	J013	0.1075	ng/ml	3450	1.21							20220127_SR2DLT_Ab
AB01974188	01	Ainno_16251	Ainnocence	AIN1-39_AINNL0039	Lot# MB15NO4139	TC00820835	J014	0.03401	ng/ml	3250	0.8							20220127_SR2DLT_Ab
AB01974188	01	Ainno_16251	Ainnocence	AIN1-39_AINNL0039	Lot# MB15NO4139	TC00820834	J014	0.03401	ng/ml	3200	0.86							20220127_SR2DLT_Ab
AB01974188	01	Ainno_16251	Ainnocence	AIN1-39_AINNL0039	Lot# MB15NO4139	TC00820835	J015	0.01076	ng/ml	3750	1.49							20220127_SR2DLT_Ab
AB01974188	01	Ainno_16251	Ainnocence	AIN1-39_AINNL0039	Lot# MB15NO4139	TC00820834	J015	0.01076	ng/ml	3200	0.86							20220127_SR2DLT_Ab
AB01974188	01	Ainno_16251	Ainnocence	AIN1-39_AINNL0039	Lot# MB15NO4139	TC00820835	J016	0.003406	ng/ml	3125	0.63							20220127_SR2DLT_Ab
AB01974188	01	Ainno_16251	Ainnocence	AIN1-39_AINNL0039	Lot# MB15NO4139	TC00820834	J016	0.003406	ng/ml	2275	-0.41							20220127_SR2DLT_Ab
AB01974188	01	Ainno_16251	Ainnocence	AIN1-39_AINNL0039	Lot# MB15NO4139	TC00820835	J017	0.001078	ng/ml	2875	0.28							20220127_SR2DLT_Ab
AB01974188	01	Ainno_16251	Ainnocence	AIN1-39_AINNL0039	Lot# MB15NO4139	TC00820834	J017	0.001078	ng/ml	2950	0.52							20220127_SR2DLT_Ab
AB01974188	01	Ainno_16251	Ainnocence	AIN1-39_AINNL0039	Lot# MB15NO4139	TC00820835	J018	0.0003411	ng/ml	3550	1.21							20220127_SR2DLT_Ab
AB01974188	01	Ainno_16251	Ainnocence	AIN1-39_AINNL0039	Lot# MB15NO4139	TC00820834	J018	0.0003411	ng/ml	2525	-0.06							20220127_SR2DLT_Ab
AB01974188	01	Ainno_16251	Ainnocence	AIN1-39_AINNL0039	Lot# MB15NO4139	TC00820835	J019	0.0001079	ng/ml	3025	0.49							20220127_SR2DLT_Ab
AB01974188	01	Ainno_16251	Ainnocence	AIN1-39_AINNL0039	Lot# MB15NO4139	TC00820834	J019	0.0001079	ng/ml	3675	1.52							20220127_SR2DLT_Ab
AB01974188	01	Ainno_16251	Ainnocence	AIN1-39_AINNL0039	Lot# MB15NO4139	TC00820835	J020	3.416e-05	ng/ml	2600	-0.09							20220127_SR2DLT_Ab
AB01974188	01	Ainno_16251	Ainnocence	AIN1-39_AINNL0039	Lot# MB15NO4139	TC00820834	J020	3.416e-05	ng/ml	4175	2.21							20220127_SR2DLT_Ab
AB01974188	01	Ainno_16251	Ainnocence	AIN1-39_AINNL0039	Lot# MB15NO4139	TC00820835	J021	1.081e-05	ng/ml	3300	0.87							20220127_SR2DLT_Ab
AB01974188	01	Ainno_16251	Ainnocence	AIN1-39_AINNL0039	Lot# MB15NO4139	TC00820834	J021	1.081e-05	ng/ml	3475	1.24							20220127_SR2DLT_Ab
AB01974188	01	Ainno_16251	Ainnocence	AIN1-39_AINNL0039	Lot# MB15NO4139	TC00820835	J022	3.421e-06	ng/ml	3400	1.01							20220127_SR2DLT_Ab
AB01974188	01	Ainno_16251	Ainnocence	AIN1-39_AINNL0039	Lot# MB15NO4139	TC00820834	J022	3.421e-06	ng/ml	3800	1.69							20220127_SR2DLT_Ab
AB01974189	01	Ainno_16251	Ainnocence	AIN1-40_AINNL0040	Lot# MB15NO4140	TC00820835	K003	10780	ng/ml	97825	131.15	1142.85	Active	11.53	10.03	>9999	40	20220127_SR2DLT_Ab
AB01974189	01	Ainno_16251	Ainnocence	AIN1-40_AINNL0040	Lot# MB15NO4140	TC00820834	K003	10780	ng/ml	75275	100.06							20220127_SR2DLT_Ab
AB01974189	01	Ainno_16251	Ainnocence	AIN1-40_AINNL0040	Lot# MB15NO4140	TC00820835	K004	3411	ng/ml	103300	138.69							20220127_SR2DLT_Ab
AB01974189	01	Ainno_16251	Ainnocence	AIN1-40_AINNL0040	Lot# MB15NO4140	TC00820834	K004	3411	ng/ml	95875	128.41							20220127_SR2DLT_Ab
AB01974189	01	Ainno_16251	Ainnocence	AIN1-40_AINNL0040	Lot# MB15NO4140	TC00820835	K005	1080	ng/ml	28825	36.05							20220127_SR2DLT_Ab
AB01974189	01	Ainno_16251	Ainnocence	AIN1-40_AINNL0040	Lot# MB15NO4140	TC00820834	K005	1080	ng/ml	25725	31.86							20220127_SR2DLT_Ab
AB01974189	01	Ainno_16251	Ainnocence	AIN1-40_AINNL0040	Lot# MB15NO4140	TC00820835	K006	341.6	ng/ml	14250	15.96							20220127_SR2DLT_Ab
AB01974189	01	Ainno_16251	Ainnocence	AIN1-40_AINNL0040	Lot# MB15NO4140	TC00820834	K006	341.6	ng/ml	9125	9.02							20220127_SR2DLT_Ab
AB01974189	01	Ainno_16251	Ainnocence	AIN1-40_AINNL0040	Lot# MB15NO4140	TC00820835	K007	108.1	ng/ml	10400	10.66							20220127_SR2DLT_Ab
AB01974189	01	Ainno_16251	Ainnocence	AIN1-40_AINNL0040	Lot# MB15NO4140	TC00820834	K007	108.1	ng/ml	7375	6.61							20220127_SR2DLT_Ab
AB01974189	01	Ainno_16251	Ainnocence	AIN1-40_AINNL0040	Lot# MB15NO4140	TC00820835	K008	34.21	ng/ml	4450	2.45							20220127_SR2DLT_Ab
AB01974189	01	Ainno_16251	Ainnocence	AIN1-40_AINNL0040	Lot# MB15NO4140	TC00820834	K008	34.21	ng/ml	3950	1.9							20220127_SR2DLT_Ab
AB01974189	01	Ainno_16251	Ainnocence	AIN1-40_AINNL0040	Lot# MB15NO4140	TC00820835	K009	10.83	ng/ml	4350	2.32							20220127_SR2DLT_Ab
AB01974189	01	Ainno_16251	Ainnocence	AIN1-40_AINNL0040	Lot# MB15NO4140	TC00820834	K009	10.83	ng/ml	2325	-0.34							20220127_SR2DLT_Ab
AB01974189	01	Ainno_16251	Ainnocence	AIN1-40_AINNL0040	Lot# MB15NO4140	TC00820835	K010	3.426	ng/ml	4500	2.52							20220127_SR2DLT_Ab
AB01974189	01	Ainno_16251	Ainnocence	AIN1-40_AINNL0040	Lot# MB15NO4140	TC00820834	K010	3.426	ng/ml	3775	1.66							20220127_SR2DLT_Ab
AB01974189	01	Ainno_16251	Ainnocence	AIN1-40_AINNL0040	Lot# MB15NO4140	TC00820835	K011	1.084	ng/ml	3475	1.11							20220127_SR2DLT_Ab
AB01974189	01	Ainno_16251	Ainnocence	AIN1-40_AINNL0040	Lot# MB15NO4140	TC00820834	K011	1.084	ng/ml	3275	0.97							20220127_SR2DLT_Ab
AB01974189	01	Ainno_16251	Ainnocence	AIN1-40_AINNL0040	Lot# MB15NO4140	TC00820835	K012	0.3431	ng/ml	3925	1.73							20220127_SR2DLT_Ab
AB01974189	01	Ainno_16251	Ainnocence	AIN1-40_AINNL0040	Lot# MB15NO4140	TC00820834	K012	0.3431	ng/ml	3050	0.66							20220127_SR2DLT_Ab
AB01974189	01	Ainno_16251	Ainnocence	AIN1-40_AINNL0040	Lot# MB15NO4140	TC00820835	K013	0.1086	ng/ml	3375	0.97							20220127_SR2DLT_Ab
AB01974189	01	Ainno_16251	Ainnocence	AIN1-40_AINNL0040	Lot# MB15NO4140	TC00820834	K013	0.1086	ng/ml	2075	-0.68							20220127_SR2DLT_Ab
AB01974189	01	Ainno_16251	Ainnocence	AIN1-40_AINNL0040	Lot# MB15NO4140	TC00820835	K014	0.03436	ng/ml	3650	1.35							20220127_SR2DLT_Ab
AB01974189	01	Ainno_16251	Ainnocence	AIN1-40_AINNL0040	Lot# MB15NO4140	TC00820834	K014	0.03436	ng/ml	2675	0.14							20220127_SR2DLT_Ab
AB01974189	01	Ainno_16251	Ainnocence	AIN1-40_AINNL0040	Lot# MB15NO4140	TC00820835	K015	0.01087	ng/ml	3225	0.77							20220127_SR2DLT_Ab
AB01974189	01	Ainno_16251	Ainnocence	AIN1-40_AINNL0040	Lot# MB15NO4140	TC00820834	K015	0.01087	ng/ml	2000	-0.79							20220127_SR2DLT_Ab
AB01974189	01	Ainno_16251	Ainnocence	AIN1-40_AINNL0040	Lot# MB15NO4140	TC00820835	K016	0.003441	ng/ml	3825	1.59							20220127_SR2DLT_Ab
AB01974189	01	Ainno_16251	Ainnocence	AIN1-40_AINNL0040	Lot# MB15NO4140	TC00820834	K016	0.003441	ng/ml	2275	-0.41							20220127_SR2DLT_Ab
AB01974189	01	Ainno_16251	Ainnocence	AIN1-40_AINNL0040	Lot# MB15NO4140	TC00820835	K017	0.001089	ng/ml	2900	0.32							20220127_SR2DLT_Ab
AB01974189	01	Ainno_16251	Ainnocence	AIN1-40_AINNL0040	Lot# MB15NO4140	TC00820834	K017	0.001089	ng/ml	3050	0.66							20220127_SR2DLT_Ab
AB01974189	01	Ainno_16251	Ainnocence	AIN1-40_AINNL0040	Lot# MB15NO4140	TC00820835	K018	0.0003446	ng/ml	3125	0.63							20220127_SR2DLT_Ab
AB01974189	01	Ainno_16251	Ainnocence	AIN1-40_AINNL0040	Lot# MB15NO4140	TC00820834	K018	0.0003446	ng/ml	2150	-0.58							20220127_SR2DLT_Ab
AB01974189	01	Ainno_16251	Ainnocence	AIN1-40_AINNL0040	Lot# MB15NO4140	TC00820835	K019	0.000109	ng/ml	3175	0.7							20220127_SR2DLT_Ab
AB01974189	01	Ainno_16251	Ainnocence	AIN1-40_AINNL0040	Lot# MB15NO4140	TC00820834	K019	0.000109	ng/ml	2800	0.31							20220127_SR2DLT_Ab
AB01974189	01	Ainno_16251	Ainnocence	AIN1-40_AINNL0040	Lot# MB15NO4140	TC00820835	K020	3.451e-05	ng/ml	3525	1.18							20220127_SR2DLT_Ab
AB01974189	01	Ainno_16251	Ainnocence	AIN1-40_AINNL0040	Lot# MB15NO4140	TC00820834	K020	3.451e-05	ng/ml	3375	1.11							20220127_SR2DLT_Ab
AB01974189	01	Ainno_16251	Ainnocence	AIN1-40_AINNL0040	Lot# MB15NO4140	TC00820835	K021	1.092e-05	ng/ml	3625	1.32							20220127_SR2DLT_Ab
AB01974189	01	Ainno_16251	Ainnocence	AIN1-40_AINNL0040	Lot# MB15NO4140	TC00820834	K021	1.092e-05	ng/ml	1800	-1.06							20220127_SR2DLT_Ab
AB01974189	01	Ainno_16251	Ainnocence	AIN1-40_AINNL0040	Lot# MB15NO4140	TC00820835	K022	3.456e-06	ng/ml	2475	-0.27							20220127_SR2DLT_Ab
AB01974189	01	Ainno_16251	Ainnocence	AIN1-40_AINNL0040	Lot# MB15NO4140	TC00820834	K022	3.456e-06	ng/ml	2450	-0.17							20220127_SR2DLT_Ab
AB01974190	01	Ainno_16251	Ainnocence	AIN1-41_AINNL0041	Lot# MB15NO4141	TC00820835	L003	10890	ng/ml	8425	7.93	>10890	Inactive	1	3.41		40	20220127_SR2DLT_Ab
AB01974190	01	Ainno_16251	Ainnocence	AIN1-41_AINNL0041	Lot# MB15NO4141	TC00820834	L003	10890	ng/ml	4900	3.2							20220127_SR2DLT_Ab
AB01974190	01	Ainno_16251	Ainnocence	AIN1-41_AINNL0041	Lot# MB15NO4141	TC00820835	L004	3446	ng/ml	3825	1.59							20220127_SR2DLT_Ab
AB01974190	01	Ainno_16251	Ainnocence	AIN1-41_AINNL0041	Lot# MB15NO4141	TC00820834	L004	3446	ng/ml	2650	0.11							20220127_SR2DLT_Ab
AB01974190	01	Ainno_16251	Ainnocence	AIN1-41_AINNL0041	Lot# MB15NO4141	TC00820835	L005	1091	ng/ml	3550	1.21							20220127_SR2DLT_Ab
AB01974190	01	Ainno_16251	Ainnocence	AIN1-41_AINNL0041	Lot# MB15NO4141	TC00820834	L005	1091	ng/ml	1375	-1.65							20220127_SR2DLT_Ab
AB01974190	01	Ainno_16251	Ainnocence	AIN1-41_AINNL0041	Lot# MB15NO4141	TC00820835	L006	345.1	ng/ml	2875	0.28							20220127_SR2DLT_Ab
AB01974190	01	Ainno_16251	Ainnocence	AIN1-41_AINNL0041	Lot# MB15NO4141	TC00820834	L006	345.1	ng/ml	2325	-0.34							20220127_SR2DLT_Ab
AB01974190	01	Ainno_16251	Ainnocence	AIN1-41_AINNL0041	Lot# MB15NO4141	TC00820835	L007	109.2	ng/ml	3075	0.56							20220127_SR2DLT_Ab
AB01974190	01	Ainno_16251	Ainnocence	AIN1-41_AINNL0041	Lot# MB15NO4141	TC00820834	L007	109.2	ng/ml	2975	0.55							20220127_SR2DLT_Ab
AB01974190	01	Ainno_16251	Ainnocence	AIN1-41_AINNL0041	Lot# MB15NO4141	TC00820835	L008	34.56	ng/ml	3575	1.25							20220127_SR2DLT_Ab
AB01974190	01	Ainno_16251	Ainnocence	AIN1-41_AINNL0041	Lot# MB15NO4141	TC00820834	L008	34.56	ng/ml	2225	-0.48							20220127_SR2DLT_Ab
AB01974190	01	Ainno_16251	Ainnocence	AIN1-41_AINNL0041	Lot# MB15NO4141	TC00820835	L009	10.94	ng/ml	3150	0.66							20220127_SR2DLT_Ab
AB01974190	01	Ainno_16251	Ainnocence	AIN1-41_AINNL0041	Lot# MB15NO4141	TC00820834	L009	10.94	ng/ml	1575	-1.37							20220127_SR2DLT_Ab
AB01974190	01	Ainno_16251	Ainnocence	AIN1-41_AINNL0041	Lot# MB15NO4141	TC00820835	L010	3.461	ng/ml	3150	0.66							20220127_SR2DLT_Ab
AB01974190	01	Ainno_16251	Ainnocence	AIN1-41_AINNL0041	Lot# MB15NO4141	TC00820834	L010	3.461	ng/ml	2375	-0.27							20220127_SR2DLT_Ab
AB01974190	01	Ainno_16251	Ainnocence	AIN1-41_AINNL0041	Lot# MB15NO4141	TC00820835	L011	1.095	ng/ml	2475	-0.27							20220127_SR2DLT_Ab
AB01974190	01	Ainno_16251	Ainnocence	AIN1-41_AINNL0041	Lot# MB15NO4141	TC00820834	L011	1.095	ng/ml	3750	1.62							20220127_SR2DLT_Ab
AB01974190	01	Ainno_16251	Ainnocence	AIN1-41_AINNL0041	Lot# MB15NO4141	TC00820835	L012	0.3466	ng/ml	2075	-0.82							20220127_SR2DLT_Ab
AB01974190	01	Ainno_16251	Ainnocence	AIN1-41_AINNL0041	Lot# MB15NO4141	TC00820834	L012	0.3466	ng/ml	2250	-0.44							20220127_SR2DLT_Ab
AB01974190	01	Ainno_16251	Ainnocence	AIN1-41_AINNL0041	Lot# MB15NO4141	TC00820835	L013	0.1097	ng/ml	3750	1.49							20220127_SR2DLT_Ab
AB01974190	01	Ainno_16251	Ainnocence	AIN1-41_AINNL0041	Lot# MB15NO4141	TC00820834	L013	0.1097	ng/ml	4250	2.31							20220127_SR2DLT_Ab
AB01974190	01	Ainno_16251	Ainnocence	AIN1-41_AINNL0041	Lot# MB15NO4141	TC00820835	L014	0.03471	ng/ml	15750	18.03							20220127_SR2DLT_Ab
AB01974190	01	Ainno_16251	Ainnocence	AIN1-41_AINNL0041	Lot# MB15NO4141	TC00820834	L014	0.03471	ng/ml	3350	1.07							20220127_SR2DLT_Ab
AB01974190	01	Ainno_16251	Ainnocence	AIN1-41_AINNL0041	Lot# MB15NO4141	TC00820835	L015	0.01098	ng/ml	4825	2.97							20220127_SR2DLT_Ab
AB01974190	01	Ainno_16251	Ainnocence	AIN1-41_AINNL0041	Lot# MB15NO4141	TC00820834	L015	0.01098	ng/ml	3600	1.41							20220127_SR2DLT_Ab
AB01974190	01	Ainno_16251	Ainnocence	AIN1-41_AINNL0041	Lot# MB15NO4141	TC00820835	L016	0.003476	ng/ml	3275	0.84							20220127_SR2DLT_Ab
AB01974190	01	Ainno_16251	Ainnocence	AIN1-41_AINNL0041	Lot# MB15NO4141	TC00820834	L016	0.003476	ng/ml	2425	-0.2							20220127_SR2DLT_Ab
AB01974190	01	Ainno_16251	Ainnocence	AIN1-41_AINNL0041	Lot# MB15NO4141	TC00820835	L017	0.0011	ng/ml	2950	0.39							20220127_SR2DLT_Ab
AB01974190	01	Ainno_16251	Ainnocence	AIN1-41_AINNL0041	Lot# MB15NO4141	TC00820834	L017	0.0011	ng/ml	4175	2.21							20220127_SR2DLT_Ab
AB01974190	01	Ainno_16251	Ainnocence	AIN1-41_AINNL0041	Lot# MB15NO4141	TC00820835	L018	0.0003481	ng/ml	2600	-0.09							20220127_SR2DLT_Ab
AB01974190	01	Ainno_16251	Ainnocence	AIN1-41_AINNL0041	Lot# MB15NO4141	TC00820834	L018	0.0003481	ng/ml	2875	0.42							20220127_SR2DLT_Ab
AB01974190	01	Ainno_16251	Ainnocence	AIN1-41_AINNL0041	Lot# MB15NO4141	TC00820835	L019	0.0001102	ng/ml	2275	-0.54							20220127_SR2DLT_Ab
AB01974190	01	Ainno_16251	Ainnocence	AIN1-41_AINNL0041	Lot# MB15NO4141	TC00820834	L019	0.0001102	ng/ml	3075	0.69							20220127_SR2DLT_Ab
AB01974190	01	Ainno_16251	Ainnocence	AIN1-41_AINNL0041	Lot# MB15NO4141	TC00820835	L020	3.486e-05	ng/ml	3250	0.8							20220127_SR2DLT_Ab
AB01974190	01	Ainno_16251	Ainnocence	AIN1-41_AINNL0041	Lot# MB15NO4141	TC00820834	L020	3.486e-05	ng/ml	2375	-0.27							20220127_SR2DLT_Ab
AB01974190	01	Ainno_16251	Ainnocence	AIN1-41_AINNL0041	Lot# MB15NO4141	TC00820835	L021	1.103e-05	ng/ml	2475	-0.27							20220127_SR2DLT_Ab
AB01974190	01	Ainno_16251	Ainnocence	AIN1-41_AINNL0041	Lot# MB15NO4141	TC00820834	L021	1.103e-05	ng/ml	2675	0.14							20220127_SR2DLT_Ab
AB01974190	01	Ainno_16251	Ainnocence	AIN1-41_AINNL0041	Lot# MB15NO4141	TC00820835	L022	3.491e-06	ng/ml	3575	1.25							20220127_SR2DLT_Ab
AB01974190	01	Ainno_16251	Ainnocence	AIN1-41_AINNL0041	Lot# MB15NO4141	TC00820834	L022	3.491e-06	ng/ml	2950	0.52							20220127_SR2DLT_Ab
AB01974191	01	Ainno_16251	Ainnocence	AIN1-42_AINNL0042	Lot# MB15NO4142	TC00820835	M003	10890	ng/ml	78675	104.75	36.134	Active	16.3	7.72	>9999	40	20220127_SR2DLT_Ab
AB01974191	01	Ainno_16251	Ainnocence	AIN1-42_AINNL0042	Lot# MB15NO4142	TC00820834	M003	10890	ng/ml	76525	101.78							20220127_SR2DLT_Ab
AB01974191	01	Ainno_16251	Ainnocence	AIN1-42_AINNL0042	Lot# MB15NO4142	TC00820835	M004	3446	ng/ml	75475	100.34							20220127_SR2DLT_Ab
AB01974191	01	Ainno_16251	Ainnocence	AIN1-42_AINNL0042	Lot# MB15NO4142	TC00820834	M004	3446	ng/ml	75200	99.95							20220127_SR2DLT_Ab
AB01974191	01	Ainno_16251	Ainnocence	AIN1-42_AINNL0042	Lot# MB15NO4142	TC00820835	M005	1091	ng/ml	70500	93.49							20220127_SR2DLT_Ab
AB01974191	01	Ainno_16251	Ainnocence	AIN1-42_AINNL0042	Lot# MB15NO4142	TC00820834	M005	1091	ng/ml	71325	94.62							20220127_SR2DLT_Ab
AB01974191	01	Ainno_16251	Ainnocence	AIN1-42_AINNL0042	Lot# MB15NO4142	TC00820835	M006	345.1	ng/ml	79850	106.37							20220127_SR2DLT_Ab
AB01974191	01	Ainno_16251	Ainnocence	AIN1-42_AINNL0042	Lot# MB15NO4142	TC00820834	M006	345.1	ng/ml	74425	98.89							20220127_SR2DLT_Ab
AB01974191	01	Ainno_16251	Ainnocence	AIN1-42_AINNL0042	Lot# MB15NO4142	TC00820835	M007	109.2	ng/ml	97050	130.08							20220127_SR2DLT_Ab
AB01974191	01	Ainno_16251	Ainnocence	AIN1-42_AINNL0042	Lot# MB15NO4142	TC00820834	M007	109.2	ng/ml	98325	131.78							20220127_SR2DLT_Ab
AB01974191	01	Ainno_16251	Ainnocence	AIN1-42_AINNL0042	Lot# MB15NO4142	TC00820835	M008	34.56	ng/ml	27900	34.77							20220127_SR2DLT_Ab
AB01974191	01	Ainno_16251	Ainnocence	AIN1-42_AINNL0042	Lot# MB15NO4142	TC00820834	M008	34.56	ng/ml	24675	30.42							20220127_SR2DLT_Ab
AB01974191	01	Ainno_16251	Ainnocence	AIN1-42_AINNL0042	Lot# MB15NO4142	TC00820835	M009	10.94	ng/ml	9100	8.86							20220127_SR2DLT_Ab
AB01974191	01	Ainno_16251	Ainnocence	AIN1-42_AINNL0042	Lot# MB15NO4142	TC00820834	M009	10.94	ng/ml	7825	7.23							20220127_SR2DLT_Ab
AB01974191	01	Ainno_16251	Ainnocence	AIN1-42_AINNL0042	Lot# MB15NO4142	TC00820835	M010	3.461	ng/ml	3650	1.35							20220127_SR2DLT_Ab
AB01974191	01	Ainno_16251	Ainnocence	AIN1-42_AINNL0042	Lot# MB15NO4142	TC00820834	M010	3.461	ng/ml	4750	3							20220127_SR2DLT_Ab
AB01974191	01	Ainno_16251	Ainnocence	AIN1-42_AINNL0042	Lot# MB15NO4142	TC00820835	M011	1.095	ng/ml	3325	0.9							20220127_SR2DLT_Ab
AB01974191	01	Ainno_16251	Ainnocence	AIN1-42_AINNL0042	Lot# MB15NO4142	TC00820834	M011	1.095	ng/ml	4525	2.69							20220127_SR2DLT_Ab
AB01974191	01	Ainno_16251	Ainnocence	AIN1-42_AINNL0042	Lot# MB15NO4142	TC00820835	M012	0.3466	ng/ml	4550	2.59							20220127_SR2DLT_Ab
AB01974191	01	Ainno_16251	Ainnocence	AIN1-42_AINNL0042	Lot# MB15NO4142	TC00820834	M012	0.3466	ng/ml	3850	1.76							20220127_SR2DLT_Ab
AB01974191	01	Ainno_16251	Ainnocence	AIN1-42_AINNL0042	Lot# MB15NO4142	TC00820835	M013	0.1097	ng/ml	3850	1.63							20220127_SR2DLT_Ab
AB01974191	01	Ainno_16251	Ainnocence	AIN1-42_AINNL0042	Lot# MB15NO4142	TC00820834	M013	0.1097	ng/ml	2725	0.21							20220127_SR2DLT_Ab
AB01974191	01	Ainno_16251	Ainnocence	AIN1-42_AINNL0042	Lot# MB15NO4142	TC00820835	M014	0.03471	ng/ml	4725	2.83							20220127_SR2DLT_Ab
AB01974191	01	Ainno_16251	Ainnocence	AIN1-42_AINNL0042	Lot# MB15NO4142	TC00820834	M014	0.03471	ng/ml	3475	1.24							20220127_SR2DLT_Ab
AB01974191	01	Ainno_16251	Ainnocence	AIN1-42_AINNL0042	Lot# MB15NO4142	TC00820835	M015	0.01098	ng/ml	3825	1.59							20220127_SR2DLT_Ab
AB01974191	01	Ainno_16251	Ainnocence	AIN1-42_AINNL0042	Lot# MB15NO4142	TC00820834	M015	0.01098	ng/ml	2850	0.38							20220127_SR2DLT_Ab
AB01974191	01	Ainno_16251	Ainnocence	AIN1-42_AINNL0042	Lot# MB15NO4142	TC00820835	M016	0.003476	ng/ml	3225	0.77							20220127_SR2DLT_Ab
AB01974191	01	Ainno_16251	Ainnocence	AIN1-42_AINNL0042	Lot# MB15NO4142	TC00820834	M016	0.003476	ng/ml	2050	-0.72							20220127_SR2DLT_Ab
AB01974191	01	Ainno_16251	Ainnocence	AIN1-42_AINNL0042	Lot# MB15NO4142	TC00820835	M017	0.0011	ng/ml	2350	-0.44							20220127_SR2DLT_Ab
AB01974191	01	Ainno_16251	Ainnocence	AIN1-42_AINNL0042	Lot# MB15NO4142	TC00820834	M017	0.0011	ng/ml	3525	1.31							20220127_SR2DLT_Ab
AB01974191	01	Ainno_16251	Ainnocence	AIN1-42_AINNL0042	Lot# MB15NO4142	TC00820835	M018	0.0003481	ng/ml	5400	3.76							20220127_SR2DLT_Ab
AB01974191	01	Ainno_16251	Ainnocence	AIN1-42_AINNL0042	Lot# MB15NO4142	TC00820834	M018	0.0003481	ng/ml	2850	0.38							20220127_SR2DLT_Ab
AB01974191	01	Ainno_16251	Ainnocence	AIN1-42_AINNL0042	Lot# MB15NO4142	TC00820835	M019	0.0001102	ng/ml	4125	2.01							20220127_SR2DLT_Ab
AB01974191	01	Ainno_16251	Ainnocence	AIN1-42_AINNL0042	Lot# MB15NO4142	TC00820834	M019	0.0001102	ng/ml	2725	0.21							20220127_SR2DLT_Ab
AB01974191	01	Ainno_16251	Ainnocence	AIN1-42_AINNL0042	Lot# MB15NO4142	TC00820835	M020	3.486e-05	ng/ml	3825	1.59							20220127_SR2DLT_Ab
AB01974191	01	Ainno_16251	Ainnocence	AIN1-42_AINNL0042	Lot# MB15NO4142	TC00820834	M020	3.486e-05	ng/ml	1775	-1.1							20220127_SR2DLT_Ab
AB01974191	01	Ainno_16251	Ainnocence	AIN1-42_AINNL0042	Lot# MB15NO4142	TC00820835	M021	1.103e-05	ng/ml	2675	0.01							20220127_SR2DLT_Ab
AB01974191	01	Ainno_16251	Ainnocence	AIN1-42_AINNL0042	Lot# MB15NO4142	TC00820834	M021	1.103e-05	ng/ml	2250	-0.44							20220127_SR2DLT_Ab
AB01974191	01	Ainno_16251	Ainnocence	AIN1-42_AINNL0042	Lot# MB15NO4142	TC00820835	M022	3.491e-06	ng/ml	2700	0.04							20220127_SR2DLT_Ab
AB01974191	01	Ainno_16251	Ainnocence	AIN1-42_AINNL0042	Lot# MB15NO4142	TC00820834	M022	3.491e-06	ng/ml	2475	-0.13							20220127_SR2DLT_Ab
AB01974192	01	Ainno_16251	Ainnocence	AIN1-11_AINNL0011	Lot# MB15NO4111	TC00820835	N003	5440	ng/ml	3075	0.56	>5440	Inactive	-0.85	1.31	0	40	20220127_SR2DLT_Ab
AB01974192	01	Ainno_16251	Ainnocence	AIN1-11_AINNL0011	Lot# MB15NO4111	TC00820834	N003	5440	ng/ml	2475	-0.13							20220127_SR2DLT_Ab
AB01974192	01	Ainno_16251	Ainnocence	AIN1-11_AINNL0011	Lot# MB15NO4111	TC00820835	N004	1722	ng/ml	5900	4.45							20220127_SR2DLT_Ab
AB01974192	01	Ainno_16251	Ainnocence	AIN1-11_AINNL0011	Lot# MB15NO4111	TC00820834	N004	1722	ng/ml	2250	-0.44							20220127_SR2DLT_Ab
AB01974192	01	Ainno_16251	Ainnocence	AIN1-11_AINNL0011	Lot# MB15NO4111	TC00820835	N005	544.8	ng/ml	2825	0.22							20220127_SR2DLT_Ab
AB01974192	01	Ainno_16251	Ainnocence	AIN1-11_AINNL0011	Lot# MB15NO4111	TC00820834	N005	544.8	ng/ml	2225	-0.48							20220127_SR2DLT_Ab
AB01974192	01	Ainno_16251	Ainnocence	AIN1-11_AINNL0011	Lot# MB15NO4111	TC00820835	N006	172.4	ng/ml	2900	0.32							20220127_SR2DLT_Ab
AB01974192	01	Ainno_16251	Ainnocence	AIN1-11_AINNL0011	Lot# MB15NO4111	TC00820834	N006	172.4	ng/ml	2450	-0.17							20220127_SR2DLT_Ab
AB01974192	01	Ainno_16251	Ainnocence	AIN1-11_AINNL0011	Lot# MB15NO4111	TC00820835	N007	54.56	ng/ml	2550	-0.16							20220127_SR2DLT_Ab
AB01974192	01	Ainno_16251	Ainnocence	AIN1-11_AINNL0011	Lot# MB15NO4111	TC00820834	N007	54.56	ng/ml	3100	0.73							20220127_SR2DLT_Ab
AB01974192	01	Ainno_16251	Ainnocence	AIN1-11_AINNL0011	Lot# MB15NO4111	TC00820835	N008	17.26	ng/ml	2450	-0.3							20220127_SR2DLT_Ab
AB01974192	01	Ainno_16251	Ainnocence	AIN1-11_AINNL0011	Lot# MB15NO4111	TC00820834	N008	17.26	ng/ml	2775	0.28							20220127_SR2DLT_Ab
AB01974192	01	Ainno_16251	Ainnocence	AIN1-11_AINNL0011	Lot# MB15NO4111	TC00820835	N009	5.464	ng/ml	3075	0.56							20220127_SR2DLT_Ab
AB01974192	01	Ainno_16251	Ainnocence	AIN1-11_AINNL0011	Lot# MB15NO4111	TC00820834	N009	5.464	ng/ml	2425	-0.2							20220127_SR2DLT_Ab
AB01974192	01	Ainno_16251	Ainnocence	AIN1-11_AINNL0011	Lot# MB15NO4111	TC00820835	N010	1.729	ng/ml	2725	0.08							20220127_SR2DLT_Ab
AB01974192	01	Ainno_16251	Ainnocence	AIN1-11_AINNL0011	Lot# MB15NO4111	TC00820834	N010	1.729	ng/ml	3300	1							20220127_SR2DLT_Ab
AB01974192	01	Ainno_16251	Ainnocence	AIN1-11_AINNL0011	Lot# MB15NO4111	TC00820835	N011	0.5471	ng/ml	3525	1.18							20220127_SR2DLT_Ab
AB01974192	01	Ainno_16251	Ainnocence	AIN1-11_AINNL0011	Lot# MB15NO4111	TC00820834	N011	0.5471	ng/ml	2975	0.55							20220127_SR2DLT_Ab
AB01974192	01	Ainno_16251	Ainnocence	AIN1-11_AINNL0011	Lot# MB15NO4111	TC00820835	N012	0.1731	ng/ml	3775	1.52							20220127_SR2DLT_Ab
AB01974192	01	Ainno_16251	Ainnocence	AIN1-11_AINNL0011	Lot# MB15NO4111	TC00820834	N012	0.1731	ng/ml	3250	0.93							20220127_SR2DLT_Ab
AB01974192	01	Ainno_16251	Ainnocence	AIN1-11_AINNL0011	Lot# MB15NO4111	TC00820835	N013	0.05479	ng/ml	2475	-0.27							20220127_SR2DLT_Ab
AB01974192	01	Ainno_16251	Ainnocence	AIN1-11_AINNL0011	Lot# MB15NO4111	TC00820834	N013	0.05479	ng/ml	2100	-0.65							20220127_SR2DLT_Ab
AB01974192	01	Ainno_16251	Ainnocence	AIN1-11_AINNL0011	Lot# MB15NO4111	TC00820835	N014	0.01734	ng/ml	3300	0.87							20220127_SR2DLT_Ab
AB01974192	01	Ainno_16251	Ainnocence	AIN1-11_AINNL0011	Lot# MB15NO4111	TC00820834	N014	0.01734	ng/ml	2150	-0.58							20220127_SR2DLT_Ab
AB01974192	01	Ainno_16251	Ainnocence	AIN1-11_AINNL0011	Lot# MB15NO4111	TC00820835	N015	0.005487	ng/ml	3600	1.28							20220127_SR2DLT_Ab
AB01974192	01	Ainno_16251	Ainnocence	AIN1-11_AINNL0011	Lot# MB15NO4111	TC00820834	N015	0.005487	ng/ml	3425	1.17							20220127_SR2DLT_Ab
AB01974192	01	Ainno_16251	Ainnocence	AIN1-11_AINNL0011	Lot# MB15NO4111	TC00820835	N016	0.001736	ng/ml	3500	1.15							20220127_SR2DLT_Ab
AB01974192	01	Ainno_16251	Ainnocence	AIN1-11_AINNL0011	Lot# MB15NO4111	TC00820834	N016	0.001736	ng/ml	2400	-0.24							20220127_SR2DLT_Ab
AB01974192	01	Ainno_16251	Ainnocence	AIN1-11_AINNL0011	Lot# MB15NO4111	TC00820835	N017	0.0005495	ng/ml	4125	2.01							20220127_SR2DLT_Ab
AB01974192	01	Ainno_16251	Ainnocence	AIN1-11_AINNL0011	Lot# MB15NO4111	TC00820834	N017	0.0005495	ng/ml	2700	0.18							20220127_SR2DLT_Ab
AB01974192	01	Ainno_16251	Ainnocence	AIN1-11_AINNL0011	Lot# MB15NO4111	TC00820835	N018	0.0001739	ng/ml	2200	-0.65							20220127_SR2DLT_Ab
AB01974192	01	Ainno_16251	Ainnocence	AIN1-11_AINNL0011	Lot# MB15NO4111	TC00820834	N018	0.0001739	ng/ml	2975	0.55							20220127_SR2DLT_Ab
AB01974192	01	Ainno_16251	Ainnocence	AIN1-11_AINNL0011	Lot# MB15NO4111	TC00820835	N019	5.503e-05	ng/ml	5100	3.35							20220127_SR2DLT_Ab
AB01974192	01	Ainno_16251	Ainnocence	AIN1-11_AINNL0011	Lot# MB15NO4111	TC00820834	N019	5.503e-05	ng/ml	3725	1.59							20220127_SR2DLT_Ab
AB01974192	01	Ainno_16251	Ainnocence	AIN1-11_AINNL0011	Lot# MB15NO4111	TC00820835	N020	1.741e-05	ng/ml	4100	1.97							20220127_SR2DLT_Ab
AB01974192	01	Ainno_16251	Ainnocence	AIN1-11_AINNL0011	Lot# MB15NO4111	TC00820834	N020	1.741e-05	ng/ml	3075	0.69							20220127_SR2DLT_Ab
AB01974192	01	Ainno_16251	Ainnocence	AIN1-11_AINNL0011	Lot# MB15NO4111	TC00820835	N021	5.511e-06	ng/ml	3425	1.04							20220127_SR2DLT_Ab
AB01974192	01	Ainno_16251	Ainnocence	AIN1-11_AINNL0011	Lot# MB15NO4111	TC00820834	N021	5.511e-06	ng/ml	4375	2.48							20220127_SR2DLT_Ab
AB01974192	01	Ainno_16251	Ainnocence	AIN1-11_AINNL0011	Lot# MB15NO4111	TC00820835	N022	1.744e-06	ng/ml	3450	1.08							20220127_SR2DLT_Ab
AB01974192	01	Ainno_16251	Ainnocence	AIN1-11_AINNL0011	Lot# MB15NO4111	TC00820834	N022	1.744e-06	ng/ml	2075	-0.68							20220127_SR2DLT_Ab
AB01974193	01	Ainno_16251	Ainnocence	AIN1-14_AINNL0014	Lot# MB15NO4114	TC00820835	O003	11890	ng/ml	3050	0.53	>11890	Inactive	-0.9	0.75	0	40	20220127_SR2DLT_Ab
AB01974193	01	Ainno_16251	Ainnocence	AIN1-14_AINNL0014	Lot# MB15NO4114	TC00820834	O003	11890	ng/ml	3400	1.14							20220127_SR2DLT_Ab
AB01974193	01	Ainno_16251	Ainnocence	AIN1-14_AINNL0014	Lot# MB15NO4114	TC00820835	O004	3763	ng/ml	2750	0.11							20220127_SR2DLT_Ab
AB01974193	01	Ainno_16251	Ainnocence	AIN1-14_AINNL0014	Lot# MB15NO4114	TC00820834	O004	3763	ng/ml	2650	0.11							20220127_SR2DLT_Ab
AB01974193	01	Ainno_16251	Ainnocence	AIN1-14_AINNL0014	Lot# MB15NO4114	TC00820835	O005	1191	ng/ml	3100	0.59							20220127_SR2DLT_Ab
AB01974193	01	Ainno_16251	Ainnocence	AIN1-14_AINNL0014	Lot# MB15NO4114	TC00820834	O005	1191	ng/ml	2500	-0.1							20220127_SR2DLT_Ab
AB01974193	01	Ainno_16251	Ainnocence	AIN1-14_AINNL0014	Lot# MB15NO4114	TC00820835	O006	376.8	ng/ml	3400	1.01							20220127_SR2DLT_Ab
AB01974193	01	Ainno_16251	Ainnocence	AIN1-14_AINNL0014	Lot# MB15NO4114	TC00820834	O006	376.8	ng/ml	2950	0.52							20220127_SR2DLT_Ab
AB01974193	01	Ainno_16251	Ainnocence	AIN1-14_AINNL0014	Lot# MB15NO4114	TC00820835	O007	119.2	ng/ml	2500	-0.23							20220127_SR2DLT_Ab
AB01974193	01	Ainno_16251	Ainnocence	AIN1-14_AINNL0014	Lot# MB15NO4114	TC00820834	O007	119.2	ng/ml	2225	-0.48							20220127_SR2DLT_Ab
AB01974193	01	Ainno_16251	Ainnocence	AIN1-14_AINNL0014	Lot# MB15NO4114	TC00820835	O008	37.74	ng/ml	2850	0.25							20220127_SR2DLT_Ab
AB01974193	01	Ainno_16251	Ainnocence	AIN1-14_AINNL0014	Lot# MB15NO4114	TC00820834	O008	37.74	ng/ml	2875	0.42							20220127_SR2DLT_Ab
AB01974193	01	Ainno_16251	Ainnocence	AIN1-14_AINNL0014	Lot# MB15NO4114	TC00820835	O009	11.94	ng/ml	2700	0.04							20220127_SR2DLT_Ab
AB01974193	01	Ainno_16251	Ainnocence	AIN1-14_AINNL0014	Lot# MB15NO4114	TC00820834	O009	11.94	ng/ml	2875	0.42							20220127_SR2DLT_Ab
AB01974193	01	Ainno_16251	Ainnocence	AIN1-14_AINNL0014	Lot# MB15NO4114	TC00820835	O010	3.779	ng/ml	3475	1.11							20220127_SR2DLT_Ab
AB01974193	01	Ainno_16251	Ainnocence	AIN1-14_AINNL0014	Lot# MB15NO4114	TC00820834	O010	3.779	ng/ml	2775	0.28							20220127_SR2DLT_Ab
AB01974193	01	Ainno_16251	Ainnocence	AIN1-14_AINNL0014	Lot# MB15NO4114	TC00820835	O011	1.196	ng/ml	3225	0.77							20220127_SR2DLT_Ab
AB01974193	01	Ainno_16251	Ainnocence	AIN1-14_AINNL0014	Lot# MB15NO4114	TC00820834	O011	1.196	ng/ml	3025	0.62							20220127_SR2DLT_Ab
AB01974193	01	Ainno_16251	Ainnocence	AIN1-14_AINNL0014	Lot# MB15NO4114	TC00820835	O012	0.3784	ng/ml	3950	1.77							20220127_SR2DLT_Ab
AB01974193	01	Ainno_16251	Ainnocence	AIN1-14_AINNL0014	Lot# MB15NO4114	TC00820834	O012	0.3784	ng/ml	2750	0.25							20220127_SR2DLT_Ab
AB01974193	01	Ainno_16251	Ainnocence	AIN1-14_AINNL0014	Lot# MB15NO4114	TC00820835	O013	0.1198	ng/ml	2175	-0.68							20220127_SR2DLT_Ab
AB01974193	01	Ainno_16251	Ainnocence	AIN1-14_AINNL0014	Lot# MB15NO4114	TC00820834	O013	0.1198	ng/ml	1975	-0.82							20220127_SR2DLT_Ab
AB01974193	01	Ainno_16251	Ainnocence	AIN1-14_AINNL0014	Lot# MB15NO4114	TC00820835	O014	0.0379	ng/ml	3000	0.46							20220127_SR2DLT_Ab
AB01974193	01	Ainno_16251	Ainnocence	AIN1-14_AINNL0014	Lot# MB15NO4114	TC00820834	O014	0.0379	ng/ml	2800	0.31							20220127_SR2DLT_Ab
AB01974193	01	Ainno_16251	Ainnocence	AIN1-14_AINNL0014	Lot# MB15NO4114	TC00820835	O015	0.01199	ng/ml	3375	0.97							20220127_SR2DLT_Ab
AB01974193	01	Ainno_16251	Ainnocence	AIN1-14_AINNL0014	Lot# MB15NO4114	TC00820834	O015	0.01199	ng/ml	2325	-0.34							20220127_SR2DLT_Ab
AB01974193	01	Ainno_16251	Ainnocence	AIN1-14_AINNL0014	Lot# MB15NO4114	TC00820835	O016	0.003795	ng/ml	3300	0.87							20220127_SR2DLT_Ab
AB01974193	01	Ainno_16251	Ainnocence	AIN1-14_AINNL0014	Lot# MB15NO4114	TC00820834	O016	0.003795	ng/ml	2675	0.14							20220127_SR2DLT_Ab
AB01974193	01	Ainno_16251	Ainnocence	AIN1-14_AINNL0014	Lot# MB15NO4114	TC00820835	O017	0.001201	ng/ml	3275	0.84							20220127_SR2DLT_Ab
AB01974193	01	Ainno_16251	Ainnocence	AIN1-14_AINNL0014	Lot# MB15NO4114	TC00820834	O017	0.001201	ng/ml	3100	0.73							20220127_SR2DLT_Ab
AB01974193	01	Ainno_16251	Ainnocence	AIN1-14_AINNL0014	Lot# MB15NO4114	TC00820835	O018	0.0003801	ng/ml	3250	0.8							20220127_SR2DLT_Ab
AB01974193	01	Ainno_16251	Ainnocence	AIN1-14_AINNL0014	Lot# MB15NO4114	TC00820834	O018	0.0003801	ng/ml	2350	-0.31							20220127_SR2DLT_Ab
AB01974193	01	Ainno_16251	Ainnocence	AIN1-14_AINNL0014	Lot# MB15NO4114	TC00820835	O019	0.0001203	ng/ml	2700	0.04							20220127_SR2DLT_Ab
AB01974193	01	Ainno_16251	Ainnocence	AIN1-14_AINNL0014	Lot# MB15NO4114	TC00820834	O019	0.0001203	ng/ml	3100	0.73							20220127_SR2DLT_Ab
AB01974193	01	Ainno_16251	Ainnocence	AIN1-14_AINNL0014	Lot# MB15NO4114	TC00820835	O020	3.806e-05	ng/ml	3650	1.35							20220127_SR2DLT_Ab
AB01974193	01	Ainno_16251	Ainnocence	AIN1-14_AINNL0014	Lot# MB15NO4114	TC00820834	O020	3.806e-05	ng/ml	2125	-0.62							20220127_SR2DLT_Ab
AB01974193	01	Ainno_16251	Ainnocence	AIN1-14_AINNL0014	Lot# MB15NO4114	TC00820835	O021	1.205e-05	ng/ml	4000	1.83							20220127_SR2DLT_Ab
AB01974193	01	Ainno_16251	Ainnocence	AIN1-14_AINNL0014	Lot# MB15NO4114	TC00820834	O021	1.205e-05	ng/ml	2200	-0.51							20220127_SR2DLT_Ab
AB01974193	01	Ainno_16251	Ainnocence	AIN1-14_AINNL0014	Lot# MB15NO4114	TC00820835	O022	3.812e-06	ng/ml	2725	0.08							20220127_SR2DLT_Ab
AB01974193	01	Ainno_16251	Ainnocence	AIN1-14_AINNL0014	Lot# MB15NO4114	TC00820834	O022	3.812e-06	ng/ml	3075	0.69							20220127_SR2DLT_Ab
AB01974194	01	Ainno_16251	Ainnocence	AIN1-17_AINNL0017	Lot# MB15NO4117	TC00820835	P003	11780	ng/ml	2475	-0.27	>11780	Inactive	-6.63	0.63	0	40	20220127_SR2DLT_Ab
AB01974194	01	Ainno_16251	Ainnocence	AIN1-17_AINNL0017	Lot# MB15NO4117	TC00820834	P003	11780	ng/ml	3300	1							20220127_SR2DLT_Ab
AB01974194	01	Ainno_16251	Ainnocence	AIN1-17_AINNL0017	Lot# MB15NO4117	TC00820835	P004	3728	ng/ml	3075	0.56							20220127_SR2DLT_Ab
AB01974194	01	Ainno_16251	Ainnocence	AIN1-17_AINNL0017	Lot# MB15NO4117	TC00820834	P004	3728	ng/ml	3300	1							20220127_SR2DLT_Ab
AB01974194	01	Ainno_16251	Ainnocence	AIN1-17_AINNL0017	Lot# MB15NO4117	TC00820835	P005	1180	ng/ml	2050	-0.85							20220127_SR2DLT_Ab
AB01974194	01	Ainno_16251	Ainnocence	AIN1-17_AINNL0017	Lot# MB15NO4117	TC00820834	P005	1180	ng/ml	3750	1.62							20220127_SR2DLT_Ab
AB01974194	01	Ainno_16251	Ainnocence	AIN1-17_AINNL0017	Lot# MB15NO4117	TC00820835	P006	373.3	ng/ml	2425	-0.34							20220127_SR2DLT_Ab
AB01974194	01	Ainno_16251	Ainnocence	AIN1-17_AINNL0017	Lot# MB15NO4117	TC00820834	P006	373.3	ng/ml	1900	-0.92							20220127_SR2DLT_Ab
AB01974194	01	Ainno_16251	Ainnocence	AIN1-17_AINNL0017	Lot# MB15NO4117	TC00820835	P007	118.1	ng/ml	2625	-0.06							20220127_SR2DLT_Ab
AB01974194	01	Ainno_16251	Ainnocence	AIN1-17_AINNL0017	Lot# MB15NO4117	TC00820834	P007	118.1	ng/ml	2200	-0.51							20220127_SR2DLT_Ab
AB01974194	01	Ainno_16251	Ainnocence	AIN1-17_AINNL0017	Lot# MB15NO4117	TC00820835	P008	37.39	ng/ml	2850	0.25							20220127_SR2DLT_Ab
AB01974194	01	Ainno_16251	Ainnocence	AIN1-17_AINNL0017	Lot# MB15NO4117	TC00820834	P008	37.39	ng/ml	1875	-0.96							20220127_SR2DLT_Ab
AB01974194	01	Ainno_16251	Ainnocence	AIN1-17_AINNL0017	Lot# MB15NO4117	TC00820835	P009	11.83	ng/ml	2575	-0.13							20220127_SR2DLT_Ab
AB01974194	01	Ainno_16251	Ainnocence	AIN1-17_AINNL0017	Lot# MB15NO4117	TC00820834	P009	11.83	ng/ml	1600	-1.34							20220127_SR2DLT_Ab
AB01974194	01	Ainno_16251	Ainnocence	AIN1-17_AINNL0017	Lot# MB15NO4117	TC00820835	P010	3.744	ng/ml	3175	0.7							20220127_SR2DLT_Ab
AB01974194	01	Ainno_16251	Ainnocence	AIN1-17_AINNL0017	Lot# MB15NO4117	TC00820834	P010	3.744	ng/ml	2075	-0.68							20220127_SR2DLT_Ab
AB01974194	01	Ainno_16251	Ainnocence	AIN1-17_AINNL0017	Lot# MB15NO4117	TC00820835	P011	1.185	ng/ml	2500	-0.23							20220127_SR2DLT_Ab
AB01974194	01	Ainno_16251	Ainnocence	AIN1-17_AINNL0017	Lot# MB15NO4117	TC00820834	P011	1.185	ng/ml	2075	-0.68							20220127_SR2DLT_Ab
AB01974194	01	Ainno_16251	Ainnocence	AIN1-17_AINNL0017	Lot# MB15NO4117	TC00820835	P012	0.3749	ng/ml	3150	0.66							20220127_SR2DLT_Ab
AB01974194	01	Ainno_16251	Ainnocence	AIN1-17_AINNL0017	Lot# MB15NO4117	TC00820834	P012	0.3749	ng/ml	2425	-0.2							20220127_SR2DLT_Ab
AB01974194	01	Ainno_16251	Ainnocence	AIN1-17_AINNL0017	Lot# MB15NO4117	TC00820835	P013	0.1187	ng/ml	2575	-0.13							20220127_SR2DLT_Ab
AB01974194	01	Ainno_16251	Ainnocence	AIN1-17_AINNL0017	Lot# MB15NO4117	TC00820834	P013	0.1187	ng/ml	2525	-0.06							20220127_SR2DLT_Ab
AB01974194	01	Ainno_16251	Ainnocence	AIN1-17_AINNL0017	Lot# MB15NO4117	TC00820835	P014	0.03755	ng/ml	3250	0.8							20220127_SR2DLT_Ab
AB01974194	01	Ainno_16251	Ainnocence	AIN1-17_AINNL0017	Lot# MB15NO4117	TC00820834	P014	0.03755	ng/ml	2550	-0.03							20220127_SR2DLT_Ab
AB01974194	01	Ainno_16251	Ainnocence	AIN1-17_AINNL0017	Lot# MB15NO4117	TC00820835	P015	0.01188	ng/ml	2550	-0.16							20220127_SR2DLT_Ab
AB01974194	01	Ainno_16251	Ainnocence	AIN1-17_AINNL0017	Lot# MB15NO4117	TC00820834	P015	0.01188	ng/ml	2250	-0.44							20220127_SR2DLT_Ab
AB01974194	01	Ainno_16251	Ainnocence	AIN1-17_AINNL0017	Lot# MB15NO4117	TC00820835	P016	0.00376	ng/ml	3025	0.49							20220127_SR2DLT_Ab
AB01974194	01	Ainno_16251	Ainnocence	AIN1-17_AINNL0017	Lot# MB15NO4117	TC00820834	P016	0.00376	ng/ml	2150	-0.58							20220127_SR2DLT_Ab
AB01974194	01	Ainno_16251	Ainnocence	AIN1-17_AINNL0017	Lot# MB15NO4117	TC00820835	P017	0.00119	ng/ml	2625	-0.06							20220127_SR2DLT_Ab
AB01974194	01	Ainno_16251	Ainnocence	AIN1-17_AINNL0017	Lot# MB15NO4117	TC00820834	P017	0.00119	ng/ml	3225	0.9							20220127_SR2DLT_Ab
AB01974194	01	Ainno_16251	Ainnocence	AIN1-17_AINNL0017	Lot# MB15NO4117	TC00820835	P018	0.0003766	ng/ml	2725	0.08							20220127_SR2DLT_Ab
AB01974194	01	Ainno_16251	Ainnocence	AIN1-17_AINNL0017	Lot# MB15NO4117	TC00820834	P018	0.0003766	ng/ml	2800	0.31							20220127_SR2DLT_Ab
AB01974194	01	Ainno_16251	Ainnocence	AIN1-17_AINNL0017	Lot# MB15NO4117	TC00820835	P019	0.0001192	ng/ml	2875	0.28							20220127_SR2DLT_Ab
AB01974194	01	Ainno_16251	Ainnocence	AIN1-17_AINNL0017	Lot# MB15NO4117	TC00820834	P019	0.0001192	ng/ml	2475	-0.13							20220127_SR2DLT_Ab
AB01974194	01	Ainno_16251	Ainnocence	AIN1-17_AINNL0017	Lot# MB15NO4117	TC00820835	P020	3.771e-05	ng/ml	2675	0.01							20220127_SR2DLT_Ab
AB01974194	01	Ainno_16251	Ainnocence	AIN1-17_AINNL0017	Lot# MB15NO4117	TC00820834	P020	3.771e-05	ng/ml	2875	0.42							20220127_SR2DLT_Ab
AB01974194	01	Ainno_16251	Ainnocence	AIN1-17_AINNL0017	Lot# MB15NO4117	TC00820835	P021	1.193e-05	ng/ml	2625	-0.06							20220127_SR2DLT_Ab
AB01974194	01	Ainno_16251	Ainnocence	AIN1-17_AINNL0017	Lot# MB15NO4117	TC00820834	P021	1.193e-05	ng/ml	2250	-0.44							20220127_SR2DLT_Ab
AB01974194	01	Ainno_16251	Ainnocence	AIN1-17_AINNL0017	Lot# MB15NO4117	TC00820835	P022	3.777e-06	ng/ml	3450	1.08							20220127_SR2DLT_Ab
AB01974194	01	Ainno_16251	Ainnocence	AIN1-17_AINNL0017	Lot# MB15NO4117	TC00820834	P022	3.777e-06	ng/ml	2800	0.31							20220127_SR2DLT_Ab
AB01974195	01	Ainno_16251	Ainnocence	AIN1-12_AINNL0012	Lot# MB15NO2405	TC00820838	A003	41220	ng/ml	2850	-0.07	>41220	Inactive	-1.02	0.89	0	40	20220127_SR2DLT_Ab
AB01974195	01	Ainno_16251	Ainnocence	AIN1-12_AINNL0012	Lot# MB15NO2405	TC00820837	A003	41220	ng/ml	1400	-1.64							20220127_SR2DLT_Ab
AB01974195	01	Ainno_16251	Ainnocence	AIN1-12_AINNL0012	Lot# MB15NO2405	TC00820838	A004	13040	ng/ml	2000	-1.24							20220127_SR2DLT_Ab
AB01974195	01	Ainno_16251	Ainnocence	AIN1-12_AINNL0012	Lot# MB15NO2405	TC00820837	A004	13040	ng/ml	2000	-0.78							20220127_SR2DLT_Ab
AB01974195	01	Ainno_16251	Ainnocence	AIN1-12_AINNL0012	Lot# MB15NO2405	TC00820838	A005	4128	ng/ml	2375	-0.73							20220127_SR2DLT_Ab
AB01974195	01	Ainno_16251	Ainnocence	AIN1-12_AINNL0012	Lot# MB15NO2405	TC00820837	A005	4128	ng/ml	1875	-0.96							20220127_SR2DLT_Ab
AB01974195	01	Ainno_16251	Ainnocence	AIN1-12_AINNL0012	Lot# MB15NO2405	TC00820838	A006	1306	ng/ml	3125	0.3							20220127_SR2DLT_Ab
AB01974195	01	Ainno_16251	Ainnocence	AIN1-12_AINNL0012	Lot# MB15NO2405	TC00820837	A006	1306	ng/ml	2325	-0.32							20220127_SR2DLT_Ab
AB01974195	01	Ainno_16251	Ainnocence	AIN1-12_AINNL0012	Lot# MB15NO2405	TC00820838	A007	413.4	ng/ml	2875	-0.04							20220127_SR2DLT_Ab
AB01974195	01	Ainno_16251	Ainnocence	AIN1-12_AINNL0012	Lot# MB15NO2405	TC00820837	A007	413.4	ng/ml	2100	-0.64							20220127_SR2DLT_Ab
AB01974195	01	Ainno_16251	Ainnocence	AIN1-12_AINNL0012	Lot# MB15NO2405	TC00820838	A008	130.8	ng/ml	2525	-0.52							20220127_SR2DLT_Ab
AB01974195	01	Ainno_16251	Ainnocence	AIN1-12_AINNL0012	Lot# MB15NO2405	TC00820837	A008	130.8	ng/ml	1600	-1.35							20220127_SR2DLT_Ab
AB01974195	01	Ainno_16251	Ainnocence	AIN1-12_AINNL0012	Lot# MB15NO2405	TC00820838	A009	41.4	ng/ml	3950	1.43							20220127_SR2DLT_Ab
AB01974195	01	Ainno_16251	Ainnocence	AIN1-12_AINNL0012	Lot# MB15NO2405	TC00820837	A009	41.4	ng/ml	2300	-0.35							20220127_SR2DLT_Ab
AB01974195	01	Ainno_16251	Ainnocence	AIN1-12_AINNL0012	Lot# MB15NO2405	TC00820838	A010	13.1	ng/ml	2400	-0.69							20220127_SR2DLT_Ab
AB01974195	01	Ainno_16251	Ainnocence	AIN1-12_AINNL0012	Lot# MB15NO2405	TC00820837	A010	13.1	ng/ml	1900	-0.92							20220127_SR2DLT_Ab
AB01974195	01	Ainno_16251	Ainnocence	AIN1-12_AINNL0012	Lot# MB15NO2405	TC00820838	A011	4.146	ng/ml	3000	0.13							20220127_SR2DLT_Ab
AB01974195	01	Ainno_16251	Ainnocence	AIN1-12_AINNL0012	Lot# MB15NO2405	TC00820837	A011	4.146	ng/ml	1475	-1.53							20220127_SR2DLT_Ab
AB01974195	01	Ainno_16251	Ainnocence	AIN1-12_AINNL0012	Lot# MB15NO2405	TC00820838	A012	1.312	ng/ml	2225	-0.93							20220127_SR2DLT_Ab
AB01974195	01	Ainno_16251	Ainnocence	AIN1-12_AINNL0012	Lot# MB15NO2405	TC00820837	A012	1.312	ng/ml	1925	-0.89							20220127_SR2DLT_Ab
AB01974195	01	Ainno_16251	Ainnocence	AIN1-12_AINNL0012	Lot# MB15NO2405	TC00820838	A013	0.4152	ng/ml	3675	1.06							20220127_SR2DLT_Ab
AB01974195	01	Ainno_16251	Ainnocence	AIN1-12_AINNL0012	Lot# MB15NO2405	TC00820837	A013	0.4152	ng/ml	1900	-0.92							20220127_SR2DLT_Ab
AB01974195	01	Ainno_16251	Ainnocence	AIN1-12_AINNL0012	Lot# MB15NO2405	TC00820838	A014	0.1314	ng/ml	2425	-0.66							20220127_SR2DLT_Ab
AB01974195	01	Ainno_16251	Ainnocence	AIN1-12_AINNL0012	Lot# MB15NO2405	TC00820837	A014	0.1314	ng/ml	1675	-1.25							20220127_SR2DLT_Ab
AB01974195	01	Ainno_16251	Ainnocence	AIN1-12_AINNL0012	Lot# MB15NO2405	TC00820838	A015	0.04158	ng/ml	2700	-0.28							20220127_SR2DLT_Ab
AB01974195	01	Ainno_16251	Ainnocence	AIN1-12_AINNL0012	Lot# MB15NO2405	TC00820837	A015	0.04158	ng/ml	2700	0.22							20220127_SR2DLT_Ab
AB01974195	01	Ainno_16251	Ainnocence	AIN1-12_AINNL0012	Lot# MB15NO2405	TC00820838	A016	0.01316	ng/ml	3000	0.13							20220127_SR2DLT_Ab
AB01974195	01	Ainno_16251	Ainnocence	AIN1-12_AINNL0012	Lot# MB15NO2405	TC00820837	A016	0.01316	ng/ml	2000	-0.78							20220127_SR2DLT_Ab
AB01974195	01	Ainno_16251	Ainnocence	AIN1-12_AINNL0012	Lot# MB15NO2405	TC00820838	A017	0.004164	ng/ml	2525	-0.52							20220127_SR2DLT_Ab
AB01974195	01	Ainno_16251	Ainnocence	AIN1-12_AINNL0012	Lot# MB15NO2405	TC00820837	A017	0.004164	ng/ml	1700	-1.21							20220127_SR2DLT_Ab
AB01974195	01	Ainno_16251	Ainnocence	AIN1-12_AINNL0012	Lot# MB15NO2405	TC00820838	A018	0.001318	ng/ml	2525	-0.52							20220127_SR2DLT_Ab
AB01974195	01	Ainno_16251	Ainnocence	AIN1-12_AINNL0012	Lot# MB15NO2405	TC00820837	A018	0.001318	ng/ml	3375	1.18							20220127_SR2DLT_Ab
AB01974195	01	Ainno_16251	Ainnocence	AIN1-12_AINNL0012	Lot# MB15NO2405	TC00820838	A019	0.000417	ng/ml	3425	0.71							20220127_SR2DLT_Ab
AB01974195	01	Ainno_16251	Ainnocence	AIN1-12_AINNL0012	Lot# MB15NO2405	TC00820837	A019	0.000417	ng/ml	1600	-1.35							20220127_SR2DLT_Ab
AB01974195	01	Ainno_16251	Ainnocence	AIN1-12_AINNL0012	Lot# MB15NO2405	TC00820838	A020	0.000132	ng/ml	3200	0.4							20220127_SR2DLT_Ab
AB01974195	01	Ainno_16251	Ainnocence	AIN1-12_AINNL0012	Lot# MB15NO2405	TC00820837	A020	0.000132	ng/ml	1950	-0.85							20220127_SR2DLT_Ab
AB01974195	01	Ainno_16251	Ainnocence	AIN1-12_AINNL0012	Lot# MB15NO2405	TC00820838	A021	4.176e-05	ng/ml	2425	-0.66							20220127_SR2DLT_Ab
AB01974195	01	Ainno_16251	Ainnocence	AIN1-12_AINNL0012	Lot# MB15NO2405	TC00820837	A021	4.176e-05	ng/ml	2100	-0.64							20220127_SR2DLT_Ab
AB01974195	01	Ainno_16251	Ainnocence	AIN1-12_AINNL0012	Lot# MB15NO2405	TC00820838	A022	1.321e-05	ng/ml	2200	-0.97							20220127_SR2DLT_Ab
AB01974195	01	Ainno_16251	Ainnocence	AIN1-12_AINNL0012	Lot# MB15NO2405	TC00820837	A022	1.321e-05	ng/ml	2125	-0.6							20220127_SR2DLT_Ab
AB01974196	01	Ainno_16251	Ainnocence	AIN1-20_AINNL0020	Lot# MB15NO2406	TC00820838	B003	45220	ng/ml	2900	-0.01	>45220	Inactive	-20.82	0.74	>9999	40	20220127_SR2DLT_Ab
AB01974196	01	Ainno_16251	Ainnocence	AIN1-20_AINNL0020	Lot# MB15NO2406	TC00820837	B003	45220	ng/ml	2425	-0.17							20220127_SR2DLT_Ab
AB01974196	01	Ainno_16251	Ainnocence	AIN1-20_AINNL0020	Lot# MB15NO2406	TC00820838	B004	14310	ng/ml	2850	-0.07							20220127_SR2DLT_Ab
AB01974196	01	Ainno_16251	Ainnocence	AIN1-20_AINNL0020	Lot# MB15NO2406	TC00820837	B004	14310	ng/ml	2725	0.26							20220127_SR2DLT_Ab
AB01974196	01	Ainno_16251	Ainnocence	AIN1-20_AINNL0020	Lot# MB15NO2406	TC00820838	B005	4529	ng/ml	2550	-0.49							20220127_SR2DLT_Ab
AB01974196	01	Ainno_16251	Ainnocence	AIN1-20_AINNL0020	Lot# MB15NO2406	TC00820837	B005	4529	ng/ml	2675	0.18							20220127_SR2DLT_Ab
AB01974196	01	Ainno_16251	Ainnocence	AIN1-20_AINNL0020	Lot# MB15NO2406	TC00820838	B006	1433	ng/ml	2500	-0.55							20220127_SR2DLT_Ab
AB01974196	01	Ainno_16251	Ainnocence	AIN1-20_AINNL0020	Lot# MB15NO2406	TC00820837	B006	1433	ng/ml	2000	-0.78							20220127_SR2DLT_Ab
AB01974196	01	Ainno_16251	Ainnocence	AIN1-20_AINNL0020	Lot# MB15NO2406	TC00820838	B007	453.5	ng/ml	2875	-0.04							20220127_SR2DLT_Ab
AB01974196	01	Ainno_16251	Ainnocence	AIN1-20_AINNL0020	Lot# MB15NO2406	TC00820837	B007	453.5	ng/ml	1650	-1.28							20220127_SR2DLT_Ab
AB01974196	01	Ainno_16251	Ainnocence	AIN1-20_AINNL0020	Lot# MB15NO2406	TC00820838	B008	143.5	ng/ml	2600	-0.42							20220127_SR2DLT_Ab
AB01974196	01	Ainno_16251	Ainnocence	AIN1-20_AINNL0020	Lot# MB15NO2406	TC00820837	B008	143.5	ng/ml	1725	-1.17							20220127_SR2DLT_Ab
AB01974196	01	Ainno_16251	Ainnocence	AIN1-20_AINNL0020	Lot# MB15NO2406	TC00820838	B009	45.42	ng/ml	1600	-1.79							20220127_SR2DLT_Ab
AB01974196	01	Ainno_16251	Ainnocence	AIN1-20_AINNL0020	Lot# MB15NO2406	TC00820837	B009	45.42	ng/ml	1775	-1.1							20220127_SR2DLT_Ab
AB01974196	01	Ainno_16251	Ainnocence	AIN1-20_AINNL0020	Lot# MB15NO2406	TC00820838	B010	14.37	ng/ml	3050	0.2							20220127_SR2DLT_Ab
AB01974196	01	Ainno_16251	Ainnocence	AIN1-20_AINNL0020	Lot# MB15NO2406	TC00820837	B010	14.37	ng/ml	2550	0.01							20220127_SR2DLT_Ab
AB01974196	01	Ainno_16251	Ainnocence	AIN1-20_AINNL0020	Lot# MB15NO2406	TC00820838	B011	4.548	ng/ml	2925	0.03							20220127_SR2DLT_Ab
AB01974196	01	Ainno_16251	Ainnocence	AIN1-20_AINNL0020	Lot# MB15NO2406	TC00820837	B011	4.548	ng/ml	1950	-0.85							20220127_SR2DLT_Ab
AB01974196	01	Ainno_16251	Ainnocence	AIN1-20_AINNL0020	Lot# MB15NO2406	TC00820838	B012	1.439	ng/ml	4150	1.71							20220127_SR2DLT_Ab
AB01974196	01	Ainno_16251	Ainnocence	AIN1-20_AINNL0020	Lot# MB15NO2406	TC00820837	B012	1.439	ng/ml	2675	0.18							20220127_SR2DLT_Ab
AB01974196	01	Ainno_16251	Ainnocence	AIN1-20_AINNL0020	Lot# MB15NO2406	TC00820838	B013	0.4555	ng/ml	2500	-0.55							20220127_SR2DLT_Ab
AB01974196	01	Ainno_16251	Ainnocence	AIN1-20_AINNL0020	Lot# MB15NO2406	TC00820837	B013	0.4555	ng/ml	2350	-0.28							20220127_SR2DLT_Ab
AB01974196	01	Ainno_16251	Ainnocence	AIN1-20_AINNL0020	Lot# MB15NO2406	TC00820838	B014	0.1441	ng/ml	2475	-0.59							20220127_SR2DLT_Ab
AB01974196	01	Ainno_16251	Ainnocence	AIN1-20_AINNL0020	Lot# MB15NO2406	TC00820837	B014	0.1441	ng/ml	2600	0.08							20220127_SR2DLT_Ab
AB01974196	01	Ainno_16251	Ainnocence	AIN1-20_AINNL0020	Lot# MB15NO2406	TC00820838	B015	0.04561	ng/ml	2400	-0.69							20220127_SR2DLT_Ab
AB01974196	01	Ainno_16251	Ainnocence	AIN1-20_AINNL0020	Lot# MB15NO2406	TC00820837	B015	0.04561	ng/ml	2550	0.01							20220127_SR2DLT_Ab
AB01974196	01	Ainno_16251	Ainnocence	AIN1-20_AINNL0020	Lot# MB15NO2406	TC00820838	B016	0.01443	ng/ml	2450	-0.62							20220127_SR2DLT_Ab
AB01974196	01	Ainno_16251	Ainnocence	AIN1-20_AINNL0020	Lot# MB15NO2406	TC00820837	B016	0.01443	ng/ml	1800	-1.07							20220127_SR2DLT_Ab
AB01974196	01	Ainno_16251	Ainnocence	AIN1-20_AINNL0020	Lot# MB15NO2406	TC00820838	B017	0.004568	ng/ml	2100	-1.1							20220127_SR2DLT_Ab
AB01974196	01	Ainno_16251	Ainnocence	AIN1-20_AINNL0020	Lot# MB15NO2406	TC00820837	B017	0.004568	ng/ml	2125	-0.6							20220127_SR2DLT_Ab
AB01974196	01	Ainno_16251	Ainnocence	AIN1-20_AINNL0020	Lot# MB15NO2406	TC00820838	B018	0.001446	ng/ml	3550	0.88							20220127_SR2DLT_Ab
AB01974196	01	Ainno_16251	Ainnocence	AIN1-20_AINNL0020	Lot# MB15NO2406	TC00820837	B018	0.001446	ng/ml	2825	0.4							20220127_SR2DLT_Ab
AB01974196	01	Ainno_16251	Ainnocence	AIN1-20_AINNL0020	Lot# MB15NO2406	TC00820838	B019	0.0004574	ng/ml	3000	0.13							20220127_SR2DLT_Ab
AB01974196	01	Ainno_16251	Ainnocence	AIN1-20_AINNL0020	Lot# MB15NO2406	TC00820837	B019	0.0004574	ng/ml	2425	-0.17							20220127_SR2DLT_Ab
AB01974196	01	Ainno_16251	Ainnocence	AIN1-20_AINNL0020	Lot# MB15NO2406	TC00820838	B020	0.0001448	ng/ml	3425	0.71							20220127_SR2DLT_Ab
AB01974196	01	Ainno_16251	Ainnocence	AIN1-20_AINNL0020	Lot# MB15NO2406	TC00820837	B020	0.0001448	ng/ml	1725	-1.17							20220127_SR2DLT_Ab
AB01974196	01	Ainno_16251	Ainnocence	AIN1-20_AINNL0020	Lot# MB15NO2406	TC00820838	B021	4.581e-05	ng/ml	2650	-0.35							20220127_SR2DLT_Ab
AB01974196	01	Ainno_16251	Ainnocence	AIN1-20_AINNL0020	Lot# MB15NO2406	TC00820837	B021	4.581e-05	ng/ml	2725	0.26							20220127_SR2DLT_Ab
AB01974196	01	Ainno_16251	Ainnocence	AIN1-20_AINNL0020	Lot# MB15NO2406	TC00820838	B022	1.45e-05	ng/ml	2375	-0.73							20220127_SR2DLT_Ab
AB01974196	01	Ainno_16251	Ainnocence	AIN1-20_AINNL0020	Lot# MB15NO2406	TC00820837	B022	1.45e-05	ng/ml	2775	0.33							20220127_SR2DLT_Ab
AB01974197	01	Ainno_16251	Ainnocence	AIN1-23_AINNL0023	Lot# MB15NO2407	TC00820838	C003	3440	ng/ml	2800	-0.14	>3440	Inactive	1	2.31		40	20220127_SR2DLT_Ab
AB01974197	01	Ainno_16251	Ainnocence	AIN1-23_AINNL0023	Lot# MB15NO2407	TC00820837	C003	3440	ng/ml	2100	-0.64							20220127_SR2DLT_Ab
AB01974197	01	Ainno_16251	Ainnocence	AIN1-23_AINNL0023	Lot# MB15NO2407	TC00820838	C004	1089	ng/ml	3525	0.85							20220127_SR2DLT_Ab
AB01974197	01	Ainno_16251	Ainnocence	AIN1-23_AINNL0023	Lot# MB15NO2407	TC00820837	C004	1089	ng/ml	2875	0.47							20220127_SR2DLT_Ab
AB01974197	01	Ainno_16251	Ainnocence	AIN1-23_AINNL0023	Lot# MB15NO2407	TC00820838	C005	344.5	ng/ml	3675	1.06							20220127_SR2DLT_Ab
AB01974197	01	Ainno_16251	Ainnocence	AIN1-23_AINNL0023	Lot# MB15NO2407	TC00820837	C005	344.5	ng/ml	2000	-0.78							20220127_SR2DLT_Ab
AB01974197	01	Ainno_16251	Ainnocence	AIN1-23_AINNL0023	Lot# MB15NO2407	TC00820838	C006	109	ng/ml	9475	9.01							20220127_SR2DLT_Ab
AB01974197	01	Ainno_16251	Ainnocence	AIN1-23_AINNL0023	Lot# MB15NO2407	TC00820837	C006	109	ng/ml	2375	-0.24							20220127_SR2DLT_Ab
AB01974197	01	Ainno_16251	Ainnocence	AIN1-23_AINNL0023	Lot# MB15NO2407	TC00820838	C007	34.5	ng/ml	2550	-0.49							20220127_SR2DLT_Ab
AB01974197	01	Ainno_16251	Ainnocence	AIN1-23_AINNL0023	Lot# MB15NO2407	TC00820837	C007	34.5	ng/ml	1625	-1.32							20220127_SR2DLT_Ab
AB01974197	01	Ainno_16251	Ainnocence	AIN1-23_AINNL0023	Lot# MB15NO2407	TC00820838	C008	10.92	ng/ml	3200	0.4							20220127_SR2DLT_Ab
AB01974197	01	Ainno_16251	Ainnocence	AIN1-23_AINNL0023	Lot# MB15NO2407	TC00820837	C008	10.92	ng/ml	2200	-0.49							20220127_SR2DLT_Ab
AB01974197	01	Ainno_16251	Ainnocence	AIN1-23_AINNL0023	Lot# MB15NO2407	TC00820838	C009	3.455	ng/ml	3000	0.13							20220127_SR2DLT_Ab
AB01974197	01	Ainno_16251	Ainnocence	AIN1-23_AINNL0023	Lot# MB15NO2407	TC00820837	C009	3.455	ng/ml	2050	-0.71							20220127_SR2DLT_Ab
AB01974197	01	Ainno_16251	Ainnocence	AIN1-23_AINNL0023	Lot# MB15NO2407	TC00820838	C010	1.093	ng/ml	2450	-0.62							20220127_SR2DLT_Ab
AB01974197	01	Ainno_16251	Ainnocence	AIN1-23_AINNL0023	Lot# MB15NO2407	TC00820837	C010	1.093	ng/ml	2925	0.54							20220127_SR2DLT_Ab
AB01974197	01	Ainno_16251	Ainnocence	AIN1-23_AINNL0023	Lot# MB15NO2407	TC00820838	C011	0.346	ng/ml	3400	0.68							20220127_SR2DLT_Ab
AB01974197	01	Ainno_16251	Ainnocence	AIN1-23_AINNL0023	Lot# MB15NO2407	TC00820837	C011	0.346	ng/ml	2475	-0.1							20220127_SR2DLT_Ab
AB01974197	01	Ainno_16251	Ainnocence	AIN1-23_AINNL0023	Lot# MB15NO2407	TC00820838	C012	0.1095	ng/ml	2450	-0.62							20220127_SR2DLT_Ab
AB01974197	01	Ainno_16251	Ainnocence	AIN1-23_AINNL0023	Lot# MB15NO2407	TC00820837	C012	0.1095	ng/ml	2300	-0.35							20220127_SR2DLT_Ab
AB01974197	01	Ainno_16251	Ainnocence	AIN1-23_AINNL0023	Lot# MB15NO2407	TC00820838	C013	0.03465	ng/ml	2950	0.06							20220127_SR2DLT_Ab
AB01974197	01	Ainno_16251	Ainnocence	AIN1-23_AINNL0023	Lot# MB15NO2407	TC00820837	C013	0.03465	ng/ml	2300	-0.35							20220127_SR2DLT_Ab
AB01974197	01	Ainno_16251	Ainnocence	AIN1-23_AINNL0023	Lot# MB15NO2407	TC00820838	C014	0.01096	ng/ml	3150	0.34							20220127_SR2DLT_Ab
AB01974197	01	Ainno_16251	Ainnocence	AIN1-23_AINNL0023	Lot# MB15NO2407	TC00820837	C014	0.01096	ng/ml	2250	-0.42							20220127_SR2DLT_Ab
AB01974197	01	Ainno_16251	Ainnocence	AIN1-23_AINNL0023	Lot# MB15NO2407	TC00820838	C015	0.00347	ng/ml	2550	-0.49							20220127_SR2DLT_Ab
AB01974197	01	Ainno_16251	Ainnocence	AIN1-23_AINNL0023	Lot# MB15NO2407	TC00820837	C015	0.00347	ng/ml	2650	0.15							20220127_SR2DLT_Ab
AB01974197	01	Ainno_16251	Ainnocence	AIN1-23_AINNL0023	Lot# MB15NO2407	TC00820838	C016	0.001098	ng/ml	10275	10.1							20220127_SR2DLT_Ab
AB01974197	01	Ainno_16251	Ainnocence	AIN1-23_AINNL0023	Lot# MB15NO2407	TC00820837	C016	0.001098	ng/ml	2575	0.04							20220127_SR2DLT_Ab
AB01974197	01	Ainno_16251	Ainnocence	AIN1-23_AINNL0023	Lot# MB15NO2407	TC00820838	C017	0.0003475	ng/ml	2825	-0.11							20220127_SR2DLT_Ab
AB01974197	01	Ainno_16251	Ainnocence	AIN1-23_AINNL0023	Lot# MB15NO2407	TC00820837	C017	0.0003475	ng/ml	2125	-0.6							20220127_SR2DLT_Ab
AB01974197	01	Ainno_16251	Ainnocence	AIN1-23_AINNL0023	Lot# MB15NO2407	TC00820838	C018	0.00011	ng/ml	2250	-0.9							20220127_SR2DLT_Ab
AB01974197	01	Ainno_16251	Ainnocence	AIN1-23_AINNL0023	Lot# MB15NO2407	TC00820837	C018	0.00011	ng/ml	2450	-0.14							20220127_SR2DLT_Ab
AB01974197	01	Ainno_16251	Ainnocence	AIN1-23_AINNL0023	Lot# MB15NO2407	TC00820838	C019	3.48e-05	ng/ml	2425	-0.66							20220127_SR2DLT_Ab
AB01974197	01	Ainno_16251	Ainnocence	AIN1-23_AINNL0023	Lot# MB15NO2407	TC00820837	C019	3.48e-05	ng/ml	1950	-0.85							20220127_SR2DLT_Ab
AB01974197	01	Ainno_16251	Ainnocence	AIN1-23_AINNL0023	Lot# MB15NO2407	TC00820838	C020	1.101e-05	ng/ml	4550	2.26							20220127_SR2DLT_Ab
AB01974197	01	Ainno_16251	Ainnocence	AIN1-23_AINNL0023	Lot# MB15NO2407	TC00820837	C020	1.101e-05	ng/ml	1825	-1.03							20220127_SR2DLT_Ab
AB01974197	01	Ainno_16251	Ainnocence	AIN1-23_AINNL0023	Lot# MB15NO2407	TC00820838	C021	3.485e-06	ng/ml	2650	-0.35							20220127_SR2DLT_Ab
AB01974197	01	Ainno_16251	Ainnocence	AIN1-23_AINNL0023	Lot# MB15NO2407	TC00820837	C021	3.485e-06	ng/ml	2400	-0.21							20220127_SR2DLT_Ab
AB01974197	01	Ainno_16251	Ainnocence	AIN1-23_AINNL0023	Lot# MB15NO2407	TC00820838	C022	1.103e-06	ng/ml	3625	0.99							20220127_SR2DLT_Ab
AB01974197	01	Ainno_16251	Ainnocence	AIN1-23_AINNL0023	Lot# MB15NO2407	TC00820837	C022	1.103e-06	ng/ml	3325	1.11							20220127_SR2DLT_Ab
AB01974198	01	Ainno_16251	Ainnocence	AIN1-19_AINNL0019	Lot# MB15NO4119	TC00820838	D003	11670	ng/ml	2975	0.1	>11670	Inactive	-0.09	0.88	0	40	20220127_SR2DLT_Ab
AB01974198	01	Ainno_16251	Ainnocence	AIN1-19_AINNL0019	Lot# MB15NO4119	TC00820837	D003	11670	ng/ml	2975	0.61							20220127_SR2DLT_Ab
AB01974198	01	Ainno_16251	Ainnocence	AIN1-19_AINNL0019	Lot# MB15NO4119	TC00820838	D004	3693	ng/ml	2375	-0.73							20220127_SR2DLT_Ab
AB01974198	01	Ainno_16251	Ainnocence	AIN1-19_AINNL0019	Lot# MB15NO4119	TC00820837	D004	3693	ng/ml	2200	-0.49							20220127_SR2DLT_Ab
AB01974198	01	Ainno_16251	Ainnocence	AIN1-19_AINNL0019	Lot# MB15NO4119	TC00820838	D005	1169	ng/ml	3000	0.13							20220127_SR2DLT_Ab
AB01974198	01	Ainno_16251	Ainnocence	AIN1-19_AINNL0019	Lot# MB15NO4119	TC00820837	D005	1169	ng/ml	3050	0.72							20220127_SR2DLT_Ab
AB01974198	01	Ainno_16251	Ainnocence	AIN1-19_AINNL0019	Lot# MB15NO4119	TC00820838	D006	369.8	ng/ml	3250	0.47							20220127_SR2DLT_Ab
AB01974198	01	Ainno_16251	Ainnocence	AIN1-19_AINNL0019	Lot# MB15NO4119	TC00820837	D006	369.8	ng/ml	2350	-0.28							20220127_SR2DLT_Ab
AB01974198	01	Ainno_16251	Ainnocence	AIN1-19_AINNL0019	Lot# MB15NO4119	TC00820838	D007	117	ng/ml	3500	0.82							20220127_SR2DLT_Ab
AB01974198	01	Ainno_16251	Ainnocence	AIN1-19_AINNL0019	Lot# MB15NO4119	TC00820837	D007	117	ng/ml	2400	-0.21							20220127_SR2DLT_Ab
AB01974198	01	Ainno_16251	Ainnocence	AIN1-19_AINNL0019	Lot# MB15NO4119	TC00820838	D008	37.04	ng/ml	2625	-0.38							20220127_SR2DLT_Ab
AB01974198	01	Ainno_16251	Ainnocence	AIN1-19_AINNL0019	Lot# MB15NO4119	TC00820837	D008	37.04	ng/ml	2825	0.4							20220127_SR2DLT_Ab
AB01974198	01	Ainno_16251	Ainnocence	AIN1-19_AINNL0019	Lot# MB15NO4119	TC00820838	D009	11.72	ng/ml	4025	1.54							20220127_SR2DLT_Ab
AB01974198	01	Ainno_16251	Ainnocence	AIN1-19_AINNL0019	Lot# MB15NO4119	TC00820837	D009	11.72	ng/ml	2175	-0.53							20220127_SR2DLT_Ab
AB01974198	01	Ainno_16251	Ainnocence	AIN1-19_AINNL0019	Lot# MB15NO4119	TC00820838	D010	3.709	ng/ml	4000	1.5							20220127_SR2DLT_Ab
AB01974198	01	Ainno_16251	Ainnocence	AIN1-19_AINNL0019	Lot# MB15NO4119	TC00820837	D010	3.709	ng/ml	1925	-0.89							20220127_SR2DLT_Ab
AB01974198	01	Ainno_16251	Ainnocence	AIN1-19_AINNL0019	Lot# MB15NO4119	TC00820838	D011	1.174	ng/ml	4175	1.74							20220127_SR2DLT_Ab
AB01974198	01	Ainno_16251	Ainnocence	AIN1-19_AINNL0019	Lot# MB15NO4119	TC00820837	D011	1.174	ng/ml	2900	0.51							20220127_SR2DLT_Ab
AB01974198	01	Ainno_16251	Ainnocence	AIN1-19_AINNL0019	Lot# MB15NO4119	TC00820838	D012	0.3714	ng/ml	2800	-0.14							20220127_SR2DLT_Ab
AB01974198	01	Ainno_16251	Ainnocence	AIN1-19_AINNL0019	Lot# MB15NO4119	TC00820837	D012	0.3714	ng/ml	2525	-0.03							20220127_SR2DLT_Ab
AB01974198	01	Ainno_16251	Ainnocence	AIN1-19_AINNL0019	Lot# MB15NO4119	TC00820838	D013	0.1175	ng/ml	2225	-0.93							20220127_SR2DLT_Ab
AB01974198	01	Ainno_16251	Ainnocence	AIN1-19_AINNL0019	Lot# MB15NO4119	TC00820837	D013	0.1175	ng/ml	1675	-1.25							20220127_SR2DLT_Ab
AB01974198	01	Ainno_16251	Ainnocence	AIN1-19_AINNL0019	Lot# MB15NO4119	TC00820838	D014	0.0372	ng/ml	4625	2.36							20220127_SR2DLT_Ab
AB01974198	01	Ainno_16251	Ainnocence	AIN1-19_AINNL0019	Lot# MB15NO4119	TC00820837	D014	0.0372	ng/ml	3400	1.22							20220127_SR2DLT_Ab
AB01974198	01	Ainno_16251	Ainnocence	AIN1-19_AINNL0019	Lot# MB15NO4119	TC00820838	D015	0.01177	ng/ml	2825	-0.11							20220127_SR2DLT_Ab
AB01974198	01	Ainno_16251	Ainnocence	AIN1-19_AINNL0019	Lot# MB15NO4119	TC00820837	D015	0.01177	ng/ml	2325	-0.32							20220127_SR2DLT_Ab
AB01974198	01	Ainno_16251	Ainnocence	AIN1-19_AINNL0019	Lot# MB15NO4119	TC00820838	D016	0.003725	ng/ml	3950	1.43							20220127_SR2DLT_Ab
AB01974198	01	Ainno_16251	Ainnocence	AIN1-19_AINNL0019	Lot# MB15NO4119	TC00820837	D016	0.003725	ng/ml	2975	0.61							20220127_SR2DLT_Ab
AB01974198	01	Ainno_16251	Ainnocence	AIN1-19_AINNL0019	Lot# MB15NO4119	TC00820838	D017	0.001179	ng/ml	3500	0.82							20220127_SR2DLT_Ab
AB01974198	01	Ainno_16251	Ainnocence	AIN1-19_AINNL0019	Lot# MB15NO4119	TC00820837	D017	0.001179	ng/ml	2700	0.22							20220127_SR2DLT_Ab
AB01974198	01	Ainno_16251	Ainnocence	AIN1-19_AINNL0019	Lot# MB15NO4119	TC00820838	D018	0.000373	ng/ml	3825	1.26							20220127_SR2DLT_Ab
AB01974198	01	Ainno_16251	Ainnocence	AIN1-19_AINNL0019	Lot# MB15NO4119	TC00820837	D018	0.000373	ng/ml	2675	0.18							20220127_SR2DLT_Ab
AB01974198	01	Ainno_16251	Ainnocence	AIN1-19_AINNL0019	Lot# MB15NO4119	TC00820838	D019	0.0001181	ng/ml	2850	-0.07							20220127_SR2DLT_Ab
AB01974198	01	Ainno_16251	Ainnocence	AIN1-19_AINNL0019	Lot# MB15NO4119	TC00820837	D019	0.0001181	ng/ml	1825	-1.03							20220127_SR2DLT_Ab
AB01974198	01	Ainno_16251	Ainnocence	AIN1-19_AINNL0019	Lot# MB15NO4119	TC00820838	D020	3.736e-05	ng/ml	3375	0.64							20220127_SR2DLT_Ab
AB01974198	01	Ainno_16251	Ainnocence	AIN1-19_AINNL0019	Lot# MB15NO4119	TC00820837	D020	3.736e-05	ng/ml	2425	-0.17							20220127_SR2DLT_Ab
AB01974198	01	Ainno_16251	Ainnocence	AIN1-19_AINNL0019	Lot# MB15NO4119	TC00820838	D021	1.182e-05	ng/ml	3550	0.88							20220127_SR2DLT_Ab
AB01974198	01	Ainno_16251	Ainnocence	AIN1-19_AINNL0019	Lot# MB15NO4119	TC00820837	D021	1.182e-05	ng/ml	2750	0.29							20220127_SR2DLT_Ab
AB01974198	01	Ainno_16251	Ainnocence	AIN1-19_AINNL0019	Lot# MB15NO4119	TC00820838	D022	3.741e-06	ng/ml	4725	2.5							20220127_SR2DLT_Ab
AB01974198	01	Ainno_16251	Ainnocence	AIN1-19_AINNL0019	Lot# MB15NO4119	TC00820837	D022	3.741e-06	ng/ml	2475	-0.1							20220127_SR2DLT_Ab
AB01974199	01	Ainno_16251	Ainnocence	AIN1-24_AINNL0024	Lot# MB15NO4124	TC00820838	E003	12110	ng/ml	3775	1.19	>12110	Inactive	-1.01	0.84	0	40	20220127_SR2DLT_Ab
AB01974199	01	Ainno_16251	Ainnocence	AIN1-24_AINNL0024	Lot# MB15NO4124	TC00820837	E003	12110	ng/ml	1700	-1.21							20220127_SR2DLT_Ab
AB01974199	01	Ainno_16251	Ainnocence	AIN1-24_AINNL0024	Lot# MB15NO4124	TC00820838	E004	3832	ng/ml	2600	-0.42							20220127_SR2DLT_Ab
AB01974199	01	Ainno_16251	Ainnocence	AIN1-24_AINNL0024	Lot# MB15NO4124	TC00820837	E004	3832	ng/ml	3000	0.65							20220127_SR2DLT_Ab
AB01974199	01	Ainno_16251	Ainnocence	AIN1-24_AINNL0024	Lot# MB15NO4124	TC00820838	E005	1213	ng/ml	2975	0.1							20220127_SR2DLT_Ab
AB01974199	01	Ainno_16251	Ainnocence	AIN1-24_AINNL0024	Lot# MB15NO4124	TC00820837	E005	1213	ng/ml	1600	-1.35							20220127_SR2DLT_Ab
AB01974199	01	Ainno_16251	Ainnocence	AIN1-24_AINNL0024	Lot# MB15NO4124	TC00820838	E006	383.8	ng/ml	2200	-0.97							20220127_SR2DLT_Ab
AB01974199	01	Ainno_16251	Ainnocence	AIN1-24_AINNL0024	Lot# MB15NO4124	TC00820837	E006	383.8	ng/ml	3225	0.97							20220127_SR2DLT_Ab
AB01974199	01	Ainno_16251	Ainnocence	AIN1-24_AINNL0024	Lot# MB15NO4124	TC00820838	E007	121.4	ng/ml	2550	-0.49							20220127_SR2DLT_Ab
AB01974199	01	Ainno_16251	Ainnocence	AIN1-24_AINNL0024	Lot# MB15NO4124	TC00820837	E007	121.4	ng/ml	2150	-0.57							20220127_SR2DLT_Ab
AB01974199	01	Ainno_16251	Ainnocence	AIN1-24_AINNL0024	Lot# MB15NO4124	TC00820838	E008	38.43	ng/ml	2875	-0.04							20220127_SR2DLT_Ab
AB01974199	01	Ainno_16251	Ainnocence	AIN1-24_AINNL0024	Lot# MB15NO4124	TC00820837	E008	38.43	ng/ml	2000	-0.78							20220127_SR2DLT_Ab
AB01974199	01	Ainno_16251	Ainnocence	AIN1-24_AINNL0024	Lot# MB15NO4124	TC00820838	E009	12.16	ng/ml	2975	0.1							20220127_SR2DLT_Ab
AB01974199	01	Ainno_16251	Ainnocence	AIN1-24_AINNL0024	Lot# MB15NO4124	TC00820837	E009	12.16	ng/ml	1600	-1.35							20220127_SR2DLT_Ab
AB01974199	01	Ainno_16251	Ainnocence	AIN1-24_AINNL0024	Lot# MB15NO4124	TC00820838	E010	3.849	ng/ml	1725	-1.62							20220127_SR2DLT_Ab
AB01974199	01	Ainno_16251	Ainnocence	AIN1-24_AINNL0024	Lot# MB15NO4124	TC00820837	E010	3.849	ng/ml	2375	-0.24							20220127_SR2DLT_Ab
AB01974199	01	Ainno_16251	Ainnocence	AIN1-24_AINNL0024	Lot# MB15NO4124	TC00820838	E011	1.218	ng/ml	2575	-0.45							20220127_SR2DLT_Ab
AB01974199	01	Ainno_16251	Ainnocence	AIN1-24_AINNL0024	Lot# MB15NO4124	TC00820837	E011	1.218	ng/ml	2050	-0.71							20220127_SR2DLT_Ab
AB01974199	01	Ainno_16251	Ainnocence	AIN1-24_AINNL0024	Lot# MB15NO4124	TC00820838	E012	0.3854	ng/ml	2775	-0.18							20220127_SR2DLT_Ab
AB01974199	01	Ainno_16251	Ainnocence	AIN1-24_AINNL0024	Lot# MB15NO4124	TC00820837	E012	0.3854	ng/ml	2750	0.29							20220127_SR2DLT_Ab
AB01974199	01	Ainno_16251	Ainnocence	AIN1-24_AINNL0024	Lot# MB15NO4124	TC00820838	E013	0.122	ng/ml	1950	-1.31							20220127_SR2DLT_Ab
AB01974199	01	Ainno_16251	Ainnocence	AIN1-24_AINNL0024	Lot# MB15NO4124	TC00820837	E013	0.122	ng/ml	1625	-1.32							20220127_SR2DLT_Ab
AB01974199	01	Ainno_16251	Ainnocence	AIN1-24_AINNL0024	Lot# MB15NO4124	TC00820838	E014	0.0386	ng/ml	3475	0.78							20220127_SR2DLT_Ab
AB01974199	01	Ainno_16251	Ainnocence	AIN1-24_AINNL0024	Lot# MB15NO4124	TC00820837	E014	0.0386	ng/ml	2350	-0.28							20220127_SR2DLT_Ab
AB01974199	01	Ainno_16251	Ainnocence	AIN1-24_AINNL0024	Lot# MB15NO4124	TC00820838	E015	0.01222	ng/ml	2925	0.03							20220127_SR2DLT_Ab
AB01974199	01	Ainno_16251	Ainnocence	AIN1-24_AINNL0024	Lot# MB15NO4124	TC00820837	E015	0.01222	ng/ml	2300	-0.35							20220127_SR2DLT_Ab
AB01974199	01	Ainno_16251	Ainnocence	AIN1-24_AINNL0024	Lot# MB15NO4124	TC00820838	E016	0.003866	ng/ml	2200	-0.97							20220127_SR2DLT_Ab
AB01974199	01	Ainno_16251	Ainnocence	AIN1-24_AINNL0024	Lot# MB15NO4124	TC00820837	E016	0.003866	ng/ml	3025	0.68							20220127_SR2DLT_Ab
AB01974199	01	Ainno_16251	Ainnocence	AIN1-24_AINNL0024	Lot# MB15NO4124	TC00820838	E017	0.001223	ng/ml	2750	-0.21							20220127_SR2DLT_Ab
AB01974199	01	Ainno_16251	Ainnocence	AIN1-24_AINNL0024	Lot# MB15NO4124	TC00820837	E017	0.001223	ng/ml	2475	-0.1							20220127_SR2DLT_Ab
AB01974199	01	Ainno_16251	Ainnocence	AIN1-24_AINNL0024	Lot# MB15NO4124	TC00820838	E018	0.0003871	ng/ml	2725	-0.25							20220127_SR2DLT_Ab
AB01974199	01	Ainno_16251	Ainnocence	AIN1-24_AINNL0024	Lot# MB15NO4124	TC00820837	E018	0.0003871	ng/ml	2525	-0.03							20220127_SR2DLT_Ab
AB01974199	01	Ainno_16251	Ainnocence	AIN1-24_AINNL0024	Lot# MB15NO4124	TC00820838	E019	0.0001225	ng/ml	2600	-0.42							20220127_SR2DLT_Ab
AB01974199	01	Ainno_16251	Ainnocence	AIN1-24_AINNL0024	Lot# MB15NO4124	TC00820837	E019	0.0001225	ng/ml	2475	-0.1							20220127_SR2DLT_Ab
AB01974199	01	Ainno_16251	Ainnocence	AIN1-24_AINNL0024	Lot# MB15NO4124	TC00820838	E020	3.877e-05	ng/ml	4150	1.71							20220127_SR2DLT_Ab
AB01974199	01	Ainno_16251	Ainnocence	AIN1-24_AINNL0024	Lot# MB15NO4124	TC00820837	E020	3.877e-05	ng/ml	2675	0.18							20220127_SR2DLT_Ab
AB01974199	01	Ainno_16251	Ainnocence	AIN1-24_AINNL0024	Lot# MB15NO4124	TC00820838	E021	1.227e-05	ng/ml	2025	-1.21							20220127_SR2DLT_Ab
AB01974199	01	Ainno_16251	Ainnocence	AIN1-24_AINNL0024	Lot# MB15NO4124	TC00820837	E021	1.227e-05	ng/ml	2775	0.33							20220127_SR2DLT_Ab
AB01974199	01	Ainno_16251	Ainnocence	AIN1-24_AINNL0024	Lot# MB15NO4124	TC00820838	E022	3.882e-06	ng/ml	3350	0.61							20220127_SR2DLT_Ab
AB01974199	01	Ainno_16251	Ainnocence	AIN1-24_AINNL0024	Lot# MB15NO4124	TC00820837	E022	3.882e-06	ng/ml	1575	-1.39							20220127_SR2DLT_Ab
AB01974200	01	Ainno_16251	Ainnocence	AIN1-25_AINNL0025	Lot# MB15NO4125	TC00820838	F003	7670	ng/ml	2925	0.03	>7670	Inactive	-0.79	0.79	0	40	20220127_SR2DLT_Ab
AB01974200	01	Ainno_16251	Ainnocence	AIN1-25_AINNL0025	Lot# MB15NO4125	TC00820837	F003	7670	ng/ml	2125	-0.6							20220127_SR2DLT_Ab
AB01974200	01	Ainno_16251	Ainnocence	AIN1-25_AINNL0025	Lot# MB15NO4125	TC00820838	F004	2427	ng/ml	2350	-0.76							20220127_SR2DLT_Ab
AB01974200	01	Ainno_16251	Ainnocence	AIN1-25_AINNL0025	Lot# MB15NO4125	TC00820837	F004	2427	ng/ml	3800	1.79							20220127_SR2DLT_Ab
AB01974200	01	Ainno_16251	Ainnocence	AIN1-25_AINNL0025	Lot# MB15NO4125	TC00820838	F005	768.1	ng/ml	1825	-1.48							20220127_SR2DLT_Ab
AB01974200	01	Ainno_16251	Ainnocence	AIN1-25_AINNL0025	Lot# MB15NO4125	TC00820837	F005	768.1	ng/ml	3400	1.22							20220127_SR2DLT_Ab
AB01974200	01	Ainno_16251	Ainnocence	AIN1-25_AINNL0025	Lot# MB15NO4125	TC00820838	F006	243.1	ng/ml	3000	0.13							20220127_SR2DLT_Ab
AB01974200	01	Ainno_16251	Ainnocence	AIN1-25_AINNL0025	Lot# MB15NO4125	TC00820837	F006	243.1	ng/ml	2225	-0.46							20220127_SR2DLT_Ab
AB01974200	01	Ainno_16251	Ainnocence	AIN1-25_AINNL0025	Lot# MB15NO4125	TC00820838	F007	76.92	ng/ml	2400	-0.69							20220127_SR2DLT_Ab
AB01974200	01	Ainno_16251	Ainnocence	AIN1-25_AINNL0025	Lot# MB15NO4125	TC00820837	F007	76.92	ng/ml	2725	0.26							20220127_SR2DLT_Ab
AB01974200	01	Ainno_16251	Ainnocence	AIN1-25_AINNL0025	Lot# MB15NO4125	TC00820838	F008	24.34	ng/ml	3450	0.75							20220127_SR2DLT_Ab
AB01974200	01	Ainno_16251	Ainnocence	AIN1-25_AINNL0025	Lot# MB15NO4125	TC00820837	F008	24.34	ng/ml	2200	-0.49							20220127_SR2DLT_Ab
AB01974200	01	Ainno_16251	Ainnocence	AIN1-25_AINNL0025	Lot# MB15NO4125	TC00820838	F009	7.703	ng/ml	3250	0.47							20220127_SR2DLT_Ab
AB01974200	01	Ainno_16251	Ainnocence	AIN1-25_AINNL0025	Lot# MB15NO4125	TC00820837	F009	7.703	ng/ml	2200	-0.49							20220127_SR2DLT_Ab
AB01974200	01	Ainno_16251	Ainnocence	AIN1-25_AINNL0025	Lot# MB15NO4125	TC00820838	F010	2.438	ng/ml	3050	0.2							20220127_SR2DLT_Ab
AB01974200	01	Ainno_16251	Ainnocence	AIN1-25_AINNL0025	Lot# MB15NO4125	TC00820837	F010	2.438	ng/ml	3300	1.08							20220127_SR2DLT_Ab
AB01974200	01	Ainno_16251	Ainnocence	AIN1-25_AINNL0025	Lot# MB15NO4125	TC00820838	F011	0.7714	ng/ml	3500	0.82							20220127_SR2DLT_Ab
AB01974200	01	Ainno_16251	Ainnocence	AIN1-25_AINNL0025	Lot# MB15NO4125	TC00820837	F011	0.7714	ng/ml	3225	0.97							20220127_SR2DLT_Ab
AB01974200	01	Ainno_16251	Ainnocence	AIN1-25_AINNL0025	Lot# MB15NO4125	TC00820838	F012	0.2441	ng/ml	2725	-0.25							20220127_SR2DLT_Ab
AB01974200	01	Ainno_16251	Ainnocence	AIN1-25_AINNL0025	Lot# MB15NO4125	TC00820837	F012	0.2441	ng/ml	2450	-0.14							20220127_SR2DLT_Ab
AB01974200	01	Ainno_16251	Ainnocence	AIN1-25_AINNL0025	Lot# MB15NO4125	TC00820838	F013	0.07725	ng/ml	3075	0.23							20220127_SR2DLT_Ab
AB01974200	01	Ainno_16251	Ainnocence	AIN1-25_AINNL0025	Lot# MB15NO4125	TC00820837	F013	0.07725	ng/ml	2750	0.29							20220127_SR2DLT_Ab
AB01974200	01	Ainno_16251	Ainnocence	AIN1-25_AINNL0025	Lot# MB15NO4125	TC00820838	F014	0.02445	ng/ml	2400	-0.69							20220127_SR2DLT_Ab
AB01974200	01	Ainno_16251	Ainnocence	AIN1-25_AINNL0025	Lot# MB15NO4125	TC00820837	F014	0.02445	ng/ml	2625	0.11							20220127_SR2DLT_Ab
AB01974200	01	Ainno_16251	Ainnocence	AIN1-25_AINNL0025	Lot# MB15NO4125	TC00820838	F015	0.007737	ng/ml	2625	-0.38							20220127_SR2DLT_Ab
AB01974200	01	Ainno_16251	Ainnocence	AIN1-25_AINNL0025	Lot# MB15NO4125	TC00820837	F015	0.007737	ng/ml	2325	-0.32							20220127_SR2DLT_Ab
AB01974200	01	Ainno_16251	Ainnocence	AIN1-25_AINNL0025	Lot# MB15NO4125	TC00820838	F016	0.002448	ng/ml	2900	-0.01							20220127_SR2DLT_Ab
AB01974200	01	Ainno_16251	Ainnocence	AIN1-25_AINNL0025	Lot# MB15NO4125	TC00820837	F016	0.002448	ng/ml	2325	-0.32							20220127_SR2DLT_Ab
AB01974200	01	Ainno_16251	Ainnocence	AIN1-25_AINNL0025	Lot# MB15NO4125	TC00820838	F017	0.0007748	ng/ml	2900	-0.01							20220127_SR2DLT_Ab
AB01974200	01	Ainno_16251	Ainnocence	AIN1-25_AINNL0025	Lot# MB15NO4125	TC00820837	F017	0.0007748	ng/ml	2775	0.33							20220127_SR2DLT_Ab
AB01974200	01	Ainno_16251	Ainnocence	AIN1-25_AINNL0025	Lot# MB15NO4125	TC00820838	F018	0.0002452	ng/ml	2225	-0.93							20220127_SR2DLT_Ab
AB01974200	01	Ainno_16251	Ainnocence	AIN1-25_AINNL0025	Lot# MB15NO4125	TC00820837	F018	0.0002452	ng/ml	4075	2.19							20220127_SR2DLT_Ab
AB01974200	01	Ainno_16251	Ainnocence	AIN1-25_AINNL0025	Lot# MB15NO4125	TC00820838	F019	7.759e-05	ng/ml	3275	0.51							20220127_SR2DLT_Ab
AB01974200	01	Ainno_16251	Ainnocence	AIN1-25_AINNL0025	Lot# MB15NO4125	TC00820837	F019	7.759e-05	ng/ml	2025	-0.74							20220127_SR2DLT_Ab
AB01974200	01	Ainno_16251	Ainnocence	AIN1-25_AINNL0025	Lot# MB15NO4125	TC00820838	F020	2.455e-05	ng/ml	3800	1.23							20220127_SR2DLT_Ab
AB01974200	01	Ainno_16251	Ainnocence	AIN1-25_AINNL0025	Lot# MB15NO4125	TC00820837	F020	2.455e-05	ng/ml	2150	-0.57							20220127_SR2DLT_Ab
AB01974200	01	Ainno_16251	Ainnocence	AIN1-25_AINNL0025	Lot# MB15NO4125	TC00820838	F021	7.77e-06	ng/ml	3925	1.4							20220127_SR2DLT_Ab
AB01974200	01	Ainno_16251	Ainnocence	AIN1-25_AINNL0025	Lot# MB15NO4125	TC00820837	F021	7.77e-06	ng/ml	2525	-0.03							20220127_SR2DLT_Ab
AB01974200	01	Ainno_16251	Ainnocence	AIN1-25_AINNL0025	Lot# MB15NO4125	TC00820838	F022	2.459e-06	ng/ml	3725	1.12							20220127_SR2DLT_Ab
AB01974200	01	Ainno_16251	Ainnocence	AIN1-25_AINNL0025	Lot# MB15NO4125	TC00820837	F022	2.459e-06	ng/ml	4325	2.54							20220127_SR2DLT_Ab
AB01974201	01	Ainno_16251	Ainnocence	AIN1-27_AINNL0027	Lot# MB15NO1901	TC00820838	G003	1440	ng/ml	2925	0.03	>1440	Inactive	-5.22	0.81	0	40	20220127_SR2DLT_Ab
AB01974201	01	Ainno_16251	Ainnocence	AIN1-27_AINNL0027	Lot# MB15NO1901	TC00820837	G003	1440	ng/ml	2750	0.29							20220127_SR2DLT_Ab
AB01974201	01	Ainno_16251	Ainnocence	AIN1-27_AINNL0027	Lot# MB15NO1901	TC00820838	G004	455.7	ng/ml	3225	0.44							20220127_SR2DLT_Ab
AB01974201	01	Ainno_16251	Ainnocence	AIN1-27_AINNL0027	Lot# MB15NO1901	TC00820837	G004	455.7	ng/ml	2500	-0.07							20220127_SR2DLT_Ab
AB01974201	01	Ainno_16251	Ainnocence	AIN1-27_AINNL0027	Lot# MB15NO1901	TC00820838	G005	144.2	ng/ml	2175	-1							20220127_SR2DLT_Ab
AB01974201	01	Ainno_16251	Ainnocence	AIN1-27_AINNL0027	Lot# MB15NO1901	TC00820837	G005	144.2	ng/ml	2525	-0.03							20220127_SR2DLT_Ab
AB01974201	01	Ainno_16251	Ainnocence	AIN1-27_AINNL0027	Lot# MB15NO1901	TC00820838	G006	45.64	ng/ml	2300	-0.83							20220127_SR2DLT_Ab
AB01974201	01	Ainno_16251	Ainnocence	AIN1-27_AINNL0027	Lot# MB15NO1901	TC00820837	G006	45.64	ng/ml	2100	-0.64							20220127_SR2DLT_Ab
AB01974201	01	Ainno_16251	Ainnocence	AIN1-27_AINNL0027	Lot# MB15NO1901	TC00820838	G007	14.44	ng/ml	2825	-0.11							20220127_SR2DLT_Ab
AB01974201	01	Ainno_16251	Ainnocence	AIN1-27_AINNL0027	Lot# MB15NO1901	TC00820837	G007	14.44	ng/ml	2900	0.51							20220127_SR2DLT_Ab
AB01974201	01	Ainno_16251	Ainnocence	AIN1-27_AINNL0027	Lot# MB15NO1901	TC00820838	G008	4.57	ng/ml	2925	0.03							20220127_SR2DLT_Ab
AB01974201	01	Ainno_16251	Ainnocence	AIN1-27_AINNL0027	Lot# MB15NO1901	TC00820837	G008	4.57	ng/ml	1750	-1.14							20220127_SR2DLT_Ab
AB01974201	01	Ainno_16251	Ainnocence	AIN1-27_AINNL0027	Lot# MB15NO1901	TC00820838	G009	1.446	ng/ml	2650	-0.35							20220127_SR2DLT_Ab
AB01974201	01	Ainno_16251	Ainnocence	AIN1-27_AINNL0027	Lot# MB15NO1901	TC00820837	G009	1.446	ng/ml	2175	-0.53							20220127_SR2DLT_Ab
AB01974201	01	Ainno_16251	Ainnocence	AIN1-27_AINNL0027	Lot# MB15NO1901	TC00820838	G010	0.4577	ng/ml	2100	-1.1							20220127_SR2DLT_Ab
AB01974201	01	Ainno_16251	Ainnocence	AIN1-27_AINNL0027	Lot# MB15NO1901	TC00820837	G010	0.4577	ng/ml	2700	0.22							20220127_SR2DLT_Ab
AB01974201	01	Ainno_16251	Ainnocence	AIN1-27_AINNL0027	Lot# MB15NO1901	TC00820838	G011	0.1448	ng/ml	2250	-0.9							20220127_SR2DLT_Ab
AB01974201	01	Ainno_16251	Ainnocence	AIN1-27_AINNL0027	Lot# MB15NO1901	TC00820837	G011	0.1448	ng/ml	1675	-1.25							20220127_SR2DLT_Ab
AB01974201	01	Ainno_16251	Ainnocence	AIN1-27_AINNL0027	Lot# MB15NO1901	TC00820838	G012	0.04583	ng/ml	4675	2.43							20220127_SR2DLT_Ab
AB01974201	01	Ainno_16251	Ainnocence	AIN1-27_AINNL0027	Lot# MB15NO1901	TC00820837	G012	0.04583	ng/ml	2725	0.26							20220127_SR2DLT_Ab
AB01974201	01	Ainno_16251	Ainnocence	AIN1-27_AINNL0027	Lot# MB15NO1901	TC00820838	G013	0.0145	ng/ml	2675	-0.31							20220127_SR2DLT_Ab
AB01974201	01	Ainno_16251	Ainnocence	AIN1-27_AINNL0027	Lot# MB15NO1901	TC00820837	G013	0.0145	ng/ml	2800	0.36							20220127_SR2DLT_Ab
AB01974201	01	Ainno_16251	Ainnocence	AIN1-27_AINNL0027	Lot# MB15NO1901	TC00820838	G014	0.00459	ng/ml	3125	0.3							20220127_SR2DLT_Ab
AB01974201	01	Ainno_16251	Ainnocence	AIN1-27_AINNL0027	Lot# MB15NO1901	TC00820837	G014	0.00459	ng/ml	2425	-0.17							20220127_SR2DLT_Ab
AB01974201	01	Ainno_16251	Ainnocence	AIN1-27_AINNL0027	Lot# MB15NO1901	TC00820838	G015	0.001453	ng/ml	4000	1.5							20220127_SR2DLT_Ab
AB01974201	01	Ainno_16251	Ainnocence	AIN1-27_AINNL0027	Lot# MB15NO1901	TC00820837	G015	0.001453	ng/ml	3350	1.15							20220127_SR2DLT_Ab
AB01974201	01	Ainno_16251	Ainnocence	AIN1-27_AINNL0027	Lot# MB15NO1901	TC00820838	G016	0.0004597	ng/ml	2575	-0.45							20220127_SR2DLT_Ab
AB01974201	01	Ainno_16251	Ainnocence	AIN1-27_AINNL0027	Lot# MB15NO1901	TC00820837	G016	0.0004597	ng/ml	3225	0.97							20220127_SR2DLT_Ab
AB01974201	01	Ainno_16251	Ainnocence	AIN1-27_AINNL0027	Lot# MB15NO1901	TC00820838	G017	0.0001455	ng/ml	2525	-0.52							20220127_SR2DLT_Ab
AB01974201	01	Ainno_16251	Ainnocence	AIN1-27_AINNL0027	Lot# MB15NO1901	TC00820837	G017	0.0001455	ng/ml	2625	0.11							20220127_SR2DLT_Ab
AB01974201	01	Ainno_16251	Ainnocence	AIN1-27_AINNL0027	Lot# MB15NO1901	TC00820838	G018	4.603e-05	ng/ml	3725	1.12							20220127_SR2DLT_Ab
AB01974201	01	Ainno_16251	Ainnocence	AIN1-27_AINNL0027	Lot# MB15NO1901	TC00820837	G018	4.603e-05	ng/ml	2650	0.15							20220127_SR2DLT_Ab
AB01974201	01	Ainno_16251	Ainnocence	AIN1-27_AINNL0027	Lot# MB15NO1901	TC00820838	G019	1.457e-05	ng/ml	4150	1.71							20220127_SR2DLT_Ab
AB01974201	01	Ainno_16251	Ainnocence	AIN1-27_AINNL0027	Lot# MB15NO1901	TC00820837	G019	1.457e-05	ng/ml	2325	-0.32							20220127_SR2DLT_Ab
AB01974201	01	Ainno_16251	Ainnocence	AIN1-27_AINNL0027	Lot# MB15NO1901	TC00820838	G020	4.61e-06	ng/ml	3050	0.2							20220127_SR2DLT_Ab
AB01974201	01	Ainno_16251	Ainnocence	AIN1-27_AINNL0027	Lot# MB15NO1901	TC00820837	G020	4.61e-06	ng/ml	2700	0.22							20220127_SR2DLT_Ab
AB01974201	01	Ainno_16251	Ainnocence	AIN1-27_AINNL0027	Lot# MB15NO1901	TC00820838	G021	1.459e-06	ng/ml	3050	0.2							20220127_SR2DLT_Ab
AB01974201	01	Ainno_16251	Ainnocence	AIN1-27_AINNL0027	Lot# MB15NO1901	TC00820837	G021	1.459e-06	ng/ml	2300	-0.35							20220127_SR2DLT_Ab
AB01974201	01	Ainno_16251	Ainnocence	AIN1-27_AINNL0027	Lot# MB15NO1901	TC00820838	G022	4.616e-07	ng/ml	4625	2.36							20220127_SR2DLT_Ab
AB01974201	01	Ainno_16251	Ainnocence	AIN1-27_AINNL0027	Lot# MB15NO1901	TC00820837	G022	4.616e-07	ng/ml	3175	0.9							20220127_SR2DLT_Ab
AB01974202	01	Ainno_16251	Ainnocence	AIN1-34_AINNL0034	Lot# MB15NO1902	TC00820838	H003	2560	ng/ml	3375	0.64	>2560	Inactive	-0.19	0.82	0	40	20220127_SR2DLT_Ab
AB01974202	01	Ainno_16251	Ainnocence	AIN1-34_AINNL0034	Lot# MB15NO1902	TC00820837	H003	2560	ng/ml	3050	0.72							20220127_SR2DLT_Ab
AB01974202	01	Ainno_16251	Ainnocence	AIN1-34_AINNL0034	Lot# MB15NO1902	TC00820838	H004	810.1	ng/ml	2900	-0.01							20220127_SR2DLT_Ab
AB01974202	01	Ainno_16251	Ainnocence	AIN1-34_AINNL0034	Lot# MB15NO1902	TC00820837	H004	810.1	ng/ml	2075	-0.67							20220127_SR2DLT_Ab
AB01974202	01	Ainno_16251	Ainnocence	AIN1-34_AINNL0034	Lot# MB15NO1902	TC00820838	H005	256.4	ng/ml	2175	-1							20220127_SR2DLT_Ab
AB01974202	01	Ainno_16251	Ainnocence	AIN1-34_AINNL0034	Lot# MB15NO1902	TC00820837	H005	256.4	ng/ml	3250	1.01							20220127_SR2DLT_Ab
AB01974202	01	Ainno_16251	Ainnocence	AIN1-34_AINNL0034	Lot# MB15NO1902	TC00820838	H006	81.13	ng/ml	3000	0.13							20220127_SR2DLT_Ab
AB01974202	01	Ainno_16251	Ainnocence	AIN1-34_AINNL0034	Lot# MB15NO1902	TC00820837	H006	81.13	ng/ml	2400	-0.21							20220127_SR2DLT_Ab
AB01974202	01	Ainno_16251	Ainnocence	AIN1-34_AINNL0034	Lot# MB15NO1902	TC00820838	H007	25.67	ng/ml	3825	1.26							20220127_SR2DLT_Ab
AB01974202	01	Ainno_16251	Ainnocence	AIN1-34_AINNL0034	Lot# MB15NO1902	TC00820837	H007	25.67	ng/ml	2900	0.51							20220127_SR2DLT_Ab
AB01974202	01	Ainno_16251	Ainnocence	AIN1-34_AINNL0034	Lot# MB15NO1902	TC00820838	H008	8.125	ng/ml	2925	0.03							20220127_SR2DLT_Ab
AB01974202	01	Ainno_16251	Ainnocence	AIN1-34_AINNL0034	Lot# MB15NO1902	TC00820837	H008	8.125	ng/ml	2875	0.47							20220127_SR2DLT_Ab
AB01974202	01	Ainno_16251	Ainnocence	AIN1-34_AINNL0034	Lot# MB15NO1902	TC00820838	H009	2.571	ng/ml	2375	-0.73							20220127_SR2DLT_Ab
AB01974202	01	Ainno_16251	Ainnocence	AIN1-34_AINNL0034	Lot# MB15NO1902	TC00820837	H009	2.571	ng/ml	2975	0.61							20220127_SR2DLT_Ab
AB01974202	01	Ainno_16251	Ainnocence	AIN1-34_AINNL0034	Lot# MB15NO1902	TC00820838	H010	0.8136	ng/ml	2875	-0.04							20220127_SR2DLT_Ab
AB01974202	01	Ainno_16251	Ainnocence	AIN1-34_AINNL0034	Lot# MB15NO1902	TC00820837	H010	0.8136	ng/ml	2325	-0.32							20220127_SR2DLT_Ab
AB01974202	01	Ainno_16251	Ainnocence	AIN1-34_AINNL0034	Lot# MB15NO1902	TC00820838	H011	0.2575	ng/ml	3450	0.75							20220127_SR2DLT_Ab
AB01974202	01	Ainno_16251	Ainnocence	AIN1-34_AINNL0034	Lot# MB15NO1902	TC00820837	H011	0.2575	ng/ml	2750	0.29							20220127_SR2DLT_Ab
AB01974202	01	Ainno_16251	Ainnocence	AIN1-34_AINNL0034	Lot# MB15NO1902	TC00820838	H012	0.08148	ng/ml	2750	-0.21							20220127_SR2DLT_Ab
AB01974202	01	Ainno_16251	Ainnocence	AIN1-34_AINNL0034	Lot# MB15NO1902	TC00820837	H012	0.08148	ng/ml	3050	0.72							20220127_SR2DLT_Ab
AB01974202	01	Ainno_16251	Ainnocence	AIN1-34_AINNL0034	Lot# MB15NO1902	TC00820838	H013	0.02579	ng/ml	3250	0.47							20220127_SR2DLT_Ab
AB01974202	01	Ainno_16251	Ainnocence	AIN1-34_AINNL0034	Lot# MB15NO1902	TC00820837	H013	0.02579	ng/ml	2775	0.33							20220127_SR2DLT_Ab
AB01974202	01	Ainno_16251	Ainnocence	AIN1-34_AINNL0034	Lot# MB15NO1902	TC00820838	H014	0.00816	ng/ml	4475	2.15							20220127_SR2DLT_Ab
AB01974202	01	Ainno_16251	Ainnocence	AIN1-34_AINNL0034	Lot# MB15NO1902	TC00820837	H014	0.00816	ng/ml	3525	1.4							20220127_SR2DLT_Ab
AB01974202	01	Ainno_16251	Ainnocence	AIN1-34_AINNL0034	Lot# MB15NO1902	TC00820838	H015	0.002582	ng/ml	4250	1.84							20220127_SR2DLT_Ab
AB01974202	01	Ainno_16251	Ainnocence	AIN1-34_AINNL0034	Lot# MB15NO1902	TC00820837	H015	0.002582	ng/ml	2950	0.58							20220127_SR2DLT_Ab
AB01974202	01	Ainno_16251	Ainnocence	AIN1-34_AINNL0034	Lot# MB15NO1902	TC00820838	H016	0.0008172	ng/ml	2625	-0.38							20220127_SR2DLT_Ab
AB01974202	01	Ainno_16251	Ainnocence	AIN1-34_AINNL0034	Lot# MB15NO1902	TC00820837	H016	0.0008172	ng/ml	3725	1.69							20220127_SR2DLT_Ab
AB01974202	01	Ainno_16251	Ainnocence	AIN1-34_AINNL0034	Lot# MB15NO1902	TC00820838	H017	0.0002586	ng/ml	3975	1.47							20220127_SR2DLT_Ab
AB01974202	01	Ainno_16251	Ainnocence	AIN1-34_AINNL0034	Lot# MB15NO1902	TC00820837	H017	0.0002586	ng/ml	2875	0.47							20220127_SR2DLT_Ab
AB01974202	01	Ainno_16251	Ainnocence	AIN1-34_AINNL0034	Lot# MB15NO1902	TC00820838	H018	8.183e-05	ng/ml	3425	0.71							20220127_SR2DLT_Ab
AB01974202	01	Ainno_16251	Ainnocence	AIN1-34_AINNL0034	Lot# MB15NO1902	TC00820837	H018	8.183e-05	ng/ml	4250	2.44							20220127_SR2DLT_Ab
AB01974202	01	Ainno_16251	Ainnocence	AIN1-34_AINNL0034	Lot# MB15NO1902	TC00820838	H019	2.59e-05	ng/ml	3150	0.34							20220127_SR2DLT_Ab
AB01974202	01	Ainno_16251	Ainnocence	AIN1-34_AINNL0034	Lot# MB15NO1902	TC00820837	H019	2.59e-05	ng/ml	3925	1.97							20220127_SR2DLT_Ab
AB01974202	01	Ainno_16251	Ainnocence	AIN1-34_AINNL0034	Lot# MB15NO1902	TC00820838	H020	8.195e-06	ng/ml	2825	-0.11							20220127_SR2DLT_Ab
AB01974202	01	Ainno_16251	Ainnocence	AIN1-34_AINNL0034	Lot# MB15NO1902	TC00820837	H020	8.195e-06	ng/ml	3550	1.44							20220127_SR2DLT_Ab
AB01974202	01	Ainno_16251	Ainnocence	AIN1-34_AINNL0034	Lot# MB15NO1902	TC00820838	H021	2.593e-06	ng/ml	3400	0.68							20220127_SR2DLT_Ab
AB01974202	01	Ainno_16251	Ainnocence	AIN1-34_AINNL0034	Lot# MB15NO1902	TC00820837	H021	2.593e-06	ng/ml	3750	1.72							20220127_SR2DLT_Ab
AB01974202	01	Ainno_16251	Ainnocence	AIN1-34_AINNL0034	Lot# MB15NO1902	TC00820838	H022	8.207e-07	ng/ml	3375	0.64							20220127_SR2DLT_Ab
AB01974202	01	Ainno_16251	Ainnocence	AIN1-34_AINNL0034	Lot# MB15NO1902	TC00820837	H022	8.207e-07	ng/ml	3150	0.86							20220127_SR2DLT_Ab
AB01974203	01	Ainno_16251	Ainnocence	AIN1-35_AINNL0035	Lot# MB15NO1903	TC00820838	I003	2330	ng/ml	2275	-0.86	>2330	Inactive	-0.3	0.77	0	40	20220127_SR2DLT_Ab
AB01974203	01	Ainno_16251	Ainnocence	AIN1-35_AINNL0035	Lot# MB15NO1903	TC00820837	I003	2330	ng/ml	1850	-1							20220127_SR2DLT_Ab
AB01974203	01	Ainno_16251	Ainnocence	AIN1-35_AINNL0035	Lot# MB15NO1903	TC00820838	I004	737.3	ng/ml	2375	-0.73							20220127_SR2DLT_Ab
AB01974203	01	Ainno_16251	Ainnocence	AIN1-35_AINNL0035	Lot# MB15NO1903	TC00820837	I004	737.3	ng/ml	2150	-0.57							20220127_SR2DLT_Ab
AB01974203	01	Ainno_16251	Ainnocence	AIN1-35_AINNL0035	Lot# MB15NO1903	TC00820838	I005	233.3	ng/ml	2275	-0.86							20220127_SR2DLT_Ab
AB01974203	01	Ainno_16251	Ainnocence	AIN1-35_AINNL0035	Lot# MB15NO1903	TC00820837	I005	233.3	ng/ml	2150	-0.57							20220127_SR2DLT_Ab
AB01974203	01	Ainno_16251	Ainnocence	AIN1-35_AINNL0035	Lot# MB15NO1903	TC00820838	I006	73.84	ng/ml	2975	0.1							20220127_SR2DLT_Ab
AB01974203	01	Ainno_16251	Ainnocence	AIN1-35_AINNL0035	Lot# MB15NO1903	TC00820837	I006	73.84	ng/ml	1750	-1.14							20220127_SR2DLT_Ab
AB01974203	01	Ainno_16251	Ainnocence	AIN1-35_AINNL0035	Lot# MB15NO1903	TC00820838	I007	23.37	ng/ml	3150	0.34							20220127_SR2DLT_Ab
AB01974203	01	Ainno_16251	Ainnocence	AIN1-35_AINNL0035	Lot# MB15NO1903	TC00820837	I007	23.37	ng/ml	3500	1.36							20220127_SR2DLT_Ab
AB01974203	01	Ainno_16251	Ainnocence	AIN1-35_AINNL0035	Lot# MB15NO1903	TC00820838	I008	7.395	ng/ml	2500	-0.55							20220127_SR2DLT_Ab
AB01974203	01	Ainno_16251	Ainnocence	AIN1-35_AINNL0035	Lot# MB15NO1903	TC00820837	I008	7.395	ng/ml	2675	0.18							20220127_SR2DLT_Ab
AB01974203	01	Ainno_16251	Ainnocence	AIN1-35_AINNL0035	Lot# MB15NO1903	TC00820838	I009	2.34	ng/ml	3200	0.4							20220127_SR2DLT_Ab
AB01974203	01	Ainno_16251	Ainnocence	AIN1-35_AINNL0035	Lot# MB15NO1903	TC00820837	I009	2.34	ng/ml	2550	0.01							20220127_SR2DLT_Ab
AB01974203	01	Ainno_16251	Ainnocence	AIN1-35_AINNL0035	Lot# MB15NO1903	TC00820838	I010	0.7405	ng/ml	2900	-0.01							20220127_SR2DLT_Ab
AB01974203	01	Ainno_16251	Ainnocence	AIN1-35_AINNL0035	Lot# MB15NO1903	TC00820837	I010	0.7405	ng/ml	2300	-0.35							20220127_SR2DLT_Ab
AB01974203	01	Ainno_16251	Ainnocence	AIN1-35_AINNL0035	Lot# MB15NO1903	TC00820838	I011	0.2343	ng/ml	2625	-0.38							20220127_SR2DLT_Ab
AB01974203	01	Ainno_16251	Ainnocence	AIN1-35_AINNL0035	Lot# MB15NO1903	TC00820837	I011	0.2343	ng/ml	2100	-0.64							20220127_SR2DLT_Ab
AB01974203	01	Ainno_16251	Ainnocence	AIN1-35_AINNL0035	Lot# MB15NO1903	TC00820838	I012	0.07416	ng/ml	2875	-0.04							20220127_SR2DLT_Ab
AB01974203	01	Ainno_16251	Ainnocence	AIN1-35_AINNL0035	Lot# MB15NO1903	TC00820837	I012	0.07416	ng/ml	2775	0.33							20220127_SR2DLT_Ab
AB01974203	01	Ainno_16251	Ainnocence	AIN1-35_AINNL0035	Lot# MB15NO1903	TC00820838	I013	0.02347	ng/ml	3675	1.06							20220127_SR2DLT_Ab
AB01974203	01	Ainno_16251	Ainnocence	AIN1-35_AINNL0035	Lot# MB15NO1903	TC00820837	I013	0.02347	ng/ml	1900	-0.92							20220127_SR2DLT_Ab
AB01974203	01	Ainno_16251	Ainnocence	AIN1-35_AINNL0035	Lot# MB15NO1903	TC00820838	I014	0.007427	ng/ml	2925	0.03							20220127_SR2DLT_Ab
AB01974203	01	Ainno_16251	Ainnocence	AIN1-35_AINNL0035	Lot# MB15NO1903	TC00820837	I014	0.007427	ng/ml	2375	-0.24							20220127_SR2DLT_Ab
AB01974203	01	Ainno_16251	Ainnocence	AIN1-35_AINNL0035	Lot# MB15NO1903	TC00820838	I015	0.00235	ng/ml	2900	-0.01							20220127_SR2DLT_Ab
AB01974203	01	Ainno_16251	Ainnocence	AIN1-35_AINNL0035	Lot# MB15NO1903	TC00820837	I015	0.00235	ng/ml	4025	2.11							20220127_SR2DLT_Ab
AB01974203	01	Ainno_16251	Ainnocence	AIN1-35_AINNL0035	Lot# MB15NO1903	TC00820838	I016	0.0007437	ng/ml	2325	-0.79							20220127_SR2DLT_Ab
AB01974203	01	Ainno_16251	Ainnocence	AIN1-35_AINNL0035	Lot# MB15NO1903	TC00820837	I016	0.0007437	ng/ml	2375	-0.24							20220127_SR2DLT_Ab
AB01974203	01	Ainno_16251	Ainnocence	AIN1-35_AINNL0035	Lot# MB15NO1903	TC00820838	I017	0.0002354	ng/ml	2425	-0.66							20220127_SR2DLT_Ab
AB01974203	01	Ainno_16251	Ainnocence	AIN1-35_AINNL0035	Lot# MB15NO1903	TC00820837	I017	0.0002354	ng/ml	2350	-0.28							20220127_SR2DLT_Ab
AB01974203	01	Ainno_16251	Ainnocence	AIN1-35_AINNL0035	Lot# MB15NO1903	TC00820838	I018	7.448e-05	ng/ml	3325	0.58							20220127_SR2DLT_Ab
AB01974203	01	Ainno_16251	Ainnocence	AIN1-35_AINNL0035	Lot# MB15NO1903	TC00820837	I018	7.448e-05	ng/ml	2700	0.22							20220127_SR2DLT_Ab
AB01974203	01	Ainno_16251	Ainnocence	AIN1-35_AINNL0035	Lot# MB15NO1903	TC00820838	I019	2.357e-05	ng/ml	3750	1.16							20220127_SR2DLT_Ab
AB01974203	01	Ainno_16251	Ainnocence	AIN1-35_AINNL0035	Lot# MB15NO1903	TC00820837	I019	2.357e-05	ng/ml	1950	-0.85							20220127_SR2DLT_Ab
AB01974203	01	Ainno_16251	Ainnocence	AIN1-35_AINNL0035	Lot# MB15NO1903	TC00820838	I020	7.459e-06	ng/ml	4125	1.67							20220127_SR2DLT_Ab
AB01974203	01	Ainno_16251	Ainnocence	AIN1-35_AINNL0035	Lot# MB15NO1903	TC00820837	I020	7.459e-06	ng/ml	3425	1.26							20220127_SR2DLT_Ab
AB01974203	01	Ainno_16251	Ainnocence	AIN1-35_AINNL0035	Lot# MB15NO1903	TC00820838	I021	2.36e-06	ng/ml	3475	0.78							20220127_SR2DLT_Ab
AB01974203	01	Ainno_16251	Ainnocence	AIN1-35_AINNL0035	Lot# MB15NO1903	TC00820837	I021	2.36e-06	ng/ml	2825	0.4							20220127_SR2DLT_Ab
AB01974203	01	Ainno_16251	Ainnocence	AIN1-35_AINNL0035	Lot# MB15NO1903	TC00820838	I022	7.47e-07	ng/ml	2650	-0.35							20220127_SR2DLT_Ab
AB01974203	01	Ainno_16251	Ainnocence	AIN1-35_AINNL0035	Lot# MB15NO1903	TC00820837	I022	7.47e-07	ng/ml	2600	0.08							20220127_SR2DLT_Ab
AB01974204	01	Ainno_16251	Ainnocence	AIN1-37_AINNL0037	Lot# MB15NO1904	TC00820838	J003	2110	ng/ml	2675	-0.31	>2110	Inactive	-0.3	0.7	0	40	20220127_SR2DLT_Ab
AB01974204	01	Ainno_16251	Ainnocence	AIN1-37_AINNL0037	Lot# MB15NO1904	TC00820837	J003	2110	ng/ml	1875	-0.96							20220127_SR2DLT_Ab
AB01974204	01	Ainno_16251	Ainnocence	AIN1-37_AINNL0037	Lot# MB15NO1904	TC00820838	J004	667.7	ng/ml	2300	-0.83							20220127_SR2DLT_Ab
AB01974204	01	Ainno_16251	Ainnocence	AIN1-37_AINNL0037	Lot# MB15NO1904	TC00820837	J004	667.7	ng/ml	2475	-0.1							20220127_SR2DLT_Ab
AB01974204	01	Ainno_16251	Ainnocence	AIN1-37_AINNL0037	Lot# MB15NO1904	TC00820838	J005	211.3	ng/ml	3100	0.27							20220127_SR2DLT_Ab
AB01974204	01	Ainno_16251	Ainnocence	AIN1-37_AINNL0037	Lot# MB15NO1904	TC00820837	J005	211.3	ng/ml	2100	-0.64							20220127_SR2DLT_Ab
AB01974204	01	Ainno_16251	Ainnocence	AIN1-37_AINNL0037	Lot# MB15NO1904	TC00820838	J006	66.87	ng/ml	2200	-0.97							20220127_SR2DLT_Ab
AB01974204	01	Ainno_16251	Ainnocence	AIN1-37_AINNL0037	Lot# MB15NO1904	TC00820837	J006	66.87	ng/ml	2425	-0.17							20220127_SR2DLT_Ab
AB01974204	01	Ainno_16251	Ainnocence	AIN1-37_AINNL0037	Lot# MB15NO1904	TC00820838	J007	21.16	ng/ml	2875	-0.04							20220127_SR2DLT_Ab
AB01974204	01	Ainno_16251	Ainnocence	AIN1-37_AINNL0037	Lot# MB15NO1904	TC00820837	J007	21.16	ng/ml	2350	-0.28							20220127_SR2DLT_Ab
AB01974204	01	Ainno_16251	Ainnocence	AIN1-37_AINNL0037	Lot# MB15NO1904	TC00820838	J008	6.696	ng/ml	2700	-0.28							20220127_SR2DLT_Ab
AB01974204	01	Ainno_16251	Ainnocence	AIN1-37_AINNL0037	Lot# MB15NO1904	TC00820837	J008	6.696	ng/ml	2775	0.33							20220127_SR2DLT_Ab
AB01974204	01	Ainno_16251	Ainnocence	AIN1-37_AINNL0037	Lot# MB15NO1904	TC00820838	J009	2.119	ng/ml	2600	-0.42							20220127_SR2DLT_Ab
AB01974204	01	Ainno_16251	Ainnocence	AIN1-37_AINNL0037	Lot# MB15NO1904	TC00820837	J009	2.119	ng/ml	2325	-0.32							20220127_SR2DLT_Ab
AB01974204	01	Ainno_16251	Ainnocence	AIN1-37_AINNL0037	Lot# MB15NO1904	TC00820838	J010	0.6706	ng/ml	2950	0.06							20220127_SR2DLT_Ab
AB01974204	01	Ainno_16251	Ainnocence	AIN1-37_AINNL0037	Lot# MB15NO1904	TC00820837	J010	0.6706	ng/ml	2300	-0.35							20220127_SR2DLT_Ab
AB01974204	01	Ainno_16251	Ainnocence	AIN1-37_AINNL0037	Lot# MB15NO1904	TC00820838	J011	0.2122	ng/ml	3575	0.92							20220127_SR2DLT_Ab
AB01974204	01	Ainno_16251	Ainnocence	AIN1-37_AINNL0037	Lot# MB15NO1904	TC00820837	J011	0.2122	ng/ml	3325	1.11							20220127_SR2DLT_Ab
AB01974204	01	Ainno_16251	Ainnocence	AIN1-37_AINNL0037	Lot# MB15NO1904	TC00820838	J012	0.06716	ng/ml	2275	-0.86							20220127_SR2DLT_Ab
AB01974204	01	Ainno_16251	Ainnocence	AIN1-37_AINNL0037	Lot# MB15NO1904	TC00820837	J012	0.06716	ng/ml	3075	0.76							20220127_SR2DLT_Ab
AB01974204	01	Ainno_16251	Ainnocence	AIN1-37_AINNL0037	Lot# MB15NO1904	TC00820838	J013	0.02125	ng/ml	3500	0.82							20220127_SR2DLT_Ab
AB01974204	01	Ainno_16251	Ainnocence	AIN1-37_AINNL0037	Lot# MB15NO1904	TC00820837	J013	0.02125	ng/ml	1875	-0.96							20220127_SR2DLT_Ab
AB01974204	01	Ainno_16251	Ainnocence	AIN1-37_AINNL0037	Lot# MB15NO1904	TC00820838	J014	0.006725	ng/ml	2975	0.1							20220127_SR2DLT_Ab
AB01974204	01	Ainno_16251	Ainnocence	AIN1-37_AINNL0037	Lot# MB15NO1904	TC00820837	J014	0.006725	ng/ml	2300	-0.35							20220127_SR2DLT_Ab
AB01974204	01	Ainno_16251	Ainnocence	AIN1-37_AINNL0037	Lot# MB15NO1904	TC00820838	J015	0.002128	ng/ml	2525	-0.52							20220127_SR2DLT_Ab
AB01974204	01	Ainno_16251	Ainnocence	AIN1-37_AINNL0037	Lot# MB15NO1904	TC00820837	J015	0.002128	ng/ml	3500	1.36							20220127_SR2DLT_Ab
AB01974204	01	Ainno_16251	Ainnocence	AIN1-37_AINNL0037	Lot# MB15NO1904	TC00820838	J016	0.0006735	ng/ml	2800	-0.14							20220127_SR2DLT_Ab
AB01974204	01	Ainno_16251	Ainnocence	AIN1-37_AINNL0037	Lot# MB15NO1904	TC00820837	J016	0.0006735	ng/ml	2700	0.22							20220127_SR2DLT_Ab
AB01974204	01	Ainno_16251	Ainnocence	AIN1-37_AINNL0037	Lot# MB15NO1904	TC00820838	J017	0.0002131	ng/ml	2500	-0.55							20220127_SR2DLT_Ab
AB01974204	01	Ainno_16251	Ainnocence	AIN1-37_AINNL0037	Lot# MB15NO1904	TC00820837	J017	0.0002131	ng/ml	3075	0.76							20220127_SR2DLT_Ab
AB01974204	01	Ainno_16251	Ainnocence	AIN1-37_AINNL0037	Lot# MB15NO1904	TC00820838	J018	6.745e-05	ng/ml	2625	-0.38							20220127_SR2DLT_Ab
AB01974204	01	Ainno_16251	Ainnocence	AIN1-37_AINNL0037	Lot# MB15NO1904	TC00820837	J018	6.745e-05	ng/ml	3050	0.72							20220127_SR2DLT_Ab
AB01974204	01	Ainno_16251	Ainnocence	AIN1-37_AINNL0037	Lot# MB15NO1904	TC00820838	J019	2.134e-05	ng/ml	3025	0.16							20220127_SR2DLT_Ab
AB01974204	01	Ainno_16251	Ainnocence	AIN1-37_AINNL0037	Lot# MB15NO1904	TC00820837	J019	2.134e-05	ng/ml	2900	0.51							20220127_SR2DLT_Ab
AB01974204	01	Ainno_16251	Ainnocence	AIN1-37_AINNL0037	Lot# MB15NO1904	TC00820838	J020	6.755e-06	ng/ml	3550	0.88							20220127_SR2DLT_Ab
AB01974204	01	Ainno_16251	Ainnocence	AIN1-37_AINNL0037	Lot# MB15NO1904	TC00820837	J020	6.755e-06	ng/ml	2350	-0.28							20220127_SR2DLT_Ab
AB01974204	01	Ainno_16251	Ainnocence	AIN1-37_AINNL0037	Lot# MB15NO1904	TC00820838	J021	2.138e-06	ng/ml	4425	2.08							20220127_SR2DLT_Ab
AB01974204	01	Ainno_16251	Ainnocence	AIN1-37_AINNL0037	Lot# MB15NO1904	TC00820837	J021	2.138e-06	ng/ml	3675	1.61							20220127_SR2DLT_Ab
AB01974204	01	Ainno_16251	Ainnocence	AIN1-37_AINNL0037	Lot# MB15NO1904	TC00820838	J022	6.764e-07	ng/ml	2700	-0.28							20220127_SR2DLT_Ab
AB01974204	01	Ainno_16251	Ainnocence	AIN1-37_AINNL0037	Lot# MB15NO1904	TC00820837	J022	6.764e-07	ng/ml	2400	-0.21							20220127_SR2DLT_Ab
AB01974205	01	Ainno_16251	Ainnocence	AIN1-43_AINNL0043	Lot# MB15NO4143	TC00820838	K003	12330	ng/ml	83775	110.85	196.18	Active	2.94	8.66	21.86	40	20220127_SR2DLT_Ab
AB01974205	01	Ainno_16251	Ainnocence	AIN1-43_AINNL0043	Lot# MB15NO4143	TC00820837	K003	12330	ng/ml	72800	100.42							20220127_SR2DLT_Ab
AB01974205	01	Ainno_16251	Ainnocence	AIN1-43_AINNL0043	Lot# MB15NO4143	TC00820838	K004	3902	ng/ml	77275	101.94							20220127_SR2DLT_Ab
AB01974205	01	Ainno_16251	Ainnocence	AIN1-43_AINNL0043	Lot# MB15NO4143	TC00820837	K004	3902	ng/ml	74950	103.5							20220127_SR2DLT_Ab
AB01974205	01	Ainno_16251	Ainnocence	AIN1-43_AINNL0043	Lot# MB15NO4143	TC00820838	K005	1235	ng/ml	92800	123.23							20220127_SR2DLT_Ab
AB01974205	01	Ainno_16251	Ainnocence	AIN1-43_AINNL0043	Lot# MB15NO4143	TC00820837	K005	1235	ng/ml	86550	120.08							20220127_SR2DLT_Ab
AB01974205	01	Ainno_16251	Ainnocence	AIN1-43_AINNL0043	Lot# MB15NO4143	TC00820838	K006	390.8	ng/ml	87275	115.65							20220127_SR2DLT_Ab
AB01974205	01	Ainno_16251	Ainnocence	AIN1-43_AINNL0043	Lot# MB15NO4143	TC00820837	K006	390.8	ng/ml	43025	57.86							20220127_SR2DLT_Ab
AB01974205	01	Ainno_16251	Ainnocence	AIN1-43_AINNL0043	Lot# MB15NO4143	TC00820838	K007	123.7	ng/ml	18825	21.82							20220127_SR2DLT_Ab
AB01974205	01	Ainno_16251	Ainnocence	AIN1-43_AINNL0043	Lot# MB15NO4143	TC00820837	K007	123.7	ng/ml	16275	19.62							20220127_SR2DLT_Ab
AB01974205	01	Ainno_16251	Ainnocence	AIN1-43_AINNL0043	Lot# MB15NO4143	TC00820838	K008	39.13	ng/ml	7375	6.13							20220127_SR2DLT_Ab
AB01974205	01	Ainno_16251	Ainnocence	AIN1-43_AINNL0043	Lot# MB15NO4143	TC00820837	K008	39.13	ng/ml	3900	1.94							20220127_SR2DLT_Ab
AB01974205	01	Ainno_16251	Ainnocence	AIN1-43_AINNL0043	Lot# MB15NO4143	TC00820838	K009	12.38	ng/ml	2925	0.03							20220127_SR2DLT_Ab
AB01974205	01	Ainno_16251	Ainnocence	AIN1-43_AINNL0043	Lot# MB15NO4143	TC00820837	K009	12.38	ng/ml	4050	2.15							20220127_SR2DLT_Ab
AB01974205	01	Ainno_16251	Ainnocence	AIN1-43_AINNL0043	Lot# MB15NO4143	TC00820838	K010	3.919	ng/ml	3725	1.12							20220127_SR2DLT_Ab
AB01974205	01	Ainno_16251	Ainnocence	AIN1-43_AINNL0043	Lot# MB15NO4143	TC00820837	K010	3.919	ng/ml	3075	0.76							20220127_SR2DLT_Ab
AB01974205	01	Ainno_16251	Ainnocence	AIN1-43_AINNL0043	Lot# MB15NO4143	TC00820838	K011	1.24	ng/ml	4700	2.46							20220127_SR2DLT_Ab
AB01974205	01	Ainno_16251	Ainnocence	AIN1-43_AINNL0043	Lot# MB15NO4143	TC00820837	K011	1.24	ng/ml	2650	0.15							20220127_SR2DLT_Ab
AB01974205	01	Ainno_16251	Ainnocence	AIN1-43_AINNL0043	Lot# MB15NO4143	TC00820838	K012	0.3924	ng/ml	3775	1.19							20220127_SR2DLT_Ab
AB01974205	01	Ainno_16251	Ainnocence	AIN1-43_AINNL0043	Lot# MB15NO4143	TC00820837	K012	0.3924	ng/ml	3625	1.54							20220127_SR2DLT_Ab
AB01974205	01	Ainno_16251	Ainnocence	AIN1-43_AINNL0043	Lot# MB15NO4143	TC00820838	K013	0.1242	ng/ml	3325	0.58							20220127_SR2DLT_Ab
AB01974205	01	Ainno_16251	Ainnocence	AIN1-43_AINNL0043	Lot# MB15NO4143	TC00820837	K013	0.1242	ng/ml	2925	0.54							20220127_SR2DLT_Ab
AB01974205	01	Ainno_16251	Ainnocence	AIN1-43_AINNL0043	Lot# MB15NO4143	TC00820838	K014	0.0393	ng/ml	2500	-0.55							20220127_SR2DLT_Ab
AB01974205	01	Ainno_16251	Ainnocence	AIN1-43_AINNL0043	Lot# MB15NO4143	TC00820837	K014	0.0393	ng/ml	2825	0.4							20220127_SR2DLT_Ab
AB01974205	01	Ainno_16251	Ainnocence	AIN1-43_AINNL0043	Lot# MB15NO4143	TC00820838	K015	0.01244	ng/ml	3175	0.37							20220127_SR2DLT_Ab
AB01974205	01	Ainno_16251	Ainnocence	AIN1-43_AINNL0043	Lot# MB15NO4143	TC00820837	K015	0.01244	ng/ml	1875	-0.96							20220127_SR2DLT_Ab
AB01974205	01	Ainno_16251	Ainnocence	AIN1-43_AINNL0043	Lot# MB15NO4143	TC00820838	K016	0.003936	ng/ml	2725	-0.25							20220127_SR2DLT_Ab
AB01974205	01	Ainno_16251	Ainnocence	AIN1-43_AINNL0043	Lot# MB15NO4143	TC00820837	K016	0.003936	ng/ml	2750	0.29							20220127_SR2DLT_Ab
AB01974205	01	Ainno_16251	Ainnocence	AIN1-43_AINNL0043	Lot# MB15NO4143	TC00820838	K017	0.001246	ng/ml	3575	0.92							20220127_SR2DLT_Ab
AB01974205	01	Ainno_16251	Ainnocence	AIN1-43_AINNL0043	Lot# MB15NO4143	TC00820837	K017	0.001246	ng/ml	2500	-0.07							20220127_SR2DLT_Ab
AB01974205	01	Ainno_16251	Ainnocence	AIN1-43_AINNL0043	Lot# MB15NO4143	TC00820838	K018	0.0003941	ng/ml	3650	1.02							20220127_SR2DLT_Ab
AB01974205	01	Ainno_16251	Ainnocence	AIN1-43_AINNL0043	Lot# MB15NO4143	TC00820837	K018	0.0003941	ng/ml	2125	-0.6							20220127_SR2DLT_Ab
AB01974205	01	Ainno_16251	Ainnocence	AIN1-43_AINNL0043	Lot# MB15NO4143	TC00820838	K019	0.0001247	ng/ml	3325	0.58							20220127_SR2DLT_Ab
AB01974205	01	Ainno_16251	Ainnocence	AIN1-43_AINNL0043	Lot# MB15NO4143	TC00820837	K019	0.0001247	ng/ml	3150	0.86							20220127_SR2DLT_Ab
AB01974205	01	Ainno_16251	Ainnocence	AIN1-43_AINNL0043	Lot# MB15NO4143	TC00820838	K020	3.947e-05	ng/ml	2550	-0.49							20220127_SR2DLT_Ab
AB01974205	01	Ainno_16251	Ainnocence	AIN1-43_AINNL0043	Lot# MB15NO4143	TC00820837	K020	3.947e-05	ng/ml	2200	-0.49							20220127_SR2DLT_Ab
AB01974205	01	Ainno_16251	Ainnocence	AIN1-43_AINNL0043	Lot# MB15NO4143	TC00820838	K021	1.249e-05	ng/ml	2575	-0.45							20220127_SR2DLT_Ab
AB01974205	01	Ainno_16251	Ainnocence	AIN1-43_AINNL0043	Lot# MB15NO4143	TC00820837	K021	1.249e-05	ng/ml	2300	-0.35							20220127_SR2DLT_Ab
AB01974205	01	Ainno_16251	Ainnocence	AIN1-43_AINNL0043	Lot# MB15NO4143	TC00820838	K022	3.953e-06	ng/ml	4050	1.57							20220127_SR2DLT_Ab
AB01974205	01	Ainno_16251	Ainnocence	AIN1-43_AINNL0043	Lot# MB15NO4143	TC00820837	K022	3.953e-06	ng/ml	2450	-0.14							20220127_SR2DLT_Ab
AB01974206	01	Ainno_16251	Ainnocence	AIN1-44_AINNL0044	Lot# MB15NO4144	TC00820838	L003	11440	ng/ml	2600	-0.42	>11440	Inactive	-0.12	0.77	0	40	20220127_SR2DLT_Ab
AB01974206	01	Ainno_16251	Ainnocence	AIN1-44_AINNL0044	Lot# MB15NO4144	TC00820837	L003	11440	ng/ml	2350	-0.28							20220127_SR2DLT_Ab
AB01974206	01	Ainno_16251	Ainnocence	AIN1-44_AINNL0044	Lot# MB15NO4144	TC00820838	L004	3620	ng/ml	2300	-0.83							20220127_SR2DLT_Ab
AB01974206	01	Ainno_16251	Ainnocence	AIN1-44_AINNL0044	Lot# MB15NO4144	TC00820837	L004	3620	ng/ml	3625	1.54							20220127_SR2DLT_Ab
AB01974206	01	Ainno_16251	Ainnocence	AIN1-44_AINNL0044	Lot# MB15NO4144	TC00820838	L005	1146	ng/ml	2575	-0.45							20220127_SR2DLT_Ab
AB01974206	01	Ainno_16251	Ainnocence	AIN1-44_AINNL0044	Lot# MB15NO4144	TC00820837	L005	1146	ng/ml	2525	-0.03							20220127_SR2DLT_Ab
AB01974206	01	Ainno_16251	Ainnocence	AIN1-44_AINNL0044	Lot# MB15NO4144	TC00820838	L006	362.5	ng/ml	2775	-0.18							20220127_SR2DLT_Ab
AB01974206	01	Ainno_16251	Ainnocence	AIN1-44_AINNL0044	Lot# MB15NO4144	TC00820837	L006	362.5	ng/ml	1975	-0.82							20220127_SR2DLT_Ab
AB01974206	01	Ainno_16251	Ainnocence	AIN1-44_AINNL0044	Lot# MB15NO4144	TC00820838	L007	114.7	ng/ml	2975	0.1							20220127_SR2DLT_Ab
AB01974206	01	Ainno_16251	Ainnocence	AIN1-44_AINNL0044	Lot# MB15NO4144	TC00820837	L007	114.7	ng/ml	2875	0.47							20220127_SR2DLT_Ab
AB01974206	01	Ainno_16251	Ainnocence	AIN1-44_AINNL0044	Lot# MB15NO4144	TC00820838	L008	36.31	ng/ml	3250	0.47							20220127_SR2DLT_Ab
AB01974206	01	Ainno_16251	Ainnocence	AIN1-44_AINNL0044	Lot# MB15NO4144	TC00820837	L008	36.31	ng/ml	3025	0.68							20220127_SR2DLT_Ab
AB01974206	01	Ainno_16251	Ainnocence	AIN1-44_AINNL0044	Lot# MB15NO4144	TC00820838	L009	11.49	ng/ml	2850	-0.07							20220127_SR2DLT_Ab
AB01974206	01	Ainno_16251	Ainnocence	AIN1-44_AINNL0044	Lot# MB15NO4144	TC00820837	L009	11.49	ng/ml	2475	-0.1							20220127_SR2DLT_Ab
AB01974206	01	Ainno_16251	Ainnocence	AIN1-44_AINNL0044	Lot# MB15NO4144	TC00820838	L010	3.636	ng/ml	3000	0.13							20220127_SR2DLT_Ab
AB01974206	01	Ainno_16251	Ainnocence	AIN1-44_AINNL0044	Lot# MB15NO4144	TC00820837	L010	3.636	ng/ml	2200	-0.49							20220127_SR2DLT_Ab
AB01974206	01	Ainno_16251	Ainnocence	AIN1-44_AINNL0044	Lot# MB15NO4144	TC00820838	L011	1.151	ng/ml	2800	-0.14							20220127_SR2DLT_Ab
AB01974206	01	Ainno_16251	Ainnocence	AIN1-44_AINNL0044	Lot# MB15NO4144	TC00820837	L011	1.151	ng/ml	3675	1.61							20220127_SR2DLT_Ab
AB01974206	01	Ainno_16251	Ainnocence	AIN1-44_AINNL0044	Lot# MB15NO4144	TC00820838	L012	0.3641	ng/ml	4000	1.5							20220127_SR2DLT_Ab
AB01974206	01	Ainno_16251	Ainnocence	AIN1-44_AINNL0044	Lot# MB15NO4144	TC00820837	L012	0.3641	ng/ml	2850	0.43							20220127_SR2DLT_Ab
AB01974206	01	Ainno_16251	Ainnocence	AIN1-44_AINNL0044	Lot# MB15NO4144	TC00820838	L013	0.1152	ng/ml	3550	0.88							20220127_SR2DLT_Ab
AB01974206	01	Ainno_16251	Ainnocence	AIN1-44_AINNL0044	Lot# MB15NO4144	TC00820837	L013	0.1152	ng/ml	3900	1.94							20220127_SR2DLT_Ab
AB01974206	01	Ainno_16251	Ainnocence	AIN1-44_AINNL0044	Lot# MB15NO4144	TC00820838	L014	0.03646	ng/ml	3475	0.78							20220127_SR2DLT_Ab
AB01974206	01	Ainno_16251	Ainnocence	AIN1-44_AINNL0044	Lot# MB15NO4144	TC00820837	L014	0.03646	ng/ml	2925	0.54							20220127_SR2DLT_Ab
AB01974206	01	Ainno_16251	Ainnocence	AIN1-44_AINNL0044	Lot# MB15NO4144	TC00820838	L015	0.01154	ng/ml	4175	1.74							20220127_SR2DLT_Ab
AB01974206	01	Ainno_16251	Ainnocence	AIN1-44_AINNL0044	Lot# MB15NO4144	TC00820837	L015	0.01154	ng/ml	2800	0.36							20220127_SR2DLT_Ab
AB01974206	01	Ainno_16251	Ainnocence	AIN1-44_AINNL0044	Lot# MB15NO4144	TC00820838	L016	0.003652	ng/ml	3925	1.4							20220127_SR2DLT_Ab
AB01974206	01	Ainno_16251	Ainnocence	AIN1-44_AINNL0044	Lot# MB15NO4144	TC00820837	L016	0.003652	ng/ml	2925	0.54							20220127_SR2DLT_Ab
AB01974206	01	Ainno_16251	Ainnocence	AIN1-44_AINNL0044	Lot# MB15NO4144	TC00820838	L017	0.001156	ng/ml	2975	0.1							20220127_SR2DLT_Ab
AB01974206	01	Ainno_16251	Ainnocence	AIN1-44_AINNL0044	Lot# MB15NO4144	TC00820837	L017	0.001156	ng/ml	3500	1.36							20220127_SR2DLT_Ab
AB01974206	01	Ainno_16251	Ainnocence	AIN1-44_AINNL0044	Lot# MB15NO4144	TC00820838	L018	0.0003657	ng/ml	3600	0.95							20220127_SR2DLT_Ab
AB01974206	01	Ainno_16251	Ainnocence	AIN1-44_AINNL0044	Lot# MB15NO4144	TC00820837	L018	0.0003657	ng/ml	2825	0.4							20220127_SR2DLT_Ab
AB01974206	01	Ainno_16251	Ainnocence	AIN1-44_AINNL0044	Lot# MB15NO4144	TC00820838	L019	0.0001157	ng/ml	3050	0.2							20220127_SR2DLT_Ab
AB01974206	01	Ainno_16251	Ainnocence	AIN1-44_AINNL0044	Lot# MB15NO4144	TC00820837	L019	0.0001157	ng/ml	3950	2.01							20220127_SR2DLT_Ab
AB01974206	01	Ainno_16251	Ainnocence	AIN1-44_AINNL0044	Lot# MB15NO4144	TC00820838	L020	3.662e-05	ng/ml	2575	-0.45							20220127_SR2DLT_Ab
AB01974206	01	Ainno_16251	Ainnocence	AIN1-44_AINNL0044	Lot# MB15NO4144	TC00820837	L020	3.662e-05	ng/ml	4250	2.44							20220127_SR2DLT_Ab
AB01974206	01	Ainno_16251	Ainnocence	AIN1-44_AINNL0044	Lot# MB15NO4144	TC00820838	L021	1.159e-05	ng/ml	2975	0.1							20220127_SR2DLT_Ab
AB01974206	01	Ainno_16251	Ainnocence	AIN1-44_AINNL0044	Lot# MB15NO4144	TC00820837	L021	1.159e-05	ng/ml	3275	1.04							20220127_SR2DLT_Ab
AB01974206	01	Ainno_16251	Ainnocence	AIN1-44_AINNL0044	Lot# MB15NO4144	TC00820838	L022	3.668e-06	ng/ml	3600	0.95							20220127_SR2DLT_Ab
AB01974206	01	Ainno_16251	Ainnocence	AIN1-44_AINNL0044	Lot# MB15NO4144	TC00820837	L022	3.668e-06	ng/ml	3825	1.83							20220127_SR2DLT_Ab
AB01974207	01	Ainno_16251	Ainnocence	AIN1-45_AINNL0045	Lot# MB15NO4145	TC00820838	M003	11440	ng/ml	75375	99.34	42.743	Active	1.58	4.59	2.89	40	20220127_SR2DLT_Ab
AB01974207	01	Ainno_16251	Ainnocence	AIN1-45_AINNL0045	Lot# MB15NO4145	TC00820837	M003	11440	ng/ml	70300	96.85							20220127_SR2DLT_Ab
AB01974207	01	Ainno_16251	Ainnocence	AIN1-45_AINNL0045	Lot# MB15NO4145	TC00820838	M004	3620	ng/ml	74650	98.35							20220127_SR2DLT_Ab
AB01974207	01	Ainno_16251	Ainnocence	AIN1-45_AINNL0045	Lot# MB15NO4145	TC00820837	M004	3620	ng/ml	69600	95.85							20220127_SR2DLT_Ab
AB01974207	01	Ainno_16251	Ainnocence	AIN1-45_AINNL0045	Lot# MB15NO4145	TC00820838	M005	1146	ng/ml	73075	96.19							20220127_SR2DLT_Ab
AB01974207	01	Ainno_16251	Ainnocence	AIN1-45_AINNL0045	Lot# MB15NO4145	TC00820837	M005	1146	ng/ml	73325	101.17							20220127_SR2DLT_Ab
AB01974207	01	Ainno_16251	Ainnocence	AIN1-45_AINNL0045	Lot# MB15NO4145	TC00820838	M006	362.5	ng/ml	73475	96.74							20220127_SR2DLT_Ab
AB01974207	01	Ainno_16251	Ainnocence	AIN1-45_AINNL0045	Lot# MB15NO4145	TC00820837	M006	362.5	ng/ml	69250	95.35							20220127_SR2DLT_Ab
AB01974207	01	Ainno_16251	Ainnocence	AIN1-45_AINNL0045	Lot# MB15NO4145	TC00820838	M007	114.7	ng/ml	77400	102.12							20220127_SR2DLT_Ab
AB01974207	01	Ainno_16251	Ainnocence	AIN1-45_AINNL0045	Lot# MB15NO4145	TC00820837	M007	114.7	ng/ml	49075	66.51							20220127_SR2DLT_Ab
AB01974207	01	Ainno_16251	Ainnocence	AIN1-45_AINNL0045	Lot# MB15NO4145	TC00820838	M008	36.31	ng/ml	37450	47.35							20220127_SR2DLT_Ab
AB01974207	01	Ainno_16251	Ainnocence	AIN1-45_AINNL0045	Lot# MB15NO4145	TC00820837	M008	36.31	ng/ml	28250	36.74							20220127_SR2DLT_Ab
AB01974207	01	Ainno_16251	Ainnocence	AIN1-45_AINNL0045	Lot# MB15NO4145	TC00820838	M009	11.49	ng/ml	11925	12.36							20220127_SR2DLT_Ab
AB01974207	01	Ainno_16251	Ainnocence	AIN1-45_AINNL0045	Lot# MB15NO4145	TC00820837	M009	11.49	ng/ml	11675	13.05							20220127_SR2DLT_Ab
AB01974207	01	Ainno_16251	Ainnocence	AIN1-45_AINNL0045	Lot# MB15NO4145	TC00820838	M010	3.636	ng/ml	3400	0.68							20220127_SR2DLT_Ab
AB01974207	01	Ainno_16251	Ainnocence	AIN1-45_AINNL0045	Lot# MB15NO4145	TC00820837	M010	3.636	ng/ml	5450	4.15							20220127_SR2DLT_Ab
AB01974207	01	Ainno_16251	Ainnocence	AIN1-45_AINNL0045	Lot# MB15NO4145	TC00820838	M011	1.151	ng/ml	4225	1.81							20220127_SR2DLT_Ab
AB01974207	01	Ainno_16251	Ainnocence	AIN1-45_AINNL0045	Lot# MB15NO4145	TC00820837	M011	1.151	ng/ml	2725	0.26							20220127_SR2DLT_Ab
AB01974207	01	Ainno_16251	Ainnocence	AIN1-45_AINNL0045	Lot# MB15NO4145	TC00820838	M012	0.3641	ng/ml	4250	1.84							20220127_SR2DLT_Ab
AB01974207	01	Ainno_16251	Ainnocence	AIN1-45_AINNL0045	Lot# MB15NO4145	TC00820837	M012	0.3641	ng/ml	5025	3.54							20220127_SR2DLT_Ab
AB01974207	01	Ainno_16251	Ainnocence	AIN1-45_AINNL0045	Lot# MB15NO4145	TC00820838	M013	0.1152	ng/ml	3075	0.23							20220127_SR2DLT_Ab
AB01974207	01	Ainno_16251	Ainnocence	AIN1-45_AINNL0045	Lot# MB15NO4145	TC00820837	M013	0.1152	ng/ml	3450	1.29							20220127_SR2DLT_Ab
AB01974207	01	Ainno_16251	Ainnocence	AIN1-45_AINNL0045	Lot# MB15NO4145	TC00820838	M014	0.03646	ng/ml	3350	0.61							20220127_SR2DLT_Ab
AB01974207	01	Ainno_16251	Ainnocence	AIN1-45_AINNL0045	Lot# MB15NO4145	TC00820837	M014	0.03646	ng/ml	3150	0.86							20220127_SR2DLT_Ab
AB01974207	01	Ainno_16251	Ainnocence	AIN1-45_AINNL0045	Lot# MB15NO4145	TC00820838	M015	0.01154	ng/ml	4925	2.77							20220127_SR2DLT_Ab
AB01974207	01	Ainno_16251	Ainnocence	AIN1-45_AINNL0045	Lot# MB15NO4145	TC00820837	M015	0.01154	ng/ml	3150	0.86							20220127_SR2DLT_Ab
AB01974207	01	Ainno_16251	Ainnocence	AIN1-45_AINNL0045	Lot# MB15NO4145	TC00820838	M016	0.003652	ng/ml	3250	0.47							20220127_SR2DLT_Ab
AB01974207	01	Ainno_16251	Ainnocence	AIN1-45_AINNL0045	Lot# MB15NO4145	TC00820837	M016	0.003652	ng/ml	2875	0.47							20220127_SR2DLT_Ab
AB01974207	01	Ainno_16251	Ainnocence	AIN1-45_AINNL0045	Lot# MB15NO4145	TC00820838	M017	0.001156	ng/ml	4425	2.08							20220127_SR2DLT_Ab
AB01974207	01	Ainno_16251	Ainnocence	AIN1-45_AINNL0045	Lot# MB15NO4145	TC00820837	M017	0.001156	ng/ml	2425	-0.17							20220127_SR2DLT_Ab
AB01974207	01	Ainno_16251	Ainnocence	AIN1-45_AINNL0045	Lot# MB15NO4145	TC00820838	M018	0.0003657	ng/ml	4400	2.05							20220127_SR2DLT_Ab
AB01974207	01	Ainno_16251	Ainnocence	AIN1-45_AINNL0045	Lot# MB15NO4145	TC00820837	M018	0.0003657	ng/ml	3175	0.9							20220127_SR2DLT_Ab
AB01974207	01	Ainno_16251	Ainnocence	AIN1-45_AINNL0045	Lot# MB15NO4145	TC00820838	M019	0.0001157	ng/ml	3650	1.02							20220127_SR2DLT_Ab
AB01974207	01	Ainno_16251	Ainnocence	AIN1-45_AINNL0045	Lot# MB15NO4145	TC00820837	M019	0.0001157	ng/ml	3250	1.01							20220127_SR2DLT_Ab
AB01974207	01	Ainno_16251	Ainnocence	AIN1-45_AINNL0045	Lot# MB15NO4145	TC00820838	M020	3.662e-05	ng/ml	3125	0.3							20220127_SR2DLT_Ab
AB01974207	01	Ainno_16251	Ainnocence	AIN1-45_AINNL0045	Lot# MB15NO4145	TC00820837	M020	3.662e-05	ng/ml	2900	0.51							20220127_SR2DLT_Ab
AB01974207	01	Ainno_16251	Ainnocence	AIN1-45_AINNL0045	Lot# MB15NO4145	TC00820838	M021	1.159e-05	ng/ml	2975	0.1							20220127_SR2DLT_Ab
AB01974207	01	Ainno_16251	Ainnocence	AIN1-45_AINNL0045	Lot# MB15NO4145	TC00820837	M021	1.159e-05	ng/ml	2875	0.47							20220127_SR2DLT_Ab
AB01974207	01	Ainno_16251	Ainnocence	AIN1-45_AINNL0045	Lot# MB15NO4145	TC00820838	M022	3.668e-06	ng/ml	3900	1.36							20220127_SR2DLT_Ab
AB01974207	01	Ainno_16251	Ainnocence	AIN1-45_AINNL0045	Lot# MB15NO4145	TC00820837	M022	3.668e-06	ng/ml	3175	0.9							20220127_SR2DLT_Ab
AB01974208	01	Ainno_16251	Ainnocence	AIN1-46_AINNL0046	Lot# MB15NO4146	TC00820838	N003	13110	ng/ml	84475	111.81	>13110	Active	0.98	20.94	>9999	40	20220127_SR2DLT_Ab
AB01974208	01	Ainno_16251	Ainnocence	AIN1-46_AINNL0046	Lot# MB15NO4146	TC00820837	N003	13110	ng/ml	40575	54.36							20220127_SR2DLT_Ab
AB01974208	01	Ainno_16251	Ainnocence	AIN1-46_AINNL0046	Lot# MB15NO4146	TC00820838	N004	4149	ng/ml	18850	21.86							20220127_SR2DLT_Ab
AB01974208	01	Ainno_16251	Ainnocence	AIN1-46_AINNL0046	Lot# MB15NO4146	TC00820837	N004	4149	ng/ml	18725	23.13							20220127_SR2DLT_Ab
AB01974208	01	Ainno_16251	Ainnocence	AIN1-46_AINNL0046	Lot# MB15NO4146	TC00820838	N005	1313	ng/ml	10700	10.69							20220127_SR2DLT_Ab
AB01974208	01	Ainno_16251	Ainnocence	AIN1-46_AINNL0046	Lot# MB15NO4146	TC00820837	N005	1313	ng/ml	4775	3.19							20220127_SR2DLT_Ab
AB01974208	01	Ainno_16251	Ainnocence	AIN1-46_AINNL0046	Lot# MB15NO4146	TC00820838	N006	415.5	ng/ml	3750	1.16							20220127_SR2DLT_Ab
AB01974208	01	Ainno_16251	Ainnocence	AIN1-46_AINNL0046	Lot# MB15NO4146	TC00820837	N006	415.5	ng/ml	3300	1.08							20220127_SR2DLT_Ab
AB01974208	01	Ainno_16251	Ainnocence	AIN1-46_AINNL0046	Lot# MB15NO4146	TC00820838	N007	131.5	ng/ml	3125	0.3							20220127_SR2DLT_Ab
AB01974208	01	Ainno_16251	Ainnocence	AIN1-46_AINNL0046	Lot# MB15NO4146	TC00820837	N007	131.5	ng/ml	3100	0.79							20220127_SR2DLT_Ab
AB01974208	01	Ainno_16251	Ainnocence	AIN1-46_AINNL0046	Lot# MB15NO4146	TC00820838	N008	41.61	ng/ml	3300	0.54							20220127_SR2DLT_Ab
AB01974208	01	Ainno_16251	Ainnocence	AIN1-46_AINNL0046	Lot# MB15NO4146	TC00820837	N008	41.61	ng/ml	2950	0.58							20220127_SR2DLT_Ab
AB01974208	01	Ainno_16251	Ainnocence	AIN1-46_AINNL0046	Lot# MB15NO4146	TC00820838	N009	13.17	ng/ml	2950	0.06							20220127_SR2DLT_Ab
AB01974208	01	Ainno_16251	Ainnocence	AIN1-46_AINNL0046	Lot# MB15NO4146	TC00820837	N009	13.17	ng/ml	3400	1.22							20220127_SR2DLT_Ab
AB01974208	01	Ainno_16251	Ainnocence	AIN1-46_AINNL0046	Lot# MB15NO4146	TC00820838	N010	4.167	ng/ml	2900	-0.01							20220127_SR2DLT_Ab
AB01974208	01	Ainno_16251	Ainnocence	AIN1-46_AINNL0046	Lot# MB15NO4146	TC00820837	N010	4.167	ng/ml	3100	0.79							20220127_SR2DLT_Ab
AB01974208	01	Ainno_16251	Ainnocence	AIN1-46_AINNL0046	Lot# MB15NO4146	TC00820838	N011	1.319	ng/ml	3750	1.16							20220127_SR2DLT_Ab
AB01974208	01	Ainno_16251	Ainnocence	AIN1-46_AINNL0046	Lot# MB15NO4146	TC00820837	N011	1.319	ng/ml	4425	2.69							20220127_SR2DLT_Ab
AB01974208	01	Ainno_16251	Ainnocence	AIN1-46_AINNL0046	Lot# MB15NO4146	TC00820838	N012	0.4173	ng/ml	3300	0.54							20220127_SR2DLT_Ab
AB01974208	01	Ainno_16251	Ainnocence	AIN1-46_AINNL0046	Lot# MB15NO4146	TC00820837	N012	0.4173	ng/ml	3775	1.76							20220127_SR2DLT_Ab
AB01974208	01	Ainno_16251	Ainnocence	AIN1-46_AINNL0046	Lot# MB15NO4146	TC00820838	N013	0.132	ng/ml	3175	0.37							20220127_SR2DLT_Ab
AB01974208	01	Ainno_16251	Ainnocence	AIN1-46_AINNL0046	Lot# MB15NO4146	TC00820837	N013	0.132	ng/ml	4350	2.58							20220127_SR2DLT_Ab
AB01974208	01	Ainno_16251	Ainnocence	AIN1-46_AINNL0046	Lot# MB15NO4146	TC00820838	N014	0.04179	ng/ml	4125	1.67							20220127_SR2DLT_Ab
AB01974208	01	Ainno_16251	Ainnocence	AIN1-46_AINNL0046	Lot# MB15NO4146	TC00820837	N014	0.04179	ng/ml	2550	0.01							20220127_SR2DLT_Ab
AB01974208	01	Ainno_16251	Ainnocence	AIN1-46_AINNL0046	Lot# MB15NO4146	TC00820838	N015	0.01322	ng/ml	2675	-0.31							20220127_SR2DLT_Ab
AB01974208	01	Ainno_16251	Ainnocence	AIN1-46_AINNL0046	Lot# MB15NO4146	TC00820837	N015	0.01322	ng/ml	2350	-0.28							20220127_SR2DLT_Ab
AB01974208	01	Ainno_16251	Ainnocence	AIN1-46_AINNL0046	Lot# MB15NO4146	TC00820838	N016	0.004185	ng/ml	3450	0.75							20220127_SR2DLT_Ab
AB01974208	01	Ainno_16251	Ainnocence	AIN1-46_AINNL0046	Lot# MB15NO4146	TC00820837	N016	0.004185	ng/ml	2900	0.51							20220127_SR2DLT_Ab
AB01974208	01	Ainno_16251	Ainnocence	AIN1-46_AINNL0046	Lot# MB15NO4146	TC00820838	N017	0.001324	ng/ml	4350	1.98							20220127_SR2DLT_Ab
AB01974208	01	Ainno_16251	Ainnocence	AIN1-46_AINNL0046	Lot# MB15NO4146	TC00820837	N017	0.001324	ng/ml	3150	0.86							20220127_SR2DLT_Ab
AB01974208	01	Ainno_16251	Ainnocence	AIN1-46_AINNL0046	Lot# MB15NO4146	TC00820838	N018	0.0004191	ng/ml	3125	0.3							20220127_SR2DLT_Ab
AB01974208	01	Ainno_16251	Ainnocence	AIN1-46_AINNL0046	Lot# MB15NO4146	TC00820837	N018	0.0004191	ng/ml	2900	0.51							20220127_SR2DLT_Ab
AB01974208	01	Ainno_16251	Ainnocence	AIN1-46_AINNL0046	Lot# MB15NO4146	TC00820838	N019	0.0001326	ng/ml	2925	0.03							20220127_SR2DLT_Ab
AB01974208	01	Ainno_16251	Ainnocence	AIN1-46_AINNL0046	Lot# MB15NO4146	TC00820837	N019	0.0001326	ng/ml	2825	0.4							20220127_SR2DLT_Ab
AB01974208	01	Ainno_16251	Ainnocence	AIN1-46_AINNL0046	Lot# MB15NO4146	TC00820838	N020	4.197e-05	ng/ml	3600	0.95							20220127_SR2DLT_Ab
AB01974208	01	Ainno_16251	Ainnocence	AIN1-46_AINNL0046	Lot# MB15NO4146	TC00820837	N020	4.197e-05	ng/ml	3825	1.83							20220127_SR2DLT_Ab
AB01974208	01	Ainno_16251	Ainnocence	AIN1-46_AINNL0046	Lot# MB15NO4146	TC00820838	N021	1.328e-05	ng/ml	3725	1.12							20220127_SR2DLT_Ab
AB01974208	01	Ainno_16251	Ainnocence	AIN1-46_AINNL0046	Lot# MB15NO4146	TC00820837	N021	1.328e-05	ng/ml	3525	1.4							20220127_SR2DLT_Ab
AB01974208	01	Ainno_16251	Ainnocence	AIN1-46_AINNL0046	Lot# MB15NO4146	TC00820838	N022	4.203e-06	ng/ml	5975	4.21							20220127_SR2DLT_Ab
AB01974208	01	Ainno_16251	Ainnocence	AIN1-46_AINNL0046	Lot# MB15NO4146	TC00820837	N022	4.203e-06	ng/ml	4250	2.44							20220127_SR2DLT_Ab
AB01974209	01	Ainno_16251	Ainnocence	AIN1-47_AINNL0047	Lot# MB15NO4147	TC00820838	O003	24780	ng/ml	84375	111.68	1880.59	Active	1.59	7.22	200.04	40	20220127_SR2DLT_Ab
AB01974209	01	Ainno_16251	Ainnocence	AIN1-47_AINNL0047	Lot# MB15NO4147	TC00820837	O003	24780	ng/ml	81300	112.57							20220127_SR2DLT_Ab
AB01974209	01	Ainno_16251	Ainnocence	AIN1-47_AINNL0047	Lot# MB15NO4147	TC00820838	O004	7842	ng/ml	88625	117.5							20220127_SR2DLT_Ab
AB01974209	01	Ainno_16251	Ainnocence	AIN1-47_AINNL0047	Lot# MB15NO4147	TC00820837	O004	7842	ng/ml	64825	89.02							20220127_SR2DLT_Ab
AB01974209	01	Ainno_16251	Ainnocence	AIN1-47_AINNL0047	Lot# MB15NO4147	TC00820838	O005	2482	ng/ml	43825	56.09							20220127_SR2DLT_Ab
AB01974209	01	Ainno_16251	Ainnocence	AIN1-47_AINNL0047	Lot# MB15NO4147	TC00820837	O005	2482	ng/ml	33300	43.96							20220127_SR2DLT_Ab
AB01974209	01	Ainno_16251	Ainnocence	AIN1-47_AINNL0047	Lot# MB15NO4147	TC00820838	O006	785.3	ng/ml	31450	39.13							20220127_SR2DLT_Ab
AB01974209	01	Ainno_16251	Ainnocence	AIN1-47_AINNL0047	Lot# MB15NO4147	TC00820837	O006	785.3	ng/ml	12525	14.26							20220127_SR2DLT_Ab
AB01974209	01	Ainno_16251	Ainnocence	AIN1-47_AINNL0047	Lot# MB15NO4147	TC00820838	O007	248.5	ng/ml	7450	6.23							20220127_SR2DLT_Ab
AB01974209	01	Ainno_16251	Ainnocence	AIN1-47_AINNL0047	Lot# MB15NO4147	TC00820837	O007	248.5	ng/ml	10325	11.12							20220127_SR2DLT_Ab
AB01974209	01	Ainno_16251	Ainnocence	AIN1-47_AINNL0047	Lot# MB15NO4147	TC00820838	O008	78.64	ng/ml	4500	2.19							20220127_SR2DLT_Ab
AB01974209	01	Ainno_16251	Ainnocence	AIN1-47_AINNL0047	Lot# MB15NO4147	TC00820837	O008	78.64	ng/ml	7100	6.51							20220127_SR2DLT_Ab
AB01974209	01	Ainno_16251	Ainnocence	AIN1-47_AINNL0047	Lot# MB15NO4147	TC00820838	O009	24.89	ng/ml	5175	3.11							20220127_SR2DLT_Ab
AB01974209	01	Ainno_16251	Ainnocence	AIN1-47_AINNL0047	Lot# MB15NO4147	TC00820837	O009	24.89	ng/ml	4775	3.19							20220127_SR2DLT_Ab
AB01974209	01	Ainno_16251	Ainnocence	AIN1-47_AINNL0047	Lot# MB15NO4147	TC00820838	O010	7.876	ng/ml	3325	0.58							20220127_SR2DLT_Ab
AB01974209	01	Ainno_16251	Ainnocence	AIN1-47_AINNL0047	Lot# MB15NO4147	TC00820837	O010	7.876	ng/ml	3150	0.86							20220127_SR2DLT_Ab
AB01974209	01	Ainno_16251	Ainnocence	AIN1-47_AINNL0047	Lot# MB15NO4147	TC00820838	O011	2.492	ng/ml	4300	1.91							20220127_SR2DLT_Ab
AB01974209	01	Ainno_16251	Ainnocence	AIN1-47_AINNL0047	Lot# MB15NO4147	TC00820837	O011	2.492	ng/ml	3025	0.68							20220127_SR2DLT_Ab
AB01974209	01	Ainno_16251	Ainnocence	AIN1-47_AINNL0047	Lot# MB15NO4147	TC00820838	O012	0.7887	ng/ml	3475	0.78							20220127_SR2DLT_Ab
AB01974209	01	Ainno_16251	Ainnocence	AIN1-47_AINNL0047	Lot# MB15NO4147	TC00820837	O012	0.7887	ng/ml	3725	1.69							20220127_SR2DLT_Ab
AB01974209	01	Ainno_16251	Ainnocence	AIN1-47_AINNL0047	Lot# MB15NO4147	TC00820838	O013	0.2496	ng/ml	6150	4.45							20220127_SR2DLT_Ab
AB01974209	01	Ainno_16251	Ainnocence	AIN1-47_AINNL0047	Lot# MB15NO4147	TC00820837	O013	0.2496	ng/ml	2575	0.04							20220127_SR2DLT_Ab
AB01974209	01	Ainno_16251	Ainnocence	AIN1-47_AINNL0047	Lot# MB15NO4147	TC00820838	O014	0.07898	ng/ml	5350	3.35							20220127_SR2DLT_Ab
AB01974209	01	Ainno_16251	Ainnocence	AIN1-47_AINNL0047	Lot# MB15NO4147	TC00820837	O014	0.07898	ng/ml	2825	0.4							20220127_SR2DLT_Ab
AB01974209	01	Ainno_16251	Ainnocence	AIN1-47_AINNL0047	Lot# MB15NO4147	TC00820838	O015	0.025	ng/ml	3125	0.3							20220127_SR2DLT_Ab
AB01974209	01	Ainno_16251	Ainnocence	AIN1-47_AINNL0047	Lot# MB15NO4147	TC00820837	O015	0.025	ng/ml	2700	0.22							20220127_SR2DLT_Ab
AB01974209	01	Ainno_16251	Ainnocence	AIN1-47_AINNL0047	Lot# MB15NO4147	TC00820838	O016	0.00791	ng/ml	3100	0.27							20220127_SR2DLT_Ab
AB01974209	01	Ainno_16251	Ainnocence	AIN1-47_AINNL0047	Lot# MB15NO4147	TC00820837	O016	0.00791	ng/ml	3025	0.68							20220127_SR2DLT_Ab
AB01974209	01	Ainno_16251	Ainnocence	AIN1-47_AINNL0047	Lot# MB15NO4147	TC00820838	O017	0.002503	ng/ml	2950	0.06							20220127_SR2DLT_Ab
AB01974209	01	Ainno_16251	Ainnocence	AIN1-47_AINNL0047	Lot# MB15NO4147	TC00820837	O017	0.002503	ng/ml	2000	-0.78							20220127_SR2DLT_Ab
AB01974209	01	Ainno_16251	Ainnocence	AIN1-47_AINNL0047	Lot# MB15NO4147	TC00820838	O018	0.0007921	ng/ml	2800	-0.14							20220127_SR2DLT_Ab
AB01974209	01	Ainno_16251	Ainnocence	AIN1-47_AINNL0047	Lot# MB15NO4147	TC00820837	O018	0.0007921	ng/ml	4375	2.61							20220127_SR2DLT_Ab
AB01974209	01	Ainno_16251	Ainnocence	AIN1-47_AINNL0047	Lot# MB15NO4147	TC00820838	O019	0.0002507	ng/ml	3875	1.33							20220127_SR2DLT_Ab
AB01974209	01	Ainno_16251	Ainnocence	AIN1-47_AINNL0047	Lot# MB15NO4147	TC00820837	O019	0.0002507	ng/ml	2850	0.43							20220127_SR2DLT_Ab
AB01974209	01	Ainno_16251	Ainnocence	AIN1-47_AINNL0047	Lot# MB15NO4147	TC00820838	O020	7.933e-05	ng/ml	2700	-0.28							20220127_SR2DLT_Ab
AB01974209	01	Ainno_16251	Ainnocence	AIN1-47_AINNL0047	Lot# MB15NO4147	TC00820837	O020	7.933e-05	ng/ml	2975	0.61							20220127_SR2DLT_Ab
AB01974209	01	Ainno_16251	Ainnocence	AIN1-47_AINNL0047	Lot# MB15NO4147	TC00820838	O021	2.51e-05	ng/ml	3125	0.3							20220127_SR2DLT_Ab
AB01974209	01	Ainno_16251	Ainnocence	AIN1-47_AINNL0047	Lot# MB15NO4147	TC00820837	O021	2.51e-05	ng/ml	2425	-0.17							20220127_SR2DLT_Ab
AB01974209	01	Ainno_16251	Ainnocence	AIN1-47_AINNL0047	Lot# MB15NO4147	TC00820838	O022	7.944e-06	ng/ml	4350	1.98							20220127_SR2DLT_Ab
AB01974209	01	Ainno_16251	Ainnocence	AIN1-47_AINNL0047	Lot# MB15NO4147	TC00820837	O022	7.944e-06	ng/ml	2200	-0.49							20220127_SR2DLT_Ab
AB01974210	01	Ainno_16251	Ainnocence	AIN1-48_AINNL0048	Lot# MB15NO4148	TC00820838	P003	11000	ng/ml	73150	96.29	14.076	Active	3.57	3.89	0.75	40	20220127_SR2DLT_Ab
AB01974210	01	Ainno_16251	Ainnocence	AIN1-48_AINNL0048	Lot# MB15NO4148	TC00820837	P003	11000	ng/ml	73675	101.67							20220127_SR2DLT_Ab
AB01974210	01	Ainno_16251	Ainnocence	AIN1-48_AINNL0048	Lot# MB15NO4148	TC00820838	P004	3481	ng/ml	72775	95.78							20220127_SR2DLT_Ab
AB01974210	01	Ainno_16251	Ainnocence	AIN1-48_AINNL0048	Lot# MB15NO4148	TC00820837	P004	3481	ng/ml	72050	99.35							20220127_SR2DLT_Ab
AB01974210	01	Ainno_16251	Ainnocence	AIN1-48_AINNL0048	Lot# MB15NO4148	TC00820838	P005	1102	ng/ml	72700	95.67							20220127_SR2DLT_Ab
AB01974210	01	Ainno_16251	Ainnocence	AIN1-48_AINNL0048	Lot# MB15NO4148	TC00820837	P005	1102	ng/ml	70700	97.42							20220127_SR2DLT_Ab
AB01974210	01	Ainno_16251	Ainnocence	AIN1-48_AINNL0048	Lot# MB15NO4148	TC00820838	P006	348.6	ng/ml	73050	96.15							20220127_SR2DLT_Ab
AB01974210	01	Ainno_16251	Ainnocence	AIN1-48_AINNL0048	Lot# MB15NO4148	TC00820837	P006	348.6	ng/ml	70500	97.13							20220127_SR2DLT_Ab
AB01974210	01	Ainno_16251	Ainnocence	AIN1-48_AINNL0048	Lot# MB15NO4148	TC00820838	P007	110.3	ng/ml	79925	105.58							20220127_SR2DLT_Ab
AB01974210	01	Ainno_16251	Ainnocence	AIN1-48_AINNL0048	Lot# MB15NO4148	TC00820837	P007	110.3	ng/ml	79475	109.96							20220127_SR2DLT_Ab
AB01974210	01	Ainno_16251	Ainnocence	AIN1-48_AINNL0048	Lot# MB15NO4148	TC00820838	P008	34.91	ng/ml	68875	90.43							20220127_SR2DLT_Ab
AB01974210	01	Ainno_16251	Ainnocence	AIN1-48_AINNL0048	Lot# MB15NO4148	TC00820837	P008	34.91	ng/ml	75100	103.71							20220127_SR2DLT_Ab
AB01974210	01	Ainno_16251	Ainnocence	AIN1-48_AINNL0048	Lot# MB15NO4148	TC00820838	P009	11.05	ng/ml	18675	21.62							20220127_SR2DLT_Ab
AB01974210	01	Ainno_16251	Ainnocence	AIN1-48_AINNL0048	Lot# MB15NO4148	TC00820837	P009	11.05	ng/ml	28425	36.99							20220127_SR2DLT_Ab
AB01974210	01	Ainno_16251	Ainnocence	AIN1-48_AINNL0048	Lot# MB15NO4148	TC00820838	P010	3.496	ng/ml	8900	8.22							20220127_SR2DLT_Ab
AB01974210	01	Ainno_16251	Ainnocence	AIN1-48_AINNL0048	Lot# MB15NO4148	TC00820837	P010	3.496	ng/ml	5825	4.69							20220127_SR2DLT_Ab
AB01974210	01	Ainno_16251	Ainnocence	AIN1-48_AINNL0048	Lot# MB15NO4148	TC00820838	P011	1.106	ng/ml	6675	5.17							20220127_SR2DLT_Ab
AB01974210	01	Ainno_16251	Ainnocence	AIN1-48_AINNL0048	Lot# MB15NO4148	TC00820837	P011	1.106	ng/ml	4425	2.69							20220127_SR2DLT_Ab
AB01974210	01	Ainno_16251	Ainnocence	AIN1-48_AINNL0048	Lot# MB15NO4148	TC00820838	P012	0.3501	ng/ml	4450	2.12							20220127_SR2DLT_Ab
AB01974210	01	Ainno_16251	Ainnocence	AIN1-48_AINNL0048	Lot# MB15NO4148	TC00820837	P012	0.3501	ng/ml	4200	2.36							20220127_SR2DLT_Ab
AB01974210	01	Ainno_16251	Ainnocence	AIN1-48_AINNL0048	Lot# MB15NO4148	TC00820838	P013	0.1108	ng/ml	4950	2.8							20220127_SR2DLT_Ab
AB01974210	01	Ainno_16251	Ainnocence	AIN1-48_AINNL0048	Lot# MB15NO4148	TC00820837	P013	0.1108	ng/ml	3375	1.18							20220127_SR2DLT_Ab
AB01974210	01	Ainno_16251	Ainnocence	AIN1-48_AINNL0048	Lot# MB15NO4148	TC00820838	P014	0.03506	ng/ml	4200	1.78							20220127_SR2DLT_Ab
AB01974210	01	Ainno_16251	Ainnocence	AIN1-48_AINNL0048	Lot# MB15NO4148	TC00820837	P014	0.03506	ng/ml	3950	2.01							20220127_SR2DLT_Ab
AB01974210	01	Ainno_16251	Ainnocence	AIN1-48_AINNL0048	Lot# MB15NO4148	TC00820838	P015	0.0111	ng/ml	2700	-0.28							20220127_SR2DLT_Ab
AB01974210	01	Ainno_16251	Ainnocence	AIN1-48_AINNL0048	Lot# MB15NO4148	TC00820837	P015	0.0111	ng/ml	2850	0.43							20220127_SR2DLT_Ab
AB01974210	01	Ainno_16251	Ainnocence	AIN1-48_AINNL0048	Lot# MB15NO4148	TC00820838	P016	0.003511	ng/ml	3225	0.44							20220127_SR2DLT_Ab
AB01974210	01	Ainno_16251	Ainnocence	AIN1-48_AINNL0048	Lot# MB15NO4148	TC00820837	P016	0.003511	ng/ml	3575	1.47							20220127_SR2DLT_Ab
AB01974210	01	Ainno_16251	Ainnocence	AIN1-48_AINNL0048	Lot# MB15NO4148	TC00820838	P017	0.001111	ng/ml	3875	1.33							20220127_SR2DLT_Ab
AB01974210	01	Ainno_16251	Ainnocence	AIN1-48_AINNL0048	Lot# MB15NO4148	TC00820837	P017	0.001111	ng/ml	2300	-0.35							20220127_SR2DLT_Ab
AB01974210	01	Ainno_16251	Ainnocence	AIN1-48_AINNL0048	Lot# MB15NO4148	TC00820838	P018	0.0003516	ng/ml	3275	0.51							20220127_SR2DLT_Ab
AB01974210	01	Ainno_16251	Ainnocence	AIN1-48_AINNL0048	Lot# MB15NO4148	TC00820837	P018	0.0003516	ng/ml	3350	1.15							20220127_SR2DLT_Ab
AB01974210	01	Ainno_16251	Ainnocence	AIN1-48_AINNL0048	Lot# MB15NO4148	TC00820838	P019	0.0001113	ng/ml	3825	1.26							20220127_SR2DLT_Ab
AB01974210	01	Ainno_16251	Ainnocence	AIN1-48_AINNL0048	Lot# MB15NO4148	TC00820837	P019	0.0001113	ng/ml	3150	0.86							20220127_SR2DLT_Ab
AB01974210	01	Ainno_16251	Ainnocence	AIN1-48_AINNL0048	Lot# MB15NO4148	TC00820838	P020	3.521e-05	ng/ml	3525	0.85							20220127_SR2DLT_Ab
AB01974210	01	Ainno_16251	Ainnocence	AIN1-48_AINNL0048	Lot# MB15NO4148	TC00820837	P020	3.521e-05	ng/ml	2875	0.47							20220127_SR2DLT_Ab
AB01974210	01	Ainno_16251	Ainnocence	AIN1-48_AINNL0048	Lot# MB15NO4148	TC00820838	P021	1.114e-05	ng/ml	2725	-0.25							20220127_SR2DLT_Ab
AB01974210	01	Ainno_16251	Ainnocence	AIN1-48_AINNL0048	Lot# MB15NO4148	TC00820837	P021	1.114e-05	ng/ml	3000	0.65							20220127_SR2DLT_Ab
AB01974210	01	Ainno_16251	Ainnocence	AIN1-48_AINNL0048	Lot# MB15NO4148	TC00820838	P022	3.526e-06	ng/ml	4900	2.74							20220127_SR2DLT_Ab
AB01974210	01	Ainno_16251	Ainnocence	AIN1-48_AINNL0048	Lot# MB15NO4148	TC00820837	P022	3.526e-06	ng/ml	3375	1.18							20220127_SR2DLT_Ab
AB01974211	01	Ainno_16251	Ainnocence	AIN1-49_AINNL0049	Lot# MB15NO4149	TC00820841	A003	11220	ng/ml	72875	99.41	89.647	Active	3.41	13.56	15.56	40	20220127_SR2DLT_Ab
AB01974211	01	Ainno_16251	Ainnocence	AIN1-49_AINNL0049	Lot# MB15NO4149	TC00820840	A003	11220	ng/ml	74650	102.22							20220127_SR2DLT_Ab
AB01974211	01	Ainno_16251	Ainnocence	AIN1-49_AINNL0049	Lot# MB15NO4149	TC00820841	A004	3551	ng/ml	77075	105.33							20220127_SR2DLT_Ab
AB01974211	01	Ainno_16251	Ainnocence	AIN1-49_AINNL0049	Lot# MB15NO4149	TC00820840	A004	3551	ng/ml	77650	106.46							20220127_SR2DLT_Ab
AB01974211	01	Ainno_16251	Ainnocence	AIN1-49_AINNL0049	Lot# MB15NO4149	TC00820841	A005	1124	ng/ml	72650	99.1							20220127_SR2DLT_Ab
AB01974211	01	Ainno_16251	Ainnocence	AIN1-49_AINNL0049	Lot# MB15NO4149	TC00820840	A005	1124	ng/ml	84400	115.99							20220127_SR2DLT_Ab
AB01974211	01	Ainno_16251	Ainnocence	AIN1-49_AINNL0049	Lot# MB15NO4149	TC00820841	A006	355.6	ng/ml	75150	102.62							20220127_SR2DLT_Ab
AB01974211	01	Ainno_16251	Ainnocence	AIN1-49_AINNL0049	Lot# MB15NO4149	TC00820840	A006	355.6	ng/ml	122225	169.39							20220127_SR2DLT_Ab
AB01974211	01	Ainno_16251	Ainnocence	AIN1-49_AINNL0049	Lot# MB15NO4149	TC00820841	A007	112.5	ng/ml	68375	93.07							20220127_SR2DLT_Ab
AB01974211	01	Ainno_16251	Ainnocence	AIN1-49_AINNL0049	Lot# MB15NO4149	TC00820840	A007	112.5	ng/ml	29375	38.3							20220127_SR2DLT_Ab
AB01974211	01	Ainno_16251	Ainnocence	AIN1-49_AINNL0049	Lot# MB15NO4149	TC00820841	A008	35.61	ng/ml	13475	15.72							20220127_SR2DLT_Ab
AB01974211	01	Ainno_16251	Ainnocence	AIN1-49_AINNL0049	Lot# MB15NO4149	TC00820840	A008	35.61	ng/ml	8300	8.54							20220127_SR2DLT_Ab
AB01974211	01	Ainno_16251	Ainnocence	AIN1-49_AINNL0049	Lot# MB15NO4149	TC00820841	A009	11.27	ng/ml	4450	3.01							20220127_SR2DLT_Ab
AB01974211	01	Ainno_16251	Ainnocence	AIN1-49_AINNL0049	Lot# MB15NO4149	TC00820840	A009	11.27	ng/ml	2975	1.03							20220127_SR2DLT_Ab
AB01974211	01	Ainno_16251	Ainnocence	AIN1-49_AINNL0049	Lot# MB15NO4149	TC00820841	A010	3.566	ng/ml	4200	2.65							20220127_SR2DLT_Ab
AB01974211	01	Ainno_16251	Ainnocence	AIN1-49_AINNL0049	Lot# MB15NO4149	TC00820840	A010	3.566	ng/ml	3150	1.27							20220127_SR2DLT_Ab
AB01974211	01	Ainno_16251	Ainnocence	AIN1-49_AINNL0049	Lot# MB15NO4149	TC00820841	A011	1.128	ng/ml	2550	0.33							20220127_SR2DLT_Ab
AB01974211	01	Ainno_16251	Ainnocence	AIN1-49_AINNL0049	Lot# MB15NO4149	TC00820840	A011	1.128	ng/ml	1650	-0.84							20220127_SR2DLT_Ab
AB01974211	01	Ainno_16251	Ainnocence	AIN1-49_AINNL0049	Lot# MB15NO4149	TC00820841	A012	0.3571	ng/ml	1975	-0.48							20220127_SR2DLT_Ab
AB01974211	01	Ainno_16251	Ainnocence	AIN1-49_AINNL0049	Lot# MB15NO4149	TC00820840	A012	0.3571	ng/ml	2600	0.5							20220127_SR2DLT_Ab
AB01974211	01	Ainno_16251	Ainnocence	AIN1-49_AINNL0049	Lot# MB15NO4149	TC00820841	A013	0.113	ng/ml	1625	-0.97							20220127_SR2DLT_Ab
AB01974211	01	Ainno_16251	Ainnocence	AIN1-49_AINNL0049	Lot# MB15NO4149	TC00820840	A013	0.113	ng/ml	2425	0.25							20220127_SR2DLT_Ab
AB01974211	01	Ainno_16251	Ainnocence	AIN1-49_AINNL0049	Lot# MB15NO4149	TC00820841	A014	0.03576	ng/ml	2850	0.75							20220127_SR2DLT_Ab
AB01974211	01	Ainno_16251	Ainnocence	AIN1-49_AINNL0049	Lot# MB15NO4149	TC00820840	A014	0.03576	ng/ml	2150	-0.14							20220127_SR2DLT_Ab
AB01974211	01	Ainno_16251	Ainnocence	AIN1-49_AINNL0049	Lot# MB15NO4149	TC00820841	A015	0.01132	ng/ml	1825	-0.69							20220127_SR2DLT_Ab
AB01974211	01	Ainno_16251	Ainnocence	AIN1-49_AINNL0049	Lot# MB15NO4149	TC00820840	A015	0.01132	ng/ml	1750	-0.7							20220127_SR2DLT_Ab
AB01974211	01	Ainno_16251	Ainnocence	AIN1-49_AINNL0049	Lot# MB15NO4149	TC00820841	A016	0.003581	ng/ml	2700	0.54							20220127_SR2DLT_Ab
AB01974211	01	Ainno_16251	Ainnocence	AIN1-49_AINNL0049	Lot# MB15NO4149	TC00820840	A016	0.003581	ng/ml	3050	1.13							20220127_SR2DLT_Ab
AB01974211	01	Ainno_16251	Ainnocence	AIN1-49_AINNL0049	Lot# MB15NO4149	TC00820841	A017	0.001133	ng/ml	2450	0.19							20220127_SR2DLT_Ab
AB01974211	01	Ainno_16251	Ainnocence	AIN1-49_AINNL0049	Lot# MB15NO4149	TC00820840	A017	0.001133	ng/ml	2525	0.39							20220127_SR2DLT_Ab
AB01974211	01	Ainno_16251	Ainnocence	AIN1-49_AINNL0049	Lot# MB15NO4149	TC00820841	A018	0.0003587	ng/ml	3350	1.46							20220127_SR2DLT_Ab
AB01974211	01	Ainno_16251	Ainnocence	AIN1-49_AINNL0049	Lot# MB15NO4149	TC00820840	A018	0.0003587	ng/ml	2425	0.25							20220127_SR2DLT_Ab
AB01974211	01	Ainno_16251	Ainnocence	AIN1-49_AINNL0049	Lot# MB15NO4149	TC00820841	A019	0.0001135	ng/ml	2125	-0.27							20220127_SR2DLT_Ab
AB01974211	01	Ainno_16251	Ainnocence	AIN1-49_AINNL0049	Lot# MB15NO4149	TC00820840	A019	0.0001135	ng/ml	2175	-0.1							20220127_SR2DLT_Ab
AB01974211	01	Ainno_16251	Ainnocence	AIN1-49_AINNL0049	Lot# MB15NO4149	TC00820841	A020	3.592e-05	ng/ml	2925	0.86							20220127_SR2DLT_Ab
AB01974211	01	Ainno_16251	Ainnocence	AIN1-49_AINNL0049	Lot# MB15NO4149	TC00820840	A020	3.592e-05	ng/ml	2050	-0.28							20220127_SR2DLT_Ab
AB01974211	01	Ainno_16251	Ainnocence	AIN1-49_AINNL0049	Lot# MB15NO4149	TC00820841	A021	1.137e-05	ng/ml	2300	-0.02							20220127_SR2DLT_Ab
AB01974211	01	Ainno_16251	Ainnocence	AIN1-49_AINNL0049	Lot# MB15NO4149	TC00820840	A021	1.137e-05	ng/ml	1975	-0.38							20220127_SR2DLT_Ab
AB01974211	01	Ainno_16251	Ainnocence	AIN1-49_AINNL0049	Lot# MB15NO4149	TC00820841	A022	3.597e-06	ng/ml	3150	1.17							20220127_SR2DLT_Ab
AB01974211	01	Ainno_16251	Ainnocence	AIN1-49_AINNL0049	Lot# MB15NO4149	TC00820840	A022	3.597e-06	ng/ml	2400	0.22							20220127_SR2DLT_Ab
AB01974212	01	Ainno_16251	Ainnocence	AIN1-50_AINNL0050	Lot# MB15NO4150	TC00820841	B003	11220	ng/ml	77650	106.14	89.943	Active	1.91	3.58	4.31	40	20220127_SR2DLT_Ab
AB01974212	01	Ainno_16251	Ainnocence	AIN1-50_AINNL0050	Lot# MB15NO4150	TC00820840	B003	11220	ng/ml	75375	103.24							20220127_SR2DLT_Ab
AB01974212	01	Ainno_16251	Ainnocence	AIN1-50_AINNL0050	Lot# MB15NO4150	TC00820841	B004	3551	ng/ml	76375	104.35							20220127_SR2DLT_Ab
AB01974212	01	Ainno_16251	Ainnocence	AIN1-50_AINNL0050	Lot# MB15NO4150	TC00820840	B004	3551	ng/ml	79150	108.57							20220127_SR2DLT_Ab
AB01974212	01	Ainno_16251	Ainnocence	AIN1-50_AINNL0050	Lot# MB15NO4150	TC00820841	B005	1124	ng/ml	77125	105.4							20220127_SR2DLT_Ab
AB01974212	01	Ainno_16251	Ainnocence	AIN1-50_AINNL0050	Lot# MB15NO4150	TC00820840	B005	1124	ng/ml	75425	103.31							20220127_SR2DLT_Ab
AB01974212	01	Ainno_16251	Ainnocence	AIN1-50_AINNL0050	Lot# MB15NO4150	TC00820841	B006	355.6	ng/ml	73425	100.19							20220127_SR2DLT_Ab
AB01974212	01	Ainno_16251	Ainnocence	AIN1-50_AINNL0050	Lot# MB15NO4150	TC00820840	B006	355.6	ng/ml	70550	96.43							20220127_SR2DLT_Ab
AB01974212	01	Ainno_16251	Ainnocence	AIN1-50_AINNL0050	Lot# MB15NO4150	TC00820841	B007	112.5	ng/ml	49325	66.23							20220127_SR2DLT_Ab
AB01974212	01	Ainno_16251	Ainnocence	AIN1-50_AINNL0050	Lot# MB15NO4150	TC00820840	B007	112.5	ng/ml	36875	48.89							20220127_SR2DLT_Ab
AB01974212	01	Ainno_16251	Ainnocence	AIN1-50_AINNL0050	Lot# MB15NO4150	TC00820841	B008	35.61	ng/ml	14775	17.55							20220127_SR2DLT_Ab
AB01974212	01	Ainno_16251	Ainnocence	AIN1-50_AINNL0050	Lot# MB15NO4150	TC00820840	B008	35.61	ng/ml	13475	15.85							20220127_SR2DLT_Ab
AB01974212	01	Ainno_16251	Ainnocence	AIN1-50_AINNL0050	Lot# MB15NO4150	TC00820841	B009	11.27	ng/ml	7900	7.87							20220127_SR2DLT_Ab
AB01974212	01	Ainno_16251	Ainnocence	AIN1-50_AINNL0050	Lot# MB15NO4150	TC00820840	B009	11.27	ng/ml	5200	4.17							20220127_SR2DLT_Ab
AB01974212	01	Ainno_16251	Ainnocence	AIN1-50_AINNL0050	Lot# MB15NO4150	TC00820841	B010	3.566	ng/ml	2450	0.19							20220127_SR2DLT_Ab
AB01974212	01	Ainno_16251	Ainnocence	AIN1-50_AINNL0050	Lot# MB15NO4150	TC00820840	B010	3.566	ng/ml	2500	0.36							20220127_SR2DLT_Ab
AB01974212	01	Ainno_16251	Ainnocence	AIN1-50_AINNL0050	Lot# MB15NO4150	TC00820841	B011	1.128	ng/ml	2075	-0.34							20220127_SR2DLT_Ab
AB01974212	01	Ainno_16251	Ainnocence	AIN1-50_AINNL0050	Lot# MB15NO4150	TC00820840	B011	1.128	ng/ml	3100	1.2							20220127_SR2DLT_Ab
AB01974212	01	Ainno_16251	Ainnocence	AIN1-50_AINNL0050	Lot# MB15NO4150	TC00820841	B012	0.3571	ng/ml	2650	0.47							20220127_SR2DLT_Ab
AB01974212	01	Ainno_16251	Ainnocence	AIN1-50_AINNL0050	Lot# MB15NO4150	TC00820840	B012	0.3571	ng/ml	2425	0.25							20220127_SR2DLT_Ab
AB01974212	01	Ainno_16251	Ainnocence	AIN1-50_AINNL0050	Lot# MB15NO4150	TC00820841	B013	0.113	ng/ml	2575	0.36							20220127_SR2DLT_Ab
AB01974212	01	Ainno_16251	Ainnocence	AIN1-50_AINNL0050	Lot# MB15NO4150	TC00820840	B013	0.113	ng/ml	1825	-0.6							20220127_SR2DLT_Ab
AB01974212	01	Ainno_16251	Ainnocence	AIN1-50_AINNL0050	Lot# MB15NO4150	TC00820841	B014	0.03576	ng/ml	2050	-0.38							20220127_SR2DLT_Ab
AB01974212	01	Ainno_16251	Ainnocence	AIN1-50_AINNL0050	Lot# MB15NO4150	TC00820840	B014	0.03576	ng/ml	1775	-0.67							20220127_SR2DLT_Ab
AB01974212	01	Ainno_16251	Ainnocence	AIN1-50_AINNL0050	Lot# MB15NO4150	TC00820841	B015	0.01132	ng/ml	2300	-0.02							20220127_SR2DLT_Ab
AB01974212	01	Ainno_16251	Ainnocence	AIN1-50_AINNL0050	Lot# MB15NO4150	TC00820840	B015	0.01132	ng/ml	3075	1.17							20220127_SR2DLT_Ab
AB01974212	01	Ainno_16251	Ainnocence	AIN1-50_AINNL0050	Lot# MB15NO4150	TC00820841	B016	0.003581	ng/ml	2275	-0.06							20220127_SR2DLT_Ab
AB01974212	01	Ainno_16251	Ainnocence	AIN1-50_AINNL0050	Lot# MB15NO4150	TC00820840	B016	0.003581	ng/ml	2825	0.82							20220127_SR2DLT_Ab
AB01974212	01	Ainno_16251	Ainnocence	AIN1-50_AINNL0050	Lot# MB15NO4150	TC00820841	B017	0.001133	ng/ml	2475	0.22							20220127_SR2DLT_Ab
AB01974212	01	Ainno_16251	Ainnocence	AIN1-50_AINNL0050	Lot# MB15NO4150	TC00820840	B017	0.001133	ng/ml	2250	0							20220127_SR2DLT_Ab
AB01974212	01	Ainno_16251	Ainnocence	AIN1-50_AINNL0050	Lot# MB15NO4150	TC00820841	B018	0.0003587	ng/ml	3150	1.17							20220127_SR2DLT_Ab
AB01974212	01	Ainno_16251	Ainnocence	AIN1-50_AINNL0050	Lot# MB15NO4150	TC00820840	B018	0.0003587	ng/ml	2200	-0.07							20220127_SR2DLT_Ab
AB01974212	01	Ainno_16251	Ainnocence	AIN1-50_AINNL0050	Lot# MB15NO4150	TC00820841	B019	0.0001135	ng/ml	2275	-0.06							20220127_SR2DLT_Ab
AB01974212	01	Ainno_16251	Ainnocence	AIN1-50_AINNL0050	Lot# MB15NO4150	TC00820840	B019	0.0001135	ng/ml	2625	0.53							20220127_SR2DLT_Ab
AB01974212	01	Ainno_16251	Ainnocence	AIN1-50_AINNL0050	Lot# MB15NO4150	TC00820841	B020	3.592e-05	ng/ml	1450	-1.22							20220127_SR2DLT_Ab
AB01974212	01	Ainno_16251	Ainnocence	AIN1-50_AINNL0050	Lot# MB15NO4150	TC00820840	B020	3.592e-05	ng/ml	1975	-0.38							20220127_SR2DLT_Ab
AB01974212	01	Ainno_16251	Ainnocence	AIN1-50_AINNL0050	Lot# MB15NO4150	TC00820841	B021	1.137e-05	ng/ml	2025	-0.41							20220127_SR2DLT_Ab
AB01974212	01	Ainno_16251	Ainnocence	AIN1-50_AINNL0050	Lot# MB15NO4150	TC00820840	B021	1.137e-05	ng/ml	2450	0.29							20220127_SR2DLT_Ab
AB01974212	01	Ainno_16251	Ainnocence	AIN1-50_AINNL0050	Lot# MB15NO4150	TC00820841	B022	3.597e-06	ng/ml	2925	0.86							20220127_SR2DLT_Ab
AB01974212	01	Ainno_16251	Ainnocence	AIN1-50_AINNL0050	Lot# MB15NO4150	TC00820840	B022	3.597e-06	ng/ml	2725	0.67							20220127_SR2DLT_Ab
AB01974213	01	Ainno_16251	Ainnocence	AIN1-16_AINNL0016	Lot# MB15NO4116	TC00820841	C003	11440	ng/ml	2700	0.54	>11440	Inactive	1	0.81		40	20220127_SR2DLT_Ab
AB01974213	01	Ainno_16251	Ainnocence	AIN1-16_AINNL0016	Lot# MB15NO4116	TC00820840	C003	11440	ng/ml	2200	-0.07							20220127_SR2DLT_Ab
AB01974213	01	Ainno_16251	Ainnocence	AIN1-16_AINNL0016	Lot# MB15NO4116	TC00820841	C004	3620	ng/ml	1900	-0.59							20220127_SR2DLT_Ab
AB01974213	01	Ainno_16251	Ainnocence	AIN1-16_AINNL0016	Lot# MB15NO4116	TC00820840	C004	3620	ng/ml	2050	-0.28							20220127_SR2DLT_Ab
AB01974213	01	Ainno_16251	Ainnocence	AIN1-16_AINNL0016	Lot# MB15NO4116	TC00820841	C005	1146	ng/ml	2450	0.19							20220127_SR2DLT_Ab
AB01974213	01	Ainno_16251	Ainnocence	AIN1-16_AINNL0016	Lot# MB15NO4116	TC00820840	C005	1146	ng/ml	2200	-0.07							20220127_SR2DLT_Ab
AB01974213	01	Ainno_16251	Ainnocence	AIN1-16_AINNL0016	Lot# MB15NO4116	TC00820841	C006	362.5	ng/ml	2650	0.47							20220127_SR2DLT_Ab
AB01974213	01	Ainno_16251	Ainnocence	AIN1-16_AINNL0016	Lot# MB15NO4116	TC00820840	C006	362.5	ng/ml	2800	0.78							20220127_SR2DLT_Ab
AB01974213	01	Ainno_16251	Ainnocence	AIN1-16_AINNL0016	Lot# MB15NO4116	TC00820841	C007	114.7	ng/ml	2075	-0.34							20220127_SR2DLT_Ab
AB01974213	01	Ainno_16251	Ainnocence	AIN1-16_AINNL0016	Lot# MB15NO4116	TC00820840	C007	114.7	ng/ml	1925	-0.46							20220127_SR2DLT_Ab
AB01974213	01	Ainno_16251	Ainnocence	AIN1-16_AINNL0016	Lot# MB15NO4116	TC00820841	C008	36.31	ng/ml	2675	0.51							20220127_SR2DLT_Ab
AB01974213	01	Ainno_16251	Ainnocence	AIN1-16_AINNL0016	Lot# MB15NO4116	TC00820840	C008	36.31	ng/ml	2225	-0.03							20220127_SR2DLT_Ab
AB01974213	01	Ainno_16251	Ainnocence	AIN1-16_AINNL0016	Lot# MB15NO4116	TC00820841	C009	11.49	ng/ml	2175	-0.2							20220127_SR2DLT_Ab
AB01974213	01	Ainno_16251	Ainnocence	AIN1-16_AINNL0016	Lot# MB15NO4116	TC00820840	C009	11.49	ng/ml	2600	0.5							20220127_SR2DLT_Ab
AB01974213	01	Ainno_16251	Ainnocence	AIN1-16_AINNL0016	Lot# MB15NO4116	TC00820841	C010	3.636	ng/ml	1975	-0.48							20220127_SR2DLT_Ab
AB01974213	01	Ainno_16251	Ainnocence	AIN1-16_AINNL0016	Lot# MB15NO4116	TC00820840	C010	3.636	ng/ml	2500	0.36							20220127_SR2DLT_Ab
AB01974213	01	Ainno_16251	Ainnocence	AIN1-16_AINNL0016	Lot# MB15NO4116	TC00820841	C011	1.151	ng/ml	1900	-0.59							20220127_SR2DLT_Ab
AB01974213	01	Ainno_16251	Ainnocence	AIN1-16_AINNL0016	Lot# MB15NO4116	TC00820840	C011	1.151	ng/ml	2125	-0.17							20220127_SR2DLT_Ab
AB01974213	01	Ainno_16251	Ainnocence	AIN1-16_AINNL0016	Lot# MB15NO4116	TC00820841	C012	0.3641	ng/ml	1725	-0.83							20220127_SR2DLT_Ab
AB01974213	01	Ainno_16251	Ainnocence	AIN1-16_AINNL0016	Lot# MB15NO4116	TC00820840	C012	0.3641	ng/ml	1875	-0.53							20220127_SR2DLT_Ab
AB01974213	01	Ainno_16251	Ainnocence	AIN1-16_AINNL0016	Lot# MB15NO4116	TC00820841	C013	0.1152	ng/ml	4200	2.65							20220127_SR2DLT_Ab
AB01974213	01	Ainno_16251	Ainnocence	AIN1-16_AINNL0016	Lot# MB15NO4116	TC00820840	C013	0.1152	ng/ml	2125	-0.17							20220127_SR2DLT_Ab
AB01974213	01	Ainno_16251	Ainnocence	AIN1-16_AINNL0016	Lot# MB15NO4116	TC00820841	C014	0.03646	ng/ml	3925	2.27							20220127_SR2DLT_Ab
AB01974213	01	Ainno_16251	Ainnocence	AIN1-16_AINNL0016	Lot# MB15NO4116	TC00820840	C014	0.03646	ng/ml	1875	-0.53							20220127_SR2DLT_Ab
AB01974213	01	Ainno_16251	Ainnocence	AIN1-16_AINNL0016	Lot# MB15NO4116	TC00820841	C015	0.01154	ng/ml	1825	-0.69							20220127_SR2DLT_Ab
AB01974213	01	Ainno_16251	Ainnocence	AIN1-16_AINNL0016	Lot# MB15NO4116	TC00820840	C015	0.01154	ng/ml	3150	1.27							20220127_SR2DLT_Ab
AB01974213	01	Ainno_16251	Ainnocence	AIN1-16_AINNL0016	Lot# MB15NO4116	TC00820841	C016	0.003652	ng/ml	2800	0.68							20220127_SR2DLT_Ab
AB01974213	01	Ainno_16251	Ainnocence	AIN1-16_AINNL0016	Lot# MB15NO4116	TC00820840	C016	0.003652	ng/ml	3150	1.27							20220127_SR2DLT_Ab
AB01974213	01	Ainno_16251	Ainnocence	AIN1-16_AINNL0016	Lot# MB15NO4116	TC00820841	C017	0.001156	ng/ml	2850	0.75							20220127_SR2DLT_Ab
AB01974213	01	Ainno_16251	Ainnocence	AIN1-16_AINNL0016	Lot# MB15NO4116	TC00820840	C017	0.001156	ng/ml	2000	-0.35							20220127_SR2DLT_Ab
AB01974213	01	Ainno_16251	Ainnocence	AIN1-16_AINNL0016	Lot# MB15NO4116	TC00820841	C018	0.0003657	ng/ml	2600	0.4							20220127_SR2DLT_Ab
AB01974213	01	Ainno_16251	Ainnocence	AIN1-16_AINNL0016	Lot# MB15NO4116	TC00820840	C018	0.0003657	ng/ml	1725	-0.74							20220127_SR2DLT_Ab
AB01974213	01	Ainno_16251	Ainnocence	AIN1-16_AINNL0016	Lot# MB15NO4116	TC00820841	C019	0.0001157	ng/ml	2025	-0.41							20220127_SR2DLT_Ab
AB01974213	01	Ainno_16251	Ainnocence	AIN1-16_AINNL0016	Lot# MB15NO4116	TC00820840	C019	0.0001157	ng/ml	1700	-0.77							20220127_SR2DLT_Ab
AB01974213	01	Ainno_16251	Ainnocence	AIN1-16_AINNL0016	Lot# MB15NO4116	TC00820841	C020	3.662e-05	ng/ml	2175	-0.2							20220127_SR2DLT_Ab
AB01974213	01	Ainno_16251	Ainnocence	AIN1-16_AINNL0016	Lot# MB15NO4116	TC00820840	C020	3.662e-05	ng/ml	2625	0.53							20220127_SR2DLT_Ab
AB01974213	01	Ainno_16251	Ainnocence	AIN1-16_AINNL0016	Lot# MB15NO4116	TC00820841	C021	1.159e-05	ng/ml	1600	-1.01							20220127_SR2DLT_Ab
AB01974213	01	Ainno_16251	Ainnocence	AIN1-16_AINNL0016	Lot# MB15NO4116	TC00820840	C021	1.159e-05	ng/ml	2200	-0.07							20220127_SR2DLT_Ab
AB01974213	01	Ainno_16251	Ainnocence	AIN1-16_AINNL0016	Lot# MB15NO4116	TC00820841	C022	3.668e-06	ng/ml	2775	0.65							20220127_SR2DLT_Ab
AB01974213	01	Ainno_16251	Ainnocence	AIN1-16_AINNL0016	Lot# MB15NO4116	TC00820840	C022	3.668e-06	ng/ml	1950	-0.42							20220127_SR2DLT_Ab
AB01974161	01	Ainno_16251	Ainnocence	AIN2-1_REGN10933	Lot# MB15OC1436	TC00820841	D003	10000	ng/ml	73625	100.47	1.21	Active	8.06	16	6.56	40	20220127_SR2DLT_Ab
[truncated: 79 more rows]

## Sheet: Ctrl Wells
Object ID	Batch	Plate	Well	Data value	% Inhibition	Testset ID
Cell Control	01	TC00820831	A001	63350	104.82	20220127_SR2DLT_Ab
Cell Control	01	TC00820831	A002	63250	104.65	20220127_SR2DLT_Ab
Cell Control	01	TC00820831	B001	68250	113.22	20220127_SR2DLT_Ab
Cell Control	01	TC00820831	B002	67675	112.23	20220127_SR2DLT_Ab
Cell Control	01	TC00820831	C001	63375	104.86	20220127_SR2DLT_Ab
Cell Control	01	TC00820831	C002	63300	104.74	20220127_SR2DLT_Ab
Cell Control	01	TC00820831	D001	71825	119.35	20220127_SR2DLT_Ab
Cell Control	01	TC00820831	D002	65675	108.81	20220127_SR2DLT_Ab
Cell Control	01	TC00820831	E001	63175	104.52	20220127_SR2DLT_Ab
Cell Control	01	TC00820831	E002	66500	110.22	20220127_SR2DLT_Ab
Cell Control	01	TC00820831	F001	62200	102.85	20220127_SR2DLT_Ab
Cell Control	01	TC00820831	F002	63625	105.29	20220127_SR2DLT_Ab
Cell Control	01	TC00820831	G001	43325	70.49	20220127_SR2DLT_Ab
Cell Control	01	TC00820831	G002	48300	79.02	20220127_SR2DLT_Ab
Cell Control	01	TC00820831	H001	44600	72.68	20220127_SR2DLT_Ab
Cell Control	01	TC00820831	H002	42525	69.12	20220127_SR2DLT_Ab
Cell Control	01	TC00820831	I001	61200	101.14	20220127_SR2DLT_Ab
Cell Control	01	TC00820831	I002	57575	94.92	20220127_SR2DLT_Ab
Cell Control	01	TC00820831	J001	59100	97.54	20220127_SR2DLT_Ab
Cell Control	01	TC00820831	J002	59300	97.88	20220127_SR2DLT_Ab
Cell Control	01	TC00820831	K001	56625	93.29	20220127_SR2DLT_Ab
Cell Control	01	TC00820831	K002	55975	92.18	20220127_SR2DLT_Ab
Cell Control	01	TC00820831	L001	55950	92.14	20220127_SR2DLT_Ab
Cell Control	01	TC00820831	L002	60825	100.49	20220127_SR2DLT_Ab
Cell Control	01	TC00820831	M001	66775	110.69	20220127_SR2DLT_Ab
Cell Control	01	TC00820831	M002	64525	106.84	20220127_SR2DLT_Ab
Cell Control	01	TC00820831	N001	61775	102.12	20220127_SR2DLT_Ab
Cell Control	01	TC00820831	N002	63950	105.85	20220127_SR2DLT_Ab
Cell Control	01	TC00820831	O001	61600	101.82	20220127_SR2DLT_Ab
Cell Control	01	TC00820831	O002	66050	109.45	20220127_SR2DLT_Ab
Cell Control	01	TC00820831	P001	62975	104.18	20220127_SR2DLT_Ab
Cell Control	01	TC00820831	P002	62050	102.59	20220127_SR2DLT_Ab
Cell Control	01	TC00820832	A001	73175	99.11	20220127_SR2DLT_Ab
Cell Control	01	TC00820832	A002	75750	102.73	20220127_SR2DLT_Ab
Cell Control	01	TC00820832	B001	73775	99.95	20220127_SR2DLT_Ab
Cell Control	01	TC00820832	B002	76200	103.36	20220127_SR2DLT_Ab
Cell Control	01	TC00820832	C001	73325	99.32	20220127_SR2DLT_Ab
Cell Control	01	TC00820832	C002	72325	97.91	20220127_SR2DLT_Ab
Cell Control	01	TC00820832	D001	73950	100.2	20220127_SR2DLT_Ab
Cell Control	01	TC00820832	D002	80575	109.51	20220127_SR2DLT_Ab
Cell Control	01	TC00820832	E001	73250	99.21	20220127_SR2DLT_Ab
Cell Control	01	TC00820832	E002	74450	100.9	20220127_SR2DLT_Ab
Cell Control	01	TC00820832	F001	64600	87.05	20220127_SR2DLT_Ab
Cell Control	01	TC00820832	F002	66575	89.83	20220127_SR2DLT_Ab
Cell Control	01	TC00820832	G001	76200	103.36	20220127_SR2DLT_Ab
Cell Control	01	TC00820832	G002	78425	106.49	20220127_SR2DLT_Ab
Cell Control	01	TC00820832	H001	74200	100.55	20220127_SR2DLT_Ab
Cell Control	01	TC00820832	H002	76950	104.41	20220127_SR2DLT_Ab
Cell Control	01	TC00820832	I001	77475	105.15	20220127_SR2DLT_Ab
Cell Control	01	TC00820832	I002	77750	105.54	20220127_SR2DLT_Ab
Cell Control	01	TC00820832	J001	72325	97.91	20220127_SR2DLT_Ab
Cell Control	01	TC00820832	J002	75100	101.81	20220127_SR2DLT_Ab
Cell Control	01	TC00820832	K001	77700	105.47	20220127_SR2DLT_Ab
Cell Control	01	TC00820832	K002	80175	108.95	20220127_SR2DLT_Ab
Cell Control	01	TC00820832	L001	76725	104.1	20220127_SR2DLT_Ab
Cell Control	01	TC00820832	L002	76650	103.99	20220127_SR2DLT_Ab
Cell Control	01	TC00820832	M001	72650	98.37	20220127_SR2DLT_Ab
Cell Control	01	TC00820832	M002	73050	98.93	20220127_SR2DLT_Ab
Cell Control	01	TC00820832	N001	69450	93.87	20220127_SR2DLT_Ab
Cell Control	01	TC00820832	N002	71375	96.58	20220127_SR2DLT_Ab
Cell Control	01	TC00820832	O001	71850	97.24	20220127_SR2DLT_Ab
Cell Control	01	TC00820832	O002	71600	96.89	20220127_SR2DLT_Ab
Cell Control	01	TC00820832	P001	68675	92.78	20220127_SR2DLT_Ab
Cell Control	01	TC00820832	P002	65675	88.56	20220127_SR2DLT_Ab
Cell Control	01	TC00820834	A001	80125	106.73	20220127_SR2DLT_Ab
Cell Control	01	TC00820834	A002	72475	96.2	20220127_SR2DLT_Ab
Cell Control	01	TC00820834	B001	82850	110.48	20220127_SR2DLT_Ab
Cell Control	01	TC00820834	B002	83250	111.03	20220127_SR2DLT_Ab
Cell Control	01	TC00820834	C001	74150	98.51	20220127_SR2DLT_Ab
Cell Control	01	TC00820834	C002	70925	94.07	20220127_SR2DLT_Ab
Cell Control	01	TC00820834	D001	76475	101.71	20220127_SR2DLT_Ab
Cell Control	01	TC00820834	D002	78825	104.94	20220127_SR2DLT_Ab
Cell Control	01	TC00820834	E001	72400	96.1	20220127_SR2DLT_Ab
Cell Control	01	TC00820834	E002	75850	100.85	20220127_SR2DLT_Ab
Cell Control	01	TC00820834	F001	66450	87.91	20220127_SR2DLT_Ab
Cell Control	01	TC00820834	F002	70150	93	20220127_SR2DLT_Ab
Cell Control	01	TC00820834	G001	76000	101.06	20220127_SR2DLT_Ab
Cell Control	01	TC00820834	G002	75125	99.85	20220127_SR2DLT_Ab
Cell Control	01	TC00820834	H001	76400	101.61	20220127_SR2DLT_Ab
Cell Control	01	TC00820834	H002	78000	103.81	20220127_SR2DLT_Ab
Cell Control	01	TC00820834	I001	72600	96.38	20220127_SR2DLT_Ab
Cell Control	01	TC00820834	I002	73350	97.41	20220127_SR2DLT_Ab
Cell Control	01	TC00820834	J001	77250	102.78	20220127_SR2DLT_Ab
Cell Control	01	TC00820834	J002	81125	108.11	20220127_SR2DLT_Ab
Cell Control	01	TC00820834	K001	73275	97.31	20220127_SR2DLT_Ab
Cell Control	01	TC00820834	K002	73475	97.58	20220127_SR2DLT_Ab
Cell Control	01	TC00820834	L001	75425	100.26	20220127_SR2DLT_Ab
Cell Control	01	TC00820834	L002	78950	105.12	20220127_SR2DLT_Ab
Cell Control	01	TC00820834	M001	79700	106.15	20220127_SR2DLT_Ab
Cell Control	01	TC00820834	M002	71975	95.52	20220127_SR2DLT_Ab
Cell Control	01	TC00820834	N001	75450	100.3	20220127_SR2DLT_Ab
Cell Control	01	TC00820834	N002	74075	98.41	20220127_SR2DLT_Ab
Cell Control	01	TC00820834	O001	75025	99.71	20220127_SR2DLT_Ab
Cell Control	01	TC00820834	O002	74275	98.68	20220127_SR2DLT_Ab
Cell Control	01	TC00820834	P001	67375	89.19	20220127_SR2DLT_Ab
Cell Control	01	TC00820834	P002	74675	99.23	20220127_SR2DLT_Ab
Cell Control	01	TC00820835	A001	73025	96.97	20220127_SR2DLT_Ab
Cell Control	01	TC00820835	A002	78250	104.17	20220127_SR2DLT_Ab
Cell Control	01	TC00820835	B001	79575	105.99	20220127_SR2DLT_Ab
Cell Control	01	TC00820835	B002	80775	107.65	20220127_SR2DLT_Ab
Cell Control	01	TC00820835	C001	75825	100.82	20220127_SR2DLT_Ab
Cell Control	01	TC00820835	C002	73025	96.97	20220127_SR2DLT_Ab
Cell Control	01	TC00820835	D001	77525	103.17	20220127_SR2DLT_Ab
Cell Control	01	TC00820835	D002	75200	99.96	20220127_SR2DLT_Ab
Cell Control	01	TC00820835	E001	75750	100.72	20220127_SR2DLT_Ab
Cell Control	01	TC00820835	E002	74025	98.34	20220127_SR2DLT_Ab
Cell Control	01	TC00820835	F001	69750	92.45	20220127_SR2DLT_Ab
Cell Control	01	TC00820835	F002	69700	92.38	20220127_SR2DLT_Ab
Cell Control	01	TC00820835	G001	75000	99.69	20220127_SR2DLT_Ab
Cell Control	01	TC00820835	G002	77050	102.51	20220127_SR2DLT_Ab
Cell Control	01	TC00820835	H001	73300	97.34	20220127_SR2DLT_Ab
Cell Control	01	TC00820835	H002	80550	107.34	20220127_SR2DLT_Ab
Cell Control	01	TC00820835	I001	75800	100.79	20220127_SR2DLT_Ab
Cell Control	01	TC00820835	I002	75050	99.76	20220127_SR2DLT_Ab
Cell Control	01	TC00820835	J001	74225	98.62	20220127_SR2DLT_Ab
Cell Control	01	TC00820835	J002	73625	97.79	20220127_SR2DLT_Ab
Cell Control	01	TC00820835	K001	76425	101.65	20220127_SR2DLT_Ab
Cell Control	01	TC00820835	K002	74250	98.65	20220127_SR2DLT_Ab
Cell Control	01	TC00820835	L001	73300	97.34	20220127_SR2DLT_Ab
Cell Control	01	TC00820835	L002	76550	101.82	20220127_SR2DLT_Ab
Cell Control	01	TC00820835	M001	75575	100.48	20220127_SR2DLT_Ab
Cell Control	01	TC00820835	M002	75625	100.55	20220127_SR2DLT_Ab
Cell Control	01	TC00820835	N001	75250	100.03	20220127_SR2DLT_Ab
Cell Control	01	TC00820835	N002	76400	101.62	20220127_SR2DLT_Ab
Cell Control	01	TC00820835	O001	74225	98.62	20220127_SR2DLT_Ab
Cell Control	01	TC00820835	O002	82225	109.65	20220127_SR2DLT_Ab
Cell Control	01	TC00820835	P001	66625	88.15	20220127_SR2DLT_Ab
Cell Control	01	TC00820835	P002	73775	98	20220127_SR2DLT_Ab
Cell Control	01	TC00820837	A001	71025	97.88	20220127_SR2DLT_Ab
Cell Control	01	TC00820837	A002	65675	90.24	20220127_SR2DLT_Ab
Cell Control	01	TC00820837	B001	74375	102.67	20220127_SR2DLT_Ab
Cell Control	01	TC00820837	B002	75850	104.78	20220127_SR2DLT_Ab
Cell Control	01	TC00820837	C001	71025	97.88	20220127_SR2DLT_Ab
Cell Control	01	TC00820837	C002	71375	98.39	20220127_SR2DLT_Ab
Cell Control	01	TC00820837	D001	73675	101.67	20220127_SR2DLT_Ab
Cell Control	01	TC00820837	D002	72425	99.89	20220127_SR2DLT_Ab
Cell Control	01	TC00820837	E001	72800	100.42	20220127_SR2DLT_Ab
Cell Control	01	TC00820837	E002	72875	100.53	20220127_SR2DLT_Ab
Cell Control	01	TC00820837	F001	72725	100.31	20220127_SR2DLT_Ab
Cell Control	01	TC00820837	F002	62325	85.45	20220127_SR2DLT_Ab
Cell Control	01	TC00820837	G001	70300	96.85	20220127_SR2DLT_Ab
Cell Control	01	TC00820837	G002	72325	99.74	20220127_SR2DLT_Ab
Cell Control	01	TC00820837	H001	75325	104.03	20220127_SR2DLT_Ab
Cell Control	01	TC00820837	H002	73475	101.39	20220127_SR2DLT_Ab
Cell Control	01	TC00820837	I001	74500	102.85	20220127_SR2DLT_Ab
Cell Control	01	TC00820837	I002	70525	97.17	20220127_SR2DLT_Ab
Cell Control	01	TC00820837	J001	70350	96.92	20220127_SR2DLT_Ab
Cell Control	01	TC00820837	J002	71350	98.35	20220127_SR2DLT_Ab
Cell Control	01	TC00820837	K001	73125	100.89	20220127_SR2DLT_Ab
Cell Control	01	TC00820837	K002	71775	98.96	20220127_SR2DLT_Ab
Cell Control	01	TC00820837	L001	75750	104.64	20220127_SR2DLT_Ab
Cell Control	01	TC00820837	L002	76950	106.35	20220127_SR2DLT_Ab
Cell Control	01	TC00820837	M001	76750	106.07	20220127_SR2DLT_Ab
Cell Control	01	TC00820837	M002	73975	102.1	20220127_SR2DLT_Ab
Cell Control	01	TC00820837	N001	72550	100.06	20220127_SR2DLT_Ab
Cell Control	01	TC00820837	N002	70925	97.74	20220127_SR2DLT_Ab
Cell Control	01	TC00820837	O001	75150	103.78	20220127_SR2DLT_Ab
Cell Control	01	TC00820837	O002	75150	103.78	20220127_SR2DLT_Ab
Cell Control	01	TC00820837	P001	68950	94.92	20220127_SR2DLT_Ab
Cell Control	01	TC00820837	P002	74800	103.28	20220127_SR2DLT_Ab
Cell Control	01	TC00820838	A001	71025	93.38	20220127_SR2DLT_Ab
Cell Control	01	TC00820838	A002	79400	104.86	20220127_SR2DLT_Ab
Cell Control	01	TC00820838	B001	79950	105.61	20220127_SR2DLT_Ab
Cell Control	01	TC00820838	B002	79400	104.86	20220127_SR2DLT_Ab
Cell Control	01	TC00820838	C001	71025	93.38	20220127_SR2DLT_Ab
Cell Control	01	TC00820838	C002	75600	99.65	20220127_SR2DLT_Ab
Cell Control	01	TC00820838	D001	75225	99.13	20220127_SR2DLT_Ab
Cell Control	01	TC00820838	D002	77250	101.91	20220127_SR2DLT_Ab
Cell Control	01	TC00820838	E001	77100	101.7	20220127_SR2DLT_Ab
Cell Control	01	TC00820838	E002	77225	101.88	20220127_SR2DLT_Ab
Cell Control	01	TC00820838	F001	74025	97.49	20220127_SR2DLT_Ab
Cell Control	01	TC00820838	F002	68525	89.95	20220127_SR2DLT_Ab
Cell Control	01	TC00820838	G001	76950	101.5	20220127_SR2DLT_Ab
Cell Control	01	TC00820838	G002	82450	109.04	20220127_SR2DLT_Ab
Cell Control	01	TC00820838	H001	76450	100.81	20220127_SR2DLT_Ab
Cell Control	01	TC00820838	H002	80400	106.23	20220127_SR2DLT_Ab
Cell Control	01	TC00820838	I001	76975	101.53	20220127_SR2DLT_Ab
Cell Control	01	TC00820838	I002	75325	99.27	20220127_SR2DLT_Ab
Cell Control	01	TC00820838	J001	75750	99.85	20220127_SR2DLT_Ab
Cell Control	01	TC00820838	J002	75600	99.65	20220127_SR2DLT_Ab
Cell Control	01	TC00820838	K001	76075	100.3	20220127_SR2DLT_Ab
Cell Control	01	TC00820838	K002	76400	100.75	20220127_SR2DLT_Ab
Cell Control	01	TC00820838	L001	74425	98.04	20220127_SR2DLT_Ab
Cell Control	01	TC00820838	L002	78700	103.9	20220127_SR2DLT_Ab
Cell Control	01	TC00820838	M001	75525	99.55	20220127_SR2DLT_Ab
Cell Control	01	TC00820838	M002	78575	103.73	20220127_SR2DLT_Ab
Cell Control	01	TC00820838	N001	72850	95.88	20220127_SR2DLT_Ab
Cell Control	01	TC00820838	N002	75725	99.82	20220127_SR2DLT_Ab
Cell Control	01	TC00820838	O001	74825	98.59	20220127_SR2DLT_Ab
Cell Control	01	TC00820838	O002	77325	102.01	20220127_SR2DLT_Ab
Cell Control	01	TC00820838	P001	70450	92.59	20220127_SR2DLT_Ab
Cell Control	01	TC00820838	P002	70875	93.17	20220127_SR2DLT_Ab
Cell Control	01	TC00820840	A001	72125	98.66	20220127_SR2DLT_Ab
Cell Control	01	TC00820840	A002	68900	94.1	20220127_SR2DLT_Ab
Cell Control	01	TC00820840	B001	73775	100.98	20220127_SR2DLT_Ab
Cell Control	01	TC00820840	B002	74025	101.34	20220127_SR2DLT_Ab
Cell Control	01	TC00820840	C001	69225	94.56	20220127_SR2DLT_Ab
Cell Control	01	TC00820840	C002	71850	98.27	20220127_SR2DLT_Ab
Cell Control	01	TC00820840	D001	71550	97.84	20220127_SR2DLT_Ab
Cell Control	01	TC00820840	D002	73850	101.09	20220127_SR2DLT_Ab
Cell Control	01	TC00820840	E001	71650	97.98	20220127_SR2DLT_Ab
Cell Control	01	TC00820840	E002	75575	103.53	20220127_SR2DLT_Ab
Cell Control	01	TC00820840	F001	64775	88.28	20220127_SR2DLT_Ab
Cell Control	01	TC00820840	F002	69450	94.88	20220127_SR2DLT_Ab
Cell Control	01	TC00820840	G001	72925	99.78	20220127_SR2DLT_Ab
Cell Control	01	TC00820840	G002	74150	101.51	20220127_SR2DLT_Ab
Cell Control	01	TC00820840	H001	72175	98.73	20220127_SR2DLT_Ab
Cell Control	01	TC00820840	H002	74525	102.04	20220127_SR2DLT_Ab
Cell Control	01	TC00820840	I001	71100	97.21	20220127_SR2DLT_Ab
Cell Control	01	TC00820840	I002	75075	102.82	20220127_SR2DLT_Ab
Cell Control	01	TC00820840	J001	78375	107.48	20220127_SR2DLT_Ab
Cell Control	01	TC00820840	J002	71250	97.42	20220127_SR2DLT_Ab
Cell Control	01	TC00820840	K001	81000	111.19	20220127_SR2DLT_Ab
Cell Control	01	TC00820840	K002	72100	98.62	20220127_SR2DLT_Ab
Cell Control	01	TC00820840	L001	73875	101.13	20220127_SR2DLT_Ab
Cell Control	01	TC00820840	L002	72725	99.5	20220127_SR2DLT_Ab
Cell Control	01	TC00820840	M001	77950	106.88	20220127_SR2DLT_Ab
Cell Control	01	TC00820840	M002	79300	108.79	20220127_SR2DLT_Ab
Cell Control	01	TC00820840	N001	74250	101.66	20220127_SR2DLT_Ab
Cell Control	01	TC00820840	N002	71050	97.14	20220127_SR2DLT_Ab
Cell Control	01	TC00820840	O001	73350	100.38	20220127_SR2DLT_Ab
Cell Control	01	TC00820840	O002	72400	99.04	20220127_SR2DLT_Ab
Cell Control	01	TC00820840	P001	73375	100.42	20220127_SR2DLT_Ab
Cell Control	01	TC00820840	P002	70775	96.75	20220127_SR2DLT_Ab
Cell Control	01	TC00820841	A001	69900	95.22	20220127_SR2DLT_Ab
Cell Control	01	TC00820841	A002	69775	95.05	20220127_SR2DLT_Ab
Cell Control	01	TC00820841	B001	75750	103.47	20220127_SR2DLT_Ab
Cell Control	01	TC00820841	B002	83525	114.42	20220127_SR2DLT_Ab
Cell Control	01	TC00820841	C001	74025	101.03	20220127_SR2DLT_Ab
Cell Control	01	TC00820841	C002	72425	98.78	20220127_SR2DLT_Ab
Cell Control	01	TC00820841	D001	71800	97.9	20220127_SR2DLT_Ab
Cell Control	01	TC00820841	D002	69750	95.01	20220127_SR2DLT_Ab
Cell Control	01	TC00820841	E001	75650	103.32	20220127_SR2DLT_Ab
Cell Control	01	TC00820841	E002	74500	101.7	20220127_SR2DLT_Ab
Cell Control	01	TC00820841	F001	70975	96.74	20220127_SR2DLT_Ab
Cell Control	01	TC00820841	F002	69525	94.69	20220127_SR2DLT_Ab
Cell Control	01	TC00820841	G001	73175	99.84	20220127_SR2DLT_Ab
Cell Control	01	TC00820841	G002	74850	102.2	20220127_SR2DLT_Ab
Cell Control	01	TC00820841	H001	72100	98.32	20220127_SR2DLT_Ab
Cell Control	01	TC00820841	H002	78000	106.64	20220127_SR2DLT_Ab
Cell Control	01	TC00820841	I001	71375	97.3	20220127_SR2DLT_Ab
Cell Control	01	TC00820841	I002	72125	98.36	20220127_SR2DLT_Ab
Cell Control	01	TC00820841	J001	72025	98.22	20220127_SR2DLT_Ab
Cell Control	01	TC00820841	J002	75325	102.87	20220127_SR2DLT_Ab
Cell Control	01	TC00820841	K001	72075	98.29	20220127_SR2DLT_Ab
Cell Control	01	TC00820841	K002	70800	96.49	20220127_SR2DLT_Ab
Cell Control	01	TC00820841	L001	71475	97.44	20220127_SR2DLT_Ab
Cell Control	01	TC00820841	L002	76000	103.82	20220127_SR2DLT_Ab
Cell Control	01	TC00820841	M001	73800	100.72	20220127_SR2DLT_Ab
Cell Control	01	TC00820841	M002	76950	105.16	20220127_SR2DLT_Ab
Cell Control	01	TC00820841	N001	72600	99.03	20220127_SR2DLT_Ab
Cell Control	01	TC00820841	N002	76200	104.1	20220127_SR2DLT_Ab
Cell Control	01	TC00820841	O001	72400	98.75	20220127_SR2DLT_Ab
Cell Control	01	TC00820841	O002	73175	99.84	20220127_SR2DLT_Ab
Cell Control	01	TC00820841	P001	70600	96.21	20220127_SR2DLT_Ab
Cell Control	01	TC00820841	P002	72650	99.1	20220127_SR2DLT_Ab
Virus Control	01	TC00820831	A023	2900	1.2	20220127_SR2DLT_Ab
Virus Control	01	TC00820831	A024	2200	0	20220127_SR2DLT_Ab
Virus Control	01	TC00820831	B023	2350	0.26	20220127_SR2DLT_Ab
Virus Control	01	TC00820831	B024	1925	-0.47	20220127_SR2DLT_Ab
Virus Control	01	TC00820831	C023	2050	-0.26	20220127_SR2DLT_Ab
Virus Control	01	TC00820831	C024	2075	-0.21	20220127_SR2DLT_Ab
Virus Control	01	TC00820831	D023	1775	-0.73	20220127_SR2DLT_Ab
Virus Control	01	TC00820831	D024	2225	0.04	20220127_SR2DLT_Ab
Virus Control	01	TC00820831	E023	1925	-0.47	20220127_SR2DLT_Ab
Virus Control	01	TC00820831	E024	1975	-0.39	20220127_SR2DLT_Ab
Virus Control	01	TC00820831	F023	2350	0.26	20220127_SR2DLT_Ab
Virus Control	01	TC00820831	F024	1700	-0.86	20220127_SR2DLT_Ab
Virus Control	01	TC00820831	G023	2175	-0.04	20220127_SR2DLT_Ab
Virus Control	01	TC00820831	G024	2275	0.13	20220127_SR2DLT_Ab
Virus Control	01	TC00820831	H023	4000	3.09	20220127_SR2DLT_Ab
Virus Control	01	TC00820831	H024	2225	0.04	20220127_SR2DLT_Ab
Virus Control	01	TC00820831	I023	1775	-0.73	20220127_SR2DLT_Ab
Virus Control	01	TC00820831	I024	1575	-1.07	20220127_SR2DLT_Ab
Virus Control	01	TC00820831	J023	2500	0.51	20220127_SR2DLT_Ab
Virus Control	01	TC00820831	J024	2150	-0.09	20220127_SR2DLT_Ab
Virus Control	01	TC00820831	K023	2275	0.13	20220127_SR2DLT_Ab
Virus Control	01	TC00820831	K024	1850	-0.6	20220127_SR2DLT_Ab
Virus Control	01	TC00820831	L023	3100	1.54	20220127_SR2DLT_Ab
Virus Control	01	TC00820831	L024	2175	-0.04	20220127_SR2DLT_Ab
Virus Control	01	TC00820831	M023	2475	0.47	20220127_SR2DLT_Ab
Virus Control	01	TC00820831	M024	1875	-0.56	20220127_SR2DLT_Ab
Virus Control	01	TC00820831	N023	2200	0	20220127_SR2DLT_Ab
Virus Control	01	TC00820831	N024	1450	-1.29	20220127_SR2DLT_Ab
Virus Control	01	TC00820831	O023	2750	0.94	20220127_SR2DLT_Ab
Virus Control	01	TC00820831	O024	2050	-0.26	20220127_SR2DLT_Ab
Virus Control	01	TC00820831	P023	1875	-0.56	20220127_SR2DLT_Ab
Virus Control	01	TC00820831	P024	2200	0	20220127_SR2DLT_Ab
Virus Control	01	TC00820832	A023	2775	0.15	20220127_SR2DLT_Ab
Virus Control	01	TC00820832	A024	2800	0.19	20220127_SR2DLT_Ab
Virus Control	01	TC00820832	B023	1900	-1.08	20220127_SR2DLT_Ab
Virus Control	01	TC00820832	B024	2025	-0.9	20220127_SR2DLT_Ab
Virus Control	01	TC00820832	C023	2600	-0.09	20220127_SR2DLT_Ab
Virus Control	01	TC00820832	C024	3175	0.71	20220127_SR2DLT_Ab
Virus Control	01	TC00820832	D023	2875	0.29	20220127_SR2DLT_Ab
Virus Control	01	TC00820832	D024	3025	0.5	20220127_SR2DLT_Ab
Virus Control	01	TC00820832	E023	2050	-0.87	20220127_SR2DLT_Ab
Virus Control	01	TC00820832	E024	3550	1.24	20220127_SR2DLT_Ab
Virus Control	01	TC00820832	F023	2675	0.01	20220127_SR2DLT_Ab
Virus Control	01	TC00820832	F024	2275	-0.55	20220127_SR2DLT_Ab
Virus Control	01	TC00820832	G023	2225	-0.62	20220127_SR2DLT_Ab
Virus Control	01	TC00820832	G024	2450	-0.31	20220127_SR2DLT_Ab
Virus Control	01	TC00820832	H023	2750	0.12	20220127_SR2DLT_Ab
Virus Control	01	TC00820832	H024	2200	-0.66	20220127_SR2DLT_Ab
Virus Control	01	TC00820832	I023	3275	0.85	20220127_SR2DLT_Ab
Virus Control	01	TC00820832	I024	2350	-0.45	20220127_SR2DLT_Ab
Virus Control	01	TC00820832	J023	2800	0.19	20220127_SR2DLT_Ab
Virus Control	01	TC00820832	J024	3225	0.78	20220127_SR2DLT_Ab
Virus Control	01	TC00820832	K023	2800	0.19	20220127_SR2DLT_Ab
Virus Control	01	TC00820832	K024	2250	-0.59	20220127_SR2DLT_Ab
Virus Control	01	TC00820832	L023	3225	0.78	20220127_SR2DLT_Ab
Virus Control	01	TC00820832	L024	2300	-0.52	20220127_SR2DLT_Ab
Virus Control	01	TC00820832	M023	2625	-0.06	20220127_SR2DLT_Ab
Virus Control	01	TC00820832	M024	2275	-0.55	20220127_SR2DLT_Ab
Virus Control	01	TC00820832	N023	2675	0.01	20220127_SR2DLT_Ab
Virus Control	01	TC00820832	N024	2150	-0.73	20220127_SR2DLT_Ab
Virus Control	01	TC00820832	O023	2275	-0.55	20220127_SR2DLT_Ab
Virus Control	01	TC00820832	O024	3375	0.99	20220127_SR2DLT_Ab
Virus Control	01	TC00820832	P023	3150	0.68	20220127_SR2DLT_Ab
Virus Control	01	TC00820832	P024	3250	0.82	20220127_SR2DLT_Ab
Virus Control	01	TC00820834	A023	2175	-0.55	20220127_SR2DLT_Ab
Virus Control	01	TC00820834	A024	1775	-1.1	20220127_SR2DLT_Ab
Virus Control	01	TC00820834	B023	2200	-0.51	20220127_SR2DLT_Ab
Virus Control	01	TC00820834	B024	2975	0.55	20220127_SR2DLT_Ab
Virus Control	01	TC00820834	C023	2150	-0.58	20220127_SR2DLT_Ab
Virus Control	01	TC00820834	C024	3200	0.86	20220127_SR2DLT_Ab
Virus Control	01	TC00820834	D023	2550	-0.03	20220127_SR2DLT_Ab
Virus Control	01	TC00820834	D024	2375	-0.27	20220127_SR2DLT_Ab
Virus Control	01	TC00820834	E023	2475	-0.13	20220127_SR2DLT_Ab
Virus Control	01	TC00820834	E024	2000	-0.79	20220127_SR2DLT_Ab
Virus Control	01	TC00820834	F023	3025	0.62	20220127_SR2DLT_Ab
Virus Control	01	TC00820834	F024	1900	-0.92	20220127_SR2DLT_Ab
Virus Control	01	TC00820834	G023	2975	0.55	20220127_SR2DLT_Ab
Virus Control	01	TC00820834	G024	2350	-0.31	20220127_SR2DLT_Ab
Virus Control	01	TC00820834	H023	2800	0.31	20220127_SR2DLT_Ab
Virus Control	01	TC00820834	H024	1975	-0.82	20220127_SR2DLT_Ab
Virus Control	01	TC00820834	I023	2350	-0.31	20220127_SR2DLT_Ab
Virus Control	01	TC00820834	I024	2300	-0.37	20220127_SR2DLT_Ab
Virus Control	01	TC00820834	J023	2425	-0.2	20220127_SR2DLT_Ab
Virus Control	01	TC00820834	J024	3475	1.24	20220127_SR2DLT_Ab
Virus Control	01	TC00820834	K023	3050	0.66	20220127_SR2DLT_Ab
Virus Control	01	TC00820834	K024	2075	-0.68	20220127_SR2DLT_Ab
Virus Control	01	TC00820834	L023	2475	-0.13	20220127_SR2DLT_Ab
Virus Control	01	TC00820834	L024	2350	-0.31	20220127_SR2DLT_Ab
Virus Control	01	TC00820834	M023	2425	-0.2	20220127_SR2DLT_Ab
Virus Control	01	TC00820834	M024	2825	0.35	20220127_SR2DLT_Ab
Virus Control	01	TC00820834	N023	3575	1.38	20220127_SR2DLT_Ab
Virus Control	01	TC00820834	N024	3825	1.72	20220127_SR2DLT_Ab
Virus Control	01	TC00820834	O023	2350	-0.31	20220127_SR2DLT_Ab
Virus Control	01	TC00820834	O024	2275	-0.41	20220127_SR2DLT_Ab
Virus Control	01	TC00820834	P023	3000	0.59	20220127_SR2DLT_Ab
Virus Control	01	TC00820834	P024	2625	0.07	20220127_SR2DLT_Ab
Virus Control	01	TC00820835	A023	2200	-0.65	20220127_SR2DLT_Ab
Virus Control	01	TC00820835	A024	1875	-1.09	20220127_SR2DLT_Ab
Virus Control	01	TC00820835	B023	2675	0.01	20220127_SR2DLT_Ab
Virus Control	01	TC00820835	B024	1800	-1.2	20220127_SR2DLT_Ab
Virus Control	01	TC00820835	C023	2575	-0.13	20220127_SR2DLT_Ab
Virus Control	01	TC00820835	C024	2900	0.32	20220127_SR2DLT_Ab
Virus Control	01	TC00820835	D023	3000	0.46	20220127_SR2DLT_Ab
Virus Control	01	TC00820835	D024	2125	-0.75	20220127_SR2DLT_Ab
Virus Control	01	TC00820835	E023	2475	-0.27	20220127_SR2DLT_Ab
Virus Control	01	TC00820835	E024	3275	0.84	20220127_SR2DLT_Ab
Virus Control	01	TC00820835	F023	2800	0.18	20220127_SR2DLT_Ab
Virus Control	01	TC00820835	F024	2675	0.01	20220127_SR2DLT_Ab
Virus Control	01	TC00820835	G023	3650	1.35	20220127_SR2DLT_Ab
Virus Control	01	TC00820835	G024	3225	0.77	20220127_SR2DLT_Ab
Virus Control	01	TC00820835	H023	3400	1.01	20220127_SR2DLT_Ab
Virus Control	01	TC00820835	H024	2125	-0.75	20220127_SR2DLT_Ab
Virus Control	01	TC00820835	I023	2575	-0.13	20220127_SR2DLT_Ab
Virus Control	01	TC00820835	I024	2325	-0.47	20220127_SR2DLT_Ab
Virus Control	01	TC00820835	J023	2775	0.15	20220127_SR2DLT_Ab
Virus Control	01	TC00820835	J024	2525	-0.2	20220127_SR2DLT_Ab
Virus Control	01	TC00820835	K023	2900	0.32	20220127_SR2DLT_Ab
Virus Control	01	TC00820835	K024	2200	-0.65	20220127_SR2DLT_Ab
Virus Control	01	TC00820835	L023	3475	1.11	20220127_SR2DLT_Ab
Virus Control	01	TC00820835	L024	2075	-0.82	20220127_SR2DLT_Ab
Virus Control	01	TC00820835	M023	2800	0.18	20220127_SR2DLT_Ab
Virus Control	01	TC00820835	M024	2125	-0.75	20220127_SR2DLT_Ab
Virus Control	01	TC00820835	N023	2000	-0.92	20220127_SR2DLT_Ab
Virus Control	01	TC00820835	N024	2425	-0.34	20220127_SR2DLT_Ab
Virus Control	01	TC00820835	O023	2950	0.39	20220127_SR2DLT_Ab
Virus Control	01	TC00820835	O024	3250	0.8	20220127_SR2DLT_Ab
Virus Control	01	TC00820835	P023	3675	1.39	20220127_SR2DLT_Ab
Virus Control	01	TC00820835	P024	2550	-0.16	20220127_SR2DLT_Ab
Virus Control	01	TC00820837	A023	3400	1.22	20220127_SR2DLT_Ab
Virus Control	01	TC00820837	A024	2125	-0.6	20220127_SR2DLT_Ab
Virus Control	01	TC00820837	B023	2225	-0.46	20220127_SR2DLT_Ab
Virus Control	01	TC00820837	B024	1875	-0.96	20220127_SR2DLT_Ab
Virus Control	01	TC00820837	C023	1750	-1.14	20220127_SR2DLT_Ab
Virus Control	01	TC00820837	C024	2325	-0.32	20220127_SR2DLT_Ab
Virus Control	01	TC00820837	D023	3000	0.65	20220127_SR2DLT_Ab
Virus Control	01	TC00820837	D024	2250	-0.42	20220127_SR2DLT_Ab
Virus Control	01	TC00820837	E023	2625	0.11	20220127_SR2DLT_Ab
Virus Control	01	TC00820837	E024	2550	0.01	20220127_SR2DLT_Ab
Virus Control	01	TC00820837	F023	2550	0.01	20220127_SR2DLT_Ab
Virus Control	01	TC00820837	F024	2800	0.36	20220127_SR2DLT_Ab
Virus Control	01	TC00820837	G023	2550	0.01	20220127_SR2DLT_Ab
Virus Control	01	TC00820837	G024	3175	0.9	20220127_SR2DLT_Ab
Virus Control	01	TC00820837	H023	3550	1.44	20220127_SR2DLT_Ab
Virus Control	01	TC00820837	H024	2800	0.36	20220127_SR2DLT_Ab
Virus Control	01	TC00820837	I023	3050	0.72	20220127_SR2DLT_Ab
Virus Control	01	TC00820837	I024	1750	-1.14	20220127_SR2DLT_Ab
Virus Control	01	TC00820837	J023	2425	-0.17	20220127_SR2DLT_Ab
Virus Control	01	TC00820837	J024	2325	-0.32	20220127_SR2DLT_Ab
Virus Control	01	TC00820837	K023	2950	0.58	20220127_SR2DLT_Ab
Virus Control	01	TC00820837	K024	1825	-1.03	20220127_SR2DLT_Ab
Virus Control	01	TC00820837	L023	3100	0.79	20220127_SR2DLT_Ab
Virus Control	01	TC00820837	L024	2275	-0.39	20220127_SR2DLT_Ab
Virus Control	01	TC00820837	M023	1875	-0.96	20220127_SR2DLT_Ab
Virus Control	01	TC00820837	M024	2200	-0.49	20220127_SR2DLT_Ab
Virus Control	01	TC00820837	N023	2450	-0.14	20220127_SR2DLT_Ab
Virus Control	01	TC00820837	N024	2975	0.61	20220127_SR2DLT_Ab
Virus Control	01	TC00820837	O023	2950	0.58	20220127_SR2DLT_Ab
Virus Control	01	TC00820837	O024	2575	0.04	20220127_SR2DLT_Ab
Virus Control	01	TC00820837	P023	2200	-0.49	20220127_SR2DLT_Ab
Virus Control	01	TC00820837	P024	3000	0.65	20220127_SR2DLT_Ab
Virus Control	01	TC00820838	A023	3050	0.2	20220127_SR2DLT_Ab
Virus Control	01	TC00820838	A024	3325	0.58	20220127_SR2DLT_Ab
Virus Control	01	TC00820838	B023	2950	0.06	20220127_SR2DLT_Ab
Virus Control	01	TC00820838	B024	2225	-0.93	20220127_SR2DLT_Ab
Virus Control	01	TC00820838	C023	3750	1.16	20220127_SR2DLT_Ab
Virus Control	01	TC00820838	C024	2975	0.1	20220127_SR2DLT_Ab
Virus Control	01	TC00820838	D023	2475	-0.59	20220127_SR2DLT_Ab
Virus Control	01	TC00820838	D024	2400	-0.69	20220127_SR2DLT_Ab
Virus Control	01	TC00820838	E023	2750	-0.21	20220127_SR2DLT_Ab
Virus Control	01	TC00820838	E024	3375	0.64	20220127_SR2DLT_Ab
Virus Control	01	TC00820838	F023	2775	-0.18	20220127_SR2DLT_Ab
Virus Control	01	TC00820838	F024	3275	0.51	20220127_SR2DLT_Ab
Virus Control	01	TC00820838	G023	3475	0.78	20220127_SR2DLT_Ab
Virus Control	01	TC00820838	G024	3000	0.13	20220127_SR2DLT_Ab
Virus Control	01	TC00820838	H023	2650	-0.35	20220127_SR2DLT_Ab
Virus Control	01	TC00820838	H024	2925	0.03	20220127_SR2DLT_Ab
Virus Control	01	TC00820838	I023	2450	-0.62	20220127_SR2DLT_Ab
Virus Control	01	TC00820838	I024	2875	-0.04	20220127_SR2DLT_Ab
Virus Control	01	TC00820838	J023	2250	-0.9	20220127_SR2DLT_Ab
Virus Control	01	TC00820838	J024	2850	-0.07	20220127_SR2DLT_Ab
Virus Control	01	TC00820838	K023	3025	0.16	20220127_SR2DLT_Ab
Virus Control	01	TC00820838	K024	3275	0.51	20220127_SR2DLT_Ab
Virus Control	01	TC00820838	L023	2450	-0.62	20220127_SR2DLT_Ab
Virus Control	01	TC00820838	L024	2950	0.06	20220127_SR2DLT_Ab
Virus Control	01	TC00820838	M023	3225	0.44	20220127_SR2DLT_Ab
Virus Control	01	TC00820838	M024	3700	1.09	20220127_SR2DLT_Ab
Virus Control	01	TC00820838	N023	2575	-0.45	20220127_SR2DLT_Ab
Virus Control	01	TC00820838	N024	2950	0.06	20220127_SR2DLT_Ab
Virus Control	01	TC00820838	O023	2750	-0.21	20220127_SR2DLT_Ab
Virus Control	01	TC00820838	O024	2250	-0.9	20220127_SR2DLT_Ab
Virus Control	01	TC00820838	P023	3100	0.27	20220127_SR2DLT_Ab
Virus Control	01	TC00820838	P024	2900	-0.01	20220127_SR2DLT_Ab
Virus Control	01	TC00820840	A023	2400	0.22	20220127_SR2DLT_Ab
Virus Control	01	TC00820840	A024	1650	-0.84	20220127_SR2DLT_Ab
Virus Control	01	TC00820840	B023	2650	0.57	20220127_SR2DLT_Ab
Virus Control	01	TC00820840	B024	2250	0	20220127_SR2DLT_Ab
Virus Control	01	TC00820840	C023	1750	-0.7	20220127_SR2DLT_Ab
Virus Control	01	TC00820840	C024	2350	0.14	20220127_SR2DLT_Ab
Virus Control	01	TC00820840	D023	2650	0.57	20220127_SR2DLT_Ab
Virus Control	01	TC00820840	D024	2025	-0.31	20220127_SR2DLT_Ab
Virus Control	01	TC00820840	E023	1825	-0.6	20220127_SR2DLT_Ab
Virus Control	01	TC00820840	E024	3025	1.1	20220127_SR2DLT_Ab
Virus Control	01	TC00820840	F023	2300	0.07	20220127_SR2DLT_Ab
Virus Control	01	TC00820840	F024	1875	-0.53	20220127_SR2DLT_Ab
Virus Control	01	TC00820840	G023	1775	-0.67	20220127_SR2DLT_Ab
Virus Control	01	TC00820840	G024	2725	0.67	20220127_SR2DLT_Ab
Virus Control	01	TC00820840	H023	2975	1.03	20220127_SR2DLT_Ab
Virus Control	01	TC00820840	H024	2500	0.36	20220127_SR2DLT_Ab
Virus Control	01	TC00820840	I023	2275	0.04	20220127_SR2DLT_Ab
Virus Control	01	TC00820840	I024	2300	0.07	20220127_SR2DLT_Ab
Virus Control	01	TC00820840	J023	2850	0.85	20220127_SR2DLT_Ab
Virus Control	01	TC00820840	J024	2025	-0.31	20220127_SR2DLT_Ab
Virus Control	01	TC00820840	K023	2325	0.11	20220127_SR2DLT_Ab
Virus Control	01	TC00820840	K024	2650	0.57	20220127_SR2DLT_Ab
Virus Control	01	TC00820840	L023	1625	-0.88	20220127_SR2DLT_Ab
Virus Control	01	TC00820840	L024	2250	0	20220127_SR2DLT_Ab
Virus Control	01	TC00820840	M023	1975	-0.38	20220127_SR2DLT_Ab
Virus Control	01	TC00820840	M024	2600	0.5	20220127_SR2DLT_Ab
Virus Control	01	TC00820840	N023	1875	-0.53	20220127_SR2DLT_Ab
Virus Control	01	TC00820840	N024	2400	0.22	20220127_SR2DLT_Ab
Virus Control	01	TC00820840	O023	2275	0.04	20220127_SR2DLT_Ab
Virus Control	01	TC00820840	O024	2125	-0.17	20220127_SR2DLT_Ab
Virus Control	01	TC00820840	P023	1550	-0.98	20220127_SR2DLT_Ab
Virus Control	01	TC00820840	P024	2100	-0.21	20220127_SR2DLT_Ab
Virus Control	01	TC00820841	A023	1825	-0.69	20220127_SR2DLT_Ab
Virus Control	01	TC00820841	A024	2400	0.12	20220127_SR2DLT_Ab
Virus Control	01	TC00820841	B023	2725	0.58	20220127_SR2DLT_Ab
Virus Control	01	TC00820841	B024	1400	-1.29	20220127_SR2DLT_Ab
Virus Control	01	TC00820841	C023	2225	-0.13	20220127_SR2DLT_Ab
Virus Control	01	TC00820841	C024	2175	-0.2	20220127_SR2DLT_Ab
Virus Control	01	TC00820841	D023	1900	-0.59	20220127_SR2DLT_Ab
Virus Control	01	TC00820841	D024	2375	0.08	20220127_SR2DLT_Ab
Virus Control	01	TC00820841	E023	2150	-0.23	20220127_SR2DLT_Ab
Virus Control	01	TC00820841	E024	1950	-0.52	20220127_SR2DLT_Ab
Virus Control	01	TC00820841	F023	2600	0.4	20220127_SR2DLT_Ab
Virus Control	01	TC00820841	F024	2100	-0.3	20220127_SR2DLT_Ab
Virus Control	01	TC00820841	G023	2100	-0.3	20220127_SR2DLT_Ab
Virus Control	01	TC00820841	G024	1550	-1.08	20220127_SR2DLT_Ab
Virus Control	01	TC00820841	H023	2775	0.65	20220127_SR2DLT_Ab
Virus Control	01	TC00820841	H024	2975	0.93	20220127_SR2DLT_Ab
Virus Control	01	TC00820841	I023	2175	-0.2	20220127_SR2DLT_Ab
Virus Control	01	TC00820841	I024	2900	0.82	20220127_SR2DLT_Ab
Virus Control	01	TC00820841	J023	2900	0.82	20220127_SR2DLT_Ab
Virus Control	01	TC00820841	J024	3375	1.49	20220127_SR2DLT_Ab
Virus Control	01	TC00820841	K023	1950	-0.52	20220127_SR2DLT_Ab
Virus Control	01	TC00820841	K024	2500	0.26	20220127_SR2DLT_Ab
Virus Control	01	TC00820841	L023	1725	-0.83	20220127_SR2DLT_Ab
Virus Control	01	TC00820841	L024	2125	-0.27	20220127_SR2DLT_Ab
Virus Control	01	TC00820841	M023	2275	-0.06	20220127_SR2DLT_Ab
Virus Control	01	TC00820841	M024	2450	0.19	20220127_SR2DLT_Ab
Virus Control	01	TC00820841	N023	2525	0.29	20220127_SR2DLT_Ab
Virus Control	01	TC00820841	N024	2825	0.72	20220127_SR2DLT_Ab
Virus Control	01	TC00820841	O023	2700	0.54	20220127_SR2DLT_Ab
Virus Control	01	TC00820841	O024	1950	-0.52	20220127_SR2DLT_Ab
Virus Control	01	TC00820841	P023	1925	-0.55	20220127_SR2DLT_Ab
Virus Control	01	TC00820841	P024	2600	0.4	20220127_SR2DLT_Ab

## Sheet: Batch Ctrl
Plate	Z Analysis	Avg Cell Ctrl	StDev Cell Ctrl	CV Cell Ctrl	Avg Virus Ctrl	StDev Virus Ctrl	CV Virus Ctrl	Testset ID
TC00820831	0.61	60537.5	7076	11.69	2200	483	21.95	20220127_SR2DLT_Ab
TC00820832	0.82	73810.9	3878	5.25	2667.19	452	16.95	20220127_SR2DLT_Ab
TC00820834	0.82	75232.8	3910	5.2	2571.88	502	19.5	20220127_SR2DLT_Ab
TC00820835	0.85	75226.6	3169	4.21	2668.75	517	19.38	20220127_SR2DLT_Ab
TC00820837	0.85	72504.7	3036	4.19	2546.09	483	18.98	20220127_SR2DLT_Ab
TC00820838	0.85	75856.2	3127	4.12	2904.69	400	13.76	20220127_SR2DLT_Ab
TC00820840	0.85	73077.3	3168	4.34	2247.66	395	17.57	20220127_SR2DLT_Ab
TC00820841	0.86	73290.6	2915	3.98	2316.41	449	19.37	20220127_SR2DLT_Ab

## Sheet: Notes
	Abase testset ID:	20220127_SR2DLT_Ab
