# Supplementary material for: AI Designed, Mutation Resistant Broad Neutralizing Antibodies Against Multiple SARS-CoV-2 Strains
Source: Research Square preprint supplement (doi:10.21203/rs.3.rs-5184292/v1), 2025-03-27
Supplement: Supplementary file 22 [file S4b_2022-0127_SARS2_Delta_Ainnocence_Antibodies_TOX_Report.xlsx]

## Sheet: Cmpds DR Graphs
Compound ID	Batch	Library	Supplier	Supplier Id	CC50 (ng/mL)	Graph	Activity Status	Min % Viability	Conc @ Min % Viability	Max % Viability	Conc @ Max % Viability	Number Included Points
AB01974161	01	Ainno_16251	Ainnocence	AIN2-1_REGN10933	>10000		Inactive	90.13	0.0003197	98.84	10000	20
AB01974177	01	Ainno_16251	Ainnocence	AIN1-31_AINNL0031	>9780		Inactive	91.49	0.0003126	104.54	98.08	20
AB01974162	01	Ainno_16251	Ainnocence	AIN2-2_REGN10987	>10000		Inactive	88.74	0.0001012	99.59	10000	20
AB01974210	01	Ainno_16251	Ainnocence	AIN1-48_AINNL0048	>11000		Inactive	91.2	3.521e-05	98.83	3481	20
AB01974191	01	Ainno_16251	Ainnocence	AIN1-42_AINNL0042	>10890		Inactive	91.09	3.491e-06	108.57	0.01098	20
AB01974207	01	Ainno_16251	Ainnocence	AIN1-45_AINNL0045	>11440		Inactive	89.69	3.668e-06	102.73	3620	20
AB01974211	01	Ainno_16251	Ainnocence	AIN1-49_AINNL0049	>11220		Inactive	93.35	0.0003587	103.61	3551	20
AB01974212	01	Ainno_16251	Ainnocence	AIN1-50_AINNL0050	>11220		Inactive	94.01	0.0003587	103.53	1124	20
AB01974205	01	Ainno_16251	Ainnocence	AIN1-43_AINNL0043	>12330		Inactive	91.59	3.953e-06	101.78	390.8	20
AB01974187	01	Ainno_16251	Ainnocence	AIN1-38_AINNL0038	>10890		Inactive	95.64	109.2	101.41	0.0001102	20
AB01974189	01	Ainno_16251	Ainnocence	AIN1-40_AINNL0040	>10780		Inactive	88.33	0.000109	102.83	3.426	20
AB01974209	01	Ainno_16251	Ainnocence	AIN1-47_AINNL0047	>24780		Inactive	90.25	7.933e-05	104.14	0.7887	20
AB01974175	01	Ainno_16251	Ainnocence	AIN1-29_AINNL0029	>10000		Inactive	93.67	100.3	103.62	0.0003197	20
AB01974178	01	Ainno_16251	Ainnocence	AIN1-32_AINNL0032	>10220		Inactive	92.86	0.0001034	100.74	0.001032	20
AB01974172	01	Ainno_16251	Ainnocence	AIN1-22_AINNL0022	>10220		Inactive	96.01	0.03258	106.89	10220	20
AB01974179	01	Ainno_16251	Ainnocence	AIN1-33_AINNL0033	>10670		Inactive	94.19	3.421e-06	107.78	107	20
AB01974188	01	Ainno_16251	Ainnocence	AIN1-39_AINNL0039	>10670		Inactive	90.16	0.0001079	105.9	1069	20
AB01974185	01	Ainno_16251	Ainnocence	AIN1-13_AINNL0013	>10670		Inactive	91.69	0.03401	106.3	3377	20
AB01974186	01	Ainno_16251	Ainnocence	AIN1-15_AINNL0015	>10780		Inactive	91.66	10.83	104.27	0.01087	20
AB01974173	01	Ainno_16251	Ainnocence	AIN1-26_AINNL0026	>10890		Inactive	94.22	1.103e-05	100.95	345.1	20
AB01974190	01	Ainno_16251	Ainnocence	AIN1-41_AINNL0041	>10890		Inactive	93.81	0.1097	104.78	10.94	20
AB01974171	01	Ainno_16251	Ainnocence	AIN1-21_AINNL0021	>11000		Inactive	95.34	3.526e-06	117.1	0.003511	20
AB01974181	01	Ainno_16251	Ainnocence	AIN1-1_AINNL0001	>11000		Inactive	96.28	3.526e-06	109.64	0.1108	20
AB01974170	01	Ainno_16251	Ainnocence	AIN1-18_AINNL0018	>11220		Inactive	91.99	0.003581	107.34	0.3571	20
AB01974206	01	Ainno_16251	Ainnocence	AIN1-44_AINNL0044	>11440		Inactive	92.18	3.662e-05	102.02	11440	20
AB01974213	01	Ainno_16251	Ainnocence	AIN1-16_AINNL0016	>11440		Inactive	92.01	0.0001157	103.51	11440	20
AB01974163	01	Ainno_16251	Ainnocence	AIN1-3_AINNL0003	>11670		Inactive	94	1.182e-05	107.34	0.3714	20
AB01974169	01	Ainno_16251	Ainnocence	AIN1-10_AINNL0010	>11670		Inactive	94.97	0.003725	104.79	0.000373	20
AB01974198	01	Ainno_16251	Ainnocence	AIN1-19_AINNL0019	>11670		Inactive	94.59	3.741e-06	107.64	11.72	20
AB01974194	01	Ainno_16251	Ainnocence	AIN1-17_AINNL0017	>11780		Inactive	91.98	373.3	99.4	0.03755	20
AB01974167	01	Ainno_16251	Ainnocence	AIN1-8_AINNL0008	>11780		Inactive	96.2	0.03755	106.48	11.83	20
AB01974166	01	Ainno_16251	Ainnocence	AIN1-7_AINNL0007	>11780		Inactive	98.79	1.193e-05	113.76	118.1	20
AB01974165	01	Ainno_16251	Ainnocence	AIN1-6_AINNL0006	>11780		Inactive	99.65	0.00376	109.08	0.00119	20
AB01974164	01	Ainno_16251	Ainnocence	AIN1-5_AINNL0005	>11780		Inactive	100.04	0.0001192	119.62	1.193e-05	20
AB01974193	01	Ainno_16251	Ainnocence	AIN1-14_AINNL0014	>11890		Inactive	93.21	0.0379	107.02	0.3784	20
AB01974199	01	Ainno_16251	Ainnocence	AIN1-24_AINNL0024	>12110		Inactive	90.72	1.227e-05	102.69	3.849	20
AB01974168	01	Ainno_16251	Ainnocence	AIN1-9_AINNL0009	>12330		Inactive	97.05	1235	105.42	0.1242	20
AB01974208	01	Ainno_16251	Ainnocence	AIN1-46_AINNL0046	>13110		Inactive	91.65	1.319	104.89	13110	20
AB01974201	01	Ainno_16251	Ainnocence	AIN1-27_AINNL0027	>1440		Inactive	91.12	45.64	102.43	1440	20
AB01974204	01	Ainno_16251	Ainnocence	AIN1-37_AINNL0037	>2110		Inactive	90.47	2.134e-05	116.24	21.16	20
AB01974203	01	Ainno_16251	Ainnocence	AIN1-35_AINNL0035	>2330		Inactive	95.17	0.02347	102	73.84	20
AB01974202	01	Ainno_16251	Ainnocence	AIN1-34_AINNL0034	>2560		Inactive	89.79	8.207e-07	102.51	810.1	20
AB01974197	01	Ainno_16251	Ainnocence	AIN1-23_AINNL0023	>3440		Inactive	95.9	0.01096	107	10.92	20
AB01974195	01	Ainno_16251	Ainnocence	AIN1-12_AINNL0012	>41220		Inactive	96.14	4.176e-05	107.61	1.312	20
AB01974196	01	Ainno_16251	Ainnocence	AIN1-20_AINNL0020	>45220		Inactive	94.6	0.0001448	113.03	45.42	20
AB01974183	01	Ainno_16251	Ainnocence	AIN1-2_AINNL0002	>4780		Inactive	91.48	0.01524	103.44	4780	20
AB01974192	01	Ainno_16251	Ainnocence	AIN1-11_AINNL0011	>5440		Inactive	92.81	5.503e-05	103.7	0.1731	20
AB01974184	01	Ainno_16251	Ainnocence	AIN1-4_AINNL0004	>5670		Inactive	93.92	5.736e-05	107.82	0.1805	20
AB01974200	01	Ainno_16251	Ainnocence	AIN1-25_AINNL0025	>7670		Inactive	95.19	0.007737	107.32	2.455e-05	20
AB01974176	01	Ainno_16251	Ainnocence	AIN1-30_AINNL0030	>8670		Inactive	92.3	2.775e-05	104.11	8.708	20
AB01974180	01	Ainno_16251	Ainnocence	AIN1-36_AINNL0036	>9440		Inactive	100.35	3.026e-06	113.45	0.03009	20
AB01974174	01	Ainno_16251	Ainnocence	AIN1-28_AINNL0028	>9670		Inactive	92.18	3.1e-06	103.7	0.003087	20

## Sheet: Cmpds DR Data
Compound ID	Batch	Library ID	Supplier	Supplier ID	Supplier Batch	Plate ID	Well Ref	Assay Conc	Assay Conc Unit	Lum	% Viability	CC50 (ng/mL)	Activity Status	Curve Fit Hill Slope	Curve Fit Norm Chi2	Curve Fit StDev	Number Included Points	Test ID
AB01974163	01	Ainno_16251	Ainnocence	AIN1-3_AINNL0003	Lot# MB15NO4103	TC00820833	A003	11670	ng/ml	43940	95.78	>11670	Inactive	0.66			20	20220127_SR2DTOX_Ab
AB01974163	01	Ainno_16251	Ainnocence	AIN1-3_AINNL0003	Lot# MB15NO4103	TC00820833	A004	3693	ng/ml	48205	105.09							20220127_SR2DTOX_Ab
AB01974163	01	Ainno_16251	Ainnocence	AIN1-3_AINNL0003	Lot# MB15NO4103	TC00820833	A005	1169	ng/ml	47230	102.96							20220127_SR2DTOX_Ab
AB01974163	01	Ainno_16251	Ainnocence	AIN1-3_AINNL0003	Lot# MB15NO4103	TC00820833	A006	369.8	ng/ml	47330	103.18							20220127_SR2DTOX_Ab
AB01974163	01	Ainno_16251	Ainnocence	AIN1-3_AINNL0003	Lot# MB15NO4103	TC00820833	A007	117	ng/ml	46945	102.34							20220127_SR2DTOX_Ab
AB01974163	01	Ainno_16251	Ainnocence	AIN1-3_AINNL0003	Lot# MB15NO4103	TC00820833	A008	37.04	ng/ml	47500	103.55							20220127_SR2DTOX_Ab
AB01974163	01	Ainno_16251	Ainnocence	AIN1-3_AINNL0003	Lot# MB15NO4103	TC00820833	A009	11.72	ng/ml	47545	103.64							20220127_SR2DTOX_Ab
AB01974163	01	Ainno_16251	Ainnocence	AIN1-3_AINNL0003	Lot# MB15NO4103	TC00820833	A010	3.709	ng/ml	48880	106.56							20220127_SR2DTOX_Ab
AB01974163	01	Ainno_16251	Ainnocence	AIN1-3_AINNL0003	Lot# MB15NO4103	TC00820833	A011	1.174	ng/ml	48000	104.64							20220127_SR2DTOX_Ab
AB01974163	01	Ainno_16251	Ainnocence	AIN1-3_AINNL0003	Lot# MB15NO4103	TC00820833	A012	0.3714	ng/ml	49240	107.34							20220127_SR2DTOX_Ab
AB01974163	01	Ainno_16251	Ainnocence	AIN1-3_AINNL0003	Lot# MB15NO4103	TC00820833	A013	0.1175	ng/ml	47265	103.03							20220127_SR2DTOX_Ab
AB01974163	01	Ainno_16251	Ainnocence	AIN1-3_AINNL0003	Lot# MB15NO4103	TC00820833	A014	0.0372	ng/ml	47175	102.84							20220127_SR2DTOX_Ab
AB01974163	01	Ainno_16251	Ainnocence	AIN1-3_AINNL0003	Lot# MB15NO4103	TC00820833	A015	0.01177	ng/ml	47875	104.37							20220127_SR2DTOX_Ab
AB01974163	01	Ainno_16251	Ainnocence	AIN1-3_AINNL0003	Lot# MB15NO4103	TC00820833	A016	0.003725	ng/ml	47275	103.06							20220127_SR2DTOX_Ab
AB01974163	01	Ainno_16251	Ainnocence	AIN1-3_AINNL0003	Lot# MB15NO4103	TC00820833	A017	0.001179	ng/ml	46295	100.92							20220127_SR2DTOX_Ab
AB01974163	01	Ainno_16251	Ainnocence	AIN1-3_AINNL0003	Lot# MB15NO4103	TC00820833	A018	0.000373	ng/ml	48390	105.49							20220127_SR2DTOX_Ab
AB01974163	01	Ainno_16251	Ainnocence	AIN1-3_AINNL0003	Lot# MB15NO4103	TC00820833	A019	0.0001181	ng/ml	47005	102.47							20220127_SR2DTOX_Ab
AB01974163	01	Ainno_16251	Ainnocence	AIN1-3_AINNL0003	Lot# MB15NO4103	TC00820833	A020	3.736e-05	ng/ml	45140	98.4							20220127_SR2DTOX_Ab
AB01974163	01	Ainno_16251	Ainnocence	AIN1-3_AINNL0003	Lot# MB15NO4103	TC00820833	A021	1.182e-05	ng/ml	43125	94							20220127_SR2DTOX_Ab
AB01974163	01	Ainno_16251	Ainnocence	AIN1-3_AINNL0003	Lot# MB15NO4103	TC00820833	A022	3.741e-06	ng/ml	45520	99.23							20220127_SR2DTOX_Ab
AB01974164	01	Ainno_16251	Ainnocence	AIN1-5_AINNL0005	Lot# MB15NO4105	TC00820833	B003	11780	ng/ml	46715	101.83	>11780	Inactive	4.81			20	20220127_SR2DTOX_Ab
AB01974164	01	Ainno_16251	Ainnocence	AIN1-5_AINNL0005	Lot# MB15NO4105	TC00820833	B004	3728	ng/ml	46700	101.8							20220127_SR2DTOX_Ab
AB01974164	01	Ainno_16251	Ainnocence	AIN1-5_AINNL0005	Lot# MB15NO4105	TC00820833	B005	1180	ng/ml	48645	106.05							20220127_SR2DTOX_Ab
AB01974164	01	Ainno_16251	Ainnocence	AIN1-5_AINNL0005	Lot# MB15NO4105	TC00820833	B006	373.3	ng/ml	48965	106.74							20220127_SR2DTOX_Ab
AB01974164	01	Ainno_16251	Ainnocence	AIN1-5_AINNL0005	Lot# MB15NO4105	TC00820833	B007	118.1	ng/ml	50485	110.06							20220127_SR2DTOX_Ab
AB01974164	01	Ainno_16251	Ainnocence	AIN1-5_AINNL0005	Lot# MB15NO4105	TC00820833	B008	37.39	ng/ml	48510	105.75							20220127_SR2DTOX_Ab
AB01974164	01	Ainno_16251	Ainnocence	AIN1-5_AINNL0005	Lot# MB15NO4105	TC00820833	B009	11.83	ng/ml	51090	111.38							20220127_SR2DTOX_Ab
AB01974164	01	Ainno_16251	Ainnocence	AIN1-5_AINNL0005	Lot# MB15NO4105	TC00820833	B010	3.744	ng/ml	53295	116.19							20220127_SR2DTOX_Ab
AB01974164	01	Ainno_16251	Ainnocence	AIN1-5_AINNL0005	Lot# MB15NO4105	TC00820833	B011	1.185	ng/ml	53830	117.36							20220127_SR2DTOX_Ab
AB01974164	01	Ainno_16251	Ainnocence	AIN1-5_AINNL0005	Lot# MB15NO4105	TC00820833	B012	0.3749	ng/ml	52490	114.44							20220127_SR2DTOX_Ab
AB01974164	01	Ainno_16251	Ainnocence	AIN1-5_AINNL0005	Lot# MB15NO4105	TC00820833	B013	0.1187	ng/ml	49360	107.61							20220127_SR2DTOX_Ab
AB01974164	01	Ainno_16251	Ainnocence	AIN1-5_AINNL0005	Lot# MB15NO4105	TC00820833	B014	0.03755	ng/ml	48915	106.63							20220127_SR2DTOX_Ab
AB01974164	01	Ainno_16251	Ainnocence	AIN1-5_AINNL0005	Lot# MB15NO4105	TC00820833	B015	0.01188	ng/ml	52375	114.19							20220127_SR2DTOX_Ab
AB01974164	01	Ainno_16251	Ainnocence	AIN1-5_AINNL0005	Lot# MB15NO4105	TC00820833	B016	0.00376	ng/ml	53320	116.25							20220127_SR2DTOX_Ab
AB01974164	01	Ainno_16251	Ainnocence	AIN1-5_AINNL0005	Lot# MB15NO4105	TC00820833	B017	0.00119	ng/ml	49065	106.96							20220127_SR2DTOX_Ab
AB01974164	01	Ainno_16251	Ainnocence	AIN1-5_AINNL0005	Lot# MB15NO4105	TC00820833	B018	0.0003766	ng/ml	48195	105.06							20220127_SR2DTOX_Ab
AB01974164	01	Ainno_16251	Ainnocence	AIN1-5_AINNL0005	Lot# MB15NO4105	TC00820833	B019	0.0001192	ng/ml	45895	100.04							20220127_SR2DTOX_Ab
AB01974164	01	Ainno_16251	Ainnocence	AIN1-5_AINNL0005	Lot# MB15NO4105	TC00820833	B020	3.771e-05	ng/ml	48245	105.17							20220127_SR2DTOX_Ab
AB01974164	01	Ainno_16251	Ainnocence	AIN1-5_AINNL0005	Lot# MB15NO4105	TC00820833	B021	1.193e-05	ng/ml	54865	119.62							20220127_SR2DTOX_Ab
AB01974164	01	Ainno_16251	Ainnocence	AIN1-5_AINNL0005	Lot# MB15NO4105	TC00820833	B022	3.777e-06	ng/ml	48910	106.62							20220127_SR2DTOX_Ab
AB01974165	01	Ainno_16251	Ainnocence	AIN1-6_AINNL0006	Lot# MB15NO4106	TC00820833	C003	11780	ng/ml	49500	107.91	>11780	Inactive	31.59			20	20220127_SR2DTOX_Ab
AB01974165	01	Ainno_16251	Ainnocence	AIN1-6_AINNL0006	Lot# MB15NO4106	TC00820833	C004	3728	ng/ml	47875	104.37							20220127_SR2DTOX_Ab
AB01974165	01	Ainno_16251	Ainnocence	AIN1-6_AINNL0006	Lot# MB15NO4106	TC00820833	C005	1180	ng/ml	48815	106.42							20220127_SR2DTOX_Ab
AB01974165	01	Ainno_16251	Ainnocence	AIN1-6_AINNL0006	Lot# MB15NO4106	TC00820833	C006	373.3	ng/ml	47455	103.45							20220127_SR2DTOX_Ab
AB01974165	01	Ainno_16251	Ainnocence	AIN1-6_AINNL0006	Lot# MB15NO4106	TC00820833	C007	118.1	ng/ml	48410	105.53							20220127_SR2DTOX_Ab
AB01974165	01	Ainno_16251	Ainnocence	AIN1-6_AINNL0006	Lot# MB15NO4106	TC00820833	C008	37.39	ng/ml	46910	102.26							20220127_SR2DTOX_Ab
AB01974165	01	Ainno_16251	Ainnocence	AIN1-6_AINNL0006	Lot# MB15NO4106	TC00820833	C009	11.83	ng/ml	48550	105.84							20220127_SR2DTOX_Ab
AB01974165	01	Ainno_16251	Ainnocence	AIN1-6_AINNL0006	Lot# MB15NO4106	TC00820833	C010	3.744	ng/ml	46720	101.84							20220127_SR2DTOX_Ab
AB01974165	01	Ainno_16251	Ainnocence	AIN1-6_AINNL0006	Lot# MB15NO4106	TC00820833	C011	1.185	ng/ml	49785	108.53							20220127_SR2DTOX_Ab
AB01974165	01	Ainno_16251	Ainnocence	AIN1-6_AINNL0006	Lot# MB15NO4106	TC00820833	C012	0.3749	ng/ml	48395	105.5							20220127_SR2DTOX_Ab
AB01974165	01	Ainno_16251	Ainnocence	AIN1-6_AINNL0006	Lot# MB15NO4106	TC00820833	C013	0.1187	ng/ml	49145	107.14							20220127_SR2DTOX_Ab
AB01974165	01	Ainno_16251	Ainnocence	AIN1-6_AINNL0006	Lot# MB15NO4106	TC00820833	C014	0.03755	ng/ml	49755	108.47							20220127_SR2DTOX_Ab
AB01974165	01	Ainno_16251	Ainnocence	AIN1-6_AINNL0006	Lot# MB15NO4106	TC00820833	C015	0.01188	ng/ml	48070	104.79							20220127_SR2DTOX_Ab
AB01974165	01	Ainno_16251	Ainnocence	AIN1-6_AINNL0006	Lot# MB15NO4106	TC00820833	C016	0.00376	ng/ml	45715	99.65							20220127_SR2DTOX_Ab
AB01974165	01	Ainno_16251	Ainnocence	AIN1-6_AINNL0006	Lot# MB15NO4106	TC00820833	C017	0.00119	ng/ml	50035	109.08							20220127_SR2DTOX_Ab
AB01974165	01	Ainno_16251	Ainnocence	AIN1-6_AINNL0006	Lot# MB15NO4106	TC00820833	C018	0.0003766	ng/ml	48870	106.54							20220127_SR2DTOX_Ab
AB01974165	01	Ainno_16251	Ainnocence	AIN1-6_AINNL0006	Lot# MB15NO4106	TC00820833	C019	0.0001192	ng/ml	48025	104.69							20220127_SR2DTOX_Ab
AB01974165	01	Ainno_16251	Ainnocence	AIN1-6_AINNL0006	Lot# MB15NO4106	TC00820833	C020	3.771e-05	ng/ml	47260	103.02							20220127_SR2DTOX_Ab
AB01974165	01	Ainno_16251	Ainnocence	AIN1-6_AINNL0006	Lot# MB15NO4106	TC00820833	C021	1.193e-05	ng/ml	47770	104.14							20220127_SR2DTOX_Ab
AB01974165	01	Ainno_16251	Ainnocence	AIN1-6_AINNL0006	Lot# MB15NO4106	TC00820833	C022	3.777e-06	ng/ml	46505	101.38							20220127_SR2DTOX_Ab
AB01974166	01	Ainno_16251	Ainnocence	AIN1-7_AINNL0007	Lot# MB15NO4107	TC00820833	D003	11780	ng/ml	48765	106.31	>11780	Inactive	0.3			20	20220127_SR2DTOX_Ab
AB01974166	01	Ainno_16251	Ainnocence	AIN1-7_AINNL0007	Lot# MB15NO4107	TC00820833	D004	3728	ng/ml	46450	101.25							20220127_SR2DTOX_Ab
AB01974166	01	Ainno_16251	Ainnocence	AIN1-7_AINNL0007	Lot# MB15NO4107	TC00820833	D005	1180	ng/ml	50615	110.35							20220127_SR2DTOX_Ab
AB01974166	01	Ainno_16251	Ainnocence	AIN1-7_AINNL0007	Lot# MB15NO4107	TC00820833	D006	373.3	ng/ml	48385	105.48							20220127_SR2DTOX_Ab
AB01974166	01	Ainno_16251	Ainnocence	AIN1-7_AINNL0007	Lot# MB15NO4107	TC00820833	D007	118.1	ng/ml	52180	113.76							20220127_SR2DTOX_Ab
AB01974166	01	Ainno_16251	Ainnocence	AIN1-7_AINNL0007	Lot# MB15NO4107	TC00820833	D008	37.39	ng/ml	47725	104.04							20220127_SR2DTOX_Ab
AB01974166	01	Ainno_16251	Ainnocence	AIN1-7_AINNL0007	Lot# MB15NO4107	TC00820833	D009	11.83	ng/ml	45405	98.97							20220127_SR2DTOX_Ab
AB01974166	01	Ainno_16251	Ainnocence	AIN1-7_AINNL0007	Lot# MB15NO4107	TC00820833	D010	3.744	ng/ml	45525	99.24							20220127_SR2DTOX_Ab
AB01974166	01	Ainno_16251	Ainnocence	AIN1-7_AINNL0007	Lot# MB15NO4107	TC00820833	D011	1.185	ng/ml	48220	105.12							20220127_SR2DTOX_Ab
AB01974166	01	Ainno_16251	Ainnocence	AIN1-7_AINNL0007	Lot# MB15NO4107	TC00820833	D012	0.3749	ng/ml	49210	107.28							20220127_SR2DTOX_Ab
AB01974166	01	Ainno_16251	Ainnocence	AIN1-7_AINNL0007	Lot# MB15NO4107	TC00820833	D013	0.1187	ng/ml	48815	106.42							20220127_SR2DTOX_Ab
AB01974166	01	Ainno_16251	Ainnocence	AIN1-7_AINNL0007	Lot# MB15NO4107	TC00820833	D014	0.03755	ng/ml	46490	101.34							20220127_SR2DTOX_Ab
AB01974166	01	Ainno_16251	Ainnocence	AIN1-7_AINNL0007	Lot# MB15NO4107	TC00820833	D015	0.01188	ng/ml	48350	105.4							20220127_SR2DTOX_Ab
AB01974166	01	Ainno_16251	Ainnocence	AIN1-7_AINNL0007	Lot# MB15NO4107	TC00820833	D016	0.00376	ng/ml	46790	102							20220127_SR2DTOX_Ab
AB01974166	01	Ainno_16251	Ainnocence	AIN1-7_AINNL0007	Lot# MB15NO4107	TC00820833	D017	0.00119	ng/ml	47990	104.62							20220127_SR2DTOX_Ab
AB01974166	01	Ainno_16251	Ainnocence	AIN1-7_AINNL0007	Lot# MB15NO4107	TC00820833	D018	0.0003766	ng/ml	47250	103							20220127_SR2DTOX_Ab
AB01974166	01	Ainno_16251	Ainnocence	AIN1-7_AINNL0007	Lot# MB15NO4107	TC00820833	D019	0.0001192	ng/ml	48345	105.39							20220127_SR2DTOX_Ab
AB01974166	01	Ainno_16251	Ainnocence	AIN1-7_AINNL0007	Lot# MB15NO4107	TC00820833	D020	3.771e-05	ng/ml	47045	102.55							20220127_SR2DTOX_Ab
AB01974166	01	Ainno_16251	Ainnocence	AIN1-7_AINNL0007	Lot# MB15NO4107	TC00820833	D021	1.193e-05	ng/ml	45320	98.79							20220127_SR2DTOX_Ab
AB01974166	01	Ainno_16251	Ainnocence	AIN1-7_AINNL0007	Lot# MB15NO4107	TC00820833	D022	3.777e-06	ng/ml	46840	102.11							20220127_SR2DTOX_Ab
AB01974167	01	Ainno_16251	Ainnocence	AIN1-8_AINNL0008	Lot# MB15NO4108	TC00820833	E003	11780	ng/ml	45685	99.59	>11780	Inactive	0.13			20	20220127_SR2DTOX_Ab
AB01974167	01	Ainno_16251	Ainnocence	AIN1-8_AINNL0008	Lot# MB15NO4108	TC00820833	E004	3728	ng/ml	45870	99.99							20220127_SR2DTOX_Ab
AB01974167	01	Ainno_16251	Ainnocence	AIN1-8_AINNL0008	Lot# MB15NO4108	TC00820833	E005	1180	ng/ml	47365	103.25							20220127_SR2DTOX_Ab
AB01974167	01	Ainno_16251	Ainnocence	AIN1-8_AINNL0008	Lot# MB15NO4108	TC00820833	E006	373.3	ng/ml	45630	99.47							20220127_SR2DTOX_Ab
AB01974167	01	Ainno_16251	Ainnocence	AIN1-8_AINNL0008	Lot# MB15NO4108	TC00820833	E007	118.1	ng/ml	45485	99.15							20220127_SR2DTOX_Ab
AB01974167	01	Ainno_16251	Ainnocence	AIN1-8_AINNL0008	Lot# MB15NO4108	TC00820833	E008	37.39	ng/ml	46595	101.57							20220127_SR2DTOX_Ab
AB01974167	01	Ainno_16251	Ainnocence	AIN1-8_AINNL0008	Lot# MB15NO4108	TC00820833	E009	11.83	ng/ml	48845	106.48							20220127_SR2DTOX_Ab
AB01974167	01	Ainno_16251	Ainnocence	AIN1-8_AINNL0008	Lot# MB15NO4108	TC00820833	E010	3.744	ng/ml	47325	103.16							20220127_SR2DTOX_Ab
AB01974167	01	Ainno_16251	Ainnocence	AIN1-8_AINNL0008	Lot# MB15NO4108	TC00820833	E011	1.185	ng/ml	44815	97.69							20220127_SR2DTOX_Ab
AB01974167	01	Ainno_16251	Ainnocence	AIN1-8_AINNL0008	Lot# MB15NO4108	TC00820833	E012	0.3749	ng/ml	46085	100.46							20220127_SR2DTOX_Ab
AB01974167	01	Ainno_16251	Ainnocence	AIN1-8_AINNL0008	Lot# MB15NO4108	TC00820833	E013	0.1187	ng/ml	46090	100.47							20220127_SR2DTOX_Ab
AB01974167	01	Ainno_16251	Ainnocence	AIN1-8_AINNL0008	Lot# MB15NO4108	TC00820833	E014	0.03755	ng/ml	44135	96.2							20220127_SR2DTOX_Ab
AB01974167	01	Ainno_16251	Ainnocence	AIN1-8_AINNL0008	Lot# MB15NO4108	TC00820833	E015	0.01188	ng/ml	47585	103.73							20220127_SR2DTOX_Ab
AB01974167	01	Ainno_16251	Ainnocence	AIN1-8_AINNL0008	Lot# MB15NO4108	TC00820833	E016	0.00376	ng/ml	46700	101.8							20220127_SR2DTOX_Ab
AB01974167	01	Ainno_16251	Ainnocence	AIN1-8_AINNL0008	Lot# MB15NO4108	TC00820833	E017	0.00119	ng/ml	46260	100.84							20220127_SR2DTOX_Ab
AB01974167	01	Ainno_16251	Ainnocence	AIN1-8_AINNL0008	Lot# MB15NO4108	TC00820833	E018	0.0003766	ng/ml	44160	96.26							20220127_SR2DTOX_Ab
AB01974167	01	Ainno_16251	Ainnocence	AIN1-8_AINNL0008	Lot# MB15NO4108	TC00820833	E019	0.0001192	ng/ml	45000	98.09							20220127_SR2DTOX_Ab
AB01974167	01	Ainno_16251	Ainnocence	AIN1-8_AINNL0008	Lot# MB15NO4108	TC00820833	E020	3.771e-05	ng/ml	45270	98.68							20220127_SR2DTOX_Ab
AB01974167	01	Ainno_16251	Ainnocence	AIN1-8_AINNL0008	Lot# MB15NO4108	TC00820833	E021	1.193e-05	ng/ml	47295	103.1							20220127_SR2DTOX_Ab
AB01974167	01	Ainno_16251	Ainnocence	AIN1-8_AINNL0008	Lot# MB15NO4108	TC00820833	E022	3.777e-06	ng/ml	45095	98.3							20220127_SR2DTOX_Ab
AB01974168	01	Ainno_16251	Ainnocence	AIN1-9_AINNL0009	Lot# MB15NO4109	TC00820833	F003	12330	ng/ml	45865	99.98	>12330	Inactive	0.57			20	20220127_SR2DTOX_Ab
AB01974168	01	Ainno_16251	Ainnocence	AIN1-9_AINNL0009	Lot# MB15NO4109	TC00820833	F004	3902	ng/ml	45620	99.44							20220127_SR2DTOX_Ab
AB01974168	01	Ainno_16251	Ainnocence	AIN1-9_AINNL0009	Lot# MB15NO4109	TC00820833	F005	1235	ng/ml	44525	97.05							20220127_SR2DTOX_Ab
AB01974168	01	Ainno_16251	Ainnocence	AIN1-9_AINNL0009	Lot# MB15NO4109	TC00820833	F006	390.8	ng/ml	45135	98.38							20220127_SR2DTOX_Ab
AB01974168	01	Ainno_16251	Ainnocence	AIN1-9_AINNL0009	Lot# MB15NO4109	TC00820833	F007	123.7	ng/ml	46655	101.7							20220127_SR2DTOX_Ab
AB01974168	01	Ainno_16251	Ainnocence	AIN1-9_AINNL0009	Lot# MB15NO4109	TC00820833	F008	39.13	ng/ml	46290	100.91							20220127_SR2DTOX_Ab
AB01974168	01	Ainno_16251	Ainnocence	AIN1-9_AINNL0009	Lot# MB15NO4109	TC00820833	F009	12.38	ng/ml	47035	102.53							20220127_SR2DTOX_Ab
AB01974168	01	Ainno_16251	Ainnocence	AIN1-9_AINNL0009	Lot# MB15NO4109	TC00820833	F010	3.919	ng/ml	47100	102.67							20220127_SR2DTOX_Ab
AB01974168	01	Ainno_16251	Ainnocence	AIN1-9_AINNL0009	Lot# MB15NO4109	TC00820833	F011	1.24	ng/ml	47225	102.95							20220127_SR2DTOX_Ab
AB01974168	01	Ainno_16251	Ainnocence	AIN1-9_AINNL0009	Lot# MB15NO4109	TC00820833	F012	0.3924	ng/ml	47770	104.14							20220127_SR2DTOX_Ab
AB01974168	01	Ainno_16251	Ainnocence	AIN1-9_AINNL0009	Lot# MB15NO4109	TC00820833	F013	0.1242	ng/ml	48360	105.42							20220127_SR2DTOX_Ab
AB01974168	01	Ainno_16251	Ainnocence	AIN1-9_AINNL0009	Lot# MB15NO4109	TC00820833	F014	0.0393	ng/ml	45805	99.85							20220127_SR2DTOX_Ab
AB01974168	01	Ainno_16251	Ainnocence	AIN1-9_AINNL0009	Lot# MB15NO4109	TC00820833	F015	0.01244	ng/ml	46225	100.76							20220127_SR2DTOX_Ab
AB01974168	01	Ainno_16251	Ainnocence	AIN1-9_AINNL0009	Lot# MB15NO4109	TC00820833	F016	0.003936	ng/ml	45965	100.2							20220127_SR2DTOX_Ab
AB01974168	01	Ainno_16251	Ainnocence	AIN1-9_AINNL0009	Lot# MB15NO4109	TC00820833	F017	0.001246	ng/ml	45785	99.8							20220127_SR2DTOX_Ab
AB01974168	01	Ainno_16251	Ainnocence	AIN1-9_AINNL0009	Lot# MB15NO4109	TC00820833	F018	0.0003941	ng/ml	46060	100.4							20220127_SR2DTOX_Ab
AB01974168	01	Ainno_16251	Ainnocence	AIN1-9_AINNL0009	Lot# MB15NO4109	TC00820833	F019	0.0001247	ng/ml	47830	104.27							20220127_SR2DTOX_Ab
AB01974168	01	Ainno_16251	Ainnocence	AIN1-9_AINNL0009	Lot# MB15NO4109	TC00820833	F020	3.947e-05	ng/ml	47180	102.85							20220127_SR2DTOX_Ab
AB01974168	01	Ainno_16251	Ainnocence	AIN1-9_AINNL0009	Lot# MB15NO4109	TC00820833	F021	1.249e-05	ng/ml	46375	101.09							20220127_SR2DTOX_Ab
AB01974168	01	Ainno_16251	Ainnocence	AIN1-9_AINNL0009	Lot# MB15NO4109	TC00820833	F022	3.953e-06	ng/ml	45950	100.16							20220127_SR2DTOX_Ab
AB01974169	01	Ainno_16251	Ainnocence	AIN1-10_AINNL0010	Lot# MB15NO4110	TC00820833	G003	11670	ng/ml	44550	97.11	>11670	Inactive	0.78			20	20220127_SR2DTOX_Ab
AB01974169	01	Ainno_16251	Ainnocence	AIN1-10_AINNL0010	Lot# MB15NO4110	TC00820833	G004	3693	ng/ml	47820	104.25							20220127_SR2DTOX_Ab
AB01974169	01	Ainno_16251	Ainnocence	AIN1-10_AINNL0010	Lot# MB15NO4110	TC00820833	G005	1169	ng/ml	46885	102.2							20220127_SR2DTOX_Ab
AB01974169	01	Ainno_16251	Ainnocence	AIN1-10_AINNL0010	Lot# MB15NO4110	TC00820833	G006	369.8	ng/ml	43730	95.32							20220127_SR2DTOX_Ab
AB01974169	01	Ainno_16251	Ainnocence	AIN1-10_AINNL0010	Lot# MB15NO4110	TC00820833	G007	117	ng/ml	44540	97.09							20220127_SR2DTOX_Ab
AB01974169	01	Ainno_16251	Ainnocence	AIN1-10_AINNL0010	Lot# MB15NO4110	TC00820833	G008	37.04	ng/ml	46760	101.93							20220127_SR2DTOX_Ab
AB01974169	01	Ainno_16251	Ainnocence	AIN1-10_AINNL0010	Lot# MB15NO4110	TC00820833	G009	11.72	ng/ml	47160	102.8							20220127_SR2DTOX_Ab
AB01974169	01	Ainno_16251	Ainnocence	AIN1-10_AINNL0010	Lot# MB15NO4110	TC00820833	G010	3.709	ng/ml	46905	102.25							20220127_SR2DTOX_Ab
AB01974169	01	Ainno_16251	Ainnocence	AIN1-10_AINNL0010	Lot# MB15NO4110	TC00820833	G011	1.174	ng/ml	44585	97.18							20220127_SR2DTOX_Ab
AB01974169	01	Ainno_16251	Ainnocence	AIN1-10_AINNL0010	Lot# MB15NO4110	TC00820833	G012	0.3714	ng/ml	46485	101.33							20220127_SR2DTOX_Ab
AB01974169	01	Ainno_16251	Ainnocence	AIN1-10_AINNL0010	Lot# MB15NO4110	TC00820833	G013	0.1175	ng/ml	44415	96.81							20220127_SR2DTOX_Ab
AB01974169	01	Ainno_16251	Ainnocence	AIN1-10_AINNL0010	Lot# MB15NO4110	TC00820833	G014	0.0372	ng/ml	46480	101.32							20220127_SR2DTOX_Ab
AB01974169	01	Ainno_16251	Ainnocence	AIN1-10_AINNL0010	Lot# MB15NO4110	TC00820833	G015	0.01177	ng/ml	44645	97.32							20220127_SR2DTOX_Ab
AB01974169	01	Ainno_16251	Ainnocence	AIN1-10_AINNL0010	Lot# MB15NO4110	TC00820833	G016	0.003725	ng/ml	43570	94.97							20220127_SR2DTOX_Ab
AB01974169	01	Ainno_16251	Ainnocence	AIN1-10_AINNL0010	Lot# MB15NO4110	TC00820833	G017	0.001179	ng/ml	44685	97.4							20220127_SR2DTOX_Ab
AB01974169	01	Ainno_16251	Ainnocence	AIN1-10_AINNL0010	Lot# MB15NO4110	TC00820833	G018	0.000373	ng/ml	48070	104.79							20220127_SR2DTOX_Ab
AB01974169	01	Ainno_16251	Ainnocence	AIN1-10_AINNL0010	Lot# MB15NO4110	TC00820833	G019	0.0001181	ng/ml	46940	102.32							20220127_SR2DTOX_Ab
AB01974169	01	Ainno_16251	Ainnocence	AIN1-10_AINNL0010	Lot# MB15NO4110	TC00820833	G020	3.736e-05	ng/ml	45160	98.44							20220127_SR2DTOX_Ab
AB01974169	01	Ainno_16251	Ainnocence	AIN1-10_AINNL0010	Lot# MB15NO4110	TC00820833	G021	1.182e-05	ng/ml	44280	96.52							20220127_SR2DTOX_Ab
AB01974169	01	Ainno_16251	Ainnocence	AIN1-10_AINNL0010	Lot# MB15NO4110	TC00820833	G022	3.741e-06	ng/ml	43770	95.41							20220127_SR2DTOX_Ab
AB01974170	01	Ainno_16251	Ainnocence	AIN1-18_AINNL0018	Lot# MB15NO4118	TC00820833	H003	11220	ng/ml	45550	99.29	>11220	Inactive	0.22			20	20220127_SR2DTOX_Ab
AB01974170	01	Ainno_16251	Ainnocence	AIN1-18_AINNL0018	Lot# MB15NO4118	TC00820833	H004	3551	ng/ml	45435	99.04							20220127_SR2DTOX_Ab
AB01974170	01	Ainno_16251	Ainnocence	AIN1-18_AINNL0018	Lot# MB15NO4118	TC00820833	H005	1124	ng/ml	45120	98.35							20220127_SR2DTOX_Ab
AB01974170	01	Ainno_16251	Ainnocence	AIN1-18_AINNL0018	Lot# MB15NO4118	TC00820833	H006	355.6	ng/ml	47445	103.43							20220127_SR2DTOX_Ab
AB01974170	01	Ainno_16251	Ainnocence	AIN1-18_AINNL0018	Lot# MB15NO4118	TC00820833	H007	112.5	ng/ml	46610	101.6							20220127_SR2DTOX_Ab
AB01974170	01	Ainno_16251	Ainnocence	AIN1-18_AINNL0018	Lot# MB15NO4118	TC00820833	H008	35.61	ng/ml	43885	95.66							20220127_SR2DTOX_Ab
AB01974170	01	Ainno_16251	Ainnocence	AIN1-18_AINNL0018	Lot# MB15NO4118	TC00820833	H009	11.27	ng/ml	46430	101.21							20220127_SR2DTOX_Ab
AB01974170	01	Ainno_16251	Ainnocence	AIN1-18_AINNL0018	Lot# MB15NO4118	TC00820833	H010	3.566	ng/ml	45525	99.24							20220127_SR2DTOX_Ab
AB01974170	01	Ainno_16251	Ainnocence	AIN1-18_AINNL0018	Lot# MB15NO4118	TC00820833	H011	1.128	ng/ml	47865	104.34							20220127_SR2DTOX_Ab
AB01974170	01	Ainno_16251	Ainnocence	AIN1-18_AINNL0018	Lot# MB15NO4118	TC00820833	H012	0.3571	ng/ml	49240	107.34							20220127_SR2DTOX_Ab
AB01974170	01	Ainno_16251	Ainnocence	AIN1-18_AINNL0018	Lot# MB15NO4118	TC00820833	H013	0.113	ng/ml	46250	100.82							20220127_SR2DTOX_Ab
AB01974170	01	Ainno_16251	Ainnocence	AIN1-18_AINNL0018	Lot# MB15NO4118	TC00820833	H014	0.03576	ng/ml	45280	98.7							20220127_SR2DTOX_Ab
AB01974170	01	Ainno_16251	Ainnocence	AIN1-18_AINNL0018	Lot# MB15NO4118	TC00820833	H015	0.01132	ng/ml	47600	103.76							20220127_SR2DTOX_Ab
AB01974170	01	Ainno_16251	Ainnocence	AIN1-18_AINNL0018	Lot# MB15NO4118	TC00820833	H016	0.003581	ng/ml	42205	91.99							20220127_SR2DTOX_Ab
AB01974170	01	Ainno_16251	Ainnocence	AIN1-18_AINNL0018	Lot# MB15NO4118	TC00820833	H017	0.001133	ng/ml	45720	99.66							20220127_SR2DTOX_Ab
AB01974170	01	Ainno_16251	Ainnocence	AIN1-18_AINNL0018	Lot# MB15NO4118	TC00820833	H018	0.0003587	ng/ml	46695	101.79							20220127_SR2DTOX_Ab
AB01974170	01	Ainno_16251	Ainnocence	AIN1-18_AINNL0018	Lot# MB15NO4118	TC00820833	H019	0.0001135	ng/ml	43205	94.17							20220127_SR2DTOX_Ab
AB01974170	01	Ainno_16251	Ainnocence	AIN1-18_AINNL0018	Lot# MB15NO4118	TC00820833	H020	3.592e-05	ng/ml	45545	99.28							20220127_SR2DTOX_Ab
AB01974170	01	Ainno_16251	Ainnocence	AIN1-18_AINNL0018	Lot# MB15NO4118	TC00820833	H021	1.137e-05	ng/ml	45480	99.14							20220127_SR2DTOX_Ab
AB01974170	01	Ainno_16251	Ainnocence	AIN1-18_AINNL0018	Lot# MB15NO4118	TC00820833	H022	3.597e-06	ng/ml	45845	99.93							20220127_SR2DTOX_Ab
AB01974171	01	Ainno_16251	Ainnocence	AIN1-21_AINNL0021	Lot# MB15NO4121	TC00820833	I003	11000	ng/ml	45725	99.67	>11000	Inactive	-1			20	20220127_SR2DTOX_Ab
AB01974171	01	Ainno_16251	Ainnocence	AIN1-21_AINNL0021	Lot# MB15NO4121	TC00820833	I004	3481	ng/ml	46365	101.07							20220127_SR2DTOX_Ab
AB01974171	01	Ainno_16251	Ainnocence	AIN1-21_AINNL0021	Lot# MB15NO4121	TC00820833	I005	1102	ng/ml	47770	104.14							20220127_SR2DTOX_Ab
AB01974171	01	Ainno_16251	Ainnocence	AIN1-21_AINNL0021	Lot# MB15NO4121	TC00820833	I006	348.6	ng/ml	46180	100.67							20220127_SR2DTOX_Ab
AB01974171	01	Ainno_16251	Ainnocence	AIN1-21_AINNL0021	Lot# MB15NO4121	TC00820833	I007	110.3	ng/ml	47175	102.84							20220127_SR2DTOX_Ab
AB01974171	01	Ainno_16251	Ainnocence	AIN1-21_AINNL0021	Lot# MB15NO4121	TC00820833	I008	34.91	ng/ml	47825	104.26							20220127_SR2DTOX_Ab
AB01974171	01	Ainno_16251	Ainnocence	AIN1-21_AINNL0021	Lot# MB15NO4121	TC00820833	I009	11.05	ng/ml	45215	98.56							20220127_SR2DTOX_Ab
AB01974171	01	Ainno_16251	Ainnocence	AIN1-21_AINNL0021	Lot# MB15NO4121	TC00820833	I010	3.496	ng/ml	46840	102.11							20220127_SR2DTOX_Ab
AB01974171	01	Ainno_16251	Ainnocence	AIN1-21_AINNL0021	Lot# MB15NO4121	TC00820833	I011	1.106	ng/ml	48075	104.8							20220127_SR2DTOX_Ab
AB01974171	01	Ainno_16251	Ainnocence	AIN1-21_AINNL0021	Lot# MB15NO4121	TC00820833	I012	0.3501	ng/ml	45280	98.7							20220127_SR2DTOX_Ab
AB01974171	01	Ainno_16251	Ainnocence	AIN1-21_AINNL0021	Lot# MB15NO4121	TC00820833	I013	0.1108	ng/ml	46685	101.77							20220127_SR2DTOX_Ab
AB01974171	01	Ainno_16251	Ainnocence	AIN1-21_AINNL0021	Lot# MB15NO4121	TC00820833	I014	0.03506	ng/ml	46360	101.06							20220127_SR2DTOX_Ab
AB01974171	01	Ainno_16251	Ainnocence	AIN1-21_AINNL0021	Lot# MB15NO4121	TC00820833	I015	0.0111	ng/ml	48115	104.89							20220127_SR2DTOX_Ab
AB01974171	01	Ainno_16251	Ainnocence	AIN1-21_AINNL0021	Lot# MB15NO4121	TC00820833	I016	0.003511	ng/ml	53710	117.1							20220127_SR2DTOX_Ab
AB01974171	01	Ainno_16251	Ainnocence	AIN1-21_AINNL0021	Lot# MB15NO4121	TC00820833	I017	0.001111	ng/ml	45620	99.44							20220127_SR2DTOX_Ab
AB01974171	01	Ainno_16251	Ainnocence	AIN1-21_AINNL0021	Lot# MB15NO4121	TC00820833	I018	0.0003516	ng/ml	46510	101.39							20220127_SR2DTOX_Ab
AB01974171	01	Ainno_16251	Ainnocence	AIN1-21_AINNL0021	Lot# MB15NO4121	TC00820833	I019	0.0001113	ng/ml	47310	103.13							20220127_SR2DTOX_Ab
AB01974171	01	Ainno_16251	Ainnocence	AIN1-21_AINNL0021	Lot# MB15NO4121	TC00820833	I020	3.521e-05	ng/ml	45705	99.63							20220127_SR2DTOX_Ab
AB01974171	01	Ainno_16251	Ainnocence	AIN1-21_AINNL0021	Lot# MB15NO4121	TC00820833	I021	1.114e-05	ng/ml	47615	103.8							20220127_SR2DTOX_Ab
AB01974171	01	Ainno_16251	Ainnocence	AIN1-21_AINNL0021	Lot# MB15NO4121	TC00820833	I022	3.526e-06	ng/ml	43740	95.34							20220127_SR2DTOX_Ab
AB01974172	01	Ainno_16251	Ainnocence	AIN1-22_AINNL0022	Lot# MB15NO4122	TC00820833	J003	10220	ng/ml	49030	106.89	>10220	Inactive	1.07			20	20220127_SR2DTOX_Ab
AB01974172	01	Ainno_16251	Ainnocence	AIN1-22_AINNL0022	Lot# MB15NO4122	TC00820833	J004	3234	ng/ml	45855	99.96							20220127_SR2DTOX_Ab
AB01974172	01	Ainno_16251	Ainnocence	AIN1-22_AINNL0022	Lot# MB15NO4122	TC00820833	J005	1023	ng/ml	48000	104.64							20220127_SR2DTOX_Ab
AB01974172	01	Ainno_16251	Ainnocence	AIN1-22_AINNL0022	Lot# MB15NO4122	TC00820833	J006	323.9	ng/ml	46920	102.28							20220127_SR2DTOX_Ab
AB01974172	01	Ainno_16251	Ainnocence	AIN1-22_AINNL0022	Lot# MB15NO4122	TC00820833	J007	102.5	ng/ml	46830	102.08							20220127_SR2DTOX_Ab
AB01974172	01	Ainno_16251	Ainnocence	AIN1-22_AINNL0022	Lot# MB15NO4122	TC00820833	J008	32.44	ng/ml	48635	106.02							20220127_SR2DTOX_Ab
AB01974172	01	Ainno_16251	Ainnocence	AIN1-22_AINNL0022	Lot# MB15NO4122	TC00820833	J009	10.26	ng/ml	45835	99.91							20220127_SR2DTOX_Ab
AB01974172	01	Ainno_16251	Ainnocence	AIN1-22_AINNL0022	Lot# MB15NO4122	TC00820833	J010	3.248	ng/ml	46060	100.4							20220127_SR2DTOX_Ab
AB01974172	01	Ainno_16251	Ainnocence	AIN1-22_AINNL0022	Lot# MB15NO4122	TC00820833	J011	1.028	ng/ml	46605	101.59							20220127_SR2DTOX_Ab
AB01974172	01	Ainno_16251	Ainnocence	AIN1-22_AINNL0022	Lot# MB15NO4122	TC00820833	J012	0.3253	ng/ml	47250	103							20220127_SR2DTOX_Ab
AB01974172	01	Ainno_16251	Ainnocence	AIN1-22_AINNL0022	Lot# MB15NO4122	TC00820833	J013	0.1029	ng/ml	46160	100.62							20220127_SR2DTOX_Ab
AB01974172	01	Ainno_16251	Ainnocence	AIN1-22_AINNL0022	Lot# MB15NO4122	TC00820833	J014	0.03258	ng/ml	44045	96.01							20220127_SR2DTOX_Ab
AB01974172	01	Ainno_16251	Ainnocence	AIN1-22_AINNL0022	Lot# MB15NO4122	TC00820833	J015	0.01031	ng/ml	46130	100.56							20220127_SR2DTOX_Ab
AB01974172	01	Ainno_16251	Ainnocence	AIN1-22_AINNL0022	Lot# MB15NO4122	TC00820833	J016	0.003262	ng/ml	46295	100.92							20220127_SR2DTOX_Ab
AB01974172	01	Ainno_16251	Ainnocence	AIN1-22_AINNL0022	Lot# MB15NO4122	TC00820833	J017	0.001032	ng/ml	45910	100.08							20220127_SR2DTOX_Ab
AB01974172	01	Ainno_16251	Ainnocence	AIN1-22_AINNL0022	Lot# MB15NO4122	TC00820833	J018	0.0003267	ng/ml	47590	103.74							20220127_SR2DTOX_Ab
AB01974172	01	Ainno_16251	Ainnocence	AIN1-22_AINNL0022	Lot# MB15NO4122	TC00820833	J019	0.0001034	ng/ml	45105	98.32							20220127_SR2DTOX_Ab
AB01974172	01	Ainno_16251	Ainnocence	AIN1-22_AINNL0022	Lot# MB15NO4122	TC00820833	J020	3.272e-05	ng/ml	46055	100.39							20220127_SR2DTOX_Ab
AB01974172	01	Ainno_16251	Ainnocence	AIN1-22_AINNL0022	Lot# MB15NO4122	TC00820833	J021	1.035e-05	ng/ml	46735	101.88							20220127_SR2DTOX_Ab
AB01974172	01	Ainno_16251	Ainnocence	AIN1-22_AINNL0022	Lot# MB15NO4122	TC00820833	J022	3.276e-06	ng/ml	47365	103.25							20220127_SR2DTOX_Ab
AB01974173	01	Ainno_16251	Ainnocence	AIN1-26_AINNL0026	Lot# MB15NO4126	TC00820833	K003	10890	ng/ml	44935	97.95	>10890	Inactive	0.15			20	20220127_SR2DTOX_Ab
AB01974173	01	Ainno_16251	Ainnocence	AIN1-26_AINNL0026	Lot# MB15NO4126	TC00820833	K004	3446	ng/ml	45785	99.8							20220127_SR2DTOX_Ab
AB01974173	01	Ainno_16251	Ainnocence	AIN1-26_AINNL0026	Lot# MB15NO4126	TC00820833	K005	1091	ng/ml	45195	98.52							20220127_SR2DTOX_Ab
AB01974173	01	Ainno_16251	Ainnocence	AIN1-26_AINNL0026	Lot# MB15NO4126	TC00820833	K006	345.1	ng/ml	46310	100.95							20220127_SR2DTOX_Ab
AB01974173	01	Ainno_16251	Ainnocence	AIN1-26_AINNL0026	Lot# MB15NO4126	TC00820833	K007	109.2	ng/ml	44410	96.8							20220127_SR2DTOX_Ab
AB01974173	01	Ainno_16251	Ainnocence	AIN1-26_AINNL0026	Lot# MB15NO4126	TC00820833	K008	34.56	ng/ml	44310	96.58							20220127_SR2DTOX_Ab
AB01974173	01	Ainno_16251	Ainnocence	AIN1-26_AINNL0026	Lot# MB15NO4126	TC00820833	K009	10.94	ng/ml	43965	95.83							20220127_SR2DTOX_Ab
AB01974173	01	Ainno_16251	Ainnocence	AIN1-26_AINNL0026	Lot# MB15NO4126	TC00820833	K010	3.461	ng/ml	46005	100.28							20220127_SR2DTOX_Ab
AB01974173	01	Ainno_16251	Ainnocence	AIN1-26_AINNL0026	Lot# MB15NO4126	TC00820833	K011	1.095	ng/ml	45575	99.35							20220127_SR2DTOX_Ab
AB01974173	01	Ainno_16251	Ainnocence	AIN1-26_AINNL0026	Lot# MB15NO4126	TC00820833	K012	0.3466	ng/ml	45285	98.71							20220127_SR2DTOX_Ab
AB01974173	01	Ainno_16251	Ainnocence	AIN1-26_AINNL0026	Lot# MB15NO4126	TC00820833	K013	0.1097	ng/ml	45180	98.48							20220127_SR2DTOX_Ab
AB01974173	01	Ainno_16251	Ainnocence	AIN1-26_AINNL0026	Lot# MB15NO4126	TC00820833	K014	0.03471	ng/ml	45010	98.11							20220127_SR2DTOX_Ab
AB01974173	01	Ainno_16251	Ainnocence	AIN1-26_AINNL0026	Lot# MB15NO4126	TC00820833	K015	0.01098	ng/ml	44770	97.59							20220127_SR2DTOX_Ab
AB01974173	01	Ainno_16251	Ainnocence	AIN1-26_AINNL0026	Lot# MB15NO4126	TC00820833	K016	0.003476	ng/ml	43755	95.37							20220127_SR2DTOX_Ab
AB01974173	01	Ainno_16251	Ainnocence	AIN1-26_AINNL0026	Lot# MB15NO4126	TC00820833	K017	0.0011	ng/ml	43590	95.01							20220127_SR2DTOX_Ab
AB01974173	01	Ainno_16251	Ainnocence	AIN1-26_AINNL0026	Lot# MB15NO4126	TC00820833	K018	0.0003481	ng/ml	45050	98.2							20220127_SR2DTOX_Ab
AB01974173	01	Ainno_16251	Ainnocence	AIN1-26_AINNL0026	Lot# MB15NO4126	TC00820833	K019	0.0001102	ng/ml	44035	95.98							20220127_SR2DTOX_Ab
AB01974173	01	Ainno_16251	Ainnocence	AIN1-26_AINNL0026	Lot# MB15NO4126	TC00820833	K020	3.486e-05	ng/ml	43615	95.07							20220127_SR2DTOX_Ab
AB01974173	01	Ainno_16251	Ainnocence	AIN1-26_AINNL0026	Lot# MB15NO4126	TC00820833	K021	1.103e-05	ng/ml	43225	94.22							20220127_SR2DTOX_Ab
AB01974173	01	Ainno_16251	Ainnocence	AIN1-26_AINNL0026	Lot# MB15NO4126	TC00820833	K022	3.491e-06	ng/ml	43570	94.97							20220127_SR2DTOX_Ab
AB01974174	01	Ainno_16251	Ainnocence	AIN1-28_AINNL0028	Lot# MB15NO4128	TC00820833	L003	9670	ng/ml	46900	102.24	>9670	Inactive	0.45			20	20220127_SR2DTOX_Ab
AB01974174	01	Ainno_16251	Ainnocence	AIN1-28_AINNL0028	Lot# MB15NO4128	TC00820833	L004	3060	ng/ml	46895	102.23							20220127_SR2DTOX_Ab
AB01974174	01	Ainno_16251	Ainnocence	AIN1-28_AINNL0028	Lot# MB15NO4128	TC00820833	L005	968.4	ng/ml	45120	98.35							20220127_SR2DTOX_Ab
AB01974174	01	Ainno_16251	Ainnocence	AIN1-28_AINNL0028	Lot# MB15NO4128	TC00820833	L006	306.5	ng/ml	45830	99.9							20220127_SR2DTOX_Ab
AB01974174	01	Ainno_16251	Ainnocence	AIN1-28_AINNL0028	Lot# MB15NO4128	TC00820833	L007	96.98	ng/ml	45535	99.26							20220127_SR2DTOX_Ab
AB01974174	01	Ainno_16251	Ainnocence	AIN1-28_AINNL0028	Lot# MB15NO4128	TC00820833	L008	30.69	ng/ml	46285	100.89							20220127_SR2DTOX_Ab
AB01974174	01	Ainno_16251	Ainnocence	AIN1-28_AINNL0028	Lot# MB15NO4128	TC00820833	L009	9.712	ng/ml	46325	100.98							20220127_SR2DTOX_Ab
AB01974174	01	Ainno_16251	Ainnocence	AIN1-28_AINNL0028	Lot# MB15NO4128	TC00820833	L010	3.073	ng/ml	46510	101.39							20220127_SR2DTOX_Ab
AB01974174	01	Ainno_16251	Ainnocence	AIN1-28_AINNL0028	Lot# MB15NO4128	TC00820833	L011	0.9726	ng/ml	46230	100.77							20220127_SR2DTOX_Ab
AB01974174	01	Ainno_16251	Ainnocence	AIN1-28_AINNL0028	Lot# MB15NO4128	TC00820833	L012	0.3078	ng/ml	46080	100.45							20220127_SR2DTOX_Ab
AB01974174	01	Ainno_16251	Ainnocence	AIN1-28_AINNL0028	Lot# MB15NO4128	TC00820833	L013	0.0974	ng/ml	44935	97.95							20220127_SR2DTOX_Ab
AB01974174	01	Ainno_16251	Ainnocence	AIN1-28_AINNL0028	Lot# MB15NO4128	TC00820833	L014	0.03082	ng/ml	44160	96.26							20220127_SR2DTOX_Ab
AB01974174	01	Ainno_16251	Ainnocence	AIN1-28_AINNL0028	Lot# MB15NO4128	TC00820833	L015	0.009754	ng/ml	43960	95.82							20220127_SR2DTOX_Ab
AB01974174	01	Ainno_16251	Ainnocence	AIN1-28_AINNL0028	Lot# MB15NO4128	TC00820833	L016	0.003087	ng/ml	47570	103.7							20220127_SR2DTOX_Ab
AB01974174	01	Ainno_16251	Ainnocence	AIN1-28_AINNL0028	Lot# MB15NO4128	TC00820833	L017	0.0009768	ng/ml	46765	101.94							20220127_SR2DTOX_Ab
AB01974174	01	Ainno_16251	Ainnocence	AIN1-28_AINNL0028	Lot# MB15NO4128	TC00820833	L018	0.0003091	ng/ml	46275	100.87							20220127_SR2DTOX_Ab
AB01974174	01	Ainno_16251	Ainnocence	AIN1-28_AINNL0028	Lot# MB15NO4128	TC00820833	L019	9.782e-05	ng/ml	43490	94.79							20220127_SR2DTOX_Ab
AB01974174	01	Ainno_16251	Ainnocence	AIN1-28_AINNL0028	Lot# MB15NO4128	TC00820833	L020	3.096e-05	ng/ml	44700	97.44							20220127_SR2DTOX_Ab
AB01974174	01	Ainno_16251	Ainnocence	AIN1-28_AINNL0028	Lot# MB15NO4128	TC00820833	L021	9.796e-06	ng/ml	43725	95.31							20220127_SR2DTOX_Ab
AB01974174	01	Ainno_16251	Ainnocence	AIN1-28_AINNL0028	Lot# MB15NO4128	TC00820833	L022	3.1e-06	ng/ml	42290	92.18							20220127_SR2DTOX_Ab
AB01974175	01	Ainno_16251	Ainnocence	AIN1-29_AINNL0029	Lot# MB15NO4129	TC00820833	M003	10000	ng/ml	46225	100.76	>10000	Inactive	0.16			20	20220127_SR2DTOX_Ab
AB01974175	01	Ainno_16251	Ainnocence	AIN1-29_AINNL0029	Lot# MB15NO4129	TC00820833	M004	3165	ng/ml	46590	101.56							20220127_SR2DTOX_Ab
AB01974175	01	Ainno_16251	Ainnocence	AIN1-29_AINNL0029	Lot# MB15NO4129	TC00820833	M005	1001	ng/ml	45970	100.21							20220127_SR2DTOX_Ab
AB01974175	01	Ainno_16251	Ainnocence	AIN1-29_AINNL0029	Lot# MB15NO4129	TC00820833	M006	316.9	ng/ml	45090	98.29							20220127_SR2DTOX_Ab
AB01974175	01	Ainno_16251	Ainnocence	AIN1-29_AINNL0029	Lot# MB15NO4129	TC00820833	M007	100.3	ng/ml	42975	93.67							20220127_SR2DTOX_Ab
AB01974175	01	Ainno_16251	Ainnocence	AIN1-29_AINNL0029	Lot# MB15NO4129	TC00820833	M008	31.74	ng/ml	45940	100.14							20220127_SR2DTOX_Ab
AB01974175	01	Ainno_16251	Ainnocence	AIN1-29_AINNL0029	Lot# MB15NO4129	TC00820833	M009	10.04	ng/ml	46530	101.43							20220127_SR2DTOX_Ab
AB01974175	01	Ainno_16251	Ainnocence	AIN1-29_AINNL0029	Lot# MB15NO4129	TC00820833	M010	3.178	ng/ml	45880	100.01							20220127_SR2DTOX_Ab
AB01974175	01	Ainno_16251	Ainnocence	AIN1-29_AINNL0029	Lot# MB15NO4129	TC00820833	M011	1.006	ng/ml	45720	99.66							20220127_SR2DTOX_Ab
AB01974175	01	Ainno_16251	Ainnocence	AIN1-29_AINNL0029	Lot# MB15NO4129	TC00820833	M012	0.3183	ng/ml	45795	99.83							20220127_SR2DTOX_Ab
AB01974175	01	Ainno_16251	Ainnocence	AIN1-29_AINNL0029	Lot# MB15NO4129	TC00820833	M013	0.1007	ng/ml	45775	99.78							20220127_SR2DTOX_Ab
AB01974175	01	Ainno_16251	Ainnocence	AIN1-29_AINNL0029	Lot# MB15NO4129	TC00820833	M014	0.03187	ng/ml	44815	97.69							20220127_SR2DTOX_Ab
AB01974175	01	Ainno_16251	Ainnocence	AIN1-29_AINNL0029	Lot# MB15NO4129	TC00820833	M015	0.01009	ng/ml	46060	100.4							20220127_SR2DTOX_Ab
AB01974175	01	Ainno_16251	Ainnocence	AIN1-29_AINNL0029	Lot# MB15NO4129	TC00820833	M016	0.003192	ng/ml	45345	98.84							20220127_SR2DTOX_Ab
AB01974175	01	Ainno_16251	Ainnocence	AIN1-29_AINNL0029	Lot# MB15NO4129	TC00820833	M017	0.00101	ng/ml	44960	98							20220127_SR2DTOX_Ab
AB01974175	01	Ainno_16251	Ainnocence	AIN1-29_AINNL0029	Lot# MB15NO4129	TC00820833	M018	0.0003197	ng/ml	47535	103.62							20220127_SR2DTOX_Ab
AB01974175	01	Ainno_16251	Ainnocence	AIN1-29_AINNL0029	Lot# MB15NO4129	TC00820833	M019	0.0001012	ng/ml	44370	96.72							20220127_SR2DTOX_Ab
AB01974175	01	Ainno_16251	Ainnocence	AIN1-29_AINNL0029	Lot# MB15NO4129	TC00820833	M020	3.201e-05	ng/ml	43620	95.08							20220127_SR2DTOX_Ab
AB01974175	01	Ainno_16251	Ainnocence	AIN1-29_AINNL0029	Lot# MB15NO4129	TC00820833	M021	1.013e-05	ng/ml	44875	97.82							20220127_SR2DTOX_Ab
AB01974175	01	Ainno_16251	Ainnocence	AIN1-29_AINNL0029	Lot# MB15NO4129	TC00820833	M022	3.206e-06	ng/ml	44795	97.64							20220127_SR2DTOX_Ab
AB01974176	01	Ainno_16251	Ainnocence	AIN1-30_AINNL0030	Lot# MB15NO4130	TC00820833	N003	8670	ng/ml	46135	100.57	>8670	Inactive	0.14			20	20220127_SR2DTOX_Ab
AB01974176	01	Ainno_16251	Ainnocence	AIN1-30_AINNL0030	Lot# MB15NO4130	TC00820833	N004	2744	ng/ml	43305	94.39							20220127_SR2DTOX_Ab
AB01974176	01	Ainno_16251	Ainnocence	AIN1-30_AINNL0030	Lot# MB15NO4130	TC00820833	N005	868.3	ng/ml	46870	102.17							20220127_SR2DTOX_Ab
AB01974176	01	Ainno_16251	Ainnocence	AIN1-30_AINNL0030	Lot# MB15NO4130	TC00820833	N006	274.8	ng/ml	46715	101.83							20220127_SR2DTOX_Ab
AB01974176	01	Ainno_16251	Ainnocence	AIN1-30_AINNL0030	Lot# MB15NO4130	TC00820833	N007	86.95	ng/ml	46480	101.32							20220127_SR2DTOX_Ab
AB01974176	01	Ainno_16251	Ainnocence	AIN1-30_AINNL0030	Lot# MB15NO4130	TC00820833	N008	27.52	ng/ml	44170	96.28							20220127_SR2DTOX_Ab
AB01974176	01	Ainno_16251	Ainnocence	AIN1-30_AINNL0030	Lot# MB15NO4130	TC00820833	N009	8.708	ng/ml	47760	104.11							20220127_SR2DTOX_Ab
AB01974176	01	Ainno_16251	Ainnocence	AIN1-30_AINNL0030	Lot# MB15NO4130	TC00820833	N010	2.756	ng/ml	47125	102.73							20220127_SR2DTOX_Ab
AB01974176	01	Ainno_16251	Ainnocence	AIN1-30_AINNL0030	Lot# MB15NO4130	TC00820833	N011	0.872	ng/ml	44055	96.03							20220127_SR2DTOX_Ab
AB01974176	01	Ainno_16251	Ainnocence	AIN1-30_AINNL0030	Lot# MB15NO4130	TC00820833	N012	0.276	ng/ml	43510	94.84							20220127_SR2DTOX_Ab
AB01974176	01	Ainno_16251	Ainnocence	AIN1-30_AINNL0030	Lot# MB15NO4130	TC00820833	N013	0.08733	ng/ml	43650	95.14							20220127_SR2DTOX_Ab
AB01974176	01	Ainno_16251	Ainnocence	AIN1-30_AINNL0030	Lot# MB15NO4130	TC00820833	N014	0.02764	ng/ml	45785	99.8							20220127_SR2DTOX_Ab
AB01974176	01	Ainno_16251	Ainnocence	AIN1-30_AINNL0030	Lot# MB15NO4130	TC00820833	N015	0.008745	ng/ml	46095	100.48							20220127_SR2DTOX_Ab
AB01974176	01	Ainno_16251	Ainnocence	AIN1-30_AINNL0030	Lot# MB15NO4130	TC00820833	N016	0.002767	ng/ml	45275	98.69							20220127_SR2DTOX_Ab
AB01974176	01	Ainno_16251	Ainnocence	AIN1-30_AINNL0030	Lot# MB15NO4130	TC00820833	N017	0.0008758	ng/ml	44475	96.94							20220127_SR2DTOX_Ab
AB01974176	01	Ainno_16251	Ainnocence	AIN1-30_AINNL0030	Lot# MB15NO4130	TC00820833	N018	0.0002771	ng/ml	43670	95.19							20220127_SR2DTOX_Ab
AB01974176	01	Ainno_16251	Ainnocence	AIN1-30_AINNL0030	Lot# MB15NO4130	TC00820833	N019	8.771e-05	ng/ml	43620	95.08							20220127_SR2DTOX_Ab
AB01974176	01	Ainno_16251	Ainnocence	AIN1-30_AINNL0030	Lot# MB15NO4130	TC00820833	N020	2.775e-05	ng/ml	42345	92.3							20220127_SR2DTOX_Ab
AB01974176	01	Ainno_16251	Ainnocence	AIN1-30_AINNL0030	Lot# MB15NO4130	TC00820833	N021	8.783e-06	ng/ml	43265	94.3							20220127_SR2DTOX_Ab
AB01974176	01	Ainno_16251	Ainnocence	AIN1-30_AINNL0030	Lot# MB15NO4130	TC00820833	N022	2.779e-06	ng/ml	45820	99.88							20220127_SR2DTOX_Ab
AB01974177	01	Ainno_16251	Ainnocence	AIN1-31_AINNL0031	Lot# MB15NO4131	TC00820833	O003	9780	ng/ml	44935	97.95	>9780	Inactive	0.2			20	20220127_SR2DTOX_Ab
AB01974177	01	Ainno_16251	Ainnocence	AIN1-31_AINNL0031	Lot# MB15NO4131	TC00820833	O004	3095	ng/ml	45040	98.18							20220127_SR2DTOX_Ab
AB01974177	01	Ainno_16251	Ainnocence	AIN1-31_AINNL0031	Lot# MB15NO4131	TC00820833	O005	979.4	ng/ml	47755	104.1							20220127_SR2DTOX_Ab
AB01974177	01	Ainno_16251	Ainnocence	AIN1-31_AINNL0031	Lot# MB15NO4131	TC00820833	O006	309.9	ng/ml	46040	100.36							20220127_SR2DTOX_Ab
AB01974177	01	Ainno_16251	Ainnocence	AIN1-31_AINNL0031	Lot# MB15NO4131	TC00820833	O007	98.08	ng/ml	47955	104.54							20220127_SR2DTOX_Ab
AB01974177	01	Ainno_16251	Ainnocence	AIN1-31_AINNL0031	Lot# MB15NO4131	TC00820833	O008	31.04	ng/ml	46600	101.58							20220127_SR2DTOX_Ab
AB01974177	01	Ainno_16251	Ainnocence	AIN1-31_AINNL0031	Lot# MB15NO4131	TC00820833	O009	9.822	ng/ml	45245	98.62							20220127_SR2DTOX_Ab
AB01974177	01	Ainno_16251	Ainnocence	AIN1-31_AINNL0031	Lot# MB15NO4131	TC00820833	O010	3.108	ng/ml	44405	96.79							20220127_SR2DTOX_Ab
AB01974177	01	Ainno_16251	Ainnocence	AIN1-31_AINNL0031	Lot# MB15NO4131	TC00820833	O011	0.9837	ng/ml	46500	101.36							20220127_SR2DTOX_Ab
AB01974177	01	Ainno_16251	Ainnocence	AIN1-31_AINNL0031	Lot# MB15NO4131	TC00820833	O012	0.3113	ng/ml	47070	102.61							20220127_SR2DTOX_Ab
AB01974177	01	Ainno_16251	Ainnocence	AIN1-31_AINNL0031	Lot# MB15NO4131	TC00820833	O013	0.09851	ng/ml	47830	104.27							20220127_SR2DTOX_Ab
AB01974177	01	Ainno_16251	Ainnocence	AIN1-31_AINNL0031	Lot# MB15NO4131	TC00820833	O014	0.03117	ng/ml	45555	99.3							20220127_SR2DTOX_Ab
AB01974177	01	Ainno_16251	Ainnocence	AIN1-31_AINNL0031	Lot# MB15NO4131	TC00820833	O015	0.009865	ng/ml	44070	96.06							20220127_SR2DTOX_Ab
AB01974177	01	Ainno_16251	Ainnocence	AIN1-31_AINNL0031	Lot# MB15NO4131	TC00820833	O016	0.003122	ng/ml	43380	94.55							20220127_SR2DTOX_Ab
AB01974177	01	Ainno_16251	Ainnocence	AIN1-31_AINNL0031	Lot# MB15NO4131	TC00820833	O017	0.0009879	ng/ml	45250	98.64							20220127_SR2DTOX_Ab
AB01974177	01	Ainno_16251	Ainnocence	AIN1-31_AINNL0031	Lot# MB15NO4131	TC00820833	O018	0.0003126	ng/ml	41975	91.49							20220127_SR2DTOX_Ab
AB01974177	01	Ainno_16251	Ainnocence	AIN1-31_AINNL0031	Lot# MB15NO4131	TC00820833	O019	9.893e-05	ng/ml	44045	96.01							20220127_SR2DTOX_Ab
AB01974177	01	Ainno_16251	Ainnocence	AIN1-31_AINNL0031	Lot# MB15NO4131	TC00820833	O020	3.131e-05	ng/ml	45220	98.57							20220127_SR2DTOX_Ab
AB01974177	01	Ainno_16251	Ainnocence	AIN1-31_AINNL0031	Lot# MB15NO4131	TC00820833	O021	9.908e-06	ng/ml	43515	94.85							20220127_SR2DTOX_Ab
AB01974177	01	Ainno_16251	Ainnocence	AIN1-31_AINNL0031	Lot# MB15NO4131	TC00820833	O022	3.135e-06	ng/ml	43030	93.79							20220127_SR2DTOX_Ab
AB01974178	01	Ainno_16251	Ainnocence	AIN1-32_AINNL0032	Lot# MB15NO4132	TC00820833	P003	10220	ng/ml	43910	95.71	>10220	Inactive	0.16			20	20220127_SR2DTOX_Ab
AB01974178	01	Ainno_16251	Ainnocence	AIN1-32_AINNL0032	Lot# MB15NO4132	TC00820833	P004	3234	ng/ml	45505	99.19							20220127_SR2DTOX_Ab
AB01974178	01	Ainno_16251	Ainnocence	AIN1-32_AINNL0032	Lot# MB15NO4132	TC00820833	P005	1023	ng/ml	45195	98.52							20220127_SR2DTOX_Ab
AB01974178	01	Ainno_16251	Ainnocence	AIN1-32_AINNL0032	Lot# MB15NO4132	TC00820833	P006	323.9	ng/ml	44875	97.82							20220127_SR2DTOX_Ab
AB01974178	01	Ainno_16251	Ainnocence	AIN1-32_AINNL0032	Lot# MB15NO4132	TC00820833	P007	102.5	ng/ml	44840	97.74							20220127_SR2DTOX_Ab
AB01974178	01	Ainno_16251	Ainnocence	AIN1-32_AINNL0032	Lot# MB15NO4132	TC00820833	P008	32.44	ng/ml	45740	99.71							20220127_SR2DTOX_Ab
AB01974178	01	Ainno_16251	Ainnocence	AIN1-32_AINNL0032	Lot# MB15NO4132	TC00820833	P009	10.26	ng/ml	45680	99.57							20220127_SR2DTOX_Ab
AB01974178	01	Ainno_16251	Ainnocence	AIN1-32_AINNL0032	Lot# MB15NO4132	TC00820833	P010	3.248	ng/ml	45755	99.74							20220127_SR2DTOX_Ab
AB01974178	01	Ainno_16251	Ainnocence	AIN1-32_AINNL0032	Lot# MB15NO4132	TC00820833	P011	1.028	ng/ml	45050	98.2							20220127_SR2DTOX_Ab
AB01974178	01	Ainno_16251	Ainnocence	AIN1-32_AINNL0032	Lot# MB15NO4132	TC00820833	P012	0.3253	ng/ml	44725	97.49							20220127_SR2DTOX_Ab
AB01974178	01	Ainno_16251	Ainnocence	AIN1-32_AINNL0032	Lot# MB15NO4132	TC00820833	P013	0.1029	ng/ml	44560	97.13							20220127_SR2DTOX_Ab
AB01974178	01	Ainno_16251	Ainnocence	AIN1-32_AINNL0032	Lot# MB15NO4132	TC00820833	P014	0.03258	ng/ml	44405	96.79							20220127_SR2DTOX_Ab
AB01974178	01	Ainno_16251	Ainnocence	AIN1-32_AINNL0032	Lot# MB15NO4132	TC00820833	P015	0.01031	ng/ml	44720	97.48							20220127_SR2DTOX_Ab
AB01974178	01	Ainno_16251	Ainnocence	AIN1-32_AINNL0032	Lot# MB15NO4132	TC00820833	P016	0.003262	ng/ml	45075	98.25							20220127_SR2DTOX_Ab
AB01974178	01	Ainno_16251	Ainnocence	AIN1-32_AINNL0032	Lot# MB15NO4132	TC00820833	P017	0.001032	ng/ml	46215	100.74							20220127_SR2DTOX_Ab
AB01974178	01	Ainno_16251	Ainnocence	AIN1-32_AINNL0032	Lot# MB15NO4132	TC00820833	P018	0.0003267	ng/ml	44700	97.44							20220127_SR2DTOX_Ab
AB01974178	01	Ainno_16251	Ainnocence	AIN1-32_AINNL0032	Lot# MB15NO4132	TC00820833	P019	0.0001034	ng/ml	42605	92.86							20220127_SR2DTOX_Ab
AB01974178	01	Ainno_16251	Ainnocence	AIN1-32_AINNL0032	Lot# MB15NO4132	TC00820833	P020	3.272e-05	ng/ml	43280	94.34							20220127_SR2DTOX_Ab
AB01974178	01	Ainno_16251	Ainnocence	AIN1-32_AINNL0032	Lot# MB15NO4132	TC00820833	P021	1.035e-05	ng/ml	45075	98.25							20220127_SR2DTOX_Ab
AB01974178	01	Ainno_16251	Ainnocence	AIN1-32_AINNL0032	Lot# MB15NO4132	TC00820833	P022	3.276e-06	ng/ml	42965	93.65							20220127_SR2DTOX_Ab
AB01974179	01	Ainno_16251	Ainnocence	AIN1-33_AINNL0033	Lot# MB15NO4133	TC00820836	A003	10670	ng/ml	46905	101.82	>10670	Inactive	6.23			20	20220127_SR2DTOX_Ab
AB01974179	01	Ainno_16251	Ainnocence	AIN1-33_AINNL0033	Lot# MB15NO4133	TC00820836	A004	3377	ng/ml	44790	97.23							20220127_SR2DTOX_Ab
AB01974179	01	Ainno_16251	Ainnocence	AIN1-33_AINNL0033	Lot# MB15NO4133	TC00820836	A005	1069	ng/ml	46695	101.37							20220127_SR2DTOX_Ab
AB01974179	01	Ainno_16251	Ainnocence	AIN1-33_AINNL0033	Lot# MB15NO4133	TC00820836	A006	338.1	ng/ml	45360	98.47							20220127_SR2DTOX_Ab
AB01974179	01	Ainno_16251	Ainnocence	AIN1-33_AINNL0033	Lot# MB15NO4133	TC00820836	A007	107	ng/ml	49645	107.78							20220127_SR2DTOX_Ab
AB01974179	01	Ainno_16251	Ainnocence	AIN1-33_AINNL0033	Lot# MB15NO4133	TC00820836	A008	33.86	ng/ml	47825	103.82							20220127_SR2DTOX_Ab
AB01974179	01	Ainno_16251	Ainnocence	AIN1-33_AINNL0033	Lot# MB15NO4133	TC00820836	A009	10.72	ng/ml	47920	104.03							20220127_SR2DTOX_Ab
AB01974179	01	Ainno_16251	Ainnocence	AIN1-33_AINNL0033	Lot# MB15NO4133	TC00820836	A010	3.391	ng/ml	48040	104.29							20220127_SR2DTOX_Ab
AB01974179	01	Ainno_16251	Ainnocence	AIN1-33_AINNL0033	Lot# MB15NO4133	TC00820836	A011	1.073	ng/ml	47175	102.41							20220127_SR2DTOX_Ab
AB01974179	01	Ainno_16251	Ainnocence	AIN1-33_AINNL0033	Lot# MB15NO4133	TC00820836	A012	0.3396	ng/ml	46705	101.39							20220127_SR2DTOX_Ab
AB01974179	01	Ainno_16251	Ainnocence	AIN1-33_AINNL0033	Lot# MB15NO4133	TC00820836	A013	0.1075	ng/ml	47210	102.49							20220127_SR2DTOX_Ab
AB01974179	01	Ainno_16251	Ainnocence	AIN1-33_AINNL0033	Lot# MB15NO4133	TC00820836	A014	0.03401	ng/ml	48655	105.63							20220127_SR2DTOX_Ab
AB01974179	01	Ainno_16251	Ainnocence	AIN1-33_AINNL0033	Lot# MB15NO4133	TC00820836	A015	0.01076	ng/ml	47225	102.52							20220127_SR2DTOX_Ab
AB01974179	01	Ainno_16251	Ainnocence	AIN1-33_AINNL0033	Lot# MB15NO4133	TC00820836	A016	0.003406	ng/ml	45700	99.2							20220127_SR2DTOX_Ab
AB01974179	01	Ainno_16251	Ainnocence	AIN1-33_AINNL0033	Lot# MB15NO4133	TC00820836	A017	0.001078	ng/ml	47040	102.12							20220127_SR2DTOX_Ab
AB01974179	01	Ainno_16251	Ainnocence	AIN1-33_AINNL0033	Lot# MB15NO4133	TC00820836	A018	0.0003411	ng/ml	47160	102.38							20220127_SR2DTOX_Ab
AB01974179	01	Ainno_16251	Ainnocence	AIN1-33_AINNL0033	Lot# MB15NO4133	TC00820836	A019	0.0001079	ng/ml	47405	102.91							20220127_SR2DTOX_Ab
AB01974179	01	Ainno_16251	Ainnocence	AIN1-33_AINNL0033	Lot# MB15NO4133	TC00820836	A020	3.416e-05	ng/ml	43785	95.04							20220127_SR2DTOX_Ab
AB01974179	01	Ainno_16251	Ainnocence	AIN1-33_AINNL0033	Lot# MB15NO4133	TC00820836	A021	1.081e-05	ng/ml	46950	101.92							20220127_SR2DTOX_Ab
AB01974179	01	Ainno_16251	Ainnocence	AIN1-33_AINNL0033	Lot# MB15NO4133	TC00820836	A022	3.421e-06	ng/ml	43395	94.19							20220127_SR2DTOX_Ab
AB01974180	01	Ainno_16251	Ainnocence	AIN1-36_AINNL0036	Lot# MB15NO4136	TC00820836	B003	9440	ng/ml	48345	104.95	>9440	Inactive	4.71			20	20220127_SR2DTOX_Ab
AB01974180	01	Ainno_16251	Ainnocence	AIN1-36_AINNL0036	Lot# MB15NO4136	TC00820836	B004	2987	ng/ml	50695	110.06							20220127_SR2DTOX_Ab
AB01974180	01	Ainno_16251	Ainnocence	AIN1-36_AINNL0036	Lot# MB15NO4136	TC00820836	B005	945.4	ng/ml	49480	107.42							20220127_SR2DTOX_Ab
AB01974180	01	Ainno_16251	Ainnocence	AIN1-36_AINNL0036	Lot# MB15NO4136	TC00820836	B006	299.2	ng/ml	48040	104.29							20220127_SR2DTOX_Ab
AB01974180	01	Ainno_16251	Ainnocence	AIN1-36_AINNL0036	Lot# MB15NO4136	TC00820836	B007	94.67	ng/ml	48750	105.83							20220127_SR2DTOX_Ab
AB01974180	01	Ainno_16251	Ainnocence	AIN1-36_AINNL0036	Lot# MB15NO4136	TC00820836	B008	29.96	ng/ml	51150	111.05							20220127_SR2DTOX_Ab
AB01974180	01	Ainno_16251	Ainnocence	AIN1-36_AINNL0036	Lot# MB15NO4136	TC00820836	B009	9.481	ng/ml	49115	106.63							20220127_SR2DTOX_Ab
AB01974180	01	Ainno_16251	Ainnocence	AIN1-36_AINNL0036	Lot# MB15NO4136	TC00820836	B010	3	ng/ml	47880	103.94							20220127_SR2DTOX_Ab
AB01974180	01	Ainno_16251	Ainnocence	AIN1-36_AINNL0036	Lot# MB15NO4136	TC00820836	B011	0.9495	ng/ml	48340	104.94							20220127_SR2DTOX_Ab
AB01974180	01	Ainno_16251	Ainnocence	AIN1-36_AINNL0036	Lot# MB15NO4136	TC00820836	B012	0.3005	ng/ml	50875	110.45							20220127_SR2DTOX_Ab
AB01974180	01	Ainno_16251	Ainnocence	AIN1-36_AINNL0036	Lot# MB15NO4136	TC00820836	B013	0.09508	ng/ml	50970	110.66							20220127_SR2DTOX_Ab
AB01974180	01	Ainno_16251	Ainnocence	AIN1-36_AINNL0036	Lot# MB15NO4136	TC00820836	B014	0.03009	ng/ml	52255	113.45							20220127_SR2DTOX_Ab
AB01974180	01	Ainno_16251	Ainnocence	AIN1-36_AINNL0036	Lot# MB15NO4136	TC00820836	B015	0.009522	ng/ml	48440	105.16							20220127_SR2DTOX_Ab
AB01974180	01	Ainno_16251	Ainnocence	AIN1-36_AINNL0036	Lot# MB15NO4136	TC00820836	B016	0.003013	ng/ml	47000	102.03							20220127_SR2DTOX_Ab
AB01974180	01	Ainno_16251	Ainnocence	AIN1-36_AINNL0036	Lot# MB15NO4136	TC00820836	B017	0.0009536	ng/ml	46700	101.38							20220127_SR2DTOX_Ab
AB01974180	01	Ainno_16251	Ainnocence	AIN1-36_AINNL0036	Lot# MB15NO4136	TC00820836	B018	0.0003018	ng/ml	48910	106.18							20220127_SR2DTOX_Ab
AB01974180	01	Ainno_16251	Ainnocence	AIN1-36_AINNL0036	Lot# MB15NO4136	TC00820836	B019	9.549e-05	ng/ml	47300	102.68							20220127_SR2DTOX_Ab
AB01974180	01	Ainno_16251	Ainnocence	AIN1-36_AINNL0036	Lot# MB15NO4136	TC00820836	B020	3.022e-05	ng/ml	46980	101.99							20220127_SR2DTOX_Ab
AB01974180	01	Ainno_16251	Ainnocence	AIN1-36_AINNL0036	Lot# MB15NO4136	TC00820836	B021	9.563e-06	ng/ml	46230	100.36							20220127_SR2DTOX_Ab
AB01974180	01	Ainno_16251	Ainnocence	AIN1-36_AINNL0036	Lot# MB15NO4136	TC00820836	B022	3.026e-06	ng/ml	46225	100.35							20220127_SR2DTOX_Ab
AB01974181	01	Ainno_16251	Ainnocence	AIN1-1_AINNL0001	Lot# MB15NO4101	TC00820836	C003	11000	ng/ml	46565	101.08	>11000	Inactive	4.35			20	20220127_SR2DTOX_Ab
AB01974181	01	Ainno_16251	Ainnocence	AIN1-1_AINNL0001	Lot# MB15NO4101	TC00820836	C004	3481	ng/ml	49040	106.46							20220127_SR2DTOX_Ab
AB01974181	01	Ainno_16251	Ainnocence	AIN1-1_AINNL0001	Lot# MB15NO4101	TC00820836	C005	1102	ng/ml	46655	101.28							20220127_SR2DTOX_Ab
AB01974181	01	Ainno_16251	Ainnocence	AIN1-1_AINNL0001	Lot# MB15NO4101	TC00820836	C006	348.6	ng/ml	47550	103.23							20220127_SR2DTOX_Ab
AB01974181	01	Ainno_16251	Ainnocence	AIN1-1_AINNL0001	Lot# MB15NO4101	TC00820836	C007	110.3	ng/ml	48450	105.18							20220127_SR2DTOX_Ab
AB01974181	01	Ainno_16251	Ainnocence	AIN1-1_AINNL0001	Lot# MB15NO4101	TC00820836	C008	34.91	ng/ml	44990	97.66							20220127_SR2DTOX_Ab
AB01974181	01	Ainno_16251	Ainnocence	AIN1-1_AINNL0001	Lot# MB15NO4101	TC00820836	C009	11.05	ng/ml	46305	100.52							20220127_SR2DTOX_Ab
AB01974181	01	Ainno_16251	Ainnocence	AIN1-1_AINNL0001	Lot# MB15NO4101	TC00820836	C010	3.496	ng/ml	46850	101.7							20220127_SR2DTOX_Ab
AB01974181	01	Ainno_16251	Ainnocence	AIN1-1_AINNL0001	Lot# MB15NO4101	TC00820836	C011	1.106	ng/ml	47620	103.38							20220127_SR2DTOX_Ab
AB01974181	01	Ainno_16251	Ainnocence	AIN1-1_AINNL0001	Lot# MB15NO4101	TC00820836	C012	0.3501	ng/ml	47025	102.08							20220127_SR2DTOX_Ab
AB01974181	01	Ainno_16251	Ainnocence	AIN1-1_AINNL0001	Lot# MB15NO4101	TC00820836	C013	0.1108	ng/ml	50500	109.64							20220127_SR2DTOX_Ab
AB01974181	01	Ainno_16251	Ainnocence	AIN1-1_AINNL0001	Lot# MB15NO4101	TC00820836	C014	0.03506	ng/ml	49130	106.66							20220127_SR2DTOX_Ab
AB01974181	01	Ainno_16251	Ainnocence	AIN1-1_AINNL0001	Lot# MB15NO4101	TC00820836	C015	0.0111	ng/ml	47905	104							20220127_SR2DTOX_Ab
AB01974181	01	Ainno_16251	Ainnocence	AIN1-1_AINNL0001	Lot# MB15NO4101	TC00820836	C016	0.003511	ng/ml	48460	105.2							20220127_SR2DTOX_Ab
AB01974181	01	Ainno_16251	Ainnocence	AIN1-1_AINNL0001	Lot# MB15NO4101	TC00820836	C017	0.001111	ng/ml	48320	104.9							20220127_SR2DTOX_Ab
AB01974181	01	Ainno_16251	Ainnocence	AIN1-1_AINNL0001	Lot# MB15NO4101	TC00820836	C018	0.0003516	ng/ml	47740	103.64							20220127_SR2DTOX_Ab
AB01974181	01	Ainno_16251	Ainnocence	AIN1-1_AINNL0001	Lot# MB15NO4101	TC00820836	C019	0.0001113	ng/ml	46670	101.31							20220127_SR2DTOX_Ab
AB01974181	01	Ainno_16251	Ainnocence	AIN1-1_AINNL0001	Lot# MB15NO4101	TC00820836	C020	3.521e-05	ng/ml	46830	101.66							20220127_SR2DTOX_Ab
AB01974181	01	Ainno_16251	Ainnocence	AIN1-1_AINNL0001	Lot# MB15NO4101	TC00820836	C021	1.114e-05	ng/ml	46250	100.4							20220127_SR2DTOX_Ab
AB01974181	01	Ainno_16251	Ainnocence	AIN1-1_AINNL0001	Lot# MB15NO4101	TC00820836	C022	3.526e-06	ng/ml	44355	96.28							20220127_SR2DTOX_Ab
AB01974183	01	Ainno_16251	Ainnocence	AIN1-2_AINNL0002	Lot# MB15NO2511	TC00820836	E003	4780	ng/ml	47650	103.44	>4780	Inactive	0.14			20	20220127_SR2DTOX_Ab
AB01974183	01	Ainno_16251	Ainnocence	AIN1-2_AINNL0002	Lot# MB15NO2511	TC00820836	E004	1513	ng/ml	43470	94.36							20220127_SR2DTOX_Ab
AB01974183	01	Ainno_16251	Ainnocence	AIN1-2_AINNL0002	Lot# MB15NO2511	TC00820836	E005	478.7	ng/ml	45045	97.78							20220127_SR2DTOX_Ab
AB01974183	01	Ainno_16251	Ainnocence	AIN1-2_AINNL0002	Lot# MB15NO2511	TC00820836	E006	151.5	ng/ml	44285	96.13							20220127_SR2DTOX_Ab
AB01974183	01	Ainno_16251	Ainnocence	AIN1-2_AINNL0002	Lot# MB15NO2511	TC00820836	E007	47.94	ng/ml	44540	96.68							20220127_SR2DTOX_Ab
AB01974183	01	Ainno_16251	Ainnocence	AIN1-2_AINNL0002	Lot# MB15NO2511	TC00820836	E008	15.17	ng/ml	44605	96.82							20220127_SR2DTOX_Ab
AB01974183	01	Ainno_16251	Ainnocence	AIN1-2_AINNL0002	Lot# MB15NO2511	TC00820836	E009	4.801	ng/ml	43875	95.24							20220127_SR2DTOX_Ab
AB01974183	01	Ainno_16251	Ainnocence	AIN1-2_AINNL0002	Lot# MB15NO2511	TC00820836	E010	1.519	ng/ml	46780	101.55							20220127_SR2DTOX_Ab
AB01974183	01	Ainno_16251	Ainnocence	AIN1-2_AINNL0002	Lot# MB15NO2511	TC00820836	E011	0.4808	ng/ml	47385	102.87							20220127_SR2DTOX_Ab
AB01974183	01	Ainno_16251	Ainnocence	AIN1-2_AINNL0002	Lot# MB15NO2511	TC00820836	E012	0.1521	ng/ml	46175	100.24							20220127_SR2DTOX_Ab
AB01974183	01	Ainno_16251	Ainnocence	AIN1-2_AINNL0002	Lot# MB15NO2511	TC00820836	E013	0.04815	ng/ml	44245	96.04							20220127_SR2DTOX_Ab
AB01974183	01	Ainno_16251	Ainnocence	AIN1-2_AINNL0002	Lot# MB15NO2511	TC00820836	E014	0.01524	ng/ml	42145	91.48							20220127_SR2DTOX_Ab
AB01974183	01	Ainno_16251	Ainnocence	AIN1-2_AINNL0002	Lot# MB15NO2511	TC00820836	E015	0.004822	ng/ml	45070	97.83							20220127_SR2DTOX_Ab
AB01974183	01	Ainno_16251	Ainnocence	AIN1-2_AINNL0002	Lot# MB15NO2511	TC00820836	E016	0.001526	ng/ml	46790	101.57							20220127_SR2DTOX_Ab
AB01974183	01	Ainno_16251	Ainnocence	AIN1-2_AINNL0002	Lot# MB15NO2511	TC00820836	E017	0.0004828	ng/ml	44735	97.11							20220127_SR2DTOX_Ab
AB01974183	01	Ainno_16251	Ainnocence	AIN1-2_AINNL0002	Lot# MB15NO2511	TC00820836	E018	0.0001528	ng/ml	45055	97.8							20220127_SR2DTOX_Ab
AB01974183	01	Ainno_16251	Ainnocence	AIN1-2_AINNL0002	Lot# MB15NO2511	TC00820836	E019	4.835e-05	ng/ml	43755	94.98							20220127_SR2DTOX_Ab
AB01974183	01	Ainno_16251	Ainnocence	AIN1-2_AINNL0002	Lot# MB15NO2511	TC00820836	E020	1.53e-05	ng/ml	44655	96.93							20220127_SR2DTOX_Ab
AB01974183	01	Ainno_16251	Ainnocence	AIN1-2_AINNL0002	Lot# MB15NO2511	TC00820836	E021	4.842e-06	ng/ml	43160	93.68							20220127_SR2DTOX_Ab
AB01974183	01	Ainno_16251	Ainnocence	AIN1-2_AINNL0002	Lot# MB15NO2511	TC00820836	E022	1.532e-06	ng/ml	44305	96.17							20220127_SR2DTOX_Ab
AB01974184	01	Ainno_16251	Ainnocence	AIN1-4_AINNL0004	Lot# MB15NO4104	TC00820836	F003	5670	ng/ml	46610	101.18	>5670	Inactive	0.23			20	20220127_SR2DTOX_Ab
AB01974184	01	Ainno_16251	Ainnocence	AIN1-4_AINNL0004	Lot# MB15NO4104	TC00820836	F004	1794	ng/ml	45130	97.97							20220127_SR2DTOX_Ab
AB01974184	01	Ainno_16251	Ainnocence	AIN1-4_AINNL0004	Lot# MB15NO4104	TC00820836	F005	567.8	ng/ml	44725	97.08							20220127_SR2DTOX_Ab
AB01974184	01	Ainno_16251	Ainnocence	AIN1-4_AINNL0004	Lot# MB15NO4104	TC00820836	F006	179.7	ng/ml	44270	96.1							20220127_SR2DTOX_Ab
AB01974184	01	Ainno_16251	Ainnocence	AIN1-4_AINNL0004	Lot# MB15NO4104	TC00820836	F007	56.86	ng/ml	46175	100.24							20220127_SR2DTOX_Ab
AB01974184	01	Ainno_16251	Ainnocence	AIN1-4_AINNL0004	Lot# MB15NO4104	TC00820836	F008	17.99	ng/ml	45190	98.1							20220127_SR2DTOX_Ab
AB01974184	01	Ainno_16251	Ainnocence	AIN1-4_AINNL0004	Lot# MB15NO4104	TC00820836	F009	5.695	ng/ml	45510	98.79							20220127_SR2DTOX_Ab
AB01974184	01	Ainno_16251	Ainnocence	AIN1-4_AINNL0004	Lot# MB15NO4104	TC00820836	F010	1.802	ng/ml	45445	98.65							20220127_SR2DTOX_Ab
AB01974184	01	Ainno_16251	Ainnocence	AIN1-4_AINNL0004	Lot# MB15NO4104	TC00820836	F011	0.5703	ng/ml	45010	97.7							20220127_SR2DTOX_Ab
AB01974184	01	Ainno_16251	Ainnocence	AIN1-4_AINNL0004	Lot# MB15NO4104	TC00820836	F012	0.1805	ng/ml	49665	107.82							20220127_SR2DTOX_Ab
AB01974184	01	Ainno_16251	Ainnocence	AIN1-4_AINNL0004	Lot# MB15NO4104	TC00820836	F013	0.05711	ng/ml	46465	100.87							20220127_SR2DTOX_Ab
AB01974184	01	Ainno_16251	Ainnocence	AIN1-4_AINNL0004	Lot# MB15NO4104	TC00820836	F014	0.01807	ng/ml	45800	99.42							20220127_SR2DTOX_Ab
AB01974184	01	Ainno_16251	Ainnocence	AIN1-4_AINNL0004	Lot# MB15NO4104	TC00820836	F015	0.005719	ng/ml	45255	98.24							20220127_SR2DTOX_Ab
AB01974184	01	Ainno_16251	Ainnocence	AIN1-4_AINNL0004	Lot# MB15NO4104	TC00820836	F016	0.00181	ng/ml	45905	99.65							20220127_SR2DTOX_Ab
AB01974184	01	Ainno_16251	Ainnocence	AIN1-4_AINNL0004	Lot# MB15NO4104	TC00820836	F017	0.0005727	ng/ml	46175	100.24							20220127_SR2DTOX_Ab
AB01974184	01	Ainno_16251	Ainnocence	AIN1-4_AINNL0004	Lot# MB15NO4104	TC00820836	F018	0.0001812	ng/ml	44980	97.64							20220127_SR2DTOX_Ab
AB01974184	01	Ainno_16251	Ainnocence	AIN1-4_AINNL0004	Lot# MB15NO4104	TC00820836	F019	5.736e-05	ng/ml	43270	93.92							20220127_SR2DTOX_Ab
AB01974184	01	Ainno_16251	Ainnocence	AIN1-4_AINNL0004	Lot# MB15NO4104	TC00820836	F020	1.815e-05	ng/ml	47325	102.74							20220127_SR2DTOX_Ab
AB01974184	01	Ainno_16251	Ainnocence	AIN1-4_AINNL0004	Lot# MB15NO4104	TC00820836	F021	5.744e-06	ng/ml	45445	98.65							20220127_SR2DTOX_Ab
AB01974184	01	Ainno_16251	Ainnocence	AIN1-4_AINNL0004	Lot# MB15NO4104	TC00820836	F022	1.818e-06	ng/ml	45115	97.93							20220127_SR2DTOX_Ab
AB01974185	01	Ainno_16251	Ainnocence	AIN1-13_AINNL0013	Lot# MB15NO4113	TC00820836	G003	10670	ng/ml	47025	102.08	>10670	Inactive	0.17			20	20220127_SR2DTOX_Ab
AB01974185	01	Ainno_16251	Ainnocence	AIN1-13_AINNL0013	Lot# MB15NO4113	TC00820836	G004	3377	ng/ml	48965	106.3							20220127_SR2DTOX_Ab
AB01974185	01	Ainno_16251	Ainnocence	AIN1-13_AINNL0013	Lot# MB15NO4113	TC00820836	G005	1069	ng/ml	46925	101.87							20220127_SR2DTOX_Ab
AB01974185	01	Ainno_16251	Ainnocence	AIN1-13_AINNL0013	Lot# MB15NO4113	TC00820836	G006	338.1	ng/ml	44070	95.66							20220127_SR2DTOX_Ab
AB01974185	01	Ainno_16251	Ainnocence	AIN1-13_AINNL0013	Lot# MB15NO4113	TC00820836	G007	107	ng/ml	48120	104.46							20220127_SR2DTOX_Ab
AB01974185	01	Ainno_16251	Ainnocence	AIN1-13_AINNL0013	Lot# MB15NO4113	TC00820836	G008	33.86	ng/ml	43420	94.25							20220127_SR2DTOX_Ab
AB01974185	01	Ainno_16251	Ainnocence	AIN1-13_AINNL0013	Lot# MB15NO4113	TC00820836	G009	10.72	ng/ml	44625	96.87							20220127_SR2DTOX_Ab
AB01974185	01	Ainno_16251	Ainnocence	AIN1-13_AINNL0013	Lot# MB15NO4113	TC00820836	G010	3.391	ng/ml	47790	103.75							20220127_SR2DTOX_Ab
AB01974185	01	Ainno_16251	Ainnocence	AIN1-13_AINNL0013	Lot# MB15NO4113	TC00820836	G011	1.073	ng/ml	44595	96.8							20220127_SR2DTOX_Ab
AB01974185	01	Ainno_16251	Ainnocence	AIN1-13_AINNL0013	Lot# MB15NO4113	TC00820836	G012	0.3396	ng/ml	46505	100.95							20220127_SR2DTOX_Ab
AB01974185	01	Ainno_16251	Ainnocence	AIN1-13_AINNL0013	Lot# MB15NO4113	TC00820836	G013	0.1075	ng/ml	46110	100.1							20220127_SR2DTOX_Ab
AB01974185	01	Ainno_16251	Ainnocence	AIN1-13_AINNL0013	Lot# MB15NO4113	TC00820836	G014	0.03401	ng/ml	42245	91.69							20220127_SR2DTOX_Ab
AB01974185	01	Ainno_16251	Ainnocence	AIN1-13_AINNL0013	Lot# MB15NO4113	TC00820836	G015	0.01076	ng/ml	47685	103.52							20220127_SR2DTOX_Ab
AB01974185	01	Ainno_16251	Ainnocence	AIN1-13_AINNL0013	Lot# MB15NO4113	TC00820836	G016	0.003406	ng/ml	45020	97.73							20220127_SR2DTOX_Ab
AB01974185	01	Ainno_16251	Ainnocence	AIN1-13_AINNL0013	Lot# MB15NO4113	TC00820836	G017	0.001078	ng/ml	45130	97.97							20220127_SR2DTOX_Ab
AB01974185	01	Ainno_16251	Ainnocence	AIN1-13_AINNL0013	Lot# MB15NO4113	TC00820836	G018	0.0003411	ng/ml	44275	96.11							20220127_SR2DTOX_Ab
AB01974185	01	Ainno_16251	Ainnocence	AIN1-13_AINNL0013	Lot# MB15NO4113	TC00820836	G019	0.0001079	ng/ml	43730	94.92							20220127_SR2DTOX_Ab
AB01974185	01	Ainno_16251	Ainnocence	AIN1-13_AINNL0013	Lot# MB15NO4113	TC00820836	G020	3.416e-05	ng/ml	44795	97.24							20220127_SR2DTOX_Ab
AB01974185	01	Ainno_16251	Ainnocence	AIN1-13_AINNL0013	Lot# MB15NO4113	TC00820836	G021	1.081e-05	ng/ml	44220	95.99							20220127_SR2DTOX_Ab
AB01974185	01	Ainno_16251	Ainnocence	AIN1-13_AINNL0013	Lot# MB15NO4113	TC00820836	G022	3.421e-06	ng/ml	44715	97.06							20220127_SR2DTOX_Ab
AB01974186	01	Ainno_16251	Ainnocence	AIN1-15_AINNL0015	Lot# MB15NO4115	TC00820836	H003	10780	ng/ml	42860	93.03	>10780	Inactive	<-1000			20	20220127_SR2DTOX_Ab
AB01974186	01	Ainno_16251	Ainnocence	AIN1-15_AINNL0015	Lot# MB15NO4115	TC00820836	H004	3411	ng/ml	44110	95.75							20220127_SR2DTOX_Ab
AB01974186	01	Ainno_16251	Ainnocence	AIN1-15_AINNL0015	Lot# MB15NO4115	TC00820836	H005	1080	ng/ml	45835	99.5							20220127_SR2DTOX_Ab
AB01974186	01	Ainno_16251	Ainnocence	AIN1-15_AINNL0015	Lot# MB15NO4115	TC00820836	H006	341.6	ng/ml	44465	96.52							20220127_SR2DTOX_Ab
AB01974186	01	Ainno_16251	Ainnocence	AIN1-15_AINNL0015	Lot# MB15NO4115	TC00820836	H007	108.1	ng/ml	45290	98.31							20220127_SR2DTOX_Ab
AB01974186	01	Ainno_16251	Ainnocence	AIN1-15_AINNL0015	Lot# MB15NO4115	TC00820836	H008	34.21	ng/ml	46800	101.6							20220127_SR2DTOX_Ab
AB01974186	01	Ainno_16251	Ainnocence	AIN1-15_AINNL0015	Lot# MB15NO4115	TC00820836	H009	10.83	ng/ml	42230	91.66							20220127_SR2DTOX_Ab
AB01974186	01	Ainno_16251	Ainnocence	AIN1-15_AINNL0015	Lot# MB15NO4115	TC00820836	H010	3.426	ng/ml	45730	99.27							20220127_SR2DTOX_Ab
AB01974186	01	Ainno_16251	Ainnocence	AIN1-15_AINNL0015	Lot# MB15NO4115	TC00820836	H011	1.084	ng/ml	43060	93.47							20220127_SR2DTOX_Ab
AB01974186	01	Ainno_16251	Ainnocence	AIN1-15_AINNL0015	Lot# MB15NO4115	TC00820836	H012	0.3431	ng/ml	46745	101.48							20220127_SR2DTOX_Ab
AB01974186	01	Ainno_16251	Ainnocence	AIN1-15_AINNL0015	Lot# MB15NO4115	TC00820836	H013	0.1086	ng/ml	46515	100.98							20220127_SR2DTOX_Ab
AB01974186	01	Ainno_16251	Ainnocence	AIN1-15_AINNL0015	Lot# MB15NO4115	TC00820836	H014	0.03436	ng/ml	45785	99.39							20220127_SR2DTOX_Ab
AB01974186	01	Ainno_16251	Ainnocence	AIN1-15_AINNL0015	Lot# MB15NO4115	TC00820836	H015	0.01087	ng/ml	48030	104.27							20220127_SR2DTOX_Ab
AB01974186	01	Ainno_16251	Ainnocence	AIN1-15_AINNL0015	Lot# MB15NO4115	TC00820836	H016	0.003441	ng/ml	43995	95.5							20220127_SR2DTOX_Ab
AB01974186	01	Ainno_16251	Ainnocence	AIN1-15_AINNL0015	Lot# MB15NO4115	TC00820836	H017	0.001089	ng/ml	43780	95.03							20220127_SR2DTOX_Ab
AB01974186	01	Ainno_16251	Ainnocence	AIN1-15_AINNL0015	Lot# MB15NO4115	TC00820836	H018	0.0003446	ng/ml	43495	94.41							20220127_SR2DTOX_Ab
AB01974186	01	Ainno_16251	Ainnocence	AIN1-15_AINNL0015	Lot# MB15NO4115	TC00820836	H019	0.000109	ng/ml	45255	98.24							20220127_SR2DTOX_Ab
AB01974186	01	Ainno_16251	Ainnocence	AIN1-15_AINNL0015	Lot# MB15NO4115	TC00820836	H020	3.451e-05	ng/ml	44580	96.77							20220127_SR2DTOX_Ab
AB01974186	01	Ainno_16251	Ainnocence	AIN1-15_AINNL0015	Lot# MB15NO4115	TC00820836	H021	1.092e-05	ng/ml	42890	93.1							20220127_SR2DTOX_Ab
AB01974186	01	Ainno_16251	Ainnocence	AIN1-15_AINNL0015	Lot# MB15NO4115	TC00820836	H022	3.456e-06	ng/ml	44255	96.06							20220127_SR2DTOX_Ab
AB01974187	01	Ainno_16251	Ainnocence	AIN1-38_AINNL0038	Lot# MB15NO4138	TC00820836	I003	10890	ng/ml	46500	100.94	>10890	Inactive	0.86			20	20220127_SR2DTOX_Ab
AB01974187	01	Ainno_16251	Ainnocence	AIN1-38_AINNL0038	Lot# MB15NO4138	TC00820836	I004	3446	ng/ml	45660	99.12							20220127_SR2DTOX_Ab
AB01974187	01	Ainno_16251	Ainnocence	AIN1-38_AINNL0038	Lot# MB15NO4138	TC00820836	I005	1091	ng/ml	45630	99.05							20220127_SR2DTOX_Ab
AB01974187	01	Ainno_16251	Ainnocence	AIN1-38_AINNL0038	Lot# MB15NO4138	TC00820836	I006	345.1	ng/ml	46265	100.43							20220127_SR2DTOX_Ab
AB01974187	01	Ainno_16251	Ainnocence	AIN1-38_AINNL0038	Lot# MB15NO4138	TC00820836	I007	109.2	ng/ml	44060	95.64							20220127_SR2DTOX_Ab
AB01974187	01	Ainno_16251	Ainnocence	AIN1-38_AINNL0038	Lot# MB15NO4138	TC00820836	I008	34.56	ng/ml	46265	100.43							20220127_SR2DTOX_Ab
AB01974187	01	Ainno_16251	Ainnocence	AIN1-38_AINNL0038	Lot# MB15NO4138	TC00820836	I009	10.94	ng/ml	45455	98.67							20220127_SR2DTOX_Ab
AB01974187	01	Ainno_16251	Ainnocence	AIN1-38_AINNL0038	Lot# MB15NO4138	TC00820836	I010	3.461	ng/ml	44955	97.58							20220127_SR2DTOX_Ab
AB01974187	01	Ainno_16251	Ainnocence	AIN1-38_AINNL0038	Lot# MB15NO4138	TC00820836	I011	1.095	ng/ml	44265	96.09							20220127_SR2DTOX_Ab
AB01974187	01	Ainno_16251	Ainnocence	AIN1-38_AINNL0038	Lot# MB15NO4138	TC00820836	I012	0.3466	ng/ml	46685	101.35							20220127_SR2DTOX_Ab
AB01974187	01	Ainno_16251	Ainnocence	AIN1-38_AINNL0038	Lot# MB15NO4138	TC00820836	I013	0.1097	ng/ml	45925	99.69							20220127_SR2DTOX_Ab
AB01974187	01	Ainno_16251	Ainnocence	AIN1-38_AINNL0038	Lot# MB15NO4138	TC00820836	I014	0.03471	ng/ml	46140	100.16							20220127_SR2DTOX_Ab
AB01974187	01	Ainno_16251	Ainnocence	AIN1-38_AINNL0038	Lot# MB15NO4138	TC00820836	I015	0.01098	ng/ml	45380	98.51							20220127_SR2DTOX_Ab
AB01974187	01	Ainno_16251	Ainnocence	AIN1-38_AINNL0038	Lot# MB15NO4138	TC00820836	I016	0.003476	ng/ml	46090	100.05							20220127_SR2DTOX_Ab
AB01974187	01	Ainno_16251	Ainnocence	AIN1-38_AINNL0038	Lot# MB15NO4138	TC00820836	I017	0.0011	ng/ml	45395	98.54							20220127_SR2DTOX_Ab
AB01974187	01	Ainno_16251	Ainnocence	AIN1-38_AINNL0038	Lot# MB15NO4138	TC00820836	I018	0.0003481	ng/ml	44910	97.49							20220127_SR2DTOX_Ab
AB01974187	01	Ainno_16251	Ainnocence	AIN1-38_AINNL0038	Lot# MB15NO4138	TC00820836	I019	0.0001102	ng/ml	46715	101.41							20220127_SR2DTOX_Ab
AB01974187	01	Ainno_16251	Ainnocence	AIN1-38_AINNL0038	Lot# MB15NO4138	TC00820836	I020	3.486e-05	ng/ml	46215	100.32							20220127_SR2DTOX_Ab
AB01974187	01	Ainno_16251	Ainnocence	AIN1-38_AINNL0038	Lot# MB15NO4138	TC00820836	I021	1.103e-05	ng/ml	46080	100.03							20220127_SR2DTOX_Ab
AB01974187	01	Ainno_16251	Ainnocence	AIN1-38_AINNL0038	Lot# MB15NO4138	TC00820836	I022	3.491e-06	ng/ml	44120	95.77							20220127_SR2DTOX_Ab
AB01974188	01	Ainno_16251	Ainnocence	AIN1-39_AINNL0039	Lot# MB15NO4139	TC00820836	J003	10670	ng/ml	48085	104.39	>10670	Inactive	0.18			20	20220127_SR2DTOX_Ab
AB01974188	01	Ainno_16251	Ainnocence	AIN1-39_AINNL0039	Lot# MB15NO4139	TC00820836	J004	3377	ng/ml	46665	101.3							20220127_SR2DTOX_Ab
AB01974188	01	Ainno_16251	Ainnocence	AIN1-39_AINNL0039	Lot# MB15NO4139	TC00820836	J005	1069	ng/ml	48780	105.9							20220127_SR2DTOX_Ab
AB01974188	01	Ainno_16251	Ainnocence	AIN1-39_AINNL0039	Lot# MB15NO4139	TC00820836	J006	338.1	ng/ml	44970	97.62							20220127_SR2DTOX_Ab
AB01974188	01	Ainno_16251	Ainnocence	AIN1-39_AINNL0039	Lot# MB15NO4139	TC00820836	J007	107	ng/ml	47405	102.91							20220127_SR2DTOX_Ab
AB01974188	01	Ainno_16251	Ainnocence	AIN1-39_AINNL0039	Lot# MB15NO4139	TC00820836	J008	33.86	ng/ml	48055	104.32							20220127_SR2DTOX_Ab
AB01974188	01	Ainno_16251	Ainnocence	AIN1-39_AINNL0039	Lot# MB15NO4139	TC00820836	J009	10.72	ng/ml	46465	100.87							20220127_SR2DTOX_Ab
AB01974188	01	Ainno_16251	Ainnocence	AIN1-39_AINNL0039	Lot# MB15NO4139	TC00820836	J010	3.391	ng/ml	46325	100.56							20220127_SR2DTOX_Ab
AB01974188	01	Ainno_16251	Ainnocence	AIN1-39_AINNL0039	Lot# MB15NO4139	TC00820836	J011	1.073	ng/ml	47060	102.16							20220127_SR2DTOX_Ab
AB01974188	01	Ainno_16251	Ainnocence	AIN1-39_AINNL0039	Lot# MB15NO4139	TC00820836	J012	0.3396	ng/ml	45465	98.69							20220127_SR2DTOX_Ab
AB01974188	01	Ainno_16251	Ainnocence	AIN1-39_AINNL0039	Lot# MB15NO4139	TC00820836	J013	0.1075	ng/ml	45595	98.98							20220127_SR2DTOX_Ab
AB01974188	01	Ainno_16251	Ainnocence	AIN1-39_AINNL0039	Lot# MB15NO4139	TC00820836	J014	0.03401	ng/ml	46265	100.43							20220127_SR2DTOX_Ab
AB01974188	01	Ainno_16251	Ainnocence	AIN1-39_AINNL0039	Lot# MB15NO4139	TC00820836	J015	0.01076	ng/ml	45930	99.7							20220127_SR2DTOX_Ab
AB01974188	01	Ainno_16251	Ainnocence	AIN1-39_AINNL0039	Lot# MB15NO4139	TC00820836	J016	0.003406	ng/ml	44560	96.73							20220127_SR2DTOX_Ab
AB01974188	01	Ainno_16251	Ainnocence	AIN1-39_AINNL0039	Lot# MB15NO4139	TC00820836	J017	0.001078	ng/ml	44595	96.8							20220127_SR2DTOX_Ab
AB01974188	01	Ainno_16251	Ainnocence	AIN1-39_AINNL0039	Lot# MB15NO4139	TC00820836	J018	0.0003411	ng/ml	45455	98.67							20220127_SR2DTOX_Ab
AB01974188	01	Ainno_16251	Ainnocence	AIN1-39_AINNL0039	Lot# MB15NO4139	TC00820836	J019	0.0001079	ng/ml	41540	90.16							20220127_SR2DTOX_Ab
AB01974188	01	Ainno_16251	Ainnocence	AIN1-39_AINNL0039	Lot# MB15NO4139	TC00820836	J020	3.416e-05	ng/ml	44515	96.63							20220127_SR2DTOX_Ab
AB01974188	01	Ainno_16251	Ainnocence	AIN1-39_AINNL0039	Lot# MB15NO4139	TC00820836	J021	1.081e-05	ng/ml	45470	98.7							20220127_SR2DTOX_Ab
AB01974188	01	Ainno_16251	Ainnocence	AIN1-39_AINNL0039	Lot# MB15NO4139	TC00820836	J022	3.421e-06	ng/ml	45600	98.99							20220127_SR2DTOX_Ab
AB01974189	01	Ainno_16251	Ainnocence	AIN1-40_AINNL0040	Lot# MB15NO4140	TC00820836	K003	10780	ng/ml	44035	95.59	>10780	Inactive	0.13			20	20220127_SR2DTOX_Ab
AB01974189	01	Ainno_16251	Ainnocence	AIN1-40_AINNL0040	Lot# MB15NO4140	TC00820836	K004	3411	ng/ml	45935	99.72							20220127_SR2DTOX_Ab
AB01974189	01	Ainno_16251	Ainnocence	AIN1-40_AINNL0040	Lot# MB15NO4140	TC00820836	K005	1080	ng/ml	44895	97.45							20220127_SR2DTOX_Ab
AB01974189	01	Ainno_16251	Ainnocence	AIN1-40_AINNL0040	Lot# MB15NO4140	TC00820836	K006	341.6	ng/ml	45475	98.72							20220127_SR2DTOX_Ab
AB01974189	01	Ainno_16251	Ainnocence	AIN1-40_AINNL0040	Lot# MB15NO4140	TC00820836	K007	108.1	ng/ml	46645	101.26							20220127_SR2DTOX_Ab
AB01974189	01	Ainno_16251	Ainnocence	AIN1-40_AINNL0040	Lot# MB15NO4140	TC00820836	K008	34.21	ng/ml	45580	98.94							20220127_SR2DTOX_Ab
AB01974189	01	Ainno_16251	Ainnocence	AIN1-40_AINNL0040	Lot# MB15NO4140	TC00820836	K009	10.83	ng/ml	46250	100.4							20220127_SR2DTOX_Ab
AB01974189	01	Ainno_16251	Ainnocence	AIN1-40_AINNL0040	Lot# MB15NO4140	TC00820836	K010	3.426	ng/ml	47370	102.83							20220127_SR2DTOX_Ab
AB01974189	01	Ainno_16251	Ainnocence	AIN1-40_AINNL0040	Lot# MB15NO4140	TC00820836	K011	1.084	ng/ml	45280	98.29							20220127_SR2DTOX_Ab
AB01974189	01	Ainno_16251	Ainnocence	AIN1-40_AINNL0040	Lot# MB15NO4140	TC00820836	K012	0.3431	ng/ml	45565	98.91							20220127_SR2DTOX_Ab
AB01974189	01	Ainno_16251	Ainnocence	AIN1-40_AINNL0040	Lot# MB15NO4140	TC00820836	K013	0.1086	ng/ml	43220	93.81							20220127_SR2DTOX_Ab
AB01974189	01	Ainno_16251	Ainnocence	AIN1-40_AINNL0040	Lot# MB15NO4140	TC00820836	K014	0.03436	ng/ml	44895	97.45							20220127_SR2DTOX_Ab
AB01974189	01	Ainno_16251	Ainnocence	AIN1-40_AINNL0040	Lot# MB15NO4140	TC00820836	K015	0.01087	ng/ml	45475	98.72							20220127_SR2DTOX_Ab
AB01974189	01	Ainno_16251	Ainnocence	AIN1-40_AINNL0040	Lot# MB15NO4140	TC00820836	K016	0.003441	ng/ml	44245	96.04							20220127_SR2DTOX_Ab
AB01974189	01	Ainno_16251	Ainnocence	AIN1-40_AINNL0040	Lot# MB15NO4140	TC00820836	K017	0.001089	ng/ml	43935	95.37							20220127_SR2DTOX_Ab
AB01974189	01	Ainno_16251	Ainnocence	AIN1-40_AINNL0040	Lot# MB15NO4140	TC00820836	K018	0.0003446	ng/ml	44205	95.95							20220127_SR2DTOX_Ab
AB01974189	01	Ainno_16251	Ainnocence	AIN1-40_AINNL0040	Lot# MB15NO4140	TC00820836	K019	0.000109	ng/ml	40695	88.33							20220127_SR2DTOX_Ab
AB01974189	01	Ainno_16251	Ainnocence	AIN1-40_AINNL0040	Lot# MB15NO4140	TC00820836	K020	3.451e-05	ng/ml	44905	97.48							20220127_SR2DTOX_Ab
AB01974189	01	Ainno_16251	Ainnocence	AIN1-40_AINNL0040	Lot# MB15NO4140	TC00820836	K021	1.092e-05	ng/ml	44800	97.25							20220127_SR2DTOX_Ab
AB01974189	01	Ainno_16251	Ainnocence	AIN1-40_AINNL0040	Lot# MB15NO4140	TC00820836	K022	3.456e-06	ng/ml	42915	93.15							20220127_SR2DTOX_Ab
AB01974190	01	Ainno_16251	Ainnocence	AIN1-41_AINNL0041	Lot# MB15NO4141	TC00820836	L003	10890	ng/ml	45745	99.3	>10890	Inactive	0.17			20	20220127_SR2DTOX_Ab
AB01974190	01	Ainno_16251	Ainnocence	AIN1-41_AINNL0041	Lot# MB15NO4141	TC00820836	L004	3446	ng/ml	45415	98.58							20220127_SR2DTOX_Ab
AB01974190	01	Ainno_16251	Ainnocence	AIN1-41_AINNL0041	Lot# MB15NO4141	TC00820836	L005	1091	ng/ml	45310	98.36							20220127_SR2DTOX_Ab
AB01974190	01	Ainno_16251	Ainnocence	AIN1-41_AINNL0041	Lot# MB15NO4141	TC00820836	L006	345.1	ng/ml	46410	100.75							20220127_SR2DTOX_Ab
AB01974190	01	Ainno_16251	Ainnocence	AIN1-41_AINNL0041	Lot# MB15NO4141	TC00820836	L007	109.2	ng/ml	46740	101.46							20220127_SR2DTOX_Ab
AB01974190	01	Ainno_16251	Ainnocence	AIN1-41_AINNL0041	Lot# MB15NO4141	TC00820836	L008	34.56	ng/ml	44185	95.91							20220127_SR2DTOX_Ab
AB01974190	01	Ainno_16251	Ainnocence	AIN1-41_AINNL0041	Lot# MB15NO4141	TC00820836	L009	10.94	ng/ml	48265	104.78							20220127_SR2DTOX_Ab
AB01974190	01	Ainno_16251	Ainnocence	AIN1-41_AINNL0041	Lot# MB15NO4141	TC00820836	L010	3.461	ng/ml	44145	95.82							20220127_SR2DTOX_Ab
AB01974190	01	Ainno_16251	Ainnocence	AIN1-41_AINNL0041	Lot# MB15NO4141	TC00820836	L011	1.095	ng/ml	45190	98.1							20220127_SR2DTOX_Ab
AB01974190	01	Ainno_16251	Ainnocence	AIN1-41_AINNL0041	Lot# MB15NO4141	TC00820836	L012	0.3466	ng/ml	44075	95.67							20220127_SR2DTOX_Ab
AB01974190	01	Ainno_16251	Ainnocence	AIN1-41_AINNL0041	Lot# MB15NO4141	TC00820836	L013	0.1097	ng/ml	43220	93.81							20220127_SR2DTOX_Ab
AB01974190	01	Ainno_16251	Ainnocence	AIN1-41_AINNL0041	Lot# MB15NO4141	TC00820836	L014	0.03471	ng/ml	44245	96.04							20220127_SR2DTOX_Ab
AB01974190	01	Ainno_16251	Ainnocence	AIN1-41_AINNL0041	Lot# MB15NO4141	TC00820836	L015	0.01098	ng/ml	44060	95.64							20220127_SR2DTOX_Ab
AB01974190	01	Ainno_16251	Ainnocence	AIN1-41_AINNL0041	Lot# MB15NO4141	TC00820836	L016	0.003476	ng/ml	44260	96.07							20220127_SR2DTOX_Ab
AB01974190	01	Ainno_16251	Ainnocence	AIN1-41_AINNL0041	Lot# MB15NO4141	TC00820836	L017	0.0011	ng/ml	43930	95.36							20220127_SR2DTOX_Ab
AB01974190	01	Ainno_16251	Ainnocence	AIN1-41_AINNL0041	Lot# MB15NO4141	TC00820836	L018	0.0003481	ng/ml	44280	96.12							20220127_SR2DTOX_Ab
AB01974190	01	Ainno_16251	Ainnocence	AIN1-41_AINNL0041	Lot# MB15NO4141	TC00820836	L019	0.0001102	ng/ml	43485	94.39							20220127_SR2DTOX_Ab
AB01974190	01	Ainno_16251	Ainnocence	AIN1-41_AINNL0041	Lot# MB15NO4141	TC00820836	L020	3.486e-05	ng/ml	45595	98.98							20220127_SR2DTOX_Ab
AB01974190	01	Ainno_16251	Ainnocence	AIN1-41_AINNL0041	Lot# MB15NO4141	TC00820836	L021	1.103e-05	ng/ml	43355	94.11							20220127_SR2DTOX_Ab
AB01974190	01	Ainno_16251	Ainnocence	AIN1-41_AINNL0041	Lot# MB15NO4141	TC00820836	L022	3.491e-06	ng/ml	43975	95.45							20220127_SR2DTOX_Ab
AB01974191	01	Ainno_16251	Ainnocence	AIN1-42_AINNL0042	Lot# MB15NO4142	TC00820836	M003	10890	ng/ml	45535	98.85	>10890	Inactive	<-1000			20	20220127_SR2DTOX_Ab
AB01974191	01	Ainno_16251	Ainnocence	AIN1-42_AINNL0042	Lot# MB15NO4142	TC00820836	M004	3446	ng/ml	44810	97.27							20220127_SR2DTOX_Ab
AB01974191	01	Ainno_16251	Ainnocence	AIN1-42_AINNL0042	Lot# MB15NO4142	TC00820836	M005	1091	ng/ml	45630	99.05							20220127_SR2DTOX_Ab
AB01974191	01	Ainno_16251	Ainnocence	AIN1-42_AINNL0042	Lot# MB15NO4142	TC00820836	M006	345.1	ng/ml	44050	95.62							20220127_SR2DTOX_Ab
AB01974191	01	Ainno_16251	Ainnocence	AIN1-42_AINNL0042	Lot# MB15NO4142	TC00820836	M007	109.2	ng/ml	44035	95.59							20220127_SR2DTOX_Ab
AB01974191	01	Ainno_16251	Ainnocence	AIN1-42_AINNL0042	Lot# MB15NO4142	TC00820836	M008	34.56	ng/ml	44600	96.81							20220127_SR2DTOX_Ab
AB01974191	01	Ainno_16251	Ainnocence	AIN1-42_AINNL0042	Lot# MB15NO4142	TC00820836	M009	10.94	ng/ml	43705	94.87							20220127_SR2DTOX_Ab
AB01974191	01	Ainno_16251	Ainnocence	AIN1-42_AINNL0042	Lot# MB15NO4142	TC00820836	M010	3.461	ng/ml	47445	103							20220127_SR2DTOX_Ab
AB01974191	01	Ainno_16251	Ainnocence	AIN1-42_AINNL0042	Lot# MB15NO4142	TC00820836	M011	1.095	ng/ml	46140	100.16							20220127_SR2DTOX_Ab
AB01974191	01	Ainno_16251	Ainnocence	AIN1-42_AINNL0042	Lot# MB15NO4142	TC00820836	M012	0.3466	ng/ml	44635	96.89							20220127_SR2DTOX_Ab
AB01974191	01	Ainno_16251	Ainnocence	AIN1-42_AINNL0042	Lot# MB15NO4142	TC00820836	M013	0.1097	ng/ml	46670	101.31							20220127_SR2DTOX_Ab
AB01974191	01	Ainno_16251	Ainnocence	AIN1-42_AINNL0042	Lot# MB15NO4142	TC00820836	M014	0.03471	ng/ml	45460	98.68							20220127_SR2DTOX_Ab
AB01974191	01	Ainno_16251	Ainnocence	AIN1-42_AINNL0042	Lot# MB15NO4142	TC00820836	M015	0.01098	ng/ml	50010	108.57							20220127_SR2DTOX_Ab
AB01974191	01	Ainno_16251	Ainnocence	AIN1-42_AINNL0042	Lot# MB15NO4142	TC00820836	M016	0.003476	ng/ml	44795	97.24							20220127_SR2DTOX_Ab
AB01974191	01	Ainno_16251	Ainnocence	AIN1-42_AINNL0042	Lot# MB15NO4142	TC00820836	M017	0.0011	ng/ml	46015	99.89							20220127_SR2DTOX_Ab
AB01974191	01	Ainno_16251	Ainnocence	AIN1-42_AINNL0042	Lot# MB15NO4142	TC00820836	M018	0.0003481	ng/ml	46480	100.9							20220127_SR2DTOX_Ab
AB01974191	01	Ainno_16251	Ainnocence	AIN1-42_AINNL0042	Lot# MB15NO4142	TC00820836	M019	0.0001102	ng/ml	44445	96.48							20220127_SR2DTOX_Ab
AB01974191	01	Ainno_16251	Ainnocence	AIN1-42_AINNL0042	Lot# MB15NO4142	TC00820836	M020	3.486e-05	ng/ml	42505	92.26							20220127_SR2DTOX_Ab
AB01974191	01	Ainno_16251	Ainnocence	AIN1-42_AINNL0042	Lot# MB15NO4142	TC00820836	M021	1.103e-05	ng/ml	44825	97.3							20220127_SR2DTOX_Ab
AB01974191	01	Ainno_16251	Ainnocence	AIN1-42_AINNL0042	Lot# MB15NO4142	TC00820836	M022	3.491e-06	ng/ml	41965	91.09							20220127_SR2DTOX_Ab
AB01974192	01	Ainno_16251	Ainnocence	AIN1-11_AINNL0011	Lot# MB15NO4111	TC00820836	N003	5440	ng/ml	45515	98.8	>5440	Inactive	0.15			20	20220127_SR2DTOX_Ab
AB01974192	01	Ainno_16251	Ainnocence	AIN1-11_AINNL0011	Lot# MB15NO4111	TC00820836	N004	1722	ng/ml	46210	100.31							20220127_SR2DTOX_Ab
AB01974192	01	Ainno_16251	Ainnocence	AIN1-11_AINNL0011	Lot# MB15NO4111	TC00820836	N005	544.8	ng/ml	45510	98.79							20220127_SR2DTOX_Ab
AB01974192	01	Ainno_16251	Ainnocence	AIN1-11_AINNL0011	Lot# MB15NO4111	TC00820836	N006	172.4	ng/ml	45350	98.44							20220127_SR2DTOX_Ab
AB01974192	01	Ainno_16251	Ainnocence	AIN1-11_AINNL0011	Lot# MB15NO4111	TC00820836	N007	54.56	ng/ml	46050	99.97							20220127_SR2DTOX_Ab
AB01974192	01	Ainno_16251	Ainnocence	AIN1-11_AINNL0011	Lot# MB15NO4111	TC00820836	N008	17.26	ng/ml	45270	98.27							20220127_SR2DTOX_Ab
AB01974192	01	Ainno_16251	Ainnocence	AIN1-11_AINNL0011	Lot# MB15NO4111	TC00820836	N009	5.464	ng/ml	46245	100.39							20220127_SR2DTOX_Ab
AB01974192	01	Ainno_16251	Ainnocence	AIN1-11_AINNL0011	Lot# MB15NO4111	TC00820836	N010	1.729	ng/ml	45715	99.24							20220127_SR2DTOX_Ab
AB01974192	01	Ainno_16251	Ainnocence	AIN1-11_AINNL0011	Lot# MB15NO4111	TC00820836	N011	0.5471	ng/ml	45390	98.53							20220127_SR2DTOX_Ab
AB01974192	01	Ainno_16251	Ainnocence	AIN1-11_AINNL0011	Lot# MB15NO4111	TC00820836	N012	0.1731	ng/ml	47770	103.7							20220127_SR2DTOX_Ab
AB01974192	01	Ainno_16251	Ainnocence	AIN1-11_AINNL0011	Lot# MB15NO4111	TC00820836	N013	0.05479	ng/ml	44155	95.85							20220127_SR2DTOX_Ab
AB01974192	01	Ainno_16251	Ainnocence	AIN1-11_AINNL0011	Lot# MB15NO4111	TC00820836	N014	0.01734	ng/ml	43150	93.66							20220127_SR2DTOX_Ab
AB01974192	01	Ainno_16251	Ainnocence	AIN1-11_AINNL0011	Lot# MB15NO4111	TC00820836	N015	0.005487	ng/ml	45765	99.35							20220127_SR2DTOX_Ab
AB01974192	01	Ainno_16251	Ainnocence	AIN1-11_AINNL0011	Lot# MB15NO4111	TC00820836	N016	0.001736	ng/ml	44395	96.37							20220127_SR2DTOX_Ab
AB01974192	01	Ainno_16251	Ainnocence	AIN1-11_AINNL0011	Lot# MB15NO4111	TC00820836	N017	0.0005495	ng/ml	45225	98.17							20220127_SR2DTOX_Ab
AB01974192	01	Ainno_16251	Ainnocence	AIN1-11_AINNL0011	Lot# MB15NO4111	TC00820836	N018	0.0001739	ng/ml	45145	98							20220127_SR2DTOX_Ab
AB01974192	01	Ainno_16251	Ainnocence	AIN1-11_AINNL0011	Lot# MB15NO4111	TC00820836	N019	5.503e-05	ng/ml	42760	92.81							20220127_SR2DTOX_Ab
AB01974192	01	Ainno_16251	Ainnocence	AIN1-11_AINNL0011	Lot# MB15NO4111	TC00820836	N020	1.741e-05	ng/ml	44320	96.2							20220127_SR2DTOX_Ab
AB01974192	01	Ainno_16251	Ainnocence	AIN1-11_AINNL0011	Lot# MB15NO4111	TC00820836	N021	5.511e-06	ng/ml	44710	97.05							20220127_SR2DTOX_Ab
AB01974192	01	Ainno_16251	Ainnocence	AIN1-11_AINNL0011	Lot# MB15NO4111	TC00820836	N022	1.744e-06	ng/ml	44345	96.26							20220127_SR2DTOX_Ab
AB01974193	01	Ainno_16251	Ainnocence	AIN1-14_AINNL0014	Lot# MB15NO4114	TC00820836	O003	11890	ng/ml	43770	95.01	>11890	Inactive	<-1000			20	20220127_SR2DTOX_Ab
AB01974193	01	Ainno_16251	Ainnocence	AIN1-14_AINNL0014	Lot# MB15NO4114	TC00820836	O004	3763	ng/ml	45675	99.15							20220127_SR2DTOX_Ab
AB01974193	01	Ainno_16251	Ainnocence	AIN1-14_AINNL0014	Lot# MB15NO4114	TC00820836	O005	1191	ng/ml	46780	101.55							20220127_SR2DTOX_Ab
AB01974193	01	Ainno_16251	Ainnocence	AIN1-14_AINNL0014	Lot# MB15NO4114	TC00820836	O006	376.8	ng/ml	45620	99.03							20220127_SR2DTOX_Ab
AB01974193	01	Ainno_16251	Ainnocence	AIN1-14_AINNL0014	Lot# MB15NO4114	TC00820836	O007	119.2	ng/ml	44695	97.02							20220127_SR2DTOX_Ab
AB01974193	01	Ainno_16251	Ainnocence	AIN1-14_AINNL0014	Lot# MB15NO4114	TC00820836	O008	37.74	ng/ml	45570	98.92							20220127_SR2DTOX_Ab
AB01974193	01	Ainno_16251	Ainnocence	AIN1-14_AINNL0014	Lot# MB15NO4114	TC00820836	O009	11.94	ng/ml	45385	98.52							20220127_SR2DTOX_Ab
AB01974193	01	Ainno_16251	Ainnocence	AIN1-14_AINNL0014	Lot# MB15NO4114	TC00820836	O010	3.779	ng/ml	44480	96.55							20220127_SR2DTOX_Ab
AB01974193	01	Ainno_16251	Ainnocence	AIN1-14_AINNL0014	Lot# MB15NO4114	TC00820836	O011	1.196	ng/ml	44145	95.82							20220127_SR2DTOX_Ab
AB01974193	01	Ainno_16251	Ainnocence	AIN1-14_AINNL0014	Lot# MB15NO4114	TC00820836	O012	0.3784	ng/ml	49295	107.02							20220127_SR2DTOX_Ab
AB01974193	01	Ainno_16251	Ainnocence	AIN1-14_AINNL0014	Lot# MB15NO4114	TC00820836	O013	0.1198	ng/ml	47625	103.39							20220127_SR2DTOX_Ab
AB01974193	01	Ainno_16251	Ainnocence	AIN1-14_AINNL0014	Lot# MB15NO4114	TC00820836	O014	0.0379	ng/ml	42940	93.21							20220127_SR2DTOX_Ab
AB01974193	01	Ainno_16251	Ainnocence	AIN1-14_AINNL0014	Lot# MB15NO4114	TC00820836	O015	0.01199	ng/ml	43630	94.7							20220127_SR2DTOX_Ab
AB01974193	01	Ainno_16251	Ainnocence	AIN1-14_AINNL0014	Lot# MB15NO4114	TC00820836	O016	0.003795	ng/ml	43840	95.16							20220127_SR2DTOX_Ab
AB01974193	01	Ainno_16251	Ainnocence	AIN1-14_AINNL0014	Lot# MB15NO4114	TC00820836	O017	0.001201	ng/ml	43195	93.76							20220127_SR2DTOX_Ab
AB01974193	01	Ainno_16251	Ainnocence	AIN1-14_AINNL0014	Lot# MB15NO4114	TC00820836	O018	0.0003801	ng/ml	46905	101.82							20220127_SR2DTOX_Ab
AB01974193	01	Ainno_16251	Ainnocence	AIN1-14_AINNL0014	Lot# MB15NO4114	TC00820836	O019	0.0001203	ng/ml	44875	97.41							20220127_SR2DTOX_Ab
AB01974193	01	Ainno_16251	Ainnocence	AIN1-14_AINNL0014	Lot# MB15NO4114	TC00820836	O020	3.806e-05	ng/ml	43805	95.09							20220127_SR2DTOX_Ab
AB01974193	01	Ainno_16251	Ainnocence	AIN1-14_AINNL0014	Lot# MB15NO4114	TC00820836	O021	1.205e-05	ng/ml	43870	95.23							20220127_SR2DTOX_Ab
AB01974193	01	Ainno_16251	Ainnocence	AIN1-14_AINNL0014	Lot# MB15NO4114	TC00820836	O022	3.812e-06	ng/ml	44195	95.93							20220127_SR2DTOX_Ab
AB01974194	01	Ainno_16251	Ainnocence	AIN1-17_AINNL0017	Lot# MB15NO4117	TC00820836	P003	11780	ng/ml	44745	97.13	>11780	Inactive	0.07			20	20220127_SR2DTOX_Ab
AB01974194	01	Ainno_16251	Ainnocence	AIN1-17_AINNL0017	Lot# MB15NO4117	TC00820836	P004	3728	ng/ml	43150	93.66							20220127_SR2DTOX_Ab
AB01974194	01	Ainno_16251	Ainnocence	AIN1-17_AINNL0017	Lot# MB15NO4117	TC00820836	P005	1180	ng/ml	45060	97.81							20220127_SR2DTOX_Ab
AB01974194	01	Ainno_16251	Ainnocence	AIN1-17_AINNL0017	Lot# MB15NO4117	TC00820836	P006	373.3	ng/ml	42375	91.98							20220127_SR2DTOX_Ab
AB01974194	01	Ainno_16251	Ainnocence	AIN1-17_AINNL0017	Lot# MB15NO4117	TC00820836	P007	118.1	ng/ml	44780	97.2							20220127_SR2DTOX_Ab
AB01974194	01	Ainno_16251	Ainnocence	AIN1-17_AINNL0017	Lot# MB15NO4117	TC00820836	P008	37.39	ng/ml	44690	97.01							20220127_SR2DTOX_Ab
AB01974194	01	Ainno_16251	Ainnocence	AIN1-17_AINNL0017	Lot# MB15NO4117	TC00820836	P009	11.83	ng/ml	44420	96.42							20220127_SR2DTOX_Ab
AB01974194	01	Ainno_16251	Ainnocence	AIN1-17_AINNL0017	Lot# MB15NO4117	TC00820836	P010	3.744	ng/ml	44275	96.11							20220127_SR2DTOX_Ab
AB01974194	01	Ainno_16251	Ainnocence	AIN1-17_AINNL0017	Lot# MB15NO4117	TC00820836	P011	1.185	ng/ml	45505	98.78							20220127_SR2DTOX_Ab
AB01974194	01	Ainno_16251	Ainnocence	AIN1-17_AINNL0017	Lot# MB15NO4117	TC00820836	P012	0.3749	ng/ml	42585	92.43							20220127_SR2DTOX_Ab
AB01974194	01	Ainno_16251	Ainnocence	AIN1-17_AINNL0017	Lot# MB15NO4117	TC00820836	P013	0.1187	ng/ml	44615	96.85							20220127_SR2DTOX_Ab
AB01974194	01	Ainno_16251	Ainnocence	AIN1-17_AINNL0017	Lot# MB15NO4117	TC00820836	P014	0.03755	ng/ml	45790	99.4							20220127_SR2DTOX_Ab
AB01974194	01	Ainno_16251	Ainnocence	AIN1-17_AINNL0017	Lot# MB15NO4117	TC00820836	P015	0.01188	ng/ml	44465	96.52							20220127_SR2DTOX_Ab
AB01974194	01	Ainno_16251	Ainnocence	AIN1-17_AINNL0017	Lot# MB15NO4117	TC00820836	P016	0.00376	ng/ml	45125	97.95							20220127_SR2DTOX_Ab
AB01974194	01	Ainno_16251	Ainnocence	AIN1-17_AINNL0017	Lot# MB15NO4117	TC00820836	P017	0.00119	ng/ml	43765	95							20220127_SR2DTOX_Ab
AB01974194	01	Ainno_16251	Ainnocence	AIN1-17_AINNL0017	Lot# MB15NO4117	TC00820836	P018	0.0003766	ng/ml	43810	95.1							20220127_SR2DTOX_Ab
AB01974194	01	Ainno_16251	Ainnocence	AIN1-17_AINNL0017	Lot# MB15NO4117	TC00820836	P019	0.0001192	ng/ml	42520	92.29							20220127_SR2DTOX_Ab
AB01974194	01	Ainno_16251	Ainnocence	AIN1-17_AINNL0017	Lot# MB15NO4117	TC00820836	P020	3.771e-05	ng/ml	45390	98.53							20220127_SR2DTOX_Ab
AB01974194	01	Ainno_16251	Ainnocence	AIN1-17_AINNL0017	Lot# MB15NO4117	TC00820836	P021	1.193e-05	ng/ml	44180	95.9							20220127_SR2DTOX_Ab
AB01974194	01	Ainno_16251	Ainnocence	AIN1-17_AINNL0017	Lot# MB15NO4117	TC00820836	P022	3.777e-06	ng/ml	43285	93.95							20220127_SR2DTOX_Ab
AB01974195	01	Ainno_16251	Ainnocence	AIN1-12_AINNL0012	Lot# MB15NO2405	TC00820839	A003	41220	ng/ml	47840	104.37	>41220	Inactive	0.21			20	20220127_SR2DTOX_Ab
AB01974195	01	Ainno_16251	Ainnocence	AIN1-12_AINNL0012	Lot# MB15NO2405	TC00820839	A004	13040	ng/ml	45345	98.92							20220127_SR2DTOX_Ab
AB01974195	01	Ainno_16251	Ainnocence	AIN1-12_AINNL0012	Lot# MB15NO2405	TC00820839	A005	4128	ng/ml	46820	102.14							20220127_SR2DTOX_Ab
AB01974195	01	Ainno_16251	Ainnocence	AIN1-12_AINNL0012	Lot# MB15NO2405	TC00820839	A006	1306	ng/ml	45515	99.29							20220127_SR2DTOX_Ab
AB01974195	01	Ainno_16251	Ainnocence	AIN1-12_AINNL0012	Lot# MB15NO2405	TC00820839	A007	413.4	ng/ml	44760	97.64							20220127_SR2DTOX_Ab
AB01974195	01	Ainno_16251	Ainnocence	AIN1-12_AINNL0012	Lot# MB15NO2405	TC00820839	A008	130.8	ng/ml	47365	103.33							20220127_SR2DTOX_Ab
AB01974195	01	Ainno_16251	Ainnocence	AIN1-12_AINNL0012	Lot# MB15NO2405	TC00820839	A009	41.4	ng/ml	44300	96.64							20220127_SR2DTOX_Ab
AB01974195	01	Ainno_16251	Ainnocence	AIN1-12_AINNL0012	Lot# MB15NO2405	TC00820839	A010	13.1	ng/ml	45545	99.35							20220127_SR2DTOX_Ab
AB01974195	01	Ainno_16251	Ainnocence	AIN1-12_AINNL0012	Lot# MB15NO2405	TC00820839	A011	4.146	ng/ml	46740	101.96							20220127_SR2DTOX_Ab
AB01974195	01	Ainno_16251	Ainnocence	AIN1-12_AINNL0012	Lot# MB15NO2405	TC00820839	A012	1.312	ng/ml	49325	107.61							20220127_SR2DTOX_Ab
AB01974195	01	Ainno_16251	Ainnocence	AIN1-12_AINNL0012	Lot# MB15NO2405	TC00820839	A013	0.4152	ng/ml	46470	101.37							20220127_SR2DTOX_Ab
AB01974195	01	Ainno_16251	Ainnocence	AIN1-12_AINNL0012	Lot# MB15NO2405	TC00820839	A014	0.1314	ng/ml	47880	104.45							20220127_SR2DTOX_Ab
AB01974195	01	Ainno_16251	Ainnocence	AIN1-12_AINNL0012	Lot# MB15NO2405	TC00820839	A015	0.04158	ng/ml	46070	100.5							20220127_SR2DTOX_Ab
AB01974195	01	Ainno_16251	Ainnocence	AIN1-12_AINNL0012	Lot# MB15NO2405	TC00820839	A016	0.01316	ng/ml	47440	103.49							20220127_SR2DTOX_Ab
AB01974195	01	Ainno_16251	Ainnocence	AIN1-12_AINNL0012	Lot# MB15NO2405	TC00820839	A017	0.004164	ng/ml	45470	99.19							20220127_SR2DTOX_Ab
AB01974195	01	Ainno_16251	Ainnocence	AIN1-12_AINNL0012	Lot# MB15NO2405	TC00820839	A018	0.001318	ng/ml	44785	97.69							20220127_SR2DTOX_Ab
AB01974195	01	Ainno_16251	Ainnocence	AIN1-12_AINNL0012	Lot# MB15NO2405	TC00820839	A019	0.000417	ng/ml	44520	97.12							20220127_SR2DTOX_Ab
AB01974195	01	Ainno_16251	Ainnocence	AIN1-12_AINNL0012	Lot# MB15NO2405	TC00820839	A020	0.000132	ng/ml	45440	99.13							20220127_SR2DTOX_Ab
AB01974195	01	Ainno_16251	Ainnocence	AIN1-12_AINNL0012	Lot# MB15NO2405	TC00820839	A021	4.176e-05	ng/ml	44075	96.14							20220127_SR2DTOX_Ab
AB01974195	01	Ainno_16251	Ainnocence	AIN1-12_AINNL0012	Lot# MB15NO2405	TC00820839	A022	1.321e-05	ng/ml	44155	96.32							20220127_SR2DTOX_Ab
AB01974196	01	Ainno_16251	Ainnocence	AIN1-20_AINNL0020	Lot# MB15NO2406	TC00820839	B003	45220	ng/ml	49490	107.97	>45220	Inactive	0.55			20	20220127_SR2DTOX_Ab
AB01974196	01	Ainno_16251	Ainnocence	AIN1-20_AINNL0020	Lot# MB15NO2406	TC00820839	B004	14310	ng/ml	47905	104.51							20220127_SR2DTOX_Ab
AB01974196	01	Ainno_16251	Ainnocence	AIN1-20_AINNL0020	Lot# MB15NO2406	TC00820839	B005	4529	ng/ml	48350	105.48							20220127_SR2DTOX_Ab
AB01974196	01	Ainno_16251	Ainnocence	AIN1-20_AINNL0020	Lot# MB15NO2406	TC00820839	B006	1433	ng/ml	50275	109.68							20220127_SR2DTOX_Ab
AB01974196	01	Ainno_16251	Ainnocence	AIN1-20_AINNL0020	Lot# MB15NO2406	TC00820839	B007	453.5	ng/ml	50025	109.14							20220127_SR2DTOX_Ab
AB01974196	01	Ainno_16251	Ainnocence	AIN1-20_AINNL0020	Lot# MB15NO2406	TC00820839	B008	143.5	ng/ml	50020	109.13							20220127_SR2DTOX_Ab
AB01974196	01	Ainno_16251	Ainnocence	AIN1-20_AINNL0020	Lot# MB15NO2406	TC00820839	B009	45.42	ng/ml	51805	113.03							20220127_SR2DTOX_Ab
AB01974196	01	Ainno_16251	Ainnocence	AIN1-20_AINNL0020	Lot# MB15NO2406	TC00820839	B010	14.37	ng/ml	45485	99.22							20220127_SR2DTOX_Ab
AB01974196	01	Ainno_16251	Ainnocence	AIN1-20_AINNL0020	Lot# MB15NO2406	TC00820839	B011	4.548	ng/ml	46955	102.43							20220127_SR2DTOX_Ab
AB01974196	01	Ainno_16251	Ainnocence	AIN1-20_AINNL0020	Lot# MB15NO2406	TC00820839	B012	1.439	ng/ml	47565	103.77							20220127_SR2DTOX_Ab
AB01974196	01	Ainno_16251	Ainnocence	AIN1-20_AINNL0020	Lot# MB15NO2406	TC00820839	B013	0.4555	ng/ml	46400	101.22							20220127_SR2DTOX_Ab
AB01974196	01	Ainno_16251	Ainnocence	AIN1-20_AINNL0020	Lot# MB15NO2406	TC00820839	B014	0.1441	ng/ml	46000	100.35							20220127_SR2DTOX_Ab
AB01974196	01	Ainno_16251	Ainnocence	AIN1-20_AINNL0020	Lot# MB15NO2406	TC00820839	B015	0.04561	ng/ml	47060	102.66							20220127_SR2DTOX_Ab
AB01974196	01	Ainno_16251	Ainnocence	AIN1-20_AINNL0020	Lot# MB15NO2406	TC00820839	B016	0.01443	ng/ml	47395	103.4							20220127_SR2DTOX_Ab
AB01974196	01	Ainno_16251	Ainnocence	AIN1-20_AINNL0020	Lot# MB15NO2406	TC00820839	B017	0.004568	ng/ml	48825	106.52							20220127_SR2DTOX_Ab
AB01974196	01	Ainno_16251	Ainnocence	AIN1-20_AINNL0020	Lot# MB15NO2406	TC00820839	B018	0.001446	ng/ml	44345	96.73							20220127_SR2DTOX_Ab
AB01974196	01	Ainno_16251	Ainnocence	AIN1-20_AINNL0020	Lot# MB15NO2406	TC00820839	B019	0.0004574	ng/ml	45945	100.23							20220127_SR2DTOX_Ab
AB01974196	01	Ainno_16251	Ainnocence	AIN1-20_AINNL0020	Lot# MB15NO2406	TC00820839	B020	0.0001448	ng/ml	43370	94.6							20220127_SR2DTOX_Ab
AB01974196	01	Ainno_16251	Ainnocence	AIN1-20_AINNL0020	Lot# MB15NO2406	TC00820839	B021	4.581e-05	ng/ml	45100	98.38							20220127_SR2DTOX_Ab
AB01974196	01	Ainno_16251	Ainnocence	AIN1-20_AINNL0020	Lot# MB15NO2406	TC00820839	B022	1.45e-05	ng/ml	43870	95.7							20220127_SR2DTOX_Ab
AB01974197	01	Ainno_16251	Ainnocence	AIN1-23_AINNL0023	Lot# MB15NO2407	TC00820839	C003	3440	ng/ml	46505	101.45	>3440	Inactive	1.71			20	20220127_SR2DTOX_Ab
AB01974197	01	Ainno_16251	Ainnocence	AIN1-23_AINNL0023	Lot# MB15NO2407	TC00820839	C004	1089	ng/ml	48305	105.38							20220127_SR2DTOX_Ab
AB01974197	01	Ainno_16251	Ainnocence	AIN1-23_AINNL0023	Lot# MB15NO2407	TC00820839	C005	344.5	ng/ml	44275	96.58							20220127_SR2DTOX_Ab
AB01974197	01	Ainno_16251	Ainnocence	AIN1-23_AINNL0023	Lot# MB15NO2407	TC00820839	C006	109	ng/ml	46865	102.24							20220127_SR2DTOX_Ab
AB01974197	01	Ainno_16251	Ainnocence	AIN1-23_AINNL0023	Lot# MB15NO2407	TC00820839	C007	34.5	ng/ml	48365	105.51							20220127_SR2DTOX_Ab
AB01974197	01	Ainno_16251	Ainnocence	AIN1-23_AINNL0023	Lot# MB15NO2407	TC00820839	C008	10.92	ng/ml	49045	107							20220127_SR2DTOX_Ab
AB01974197	01	Ainno_16251	Ainnocence	AIN1-23_AINNL0023	Lot# MB15NO2407	TC00820839	C009	3.455	ng/ml	48740	106.33							20220127_SR2DTOX_Ab
AB01974197	01	Ainno_16251	Ainnocence	AIN1-23_AINNL0023	Lot# MB15NO2407	TC00820839	C010	1.093	ng/ml	46055	100.47							20220127_SR2DTOX_Ab
AB01974197	01	Ainno_16251	Ainnocence	AIN1-23_AINNL0023	Lot# MB15NO2407	TC00820839	C011	0.346	ng/ml	47000	102.53							20220127_SR2DTOX_Ab
AB01974197	01	Ainno_16251	Ainnocence	AIN1-23_AINNL0023	Lot# MB15NO2407	TC00820839	C012	0.1095	ng/ml	48550	105.92							20220127_SR2DTOX_Ab
AB01974197	01	Ainno_16251	Ainnocence	AIN1-23_AINNL0023	Lot# MB15NO2407	TC00820839	C013	0.03465	ng/ml	48420	105.63							20220127_SR2DTOX_Ab
AB01974197	01	Ainno_16251	Ainnocence	AIN1-23_AINNL0023	Lot# MB15NO2407	TC00820839	C014	0.01096	ng/ml	43965	95.9							20220127_SR2DTOX_Ab
AB01974197	01	Ainno_16251	Ainnocence	AIN1-23_AINNL0023	Lot# MB15NO2407	TC00820839	C015	0.00347	ng/ml	45635	99.55							20220127_SR2DTOX_Ab
AB01974197	01	Ainno_16251	Ainnocence	AIN1-23_AINNL0023	Lot# MB15NO2407	TC00820839	C016	0.001098	ng/ml	44045	96.08							20220127_SR2DTOX_Ab
AB01974197	01	Ainno_16251	Ainnocence	AIN1-23_AINNL0023	Lot# MB15NO2407	TC00820839	C017	0.0003475	ng/ml	47190	102.95							20220127_SR2DTOX_Ab
AB01974197	01	Ainno_16251	Ainnocence	AIN1-23_AINNL0023	Lot# MB15NO2407	TC00820839	C018	0.00011	ng/ml	46830	102.16							20220127_SR2DTOX_Ab
AB01974197	01	Ainno_16251	Ainnocence	AIN1-23_AINNL0023	Lot# MB15NO2407	TC00820839	C019	3.48e-05	ng/ml	44495	97.06							20220127_SR2DTOX_Ab
AB01974197	01	Ainno_16251	Ainnocence	AIN1-23_AINNL0023	Lot# MB15NO2407	TC00820839	C020	1.101e-05	ng/ml	48630	106.09							20220127_SR2DTOX_Ab
AB01974197	01	Ainno_16251	Ainnocence	AIN1-23_AINNL0023	Lot# MB15NO2407	TC00820839	C021	3.485e-06	ng/ml	45160	98.51							20220127_SR2DTOX_Ab
AB01974197	01	Ainno_16251	Ainnocence	AIN1-23_AINNL0023	Lot# MB15NO2407	TC00820839	C022	1.103e-06	ng/ml	45660	99.61							20220127_SR2DTOX_Ab
AB01974198	01	Ainno_16251	Ainnocence	AIN1-19_AINNL0019	Lot# MB15NO4119	TC00820839	D003	11670	ng/ml	47400	103.41	>11670	Inactive	0.3			20	20220127_SR2DTOX_Ab
AB01974198	01	Ainno_16251	Ainnocence	AIN1-19_AINNL0019	Lot# MB15NO4119	TC00820839	D004	3693	ng/ml	45930	100.2							20220127_SR2DTOX_Ab
AB01974198	01	Ainno_16251	Ainnocence	AIN1-19_AINNL0019	Lot# MB15NO4119	TC00820839	D005	1169	ng/ml	45275	98.77							20220127_SR2DTOX_Ab
AB01974198	01	Ainno_16251	Ainnocence	AIN1-19_AINNL0019	Lot# MB15NO4119	TC00820839	D006	369.8	ng/ml	46495	101.43							20220127_SR2DTOX_Ab
AB01974198	01	Ainno_16251	Ainnocence	AIN1-19_AINNL0019	Lot# MB15NO4119	TC00820839	D007	117	ng/ml	48020	104.76							20220127_SR2DTOX_Ab
AB01974198	01	Ainno_16251	Ainnocence	AIN1-19_AINNL0019	Lot# MB15NO4119	TC00820839	D008	37.04	ng/ml	48175	105.1							20220127_SR2DTOX_Ab
AB01974198	01	Ainno_16251	Ainnocence	AIN1-19_AINNL0019	Lot# MB15NO4119	TC00820839	D009	11.72	ng/ml	49340	107.64							20220127_SR2DTOX_Ab
AB01974198	01	Ainno_16251	Ainnocence	AIN1-19_AINNL0019	Lot# MB15NO4119	TC00820839	D010	3.709	ng/ml	45720	99.74							20220127_SR2DTOX_Ab
AB01974198	01	Ainno_16251	Ainnocence	AIN1-19_AINNL0019	Lot# MB15NO4119	TC00820839	D011	1.174	ng/ml	48815	106.5							20220127_SR2DTOX_Ab
AB01974198	01	Ainno_16251	Ainnocence	AIN1-19_AINNL0019	Lot# MB15NO4119	TC00820839	D012	0.3714	ng/ml	44795	97.72							20220127_SR2DTOX_Ab
AB01974198	01	Ainno_16251	Ainnocence	AIN1-19_AINNL0019	Lot# MB15NO4119	TC00820839	D013	0.1175	ng/ml	46430	101.29							20220127_SR2DTOX_Ab
AB01974198	01	Ainno_16251	Ainnocence	AIN1-19_AINNL0019	Lot# MB15NO4119	TC00820839	D014	0.0372	ng/ml	45000	98.16							20220127_SR2DTOX_Ab
AB01974198	01	Ainno_16251	Ainnocence	AIN1-19_AINNL0019	Lot# MB15NO4119	TC00820839	D015	0.01177	ng/ml	46030	100.41							20220127_SR2DTOX_Ab
AB01974198	01	Ainno_16251	Ainnocence	AIN1-19_AINNL0019	Lot# MB15NO4119	TC00820839	D016	0.003725	ng/ml	44805	97.74							20220127_SR2DTOX_Ab
AB01974198	01	Ainno_16251	Ainnocence	AIN1-19_AINNL0019	Lot# MB15NO4119	TC00820839	D017	0.001179	ng/ml	44495	97.06							20220127_SR2DTOX_Ab
AB01974198	01	Ainno_16251	Ainnocence	AIN1-19_AINNL0019	Lot# MB15NO4119	TC00820839	D018	0.000373	ng/ml	43610	95.13							20220127_SR2DTOX_Ab
AB01974198	01	Ainno_16251	Ainnocence	AIN1-19_AINNL0019	Lot# MB15NO4119	TC00820839	D019	0.0001181	ng/ml	45020	98.21							20220127_SR2DTOX_Ab
AB01974198	01	Ainno_16251	Ainnocence	AIN1-19_AINNL0019	Lot# MB15NO4119	TC00820839	D020	3.736e-05	ng/ml	46195	100.77							20220127_SR2DTOX_Ab
AB01974198	01	Ainno_16251	Ainnocence	AIN1-19_AINNL0019	Lot# MB15NO4119	TC00820839	D021	1.182e-05	ng/ml	45840	100							20220127_SR2DTOX_Ab
AB01974198	01	Ainno_16251	Ainnocence	AIN1-19_AINNL0019	Lot# MB15NO4119	TC00820839	D022	3.741e-06	ng/ml	43365	94.59							20220127_SR2DTOX_Ab
AB01974199	01	Ainno_16251	Ainnocence	AIN1-24_AINNL0024	Lot# MB15NO4124	TC00820839	E003	12110	ng/ml	44770	97.66	>12110	Inactive	0.11			20	20220127_SR2DTOX_Ab
AB01974199	01	Ainno_16251	Ainnocence	AIN1-24_AINNL0024	Lot# MB15NO4124	TC00820839	E004	3832	ng/ml	43920	95.81							20220127_SR2DTOX_Ab
AB01974199	01	Ainno_16251	Ainnocence	AIN1-24_AINNL0024	Lot# MB15NO4124	TC00820839	E005	1213	ng/ml	43600	95.11							20220127_SR2DTOX_Ab
AB01974199	01	Ainno_16251	Ainnocence	AIN1-24_AINNL0024	Lot# MB15NO4124	TC00820839	E006	383.8	ng/ml	44315	96.67							20220127_SR2DTOX_Ab
AB01974199	01	Ainno_16251	Ainnocence	AIN1-24_AINNL0024	Lot# MB15NO4124	TC00820839	E007	121.4	ng/ml	45295	98.81							20220127_SR2DTOX_Ab
AB01974199	01	Ainno_16251	Ainnocence	AIN1-24_AINNL0024	Lot# MB15NO4124	TC00820839	E008	38.43	ng/ml	44425	96.91							20220127_SR2DTOX_Ab
AB01974199	01	Ainno_16251	Ainnocence	AIN1-24_AINNL0024	Lot# MB15NO4124	TC00820839	E009	12.16	ng/ml	44200	96.42							20220127_SR2DTOX_Ab
AB01974199	01	Ainno_16251	Ainnocence	AIN1-24_AINNL0024	Lot# MB15NO4124	TC00820839	E010	3.849	ng/ml	47070	102.69							20220127_SR2DTOX_Ab
AB01974199	01	Ainno_16251	Ainnocence	AIN1-24_AINNL0024	Lot# MB15NO4124	TC00820839	E011	1.218	ng/ml	43350	94.56							20220127_SR2DTOX_Ab
AB01974199	01	Ainno_16251	Ainnocence	AIN1-24_AINNL0024	Lot# MB15NO4124	TC00820839	E012	0.3854	ng/ml	43545	94.99							20220127_SR2DTOX_Ab
AB01974199	01	Ainno_16251	Ainnocence	AIN1-24_AINNL0024	Lot# MB15NO4124	TC00820839	E013	0.122	ng/ml	45285	98.79							20220127_SR2DTOX_Ab
AB01974199	01	Ainno_16251	Ainnocence	AIN1-24_AINNL0024	Lot# MB15NO4124	TC00820839	E014	0.0386	ng/ml	43490	94.87							20220127_SR2DTOX_Ab
AB01974199	01	Ainno_16251	Ainnocence	AIN1-24_AINNL0024	Lot# MB15NO4124	TC00820839	E015	0.01222	ng/ml	43780	95.5							20220127_SR2DTOX_Ab
AB01974199	01	Ainno_16251	Ainnocence	AIN1-24_AINNL0024	Lot# MB15NO4124	TC00820839	E016	0.003866	ng/ml	44730	97.57							20220127_SR2DTOX_Ab
AB01974199	01	Ainno_16251	Ainnocence	AIN1-24_AINNL0024	Lot# MB15NO4124	TC00820839	E017	0.001223	ng/ml	43555	95.01							20220127_SR2DTOX_Ab
AB01974199	01	Ainno_16251	Ainnocence	AIN1-24_AINNL0024	Lot# MB15NO4124	TC00820839	E018	0.0003871	ng/ml	43645	95.21							20220127_SR2DTOX_Ab
AB01974199	01	Ainno_16251	Ainnocence	AIN1-24_AINNL0024	Lot# MB15NO4124	TC00820839	E019	0.0001225	ng/ml	46025	100.4							20220127_SR2DTOX_Ab
AB01974199	01	Ainno_16251	Ainnocence	AIN1-24_AINNL0024	Lot# MB15NO4124	TC00820839	E020	3.877e-05	ng/ml	45130	98.45							20220127_SR2DTOX_Ab
AB01974199	01	Ainno_16251	Ainnocence	AIN1-24_AINNL0024	Lot# MB15NO4124	TC00820839	E021	1.227e-05	ng/ml	41590	90.72							20220127_SR2DTOX_Ab
AB01974199	01	Ainno_16251	Ainnocence	AIN1-24_AINNL0024	Lot# MB15NO4124	TC00820839	E022	3.882e-06	ng/ml	42405	92.5							20220127_SR2DTOX_Ab
AB01974200	01	Ainno_16251	Ainnocence	AIN1-25_AINNL0025	Lot# MB15NO4125	TC00820839	F003	7670	ng/ml	44875	97.89	>7670	Inactive	18.63			20	20220127_SR2DTOX_Ab
AB01974200	01	Ainno_16251	Ainnocence	AIN1-25_AINNL0025	Lot# MB15NO4125	TC00820839	F004	2427	ng/ml	44595	97.28							20220127_SR2DTOX_Ab
AB01974200	01	Ainno_16251	Ainnocence	AIN1-25_AINNL0025	Lot# MB15NO4125	TC00820839	F005	768.1	ng/ml	43880	95.72							20220127_SR2DTOX_Ab
AB01974200	01	Ainno_16251	Ainnocence	AIN1-25_AINNL0025	Lot# MB15NO4125	TC00820839	F006	243.1	ng/ml	44635	97.37							20220127_SR2DTOX_Ab
AB01974200	01	Ainno_16251	Ainnocence	AIN1-25_AINNL0025	Lot# MB15NO4125	TC00820839	F007	76.92	ng/ml	44820	97.77							20220127_SR2DTOX_Ab
AB01974200	01	Ainno_16251	Ainnocence	AIN1-25_AINNL0025	Lot# MB15NO4125	TC00820839	F008	24.34	ng/ml	44530	97.14							20220127_SR2DTOX_Ab
AB01974200	01	Ainno_16251	Ainnocence	AIN1-25_AINNL0025	Lot# MB15NO4125	TC00820839	F009	7.703	ng/ml	45505	99.27							20220127_SR2DTOX_Ab
AB01974200	01	Ainno_16251	Ainnocence	AIN1-25_AINNL0025	Lot# MB15NO4125	TC00820839	F010	2.438	ng/ml	45415	99.07							20220127_SR2DTOX_Ab
AB01974200	01	Ainno_16251	Ainnocence	AIN1-25_AINNL0025	Lot# MB15NO4125	TC00820839	F011	0.7714	ng/ml	44610	97.31							20220127_SR2DTOX_Ab
AB01974200	01	Ainno_16251	Ainnocence	AIN1-25_AINNL0025	Lot# MB15NO4125	TC00820839	F012	0.2441	ng/ml	45235	98.68							20220127_SR2DTOX_Ab
AB01974200	01	Ainno_16251	Ainnocence	AIN1-25_AINNL0025	Lot# MB15NO4125	TC00820839	F013	0.07725	ng/ml	45795	99.9							20220127_SR2DTOX_Ab
AB01974200	01	Ainno_16251	Ainnocence	AIN1-25_AINNL0025	Lot# MB15NO4125	TC00820839	F014	0.02445	ng/ml	46390	101.2							20220127_SR2DTOX_Ab
AB01974200	01	Ainno_16251	Ainnocence	AIN1-25_AINNL0025	Lot# MB15NO4125	TC00820839	F015	0.007737	ng/ml	43640	95.19							20220127_SR2DTOX_Ab
AB01974200	01	Ainno_16251	Ainnocence	AIN1-25_AINNL0025	Lot# MB15NO4125	TC00820839	F016	0.002448	ng/ml	43910	95.78							20220127_SR2DTOX_Ab
AB01974200	01	Ainno_16251	Ainnocence	AIN1-25_AINNL0025	Lot# MB15NO4125	TC00820839	F017	0.0007748	ng/ml	46050	100.46							20220127_SR2DTOX_Ab
AB01974200	01	Ainno_16251	Ainnocence	AIN1-25_AINNL0025	Lot# MB15NO4125	TC00820839	F018	0.0002452	ng/ml	44745	97.61							20220127_SR2DTOX_Ab
AB01974200	01	Ainno_16251	Ainnocence	AIN1-25_AINNL0025	Lot# MB15NO4125	TC00820839	F019	7.759e-05	ng/ml	44655	97.41							20220127_SR2DTOX_Ab
AB01974200	01	Ainno_16251	Ainnocence	AIN1-25_AINNL0025	Lot# MB15NO4125	TC00820839	F020	2.455e-05	ng/ml	49190	107.32							20220127_SR2DTOX_Ab
AB01974200	01	Ainno_16251	Ainnocence	AIN1-25_AINNL0025	Lot# MB15NO4125	TC00820839	F021	7.77e-06	ng/ml	45420	99.08							20220127_SR2DTOX_Ab
AB01974200	01	Ainno_16251	Ainnocence	AIN1-25_AINNL0025	Lot# MB15NO4125	TC00820839	F022	2.459e-06	ng/ml	46385	101.19							20220127_SR2DTOX_Ab
AB01974201	01	Ainno_16251	Ainnocence	AIN1-27_AINNL0027	Lot# MB15NO1901	TC00820839	G003	1440	ng/ml	46955	102.43	>1440	Inactive	0.1			20	20220127_SR2DTOX_Ab
AB01974201	01	Ainno_16251	Ainnocence	AIN1-27_AINNL0027	Lot# MB15NO1901	TC00820839	G004	455.7	ng/ml	44160	96.33							20220127_SR2DTOX_Ab
AB01974201	01	Ainno_16251	Ainnocence	AIN1-27_AINNL0027	Lot# MB15NO1901	TC00820839	G005	144.2	ng/ml	45435	99.11							20220127_SR2DTOX_Ab
AB01974201	01	Ainno_16251	Ainnocence	AIN1-27_AINNL0027	Lot# MB15NO1901	TC00820839	G006	45.64	ng/ml	41775	91.12							20220127_SR2DTOX_Ab
AB01974201	01	Ainno_16251	Ainnocence	AIN1-27_AINNL0027	Lot# MB15NO1901	TC00820839	G007	14.44	ng/ml	43945	95.86							20220127_SR2DTOX_Ab
AB01974201	01	Ainno_16251	Ainnocence	AIN1-27_AINNL0027	Lot# MB15NO1901	TC00820839	G008	4.57	ng/ml	45490	99.23							20220127_SR2DTOX_Ab
AB01974201	01	Ainno_16251	Ainnocence	AIN1-27_AINNL0027	Lot# MB15NO1901	TC00820839	G009	1.446	ng/ml	44245	96.52							20220127_SR2DTOX_Ab
AB01974201	01	Ainno_16251	Ainnocence	AIN1-27_AINNL0027	Lot# MB15NO1901	TC00820839	G010	0.4577	ng/ml	45040	98.25							20220127_SR2DTOX_Ab
AB01974201	01	Ainno_16251	Ainnocence	AIN1-27_AINNL0027	Lot# MB15NO1901	TC00820839	G011	0.1448	ng/ml	41985	91.58							20220127_SR2DTOX_Ab
AB01974201	01	Ainno_16251	Ainnocence	AIN1-27_AINNL0027	Lot# MB15NO1901	TC00820839	G012	0.04583	ng/ml	45310	98.84							20220127_SR2DTOX_Ab
AB01974201	01	Ainno_16251	Ainnocence	AIN1-27_AINNL0027	Lot# MB15NO1901	TC00820839	G013	0.0145	ng/ml	44200	96.42							20220127_SR2DTOX_Ab
AB01974201	01	Ainno_16251	Ainnocence	AIN1-27_AINNL0027	Lot# MB15NO1901	TC00820839	G014	0.00459	ng/ml	44075	96.14							20220127_SR2DTOX_Ab
AB01974201	01	Ainno_16251	Ainnocence	AIN1-27_AINNL0027	Lot# MB15NO1901	TC00820839	G015	0.001453	ng/ml	43780	95.5							20220127_SR2DTOX_Ab
AB01974201	01	Ainno_16251	Ainnocence	AIN1-27_AINNL0027	Lot# MB15NO1901	TC00820839	G016	0.0004597	ng/ml	44095	96.19							20220127_SR2DTOX_Ab
AB01974201	01	Ainno_16251	Ainnocence	AIN1-27_AINNL0027	Lot# MB15NO1901	TC00820839	G017	0.0001455	ng/ml	44255	96.54							20220127_SR2DTOX_Ab
AB01974201	01	Ainno_16251	Ainnocence	AIN1-27_AINNL0027	Lot# MB15NO1901	TC00820839	G018	4.603e-05	ng/ml	44150	96.31							20220127_SR2DTOX_Ab
AB01974201	01	Ainno_16251	Ainnocence	AIN1-27_AINNL0027	Lot# MB15NO1901	TC00820839	G019	1.457e-05	ng/ml	42595	92.91							20220127_SR2DTOX_Ab
AB01974201	01	Ainno_16251	Ainnocence	AIN1-27_AINNL0027	Lot# MB15NO1901	TC00820839	G020	4.61e-06	ng/ml	43280	94.41							20220127_SR2DTOX_Ab
AB01974201	01	Ainno_16251	Ainnocence	AIN1-27_AINNL0027	Lot# MB15NO1901	TC00820839	G021	1.459e-06	ng/ml	42500	92.7							20220127_SR2DTOX_Ab
AB01974201	01	Ainno_16251	Ainnocence	AIN1-27_AINNL0027	Lot# MB15NO1901	TC00820839	G022	4.616e-07	ng/ml	42895	93.57							20220127_SR2DTOX_Ab
AB01974202	01	Ainno_16251	Ainnocence	AIN1-34_AINNL0034	Lot# MB15NO1902	TC00820839	H003	2560	ng/ml	43775	95.49	>2560	Inactive	0.09			20	20220127_SR2DTOX_Ab
AB01974202	01	Ainno_16251	Ainnocence	AIN1-34_AINNL0034	Lot# MB15NO1902	TC00820839	H004	810.1	ng/ml	46990	102.51							20220127_SR2DTOX_Ab
AB01974202	01	Ainno_16251	Ainnocence	AIN1-34_AINNL0034	Lot# MB15NO1902	TC00820839	H005	256.4	ng/ml	46135	100.64							20220127_SR2DTOX_Ab
AB01974202	01	Ainno_16251	Ainnocence	AIN1-34_AINNL0034	Lot# MB15NO1902	TC00820839	H006	81.13	ng/ml	44140	96.29							20220127_SR2DTOX_Ab
AB01974202	01	Ainno_16251	Ainnocence	AIN1-34_AINNL0034	Lot# MB15NO1902	TC00820839	H007	25.67	ng/ml	43410	94.69							20220127_SR2DTOX_Ab
AB01974202	01	Ainno_16251	Ainnocence	AIN1-34_AINNL0034	Lot# MB15NO1902	TC00820839	H008	8.125	ng/ml	43750	95.43							20220127_SR2DTOX_Ab
AB01974202	01	Ainno_16251	Ainnocence	AIN1-34_AINNL0034	Lot# MB15NO1902	TC00820839	H009	2.571	ng/ml	45080	98.34							20220127_SR2DTOX_Ab
AB01974202	01	Ainno_16251	Ainnocence	AIN1-34_AINNL0034	Lot# MB15NO1902	TC00820839	H010	0.8136	ng/ml	44965	98.09							20220127_SR2DTOX_Ab
AB01974202	01	Ainno_16251	Ainnocence	AIN1-34_AINNL0034	Lot# MB15NO1902	TC00820839	H011	0.2575	ng/ml	44205	96.43							20220127_SR2DTOX_Ab
AB01974202	01	Ainno_16251	Ainnocence	AIN1-34_AINNL0034	Lot# MB15NO1902	TC00820839	H012	0.08148	ng/ml	45655	99.59							20220127_SR2DTOX_Ab
AB01974202	01	Ainno_16251	Ainnocence	AIN1-34_AINNL0034	Lot# MB15NO1902	TC00820839	H013	0.02579	ng/ml	43755	95.45							20220127_SR2DTOX_Ab
AB01974202	01	Ainno_16251	Ainnocence	AIN1-34_AINNL0034	Lot# MB15NO1902	TC00820839	H014	0.00816	ng/ml	46415	101.25							20220127_SR2DTOX_Ab
AB01974202	01	Ainno_16251	Ainnocence	AIN1-34_AINNL0034	Lot# MB15NO1902	TC00820839	H015	0.002582	ng/ml	44180	96.37							20220127_SR2DTOX_Ab
AB01974202	01	Ainno_16251	Ainnocence	AIN1-34_AINNL0034	Lot# MB15NO1902	TC00820839	H016	0.0008172	ng/ml	42115	91.86							20220127_SR2DTOX_Ab
AB01974202	01	Ainno_16251	Ainnocence	AIN1-34_AINNL0034	Lot# MB15NO1902	TC00820839	H017	0.0002586	ng/ml	44235	96.49							20220127_SR2DTOX_Ab
AB01974202	01	Ainno_16251	Ainnocence	AIN1-34_AINNL0034	Lot# MB15NO1902	TC00820839	H018	8.183e-05	ng/ml	44820	97.77							20220127_SR2DTOX_Ab
AB01974202	01	Ainno_16251	Ainnocence	AIN1-34_AINNL0034	Lot# MB15NO1902	TC00820839	H019	2.59e-05	ng/ml	44285	96.6							20220127_SR2DTOX_Ab
AB01974202	01	Ainno_16251	Ainnocence	AIN1-34_AINNL0034	Lot# MB15NO1902	TC00820839	H020	8.195e-06	ng/ml	44980	98.12							20220127_SR2DTOX_Ab
AB01974202	01	Ainno_16251	Ainnocence	AIN1-34_AINNL0034	Lot# MB15NO1902	TC00820839	H021	2.593e-06	ng/ml	44670	97.44							20220127_SR2DTOX_Ab
AB01974202	01	Ainno_16251	Ainnocence	AIN1-34_AINNL0034	Lot# MB15NO1902	TC00820839	H022	8.207e-07	ng/ml	41165	89.79							20220127_SR2DTOX_Ab
AB01974203	01	Ainno_16251	Ainnocence	AIN1-35_AINNL0035	Lot# MB15NO1903	TC00820839	I003	2330	ng/ml	44115	96.23	>2330	Inactive	0.16			20	20220127_SR2DTOX_Ab
AB01974203	01	Ainno_16251	Ainnocence	AIN1-35_AINNL0035	Lot# MB15NO1903	TC00820839	I004	737.3	ng/ml	46120	100.61							20220127_SR2DTOX_Ab
AB01974203	01	Ainno_16251	Ainnocence	AIN1-35_AINNL0035	Lot# MB15NO1903	TC00820839	I005	233.3	ng/ml	44430	96.92							20220127_SR2DTOX_Ab
AB01974203	01	Ainno_16251	Ainnocence	AIN1-35_AINNL0035	Lot# MB15NO1903	TC00820839	I006	73.84	ng/ml	46755	102							20220127_SR2DTOX_Ab
AB01974203	01	Ainno_16251	Ainnocence	AIN1-35_AINNL0035	Lot# MB15NO1903	TC00820839	I007	23.37	ng/ml	43880	95.72							20220127_SR2DTOX_Ab
AB01974203	01	Ainno_16251	Ainnocence	AIN1-35_AINNL0035	Lot# MB15NO1903	TC00820839	I008	7.395	ng/ml	44615	97.32							20220127_SR2DTOX_Ab
AB01974203	01	Ainno_16251	Ainnocence	AIN1-35_AINNL0035	Lot# MB15NO1903	TC00820839	I009	2.34	ng/ml	45725	99.75							20220127_SR2DTOX_Ab
AB01974203	01	Ainno_16251	Ainnocence	AIN1-35_AINNL0035	Lot# MB15NO1903	TC00820839	I010	0.7405	ng/ml	43650	95.22							20220127_SR2DTOX_Ab
AB01974203	01	Ainno_16251	Ainnocence	AIN1-35_AINNL0035	Lot# MB15NO1903	TC00820839	I011	0.2343	ng/ml	46425	101.28							20220127_SR2DTOX_Ab
AB01974203	01	Ainno_16251	Ainnocence	AIN1-35_AINNL0035	Lot# MB15NO1903	TC00820839	I012	0.07416	ng/ml	44620	97.33							20220127_SR2DTOX_Ab
AB01974203	01	Ainno_16251	Ainnocence	AIN1-35_AINNL0035	Lot# MB15NO1903	TC00820839	I013	0.02347	ng/ml	43630	95.17							20220127_SR2DTOX_Ab
AB01974203	01	Ainno_16251	Ainnocence	AIN1-35_AINNL0035	Lot# MB15NO1903	TC00820839	I014	0.007427	ng/ml	44570	97.23							20220127_SR2DTOX_Ab
AB01974203	01	Ainno_16251	Ainnocence	AIN1-35_AINNL0035	Lot# MB15NO1903	TC00820839	I015	0.00235	ng/ml	45205	98.61							20220127_SR2DTOX_Ab
AB01974203	01	Ainno_16251	Ainnocence	AIN1-35_AINNL0035	Lot# MB15NO1903	TC00820839	I016	0.0007437	ng/ml	44255	96.54							20220127_SR2DTOX_Ab
AB01974203	01	Ainno_16251	Ainnocence	AIN1-35_AINNL0035	Lot# MB15NO1903	TC00820839	I017	0.0002354	ng/ml	43900	95.76							20220127_SR2DTOX_Ab
AB01974203	01	Ainno_16251	Ainnocence	AIN1-35_AINNL0035	Lot# MB15NO1903	TC00820839	I018	7.448e-05	ng/ml	44360	96.77							20220127_SR2DTOX_Ab
AB01974203	01	Ainno_16251	Ainnocence	AIN1-35_AINNL0035	Lot# MB15NO1903	TC00820839	I019	2.357e-05	ng/ml	45675	99.64							20220127_SR2DTOX_Ab
AB01974203	01	Ainno_16251	Ainnocence	AIN1-35_AINNL0035	Lot# MB15NO1903	TC00820839	I020	7.459e-06	ng/ml	44245	96.52							20220127_SR2DTOX_Ab
AB01974203	01	Ainno_16251	Ainnocence	AIN1-35_AINNL0035	Lot# MB15NO1903	TC00820839	I021	2.36e-06	ng/ml	43760	95.46							20220127_SR2DTOX_Ab
AB01974203	01	Ainno_16251	Ainnocence	AIN1-35_AINNL0035	Lot# MB15NO1903	TC00820839	I022	7.47e-07	ng/ml	43665	95.25							20220127_SR2DTOX_Ab
AB01974204	01	Ainno_16251	Ainnocence	AIN1-37_AINNL0037	Lot# MB15NO1904	TC00820839	J003	2110	ng/ml	47945	104.6	>2110	Inactive	0.22			20	20220127_SR2DTOX_Ab
AB01974204	01	Ainno_16251	Ainnocence	AIN1-37_AINNL0037	Lot# MB15NO1904	TC00820839	J004	667.7	ng/ml	48915	106.71							20220127_SR2DTOX_Ab
AB01974204	01	Ainno_16251	Ainnocence	AIN1-37_AINNL0037	Lot# MB15NO1904	TC00820839	J005	211.3	ng/ml	44930	98.01							20220127_SR2DTOX_Ab
AB01974204	01	Ainno_16251	Ainnocence	AIN1-37_AINNL0037	Lot# MB15NO1904	TC00820839	J006	66.87	ng/ml	44880	97.9							20220127_SR2DTOX_Ab
AB01974204	01	Ainno_16251	Ainnocence	AIN1-37_AINNL0037	Lot# MB15NO1904	TC00820839	J007	21.16	ng/ml	53275	116.24							20220127_SR2DTOX_Ab
AB01974204	01	Ainno_16251	Ainnocence	AIN1-37_AINNL0037	Lot# MB15NO1904	TC00820839	J008	6.696	ng/ml	47775	104.22							20220127_SR2DTOX_Ab
AB01974204	01	Ainno_16251	Ainnocence	AIN1-37_AINNL0037	Lot# MB15NO1904	TC00820839	J009	2.119	ng/ml	45290	98.8							20220127_SR2DTOX_Ab
AB01974204	01	Ainno_16251	Ainnocence	AIN1-37_AINNL0037	Lot# MB15NO1904	TC00820839	J010	0.6706	ng/ml	45750	99.8							20220127_SR2DTOX_Ab
AB01974204	01	Ainno_16251	Ainnocence	AIN1-37_AINNL0037	Lot# MB15NO1904	TC00820839	J011	0.2122	ng/ml	47385	103.37							20220127_SR2DTOX_Ab
AB01974204	01	Ainno_16251	Ainnocence	AIN1-37_AINNL0037	Lot# MB15NO1904	TC00820839	J012	0.06716	ng/ml	46310	101.03							20220127_SR2DTOX_Ab
AB01974204	01	Ainno_16251	Ainnocence	AIN1-37_AINNL0037	Lot# MB15NO1904	TC00820839	J013	0.02125	ng/ml	45575	99.42							20220127_SR2DTOX_Ab
AB01974204	01	Ainno_16251	Ainnocence	AIN1-37_AINNL0037	Lot# MB15NO1904	TC00820839	J014	0.006725	ng/ml	45490	99.23							20220127_SR2DTOX_Ab
AB01974204	01	Ainno_16251	Ainnocence	AIN1-37_AINNL0037	Lot# MB15NO1904	TC00820839	J015	0.002128	ng/ml	42200	92.05							20220127_SR2DTOX_Ab
AB01974204	01	Ainno_16251	Ainnocence	AIN1-37_AINNL0037	Lot# MB15NO1904	TC00820839	J016	0.0006735	ng/ml	42550	92.81							20220127_SR2DTOX_Ab
AB01974204	01	Ainno_16251	Ainnocence	AIN1-37_AINNL0037	Lot# MB15NO1904	TC00820839	J017	0.0002131	ng/ml	43785	95.51							20220127_SR2DTOX_Ab
AB01974204	01	Ainno_16251	Ainnocence	AIN1-37_AINNL0037	Lot# MB15NO1904	TC00820839	J018	6.745e-05	ng/ml	43030	93.86							20220127_SR2DTOX_Ab
AB01974204	01	Ainno_16251	Ainnocence	AIN1-37_AINNL0037	Lot# MB15NO1904	TC00820839	J019	2.134e-05	ng/ml	41475	90.47							20220127_SR2DTOX_Ab
AB01974204	01	Ainno_16251	Ainnocence	AIN1-37_AINNL0037	Lot# MB15NO1904	TC00820839	J020	6.755e-06	ng/ml	44225	96.47							20220127_SR2DTOX_Ab
AB01974204	01	Ainno_16251	Ainnocence	AIN1-37_AINNL0037	Lot# MB15NO1904	TC00820839	J021	2.138e-06	ng/ml	44575	97.24							20220127_SR2DTOX_Ab
AB01974204	01	Ainno_16251	Ainnocence	AIN1-37_AINNL0037	Lot# MB15NO1904	TC00820839	J022	6.764e-07	ng/ml	44820	97.77							20220127_SR2DTOX_Ab
AB01974205	01	Ainno_16251	Ainnocence	AIN1-43_AINNL0043	Lot# MB15NO4143	TC00820839	K003	12330	ng/ml	45405	99.05	>12330	Inactive	0.18			20	20220127_SR2DTOX_Ab
AB01974205	01	Ainno_16251	Ainnocence	AIN1-43_AINNL0043	Lot# MB15NO4143	TC00820839	K004	3902	ng/ml	42360	92.4							20220127_SR2DTOX_Ab
AB01974205	01	Ainno_16251	Ainnocence	AIN1-43_AINNL0043	Lot# MB15NO4143	TC00820839	K005	1235	ng/ml	42665	93.06							20220127_SR2DTOX_Ab
AB01974205	01	Ainno_16251	Ainnocence	AIN1-43_AINNL0043	Lot# MB15NO4143	TC00820839	K006	390.8	ng/ml	46655	101.78							20220127_SR2DTOX_Ab
AB01974205	01	Ainno_16251	Ainnocence	AIN1-43_AINNL0043	Lot# MB15NO4143	TC00820839	K007	123.7	ng/ml	44390	96.83							20220127_SR2DTOX_Ab
AB01974205	01	Ainno_16251	Ainnocence	AIN1-43_AINNL0043	Lot# MB15NO4143	TC00820839	K008	39.13	ng/ml	43330	94.52							20220127_SR2DTOX_Ab
AB01974205	01	Ainno_16251	Ainnocence	AIN1-43_AINNL0043	Lot# MB15NO4143	TC00820839	K009	12.38	ng/ml	43550	95							20220127_SR2DTOX_Ab
AB01974205	01	Ainno_16251	Ainnocence	AIN1-43_AINNL0043	Lot# MB15NO4143	TC00820839	K010	3.919	ng/ml	44135	96.28							20220127_SR2DTOX_Ab
AB01974205	01	Ainno_16251	Ainnocence	AIN1-43_AINNL0043	Lot# MB15NO4143	TC00820839	K011	1.24	ng/ml	45015	98.2							20220127_SR2DTOX_Ab
AB01974205	01	Ainno_16251	Ainnocence	AIN1-43_AINNL0043	Lot# MB15NO4143	TC00820839	K012	0.3924	ng/ml	43740	95.41							20220127_SR2DTOX_Ab
AB01974205	01	Ainno_16251	Ainnocence	AIN1-43_AINNL0043	Lot# MB15NO4143	TC00820839	K013	0.1242	ng/ml	44395	96.84							20220127_SR2DTOX_Ab
AB01974205	01	Ainno_16251	Ainnocence	AIN1-43_AINNL0043	Lot# MB15NO4143	TC00820839	K014	0.0393	ng/ml	42430	92.55							20220127_SR2DTOX_Ab
AB01974205	01	Ainno_16251	Ainnocence	AIN1-43_AINNL0043	Lot# MB15NO4143	TC00820839	K015	0.01244	ng/ml	42970	93.73							20220127_SR2DTOX_Ab
AB01974205	01	Ainno_16251	Ainnocence	AIN1-43_AINNL0043	Lot# MB15NO4143	TC00820839	K016	0.003936	ng/ml	42880	93.53							20220127_SR2DTOX_Ab
AB01974205	01	Ainno_16251	Ainnocence	AIN1-43_AINNL0043	Lot# MB15NO4143	TC00820839	K017	0.001246	ng/ml	44975	98.11							20220127_SR2DTOX_Ab
AB01974205	01	Ainno_16251	Ainnocence	AIN1-43_AINNL0043	Lot# MB15NO4143	TC00820839	K018	0.0003941	ng/ml	43335	94.53							20220127_SR2DTOX_Ab
AB01974205	01	Ainno_16251	Ainnocence	AIN1-43_AINNL0043	Lot# MB15NO4143	TC00820839	K019	0.0001247	ng/ml	43285	94.42							20220127_SR2DTOX_Ab
AB01974205	01	Ainno_16251	Ainnocence	AIN1-43_AINNL0043	Lot# MB15NO4143	TC00820839	K020	3.947e-05	ng/ml	42135	91.91							20220127_SR2DTOX_Ab
AB01974205	01	Ainno_16251	Ainnocence	AIN1-43_AINNL0043	Lot# MB15NO4143	TC00820839	K021	1.249e-05	ng/ml	42815	93.39							20220127_SR2DTOX_Ab
AB01974205	01	Ainno_16251	Ainnocence	AIN1-43_AINNL0043	Lot# MB15NO4143	TC00820839	K022	3.953e-06	ng/ml	41990	91.59							20220127_SR2DTOX_Ab
AB01974206	01	Ainno_16251	Ainnocence	AIN1-44_AINNL0044	Lot# MB15NO4144	TC00820839	L003	11440	ng/ml	46765	102.02	>11440	Inactive	0.1			20	20220127_SR2DTOX_Ab
AB01974206	01	Ainno_16251	Ainnocence	AIN1-44_AINNL0044	Lot# MB15NO4144	TC00820839	L004	3620	ng/ml	45565	99.4							20220127_SR2DTOX_Ab
AB01974206	01	Ainno_16251	Ainnocence	AIN1-44_AINNL0044	Lot# MB15NO4144	TC00820839	L005	1146	ng/ml	43825	95.6							20220127_SR2DTOX_Ab
AB01974206	01	Ainno_16251	Ainnocence	AIN1-44_AINNL0044	Lot# MB15NO4144	TC00820839	L006	362.5	ng/ml	44225	96.47							20220127_SR2DTOX_Ab
AB01974206	01	Ainno_16251	Ainnocence	AIN1-44_AINNL0044	Lot# MB15NO4144	TC00820839	L007	114.7	ng/ml	45280	98.78							20220127_SR2DTOX_Ab
AB01974206	01	Ainno_16251	Ainnocence	AIN1-44_AINNL0044	Lot# MB15NO4144	TC00820839	L008	36.31	ng/ml	45585	99.44							20220127_SR2DTOX_Ab
AB01974206	01	Ainno_16251	Ainnocence	AIN1-44_AINNL0044	Lot# MB15NO4144	TC00820839	L009	11.49	ng/ml	43685	95.29							20220127_SR2DTOX_Ab
AB01974206	01	Ainno_16251	Ainnocence	AIN1-44_AINNL0044	Lot# MB15NO4144	TC00820839	L010	3.636	ng/ml	42585	92.89							20220127_SR2DTOX_Ab
AB01974206	01	Ainno_16251	Ainnocence	AIN1-44_AINNL0044	Lot# MB15NO4144	TC00820839	L011	1.151	ng/ml	44625	97.35							20220127_SR2DTOX_Ab
AB01974206	01	Ainno_16251	Ainnocence	AIN1-44_AINNL0044	Lot# MB15NO4144	TC00820839	L012	0.3641	ng/ml	44665	97.43							20220127_SR2DTOX_Ab
AB01974206	01	Ainno_16251	Ainnocence	AIN1-44_AINNL0044	Lot# MB15NO4144	TC00820839	L013	0.1152	ng/ml	43165	94.16							20220127_SR2DTOX_Ab
AB01974206	01	Ainno_16251	Ainnocence	AIN1-44_AINNL0044	Lot# MB15NO4144	TC00820839	L014	0.03646	ng/ml	42420	92.53							20220127_SR2DTOX_Ab
AB01974206	01	Ainno_16251	Ainnocence	AIN1-44_AINNL0044	Lot# MB15NO4144	TC00820839	L015	0.01154	ng/ml	44440	96.94							20220127_SR2DTOX_Ab
AB01974206	01	Ainno_16251	Ainnocence	AIN1-44_AINNL0044	Lot# MB15NO4144	TC00820839	L016	0.003652	ng/ml	44970	98.1							20220127_SR2DTOX_Ab
AB01974206	01	Ainno_16251	Ainnocence	AIN1-44_AINNL0044	Lot# MB15NO4144	TC00820839	L017	0.001156	ng/ml	42800	93.36							20220127_SR2DTOX_Ab
AB01974206	01	Ainno_16251	Ainnocence	AIN1-44_AINNL0044	Lot# MB15NO4144	TC00820839	L018	0.0003657	ng/ml	43050	93.91							20220127_SR2DTOX_Ab
AB01974206	01	Ainno_16251	Ainnocence	AIN1-44_AINNL0044	Lot# MB15NO4144	TC00820839	L019	0.0001157	ng/ml	42955	93.7							20220127_SR2DTOX_Ab
AB01974206	01	Ainno_16251	Ainnocence	AIN1-44_AINNL0044	Lot# MB15NO4144	TC00820839	L020	3.662e-05	ng/ml	42260	92.18							20220127_SR2DTOX_Ab
AB01974206	01	Ainno_16251	Ainnocence	AIN1-44_AINNL0044	Lot# MB15NO4144	TC00820839	L021	1.159e-05	ng/ml	42265	92.19							20220127_SR2DTOX_Ab
AB01974206	01	Ainno_16251	Ainnocence	AIN1-44_AINNL0044	Lot# MB15NO4144	TC00820839	L022	3.668e-06	ng/ml	42575	92.87							20220127_SR2DTOX_Ab
AB01974207	01	Ainno_16251	Ainnocence	AIN1-45_AINNL0045	Lot# MB15NO4145	TC00820839	M003	11440	ng/ml	45475	99.2	>11440	Inactive	0.13			20	20220127_SR2DTOX_Ab
AB01974207	01	Ainno_16251	Ainnocence	AIN1-45_AINNL0045	Lot# MB15NO4145	TC00820839	M004	3620	ng/ml	47090	102.73							20220127_SR2DTOX_Ab
AB01974207	01	Ainno_16251	Ainnocence	AIN1-45_AINNL0045	Lot# MB15NO4145	TC00820839	M005	1146	ng/ml	43405	94.68							20220127_SR2DTOX_Ab
AB01974207	01	Ainno_16251	Ainnocence	AIN1-45_AINNL0045	Lot# MB15NO4145	TC00820839	M006	362.5	ng/ml	45830	99.98							20220127_SR2DTOX_Ab
AB01974207	01	Ainno_16251	Ainnocence	AIN1-45_AINNL0045	Lot# MB15NO4145	TC00820839	M007	114.7	ng/ml	45065	98.31							20220127_SR2DTOX_Ab
AB01974207	01	Ainno_16251	Ainnocence	AIN1-45_AINNL0045	Lot# MB15NO4145	TC00820839	M008	36.31	ng/ml	43725	95.38							20220127_SR2DTOX_Ab
AB01974207	01	Ainno_16251	Ainnocence	AIN1-45_AINNL0045	Lot# MB15NO4145	TC00820839	M009	11.49	ng/ml	46090	100.54							20220127_SR2DTOX_Ab
AB01974207	01	Ainno_16251	Ainnocence	AIN1-45_AINNL0045	Lot# MB15NO4145	TC00820839	M010	3.636	ng/ml	43695	95.31							20220127_SR2DTOX_Ab
AB01974207	01	Ainno_16251	Ainnocence	AIN1-45_AINNL0045	Lot# MB15NO4145	TC00820839	M011	1.151	ng/ml	43295	94.44							20220127_SR2DTOX_Ab
AB01974207	01	Ainno_16251	Ainnocence	AIN1-45_AINNL0045	Lot# MB15NO4145	TC00820839	M012	0.3641	ng/ml	44550	97.18							20220127_SR2DTOX_Ab
AB01974207	01	Ainno_16251	Ainnocence	AIN1-45_AINNL0045	Lot# MB15NO4145	TC00820839	M013	0.1152	ng/ml	45805	99.92							20220127_SR2DTOX_Ab
AB01974207	01	Ainno_16251	Ainnocence	AIN1-45_AINNL0045	Lot# MB15NO4145	TC00820839	M014	0.03646	ng/ml	43390	94.65							20220127_SR2DTOX_Ab
AB01974207	01	Ainno_16251	Ainnocence	AIN1-45_AINNL0045	Lot# MB15NO4145	TC00820839	M015	0.01154	ng/ml	43025	93.85							20220127_SR2DTOX_Ab
AB01974207	01	Ainno_16251	Ainnocence	AIN1-45_AINNL0045	Lot# MB15NO4145	TC00820839	M016	0.003652	ng/ml	43705	95.34							20220127_SR2DTOX_Ab
AB01974207	01	Ainno_16251	Ainnocence	AIN1-45_AINNL0045	Lot# MB15NO4145	TC00820839	M017	0.001156	ng/ml	42585	92.89							20220127_SR2DTOX_Ab
AB01974207	01	Ainno_16251	Ainnocence	AIN1-45_AINNL0045	Lot# MB15NO4145	TC00820839	M018	0.0003657	ng/ml	44040	96.07							20220127_SR2DTOX_Ab
AB01974207	01	Ainno_16251	Ainnocence	AIN1-45_AINNL0045	Lot# MB15NO4145	TC00820839	M019	0.0001157	ng/ml	44715	97.54							20220127_SR2DTOX_Ab
AB01974207	01	Ainno_16251	Ainnocence	AIN1-45_AINNL0045	Lot# MB15NO4145	TC00820839	M020	3.662e-05	ng/ml	42160	91.96							20220127_SR2DTOX_Ab
AB01974207	01	Ainno_16251	Ainnocence	AIN1-45_AINNL0045	Lot# MB15NO4145	TC00820839	M021	1.159e-05	ng/ml	42215	92.08							20220127_SR2DTOX_Ab
AB01974207	01	Ainno_16251	Ainnocence	AIN1-45_AINNL0045	Lot# MB15NO4145	TC00820839	M022	3.668e-06	ng/ml	41120	89.69							20220127_SR2DTOX_Ab
AB01974208	01	Ainno_16251	Ainnocence	AIN1-46_AINNL0046	Lot# MB15NO4146	TC00820839	N003	13110	ng/ml	48080	104.89	>13110	Inactive	0.09			20	20220127_SR2DTOX_Ab
AB01974208	01	Ainno_16251	Ainnocence	AIN1-46_AINNL0046	Lot# MB15NO4146	TC00820839	N004	4149	ng/ml	44755	97.63							20220127_SR2DTOX_Ab
AB01974208	01	Ainno_16251	Ainnocence	AIN1-46_AINNL0046	Lot# MB15NO4146	TC00820839	N005	1313	ng/ml	46355	101.12							20220127_SR2DTOX_Ab
AB01974208	01	Ainno_16251	Ainnocence	AIN1-46_AINNL0046	Lot# MB15NO4146	TC00820839	N006	415.5	ng/ml	44060	96.11							20220127_SR2DTOX_Ab
AB01974208	01	Ainno_16251	Ainnocence	AIN1-46_AINNL0046	Lot# MB15NO4146	TC00820839	N007	131.5	ng/ml	45140	98.47							20220127_SR2DTOX_Ab
AB01974208	01	Ainno_16251	Ainnocence	AIN1-46_AINNL0046	Lot# MB15NO4146	TC00820839	N008	41.61	ng/ml	44645	97.39							20220127_SR2DTOX_Ab
AB01974208	01	Ainno_16251	Ainnocence	AIN1-46_AINNL0046	Lot# MB15NO4146	TC00820839	N009	13.17	ng/ml	44305	96.65							20220127_SR2DTOX_Ab
AB01974208	01	Ainno_16251	Ainnocence	AIN1-46_AINNL0046	Lot# MB15NO4146	TC00820839	N010	4.167	ng/ml	44025	96.04							20220127_SR2DTOX_Ab
AB01974208	01	Ainno_16251	Ainnocence	AIN1-46_AINNL0046	Lot# MB15NO4146	TC00820839	N011	1.319	ng/ml	42015	91.65							20220127_SR2DTOX_Ab
AB01974208	01	Ainno_16251	Ainnocence	AIN1-46_AINNL0046	Lot# MB15NO4146	TC00820839	N012	0.4173	ng/ml	42985	93.76							20220127_SR2DTOX_Ab
AB01974208	01	Ainno_16251	Ainnocence	AIN1-46_AINNL0046	Lot# MB15NO4146	TC00820839	N013	0.132	ng/ml	43230	94.3							20220127_SR2DTOX_Ab
AB01974208	01	Ainno_16251	Ainnocence	AIN1-46_AINNL0046	Lot# MB15NO4146	TC00820839	N014	0.04179	ng/ml	43205	94.24							20220127_SR2DTOX_Ab
AB01974208	01	Ainno_16251	Ainnocence	AIN1-46_AINNL0046	Lot# MB15NO4146	TC00820839	N015	0.01322	ng/ml	45260	98.73							20220127_SR2DTOX_Ab
AB01974208	01	Ainno_16251	Ainnocence	AIN1-46_AINNL0046	Lot# MB15NO4146	TC00820839	N016	0.004185	ng/ml	43990	95.96							20220127_SR2DTOX_Ab
AB01974208	01	Ainno_16251	Ainnocence	AIN1-46_AINNL0046	Lot# MB15NO4146	TC00820839	N017	0.001324	ng/ml	42525	92.76							20220127_SR2DTOX_Ab
AB01974208	01	Ainno_16251	Ainnocence	AIN1-46_AINNL0046	Lot# MB15NO4146	TC00820839	N018	0.0004191	ng/ml	43745	95.42							20220127_SR2DTOX_Ab
AB01974208	01	Ainno_16251	Ainnocence	AIN1-46_AINNL0046	Lot# MB15NO4146	TC00820839	N019	0.0001326	ng/ml	42930	93.64							20220127_SR2DTOX_Ab
AB01974208	01	Ainno_16251	Ainnocence	AIN1-46_AINNL0046	Lot# MB15NO4146	TC00820839	N020	4.197e-05	ng/ml	44120	96.24							20220127_SR2DTOX_Ab
AB01974208	01	Ainno_16251	Ainnocence	AIN1-46_AINNL0046	Lot# MB15NO4146	TC00820839	N021	1.328e-05	ng/ml	42125	91.89							20220127_SR2DTOX_Ab
AB01974208	01	Ainno_16251	Ainnocence	AIN1-46_AINNL0046	Lot# MB15NO4146	TC00820839	N022	4.203e-06	ng/ml	42080	91.79							20220127_SR2DTOX_Ab
AB01974209	01	Ainno_16251	Ainnocence	AIN1-47_AINNL0047	Lot# MB15NO4147	TC00820839	O003	24780	ng/ml	42755	93.26	>24780	Inactive	0.17			20	20220127_SR2DTOX_Ab
AB01974209	01	Ainno_16251	Ainnocence	AIN1-47_AINNL0047	Lot# MB15NO4147	TC00820839	O004	7842	ng/ml	43005	93.81							20220127_SR2DTOX_Ab
AB01974209	01	Ainno_16251	Ainnocence	AIN1-47_AINNL0047	Lot# MB15NO4147	TC00820839	O005	2482	ng/ml	46025	100.4							20220127_SR2DTOX_Ab
AB01974209	01	Ainno_16251	Ainnocence	AIN1-47_AINNL0047	Lot# MB15NO4147	TC00820839	O006	785.3	ng/ml	44160	96.33							20220127_SR2DTOX_Ab
AB01974209	01	Ainno_16251	Ainnocence	AIN1-47_AINNL0047	Lot# MB15NO4147	TC00820839	O007	248.5	ng/ml	44445	96.95							20220127_SR2DTOX_Ab
AB01974209	01	Ainno_16251	Ainnocence	AIN1-47_AINNL0047	Lot# MB15NO4147	TC00820839	O008	78.64	ng/ml	45005	98.18							20220127_SR2DTOX_Ab
AB01974209	01	Ainno_16251	Ainnocence	AIN1-47_AINNL0047	Lot# MB15NO4147	TC00820839	O009	24.89	ng/ml	44415	96.89							20220127_SR2DTOX_Ab
AB01974209	01	Ainno_16251	Ainnocence	AIN1-47_AINNL0047	Lot# MB15NO4147	TC00820839	O010	7.876	ng/ml	43550	95							20220127_SR2DTOX_Ab
AB01974209	01	Ainno_16251	Ainnocence	AIN1-47_AINNL0047	Lot# MB15NO4147	TC00820839	O011	2.492	ng/ml	44865	97.87							20220127_SR2DTOX_Ab
AB01974209	01	Ainno_16251	Ainnocence	AIN1-47_AINNL0047	Lot# MB15NO4147	TC00820839	O012	0.7887	ng/ml	47735	104.14							20220127_SR2DTOX_Ab
AB01974209	01	Ainno_16251	Ainnocence	AIN1-47_AINNL0047	Lot# MB15NO4147	TC00820839	O013	0.2496	ng/ml	46680	101.83							20220127_SR2DTOX_Ab
AB01974209	01	Ainno_16251	Ainnocence	AIN1-47_AINNL0047	Lot# MB15NO4147	TC00820839	O014	0.07898	ng/ml	42435	92.56							20220127_SR2DTOX_Ab
AB01974209	01	Ainno_16251	Ainnocence	AIN1-47_AINNL0047	Lot# MB15NO4147	TC00820839	O015	0.025	ng/ml	44205	96.43							20220127_SR2DTOX_Ab
AB01974209	01	Ainno_16251	Ainnocence	AIN1-47_AINNL0047	Lot# MB15NO4147	TC00820839	O016	0.00791	ng/ml	44290	96.61							20220127_SR2DTOX_Ab
AB01974209	01	Ainno_16251	Ainnocence	AIN1-47_AINNL0047	Lot# MB15NO4147	TC00820839	O017	0.002503	ng/ml	43260	94.36							20220127_SR2DTOX_Ab
AB01974209	01	Ainno_16251	Ainnocence	AIN1-47_AINNL0047	Lot# MB15NO4147	TC00820839	O018	0.0007921	ng/ml	44420	96.9							20220127_SR2DTOX_Ab
AB01974209	01	Ainno_16251	Ainnocence	AIN1-47_AINNL0047	Lot# MB15NO4147	TC00820839	O019	0.0002507	ng/ml	42305	92.28							20220127_SR2DTOX_Ab
AB01974209	01	Ainno_16251	Ainnocence	AIN1-47_AINNL0047	Lot# MB15NO4147	TC00820839	O020	7.933e-05	ng/ml	41375	90.25							20220127_SR2DTOX_Ab
AB01974209	01	Ainno_16251	Ainnocence	AIN1-47_AINNL0047	Lot# MB15NO4147	TC00820839	O021	2.51e-05	ng/ml	42870	93.51							20220127_SR2DTOX_Ab
AB01974209	01	Ainno_16251	Ainnocence	AIN1-47_AINNL0047	Lot# MB15NO4147	TC00820839	O022	7.944e-06	ng/ml	42405	92.5							20220127_SR2DTOX_Ab
AB01974210	01	Ainno_16251	Ainnocence	AIN1-48_AINNL0048	Lot# MB15NO4148	TC00820839	P003	11000	ng/ml	44250	96.53	>11000	Inactive	0.09			20	20220127_SR2DTOX_Ab
AB01974210	01	Ainno_16251	Ainnocence	AIN1-48_AINNL0048	Lot# MB15NO4148	TC00820839	P004	3481	ng/ml	45305	98.83							20220127_SR2DTOX_Ab
AB01974210	01	Ainno_16251	Ainnocence	AIN1-48_AINNL0048	Lot# MB15NO4148	TC00820839	P005	1102	ng/ml	45155	98.5							20220127_SR2DTOX_Ab
AB01974210	01	Ainno_16251	Ainnocence	AIN1-48_AINNL0048	Lot# MB15NO4148	TC00820839	P006	348.6	ng/ml	45280	98.78							20220127_SR2DTOX_Ab
AB01974210	01	Ainno_16251	Ainnocence	AIN1-48_AINNL0048	Lot# MB15NO4148	TC00820839	P007	110.3	ng/ml	43950	95.87							20220127_SR2DTOX_Ab
AB01974210	01	Ainno_16251	Ainnocence	AIN1-48_AINNL0048	Lot# MB15NO4148	TC00820839	P008	34.91	ng/ml	43090	93.99							20220127_SR2DTOX_Ab
AB01974210	01	Ainno_16251	Ainnocence	AIN1-48_AINNL0048	Lot# MB15NO4148	TC00820839	P009	11.05	ng/ml	44535	97.15							20220127_SR2DTOX_Ab
AB01974210	01	Ainno_16251	Ainnocence	AIN1-48_AINNL0048	Lot# MB15NO4148	TC00820839	P010	3.496	ng/ml	43930	95.83							20220127_SR2DTOX_Ab
AB01974210	01	Ainno_16251	Ainnocence	AIN1-48_AINNL0048	Lot# MB15NO4148	TC00820839	P011	1.106	ng/ml	43235	94.31							20220127_SR2DTOX_Ab
AB01974210	01	Ainno_16251	Ainnocence	AIN1-48_AINNL0048	Lot# MB15NO4148	TC00820839	P012	0.3501	ng/ml	44700	97.51							20220127_SR2DTOX_Ab
AB01974210	01	Ainno_16251	Ainnocence	AIN1-48_AINNL0048	Lot# MB15NO4148	TC00820839	P013	0.1108	ng/ml	42045	91.71							20220127_SR2DTOX_Ab
AB01974210	01	Ainno_16251	Ainnocence	AIN1-48_AINNL0048	Lot# MB15NO4148	TC00820839	P014	0.03506	ng/ml	43435	94.75							20220127_SR2DTOX_Ab
AB01974210	01	Ainno_16251	Ainnocence	AIN1-48_AINNL0048	Lot# MB15NO4148	TC00820839	P015	0.0111	ng/ml	44520	97.12							20220127_SR2DTOX_Ab
AB01974210	01	Ainno_16251	Ainnocence	AIN1-48_AINNL0048	Lot# MB15NO4148	TC00820839	P016	0.003511	ng/ml	43355	94.57							20220127_SR2DTOX_Ab
AB01974210	01	Ainno_16251	Ainnocence	AIN1-48_AINNL0048	Lot# MB15NO4148	TC00820839	P017	0.001111	ng/ml	44385	96.82							20220127_SR2DTOX_Ab
AB01974210	01	Ainno_16251	Ainnocence	AIN1-48_AINNL0048	Lot# MB15NO4148	TC00820839	P018	0.0003516	ng/ml	44515	97.11							20220127_SR2DTOX_Ab
AB01974210	01	Ainno_16251	Ainnocence	AIN1-48_AINNL0048	Lot# MB15NO4148	TC00820839	P019	0.0001113	ng/ml	41955	91.51							20220127_SR2DTOX_Ab
AB01974210	01	Ainno_16251	Ainnocence	AIN1-48_AINNL0048	Lot# MB15NO4148	TC00820839	P020	3.521e-05	ng/ml	41810	91.2							20220127_SR2DTOX_Ab
AB01974210	01	Ainno_16251	Ainnocence	AIN1-48_AINNL0048	Lot# MB15NO4148	TC00820839	P021	1.114e-05	ng/ml	42160	91.96							20220127_SR2DTOX_Ab
AB01974210	01	Ainno_16251	Ainnocence	AIN1-48_AINNL0048	Lot# MB15NO4148	TC00820839	P022	3.526e-06	ng/ml	43345	94.55							20220127_SR2DTOX_Ab
AB01974211	01	Ainno_16251	Ainnocence	AIN1-49_AINNL0049	Lot# MB15NO4149	TC00820842	A003	11220	ng/ml	58685	98.79	>11220	Inactive	0.13			20	20220127_SR2DTOX_Ab
AB01974211	01	Ainno_16251	Ainnocence	AIN1-49_AINNL0049	Lot# MB15NO4149	TC00820842	A004	3551	ng/ml	61550	103.61							20220127_SR2DTOX_Ab
AB01974211	01	Ainno_16251	Ainnocence	AIN1-49_AINNL0049	Lot# MB15NO4149	TC00820842	A005	1124	ng/ml	59835	100.72							20220127_SR2DTOX_Ab
AB01974211	01	Ainno_16251	Ainnocence	AIN1-49_AINNL0049	Lot# MB15NO4149	TC00820842	A006	355.6	ng/ml	60300	101.51							20220127_SR2DTOX_Ab
AB01974211	01	Ainno_16251	Ainnocence	AIN1-49_AINNL0049	Lot# MB15NO4149	TC00820842	A007	112.5	ng/ml	59825	100.71							20220127_SR2DTOX_Ab
AB01974211	01	Ainno_16251	Ainnocence	AIN1-49_AINNL0049	Lot# MB15NO4149	TC00820842	A008	35.61	ng/ml	59525	100.2							20220127_SR2DTOX_Ab
AB01974211	01	Ainno_16251	Ainnocence	AIN1-49_AINNL0049	Lot# MB15NO4149	TC00820842	A009	11.27	ng/ml	60095	101.16							20220127_SR2DTOX_Ab
AB01974211	01	Ainno_16251	Ainnocence	AIN1-49_AINNL0049	Lot# MB15NO4149	TC00820842	A010	3.566	ng/ml	59300	99.82							20220127_SR2DTOX_Ab
AB01974211	01	Ainno_16251	Ainnocence	AIN1-49_AINNL0049	Lot# MB15NO4149	TC00820842	A011	1.128	ng/ml	56230	94.65							20220127_SR2DTOX_Ab
AB01974211	01	Ainno_16251	Ainnocence	AIN1-49_AINNL0049	Lot# MB15NO4149	TC00820842	A012	0.3571	ng/ml	58080	97.77							20220127_SR2DTOX_Ab
AB01974211	01	Ainno_16251	Ainnocence	AIN1-49_AINNL0049	Lot# MB15NO4149	TC00820842	A013	0.113	ng/ml	57595	96.95							20220127_SR2DTOX_Ab
AB01974211	01	Ainno_16251	Ainnocence	AIN1-49_AINNL0049	Lot# MB15NO4149	TC00820842	A014	0.03576	ng/ml	56965	95.89							20220127_SR2DTOX_Ab
AB01974211	01	Ainno_16251	Ainnocence	AIN1-49_AINNL0049	Lot# MB15NO4149	TC00820842	A015	0.01132	ng/ml	56055	94.35							20220127_SR2DTOX_Ab
AB01974211	01	Ainno_16251	Ainnocence	AIN1-49_AINNL0049	Lot# MB15NO4149	TC00820842	A016	0.003581	ng/ml	57515	96.81							20220127_SR2DTOX_Ab
AB01974211	01	Ainno_16251	Ainnocence	AIN1-49_AINNL0049	Lot# MB15NO4149	TC00820842	A017	0.001133	ng/ml	57750	97.21							20220127_SR2DTOX_Ab
AB01974211	01	Ainno_16251	Ainnocence	AIN1-49_AINNL0049	Lot# MB15NO4149	TC00820842	A018	0.0003587	ng/ml	55460	93.35							20220127_SR2DTOX_Ab
AB01974211	01	Ainno_16251	Ainnocence	AIN1-49_AINNL0049	Lot# MB15NO4149	TC00820842	A019	0.0001135	ng/ml	55890	94.07							20220127_SR2DTOX_Ab
AB01974211	01	Ainno_16251	Ainnocence	AIN1-49_AINNL0049	Lot# MB15NO4149	TC00820842	A020	3.592e-05	ng/ml	56100	94.43							20220127_SR2DTOX_Ab
AB01974211	01	Ainno_16251	Ainnocence	AIN1-49_AINNL0049	Lot# MB15NO4149	TC00820842	A021	1.137e-05	ng/ml	58705	98.82							20220127_SR2DTOX_Ab
AB01974211	01	Ainno_16251	Ainnocence	AIN1-49_AINNL0049	Lot# MB15NO4149	TC00820842	A022	3.597e-06	ng/ml	55550	93.5							20220127_SR2DTOX_Ab
AB01974212	01	Ainno_16251	Ainnocence	AIN1-50_AINNL0050	Lot# MB15NO4150	TC00820842	B003	11220	ng/ml	61445	103.44	>11220	Inactive	0.16			20	20220127_SR2DTOX_Ab
AB01974212	01	Ainno_16251	Ainnocence	AIN1-50_AINNL0050	Lot# MB15NO4150	TC00820842	B004	3551	ng/ml	59790	100.65							20220127_SR2DTOX_Ab
AB01974212	01	Ainno_16251	Ainnocence	AIN1-50_AINNL0050	Lot# MB15NO4150	TC00820842	B005	1124	ng/ml	61500	103.53							20220127_SR2DTOX_Ab
AB01974212	01	Ainno_16251	Ainnocence	AIN1-50_AINNL0050	Lot# MB15NO4150	TC00820842	B006	355.6	ng/ml	58065	97.74							20220127_SR2DTOX_Ab
AB01974212	01	Ainno_16251	Ainnocence	AIN1-50_AINNL0050	Lot# MB15NO4150	TC00820842	B007	112.5	ng/ml	60065	101.11							20220127_SR2DTOX_Ab
AB01974212	01	Ainno_16251	Ainnocence	AIN1-50_AINNL0050	Lot# MB15NO4150	TC00820842	B008	35.61	ng/ml	61380	103.33							20220127_SR2DTOX_Ab
AB01974212	01	Ainno_16251	Ainnocence	AIN1-50_AINNL0050	Lot# MB15NO4150	TC00820842	B009	11.27	ng/ml	59770	100.61							20220127_SR2DTOX_Ab
AB01974212	01	Ainno_16251	Ainnocence	AIN1-50_AINNL0050	Lot# MB15NO4150	TC00820842	B010	3.566	ng/ml	58830	99.03							20220127_SR2DTOX_Ab
AB01974212	01	Ainno_16251	Ainnocence	AIN1-50_AINNL0050	Lot# MB15NO4150	TC00820842	B011	1.128	ng/ml	60905	102.53							20220127_SR2DTOX_Ab
AB01974212	01	Ainno_16251	Ainnocence	AIN1-50_AINNL0050	Lot# MB15NO4150	TC00820842	B012	0.3571	ng/ml	57895	97.45							20220127_SR2DTOX_Ab
AB01974212	01	Ainno_16251	Ainnocence	AIN1-50_AINNL0050	Lot# MB15NO4150	TC00820842	B013	0.113	ng/ml	57455	96.71							20220127_SR2DTOX_Ab
AB01974212	01	Ainno_16251	Ainnocence	AIN1-50_AINNL0050	Lot# MB15NO4150	TC00820842	B014	0.03576	ng/ml	59500	100.16							20220127_SR2DTOX_Ab
AB01974212	01	Ainno_16251	Ainnocence	AIN1-50_AINNL0050	Lot# MB15NO4150	TC00820842	B015	0.01132	ng/ml	58030	97.68							20220127_SR2DTOX_Ab
AB01974212	01	Ainno_16251	Ainnocence	AIN1-50_AINNL0050	Lot# MB15NO4150	TC00820842	B016	0.003581	ng/ml	58140	97.87							20220127_SR2DTOX_Ab
AB01974212	01	Ainno_16251	Ainnocence	AIN1-50_AINNL0050	Lot# MB15NO4150	TC00820842	B017	0.001133	ng/ml	57250	96.37							20220127_SR2DTOX_Ab
AB01974212	01	Ainno_16251	Ainnocence	AIN1-50_AINNL0050	Lot# MB15NO4150	TC00820842	B018	0.0003587	ng/ml	55850	94.01							20220127_SR2DTOX_Ab
AB01974212	01	Ainno_16251	Ainnocence	AIN1-50_AINNL0050	Lot# MB15NO4150	TC00820842	B019	0.0001135	ng/ml	57165	96.22							20220127_SR2DTOX_Ab
AB01974212	01	Ainno_16251	Ainnocence	AIN1-50_AINNL0050	Lot# MB15NO4150	TC00820842	B020	3.592e-05	ng/ml	57465	96.73							20220127_SR2DTOX_Ab
AB01974212	01	Ainno_16251	Ainnocence	AIN1-50_AINNL0050	Lot# MB15NO4150	TC00820842	B021	1.137e-05	ng/ml	58475	98.43							20220127_SR2DTOX_Ab
AB01974212	01	Ainno_16251	Ainnocence	AIN1-50_AINNL0050	Lot# MB15NO4150	TC00820842	B022	3.597e-06	ng/ml	58460	98.41							20220127_SR2DTOX_Ab
AB01974213	01	Ainno_16251	Ainnocence	AIN1-16_AINNL0016	Lot# MB15NO4116	TC00820842	C003	11440	ng/ml	61490	103.51	>11440	Inactive	0.13			20	20220127_SR2DTOX_Ab
AB01974213	01	Ainno_16251	Ainnocence	AIN1-16_AINNL0016	Lot# MB15NO4116	TC00820842	C004	3620	ng/ml	56755	95.53							20220127_SR2DTOX_Ab
AB01974213	01	Ainno_16251	Ainnocence	AIN1-16_AINNL0016	Lot# MB15NO4116	TC00820842	C005	1146	ng/ml	59245	99.73							20220127_SR2DTOX_Ab
AB01974213	01	Ainno_16251	Ainnocence	AIN1-16_AINNL0016	Lot# MB15NO4116	TC00820842	C006	362.5	ng/ml	56950	95.86							20220127_SR2DTOX_Ab
AB01974213	01	Ainno_16251	Ainnocence	AIN1-16_AINNL0016	Lot# MB15NO4116	TC00820842	C007	114.7	ng/ml	58365	98.25							20220127_SR2DTOX_Ab
AB01974213	01	Ainno_16251	Ainnocence	AIN1-16_AINNL0016	Lot# MB15NO4116	TC00820842	C008	36.31	ng/ml	58325	98.18							20220127_SR2DTOX_Ab
AB01974213	01	Ainno_16251	Ainnocence	AIN1-16_AINNL0016	Lot# MB15NO4116	TC00820842	C009	11.49	ng/ml	58760	98.91							20220127_SR2DTOX_Ab
AB01974213	01	Ainno_16251	Ainnocence	AIN1-16_AINNL0016	Lot# MB15NO4116	TC00820842	C010	3.636	ng/ml	55420	93.28							20220127_SR2DTOX_Ab
AB01974213	01	Ainno_16251	Ainnocence	AIN1-16_AINNL0016	Lot# MB15NO4116	TC00820842	C011	1.151	ng/ml	55050	92.66							20220127_SR2DTOX_Ab
AB01974213	01	Ainno_16251	Ainnocence	AIN1-16_AINNL0016	Lot# MB15NO4116	TC00820842	C012	0.3641	ng/ml	57840	97.36							20220127_SR2DTOX_Ab
AB01974213	01	Ainno_16251	Ainnocence	AIN1-16_AINNL0016	Lot# MB15NO4116	TC00820842	C013	0.1152	ng/ml	56705	95.45							20220127_SR2DTOX_Ab
AB01974213	01	Ainno_16251	Ainnocence	AIN1-16_AINNL0016	Lot# MB15NO4116	TC00820842	C014	0.03646	ng/ml	54730	92.12							20220127_SR2DTOX_Ab
AB01974213	01	Ainno_16251	Ainnocence	AIN1-16_AINNL0016	Lot# MB15NO4116	TC00820842	C015	0.01154	ng/ml	55215	92.94							20220127_SR2DTOX_Ab
AB01974213	01	Ainno_16251	Ainnocence	AIN1-16_AINNL0016	Lot# MB15NO4116	TC00820842	C016	0.003652	ng/ml	56130	94.48							20220127_SR2DTOX_Ab
AB01974213	01	Ainno_16251	Ainnocence	AIN1-16_AINNL0016	Lot# MB15NO4116	TC00820842	C017	0.001156	ng/ml	56395	94.93							20220127_SR2DTOX_Ab
AB01974213	01	Ainno_16251	Ainnocence	AIN1-16_AINNL0016	Lot# MB15NO4116	TC00820842	C018	0.0003657	ng/ml	55210	92.93							20220127_SR2DTOX_Ab
AB01974213	01	Ainno_16251	Ainnocence	AIN1-16_AINNL0016	Lot# MB15NO4116	TC00820842	C019	0.0001157	ng/ml	54665	92.01							20220127_SR2DTOX_Ab
AB01974213	01	Ainno_16251	Ainnocence	AIN1-16_AINNL0016	Lot# MB15NO4116	TC00820842	C020	3.662e-05	ng/ml	55085	92.72							20220127_SR2DTOX_Ab
AB01974213	01	Ainno_16251	Ainnocence	AIN1-16_AINNL0016	Lot# MB15NO4116	TC00820842	C021	1.159e-05	ng/ml	56000	94.26							20220127_SR2DTOX_Ab
AB01974213	01	Ainno_16251	Ainnocence	AIN1-16_AINNL0016	Lot# MB15NO4116	TC00820842	C022	3.668e-06	ng/ml	56685	95.41							20220127_SR2DTOX_Ab
AB01974161	01	Ainno_16251	Ainnocence	AIN2-1_REGN10933	Lot# MB15OC1436	TC00820842	D003	10000	ng/ml	58720	98.84	>10000	Inactive	0.08			20	20220127_SR2DTOX_Ab
AB01974161	01	Ainno_16251	Ainnocence	AIN2-1_REGN10933	Lot# MB15OC1436	TC00820842	D004	3165	ng/ml	58565	98.58							20220127_SR2DTOX_Ab
AB01974161	01	Ainno_16251	Ainnocence	AIN2-1_REGN10933	Lot# MB15OC1436	TC00820842	D005	1001	ng/ml	55590	93.57							20220127_SR2DTOX_Ab
AB01974161	01	Ainno_16251	Ainnocence	AIN2-1_REGN10933	Lot# MB15OC1436	TC00820842	D006	316.9	ng/ml	56585	95.25							20220127_SR2DTOX_Ab
AB01974161	01	Ainno_16251	Ainnocence	AIN2-1_REGN10933	Lot# MB15OC1436	TC00820842	D007	100.3	ng/ml	57410	96.64							20220127_SR2DTOX_Ab
AB01974161	01	Ainno_16251	Ainnocence	AIN2-1_REGN10933	Lot# MB15OC1436	TC00820842	D008	31.74	ng/ml	57410	96.64							20220127_SR2DTOX_Ab
AB01974161	01	Ainno_16251	Ainnocence	AIN2-1_REGN10933	Lot# MB15OC1436	TC00820842	D009	10.04	ng/ml	57250	96.37							20220127_SR2DTOX_Ab
AB01974161	01	Ainno_16251	Ainnocence	AIN2-1_REGN10933	Lot# MB15OC1436	TC00820842	D010	3.178	ng/ml	55275	93.04							20220127_SR2DTOX_Ab
AB01974161	01	Ainno_16251	Ainnocence	AIN2-1_REGN10933	Lot# MB15OC1436	TC00820842	D011	1.006	ng/ml	56180	94.56							20220127_SR2DTOX_Ab
AB01974161	01	Ainno_16251	Ainnocence	AIN2-1_REGN10933	Lot# MB15OC1436	TC00820842	D012	0.3183	ng/ml	57315	96.48							20220127_SR2DTOX_Ab
AB01974161	01	Ainno_16251	Ainnocence	AIN2-1_REGN10933	Lot# MB15OC1436	TC00820842	D013	0.1007	ng/ml	54780	92.2							20220127_SR2DTOX_Ab
AB01974161	01	Ainno_16251	Ainnocence	AIN2-1_REGN10933	Lot# MB15OC1436	TC00820842	D014	0.03187	ng/ml	57235	96.34							20220127_SR2DTOX_Ab
AB01974161	01	Ainno_16251	Ainnocence	AIN2-1_REGN10933	Lot# MB15OC1436	TC00820842	D015	0.01009	ng/ml	55615	93.61							20220127_SR2DTOX_Ab
AB01974161	01	Ainno_16251	Ainnocence	AIN2-1_REGN10933	Lot# MB15OC1436	TC00820842	D016	0.003192	ng/ml	55250	93							20220127_SR2DTOX_Ab
AB01974161	01	Ainno_16251	Ainnocence	AIN2-1_REGN10933	Lot# MB15OC1436	TC00820842	D017	0.00101	ng/ml	54955	92.5							20220127_SR2DTOX_Ab
AB01974161	01	Ainno_16251	Ainnocence	AIN2-1_REGN10933	Lot# MB15OC1436	TC00820842	D018	0.0003197	ng/ml	53550	90.13							20220127_SR2DTOX_Ab
AB01974161	01	Ainno_16251	Ainnocence	AIN2-1_REGN10933	Lot# MB15OC1436	TC00820842	D019	0.0001012	ng/ml	54415	91.59							20220127_SR2DTOX_Ab
AB01974161	01	Ainno_16251	Ainnocence	AIN2-1_REGN10933	Lot# MB15OC1436	TC00820842	D020	3.201e-05	ng/ml	54110	91.07							20220127_SR2DTOX_Ab
AB01974161	01	Ainno_16251	Ainnocence	AIN2-1_REGN10933	Lot# MB15OC1436	TC00820842	D021	1.013e-05	ng/ml	56845	95.68							20220127_SR2DTOX_Ab
AB01974161	01	Ainno_16251	Ainnocence	AIN2-1_REGN10933	Lot# MB15OC1436	TC00820842	D022	3.206e-06	ng/ml	54070	91.01							20220127_SR2DTOX_Ab
AB01974162	01	Ainno_16251	Ainnocence	AIN2-2_REGN10987	Lot# MB15OC1437	TC00820842	E003	10000	ng/ml	59160	99.59	>10000	Inactive	0.12			20	20220127_SR2DTOX_Ab
AB01974162	01	Ainno_16251	Ainnocence	AIN2-2_REGN10987	Lot# MB15OC1437	TC00820842	E004	3165	ng/ml	56585	95.25							20220127_SR2DTOX_Ab
AB01974162	01	Ainno_16251	Ainnocence	AIN2-2_REGN10987	Lot# MB15OC1437	TC00820842	E005	1001	ng/ml	56285	94.74							20220127_SR2DTOX_Ab
AB01974162	01	Ainno_16251	Ainnocence	AIN2-2_REGN10987	Lot# MB15OC1437	TC00820842	E006	316.9	ng/ml	55080	92.71							20220127_SR2DTOX_Ab
AB01974162	01	Ainno_16251	Ainnocence	AIN2-2_REGN10987	Lot# MB15OC1437	TC00820842	E007	100.3	ng/ml	55995	94.25							20220127_SR2DTOX_Ab
AB01974162	01	Ainno_16251	Ainnocence	AIN2-2_REGN10987	Lot# MB15OC1437	TC00820842	E008	31.74	ng/ml	56130	94.48							20220127_SR2DTOX_Ab
AB01974162	01	Ainno_16251	Ainnocence	AIN2-2_REGN10987	Lot# MB15OC1437	TC00820842	E009	10.04	ng/ml	56120	94.46							20220127_SR2DTOX_Ab
AB01974162	01	Ainno_16251	Ainnocence	AIN2-2_REGN10987	Lot# MB15OC1437	TC00820842	E010	3.178	ng/ml	54325	91.44							20220127_SR2DTOX_Ab
AB01974162	01	Ainno_16251	Ainnocence	AIN2-2_REGN10987	Lot# MB15OC1437	TC00820842	E011	1.006	ng/ml	53535	90.11							20220127_SR2DTOX_Ab
AB01974162	01	Ainno_16251	Ainnocence	AIN2-2_REGN10987	Lot# MB15OC1437	TC00820842	E012	0.3183	ng/ml	54280	91.36							20220127_SR2DTOX_Ab
AB01974162	01	Ainno_16251	Ainnocence	AIN2-2_REGN10987	Lot# MB15OC1437	TC00820842	E013	0.1007	ng/ml	53075	89.33							20220127_SR2DTOX_Ab
AB01974162	01	Ainno_16251	Ainnocence	AIN2-2_REGN10987	Lot# MB15OC1437	TC00820842	E014	0.03187	ng/ml	54800	92.24							20220127_SR2DTOX_Ab
AB01974162	01	Ainno_16251	Ainnocence	AIN2-2_REGN10987	Lot# MB15OC1437	TC00820842	E015	0.01009	ng/ml	54195	91.22							20220127_SR2DTOX_Ab
AB01974162	01	Ainno_16251	Ainnocence	AIN2-2_REGN10987	Lot# MB15OC1437	TC00820842	E016	0.003192	ng/ml	54630	91.95							20220127_SR2DTOX_Ab
AB01974162	01	Ainno_16251	Ainnocence	AIN2-2_REGN10987	Lot# MB15OC1437	TC00820842	E017	0.00101	ng/ml	56715	95.47							20220127_SR2DTOX_Ab
AB01974162	01	Ainno_16251	Ainnocence	AIN2-2_REGN10987	Lot# MB15OC1437	TC00820842	E018	0.0003197	ng/ml	54000	90.89							20220127_SR2DTOX_Ab
AB01974162	01	Ainno_16251	Ainnocence	AIN2-2_REGN10987	Lot# MB15OC1437	TC00820842	E019	0.0001012	ng/ml	52725	88.74							20220127_SR2DTOX_Ab
AB01974162	01	Ainno_16251	Ainnocence	AIN2-2_REGN10987	Lot# MB15OC1437	TC00820842	E020	3.201e-05	ng/ml	57215	96.31							20220127_SR2DTOX_Ab
AB01974162	01	Ainno_16251	Ainnocence	AIN2-2_REGN10987	Lot# MB15OC1437	TC00820842	E021	1.013e-05	ng/ml	55485	93.39							20220127_SR2DTOX_Ab
AB01974162	01	Ainno_16251	Ainnocence	AIN2-2_REGN10987	Lot# MB15OC1437	TC00820842	E022	3.206e-06	ng/ml	56200	94.6							20220127_SR2DTOX_Ab

## Sheet: Ctrl Wells
Object ID	Batch	Plate	Well	Lum	% Viability	Testset ID
Cell Control	01	TC00820833	A001	44425	96.84	20220127_SR2DTOX_Ab
Cell Control	01	TC00820833	A002	44645	97.32	20220127_SR2DTOX_Ab
Cell Control	01	TC00820833	B001	45050	98.2	20220127_SR2DTOX_Ab
Cell Control	01	TC00820833	B002	46425	101.2	20220127_SR2DTOX_Ab
Cell Control	01	TC00820833	C001	45840	99.92	20220127_SR2DTOX_Ab
Cell Control	01	TC00820833	C002	46990	102.43	20220127_SR2DTOX_Ab
Cell Control	01	TC00820833	D001	47180	102.85	20220127_SR2DTOX_Ab
Cell Control	01	TC00820833	D002	46360	101.06	20220127_SR2DTOX_Ab
Cell Control	01	TC00820833	E001	46370	101.08	20220127_SR2DTOX_Ab
Cell Control	01	TC00820833	E002	45330	98.81	20220127_SR2DTOX_Ab
Cell Control	01	TC00820833	F001	45900	100.05	20220127_SR2DTOX_Ab
Cell Control	01	TC00820833	F002	46185	100.68	20220127_SR2DTOX_Ab
Cell Control	01	TC00820833	G001	42855	93.41	20220127_SR2DTOX_Ab
Cell Control	01	TC00820833	G002	45825	99.89	20220127_SR2DTOX_Ab
Cell Control	01	TC00820833	H001	48860	106.51	20220127_SR2DTOX_Ab
Cell Control	01	TC00820833	H002	44645	97.32	20220127_SR2DTOX_Ab
Cell Control	01	TC00820833	I001	47240	102.98	20220127_SR2DTOX_Ab
Cell Control	01	TC00820833	I002	45570	99.33	20220127_SR2DTOX_Ab
Cell Control	01	TC00820833	J001	45620	99.44	20220127_SR2DTOX_Ab
Cell Control	01	TC00820833	J002	45150	98.42	20220127_SR2DTOX_Ab
Cell Control	01	TC00820833	K001	47435	103.4	20220127_SR2DTOX_Ab
Cell Control	01	TC00820833	K002	48020	104.68	20220127_SR2DTOX_Ab
Cell Control	01	TC00820833	L001	46195	100.7	20220127_SR2DTOX_Ab
Cell Control	01	TC00820833	L002	46365	101.07	20220127_SR2DTOX_Ab
Cell Control	01	TC00820833	M001	46555	101.48	20220127_SR2DTOX_Ab
Cell Control	01	TC00820833	M002	45620	99.44	20220127_SR2DTOX_Ab
Cell Control	01	TC00820833	N001	46185	100.68	20220127_SR2DTOX_Ab
Cell Control	01	TC00820833	N002	45640	99.49	20220127_SR2DTOX_Ab
Cell Control	01	TC00820833	O001	45040	98.18	20220127_SR2DTOX_Ab
Cell Control	01	TC00820833	O002	44240	96.43	20220127_SR2DTOX_Ab
Cell Control	01	TC00820833	P001	45385	98.93	20220127_SR2DTOX_Ab
Cell Control	01	TC00820833	P002	44855	97.77	20220127_SR2DTOX_Ab
Cell Control	01	TC00820836	A001	46085	100.04	20220127_SR2DTOX_Ab
Cell Control	01	TC00820836	A002	45340	98.42	20220127_SR2DTOX_Ab
Cell Control	01	TC00820836	B001	45270	98.27	20220127_SR2DTOX_Ab
Cell Control	01	TC00820836	B002	47265	102.61	20220127_SR2DTOX_Ab
Cell Control	01	TC00820836	C001	45160	98.03	20220127_SR2DTOX_Ab
Cell Control	01	TC00820836	C002	45915	99.67	20220127_SR2DTOX_Ab
Cell Control	01	TC00820836	D001	48365	105	20220127_SR2DTOX_Ab
Cell Control	01	TC00820836	D002	47945	104.08	20220127_SR2DTOX_Ab
Cell Control	01	TC00820836	E001	44850	97.36	20220127_SR2DTOX_Ab
Cell Control	01	TC00820836	E002	45090	97.88	20220127_SR2DTOX_Ab
Cell Control	01	TC00820836	F001	45420	98.6	20220127_SR2DTOX_Ab
Cell Control	01	TC00820836	F002	44875	97.41	20220127_SR2DTOX_Ab
Cell Control	01	TC00820836	G001	46445	100.82	20220127_SR2DTOX_Ab
Cell Control	01	TC00820836	G002	45185	98.08	20220127_SR2DTOX_Ab
Cell Control	01	TC00820836	H001	45295	98.32	20220127_SR2DTOX_Ab
Cell Control	01	TC00820836	H002	45970	99.79	20220127_SR2DTOX_Ab
Cell Control	01	TC00820836	I001	48445	105.17	20220127_SR2DTOX_Ab
Cell Control	01	TC00820836	I002	47040	102.12	20220127_SR2DTOX_Ab
Cell Control	01	TC00820836	J001	45855	99.54	20220127_SR2DTOX_Ab
Cell Control	01	TC00820836	J002	44685	97	20220127_SR2DTOX_Ab
Cell Control	01	TC00820836	K001	45635	99.06	20220127_SR2DTOX_Ab
Cell Control	01	TC00820836	K002	45950	99.75	20220127_SR2DTOX_Ab
Cell Control	01	TC00820836	L001	44560	96.73	20220127_SR2DTOX_Ab
Cell Control	01	TC00820836	L002	46275	100.45	20220127_SR2DTOX_Ab
Cell Control	01	TC00820836	M001	46985	102	20220127_SR2DTOX_Ab
Cell Control	01	TC00820836	M002	48630	105.57	20220127_SR2DTOX_Ab
Cell Control	01	TC00820836	N001	47195	102.45	20220127_SR2DTOX_Ab
Cell Control	01	TC00820836	N002	46665	101.3	20220127_SR2DTOX_Ab
Cell Control	01	TC00820836	O001	46080	100.03	20220127_SR2DTOX_Ab
Cell Control	01	TC00820836	O002	46060	99.99	20220127_SR2DTOX_Ab
Cell Control	01	TC00820836	P001	44650	96.92	20220127_SR2DTOX_Ab
Cell Control	01	TC00820836	P002	44930	97.53	20220127_SR2DTOX_Ab
Cell Control	01	TC00820839	A001	46810	102.12	20220127_SR2DTOX_Ab
Cell Control	01	TC00820839	A002	46750	101.99	20220127_SR2DTOX_Ab
Cell Control	01	TC00820839	B001	45300	98.82	20220127_SR2DTOX_Ab
Cell Control	01	TC00820839	B002	46615	101.69	20220127_SR2DTOX_Ab
Cell Control	01	TC00820839	C001	44380	96.81	20220127_SR2DTOX_Ab
Cell Control	01	TC00820839	C002	47030	102.6	20220127_SR2DTOX_Ab
Cell Control	01	TC00820839	D001	44445	96.95	20220127_SR2DTOX_Ab
Cell Control	01	TC00820839	D002	47470	103.56	20220127_SR2DTOX_Ab
Cell Control	01	TC00820839	E001	46100	100.57	20220127_SR2DTOX_Ab
Cell Control	01	TC00820839	E002	44150	96.31	20220127_SR2DTOX_Ab
Cell Control	01	TC00820839	F001	44480	97.03	20220127_SR2DTOX_Ab
Cell Control	01	TC00820839	F002	46235	100.86	20220127_SR2DTOX_Ab
Cell Control	01	TC00820839	G001	44320	96.68	20220127_SR2DTOX_Ab
Cell Control	01	TC00820839	G002	44780	97.68	20220127_SR2DTOX_Ab
Cell Control	01	TC00820839	H001	44955	98.07	20220127_SR2DTOX_Ab
Cell Control	01	TC00820839	H002	44505	97.08	20220127_SR2DTOX_Ab
Cell Control	01	TC00820839	I001	45285	98.79	20220127_SR2DTOX_Ab
Cell Control	01	TC00820839	I002	45750	99.8	20220127_SR2DTOX_Ab
Cell Control	01	TC00820839	J001	48815	106.5	20220127_SR2DTOX_Ab
Cell Control	01	TC00820839	J002	45595	99.46	20220127_SR2DTOX_Ab
Cell Control	01	TC00820839	K001	45455	99.16	20220127_SR2DTOX_Ab
Cell Control	01	TC00820839	K002	45540	99.34	20220127_SR2DTOX_Ab
Cell Control	01	TC00820839	L001	45940	100.22	20220127_SR2DTOX_Ab
Cell Control	01	TC00820839	L002	48650	106.14	20220127_SR2DTOX_Ab
Cell Control	01	TC00820839	M001	47275	103.13	20220127_SR2DTOX_Ab
Cell Control	01	TC00820839	M002	44975	98.11	20220127_SR2DTOX_Ab
Cell Control	01	TC00820839	N001	46385	101.19	20220127_SR2DTOX_Ab
Cell Control	01	TC00820839	N002	46510	101.46	20220127_SR2DTOX_Ab
Cell Control	01	TC00820839	O001	46440	101.31	20220127_SR2DTOX_Ab
Cell Control	01	TC00820839	O002	46440	101.31	20220127_SR2DTOX_Ab
Cell Control	01	TC00820839	P001	44200	96.42	20220127_SR2DTOX_Ab
Cell Control	01	TC00820839	P002	45315	98.85	20220127_SR2DTOX_Ab
Cell Control	01	TC00820842	A001	58035	97.69	20220127_SR2DTOX_Ab
Cell Control	01	TC00820842	A002	58685	98.79	20220127_SR2DTOX_Ab
Cell Control	01	TC00820842	B001	59565	100.27	20220127_SR2DTOX_Ab
Cell Control	01	TC00820842	B002	61565	103.64	20220127_SR2DTOX_Ab
Cell Control	01	TC00820842	C001	61165	102.96	20220127_SR2DTOX_Ab
Cell Control	01	TC00820842	C002	63310	106.58	20220127_SR2DTOX_Ab
Cell Control	01	TC00820842	D001	59755	100.59	20220127_SR2DTOX_Ab
Cell Control	01	TC00820842	D002	59320	99.86	20220127_SR2DTOX_Ab
Cell Control	01	TC00820842	E001	60320	101.54	20220127_SR2DTOX_Ab
Cell Control	01	TC00820842	E002	59605	100.34	20220127_SR2DTOX_Ab
Cell Control	01	TC00820842	F001	58780	98.95	20220127_SR2DTOX_Ab
Cell Control	01	TC00820842	F002	57410	96.64	20220127_SR2DTOX_Ab
Cell Control	01	TC00820842	G001	58455	98.4	20220127_SR2DTOX_Ab
Cell Control	01	TC00820842	G002	59110	99.5	20220127_SR2DTOX_Ab
Cell Control	01	TC00820842	H001	63920	107.61	20220127_SR2DTOX_Ab
Cell Control	01	TC00820842	H002	59880	100.8	20220127_SR2DTOX_Ab
Cell Control	01	TC00820842	I001	60415	101.7	20220127_SR2DTOX_Ab
Cell Control	01	TC00820842	I002	58760	98.91	20220127_SR2DTOX_Ab
Cell Control	01	TC00820842	J001	58495	98.47	20220127_SR2DTOX_Ab
Cell Control	01	TC00820842	J002	58800	98.98	20220127_SR2DTOX_Ab
Cell Control	01	TC00820842	K001	57510	96.81	20220127_SR2DTOX_Ab
Cell Control	01	TC00820842	K002	64240	108.15	20220127_SR2DTOX_Ab
Cell Control	01	TC00820842	L001	59895	100.82	20220127_SR2DTOX_Ab
Cell Control	01	TC00820842	L002	61580	103.66	20220127_SR2DTOX_Ab
Cell Control	01	TC00820842	M001	58470	98.42	20220127_SR2DTOX_Ab
Cell Control	01	TC00820842	M002	60755	102.27	20220127_SR2DTOX_Ab
Cell Control	01	TC00820842	N001	58855	99.07	20220127_SR2DTOX_Ab
Cell Control	01	TC00820842	N002	60295	101.5	20220127_SR2DTOX_Ab
Cell Control	01	TC00820842	O001	55875	94.05	20220127_SR2DTOX_Ab
Cell Control	01	TC00820842	O002	57000	95.95	20220127_SR2DTOX_Ab
Cell Control	01	TC00820842	P001	55290	93.06	20220127_SR2DTOX_Ab
Cell Control	01	TC00820842	P002	55870	94.04	20220127_SR2DTOX_Ab
PosCtrl	01	TC00820833	A023	60	0.01	20220127_SR2DTOX_Ab
PosCtrl	01	TC00820833	A024	20	-0.08	20220127_SR2DTOX_Ab
PosCtrl	01	TC00820833	B023	80	0.05	20220127_SR2DTOX_Ab
PosCtrl	01	TC00820833	B024	30	-0.06	20220127_SR2DTOX_Ab
PosCtrl	01	TC00820833	C023	75	0.04	20220127_SR2DTOX_Ab
PosCtrl	01	TC00820833	C024	20	-0.08	20220127_SR2DTOX_Ab
PosCtrl	01	TC00820833	D023	80	0.05	20220127_SR2DTOX_Ab
PosCtrl	01	TC00820833	D024	65	0.02	20220127_SR2DTOX_Ab
PosCtrl	01	TC00820833	E023	80	0.05	20220127_SR2DTOX_Ab
PosCtrl	01	TC00820833	E024	50	-0.02	20220127_SR2DTOX_Ab
PosCtrl	01	TC00820833	F023	85	0.06	20220127_SR2DTOX_Ab
PosCtrl	01	TC00820833	F024	50	-0.02	20220127_SR2DTOX_Ab
PosCtrl	01	TC00820833	G023	100	0.09	20220127_SR2DTOX_Ab
PosCtrl	01	TC00820833	G024	35	-0.05	20220127_SR2DTOX_Ab
PosCtrl	01	TC00820833	H023	125	0.15	20220127_SR2DTOX_Ab
PosCtrl	01	TC00820833	H024	25	-0.07	20220127_SR2DTOX_Ab
PosCtrl	01	TC00820833	I023	95	0.08	20220127_SR2DTOX_Ab
PosCtrl	01	TC00820833	I024	60	0.01	20220127_SR2DTOX_Ab
PosCtrl	01	TC00820833	J023	70	0.03	20220127_SR2DTOX_Ab
PosCtrl	01	TC00820833	J024	40	-0.04	20220127_SR2DTOX_Ab
PosCtrl	01	TC00820833	K023	75	0.04	20220127_SR2DTOX_Ab
PosCtrl	01	TC00820833	K024	35	-0.05	20220127_SR2DTOX_Ab
PosCtrl	01	TC00820833	L023	80	0.05	20220127_SR2DTOX_Ab
PosCtrl	01	TC00820833	L024	35	-0.05	20220127_SR2DTOX_Ab
PosCtrl	01	TC00820833	M023	70	0.03	20220127_SR2DTOX_Ab
PosCtrl	01	TC00820833	M024	40	-0.04	20220127_SR2DTOX_Ab
PosCtrl	01	TC00820833	N023	60	0.01	20220127_SR2DTOX_Ab
PosCtrl	01	TC00820833	N024	25	-0.07	20220127_SR2DTOX_Ab
PosCtrl	01	TC00820833	O023	65	0.02	20220127_SR2DTOX_Ab
PosCtrl	01	TC00820833	O024	50	-0.02	20220127_SR2DTOX_Ab
PosCtrl	01	TC00820833	P023	30	-0.06	20220127_SR2DTOX_Ab
PosCtrl	01	TC00820833	P024	15	-0.09	20220127_SR2DTOX_Ab
PosCtrl	01	TC00820836	A023	70	0.02	20220127_SR2DTOX_Ab
PosCtrl	01	TC00820836	A024	45	-0.03	20220127_SR2DTOX_Ab
PosCtrl	01	TC00820836	B023	90	0.07	20220127_SR2DTOX_Ab
PosCtrl	01	TC00820836	B024	35	-0.05	20220127_SR2DTOX_Ab
PosCtrl	01	TC00820836	C023	105	0.1	20220127_SR2DTOX_Ab
PosCtrl	01	TC00820836	C024	45	-0.03	20220127_SR2DTOX_Ab
PosCtrl	01	TC00820836	D023	90	0.07	20220127_SR2DTOX_Ab
PosCtrl	01	TC00820836	D024	45	-0.03	20220127_SR2DTOX_Ab
PosCtrl	01	TC00820836	E023	90	0.07	20220127_SR2DTOX_Ab
PosCtrl	01	TC00820836	E024	35	-0.05	20220127_SR2DTOX_Ab
PosCtrl	01	TC00820836	F023	70	0.02	20220127_SR2DTOX_Ab
PosCtrl	01	TC00820836	F024	60	0	20220127_SR2DTOX_Ab
PosCtrl	01	TC00820836	G023	85	0.05	20220127_SR2DTOX_Ab
PosCtrl	01	TC00820836	G024	30	-0.06	20220127_SR2DTOX_Ab
PosCtrl	01	TC00820836	H023	65	0.01	20220127_SR2DTOX_Ab
PosCtrl	01	TC00820836	H024	40	-0.04	20220127_SR2DTOX_Ab
PosCtrl	01	TC00820836	I023	80	0.04	20220127_SR2DTOX_Ab
PosCtrl	01	TC00820836	I024	35	-0.05	20220127_SR2DTOX_Ab
PosCtrl	01	TC00820836	J023	75	0.03	20220127_SR2DTOX_Ab
PosCtrl	01	TC00820836	J024	35	-0.05	20220127_SR2DTOX_Ab
PosCtrl	01	TC00820836	K023	90	0.07	20220127_SR2DTOX_Ab
PosCtrl	01	TC00820836	K024	25	-0.08	20220127_SR2DTOX_Ab
PosCtrl	01	TC00820836	L023	90	0.07	20220127_SR2DTOX_Ab
PosCtrl	01	TC00820836	L024	35	-0.05	20220127_SR2DTOX_Ab
PosCtrl	01	TC00820836	M023	80	0.04	20220127_SR2DTOX_Ab
PosCtrl	01	TC00820836	M024	45	-0.03	20220127_SR2DTOX_Ab
PosCtrl	01	TC00820836	N023	65	0.01	20220127_SR2DTOX_Ab
PosCtrl	01	TC00820836	N024	50	-0.02	20220127_SR2DTOX_Ab
PosCtrl	01	TC00820836	O023	55	-0.01	20220127_SR2DTOX_Ab
PosCtrl	01	TC00820836	O024	80	0.04	20220127_SR2DTOX_Ab
PosCtrl	01	TC00820836	P023	55	-0.01	20220127_SR2DTOX_Ab
PosCtrl	01	TC00820836	P024	20	-0.09	20220127_SR2DTOX_Ab
PosCtrl	01	TC00820839	A023	40	-0.03	20220127_SR2DTOX_Ab
PosCtrl	01	TC00820839	A024	20	-0.07	20220127_SR2DTOX_Ab
PosCtrl	01	TC00820839	B023	70	0.04	20220127_SR2DTOX_Ab
PosCtrl	01	TC00820839	B024	35	-0.04	20220127_SR2DTOX_Ab
PosCtrl	01	TC00820839	C023	55	0.01	20220127_SR2DTOX_Ab
PosCtrl	01	TC00820839	C024	40	-0.03	20220127_SR2DTOX_Ab
PosCtrl	01	TC00820839	D023	100	0.1	20220127_SR2DTOX_Ab
PosCtrl	01	TC00820839	D024	30	-0.05	20220127_SR2DTOX_Ab
PosCtrl	01	TC00820839	E023	55	0.01	20220127_SR2DTOX_Ab
PosCtrl	01	TC00820839	E024	30	-0.05	20220127_SR2DTOX_Ab
PosCtrl	01	TC00820839	F023	70	0.04	20220127_SR2DTOX_Ab
PosCtrl	01	TC00820839	F024	20	-0.07	20220127_SR2DTOX_Ab
PosCtrl	01	TC00820839	G023	65	0.03	20220127_SR2DTOX_Ab
PosCtrl	01	TC00820839	G024	50	-0.01	20220127_SR2DTOX_Ab
PosCtrl	01	TC00820839	H023	90	0.08	20220127_SR2DTOX_Ab
PosCtrl	01	TC00820839	H024	25	-0.06	20220127_SR2DTOX_Ab
PosCtrl	01	TC00820839	I023	75	0.05	20220127_SR2DTOX_Ab
PosCtrl	01	TC00820839	I024	85	0.07	20220127_SR2DTOX_Ab
PosCtrl	01	TC00820839	J023	85	0.07	20220127_SR2DTOX_Ab
PosCtrl	01	TC00820839	J024	10	-0.09	20220127_SR2DTOX_Ab
PosCtrl	01	TC00820839	K023	85	0.07	20220127_SR2DTOX_Ab
PosCtrl	01	TC00820839	K024	25	-0.06	20220127_SR2DTOX_Ab
PosCtrl	01	TC00820839	L023	85	0.07	20220127_SR2DTOX_Ab
PosCtrl	01	TC00820839	L024	45	-0.02	20220127_SR2DTOX_Ab
PosCtrl	01	TC00820839	M023	85	0.07	20220127_SR2DTOX_Ab
PosCtrl	01	TC00820839	M024	30	-0.05	20220127_SR2DTOX_Ab
PosCtrl	01	TC00820839	N023	65	0.03	20220127_SR2DTOX_Ab
PosCtrl	01	TC00820839	N024	30	-0.05	20220127_SR2DTOX_Ab
PosCtrl	01	TC00820839	O023	60	0.02	20220127_SR2DTOX_Ab
PosCtrl	01	TC00820839	O024	45	-0.02	20220127_SR2DTOX_Ab
PosCtrl	01	TC00820839	P023	50	-0.01	20220127_SR2DTOX_Ab
PosCtrl	01	TC00820839	P024	25	-0.06	20220127_SR2DTOX_Ab
PosCtrl	01	TC00820842	A023	80	0.02	20220127_SR2DTOX_Ab
PosCtrl	01	TC00820842	A024	40	-0.05	20220127_SR2DTOX_Ab
PosCtrl	01	TC00820842	B023	75	0.01	20220127_SR2DTOX_Ab
PosCtrl	01	TC00820842	B024	35	-0.06	20220127_SR2DTOX_Ab
PosCtrl	01	TC00820842	C023	110	0.07	20220127_SR2DTOX_Ab
PosCtrl	01	TC00820842	C024	60	-0.02	20220127_SR2DTOX_Ab
PosCtrl	01	TC00820842	D023	100	0.05	20220127_SR2DTOX_Ab
PosCtrl	01	TC00820842	D024	45	-0.04	20220127_SR2DTOX_Ab
PosCtrl	01	TC00820842	E023	115	0.08	20220127_SR2DTOX_Ab
PosCtrl	01	TC00820842	E024	40	-0.05	20220127_SR2DTOX_Ab
PosCtrl	01	TC00820842	F023	110	0.07	20220127_SR2DTOX_Ab
PosCtrl	01	TC00820842	F024	35	-0.06	20220127_SR2DTOX_Ab
PosCtrl	01	TC00820842	G023	85	0.03	20220127_SR2DTOX_Ab
PosCtrl	01	TC00820842	G024	40	-0.05	20220127_SR2DTOX_Ab
PosCtrl	01	TC00820842	H023	100	0.05	20220127_SR2DTOX_Ab
PosCtrl	01	TC00820842	H024	60	-0.02	20220127_SR2DTOX_Ab
PosCtrl	01	TC00820842	I023	100	0.05	20220127_SR2DTOX_Ab
PosCtrl	01	TC00820842	I024	50	-0.03	20220127_SR2DTOX_Ab
PosCtrl	01	TC00820842	J023	100	0.05	20220127_SR2DTOX_Ab
PosCtrl	01	TC00820842	J024	45	-0.04	20220127_SR2DTOX_Ab
PosCtrl	01	TC00820842	K023	85	0.03	20220127_SR2DTOX_Ab
PosCtrl	01	TC00820842	K024	45	-0.04	20220127_SR2DTOX_Ab
PosCtrl	01	TC00820842	L023	105	0.06	20220127_SR2DTOX_Ab
PosCtrl	01	TC00820842	L024	45	-0.04	20220127_SR2DTOX_Ab
PosCtrl	01	TC00820842	M023	100	0.05	20220127_SR2DTOX_Ab
PosCtrl	01	TC00820842	M024	40	-0.05	20220127_SR2DTOX_Ab
PosCtrl	01	TC00820842	N023	105	0.06	20220127_SR2DTOX_Ab
PosCtrl	01	TC00820842	N024	40	-0.05	20220127_SR2DTOX_Ab
PosCtrl	01	TC00820842	O023	85	0.03	20220127_SR2DTOX_Ab
PosCtrl	01	TC00820842	O024	50	-0.03	20220127_SR2DTOX_Ab
PosCtrl	01	TC00820842	P023	60	-0.02	20220127_SR2DTOX_Ab
PosCtrl	01	TC00820842	P024	35	-0.06	20220127_SR2DTOX_Ab

## Sheet: Batch Ctrl
Plate	Z Analysis	Avg Cell Ctrl	StDev Cell Ctrl	CV Cell Ctrl	Avg Pos Ctrl	StDev Pos Ctrl	CV Pos Ctrl	Testset ID
TC00820833	0.92	45875	1181	2.57	57.0312	27	46.86	20220127_SR2DTOX_Ab
TC00820836	0.92	46066.1	1157	2.51	59.8438	24	39.27	20220127_SR2DTOX_Ab
TC00820839	0.92	45840.5	1223	2.67	52.5	25	47.65	20220127_SR2DTOX_Ab
TC00820842	0.89	59405.8	2113	3.56	69.375	28	40.72	20220127_SR2DTOX_Ab

## Sheet: Notes
	Abase testset ID:	20220127_SR2DTOX_Ab
