# Supplementary material for: AI Designed, Mutation Resistant Broad Neutralizing Antibodies Against Multiple SARS-CoV-2 Strains
Source: Research Square preprint supplement (doi:10.21203/rs.3.rs-5184292/v1), 2025-03-27
Supplement: Supplementary file 25 [file S4c_2022-0127_SARS2_Delta_Ainnocence_Antibodies_Comparison_Report.xlsx]

## Sheet: Cmpds DR Comparison
Compound ID	Batch	Library	Supplier	Supplier Id	Main screen, IC50 (ng/mL)	Main screen, Graph	Main screen, Activity Status	Main screen, Max % Inhibition	Main screen, Conc @ Max % Inhibition	Main screen, Number Included Points	TOX, CC50 (ng/mL)	TOX, Graph	TOX, Activity Status	TOX, Min % Viability	TOX, Conc @ Min % Viability	TOX, Max % Viability	TOX, Conc @ Max % Viability	TOX, Number Included Points
AB01974161	01	Ainno_16251	Ainnocence	AIN2-1_REGN10933	1.21		Active	159.93	3.178	40	>10000		Inactive	90.13	0.0003197	98.84	10000	20
AB01974177	01	Ainno_16251	Ainnocence	AIN1-31_AINNL0031	2.704		Active	116.48	98.08	40	>9780		Inactive	91.49	0.0003126	104.54	98.08	20
AB01974162	01	Ainno_16251	Ainnocence	AIN2-2_REGN10987	4.704		Active	128.86	31.74	40	>10000		Inactive	88.74	0.0001012	99.59	10000	20
AB01974210	01	Ainno_16251	Ainnocence	AIN1-48_AINNL0048	14.076		Active	109.96	110.3	40	>11000		Inactive	91.2	3.521e-05	98.83	3481	20
AB01974191	01	Ainno_16251	Ainnocence	AIN1-42_AINNL0042	36.134		Active	131.78	109.2	40	>10890		Inactive	91.09	3.491e-06	108.57	0.01098	20
AB01974207	01	Ainno_16251	Ainnocence	AIN1-45_AINNL0045	42.743		Active	102.12	114.7	40	>11440		Inactive	89.69	3.668e-06	102.73	3620	20
AB01974211	01	Ainno_16251	Ainnocence	AIN1-49_AINNL0049	89.647		Active	169.39	355.6	40	>11220		Inactive	93.35	0.0003587	103.61	3551	20
AB01974212	01	Ainno_16251	Ainnocence	AIN1-50_AINNL0050	89.943		Active	108.57	3551	40	>11220		Inactive	94.01	0.0003587	103.53	1124	20
AB01974205	01	Ainno_16251	Ainnocence	AIN1-43_AINNL0043	196.18		Active	123.23	1235	40	>12330		Inactive	91.59	3.953e-06	101.78	390.8	20
AB01974187	01	Ainno_16251	Ainnocence	AIN1-38_AINNL0038	199.241		Active	160.54	1091	40	>10890		Inactive	95.64	109.2	101.41	0.0001102	20
AB01974189	01	Ainno_16251	Ainnocence	AIN1-40_AINNL0040	1142.85		Active	138.69	3411	40	>10780		Inactive	88.33	0.000109	102.83	3.426	20
AB01974209	01	Ainno_16251	Ainnocence	AIN1-47_AINNL0047	1880.59		Active	117.5	7842	40	>24780		Inactive	90.25	7.933e-05	104.14	0.7887	20
AB01974175	01	Ainno_16251	Ainnocence	AIN1-29_AINNL0029	>10000		Inactive	3.17	10.04	39	>10000		Inactive	93.67	100.3	103.62	0.0003197	20
AB01974178	01	Ainno_16251	Ainnocence	AIN1-32_AINNL0032	>10220		Inactive	2.72	102.5	40	>10220		Inactive	92.86	0.0001034	100.74	0.001032	20
AB01974172	01	Ainno_16251	Ainnocence	AIN1-22_AINNL0022	>10220		Inactive	2.87	3.248	40	>10220		Inactive	96.01	0.03258	106.89	10220	20
AB01974179	01	Ainno_16251	Ainnocence	AIN1-33_AINNL0033	>10670		Inactive	1.35	33.86	40	>10670		Inactive	94.19	3.421e-06	107.78	107	20
AB01974188	01	Ainno_16251	Ainnocence	AIN1-39_AINNL0039	>10670		Inactive	7.02	10670	40	>10670		Inactive	90.16	0.0001079	105.9	1069	20
AB01974185	01	Ainno_16251	Ainnocence	AIN1-13_AINNL0013	>10670		Inactive	1.94	0.01076	40	>10670		Inactive	91.69	0.03401	106.3	3377	20
AB01974186	01	Ainno_16251	Ainnocence	AIN1-15_AINNL0015	>10780		Inactive	2.96	10780	40	>10780		Inactive	91.66	10.83	104.27	0.01087	20
AB01974173	01	Ainno_16251	Ainnocence	AIN1-26_AINNL0026	>10890		Inactive	2.61	0.3466	40	>10890		Inactive	94.22	1.103e-05	100.95	345.1	20
AB01974190	01	Ainno_16251	Ainnocence	AIN1-41_AINNL0041	>10890		Inactive	18.03	0.03471	40	>10890		Inactive	93.81	0.1097	104.78	10.94	20
AB01974171	01	Ainno_16251	Ainnocence	AIN1-21_AINNL0021	>11000		Inactive	2.87	110.3	40	>11000		Inactive	95.34	3.526e-06	117.1	0.003511	20
AB01974181	01	Ainno_16251	Ainnocence	AIN1-1_AINNL0001	>11000		Inactive	1.9	0.03506	40	>11000		Inactive	96.28	3.526e-06	109.64	0.1108	20
AB01974170	01	Ainno_16251	Ainnocence	AIN1-18_AINNL0018	>11220		Inactive	2.96	3551	40	>11220		Inactive	91.99	0.003581	107.34	0.3571	20
AB01974206	01	Ainno_16251	Ainnocence	AIN1-44_AINNL0044	>11440		Inactive	2.44	3.662e-05	40	>11440		Inactive	92.18	3.662e-05	102.02	11440	20
AB01974213	01	Ainno_16251	Ainnocence	AIN1-16_AINNL0016	>11440		Inactive	2.65	0.1152	40	>11440		Inactive	92.01	0.0001157	103.51	11440	20
AB01974163	01	Ainno_16251	Ainnocence	AIN1-3_AINNL0003	>11670		Inactive	1.24	1.182e-05	40	>11670		Inactive	94	1.182e-05	107.34	0.3714	20
AB01974169	01	Ainno_16251	Ainnocence	AIN1-10_AINNL0010	>11670		Inactive	2.19	0.000373	40	>11670		Inactive	94.97	0.003725	104.79	0.000373	20
AB01974198	01	Ainno_16251	Ainnocence	AIN1-19_AINNL0019	>11670		Inactive	2.5	3.741e-06	40	>11670		Inactive	94.59	3.741e-06	107.64	11.72	20
AB01974194	01	Ainno_16251	Ainnocence	AIN1-17_AINNL0017	>11780		Inactive	1.62	1180	40	>11780		Inactive	91.98	373.3	99.4	0.03755	20
AB01974167	01	Ainno_16251	Ainnocence	AIN1-8_AINNL0008	>11780		Inactive	2.79	0.03755	40	>11780		Inactive	96.2	0.03755	106.48	11.83	20
AB01974166	01	Ainno_16251	Ainnocence	AIN1-7_AINNL0007	>11780		Inactive	2.31	11780	40	>11780		Inactive	98.79	1.193e-05	113.76	118.1	20
AB01974165	01	Ainno_16251	Ainnocence	AIN1-6_AINNL0006	>11780		Inactive	1.46	37.39	39	>11780		Inactive	99.65	0.00376	109.08	0.00119	20
AB01974164	01	Ainno_16251	Ainnocence	AIN1-5_AINNL0005	>11780		Inactive	0.78	11780	40	>11780		Inactive	100.04	0.0001192	119.62	1.193e-05	20
AB01974193	01	Ainno_16251	Ainnocence	AIN1-14_AINNL0014	>11890		Inactive	1.83	1.205e-05	40	>11890		Inactive	93.21	0.0379	107.02	0.3784	20
AB01974199	01	Ainno_16251	Ainnocence	AIN1-24_AINNL0024	>12110		Inactive	1.71	3.877e-05	40	>12110		Inactive	90.72	1.227e-05	102.69	3.849	20
AB01974168	01	Ainno_16251	Ainnocence	AIN1-9_AINNL0009	>12330		Inactive	2.06	123.7	40	>12330		Inactive	97.05	1235	105.42	0.1242	20
AB01974208	01	Ainno_16251	Ainnocence	AIN1-46_AINNL0046	>13110		Active	111.81	13110	40	>13110		Inactive	91.65	1.319	104.89	13110	20
AB01974201	01	Ainno_16251	Ainnocence	AIN1-27_AINNL0027	>1440		Inactive	2.43	0.04583	40	>1440		Inactive	91.12	45.64	102.43	1440	20
AB01974204	01	Ainno_16251	Ainnocence	AIN1-37_AINNL0037	>2110		Inactive	2.08	2.138e-06	40	>2110		Inactive	90.47	2.134e-05	116.24	21.16	20
AB01974203	01	Ainno_16251	Ainnocence	AIN1-35_AINNL0035	>2330		Inactive	2.11	0.00235	40	>2330		Inactive	95.17	0.02347	102	73.84	20
AB01974202	01	Ainno_16251	Ainnocence	AIN1-34_AINNL0034	>2560		Inactive	2.44	8.183e-05	40	>2560		Inactive	89.79	8.207e-07	102.51	810.1	20
AB01974197	01	Ainno_16251	Ainnocence	AIN1-23_AINNL0023	>3440		Inactive	10.1	0.001098	40	>3440		Inactive	95.9	0.01096	107	10.92	20
AB01974195	01	Ainno_16251	Ainnocence	AIN1-12_AINNL0012	>41220		Inactive	1.43	41.4	40	>41220		Inactive	96.14	4.176e-05	107.61	1.312	20
AB01974196	01	Ainno_16251	Ainnocence	AIN1-20_AINNL0020	>45220		Inactive	1.71	1.439	40	>45220		Inactive	94.6	0.0001448	113.03	45.42	20
AB01974183	01	Ainno_16251	Ainnocence	AIN1-2_AINNL0002	>4780		Inactive	1.11	0.01524	40	>4780		Inactive	91.48	0.01524	103.44	4780	20
AB01974192	01	Ainno_16251	Ainnocence	AIN1-11_AINNL0011	>5440		Inactive	4.45	1722	40	>5440		Inactive	92.81	5.503e-05	103.7	0.1731	20
AB01974184	01	Ainno_16251	Ainnocence	AIN1-4_AINNL0004	>5670		Inactive	2.04	0.01807	40	>5670		Inactive	93.92	5.736e-05	107.82	0.1805	20
AB01974200	01	Ainno_16251	Ainnocence	AIN1-25_AINNL0025	>7670		Inactive	2.54	2.459e-06	40	>7670		Inactive	95.19	0.007737	107.32	2.455e-05	20
AB01974176	01	Ainno_16251	Ainnocence	AIN1-30_AINNL0030	>8670		Inactive	2.49	0.276	40	>8670		Inactive	92.3	2.775e-05	104.11	8.708	20
AB01974180	01	Ainno_16251	Ainnocence	AIN1-36_AINNL0036	>9440		Inactive	2.17	945.4	40	>9440		Inactive	100.35	3.026e-06	113.45	0.03009	20
AB01974174	01	Ainno_16251	Ainnocence	AIN1-28_AINNL0028	>9670		Inactive	5.49	0.3078	40	>9670		Inactive	92.18	3.1e-06	103.7	0.003087	20

## Sheet: Batch Ctrl (MS)
Plate	Z Analysis	Avg Cell Ctrl	StDev Cell Ctrl	CV Cell Ctrl	Avg Virus Ctrl	StDev Virus Ctrl	CV Virus Ctrl	Testset ID
TC00820831	0.61	60537.5	7076	11.69	2200	483	21.95	20220127_SR2DLT_Ab
TC00820832	0.82	73810.9	3878	5.25	2667.19	452	16.95	20220127_SR2DLT_Ab
TC00820834	0.82	75232.8	3910	5.2	2571.88	502	19.5	20220127_SR2DLT_Ab
TC00820835	0.85	75226.6	3169	4.21	2668.75	517	19.38	20220127_SR2DLT_Ab
TC00820837	0.85	72504.7	3036	4.19	2546.09	483	18.98	20220127_SR2DLT_Ab
TC00820838	0.85	75856.2	3127	4.12	2904.69	400	13.76	20220127_SR2DLT_Ab
TC00820840	0.85	73077.3	3168	4.34	2247.66	395	17.57	20220127_SR2DLT_Ab
TC00820841	0.86	73290.6	2915	3.98	2316.41	449	19.37	20220127_SR2DLT_Ab

## Sheet: Batch Ctrl (TOX)
Plate	Z Analysis	Avg Cell Ctrl	StDev Cell Ctrl	CV Cell Ctrl	Avg Pos Ctrl	StDev Pos Ctrl	CV Pos Ctrl	Testset ID
TC00820833	0.92	45875	1181	2.57	57.0312	27	46.86	20220127_SR2DTOX_Ab
TC00820836	0.92	46066.1	1157	2.51	59.8438	24	39.27	20220127_SR2DTOX_Ab
TC00820839	0.92	45840.5	1223	2.67	52.5	25	47.65	20220127_SR2DTOX_Ab
TC00820842	0.89	59405.8	2113	3.56	69.375	28	40.72	20220127_SR2DTOX_Ab

## Sheet: Notes
	Abase testset ID:	20220127_SR2DLT_Ab
		20220127_SR2DTOX_Ab
