# Supplementary material for: AI Designed, Mutation Resistant Broad Neutralizing Antibodies Against Multiple SARS-CoV-2 Strains
Source: Research Square preprint supplement (doi:10.21203/rs.3.rs-5184292/v1), 2025-03-27
Supplement: Supplementary file 28 [file S4d_2022-0127_SARS2_Delta_REF_Report.xlsx]

## Sheet: Cmpds DR Graph
Compound ID	Batch	Library	Supplier	Supplier Id	Main screen, IC50 (uM)	Main screen, Graph	Main screen, Activity Status	Main screen, Max % Inhibition	Main screen, Conc @ Max % Inhibition	Main screen, Number Included Points	TOX, CC50 (uM)	TOX, Graph	TOX, Activity Status	TOX, Min % Viability	TOX, Conc @ Min % Viability	TOX, Max % Viability	TOX, Conc @ Max % Viability	TOX, Number Included Points
AB00053436	10	SARS2_REF	SRI Repository	Chloroquine	2.342		Active	136.5	7.5	10	>30.00		Inactive	96.17	3.75	109.85	30	10
AB01952209	04	SARS2_REF	Selleck	Remdesivir	10.354		Active	93.75	15	10	>30.00		Inactive	97.42	0.117	103.53	15	10
AB01955411	01	SARS2_REF	Selleck	E64d (Aloxistatin)	>30.00		Inactive	20.97	30	10	>30.00		Inactive	81.78	7.5	105.52	0.059	10
AB01968659	01	SARS2_REF	Sigma	CalpainInhibitorIV	0.27		Active	105.93	1.79	10	>7.170		Inactive	100.51	0.056	109.15	0.028	10
AB01973773	01	SARS2_REF	Pfizer	PF-07321332+EI	0.065		Active	140.84	0.125	10	>1.000		Inactive	95.85	0.002	107.38	0.5	10
AB01973774	01	SARS2_REF	Pfizer	PF-07321332	2.691		Active	135.06	5	10	>10.00		Inactive	97.99	2.5	112.25	10	10
AB01973775	01	SARS2_REF	Selleck	Molnupiravir	>10.00		Inactive	13.41	10	10	>10.00		Inactive	85.09	0.0137	103.28	0.123	10

## Sheet: Cmpds DR Data (MS)
Compound ID	Batch	Library	Supplier	Supplier ID	Supplier Batch	Plate ID	Well Ref	Assay Conc	Assay Conc Unit	Data Value	% Inhibition	IC50 (uM)	Activity Status	Curve Fit Hill Slope	Curve Fit Norm Chi2	Curve Fit StDev	Number Included Points	Test ID
AB01968659	01	SARS2_REF	Sigma	CalpainInhibitorIV	CalpainInhibitorIV	TC00820829	B003	7.17	uM	56850	82.5	0.27	Active	4.42	8.21	0.02	10	20220127_SR2DLT_REF
AB01968659	01	SARS2_REF	Sigma	CalpainInhibitorIV	CalpainInhibitorIV	TC00820829	B004	3.59	uM	60800	88.63							20220127_SR2DLT_REF
AB01968659	01	SARS2_REF	Sigma	CalpainInhibitorIV	CalpainInhibitorIV	TC00820829	B005	1.79	uM	71950	105.93							20220127_SR2DLT_REF
AB01968659	01	SARS2_REF	Sigma	CalpainInhibitorIV	CalpainInhibitorIV	TC00820829	B006	0.896	uM	70725	104.03							20220127_SR2DLT_REF
AB01968659	01	SARS2_REF	Sigma	CalpainInhibitorIV	CalpainInhibitorIV	TC00820829	B007	0.448	uM	62450	91.19							20220127_SR2DLT_REF
AB01968659	01	SARS2_REF	Sigma	CalpainInhibitorIV	CalpainInhibitorIV	TC00820829	B008	0.224	uM	22675	29.47							20220127_SR2DLT_REF
AB01968659	01	SARS2_REF	Sigma	CalpainInhibitorIV	CalpainInhibitorIV	TC00820829	B009	0.112	uM	8825	7.98							20220127_SR2DLT_REF
AB01968659	01	SARS2_REF	Sigma	CalpainInhibitorIV	CalpainInhibitorIV	TC00820829	B010	0.056	uM	4725	1.61							20220127_SR2DLT_REF
AB01968659	01	SARS2_REF	Sigma	CalpainInhibitorIV	CalpainInhibitorIV	TC00820829	B011	0.028	uM	5300	2.51							20220127_SR2DLT_REF
AB01968659	01	SARS2_REF	Sigma	CalpainInhibitorIV	CalpainInhibitorIV	TC00820829	B012	0.014	uM	4425	1.15							20220127_SR2DLT_REF
AB00053436	10	SARS2_REF	SRI Repository	Chloroquine	SRI-00015594	TC00820829	C003	30	uM	67450	98.94	2.342	Active	28.89	15.81	3295.18	10	20220127_SR2DLT_REF
AB00053436	10	SARS2_REF	SRI Repository	Chloroquine	SRI-00015594	TC00820829	C004	15	uM	75925	112.09							20220127_SR2DLT_REF
AB00053436	10	SARS2_REF	SRI Repository	Chloroquine	SRI-00015594	TC00820829	C005	7.5	uM	91650	136.5							20220127_SR2DLT_REF
AB00053436	10	SARS2_REF	SRI Repository	Chloroquine	SRI-00015594	TC00820829	C006	3.75	uM	82775	122.72							20220127_SR2DLT_REF
AB00053436	10	SARS2_REF	SRI Repository	Chloroquine	SRI-00015594	TC00820829	C007	1.875	uM	3775	0.14							20220127_SR2DLT_REF
AB00053436	10	SARS2_REF	SRI Repository	Chloroquine	SRI-00015594	TC00820829	C008	0.938	uM	4675	1.54							20220127_SR2DLT_REF
AB00053436	10	SARS2_REF	SRI Repository	Chloroquine	SRI-00015594	TC00820829	C009	0.469	uM	4150	0.72							20220127_SR2DLT_REF
AB00053436	10	SARS2_REF	SRI Repository	Chloroquine	SRI-00015594	TC00820829	C010	0.234	uM	3300	-0.6							20220127_SR2DLT_REF
AB00053436	10	SARS2_REF	SRI Repository	Chloroquine	SRI-00015594	TC00820829	C011	0.117	uM	3800	0.18							20220127_SR2DLT_REF
AB00053436	10	SARS2_REF	SRI Repository	Chloroquine	SRI-00015594	TC00820829	C012	0.059	uM	4375	1.07							20220127_SR2DLT_REF
AB01973774	01	SARS2_REF	Pfizer	PF-07321332	PF-07321332	TC00820829	C013	10	uM	69425	102.01	2.691	Active	20.93	12.78	744.5	10	20220127_SR2DLT_REF
AB01973774	01	SARS2_REF	Pfizer	PF-07321332	PF-07321332	TC00820829	C014	5	uM	90725	135.06							20220127_SR2DLT_REF
AB01973774	01	SARS2_REF	Pfizer	PF-07321332	PF-07321332	TC00820829	C015	2.5	uM	15025	17.6							20220127_SR2DLT_REF
AB01973774	01	SARS2_REF	Pfizer	PF-07321332	PF-07321332	TC00820829	C016	1.25	uM	8500	7.47							20220127_SR2DLT_REF
AB01973774	01	SARS2_REF	Pfizer	PF-07321332	PF-07321332	TC00820829	C017	0.625	uM	5800	3.28							20220127_SR2DLT_REF
AB01973774	01	SARS2_REF	Pfizer	PF-07321332	PF-07321332	TC00820829	C018	0.313	uM	3850	0.26							20220127_SR2DLT_REF
AB01973774	01	SARS2_REF	Pfizer	PF-07321332	PF-07321332	TC00820829	C019	0.156	uM	3475	-0.33							20220127_SR2DLT_REF
AB01973774	01	SARS2_REF	Pfizer	PF-07321332	PF-07321332	TC00820829	C020	0.078	uM	3250	-0.68							20220127_SR2DLT_REF
AB01973774	01	SARS2_REF	Pfizer	PF-07321332	PF-07321332	TC00820829	C021	0.039	uM	5250	2.43							20220127_SR2DLT_REF
AB01973774	01	SARS2_REF	Pfizer	PF-07321332	PF-07321332	TC00820829	C022	0.0195	uM	4025	0.53							20220127_SR2DLT_REF
AB01973773	01	SARS2_REF	Pfizer	PF-07321332+EI	Cmpd+PF-EI6-2uM	TC00820829	D013	1	uM	66275	97.12	0.065	Active	20.06	14.96	16.07	10	20220127_SR2DLT_REF
AB01973773	01	SARS2_REF	Pfizer	PF-07321332+EI	Cmpd+PF-EI6-2uM	TC00820829	D014	0.5	uM	66050	96.77							20220127_SR2DLT_REF
AB01973773	01	SARS2_REF	Pfizer	PF-07321332+EI	Cmpd+PF-EI6-2uM	TC00820829	D015	0.25	uM	68625	100.77							20220127_SR2DLT_REF
AB01973773	01	SARS2_REF	Pfizer	PF-07321332+EI	Cmpd+PF-EI6-2uM	TC00820829	D016	0.125	uM	94450	140.84							20220127_SR2DLT_REF
AB01973773	01	SARS2_REF	Pfizer	PF-07321332+EI	Cmpd+PF-EI6-2uM	TC00820829	D017	0.062	uM	21100	27.02							20220127_SR2DLT_REF
AB01973773	01	SARS2_REF	Pfizer	PF-07321332+EI	Cmpd+PF-EI6-2uM	TC00820829	D018	0.031	uM	9625	9.22							20220127_SR2DLT_REF
AB01973773	01	SARS2_REF	Pfizer	PF-07321332+EI	Cmpd+PF-EI6-2uM	TC00820829	D019	0.016	uM	6350	4.14							20220127_SR2DLT_REF
AB01973773	01	SARS2_REF	Pfizer	PF-07321332+EI	Cmpd+PF-EI6-2uM	TC00820829	D020	0.008	uM	2900	-1.22							20220127_SR2DLT_REF
AB01973773	01	SARS2_REF	Pfizer	PF-07321332+EI	Cmpd+PF-EI6-2uM	TC00820829	D021	0.004	uM	3250	-0.68							20220127_SR2DLT_REF
AB01973773	01	SARS2_REF	Pfizer	PF-07321332+EI	Cmpd+PF-EI6-2uM	TC00820829	D022	0.002	uM	3700	0.02							20220127_SR2DLT_REF
AB01952209	04	SARS2_REF	Selleck	Remdesivir	Remdesivir	TC00820829	E003	30	uM	60650	88.39	10.354	Active	7.21	4.64	0.68	10	20220127_SR2DLT_REF
AB01952209	04	SARS2_REF	Selleck	Remdesivir	Remdesivir	TC00820829	E004	15	uM	64100	93.75							20220127_SR2DLT_REF
AB01952209	04	SARS2_REF	Selleck	Remdesivir	Remdesivir	TC00820829	E005	7.5	uM	9350	8.79							20220127_SR2DLT_REF
AB01952209	04	SARS2_REF	Selleck	Remdesivir	Remdesivir	TC00820829	E006	3.75	uM	6150	3.82							20220127_SR2DLT_REF
AB01952209	04	SARS2_REF	Selleck	Remdesivir	Remdesivir	TC00820829	E007	1.875	uM	2850	-1.3							20220127_SR2DLT_REF
AB01952209	04	SARS2_REF	Selleck	Remdesivir	Remdesivir	TC00820829	E008	0.938	uM	6600	4.52							20220127_SR2DLT_REF
AB01952209	04	SARS2_REF	Selleck	Remdesivir	Remdesivir	TC00820829	E009	0.469	uM	4150	0.72							20220127_SR2DLT_REF
AB01952209	04	SARS2_REF	Selleck	Remdesivir	Remdesivir	TC00820829	E010	0.234	uM	3575	-0.17							20220127_SR2DLT_REF
AB01952209	04	SARS2_REF	Selleck	Remdesivir	Remdesivir	TC00820829	E011	0.117	uM	4500	1.26							20220127_SR2DLT_REF
AB01952209	04	SARS2_REF	Selleck	Remdesivir	Remdesivir	TC00820829	E012	0.059	uM	3900	0.33							20220127_SR2DLT_REF
AB01955411	01	SARS2_REF	Selleck	E64d (Aloxistatin)	E64d (Aloxistatin)	TC00820829	F003	30	uM	17200	20.97	>30.00	Inactive	0.93	1.98	39.71	10	20220127_SR2DLT_REF
AB01955411	01	SARS2_REF	Selleck	E64d (Aloxistatin)	E64d (Aloxistatin)	TC00820829	F004	15	uM	12075	13.02							20220127_SR2DLT_REF
AB01955411	01	SARS2_REF	Selleck	E64d (Aloxistatin)	E64d (Aloxistatin)	TC00820829	F005	7.5	uM	7900	6.54							20220127_SR2DLT_REF
AB01955411	01	SARS2_REF	Selleck	E64d (Aloxistatin)	E64d (Aloxistatin)	TC00820829	F006	3.75	uM	3800	0.18							20220127_SR2DLT_REF
AB01955411	01	SARS2_REF	Selleck	E64d (Aloxistatin)	E64d (Aloxistatin)	TC00820829	F007	1.875	uM	7650	6.15							20220127_SR2DLT_REF
AB01955411	01	SARS2_REF	Selleck	E64d (Aloxistatin)	E64d (Aloxistatin)	TC00820829	F008	0.938	uM	4525	1.3							20220127_SR2DLT_REF
AB01955411	01	SARS2_REF	Selleck	E64d (Aloxistatin)	E64d (Aloxistatin)	TC00820829	F009	0.469	uM	4125	0.68							20220127_SR2DLT_REF
AB01955411	01	SARS2_REF	Selleck	E64d (Aloxistatin)	E64d (Aloxistatin)	TC00820829	F010	0.234	uM	4375	1.07							20220127_SR2DLT_REF
AB01955411	01	SARS2_REF	Selleck	E64d (Aloxistatin)	E64d (Aloxistatin)	TC00820829	F011	0.117	uM	3500	-0.29							20220127_SR2DLT_REF
AB01955411	01	SARS2_REF	Selleck	E64d (Aloxistatin)	E64d (Aloxistatin)	TC00820829	F012	0.059	uM	3825	0.22							20220127_SR2DLT_REF
AB01973775	01	SARS2_REF	Selleck	Molnupiravir	S8969	TC00820829	G013	10	uM	12325	13.41	>10.00	Inactive	8.36	1.39	268.47	10	20220127_SR2DLT_REF
AB01973775	01	SARS2_REF	Selleck	Molnupiravir	S8969	TC00820829	G014	3.33	uM	3350	-0.52							20220127_SR2DLT_REF
AB01973775	01	SARS2_REF	Selleck	Molnupiravir	S8969	TC00820829	G015	1.11	uM	3950	0.41							20220127_SR2DLT_REF
AB01973775	01	SARS2_REF	Selleck	Molnupiravir	S8969	TC00820829	G016	0.37	uM	2675	-1.57							20220127_SR2DLT_REF
AB01973775	01	SARS2_REF	Selleck	Molnupiravir	S8969	TC00820829	G017	0.123	uM	4850	1.81							20220127_SR2DLT_REF
AB01973775	01	SARS2_REF	Selleck	Molnupiravir	S8969	TC00820829	G018	0.0412	uM	5025	2.08							20220127_SR2DLT_REF
AB01973775	01	SARS2_REF	Selleck	Molnupiravir	S8969	TC00820829	G019	0.0137	uM	3525	-0.25							20220127_SR2DLT_REF
AB01973775	01	SARS2_REF	Selleck	Molnupiravir	S8969	TC00820829	G020	0.0046	uM	3475	-0.33							20220127_SR2DLT_REF
AB01973775	01	SARS2_REF	Selleck	Molnupiravir	S8969	TC00820829	G021	0.0015	uM	2275	-2.19							20220127_SR2DLT_REF
AB01973775	01	SARS2_REF	Selleck	Molnupiravir	S8969	TC00820829	G022	0.0005	uM	3575	-0.17							20220127_SR2DLT_REF

## Sheet: Cmpds DR Data (TOX)
Compound ID	Batch	Library	Supplier	Supplier ID	Supplier Batch	Plate ID	Well Ref	Assay Conc	Assay Conc Unit	Data Value	% Viability	CC50 (uM)	Activity Status	Curve Fit Hill Slope	Curve Fit Norm Chi2	Curve Fit StDev	Number Included Points	Test ID
AB01968659	01	SARS2_REF	Sigma	CalpainInhibitorIV	CalpainInhibitorIV	TC00820830	B003	7.17	uM	52705	104.24	>7.17	Inactive	2.44			10	20220127_SR2DTOX_REF
AB01968659	01	SARS2_REF	Sigma	CalpainInhibitorIV	CalpainInhibitorIV	TC00820830	B004	3.59	uM	54535	107.86							20220127_SR2DTOX_REF
AB01968659	01	SARS2_REF	Sigma	CalpainInhibitorIV	CalpainInhibitorIV	TC00820830	B005	1.79	uM	54195	107.19							20220127_SR2DTOX_REF
AB01968659	01	SARS2_REF	Sigma	CalpainInhibitorIV	CalpainInhibitorIV	TC00820830	B006	0.896	uM	52095	103.03							20220127_SR2DTOX_REF
AB01968659	01	SARS2_REF	Sigma	CalpainInhibitorIV	CalpainInhibitorIV	TC00820830	B007	0.448	uM	53955	106.71							20220127_SR2DTOX_REF
AB01968659	01	SARS2_REF	Sigma	CalpainInhibitorIV	CalpainInhibitorIV	TC00820830	B008	0.224	uM	51925	102.69							20220127_SR2DTOX_REF
AB01968659	01	SARS2_REF	Sigma	CalpainInhibitorIV	CalpainInhibitorIV	TC00820830	B009	0.112	uM	51545	101.94							20220127_SR2DTOX_REF
AB01968659	01	SARS2_REF	Sigma	CalpainInhibitorIV	CalpainInhibitorIV	TC00820830	B010	0.056	uM	50825	100.51							20220127_SR2DTOX_REF
AB01968659	01	SARS2_REF	Sigma	CalpainInhibitorIV	CalpainInhibitorIV	TC00820830	B011	0.028	uM	55185	109.15							20220127_SR2DTOX_REF
AB01968659	01	SARS2_REF	Sigma	CalpainInhibitorIV	CalpainInhibitorIV	TC00820830	B012	0.014	uM	53810	106.42							20220127_SR2DTOX_REF
AB00053436	10	SARS2_REF	SRI Repository	Chloroquine	SRI-00015594	TC00820830	C003	30	uM	55540	109.85	>30.00	Inactive	1.8			10	20220127_SR2DTOX_REF
AB00053436	10	SARS2_REF	SRI Repository	Chloroquine	SRI-00015594	TC00820830	C004	15	uM	49645	98.18							20220127_SR2DTOX_REF
AB00053436	10	SARS2_REF	SRI Repository	Chloroquine	SRI-00015594	TC00820830	C005	7.5	uM	51710	102.27							20220127_SR2DTOX_REF
AB00053436	10	SARS2_REF	SRI Repository	Chloroquine	SRI-00015594	TC00820830	C006	3.75	uM	48630	96.17							20220127_SR2DTOX_REF
AB00053436	10	SARS2_REF	SRI Repository	Chloroquine	SRI-00015594	TC00820830	C007	1.875	uM	49625	98.14							20220127_SR2DTOX_REF
AB00053436	10	SARS2_REF	SRI Repository	Chloroquine	SRI-00015594	TC00820830	C008	0.938	uM	48755	96.42							20220127_SR2DTOX_REF
AB00053436	10	SARS2_REF	SRI Repository	Chloroquine	SRI-00015594	TC00820830	C009	0.469	uM	53710	106.23							20220127_SR2DTOX_REF
AB00053436	10	SARS2_REF	SRI Repository	Chloroquine	SRI-00015594	TC00820830	C010	0.234	uM	53050	104.92							20220127_SR2DTOX_REF
AB00053436	10	SARS2_REF	SRI Repository	Chloroquine	SRI-00015594	TC00820830	C011	0.117	uM	53980	106.76							20220127_SR2DTOX_REF
AB00053436	10	SARS2_REF	SRI Repository	Chloroquine	SRI-00015594	TC00820830	C012	0.059	uM	53270	105.36							20220127_SR2DTOX_REF
AB01973774	01	SARS2_REF	Pfizer	PF-07321332	PF-07321332	TC00820830	C013	10	uM	56750	112.25	>10.00	Inactive	5.86			10	20220127_SR2DTOX_REF
AB01973774	01	SARS2_REF	Pfizer	PF-07321332	PF-07321332	TC00820830	C014	5	uM	51915	102.67							20220127_SR2DTOX_REF
AB01973774	01	SARS2_REF	Pfizer	PF-07321332	PF-07321332	TC00820830	C015	2.5	uM	49550	97.99							20220127_SR2DTOX_REF
AB01973774	01	SARS2_REF	Pfizer	PF-07321332	PF-07321332	TC00820830	C016	1.25	uM	52825	104.47							20220127_SR2DTOX_REF
AB01973774	01	SARS2_REF	Pfizer	PF-07321332	PF-07321332	TC00820830	C017	0.625	uM	53255	105.33							20220127_SR2DTOX_REF
AB01973774	01	SARS2_REF	Pfizer	PF-07321332	PF-07321332	TC00820830	C018	0.313	uM	51335	101.52							20220127_SR2DTOX_REF
AB01973774	01	SARS2_REF	Pfizer	PF-07321332	PF-07321332	TC00820830	C019	0.156	uM	49835	98.55							20220127_SR2DTOX_REF
AB01973774	01	SARS2_REF	Pfizer	PF-07321332	PF-07321332	TC00820830	C020	0.078	uM	50360	99.59							20220127_SR2DTOX_REF
AB01973774	01	SARS2_REF	Pfizer	PF-07321332	PF-07321332	TC00820830	C021	0.039	uM	52135	103.11							20220127_SR2DTOX_REF
AB01973774	01	SARS2_REF	Pfizer	PF-07321332	PF-07321332	TC00820830	C022	0.0195	uM	50255	99.39							20220127_SR2DTOX_REF
AB01973773	01	SARS2_REF	Pfizer	PF-07321332+EI	Cmpd+PF-EI6-2uM	TC00820830	D013	1	uM	49410	97.71	>1.00	Inactive	10.37			10	20220127_SR2DTOX_REF
AB01973773	01	SARS2_REF	Pfizer	PF-07321332+EI	Cmpd+PF-EI6-2uM	TC00820830	D014	0.5	uM	54295	107.38							20220127_SR2DTOX_REF
AB01973773	01	SARS2_REF	Pfizer	PF-07321332+EI	Cmpd+PF-EI6-2uM	TC00820830	D015	0.25	uM	50450	99.77							20220127_SR2DTOX_REF
AB01973773	01	SARS2_REF	Pfizer	PF-07321332+EI	Cmpd+PF-EI6-2uM	TC00820830	D016	0.125	uM	51365	101.58							20220127_SR2DTOX_REF
AB01973773	01	SARS2_REF	Pfizer	PF-07321332+EI	Cmpd+PF-EI6-2uM	TC00820830	D017	0.062	uM	51965	102.77							20220127_SR2DTOX_REF
AB01973773	01	SARS2_REF	Pfizer	PF-07321332+EI	Cmpd+PF-EI6-2uM	TC00820830	D018	0.031	uM	51475	101.8							20220127_SR2DTOX_REF
AB01973773	01	SARS2_REF	Pfizer	PF-07321332+EI	Cmpd+PF-EI6-2uM	TC00820830	D019	0.016	uM	49180	97.26							20220127_SR2DTOX_REF
AB01973773	01	SARS2_REF	Pfizer	PF-07321332+EI	Cmpd+PF-EI6-2uM	TC00820830	D020	0.008	uM	51080	101.02							20220127_SR2DTOX_REF
AB01973773	01	SARS2_REF	Pfizer	PF-07321332+EI	Cmpd+PF-EI6-2uM	TC00820830	D021	0.004	uM	51280	101.41							20220127_SR2DTOX_REF
AB01973773	01	SARS2_REF	Pfizer	PF-07321332+EI	Cmpd+PF-EI6-2uM	TC00820830	D022	0.002	uM	48470	95.85							20220127_SR2DTOX_REF
AB01952209	04	SARS2_REF	Selleck	Remdesivir	Remdesivir	TC00820830	E003	30	uM	52080	103	>30.00	Inactive	0.42			10	20220127_SR2DTOX_REF
AB01952209	04	SARS2_REF	Selleck	Remdesivir	Remdesivir	TC00820830	E004	15	uM	52350	103.53							20220127_SR2DTOX_REF
AB01952209	04	SARS2_REF	Selleck	Remdesivir	Remdesivir	TC00820830	E005	7.5	uM	50280	99.43							20220127_SR2DTOX_REF
AB01952209	04	SARS2_REF	Selleck	Remdesivir	Remdesivir	TC00820830	E006	3.75	uM	50755	100.38							20220127_SR2DTOX_REF
AB01952209	04	SARS2_REF	Selleck	Remdesivir	Remdesivir	TC00820830	E007	1.875	uM	49690	98.27							20220127_SR2DTOX_REF
AB01952209	04	SARS2_REF	Selleck	Remdesivir	Remdesivir	TC00820830	E008	0.938	uM	50225	99.33							20220127_SR2DTOX_REF
AB01952209	04	SARS2_REF	Selleck	Remdesivir	Remdesivir	TC00820830	E009	0.469	uM	49590	98.07							20220127_SR2DTOX_REF
AB01952209	04	SARS2_REF	Selleck	Remdesivir	Remdesivir	TC00820830	E010	0.234	uM	50430	99.73							20220127_SR2DTOX_REF
AB01952209	04	SARS2_REF	Selleck	Remdesivir	Remdesivir	TC00820830	E011	0.117	uM	49265	97.42							20220127_SR2DTOX_REF
AB01952209	04	SARS2_REF	Selleck	Remdesivir	Remdesivir	TC00820830	E012	0.059	uM	50915	100.69							20220127_SR2DTOX_REF
AB01955411	01	SARS2_REF	Selleck	E64d (Aloxistatin)	E64d (Aloxistatin)	TC00820830	F003	30	uM	49355	97.6	>30.00	Inactive	-0.34			10	20220127_SR2DTOX_REF
AB01955411	01	SARS2_REF	Selleck	E64d (Aloxistatin)	E64d (Aloxistatin)	TC00820830	F004	15	uM	42795	84.61							20220127_SR2DTOX_REF
AB01955411	01	SARS2_REF	Selleck	E64d (Aloxistatin)	E64d (Aloxistatin)	TC00820830	F005	7.5	uM	41365	81.78							20220127_SR2DTOX_REF
AB01955411	01	SARS2_REF	Selleck	E64d (Aloxistatin)	E64d (Aloxistatin)	TC00820830	F006	3.75	uM	49830	98.54							20220127_SR2DTOX_REF
AB01955411	01	SARS2_REF	Selleck	E64d (Aloxistatin)	E64d (Aloxistatin)	TC00820830	F007	1.875	uM	49555	98							20220127_SR2DTOX_REF
AB01955411	01	SARS2_REF	Selleck	E64d (Aloxistatin)	E64d (Aloxistatin)	TC00820830	F008	0.938	uM	51310	101.47							20220127_SR2DTOX_REF
AB01955411	01	SARS2_REF	Selleck	E64d (Aloxistatin)	E64d (Aloxistatin)	TC00820830	F009	0.469	uM	47000	92.94							20220127_SR2DTOX_REF
AB01955411	01	SARS2_REF	Selleck	E64d (Aloxistatin)	E64d (Aloxistatin)	TC00820830	F010	0.234	uM	48135	95.19							20220127_SR2DTOX_REF
AB01955411	01	SARS2_REF	Selleck	E64d (Aloxistatin)	E64d (Aloxistatin)	TC00820830	F011	0.117	uM	50380	99.63							20220127_SR2DTOX_REF
AB01955411	01	SARS2_REF	Selleck	E64d (Aloxistatin)	E64d (Aloxistatin)	TC00820830	F012	0.059	uM	53355	105.52							20220127_SR2DTOX_REF
AB01973775	01	SARS2_REF	Selleck	Molnupiravir	S8969	TC00820830	G013	10	uM	52195	103.23	>10.00	Inactive	0.14			10	20220127_SR2DTOX_REF
AB01973775	01	SARS2_REF	Selleck	Molnupiravir	S8969	TC00820830	G014	3.33	uM	48230	95.38							20220127_SR2DTOX_REF
AB01973775	01	SARS2_REF	Selleck	Molnupiravir	S8969	TC00820830	G015	1.11	uM	49020	96.94							20220127_SR2DTOX_REF
AB01973775	01	SARS2_REF	Selleck	Molnupiravir	S8969	TC00820830	G016	0.37	uM	46115	91.19							20220127_SR2DTOX_REF
AB01973775	01	SARS2_REF	Selleck	Molnupiravir	S8969	TC00820830	G017	0.123	uM	52220	103.28							20220127_SR2DTOX_REF
AB01973775	01	SARS2_REF	Selleck	Molnupiravir	S8969	TC00820830	G018	0.0412	uM	48950	96.8							20220127_SR2DTOX_REF
AB01973775	01	SARS2_REF	Selleck	Molnupiravir	S8969	TC00820830	G019	0.0137	uM	43035	85.09							20220127_SR2DTOX_REF
AB01973775	01	SARS2_REF	Selleck	Molnupiravir	S8969	TC00820830	G020	0.0046	uM	49295	97.48							20220127_SR2DTOX_REF
AB01973775	01	SARS2_REF	Selleck	Molnupiravir	S8969	TC00820830	G021	0.0015	uM	46660	92.27							20220127_SR2DTOX_REF
AB01973775	01	SARS2_REF	Selleck	Molnupiravir	S8969	TC00820830	G022	0.0005	uM	47525	93.98							20220127_SR2DTOX_REF

## Sheet: Ctrl Wells (MS)
Object ID	Batch	Plate	Well	Data value	% Inhibition	Testset ID
Cell Control	01	TC00820829	A001	70625	103.87	20220127_SR2DLT_REF
Cell Control	01	TC00820829	A002	71600	105.38	20220127_SR2DLT_REF
Cell Control	01	TC00820829	B001	61550	89.79	20220127_SR2DLT_REF
Cell Control	01	TC00820829	B002	61925	90.37	20220127_SR2DLT_REF
Cell Control	01	TC00820829	C001	64375	94.17	20220127_SR2DLT_REF
Cell Control	01	TC00820829	C002	59475	86.57	20220127_SR2DLT_REF
Cell Control	01	TC00820829	D001	69850	102.67	20220127_SR2DLT_REF
Cell Control	01	TC00820829	D002	70700	103.99	20220127_SR2DLT_REF
Cell Control	01	TC00820829	E001	68125	99.99	20220127_SR2DLT_REF
Cell Control	01	TC00820829	E002	55500	80.4	20220127_SR2DLT_REF
Cell Control	01	TC00820829	F001	62475	91.22	20220127_SR2DLT_REF
Cell Control	01	TC00820829	F002	62425	91.15	20220127_SR2DLT_REF
Cell Control	01	TC00820829	G001	73850	108.88	20220127_SR2DLT_REF
Cell Control	01	TC00820829	G002	68425	100.46	20220127_SR2DLT_REF
Cell Control	01	TC00820829	H001	73925	108.99	20220127_SR2DLT_REF
Cell Control	01	TC00820829	H002	71800	105.69	20220127_SR2DLT_REF
Cell Control	01	TC00820829	I001	73050	107.63	20220127_SR2DLT_REF
Cell Control	01	TC00820829	I002	68750	100.96	20220127_SR2DLT_REF
Cell Control	01	TC00820829	J001	67175	98.52	20220127_SR2DLT_REF
Cell Control	01	TC00820829	J002	68275	100.22	20220127_SR2DLT_REF
Cell Control	01	TC00820829	K001	74125	109.3	20220127_SR2DLT_REF
Cell Control	01	TC00820829	K002	71950	105.93	20220127_SR2DLT_REF
Cell Control	01	TC00820829	L001	71275	104.88	20220127_SR2DLT_REF
Cell Control	01	TC00820829	L002	73175	107.83	20220127_SR2DLT_REF
Cell Control	01	TC00820829	M001	63050	92.12	20220127_SR2DLT_REF
Cell Control	01	TC00820829	M002	69025	101.39	20220127_SR2DLT_REF
Cell Control	01	TC00820829	N001	63450	92.74	20220127_SR2DLT_REF
Cell Control	01	TC00820829	N002	68625	100.77	20220127_SR2DLT_REF
Cell Control	01	TC00820829	O001	67150	98.48	20220127_SR2DLT_REF
Cell Control	01	TC00820829	O002	72900	107.4	20220127_SR2DLT_REF
Cell Control	01	TC00820829	P001	69425	102.01	20220127_SR2DLT_REF
Cell Control	01	TC00820829	P002	72150	106.24	20220127_SR2DLT_REF
Virus Control	01	TC00820829	A023	3175	-0.79	20220127_SR2DLT_REF
Virus Control	01	TC00820829	A024	3300	-0.6	20220127_SR2DLT_REF
Virus Control	01	TC00820829	B023	3100	-0.91	20220127_SR2DLT_REF
Virus Control	01	TC00820829	B024	3175	-0.79	20220127_SR2DLT_REF
Virus Control	01	TC00820829	C023	3825	0.22	20220127_SR2DLT_REF
Virus Control	01	TC00820829	C024	3925	0.37	20220127_SR2DLT_REF
Virus Control	01	TC00820829	D023	3725	0.06	20220127_SR2DLT_REF
Virus Control	01	TC00820829	D024	3200	-0.75	20220127_SR2DLT_REF
Virus Control	01	TC00820829	E023	3125	-0.87	20220127_SR2DLT_REF
Virus Control	01	TC00820829	E024	5000	2.04	20220127_SR2DLT_REF
Virus Control	01	TC00820829	F023	4450	1.19	20220127_SR2DLT_REF
Virus Control	01	TC00820829	F024	5175	2.31	20220127_SR2DLT_REF
Virus Control	01	TC00820829	G023	2650	-1.61	20220127_SR2DLT_REF
Virus Control	01	TC00820829	G024	3600	-0.13	20220127_SR2DLT_REF
Virus Control	01	TC00820829	H023	4675	1.54	20220127_SR2DLT_REF
Virus Control	01	TC00820829	H024	3100	-0.91	20220127_SR2DLT_REF
Virus Control	01	TC00820829	I023	3775	0.14	20220127_SR2DLT_REF
Virus Control	01	TC00820829	I024	3125	-0.87	20220127_SR2DLT_REF
Virus Control	01	TC00820829	J023	4025	0.53	20220127_SR2DLT_REF
Virus Control	01	TC00820829	J024	3975	0.45	20220127_SR2DLT_REF
Virus Control	01	TC00820829	K023	4225	0.84	20220127_SR2DLT_REF
Virus Control	01	TC00820829	K024	3400	-0.44	20220127_SR2DLT_REF
Virus Control	01	TC00820829	L023	4375	1.07	20220127_SR2DLT_REF
Virus Control	01	TC00820829	L024	2875	-1.26	20220127_SR2DLT_REF
Virus Control	01	TC00820829	M023	3400	-0.44	20220127_SR2DLT_REF
Virus Control	01	TC00820829	M024	2425	-1.96	20220127_SR2DLT_REF
Virus Control	01	TC00820829	N023	5800	3.28	20220127_SR2DLT_REF
Virus Control	01	TC00820829	N024	3250	-0.68	20220127_SR2DLT_REF
Virus Control	01	TC00820829	O023	4000	0.49	20220127_SR2DLT_REF
Virus Control	01	TC00820829	O024	4025	0.53	20220127_SR2DLT_REF
Virus Control	01	TC00820829	P023	3250	-0.68	20220127_SR2DLT_REF
Virus Control	01	TC00820829	P024	2800	-1.37	20220127_SR2DLT_REF

## Sheet: Ctrl Wells (TOX)
Object ID	Batch	Plate	Well	Lum	% Viability	Testset ID
Cell Control	01	TC00820830	A001	41475	82	20220127_SR2DTOX_REF
Cell Control	01	TC00820830	A002	51290	101.43	20220127_SR2DTOX_REF
Cell Control	01	TC00820830	B001	50915	100.69	20220127_SR2DTOX_REF
Cell Control	01	TC00820830	B002	52190	103.22	20220127_SR2DTOX_REF
Cell Control	01	TC00820830	C001	52930	104.68	20220127_SR2DTOX_REF
Cell Control	01	TC00820830	C002	49830	98.54	20220127_SR2DTOX_REF
Cell Control	01	TC00820830	D001	45000	88.98	20220127_SR2DTOX_REF
Cell Control	01	TC00820830	D002	46115	91.19	20220127_SR2DTOX_REF
Cell Control	01	TC00820830	E001	45745	90.46	20220127_SR2DTOX_REF
Cell Control	01	TC00820830	E002	51770	102.39	20220127_SR2DTOX_REF
Cell Control	01	TC00820830	F001	51165	101.19	20220127_SR2DTOX_REF
Cell Control	01	TC00820830	F002	50835	100.53	20220127_SR2DTOX_REF
Cell Control	01	TC00820830	G001	50010	98.9	20220127_SR2DTOX_REF
Cell Control	01	TC00820830	G002	51515	101.88	20220127_SR2DTOX_REF
Cell Control	01	TC00820830	H001	48480	95.87	20220127_SR2DTOX_REF
Cell Control	01	TC00820830	H002	51935	102.71	20220127_SR2DTOX_REF
Cell Control	01	TC00820830	I001	52605	104.04	20220127_SR2DTOX_REF
Cell Control	01	TC00820830	I002	55225	109.23	20220127_SR2DTOX_REF
Cell Control	01	TC00820830	J001	51935	102.71	20220127_SR2DTOX_REF
Cell Control	01	TC00820830	J002	50600	100.07	20220127_SR2DTOX_REF
Cell Control	01	TC00820830	K001	60785	120.24	20220127_SR2DTOX_REF
Cell Control	01	TC00820830	K002	50305	99.48	20220127_SR2DTOX_REF
Cell Control	01	TC00820830	L001	49540	97.97	20220127_SR2DTOX_REF
Cell Control	01	TC00820830	L002	50705	100.28	20220127_SR2DTOX_REF
Cell Control	01	TC00820830	M001	52605	104.04	20220127_SR2DTOX_REF
Cell Control	01	TC00820830	M002	54515	107.82	20220127_SR2DTOX_REF
Cell Control	01	TC00820830	N001	43340	85.69	20220127_SR2DTOX_REF
Cell Control	01	TC00820830	N002	49105	97.11	20220127_SR2DTOX_REF
Cell Control	01	TC00820830	O001	51550	101.95	20220127_SR2DTOX_REF
Cell Control	01	TC00820830	O002	51505	101.86	20220127_SR2DTOX_REF
Cell Control	01	TC00820830	P001	49140	97.18	20220127_SR2DTOX_REF
Cell Control	01	TC00820830	P002	53435	105.68	20220127_SR2DTOX_REF
PosCtrl	01	TC00820830	A023	60	0	20220127_SR2DTOX_REF
PosCtrl	01	TC00820830	A024	20	-0.08	20220127_SR2DTOX_REF
PosCtrl	01	TC00820830	B023	70	0.02	20220127_SR2DTOX_REF
PosCtrl	01	TC00820830	B024	50	-0.02	20220127_SR2DTOX_REF
PosCtrl	01	TC00820830	C023	105	0.09	20220127_SR2DTOX_REF
PosCtrl	01	TC00820830	C024	30	-0.06	20220127_SR2DTOX_REF
PosCtrl	01	TC00820830	D023	80	0.04	20220127_SR2DTOX_REF
PosCtrl	01	TC00820830	D024	50	-0.02	20220127_SR2DTOX_REF
PosCtrl	01	TC00820830	E023	65	0.01	20220127_SR2DTOX_REF
PosCtrl	01	TC00820830	E024	30	-0.06	20220127_SR2DTOX_REF
PosCtrl	01	TC00820830	F023	85	0.05	20220127_SR2DTOX_REF
PosCtrl	01	TC00820830	F024	25	-0.07	20220127_SR2DTOX_REF
PosCtrl	01	TC00820830	G023	90	0.06	20220127_SR2DTOX_REF
PosCtrl	01	TC00820830	G024	40	-0.04	20220127_SR2DTOX_REF
PosCtrl	01	TC00820830	H023	85	0.05	20220127_SR2DTOX_REF
PosCtrl	01	TC00820830	H024	40	-0.04	20220127_SR2DTOX_REF
PosCtrl	01	TC00820830	I023	80	0.04	20220127_SR2DTOX_REF
PosCtrl	01	TC00820830	I024	55	-0.01	20220127_SR2DTOX_REF
PosCtrl	01	TC00820830	J023	80	0.04	20220127_SR2DTOX_REF
PosCtrl	01	TC00820830	J024	55	-0.01	20220127_SR2DTOX_REF
PosCtrl	01	TC00820830	K023	105	0.09	20220127_SR2DTOX_REF
PosCtrl	01	TC00820830	K024	30	-0.06	20220127_SR2DTOX_REF
PosCtrl	01	TC00820830	L023	105	0.09	20220127_SR2DTOX_REF
PosCtrl	01	TC00820830	L024	40	-0.04	20220127_SR2DTOX_REF
PosCtrl	01	TC00820830	M023	85	0.05	20220127_SR2DTOX_REF
PosCtrl	01	TC00820830	M024	40	-0.04	20220127_SR2DTOX_REF
PosCtrl	01	TC00820830	N023	115	0.1	20220127_SR2DTOX_REF
PosCtrl	01	TC00820830	N024	60	0	20220127_SR2DTOX_REF
PosCtrl	01	TC00820830	O023	100	0.08	20220127_SR2DTOX_REF
PosCtrl	01	TC00820830	O024	30	-0.06	20220127_SR2DTOX_REF
PosCtrl	01	TC00820830	P023	50	-0.02	20220127_SR2DTOX_REF
PosCtrl	01	TC00820830	P024	30	-0.06	20220127_SR2DTOX_REF

## Sheet: Batch Ctrl (MS)
Plate	Z Analysis	Avg Cell Ctrl	StDev Cell Ctrl	CV Cell Ctrl	Avg Virus Ctrl	StDev Virus Ctrl	CV Virus Ctrl	Testset ID
TC00820829	0.74	68130.5	4766	7	3685.16	765	20.75	20220127_SR2DLT_REF

## Sheet: Batch Ctrl (TOX)
Plate	Z Analysis	Avg Cell Ctrl	StDev Cell Ctrl	CV Cell Ctrl	Avg Pos Ctrl	StDev Pos Ctrl	CV Pos Ctrl	Testset ID
TC00820830	0.79	50565.5	3569	7.06	62.0312	28	44.8	20220127_SR2DTOX_REF

## Sheet: Notes
	Abase testset ID:	20220127_SR2DLT_REF
		20220127_SR2DTOX_REF
