# Supplementary material for: AI Designed, Mutation Resistant Broad Neutralizing Antibodies Against Multiple SARS-CoV-2 Strains
Source: Research Square preprint supplement (doi:10.21203/rs.3.rs-5184292/v1), 2025-03-27
Supplement: Supplementary file 31 [file S5a_2022-0328_SARS2_Omi_Ainnocence_AV_Report.xlsx]

## Sheet: Cmpds DR Graphs
Compound ID	Batch	Library	Supplier	Supplier Id	IC50 (ug/mL)	IC90 (ug/mL)	Graph	Activity Status	Max % Inhibition	Conc @ Max % Inhibition	Number Included Points
AB01974161	01	Ainno_16251	Ainnocence	AIN2-1_REGN10933	0.34	0.417		Active	139.59	1	20
AB01974177	01	Ainno_16251	Ainnocence	AIN1-31_AINNL0031	5.473	>9.78		Active	80.56	9.78	20
AB01974201	01	Ainno_16251	Ainnocence	AIN1-27_AINNL0027	>1.44	>1.44		Inactive	6.66	0.144	20
AB01974162	01	Ainno_16251	Ainnocence	AIN2-2_REGN10987	>10.00	>10.00		Inactive	5.44	10	20
AB01974175	01	Ainno_16251	Ainnocence	AIN1-29_AINNL0029	>10.00	>10.00		Inactive	4.6	3.16	20
AB01974172	01	Ainno_16251	Ainnocence	AIN1-22_AINNL0022	>10.22	>10.22		Inactive	4.55	0.0102	20
AB01974178	01	Ainno_16251	Ainnocence	AIN1-32_AINNL0032	>10.22	>10.22		Inactive	11.09	1.02	20
AB01974179	01	Ainno_16251	Ainnocence	AIN1-33_AINNL0033	>10.67	>10.67		Inactive	3.76	0.339	20
AB01974185	01	Ainno_16251	Ainnocence	AIN1-13_AINNL0013	>10.67	>10.67		Inactive	3.64	0.0339	20
AB01974188	01	Ainno_16251	Ainnocence	AIN1-39_AINNL0039	>10.67	>10.67		Inactive	19.31	0.00339	20
AB01974186	01	Ainno_16251	Ainnocence	AIN1-15_AINNL0015	>10.78	>10.78		Inactive	4.77	0.108	20
AB01974189	01	Ainno_16251	Ainnocence	AIN1-40_AINNL0040	>10.78	>10.78		Inactive	4.64	0.00108	20
AB01974600	01	Ainno_16335	Ainnocence	22AIN4-14	>10.78	>10.78		Inactive	6.27	0.342	20
AB01974173	01	Ainno_16251	Ainnocence	AIN1-26_AINNL0026	>10.89	>10.89		Inactive	4.8	10.89	20
AB01974187	01	Ainno_16251	Ainnocence	AIN1-38_AINNL0038	>10.89	>10.89		Inactive	6.85	3.45	20
AB01974190	01	Ainno_16251	Ainnocence	AIN1-41_AINNL0041	>10.89	>10.89		Inactive	8.8	10.89	20
AB01974191	01	Ainno_16251	Ainnocence	AIN1-42_AINNL0042	>10.89	>10.89		Inactive	26.17	10.89	20
AB01974589	01	Ainno_16335	Ainnocence	22AIN4-3	>10.89	>10.89		Inactive	4.23	10.89	20
AB01974171	01	Ainno_16251	Ainnocence	AIN1-21_AINNL0021	>11.00	>11.00		Inactive	9.21	0.348	20
AB01974181	01	Ainno_16251	Ainnocence	AIN1-1_AINNL0001	>11.00	>11.00		Inactive	14.5	3.48	20
AB01974210	01	Ainno_16251	Ainnocence	AIN1-48_AINNL0048	>11.00	>11.00		Inactive	9.46	0.0348	20
AB01974587	01	Ainno_16335	Ainnocence	22AIN4-1	>11.00	>11.00		Inactive	3.75	0.0011	20
AB01974597	01	Ainno_16335	Ainnocence	22AIN4-11	>11.00	>11.00		Inactive	7.19	3.48	20
AB01974598	01	Ainno_16335	Ainnocence	22AIN4-12	>11.00	>11.00		Inactive	4.82	0.348	20
AB01974595	01	Ainno_16335	Ainnocence	22AIN4-9	>11.11	>11.11		Inactive	2.92	0.00111	20
AB01974599	01	Ainno_16335	Ainnocence	22AIN4-13	>11.11	>11.11		Inactive	2.27	0.351	20
AB01974602	01	Ainno_16335	Ainnocence	22AIN4-16	>11.11	>11.11		Inactive	7.22	0.0111	20
AB01974170	01	Ainno_16251	Ainnocence	AIN1-18_AINNL0018	>11.22	>11.22		Inactive	4.56	0.0354	20
AB01974211	01	Ainno_16251	Ainnocence	AIN1-49_AINNL0049	>11.22	>11.22		Inactive	13.07	0.00354	20
AB01974212	01	Ainno_16251	Ainnocence	AIN1-50_AINNL0050	>11.22	>11.22		Inactive	2.09	0.0112	20
AB01974591	01	Ainno_16335	Ainnocence	22AIN4-5	>11.22	>11.22		Inactive	2.7	11.22	20
AB01974594	01	Ainno_16335	Ainnocence	22AIN4-8	>11.22	>11.22		Inactive	4.33	0.0112	20
AB01974590	01	Ainno_16335	Ainnocence	22AIN4-4	>11.33	>11.33		Inactive	4.2	11.33	20
AB01974606	01	Ainno_16335	Ainnocence	22AIN4-20	>11.33	>11.33		Inactive	2.33	11.33	20
AB01974206	01	Ainno_16251	Ainnocence	AIN1-44_AINNL0044	>11.44	>11.44		Inactive	4.36	11.44	20
AB01974207	01	Ainno_16251	Ainnocence	AIN1-45_AINNL0045	>11.44	>11.44		Inactive	1.96	0.364	20
AB01974213	01	Ainno_16251	Ainnocence	AIN1-16_AINNL0016	>11.44	>11.44		Inactive	4.35	0.00364	20
AB01974603	01	Ainno_16335	Ainnocence	22AIN4-17	>11.44	>11.44		Inactive	3.52	0.0364	20
AB01974601	01	Ainno_16335	Ainnocence	22AIN4-15	>11.56	>11.56		Inactive	11.49	0.0116	20
AB01974604	01	Ainno_16335	Ainnocence	22AIN4-18	>11.56	>11.56		Inactive	5.65	0.00116	20
AB01974163	01	Ainno_16251	Ainnocence	AIN1-3_AINNL0003	>11.67	>11.67		Inactive	6.58	3.69	20
AB01974169	01	Ainno_16251	Ainnocence	AIN1-10_AINNL0010	>11.67	>11.67		Inactive	10.76	3.69	20
AB01974198	01	Ainno_16251	Ainnocence	AIN1-19_AINNL0019	>11.67	>11.67		Inactive	4.58	0.00037	20
AB01974164	01	Ainno_16251	Ainnocence	AIN1-5_AINNL0005	>11.78	>11.78		Inactive	3.27	0.00118	20
AB01974165	01	Ainno_16251	Ainnocence	AIN1-6_AINNL0006	>11.78	>11.78		Inactive	4.26	0.0118	20
AB01974166	01	Ainno_16251	Ainnocence	AIN1-7_AINNL0007	>11.78	>11.78		Inactive	2.68	0.00118	20
AB01974167	01	Ainno_16251	Ainnocence	AIN1-8_AINNL0008	>11.78	>11.78		Inactive	2.62	0.000373	20
AB01974194	01	Ainno_16251	Ainnocence	AIN1-17_AINNL0017	>11.78	>11.78		Inactive	7.88	0.373	20
AB01974592	01	Ainno_16335	Ainnocence	22AIN4-6	>11.78	>11.78		Inactive	5.28	0.373	20
AB01974593	01	Ainno_16335	Ainnocence	22AIN4-7	>11.78	>11.78		Inactive	10.39	11.78	20
AB01974193	01	Ainno_16251	Ainnocence	AIN1-14_AINNL0014	>11.89	>11.89		Inactive	8.21	1.19	20
AB01974199	01	Ainno_16251	Ainnocence	AIN1-24_AINNL0024	>12.11	>12.11		Inactive	10.37	0.383	20
AB01974588	01	Ainno_16335	Ainnocence	22AIN4-2	>12.11	>12.11		Inactive	2.64	12.11	20
AB01974168	01	Ainno_16251	Ainnocence	AIN1-9_AINNL0009	>12.33	>12.33		Inactive	2.61	0.000389	20
AB01974205	01	Ainno_16251	Ainnocence	AIN1-43_AINNL0043	>12.33	>12.33		Inactive	6.63	3.9	20
AB01974596	01	Ainno_16335	Ainnocence	22AIN4-10	>12.67	>12.67		Inactive	7.5	0.127	20
AB01974208	01	Ainno_16251	Ainnocence	AIN1-46_AINNL0046	>13.11	>13.11		Inactive	6.72	13.11	20
AB01974605	01	Ainno_16335	Ainnocence	22AIN4-19	>13.56	>13.56		Inactive	4.51	0.00136	20
AB01974204	01	Ainno_16251	Ainnocence	AIN1-37_AINNL0037	>2.11	>2.11		Inactive	4.2	0.00211	20
AB01974203	01	Ainno_16251	Ainnocence	AIN1-35_AINNL0035	>2.33	>2.33		Inactive	3.92	0.737	20
AB01974202	01	Ainno_16251	Ainnocence	AIN1-34_AINNL0034	>2.56	>2.56		Inactive	6.98	0.00256	20
AB01974209	01	Ainno_16251	Ainnocence	AIN1-47_AINNL0047	>24.78	>24.78		Inactive	6.32	0.000785	20
AB01974197	01	Ainno_16251	Ainnocence	AIN1-23_AINNL0023	>3.44	>3.44		Inactive	2.88	0.0345	20
AB01974183	01	Ainno_16251	Ainnocence	AIN1-2_AINNL0002	>4.78	>4.78		Inactive	3.38	0.00478	20
AB01974195	01	Ainno_16251	Ainnocence	AIN1-12_AINNL0012	>41.22	>41.22		Inactive	5.85	0.013	20
AB01974196	01	Ainno_16251	Ainnocence	AIN1-20_AINNL0020	>45.22	>45.22		Inactive	6.23	4.53	20
AB01974192	01	Ainno_16251	Ainnocence	AIN1-11_AINNL0011	>5.44	>5.44		Inactive	10.06	0.00172	20
AB01974184	01	Ainno_16251	Ainnocence	AIN1-4_AINNL0004	>5.67	>5.67		Inactive	9.3	0.566	20
AB01974200	01	Ainno_16251	Ainnocence	AIN1-25_AINNL0025	>7.67	>7.67		Inactive	4.16	0.0769	20
AB01974176	01	Ainno_16251	Ainnocence	AIN1-30_AINNL0030	>8.67	>8.67		Inactive	11.3	0.000867	20
AB01974180	01	Ainno_16251	Ainnocence	AIN1-36_AINNL0036	>9.44	>9.44		Inactive	3.16	9.44	20
AB01974174	01	Ainno_16251	Ainnocence	AIN1-28_AINNL0028	>9.67	>9.67		Inactive	4.41	0.968	20

## Sheet: Cmpds DR Data
Compound ID	Batch	Library ID	Supplier	Supplier ID	Supplier Batch	Plate ID	Well Ref	Assay Conc	Assay Conc Unit	Data Value	% Inhibition	IC50 (ug/mL)	Activity Status	Curve Fit Hill Slope	Curve Fit Norm Chi2	Curve Fit StDev	Number Included Points	Test ID
AB01974163	01	Ainno_16251	Ainnocence	AIN1-3_AINNL0003	Lot# MB15NO4103	TC00821292	A003	11.67	ug/ml	9475	4.07	>11.67	Inactive	0.81	1.94	2113.01	20	20220328_SR2_Omi_COM
AB01974163	01	Ainno_16251	Ainnocence	AIN1-3_AINNL0003	Lot# MB15NO4103	TC00821291	A003	11.67	ug/ml	7150	2.42							20220328_SR2_Omi_COM
AB01974163	01	Ainno_16251	Ainnocence	AIN1-3_AINNL0003	Lot# MB15NO4103	TC00821292	A004	3.69	ug/ml	11450	6.58							20220328_SR2_Omi_COM
AB01974163	01	Ainno_16251	Ainnocence	AIN1-3_AINNL0003	Lot# MB15NO4103	TC00821291	A004	3.69	ug/ml	5925	0.62							20220328_SR2_Omi_COM
AB01974163	01	Ainno_16251	Ainnocence	AIN1-3_AINNL0003	Lot# MB15NO4103	TC00821292	A005	1.17	ug/ml	4325	-2.45							20220328_SR2_Omi_COM
AB01974163	01	Ainno_16251	Ainnocence	AIN1-3_AINNL0003	Lot# MB15NO4103	TC00821291	A005	1.17	ug/ml	5000	-0.75							20220328_SR2_Omi_COM
AB01974163	01	Ainno_16251	Ainnocence	AIN1-3_AINNL0003	Lot# MB15NO4103	TC00821292	A006	0.37	ug/ml	5975	-0.36							20220328_SR2_Omi_COM
AB01974163	01	Ainno_16251	Ainnocence	AIN1-3_AINNL0003	Lot# MB15NO4103	TC00821291	A006	0.37	ug/ml	5950	0.65							20220328_SR2_Omi_COM
AB01974163	01	Ainno_16251	Ainnocence	AIN1-3_AINNL0003	Lot# MB15NO4103	TC00821292	A007	0.117	ug/ml	6575	0.4							20220328_SR2_Omi_COM
AB01974163	01	Ainno_16251	Ainnocence	AIN1-3_AINNL0003	Lot# MB15NO4103	TC00821291	A007	0.117	ug/ml	4850	-0.97							20220328_SR2_Omi_COM
AB01974163	01	Ainno_16251	Ainnocence	AIN1-3_AINNL0003	Lot# MB15NO4103	TC00821292	A008	0.037	ug/ml	3525	-3.47							20220328_SR2_Omi_COM
AB01974163	01	Ainno_16251	Ainnocence	AIN1-3_AINNL0003	Lot# MB15NO4103	TC00821291	A008	0.037	ug/ml	5950	0.65							20220328_SR2_Omi_COM
AB01974163	01	Ainno_16251	Ainnocence	AIN1-3_AINNL0003	Lot# MB15NO4103	TC00821292	A009	0.0117	ug/ml	4475	-2.26							20220328_SR2_Omi_COM
AB01974163	01	Ainno_16251	Ainnocence	AIN1-3_AINNL0003	Lot# MB15NO4103	TC00821291	A009	0.0117	ug/ml	5175	-0.49							20220328_SR2_Omi_COM
AB01974163	01	Ainno_16251	Ainnocence	AIN1-3_AINNL0003	Lot# MB15NO4103	TC00821292	A010	0.0037	ug/ml	7475	1.54							20220328_SR2_Omi_COM
AB01974163	01	Ainno_16251	Ainnocence	AIN1-3_AINNL0003	Lot# MB15NO4103	TC00821291	A010	0.0037	ug/ml	6450	1.39							20220328_SR2_Omi_COM
AB01974163	01	Ainno_16251	Ainnocence	AIN1-3_AINNL0003	Lot# MB15NO4103	TC00821292	A011	0.00117	ug/ml	5975	-0.36							20220328_SR2_Omi_COM
AB01974163	01	Ainno_16251	Ainnocence	AIN1-3_AINNL0003	Lot# MB15NO4103	TC00821291	A011	0.00117	ug/ml	6475	1.43							20220328_SR2_Omi_COM
AB01974163	01	Ainno_16251	Ainnocence	AIN1-3_AINNL0003	Lot# MB15NO4103	TC00821292	A012	0.00037	ug/ml	7100	1.06							20220328_SR2_Omi_COM
AB01974163	01	Ainno_16251	Ainnocence	AIN1-3_AINNL0003	Lot# MB15NO4103	TC00821291	A012	0.00037	ug/ml	4800	-1.04							20220328_SR2_Omi_COM
AB01974179	01	Ainno_16251	Ainnocence	AIN1-33_AINNL0033	Lot# MB15NO4133	TC00821292	A013	10.67	ug/ml	6075	-0.23	>10.67	Inactive	0.57	1.94	>9999	20	20220328_SR2_Omi_COM
AB01974179	01	Ainno_16251	Ainnocence	AIN1-33_AINNL0033	Lot# MB15NO4133	TC00821291	A013	10.67	ug/ml	5925	0.62							20220328_SR2_Omi_COM
AB01974179	01	Ainno_16251	Ainnocence	AIN1-33_AINNL0033	Lot# MB15NO4133	TC00821292	A014	3.38	ug/ml	4525	-2.2							20220328_SR2_Omi_COM
AB01974179	01	Ainno_16251	Ainnocence	AIN1-33_AINNL0033	Lot# MB15NO4133	TC00821291	A014	3.38	ug/ml	6500	1.46							20220328_SR2_Omi_COM
AB01974179	01	Ainno_16251	Ainnocence	AIN1-33_AINNL0033	Lot# MB15NO4133	TC00821292	A015	1.07	ug/ml	5500	-0.96							20220328_SR2_Omi_COM
AB01974179	01	Ainno_16251	Ainnocence	AIN1-33_AINNL0033	Lot# MB15NO4133	TC00821291	A015	1.07	ug/ml	5350	-0.23							20220328_SR2_Omi_COM
AB01974179	01	Ainno_16251	Ainnocence	AIN1-33_AINNL0033	Lot# MB15NO4133	TC00821292	A016	0.339	ug/ml	9225	3.76							20220328_SR2_Omi_COM
AB01974179	01	Ainno_16251	Ainnocence	AIN1-33_AINNL0033	Lot# MB15NO4133	TC00821291	A016	0.339	ug/ml	5075	-0.64							20220328_SR2_Omi_COM
AB01974179	01	Ainno_16251	Ainnocence	AIN1-33_AINNL0033	Lot# MB15NO4133	TC00821292	A017	0.107	ug/ml	8175	2.43							20220328_SR2_Omi_COM
AB01974179	01	Ainno_16251	Ainnocence	AIN1-33_AINNL0033	Lot# MB15NO4133	TC00821291	A017	0.107	ug/ml	6825	1.94							20220328_SR2_Omi_COM
AB01974179	01	Ainno_16251	Ainnocence	AIN1-33_AINNL0033	Lot# MB15NO4133	TC00821292	A018	0.0339	ug/ml	5900	-0.46							20220328_SR2_Omi_COM
AB01974179	01	Ainno_16251	Ainnocence	AIN1-33_AINNL0033	Lot# MB15NO4133	TC00821291	A018	0.0339	ug/ml	3400	-3.11							20220328_SR2_Omi_COM
AB01974179	01	Ainno_16251	Ainnocence	AIN1-33_AINNL0033	Lot# MB15NO4133	TC00821292	A019	0.0107	ug/ml	4000	-2.86							20220328_SR2_Omi_COM
AB01974179	01	Ainno_16251	Ainnocence	AIN1-33_AINNL0033	Lot# MB15NO4133	TC00821291	A019	0.0107	ug/ml	4300	-1.78							20220328_SR2_Omi_COM
AB01974179	01	Ainno_16251	Ainnocence	AIN1-33_AINNL0033	Lot# MB15NO4133	TC00821292	A020	0.00339	ug/ml	5850	-0.52							20220328_SR2_Omi_COM
AB01974179	01	Ainno_16251	Ainnocence	AIN1-33_AINNL0033	Lot# MB15NO4133	TC00821291	A020	0.00339	ug/ml	3925	-2.33							20220328_SR2_Omi_COM
AB01974179	01	Ainno_16251	Ainnocence	AIN1-33_AINNL0033	Lot# MB15NO4133	TC00821292	A021	0.00107	ug/ml	5775	-0.61							20220328_SR2_Omi_COM
AB01974179	01	Ainno_16251	Ainnocence	AIN1-33_AINNL0033	Lot# MB15NO4133	TC00821291	A021	0.00107	ug/ml	3950	-2.3							20220328_SR2_Omi_COM
AB01974179	01	Ainno_16251	Ainnocence	AIN1-33_AINNL0033	Lot# MB15NO4133	TC00821292	A022	0.000339	ug/ml	6675	0.53							20220328_SR2_Omi_COM
AB01974179	01	Ainno_16251	Ainnocence	AIN1-33_AINNL0033	Lot# MB15NO4133	TC00821291	A022	0.000339	ug/ml	6450	1.39							20220328_SR2_Omi_COM
AB01974164	01	Ainno_16251	Ainnocence	AIN1-5_AINNL0005	Lot# MB15NO4105	TC00821292	B003	11.78	ug/ml	4775	-1.88	>11.78	Inactive	-1.64	2.04	0.07	20	20220328_SR2_Omi_COM
AB01974164	01	Ainno_16251	Ainnocence	AIN1-5_AINNL0005	Lot# MB15NO4105	TC00821291	B003	11.78	ug/ml	4000	-2.22							20220328_SR2_Omi_COM
AB01974164	01	Ainno_16251	Ainnocence	AIN1-5_AINNL0005	Lot# MB15NO4105	TC00821292	B004	3.73	ug/ml	6300	0.05							20220328_SR2_Omi_COM
AB01974164	01	Ainno_16251	Ainnocence	AIN1-5_AINNL0005	Lot# MB15NO4105	TC00821291	B004	3.73	ug/ml	3200	-3.4							20220328_SR2_Omi_COM
AB01974164	01	Ainno_16251	Ainnocence	AIN1-5_AINNL0005	Lot# MB15NO4105	TC00821292	B005	1.18	ug/ml	5625	-0.8							20220328_SR2_Omi_COM
AB01974164	01	Ainno_16251	Ainnocence	AIN1-5_AINNL0005	Lot# MB15NO4105	TC00821291	B005	1.18	ug/ml	4650	-1.26							20220328_SR2_Omi_COM
AB01974164	01	Ainno_16251	Ainnocence	AIN1-5_AINNL0005	Lot# MB15NO4105	TC00821292	B006	0.373	ug/ml	5650	-0.77							20220328_SR2_Omi_COM
AB01974164	01	Ainno_16251	Ainnocence	AIN1-5_AINNL0005	Lot# MB15NO4105	TC00821291	B006	0.373	ug/ml	6175	0.99							20220328_SR2_Omi_COM
AB01974164	01	Ainno_16251	Ainnocence	AIN1-5_AINNL0005	Lot# MB15NO4105	TC00821292	B007	0.118	ug/ml	5825	-0.55							20220328_SR2_Omi_COM
AB01974164	01	Ainno_16251	Ainnocence	AIN1-5_AINNL0005	Lot# MB15NO4105	TC00821291	B007	0.118	ug/ml	4950	-0.82							20220328_SR2_Omi_COM
AB01974164	01	Ainno_16251	Ainnocence	AIN1-5_AINNL0005	Lot# MB15NO4105	TC00821292	B008	0.0373	ug/ml	6700	0.56							20220328_SR2_Omi_COM
AB01974164	01	Ainno_16251	Ainnocence	AIN1-5_AINNL0005	Lot# MB15NO4105	TC00821291	B008	0.0373	ug/ml	3875	-2.41							20220328_SR2_Omi_COM
AB01974164	01	Ainno_16251	Ainnocence	AIN1-5_AINNL0005	Lot# MB15NO4105	TC00821292	B009	0.0118	ug/ml	8275	2.55							20220328_SR2_Omi_COM
AB01974164	01	Ainno_16251	Ainnocence	AIN1-5_AINNL0005	Lot# MB15NO4105	TC00821291	B009	0.0118	ug/ml	3925	-2.33							20220328_SR2_Omi_COM
AB01974164	01	Ainno_16251	Ainnocence	AIN1-5_AINNL0005	Lot# MB15NO4105	TC00821292	B010	0.00373	ug/ml	6775	0.65							20220328_SR2_Omi_COM
AB01974164	01	Ainno_16251	Ainnocence	AIN1-5_AINNL0005	Lot# MB15NO4105	TC00821291	B010	0.00373	ug/ml	3875	-2.41							20220328_SR2_Omi_COM
AB01974164	01	Ainno_16251	Ainnocence	AIN1-5_AINNL0005	Lot# MB15NO4105	TC00821292	B011	0.00118	ug/ml	8300	2.58							20220328_SR2_Omi_COM
AB01974164	01	Ainno_16251	Ainnocence	AIN1-5_AINNL0005	Lot# MB15NO4105	TC00821291	B011	0.00118	ug/ml	7725	3.27							20220328_SR2_Omi_COM
AB01974164	01	Ainno_16251	Ainnocence	AIN1-5_AINNL0005	Lot# MB15NO4105	TC00821292	B012	0.000373	ug/ml	4050	-2.8							20220328_SR2_Omi_COM
AB01974164	01	Ainno_16251	Ainnocence	AIN1-5_AINNL0005	Lot# MB15NO4105	TC00821291	B012	0.000373	ug/ml	4950	-0.82							20220328_SR2_Omi_COM
AB01974180	01	Ainno_16251	Ainnocence	AIN1-36_AINNL0036	Lot# MB15NO4136	TC00821292	B013	9.44	ug/ml	5800	-0.58	>9.44	Inactive	-1.04	1.68	0	20	20220328_SR2_Omi_COM
AB01974180	01	Ainno_16251	Ainnocence	AIN1-36_AINNL0036	Lot# MB15NO4136	TC00821291	B013	9.44	ug/ml	7650	3.16							20220328_SR2_Omi_COM
AB01974180	01	Ainno_16251	Ainnocence	AIN1-36_AINNL0036	Lot# MB15NO4136	TC00821292	B014	2.99	ug/ml	7275	1.29							20220328_SR2_Omi_COM
AB01974180	01	Ainno_16251	Ainnocence	AIN1-36_AINNL0036	Lot# MB15NO4136	TC00821291	B014	2.99	ug/ml	4550	-1.41							20220328_SR2_Omi_COM
AB01974180	01	Ainno_16251	Ainnocence	AIN1-36_AINNL0036	Lot# MB15NO4136	TC00821292	B015	0.946	ug/ml	6700	0.56							20220328_SR2_Omi_COM
AB01974180	01	Ainno_16251	Ainnocence	AIN1-36_AINNL0036	Lot# MB15NO4136	TC00821291	B015	0.946	ug/ml	4925	-0.86							20220328_SR2_Omi_COM
AB01974180	01	Ainno_16251	Ainnocence	AIN1-36_AINNL0036	Lot# MB15NO4136	TC00821292	B016	0.299	ug/ml	3550	-3.43							20220328_SR2_Omi_COM
AB01974180	01	Ainno_16251	Ainnocence	AIN1-36_AINNL0036	Lot# MB15NO4136	TC00821291	B016	0.299	ug/ml	4725	-1.15							20220328_SR2_Omi_COM
AB01974180	01	Ainno_16251	Ainnocence	AIN1-36_AINNL0036	Lot# MB15NO4136	TC00821292	B017	0.0946	ug/ml	5350	-1.15							20220328_SR2_Omi_COM
AB01974180	01	Ainno_16251	Ainnocence	AIN1-36_AINNL0036	Lot# MB15NO4136	TC00821291	B017	0.0946	ug/ml	4875	-0.93							20220328_SR2_Omi_COM
AB01974180	01	Ainno_16251	Ainnocence	AIN1-36_AINNL0036	Lot# MB15NO4136	TC00821292	B018	0.0299	ug/ml	7350	1.38							20220328_SR2_Omi_COM
AB01974180	01	Ainno_16251	Ainnocence	AIN1-36_AINNL0036	Lot# MB15NO4136	TC00821291	B018	0.0299	ug/ml	4475	-1.52							20220328_SR2_Omi_COM
AB01974180	01	Ainno_16251	Ainnocence	AIN1-36_AINNL0036	Lot# MB15NO4136	TC00821292	B019	0.00946	ug/ml	6450	0.24							20220328_SR2_Omi_COM
AB01974180	01	Ainno_16251	Ainnocence	AIN1-36_AINNL0036	Lot# MB15NO4136	TC00821291	B019	0.00946	ug/ml	4325	-1.74							20220328_SR2_Omi_COM
AB01974180	01	Ainno_16251	Ainnocence	AIN1-36_AINNL0036	Lot# MB15NO4136	TC00821292	B020	0.00299	ug/ml	4650	-2.04							20220328_SR2_Omi_COM
AB01974180	01	Ainno_16251	Ainnocence	AIN1-36_AINNL0036	Lot# MB15NO4136	TC00821291	B020	0.00299	ug/ml	4525	-1.45							20220328_SR2_Omi_COM
AB01974180	01	Ainno_16251	Ainnocence	AIN1-36_AINNL0036	Lot# MB15NO4136	TC00821292	B021	0.000946	ug/ml	7625	1.73							20220328_SR2_Omi_COM
AB01974180	01	Ainno_16251	Ainnocence	AIN1-36_AINNL0036	Lot# MB15NO4136	TC00821291	B021	0.000946	ug/ml	6825	1.94							20220328_SR2_Omi_COM
AB01974180	01	Ainno_16251	Ainnocence	AIN1-36_AINNL0036	Lot# MB15NO4136	TC00821292	B022	0.000299	ug/ml	6400	0.18							20220328_SR2_Omi_COM
AB01974180	01	Ainno_16251	Ainnocence	AIN1-36_AINNL0036	Lot# MB15NO4136	TC00821291	B022	0.000299	ug/ml	6775	1.87							20220328_SR2_Omi_COM
AB01974165	01	Ainno_16251	Ainnocence	AIN1-6_AINNL0006	Lot# MB15NO4106	TC00821292	C003	11.78	ug/ml	3750	-3.18	>11.78	Inactive	-50.95	2.47	NaN	20	20220328_SR2_Omi_COM
AB01974165	01	Ainno_16251	Ainnocence	AIN1-6_AINNL0006	Lot# MB15NO4106	TC00821291	C003	11.78	ug/ml	2650	-4.21							20220328_SR2_Omi_COM
AB01974165	01	Ainno_16251	Ainnocence	AIN1-6_AINNL0006	Lot# MB15NO4106	TC00821292	C004	3.73	ug/ml	5175	-1.38							20220328_SR2_Omi_COM
AB01974165	01	Ainno_16251	Ainnocence	AIN1-6_AINNL0006	Lot# MB15NO4106	TC00821291	C004	3.73	ug/ml	5850	0.51							20220328_SR2_Omi_COM
AB01974165	01	Ainno_16251	Ainnocence	AIN1-6_AINNL0006	Lot# MB15NO4106	TC00821292	C005	1.18	ug/ml	4225	-2.58							20220328_SR2_Omi_COM
AB01974165	01	Ainno_16251	Ainnocence	AIN1-6_AINNL0006	Lot# MB15NO4106	TC00821291	C005	1.18	ug/ml	4050	-2.15							20220328_SR2_Omi_COM
AB01974165	01	Ainno_16251	Ainnocence	AIN1-6_AINNL0006	Lot# MB15NO4106	TC00821292	C006	0.373	ug/ml	3800	-3.12							20220328_SR2_Omi_COM
AB01974165	01	Ainno_16251	Ainnocence	AIN1-6_AINNL0006	Lot# MB15NO4106	TC00821291	C006	0.373	ug/ml	4625	-1.3							20220328_SR2_Omi_COM
AB01974165	01	Ainno_16251	Ainnocence	AIN1-6_AINNL0006	Lot# MB15NO4106	TC00821292	C007	0.118	ug/ml	5600	-0.84							20220328_SR2_Omi_COM
AB01974165	01	Ainno_16251	Ainnocence	AIN1-6_AINNL0006	Lot# MB15NO4106	TC00821291	C007	0.118	ug/ml	4950	-0.82							20220328_SR2_Omi_COM
AB01974165	01	Ainno_16251	Ainnocence	AIN1-6_AINNL0006	Lot# MB15NO4106	TC00821292	C008	0.0373	ug/ml	8625	3							20220328_SR2_Omi_COM
AB01974165	01	Ainno_16251	Ainnocence	AIN1-6_AINNL0006	Lot# MB15NO4106	TC00821291	C008	0.0373	ug/ml	4475	-1.52							20220328_SR2_Omi_COM
AB01974165	01	Ainno_16251	Ainnocence	AIN1-6_AINNL0006	Lot# MB15NO4106	TC00821292	C009	0.0118	ug/ml	9625	4.26							20220328_SR2_Omi_COM
AB01974165	01	Ainno_16251	Ainnocence	AIN1-6_AINNL0006	Lot# MB15NO4106	TC00821291	C009	0.0118	ug/ml	3925	-2.33							20220328_SR2_Omi_COM
AB01974165	01	Ainno_16251	Ainnocence	AIN1-6_AINNL0006	Lot# MB15NO4106	TC00821292	C010	0.00373	ug/ml	5500	-0.96							20220328_SR2_Omi_COM
AB01974165	01	Ainno_16251	Ainnocence	AIN1-6_AINNL0006	Lot# MB15NO4106	TC00821291	C010	0.00373	ug/ml	4625	-1.3							20220328_SR2_Omi_COM
AB01974165	01	Ainno_16251	Ainnocence	AIN1-6_AINNL0006	Lot# MB15NO4106	TC00821292	C011	0.00118	ug/ml	5525	-0.93							20220328_SR2_Omi_COM
AB01974165	01	Ainno_16251	Ainnocence	AIN1-6_AINNL0006	Lot# MB15NO4106	TC00821291	C011	0.00118	ug/ml	4025	-2.19							20220328_SR2_Omi_COM
AB01974165	01	Ainno_16251	Ainnocence	AIN1-6_AINNL0006	Lot# MB15NO4106	TC00821292	C012	0.000373	ug/ml	7775	1.92							20220328_SR2_Omi_COM
AB01974165	01	Ainno_16251	Ainnocence	AIN1-6_AINNL0006	Lot# MB15NO4106	TC00821291	C012	0.000373	ug/ml	3525	-2.92							20220328_SR2_Omi_COM
AB01974181	01	Ainno_16251	Ainnocence	AIN1-1_AINNL0001	Lot# MB15NO4101	TC00821292	C013	11	ug/ml	6275	0.02	>11.00	Inactive	0.99	3.95	>9999	20	20220328_SR2_Omi_COM
AB01974181	01	Ainno_16251	Ainnocence	AIN1-1_AINNL0001	Lot# MB15NO4101	TC00821291	C013	11	ug/ml	3950	-2.3							20220328_SR2_Omi_COM
AB01974181	01	Ainno_16251	Ainnocence	AIN1-1_AINNL0001	Lot# MB15NO4101	TC00821292	C014	3.48	ug/ml	17700	14.5							20220328_SR2_Omi_COM
AB01974181	01	Ainno_16251	Ainnocence	AIN1-1_AINNL0001	Lot# MB15NO4101	TC00821291	C014	3.48	ug/ml	5800	0.43							20220328_SR2_Omi_COM
AB01974181	01	Ainno_16251	Ainnocence	AIN1-1_AINNL0001	Lot# MB15NO4101	TC00821292	C015	1.1	ug/ml	5625	-0.8							20220328_SR2_Omi_COM
AB01974181	01	Ainno_16251	Ainnocence	AIN1-1_AINNL0001	Lot# MB15NO4101	TC00821291	C015	1.1	ug/ml	4900	-0.9							20220328_SR2_Omi_COM
AB01974181	01	Ainno_16251	Ainnocence	AIN1-1_AINNL0001	Lot# MB15NO4101	TC00821292	C016	0.348	ug/ml	4875	-1.76							20220328_SR2_Omi_COM
AB01974181	01	Ainno_16251	Ainnocence	AIN1-1_AINNL0001	Lot# MB15NO4101	TC00821291	C016	0.348	ug/ml	5125	-0.56							20220328_SR2_Omi_COM
AB01974181	01	Ainno_16251	Ainnocence	AIN1-1_AINNL0001	Lot# MB15NO4101	TC00821292	C017	0.11	ug/ml	6750	0.62							20220328_SR2_Omi_COM
AB01974181	01	Ainno_16251	Ainnocence	AIN1-1_AINNL0001	Lot# MB15NO4101	TC00821291	C017	0.11	ug/ml	7700	3.23							20220328_SR2_Omi_COM
AB01974181	01	Ainno_16251	Ainnocence	AIN1-1_AINNL0001	Lot# MB15NO4101	TC00821292	C018	0.0348	ug/ml	6325	0.08							20220328_SR2_Omi_COM
AB01974181	01	Ainno_16251	Ainnocence	AIN1-1_AINNL0001	Lot# MB15NO4101	TC00821291	C018	0.0348	ug/ml	3600	-2.81							20220328_SR2_Omi_COM
AB01974181	01	Ainno_16251	Ainnocence	AIN1-1_AINNL0001	Lot# MB15NO4101	TC00821292	C019	0.011	ug/ml	5550	-0.9							20220328_SR2_Omi_COM
AB01974181	01	Ainno_16251	Ainnocence	AIN1-1_AINNL0001	Lot# MB15NO4101	TC00821291	C019	0.011	ug/ml	3600	-2.81							20220328_SR2_Omi_COM
AB01974181	01	Ainno_16251	Ainnocence	AIN1-1_AINNL0001	Lot# MB15NO4101	TC00821292	C020	0.00348	ug/ml	5525	-0.93							20220328_SR2_Omi_COM
AB01974181	01	Ainno_16251	Ainnocence	AIN1-1_AINNL0001	Lot# MB15NO4101	TC00821291	C020	0.00348	ug/ml	8525	4.45							20220328_SR2_Omi_COM
AB01974181	01	Ainno_16251	Ainnocence	AIN1-1_AINNL0001	Lot# MB15NO4101	TC00821292	C021	0.0011	ug/ml	5425	-1.06							20220328_SR2_Omi_COM
AB01974181	01	Ainno_16251	Ainnocence	AIN1-1_AINNL0001	Lot# MB15NO4101	TC00821291	C021	0.0011	ug/ml	4575	-1.37							20220328_SR2_Omi_COM
AB01974181	01	Ainno_16251	Ainnocence	AIN1-1_AINNL0001	Lot# MB15NO4101	TC00821292	C022	0.000348	ug/ml	4175	-2.64							20220328_SR2_Omi_COM
AB01974181	01	Ainno_16251	Ainnocence	AIN1-1_AINNL0001	Lot# MB15NO4101	TC00821291	C022	0.000348	ug/ml	6525	1.5							20220328_SR2_Omi_COM
AB01974166	01	Ainno_16251	Ainnocence	AIN1-7_AINNL0007	Lot# MB15NO4107	TC00821292	D003	11.78	ug/ml	5800	-0.58	>11.78	Inactive	4.89	1.56	>9999	20	20220328_SR2_Omi_COM
AB01974166	01	Ainno_16251	Ainnocence	AIN1-7_AINNL0007	Lot# MB15NO4107	TC00821291	D003	11.78	ug/ml	5900	0.58							20220328_SR2_Omi_COM
AB01974166	01	Ainno_16251	Ainnocence	AIN1-7_AINNL0007	Lot# MB15NO4107	TC00821292	D004	3.73	ug/ml	7175	1.16							20220328_SR2_Omi_COM
AB01974166	01	Ainno_16251	Ainnocence	AIN1-7_AINNL0007	Lot# MB15NO4107	TC00821291	D004	3.73	ug/ml	5875	0.54							20220328_SR2_Omi_COM
AB01974166	01	Ainno_16251	Ainnocence	AIN1-7_AINNL0007	Lot# MB15NO4107	TC00821292	D005	1.18	ug/ml	4900	-1.72							20220328_SR2_Omi_COM
AB01974166	01	Ainno_16251	Ainnocence	AIN1-7_AINNL0007	Lot# MB15NO4107	TC00821291	D005	1.18	ug/ml	5400	-0.16							20220328_SR2_Omi_COM
AB01974166	01	Ainno_16251	Ainnocence	AIN1-7_AINNL0007	Lot# MB15NO4107	TC00821292	D006	0.373	ug/ml	3475	-3.53							20220328_SR2_Omi_COM
AB01974166	01	Ainno_16251	Ainnocence	AIN1-7_AINNL0007	Lot# MB15NO4107	TC00821291	D006	0.373	ug/ml	4575	-1.37							20220328_SR2_Omi_COM
AB01974166	01	Ainno_16251	Ainnocence	AIN1-7_AINNL0007	Lot# MB15NO4107	TC00821292	D007	0.118	ug/ml	5825	-0.55							20220328_SR2_Omi_COM
AB01974166	01	Ainno_16251	Ainnocence	AIN1-7_AINNL0007	Lot# MB15NO4107	TC00821291	D007	0.118	ug/ml	5450	-0.08							20220328_SR2_Omi_COM
AB01974166	01	Ainno_16251	Ainnocence	AIN1-7_AINNL0007	Lot# MB15NO4107	TC00821292	D008	0.0373	ug/ml	5725	-0.68							20220328_SR2_Omi_COM
AB01974166	01	Ainno_16251	Ainnocence	AIN1-7_AINNL0007	Lot# MB15NO4107	TC00821291	D008	0.0373	ug/ml	5950	0.65							20220328_SR2_Omi_COM
AB01974166	01	Ainno_16251	Ainnocence	AIN1-7_AINNL0007	Lot# MB15NO4107	TC00821292	D009	0.0118	ug/ml	4625	-2.07							20220328_SR2_Omi_COM
AB01974166	01	Ainno_16251	Ainnocence	AIN1-7_AINNL0007	Lot# MB15NO4107	TC00821291	D009	0.0118	ug/ml	5250	-0.38							20220328_SR2_Omi_COM
AB01974166	01	Ainno_16251	Ainnocence	AIN1-7_AINNL0007	Lot# MB15NO4107	TC00821292	D010	0.00373	ug/ml	6325	0.08							20220328_SR2_Omi_COM
AB01974166	01	Ainno_16251	Ainnocence	AIN1-7_AINNL0007	Lot# MB15NO4107	TC00821291	D010	0.00373	ug/ml	4625	-1.3							20220328_SR2_Omi_COM
AB01974166	01	Ainno_16251	Ainnocence	AIN1-7_AINNL0007	Lot# MB15NO4107	TC00821292	D011	0.00118	ug/ml	8375	2.68							20220328_SR2_Omi_COM
AB01974166	01	Ainno_16251	Ainnocence	AIN1-7_AINNL0007	Lot# MB15NO4107	TC00821291	D011	0.00118	ug/ml	5275	-0.34							20220328_SR2_Omi_COM
AB01974166	01	Ainno_16251	Ainnocence	AIN1-7_AINNL0007	Lot# MB15NO4107	TC00821292	D012	0.000373	ug/ml	6725	0.59							20220328_SR2_Omi_COM
AB01974166	01	Ainno_16251	Ainnocence	AIN1-7_AINNL0007	Lot# MB15NO4107	TC00821291	D012	0.000373	ug/ml	3425	-3.07							20220328_SR2_Omi_COM
AB01974167	01	Ainno_16251	Ainnocence	AIN1-8_AINNL0008	Lot# MB15NO4108	TC00821292	E003	11.78	ug/ml	6200	-0.08	>11.78	Inactive	-1.07	1.57	0	20	20220328_SR2_Omi_COM
AB01974167	01	Ainno_16251	Ainnocence	AIN1-8_AINNL0008	Lot# MB15NO4108	TC00821291	E003	11.78	ug/ml	6375	1.28							20220328_SR2_Omi_COM
AB01974167	01	Ainno_16251	Ainnocence	AIN1-8_AINNL0008	Lot# MB15NO4108	TC00821292	E004	3.73	ug/ml	4550	-2.17							20220328_SR2_Omi_COM
AB01974167	01	Ainno_16251	Ainnocence	AIN1-8_AINNL0008	Lot# MB15NO4108	TC00821291	E004	3.73	ug/ml	5150	-0.53							20220328_SR2_Omi_COM
AB01974167	01	Ainno_16251	Ainnocence	AIN1-8_AINNL0008	Lot# MB15NO4108	TC00821292	E005	1.18	ug/ml	3950	-2.93							20220328_SR2_Omi_COM
AB01974167	01	Ainno_16251	Ainnocence	AIN1-8_AINNL0008	Lot# MB15NO4108	TC00821291	E005	1.18	ug/ml	5625	0.17							20220328_SR2_Omi_COM
AB01974167	01	Ainno_16251	Ainnocence	AIN1-8_AINNL0008	Lot# MB15NO4108	TC00821292	E006	0.373	ug/ml	6850	0.75							20220328_SR2_Omi_COM
AB01974167	01	Ainno_16251	Ainnocence	AIN1-8_AINNL0008	Lot# MB15NO4108	TC00821291	E006	0.373	ug/ml	4225	-1.89							20220328_SR2_Omi_COM
AB01974167	01	Ainno_16251	Ainnocence	AIN1-8_AINNL0008	Lot# MB15NO4108	TC00821292	E007	0.118	ug/ml	4650	-2.04							20220328_SR2_Omi_COM
AB01974167	01	Ainno_16251	Ainnocence	AIN1-8_AINNL0008	Lot# MB15NO4108	TC00821291	E007	0.118	ug/ml	5725	0.32							20220328_SR2_Omi_COM
AB01974167	01	Ainno_16251	Ainnocence	AIN1-8_AINNL0008	Lot# MB15NO4108	TC00821292	E008	0.0373	ug/ml	4950	-1.66							20220328_SR2_Omi_COM
AB01974167	01	Ainno_16251	Ainnocence	AIN1-8_AINNL0008	Lot# MB15NO4108	TC00821291	E008	0.0373	ug/ml	5025	-0.71							20220328_SR2_Omi_COM
AB01974167	01	Ainno_16251	Ainnocence	AIN1-8_AINNL0008	Lot# MB15NO4108	TC00821292	E009	0.0118	ug/ml	5575	-0.87							20220328_SR2_Omi_COM
AB01974167	01	Ainno_16251	Ainnocence	AIN1-8_AINNL0008	Lot# MB15NO4108	TC00821291	E009	0.0118	ug/ml	3750	-2.59							20220328_SR2_Omi_COM
AB01974167	01	Ainno_16251	Ainnocence	AIN1-8_AINNL0008	Lot# MB15NO4108	TC00821292	E010	0.00373	ug/ml	6125	-0.17							20220328_SR2_Omi_COM
AB01974167	01	Ainno_16251	Ainnocence	AIN1-8_AINNL0008	Lot# MB15NO4108	TC00821291	E010	0.00373	ug/ml	6625	1.65							20220328_SR2_Omi_COM
AB01974167	01	Ainno_16251	Ainnocence	AIN1-8_AINNL0008	Lot# MB15NO4108	TC00821292	E011	0.00118	ug/ml	5575	-0.87							20220328_SR2_Omi_COM
AB01974167	01	Ainno_16251	Ainnocence	AIN1-8_AINNL0008	Lot# MB15NO4108	TC00821291	E011	0.00118	ug/ml	7200	2.5							20220328_SR2_Omi_COM
AB01974167	01	Ainno_16251	Ainnocence	AIN1-8_AINNL0008	Lot# MB15NO4108	TC00821292	E012	0.000373	ug/ml	8325	2.62							20220328_SR2_Omi_COM
AB01974167	01	Ainno_16251	Ainnocence	AIN1-8_AINNL0008	Lot# MB15NO4108	TC00821291	E012	0.000373	ug/ml	6050	0.8							20220328_SR2_Omi_COM
AB01974183	01	Ainno_16251	Ainnocence	AIN1-2_AINNL0002	Lot# MB15NO2511	TC00821292	E013	4.78	ug/ml	6350	0.11	>4.78	Inactive	-6.14	2.3	0.02	20	20220328_SR2_Omi_COM
AB01974183	01	Ainno_16251	Ainnocence	AIN1-2_AINNL0002	Lot# MB15NO2511	TC00821291	E013	4.78	ug/ml	4475	-1.52							20220328_SR2_Omi_COM
AB01974183	01	Ainno_16251	Ainnocence	AIN1-2_AINNL0002	Lot# MB15NO2511	TC00821292	E014	1.51	ug/ml	7225	1.22							20220328_SR2_Omi_COM
AB01974183	01	Ainno_16251	Ainnocence	AIN1-2_AINNL0002	Lot# MB15NO2511	TC00821291	E014	1.51	ug/ml	7300	2.64							20220328_SR2_Omi_COM
AB01974183	01	Ainno_16251	Ainnocence	AIN1-2_AINNL0002	Lot# MB15NO2511	TC00821292	E015	0.478	ug/ml	4025	-2.83							20220328_SR2_Omi_COM
AB01974183	01	Ainno_16251	Ainnocence	AIN1-2_AINNL0002	Lot# MB15NO2511	TC00821291	E015	0.478	ug/ml	4500	-1.49							20220328_SR2_Omi_COM
AB01974183	01	Ainno_16251	Ainnocence	AIN1-2_AINNL0002	Lot# MB15NO2511	TC00821292	E016	0.151	ug/ml	7675	1.79							20220328_SR2_Omi_COM
AB01974183	01	Ainno_16251	Ainnocence	AIN1-2_AINNL0002	Lot# MB15NO2511	TC00821291	E016	0.151	ug/ml	3575	-2.85							20220328_SR2_Omi_COM
AB01974183	01	Ainno_16251	Ainnocence	AIN1-2_AINNL0002	Lot# MB15NO2511	TC00821292	E017	0.0478	ug/ml	4450	-2.29							20220328_SR2_Omi_COM
AB01974183	01	Ainno_16251	Ainnocence	AIN1-2_AINNL0002	Lot# MB15NO2511	TC00821291	E017	0.0478	ug/ml	3175	-3.44							20220328_SR2_Omi_COM
AB01974183	01	Ainno_16251	Ainnocence	AIN1-2_AINNL0002	Lot# MB15NO2511	TC00821292	E018	0.0151	ug/ml	6250	-0.01							20220328_SR2_Omi_COM
AB01974183	01	Ainno_16251	Ainnocence	AIN1-2_AINNL0002	Lot# MB15NO2511	TC00821291	E018	0.0151	ug/ml	6025	0.76							20220328_SR2_Omi_COM
AB01974183	01	Ainno_16251	Ainnocence	AIN1-2_AINNL0002	Lot# MB15NO2511	TC00821292	E019	0.00478	ug/ml	4950	-1.66							20220328_SR2_Omi_COM
AB01974183	01	Ainno_16251	Ainnocence	AIN1-2_AINNL0002	Lot# MB15NO2511	TC00821291	E019	0.00478	ug/ml	7800	3.38							20220328_SR2_Omi_COM
AB01974183	01	Ainno_16251	Ainnocence	AIN1-2_AINNL0002	Lot# MB15NO2511	TC00821292	E020	0.00151	ug/ml	8050	2.27							20220328_SR2_Omi_COM
AB01974183	01	Ainno_16251	Ainnocence	AIN1-2_AINNL0002	Lot# MB15NO2511	TC00821291	E020	0.00151	ug/ml	4200	-1.93							20220328_SR2_Omi_COM
AB01974183	01	Ainno_16251	Ainnocence	AIN1-2_AINNL0002	Lot# MB15NO2511	TC00821292	E021	0.000478	ug/ml	8500	2.84							20220328_SR2_Omi_COM
AB01974183	01	Ainno_16251	Ainnocence	AIN1-2_AINNL0002	Lot# MB15NO2511	TC00821291	E021	0.000478	ug/ml	3300	-3.26							20220328_SR2_Omi_COM
AB01974183	01	Ainno_16251	Ainnocence	AIN1-2_AINNL0002	Lot# MB15NO2511	TC00821292	E022	0.000151	ug/ml	5800	-0.58							20220328_SR2_Omi_COM
AB01974183	01	Ainno_16251	Ainnocence	AIN1-2_AINNL0002	Lot# MB15NO2511	TC00821291	E022	0.000151	ug/ml	6875	2.02							20220328_SR2_Omi_COM
AB01974168	01	Ainno_16251	Ainnocence	AIN1-9_AINNL0009	Lot# MB15NO4109	TC00821292	F003	12.33	ug/ml	7375	1.41	>12.33	Inactive	-1.03	1.93	0	20	20220328_SR2_Omi_COM
AB01974168	01	Ainno_16251	Ainnocence	AIN1-9_AINNL0009	Lot# MB15NO4109	TC00821291	F003	12.33	ug/ml	5375	-0.19							20220328_SR2_Omi_COM
AB01974168	01	Ainno_16251	Ainnocence	AIN1-9_AINNL0009	Lot# MB15NO4109	TC00821292	F004	3.9	ug/ml	6025	-0.3							20220328_SR2_Omi_COM
AB01974168	01	Ainno_16251	Ainnocence	AIN1-9_AINNL0009	Lot# MB15NO4109	TC00821291	F004	3.9	ug/ml	3350	-3.18							20220328_SR2_Omi_COM
AB01974168	01	Ainno_16251	Ainnocence	AIN1-9_AINNL0009	Lot# MB15NO4109	TC00821292	F005	1.23	ug/ml	5625	-0.8							20220328_SR2_Omi_COM
AB01974168	01	Ainno_16251	Ainnocence	AIN1-9_AINNL0009	Lot# MB15NO4109	TC00821291	F005	1.23	ug/ml	4225	-1.89							20220328_SR2_Omi_COM
AB01974168	01	Ainno_16251	Ainnocence	AIN1-9_AINNL0009	Lot# MB15NO4109	TC00821292	F006	0.389	ug/ml	5450	-1.03							20220328_SR2_Omi_COM
AB01974168	01	Ainno_16251	Ainnocence	AIN1-9_AINNL0009	Lot# MB15NO4109	TC00821291	F006	0.389	ug/ml	4450	-1.56							20220328_SR2_Omi_COM
AB01974168	01	Ainno_16251	Ainnocence	AIN1-9_AINNL0009	Lot# MB15NO4109	TC00821292	F007	0.123	ug/ml	6075	-0.23							20220328_SR2_Omi_COM
AB01974168	01	Ainno_16251	Ainnocence	AIN1-9_AINNL0009	Lot# MB15NO4109	TC00821291	F007	0.123	ug/ml	3650	-2.74							20220328_SR2_Omi_COM
AB01974168	01	Ainno_16251	Ainnocence	AIN1-9_AINNL0009	Lot# MB15NO4109	TC00821292	F008	0.0389	ug/ml	6025	-0.3							20220328_SR2_Omi_COM
AB01974168	01	Ainno_16251	Ainnocence	AIN1-9_AINNL0009	Lot# MB15NO4109	TC00821291	F008	0.0389	ug/ml	6200	1.02							20220328_SR2_Omi_COM
AB01974168	01	Ainno_16251	Ainnocence	AIN1-9_AINNL0009	Lot# MB15NO4109	TC00821292	F009	0.0123	ug/ml	6250	-0.01							20220328_SR2_Omi_COM
AB01974168	01	Ainno_16251	Ainnocence	AIN1-9_AINNL0009	Lot# MB15NO4109	TC00821291	F009	0.0123	ug/ml	5325	-0.27							20220328_SR2_Omi_COM
AB01974168	01	Ainno_16251	Ainnocence	AIN1-9_AINNL0009	Lot# MB15NO4109	TC00821292	F010	0.00389	ug/ml	4175	-2.64							20220328_SR2_Omi_COM
AB01974168	01	Ainno_16251	Ainnocence	AIN1-9_AINNL0009	Lot# MB15NO4109	TC00821291	F010	0.00389	ug/ml	3050	-3.62							20220328_SR2_Omi_COM
AB01974168	01	Ainno_16251	Ainnocence	AIN1-9_AINNL0009	Lot# MB15NO4109	TC00821292	F011	0.00123	ug/ml	7350	1.38							20220328_SR2_Omi_COM
AB01974168	01	Ainno_16251	Ainnocence	AIN1-9_AINNL0009	Lot# MB15NO4109	TC00821291	F011	0.00123	ug/ml	4150	-2							20220328_SR2_Omi_COM
AB01974168	01	Ainno_16251	Ainnocence	AIN1-9_AINNL0009	Lot# MB15NO4109	TC00821292	F012	0.000389	ug/ml	4350	-2.42							20220328_SR2_Omi_COM
AB01974168	01	Ainno_16251	Ainnocence	AIN1-9_AINNL0009	Lot# MB15NO4109	TC00821291	F012	0.000389	ug/ml	7275	2.61							20220328_SR2_Omi_COM
AB01974184	01	Ainno_16251	Ainnocence	AIN1-4_AINNL0004	Lot# MB15NO4104	TC00821292	F013	5.67	ug/ml	4600	-2.1	>5.67	Inactive	3.25	2.84	>9999	20	20220328_SR2_Omi_COM
AB01974184	01	Ainno_16251	Ainnocence	AIN1-4_AINNL0004	Lot# MB15NO4104	TC00821291	F013	5.67	ug/ml	5225	-0.42							20220328_SR2_Omi_COM
AB01974184	01	Ainno_16251	Ainnocence	AIN1-4_AINNL0004	Lot# MB15NO4104	TC00821292	F014	1.79	ug/ml	6725	0.59							20220328_SR2_Omi_COM
AB01974184	01	Ainno_16251	Ainnocence	AIN1-4_AINNL0004	Lot# MB15NO4104	TC00821291	F014	1.79	ug/ml	4050	-2.15							20220328_SR2_Omi_COM
AB01974184	01	Ainno_16251	Ainnocence	AIN1-4_AINNL0004	Lot# MB15NO4104	TC00821292	F015	0.566	ug/ml	13600	9.3							20220328_SR2_Omi_COM
AB01974184	01	Ainno_16251	Ainnocence	AIN1-4_AINNL0004	Lot# MB15NO4104	TC00821291	F015	0.566	ug/ml	6100	0.87							20220328_SR2_Omi_COM
AB01974184	01	Ainno_16251	Ainnocence	AIN1-4_AINNL0004	Lot# MB15NO4104	TC00821292	F016	0.179	ug/ml	6025	-0.3							20220328_SR2_Omi_COM
AB01974184	01	Ainno_16251	Ainnocence	AIN1-4_AINNL0004	Lot# MB15NO4104	TC00821291	F016	0.179	ug/ml	3500	-2.96							20220328_SR2_Omi_COM
AB01974184	01	Ainno_16251	Ainnocence	AIN1-4_AINNL0004	Lot# MB15NO4104	TC00821292	F017	0.0566	ug/ml	5675	-0.74							20220328_SR2_Omi_COM
AB01974184	01	Ainno_16251	Ainnocence	AIN1-4_AINNL0004	Lot# MB15NO4104	TC00821291	F017	0.0566	ug/ml	6875	2.02							20220328_SR2_Omi_COM
AB01974184	01	Ainno_16251	Ainnocence	AIN1-4_AINNL0004	Lot# MB15NO4104	TC00821292	F018	0.0179	ug/ml	4650	-2.04							20220328_SR2_Omi_COM
AB01974184	01	Ainno_16251	Ainnocence	AIN1-4_AINNL0004	Lot# MB15NO4104	TC00821291	F018	0.0179	ug/ml	3800	-2.52							20220328_SR2_Omi_COM
AB01974184	01	Ainno_16251	Ainnocence	AIN1-4_AINNL0004	Lot# MB15NO4104	TC00821292	F019	0.00566	ug/ml	5350	-1.15							20220328_SR2_Omi_COM
AB01974184	01	Ainno_16251	Ainnocence	AIN1-4_AINNL0004	Lot# MB15NO4104	TC00821291	F019	0.00566	ug/ml	3825	-2.48							20220328_SR2_Omi_COM
AB01974184	01	Ainno_16251	Ainnocence	AIN1-4_AINNL0004	Lot# MB15NO4104	TC00821292	F020	0.00179	ug/ml	7225	1.22							20220328_SR2_Omi_COM
AB01974184	01	Ainno_16251	Ainnocence	AIN1-4_AINNL0004	Lot# MB15NO4104	TC00821291	F020	0.00179	ug/ml	6375	1.28							20220328_SR2_Omi_COM
AB01974184	01	Ainno_16251	Ainnocence	AIN1-4_AINNL0004	Lot# MB15NO4104	TC00821292	F021	0.000566	ug/ml	7975	2.17							20220328_SR2_Omi_COM
AB01974184	01	Ainno_16251	Ainnocence	AIN1-4_AINNL0004	Lot# MB15NO4104	TC00821291	F021	0.000566	ug/ml	3725	-2.63							20220328_SR2_Omi_COM
AB01974184	01	Ainno_16251	Ainnocence	AIN1-4_AINNL0004	Lot# MB15NO4104	TC00821292	F022	0.000179	ug/ml	5875	-0.49							20220328_SR2_Omi_COM
AB01974184	01	Ainno_16251	Ainnocence	AIN1-4_AINNL0004	Lot# MB15NO4104	TC00821291	F022	0.000179	ug/ml	4525	-1.45							20220328_SR2_Omi_COM
AB01974169	01	Ainno_16251	Ainnocence	AIN1-10_AINNL0010	Lot# MB15NO4110	TC00821292	G003	11.67	ug/ml	6100	-0.2	>11.67	Inactive	0.48	2.71	>9999	20	20220328_SR2_Omi_COM
AB01974169	01	Ainno_16251	Ainnocence	AIN1-10_AINNL0010	Lot# MB15NO4110	TC00821291	G003	11.67	ug/ml	8775	4.82							20220328_SR2_Omi_COM
AB01974169	01	Ainno_16251	Ainnocence	AIN1-10_AINNL0010	Lot# MB15NO4110	TC00821292	G004	3.69	ug/ml	14750	10.76							20220328_SR2_Omi_COM
AB01974169	01	Ainno_16251	Ainnocence	AIN1-10_AINNL0010	Lot# MB15NO4110	TC00821291	G004	3.69	ug/ml	6375	1.28							20220328_SR2_Omi_COM
AB01974169	01	Ainno_16251	Ainnocence	AIN1-10_AINNL0010	Lot# MB15NO4110	TC00821292	G005	1.17	ug/ml	5475	-0.99							20220328_SR2_Omi_COM
AB01974169	01	Ainno_16251	Ainnocence	AIN1-10_AINNL0010	Lot# MB15NO4110	TC00821291	G005	1.17	ug/ml	6125	0.91							20220328_SR2_Omi_COM
AB01974169	01	Ainno_16251	Ainnocence	AIN1-10_AINNL0010	Lot# MB15NO4110	TC00821292	G006	0.37	ug/ml	6800	0.68							20220328_SR2_Omi_COM
AB01974169	01	Ainno_16251	Ainnocence	AIN1-10_AINNL0010	Lot# MB15NO4110	TC00821291	G006	0.37	ug/ml	5875	0.54							20220328_SR2_Omi_COM
AB01974169	01	Ainno_16251	Ainnocence	AIN1-10_AINNL0010	Lot# MB15NO4110	TC00821292	G007	0.117	ug/ml	4325	-2.45							20220328_SR2_Omi_COM
AB01974169	01	Ainno_16251	Ainnocence	AIN1-10_AINNL0010	Lot# MB15NO4110	TC00821291	G007	0.117	ug/ml	4125	-2.04							20220328_SR2_Omi_COM
AB01974169	01	Ainno_16251	Ainnocence	AIN1-10_AINNL0010	Lot# MB15NO4110	TC00821292	G008	0.037	ug/ml	4875	-1.76							20220328_SR2_Omi_COM
AB01974169	01	Ainno_16251	Ainnocence	AIN1-10_AINNL0010	Lot# MB15NO4110	TC00821291	G008	0.037	ug/ml	5750	0.36							20220328_SR2_Omi_COM
AB01974169	01	Ainno_16251	Ainnocence	AIN1-10_AINNL0010	Lot# MB15NO4110	TC00821292	G009	0.0117	ug/ml	7175	1.16							20220328_SR2_Omi_COM
AB01974169	01	Ainno_16251	Ainnocence	AIN1-10_AINNL0010	Lot# MB15NO4110	TC00821291	G009	0.0117	ug/ml	5150	-0.53							20220328_SR2_Omi_COM
AB01974169	01	Ainno_16251	Ainnocence	AIN1-10_AINNL0010	Lot# MB15NO4110	TC00821292	G010	0.0037	ug/ml	6550	0.37							20220328_SR2_Omi_COM
AB01974169	01	Ainno_16251	Ainnocence	AIN1-10_AINNL0010	Lot# MB15NO4110	TC00821291	G010	0.0037	ug/ml	6775	1.87							20220328_SR2_Omi_COM
AB01974169	01	Ainno_16251	Ainnocence	AIN1-10_AINNL0010	Lot# MB15NO4110	TC00821292	G011	0.00117	ug/ml	5450	-1.03							20220328_SR2_Omi_COM
AB01974169	01	Ainno_16251	Ainnocence	AIN1-10_AINNL0010	Lot# MB15NO4110	TC00821291	G011	0.00117	ug/ml	5125	-0.56							20220328_SR2_Omi_COM
AB01974169	01	Ainno_16251	Ainnocence	AIN1-10_AINNL0010	Lot# MB15NO4110	TC00821292	G012	0.00037	ug/ml	8600	2.96							20220328_SR2_Omi_COM
AB01974169	01	Ainno_16251	Ainnocence	AIN1-10_AINNL0010	Lot# MB15NO4110	TC00821291	G012	0.00037	ug/ml	6500	1.46							20220328_SR2_Omi_COM
AB01974185	01	Ainno_16251	Ainnocence	AIN1-13_AINNL0013	Lot# MB15NO4113	TC00821292	G013	10.67	ug/ml	6550	0.37	>10.67	Inactive	1.12	1.98	>9999	20	20220328_SR2_Omi_COM
AB01974185	01	Ainno_16251	Ainnocence	AIN1-13_AINNL0013	Lot# MB15NO4113	TC00821291	G013	10.67	ug/ml	5300	-0.31							20220328_SR2_Omi_COM
AB01974185	01	Ainno_16251	Ainnocence	AIN1-13_AINNL0013	Lot# MB15NO4113	TC00821292	G014	3.38	ug/ml	8150	2.39							20220328_SR2_Omi_COM
AB01974185	01	Ainno_16251	Ainnocence	AIN1-13_AINNL0013	Lot# MB15NO4113	TC00821291	G014	3.38	ug/ml	5300	-0.31							20220328_SR2_Omi_COM
AB01974185	01	Ainno_16251	Ainnocence	AIN1-13_AINNL0013	Lot# MB15NO4113	TC00821292	G015	1.07	ug/ml	4475	-2.26							20220328_SR2_Omi_COM
AB01974185	01	Ainno_16251	Ainnocence	AIN1-13_AINNL0013	Lot# MB15NO4113	TC00821291	G015	1.07	ug/ml	4700	-1.19							20220328_SR2_Omi_COM
AB01974185	01	Ainno_16251	Ainnocence	AIN1-13_AINNL0013	Lot# MB15NO4113	TC00821292	G016	0.339	ug/ml	6975	0.91							20220328_SR2_Omi_COM
AB01974185	01	Ainno_16251	Ainnocence	AIN1-13_AINNL0013	Lot# MB15NO4113	TC00821291	G016	0.339	ug/ml	6600	1.61							20220328_SR2_Omi_COM
AB01974185	01	Ainno_16251	Ainnocence	AIN1-13_AINNL0013	Lot# MB15NO4113	TC00821292	G017	0.107	ug/ml	3825	-3.09							20220328_SR2_Omi_COM
AB01974185	01	Ainno_16251	Ainnocence	AIN1-13_AINNL0013	Lot# MB15NO4113	TC00821291	G017	0.107	ug/ml	3050	-3.62							20220328_SR2_Omi_COM
AB01974185	01	Ainno_16251	Ainnocence	AIN1-13_AINNL0013	Lot# MB15NO4113	TC00821292	G018	0.0339	ug/ml	5900	-0.46							20220328_SR2_Omi_COM
AB01974185	01	Ainno_16251	Ainnocence	AIN1-13_AINNL0013	Lot# MB15NO4113	TC00821291	G018	0.0339	ug/ml	7975	3.64							20220328_SR2_Omi_COM
AB01974185	01	Ainno_16251	Ainnocence	AIN1-13_AINNL0013	Lot# MB15NO4113	TC00821292	G019	0.0107	ug/ml	6625	0.46							20220328_SR2_Omi_COM
AB01974185	01	Ainno_16251	Ainnocence	AIN1-13_AINNL0013	Lot# MB15NO4113	TC00821291	G019	0.0107	ug/ml	5525	0.03							20220328_SR2_Omi_COM
AB01974185	01	Ainno_16251	Ainnocence	AIN1-13_AINNL0013	Lot# MB15NO4113	TC00821292	G020	0.00339	ug/ml	6000	-0.33							20220328_SR2_Omi_COM
AB01974185	01	Ainno_16251	Ainnocence	AIN1-13_AINNL0013	Lot# MB15NO4113	TC00821291	G020	0.00339	ug/ml	6075	0.84							20220328_SR2_Omi_COM
AB01974185	01	Ainno_16251	Ainnocence	AIN1-13_AINNL0013	Lot# MB15NO4113	TC00821292	G021	0.00107	ug/ml	4125	-2.71							20220328_SR2_Omi_COM
AB01974185	01	Ainno_16251	Ainnocence	AIN1-13_AINNL0013	Lot# MB15NO4113	TC00821291	G021	0.00107	ug/ml	3650	-2.74							20220328_SR2_Omi_COM
AB01974185	01	Ainno_16251	Ainnocence	AIN1-13_AINNL0013	Lot# MB15NO4113	TC00821292	G022	0.000339	ug/ml	7075	1.03							20220328_SR2_Omi_COM
AB01974185	01	Ainno_16251	Ainnocence	AIN1-13_AINNL0013	Lot# MB15NO4113	TC00821291	G022	0.000339	ug/ml	6275	1.13							20220328_SR2_Omi_COM
AB01974170	01	Ainno_16251	Ainnocence	AIN1-18_AINNL0018	Lot# MB15NO4118	TC00821292	H003	11.22	ug/ml	6950	0.87	>11.22	Inactive	0.13	1.46	>9999	20	20220328_SR2_Omi_COM
AB01974170	01	Ainno_16251	Ainnocence	AIN1-18_AINNL0018	Lot# MB15NO4118	TC00821291	H003	11.22	ug/ml	5875	0.54							20220328_SR2_Omi_COM
AB01974170	01	Ainno_16251	Ainnocence	AIN1-18_AINNL0018	Lot# MB15NO4118	TC00821292	H004	3.55	ug/ml	7325	1.35							20220328_SR2_Omi_COM
AB01974170	01	Ainno_16251	Ainnocence	AIN1-18_AINNL0018	Lot# MB15NO4118	TC00821291	H004	3.55	ug/ml	6425	1.35							20220328_SR2_Omi_COM
AB01974170	01	Ainno_16251	Ainnocence	AIN1-18_AINNL0018	Lot# MB15NO4118	TC00821292	H005	1.12	ug/ml	7275	1.29							20220328_SR2_Omi_COM
AB01974170	01	Ainno_16251	Ainnocence	AIN1-18_AINNL0018	Lot# MB15NO4118	TC00821291	H005	1.12	ug/ml	4975	-0.78							20220328_SR2_Omi_COM
AB01974170	01	Ainno_16251	Ainnocence	AIN1-18_AINNL0018	Lot# MB15NO4118	TC00821292	H006	0.354	ug/ml	5875	-0.49							20220328_SR2_Omi_COM
AB01974170	01	Ainno_16251	Ainnocence	AIN1-18_AINNL0018	Lot# MB15NO4118	TC00821291	H006	0.354	ug/ml	5675	0.25							20220328_SR2_Omi_COM
AB01974170	01	Ainno_16251	Ainnocence	AIN1-18_AINNL0018	Lot# MB15NO4118	TC00821292	H007	0.112	ug/ml	5200	-1.34							20220328_SR2_Omi_COM
AB01974170	01	Ainno_16251	Ainnocence	AIN1-18_AINNL0018	Lot# MB15NO4118	TC00821291	H007	0.112	ug/ml	5100	-0.6							20220328_SR2_Omi_COM
AB01974170	01	Ainno_16251	Ainnocence	AIN1-18_AINNL0018	Lot# MB15NO4118	TC00821292	H008	0.0354	ug/ml	7525	1.6							20220328_SR2_Omi_COM
AB01974170	01	Ainno_16251	Ainnocence	AIN1-18_AINNL0018	Lot# MB15NO4118	TC00821291	H008	0.0354	ug/ml	8600	4.56							20220328_SR2_Omi_COM
AB01974170	01	Ainno_16251	Ainnocence	AIN1-18_AINNL0018	Lot# MB15NO4118	TC00821292	H009	0.0112	ug/ml	6850	0.75							20220328_SR2_Omi_COM
AB01974170	01	Ainno_16251	Ainnocence	AIN1-18_AINNL0018	Lot# MB15NO4118	TC00821291	H009	0.0112	ug/ml	7100	2.35							20220328_SR2_Omi_COM
AB01974170	01	Ainno_16251	Ainnocence	AIN1-18_AINNL0018	Lot# MB15NO4118	TC00821292	H010	0.00354	ug/ml	5475	-0.99							20220328_SR2_Omi_COM
AB01974170	01	Ainno_16251	Ainnocence	AIN1-18_AINNL0018	Lot# MB15NO4118	TC00821291	H010	0.00354	ug/ml	5525	0.03							20220328_SR2_Omi_COM
AB01974170	01	Ainno_16251	Ainnocence	AIN1-18_AINNL0018	Lot# MB15NO4118	TC00821292	H011	0.00112	ug/ml	7175	1.16							20220328_SR2_Omi_COM
AB01974170	01	Ainno_16251	Ainnocence	AIN1-18_AINNL0018	Lot# MB15NO4118	TC00821291	H011	0.00112	ug/ml	4850	-0.97							20220328_SR2_Omi_COM
AB01974170	01	Ainno_16251	Ainnocence	AIN1-18_AINNL0018	Lot# MB15NO4118	TC00821292	H012	0.000354	ug/ml	5225	-1.31							20220328_SR2_Omi_COM
AB01974170	01	Ainno_16251	Ainnocence	AIN1-18_AINNL0018	Lot# MB15NO4118	TC00821291	H012	0.000354	ug/ml	5475	-0.05							20220328_SR2_Omi_COM
AB01974186	01	Ainno_16251	Ainnocence	AIN1-15_AINNL0015	Lot# MB15NO4115	TC00821292	H013	10.78	ug/ml	6575	0.4	>10.78	Inactive	0.15	1.98	>9999	20	20220328_SR2_Omi_COM
AB01974186	01	Ainno_16251	Ainnocence	AIN1-15_AINNL0015	Lot# MB15NO4115	TC00821291	H013	10.78	ug/ml	4200	-1.93							20220328_SR2_Omi_COM
AB01974186	01	Ainno_16251	Ainnocence	AIN1-15_AINNL0015	Lot# MB15NO4115	TC00821292	H014	3.41	ug/ml	6975	0.91							20220328_SR2_Omi_COM
AB01974186	01	Ainno_16251	Ainnocence	AIN1-15_AINNL0015	Lot# MB15NO4115	TC00821291	H014	3.41	ug/ml	6825	1.94							20220328_SR2_Omi_COM
AB01974186	01	Ainno_16251	Ainnocence	AIN1-15_AINNL0015	Lot# MB15NO4115	TC00821292	H015	1.08	ug/ml	7525	1.6							20220328_SR2_Omi_COM
AB01974186	01	Ainno_16251	Ainnocence	AIN1-15_AINNL0015	Lot# MB15NO4115	TC00821291	H015	1.08	ug/ml	5625	0.17							20220328_SR2_Omi_COM
AB01974186	01	Ainno_16251	Ainnocence	AIN1-15_AINNL0015	Lot# MB15NO4115	TC00821292	H016	0.342	ug/ml	7050	1							20220328_SR2_Omi_COM
AB01974186	01	Ainno_16251	Ainnocence	AIN1-15_AINNL0015	Lot# MB15NO4115	TC00821291	H016	0.342	ug/ml	4525	-1.45							20220328_SR2_Omi_COM
AB01974186	01	Ainno_16251	Ainnocence	AIN1-15_AINNL0015	Lot# MB15NO4115	TC00821292	H017	0.108	ug/ml	10025	4.77							20220328_SR2_Omi_COM
AB01974186	01	Ainno_16251	Ainnocence	AIN1-15_AINNL0015	Lot# MB15NO4115	TC00821291	H017	0.108	ug/ml	8375	4.23							20220328_SR2_Omi_COM
AB01974186	01	Ainno_16251	Ainnocence	AIN1-15_AINNL0015	Lot# MB15NO4115	TC00821292	H018	0.0342	ug/ml	5500	-0.96							20220328_SR2_Omi_COM
AB01974186	01	Ainno_16251	Ainnocence	AIN1-15_AINNL0015	Lot# MB15NO4115	TC00821291	H018	0.0342	ug/ml	5375	-0.19							20220328_SR2_Omi_COM
AB01974186	01	Ainno_16251	Ainnocence	AIN1-15_AINNL0015	Lot# MB15NO4115	TC00821292	H019	0.0108	ug/ml	7150	1.13							20220328_SR2_Omi_COM
AB01974186	01	Ainno_16251	Ainnocence	AIN1-15_AINNL0015	Lot# MB15NO4115	TC00821291	H019	0.0108	ug/ml	5775	0.4							20220328_SR2_Omi_COM
AB01974186	01	Ainno_16251	Ainnocence	AIN1-15_AINNL0015	Lot# MB15NO4115	TC00821292	H020	0.00342	ug/ml	4975	-1.63							20220328_SR2_Omi_COM
AB01974186	01	Ainno_16251	Ainnocence	AIN1-15_AINNL0015	Lot# MB15NO4115	TC00821291	H020	0.00342	ug/ml	4125	-2.04							20220328_SR2_Omi_COM
AB01974186	01	Ainno_16251	Ainnocence	AIN1-15_AINNL0015	Lot# MB15NO4115	TC00821292	H021	0.00108	ug/ml	6025	-0.3							20220328_SR2_Omi_COM
AB01974186	01	Ainno_16251	Ainnocence	AIN1-15_AINNL0015	Lot# MB15NO4115	TC00821291	H021	0.00108	ug/ml	5200	-0.45							20220328_SR2_Omi_COM
AB01974186	01	Ainno_16251	Ainnocence	AIN1-15_AINNL0015	Lot# MB15NO4115	TC00821292	H022	0.000342	ug/ml	5975	-0.36							20220328_SR2_Omi_COM
AB01974186	01	Ainno_16251	Ainnocence	AIN1-15_AINNL0015	Lot# MB15NO4115	TC00821291	H022	0.000342	ug/ml	3450	-3.03							20220328_SR2_Omi_COM
AB01974171	01	Ainno_16251	Ainnocence	AIN1-21_AINNL0021	Lot# MB15NO4121	TC00821292	I003	11	ug/ml	5375	-1.12	>11.00	Inactive	1	2.83	>9999	20	20220328_SR2_Omi_COM
AB01974171	01	Ainno_16251	Ainnocence	AIN1-21_AINNL0021	Lot# MB15NO4121	TC00821291	I003	11	ug/ml	7200	2.5							20220328_SR2_Omi_COM
AB01974171	01	Ainno_16251	Ainnocence	AIN1-21_AINNL0021	Lot# MB15NO4121	TC00821292	I004	3.48	ug/ml	8125	2.36							20220328_SR2_Omi_COM
AB01974171	01	Ainno_16251	Ainnocence	AIN1-21_AINNL0021	Lot# MB15NO4121	TC00821291	I004	3.48	ug/ml	5075	-0.64							20220328_SR2_Omi_COM
AB01974171	01	Ainno_16251	Ainnocence	AIN1-21_AINNL0021	Lot# MB15NO4121	TC00821292	I005	1.1	ug/ml	5425	-1.06							20220328_SR2_Omi_COM
AB01974171	01	Ainno_16251	Ainnocence	AIN1-21_AINNL0021	Lot# MB15NO4121	TC00821291	I005	1.1	ug/ml	6275	1.13							20220328_SR2_Omi_COM
AB01974171	01	Ainno_16251	Ainnocence	AIN1-21_AINNL0021	Lot# MB15NO4121	TC00821292	I006	0.348	ug/ml	13525	9.21							20220328_SR2_Omi_COM
AB01974171	01	Ainno_16251	Ainnocence	AIN1-21_AINNL0021	Lot# MB15NO4121	TC00821291	I006	0.348	ug/ml	6225	1.06							20220328_SR2_Omi_COM
AB01974171	01	Ainno_16251	Ainnocence	AIN1-21_AINNL0021	Lot# MB15NO4121	TC00821292	I007	0.11	ug/ml	7650	1.76							20220328_SR2_Omi_COM
AB01974171	01	Ainno_16251	Ainnocence	AIN1-21_AINNL0021	Lot# MB15NO4121	TC00821291	I007	0.11	ug/ml	6025	0.76							20220328_SR2_Omi_COM
AB01974171	01	Ainno_16251	Ainnocence	AIN1-21_AINNL0021	Lot# MB15NO4121	TC00821292	I008	0.0348	ug/ml	8000	2.2							20220328_SR2_Omi_COM
AB01974171	01	Ainno_16251	Ainnocence	AIN1-21_AINNL0021	Lot# MB15NO4121	TC00821291	I008	0.0348	ug/ml	5925	0.62							20220328_SR2_Omi_COM
AB01974171	01	Ainno_16251	Ainnocence	AIN1-21_AINNL0021	Lot# MB15NO4121	TC00821292	I009	0.011	ug/ml	4350	-2.42							20220328_SR2_Omi_COM
AB01974171	01	Ainno_16251	Ainnocence	AIN1-21_AINNL0021	Lot# MB15NO4121	TC00821291	I009	0.011	ug/ml	4500	-1.49							20220328_SR2_Omi_COM
AB01974171	01	Ainno_16251	Ainnocence	AIN1-21_AINNL0021	Lot# MB15NO4121	TC00821292	I010	0.00348	ug/ml	9225	3.76							20220328_SR2_Omi_COM
AB01974171	01	Ainno_16251	Ainnocence	AIN1-21_AINNL0021	Lot# MB15NO4121	TC00821291	I010	0.00348	ug/ml	6650	1.69							20220328_SR2_Omi_COM
AB01974171	01	Ainno_16251	Ainnocence	AIN1-21_AINNL0021	Lot# MB15NO4121	TC00821292	I011	0.0011	ug/ml	7575	1.67							20220328_SR2_Omi_COM
AB01974171	01	Ainno_16251	Ainnocence	AIN1-21_AINNL0021	Lot# MB15NO4121	TC00821291	I011	0.0011	ug/ml	6275	1.13							20220328_SR2_Omi_COM
AB01974171	01	Ainno_16251	Ainnocence	AIN1-21_AINNL0021	Lot# MB15NO4121	TC00821292	I012	0.000348	ug/ml	5600	-0.84							20220328_SR2_Omi_COM
AB01974171	01	Ainno_16251	Ainnocence	AIN1-21_AINNL0021	Lot# MB15NO4121	TC00821291	I012	0.000348	ug/ml	6850	1.98							20220328_SR2_Omi_COM
AB01974187	01	Ainno_16251	Ainnocence	AIN1-38_AINNL0038	Lot# MB15NO4138	TC00821292	I013	10.89	ug/ml	4575	-2.14	>10.89	Inactive	-5.72	2.25	0.01	20	20220328_SR2_Omi_COM
AB01974187	01	Ainno_16251	Ainnocence	AIN1-38_AINNL0038	Lot# MB15NO4138	TC00821291	I013	10.89	ug/ml	3675	-2.7							20220328_SR2_Omi_COM
AB01974187	01	Ainno_16251	Ainnocence	AIN1-38_AINNL0038	Lot# MB15NO4138	TC00821292	I014	3.45	ug/ml	7250	1.25							20220328_SR2_Omi_COM
AB01974187	01	Ainno_16251	Ainnocence	AIN1-38_AINNL0038	Lot# MB15NO4138	TC00821291	I014	3.45	ug/ml	10150	6.85							20220328_SR2_Omi_COM
AB01974187	01	Ainno_16251	Ainnocence	AIN1-38_AINNL0038	Lot# MB15NO4138	TC00821292	I015	1.09	ug/ml	4600	-2.1							20220328_SR2_Omi_COM
AB01974187	01	Ainno_16251	Ainnocence	AIN1-38_AINNL0038	Lot# MB15NO4138	TC00821291	I015	1.09	ug/ml	5950	0.65							20220328_SR2_Omi_COM
AB01974187	01	Ainno_16251	Ainnocence	AIN1-38_AINNL0038	Lot# MB15NO4138	TC00821292	I016	0.345	ug/ml	4900	-1.72							20220328_SR2_Omi_COM
AB01974187	01	Ainno_16251	Ainnocence	AIN1-38_AINNL0038	Lot# MB15NO4138	TC00821291	I016	0.345	ug/ml	4825	-1.01							20220328_SR2_Omi_COM
AB01974187	01	Ainno_16251	Ainnocence	AIN1-38_AINNL0038	Lot# MB15NO4138	TC00821292	I017	0.109	ug/ml	5975	-0.36							20220328_SR2_Omi_COM
AB01974187	01	Ainno_16251	Ainnocence	AIN1-38_AINNL0038	Lot# MB15NO4138	TC00821291	I017	0.109	ug/ml	3725	-2.63							20220328_SR2_Omi_COM
AB01974187	01	Ainno_16251	Ainnocence	AIN1-38_AINNL0038	Lot# MB15NO4138	TC00821292	I018	0.0345	ug/ml	4425	-2.33							20220328_SR2_Omi_COM
AB01974187	01	Ainno_16251	Ainnocence	AIN1-38_AINNL0038	Lot# MB15NO4138	TC00821291	I018	0.0345	ug/ml	5300	-0.31							20220328_SR2_Omi_COM
AB01974187	01	Ainno_16251	Ainnocence	AIN1-38_AINNL0038	Lot# MB15NO4138	TC00821292	I019	0.0109	ug/ml	6400	0.18							20220328_SR2_Omi_COM
AB01974187	01	Ainno_16251	Ainnocence	AIN1-38_AINNL0038	Lot# MB15NO4138	TC00821291	I019	0.0109	ug/ml	4075	-2.11							20220328_SR2_Omi_COM
AB01974187	01	Ainno_16251	Ainnocence	AIN1-38_AINNL0038	Lot# MB15NO4138	TC00821292	I020	0.00345	ug/ml	6925	0.84							20220328_SR2_Omi_COM
AB01974187	01	Ainno_16251	Ainnocence	AIN1-38_AINNL0038	Lot# MB15NO4138	TC00821291	I020	0.00345	ug/ml	6425	1.35							20220328_SR2_Omi_COM
AB01974187	01	Ainno_16251	Ainnocence	AIN1-38_AINNL0038	Lot# MB15NO4138	TC00821292	I021	0.00109	ug/ml	5325	-1.19							20220328_SR2_Omi_COM
AB01974187	01	Ainno_16251	Ainnocence	AIN1-38_AINNL0038	Lot# MB15NO4138	TC00821291	I021	0.00109	ug/ml	5350	-0.23							20220328_SR2_Omi_COM
AB01974187	01	Ainno_16251	Ainnocence	AIN1-38_AINNL0038	Lot# MB15NO4138	TC00821292	I022	0.000345	ug/ml	9025	3.5							20220328_SR2_Omi_COM
AB01974187	01	Ainno_16251	Ainnocence	AIN1-38_AINNL0038	Lot# MB15NO4138	TC00821291	I022	0.000345	ug/ml	7025	2.24							20220328_SR2_Omi_COM
AB01974172	01	Ainno_16251	Ainnocence	AIN1-22_AINNL0022	Lot# MB15NO4122	TC00821292	J003	10.22	ug/ml	7400	1.44	>10.22	Inactive	1.65	2.06	403.2	20	20220328_SR2_Omi_COM
AB01974172	01	Ainno_16251	Ainnocence	AIN1-22_AINNL0022	Lot# MB15NO4122	TC00821291	J003	10.22	ug/ml	7900	3.53							20220328_SR2_Omi_COM
AB01974172	01	Ainno_16251	Ainnocence	AIN1-22_AINNL0022	Lot# MB15NO4122	TC00821292	J004	3.23	ug/ml	6950	0.87							20220328_SR2_Omi_COM
AB01974172	01	Ainno_16251	Ainnocence	AIN1-22_AINNL0022	Lot# MB15NO4122	TC00821291	J004	3.23	ug/ml	6075	0.84							20220328_SR2_Omi_COM
AB01974172	01	Ainno_16251	Ainnocence	AIN1-22_AINNL0022	Lot# MB15NO4122	TC00821292	J005	1.02	ug/ml	5200	-1.34							20220328_SR2_Omi_COM
AB01974172	01	Ainno_16251	Ainnocence	AIN1-22_AINNL0022	Lot# MB15NO4122	TC00821291	J005	1.02	ug/ml	4400	-1.63							20220328_SR2_Omi_COM
AB01974172	01	Ainno_16251	Ainnocence	AIN1-22_AINNL0022	Lot# MB15NO4122	TC00821292	J006	0.323	ug/ml	6725	0.59							20220328_SR2_Omi_COM
AB01974172	01	Ainno_16251	Ainnocence	AIN1-22_AINNL0022	Lot# MB15NO4122	TC00821291	J006	0.323	ug/ml	4000	-2.22							20220328_SR2_Omi_COM
AB01974172	01	Ainno_16251	Ainnocence	AIN1-22_AINNL0022	Lot# MB15NO4122	TC00821292	J007	0.102	ug/ml	7975	2.17							20220328_SR2_Omi_COM
AB01974172	01	Ainno_16251	Ainnocence	AIN1-22_AINNL0022	Lot# MB15NO4122	TC00821291	J007	0.102	ug/ml	6775	1.87							20220328_SR2_Omi_COM
AB01974172	01	Ainno_16251	Ainnocence	AIN1-22_AINNL0022	Lot# MB15NO4122	TC00821292	J008	0.0323	ug/ml	7625	1.73							20220328_SR2_Omi_COM
AB01974172	01	Ainno_16251	Ainnocence	AIN1-22_AINNL0022	Lot# MB15NO4122	TC00821291	J008	0.0323	ug/ml	5225	-0.42							20220328_SR2_Omi_COM
AB01974172	01	Ainno_16251	Ainnocence	AIN1-22_AINNL0022	Lot# MB15NO4122	TC00821292	J009	0.0102	ug/ml	9850	4.55							20220328_SR2_Omi_COM
AB01974172	01	Ainno_16251	Ainnocence	AIN1-22_AINNL0022	Lot# MB15NO4122	TC00821291	J009	0.0102	ug/ml	7200	2.5							20220328_SR2_Omi_COM
AB01974172	01	Ainno_16251	Ainnocence	AIN1-22_AINNL0022	Lot# MB15NO4122	TC00821292	J010	0.00323	ug/ml	6525	0.34							20220328_SR2_Omi_COM
AB01974172	01	Ainno_16251	Ainnocence	AIN1-22_AINNL0022	Lot# MB15NO4122	TC00821291	J010	0.00323	ug/ml	3850	-2.44							20220328_SR2_Omi_COM
AB01974172	01	Ainno_16251	Ainnocence	AIN1-22_AINNL0022	Lot# MB15NO4122	TC00821292	J011	0.00102	ug/ml	9300	3.85							20220328_SR2_Omi_COM
AB01974172	01	Ainno_16251	Ainnocence	AIN1-22_AINNL0022	Lot# MB15NO4122	TC00821291	J011	0.00102	ug/ml	4200	-1.93							20220328_SR2_Omi_COM
AB01974172	01	Ainno_16251	Ainnocence	AIN1-22_AINNL0022	Lot# MB15NO4122	TC00821292	J012	0.000323	ug/ml	6800	0.68							20220328_SR2_Omi_COM
AB01974172	01	Ainno_16251	Ainnocence	AIN1-22_AINNL0022	Lot# MB15NO4122	TC00821291	J012	0.000323	ug/ml	5025	-0.71							20220328_SR2_Omi_COM
AB01974188	01	Ainno_16251	Ainnocence	AIN1-39_AINNL0039	Lot# MB15NO4139	TC00821292	J013	10.67	ug/ml	6050	-0.27	>10.67	Inactive	-0.25	4.74	0	20	20220328_SR2_Omi_COM
AB01974188	01	Ainno_16251	Ainnocence	AIN1-39_AINNL0039	Lot# MB15NO4139	TC00821291	J013	10.67	ug/ml	5750	0.36							20220328_SR2_Omi_COM
AB01974188	01	Ainno_16251	Ainnocence	AIN1-39_AINNL0039	Lot# MB15NO4139	TC00821292	J014	3.38	ug/ml	4200	-2.61							20220328_SR2_Omi_COM
AB01974188	01	Ainno_16251	Ainnocence	AIN1-39_AINNL0039	Lot# MB15NO4139	TC00821291	J014	3.38	ug/ml	3800	-2.52							20220328_SR2_Omi_COM
AB01974188	01	Ainno_16251	Ainnocence	AIN1-39_AINNL0039	Lot# MB15NO4139	TC00821292	J015	1.07	ug/ml	3825	-3.09							20220328_SR2_Omi_COM
AB01974188	01	Ainno_16251	Ainnocence	AIN1-39_AINNL0039	Lot# MB15NO4139	TC00821291	J015	1.07	ug/ml	4225	-1.89							20220328_SR2_Omi_COM
AB01974188	01	Ainno_16251	Ainnocence	AIN1-39_AINNL0039	Lot# MB15NO4139	TC00821292	J016	0.339	ug/ml	5400	-1.09							20220328_SR2_Omi_COM
AB01974188	01	Ainno_16251	Ainnocence	AIN1-39_AINNL0039	Lot# MB15NO4139	TC00821291	J016	0.339	ug/ml	5275	-0.34							20220328_SR2_Omi_COM
AB01974188	01	Ainno_16251	Ainnocence	AIN1-39_AINNL0039	Lot# MB15NO4139	TC00821292	J017	0.107	ug/ml	5975	-0.36							20220328_SR2_Omi_COM
AB01974188	01	Ainno_16251	Ainnocence	AIN1-39_AINNL0039	Lot# MB15NO4139	TC00821291	J017	0.107	ug/ml	4975	-0.78							20220328_SR2_Omi_COM
AB01974188	01	Ainno_16251	Ainnocence	AIN1-39_AINNL0039	Lot# MB15NO4139	TC00821292	J018	0.0339	ug/ml	5100	-1.47							20220328_SR2_Omi_COM
AB01974188	01	Ainno_16251	Ainnocence	AIN1-39_AINNL0039	Lot# MB15NO4139	TC00821291	J018	0.0339	ug/ml	4650	-1.26							20220328_SR2_Omi_COM
AB01974188	01	Ainno_16251	Ainnocence	AIN1-39_AINNL0039	Lot# MB15NO4139	TC00821292	J019	0.0107	ug/ml	6525	0.34							20220328_SR2_Omi_COM
AB01974188	01	Ainno_16251	Ainnocence	AIN1-39_AINNL0039	Lot# MB15NO4139	TC00821291	J019	0.0107	ug/ml	7850	3.46							20220328_SR2_Omi_COM
AB01974188	01	Ainno_16251	Ainnocence	AIN1-39_AINNL0039	Lot# MB15NO4139	TC00821292	J020	0.00339	ug/ml	5800	-0.58							20220328_SR2_Omi_COM
AB01974188	01	Ainno_16251	Ainnocence	AIN1-39_AINNL0039	Lot# MB15NO4139	TC00821291	J020	0.00339	ug/ml	18600	19.31							20220328_SR2_Omi_COM
AB01974188	01	Ainno_16251	Ainnocence	AIN1-39_AINNL0039	Lot# MB15NO4139	TC00821292	J021	0.00107	ug/ml	7475	1.54							20220328_SR2_Omi_COM
AB01974188	01	Ainno_16251	Ainnocence	AIN1-39_AINNL0039	Lot# MB15NO4139	TC00821291	J021	0.00107	ug/ml	6325	1.21							20220328_SR2_Omi_COM
AB01974188	01	Ainno_16251	Ainnocence	AIN1-39_AINNL0039	Lot# MB15NO4139	TC00821292	J022	0.000339	ug/ml	5850	-0.52							20220328_SR2_Omi_COM
AB01974188	01	Ainno_16251	Ainnocence	AIN1-39_AINNL0039	Lot# MB15NO4139	TC00821291	J022	0.000339	ug/ml	4375	-1.67							20220328_SR2_Omi_COM
AB01974173	01	Ainno_16251	Ainnocence	AIN1-26_AINNL0026	Lot# MB15NO4126	TC00821292	K003	10.89	ug/ml	10050	4.8	>10.89	Inactive	0.18	1.91	>9999	20	20220328_SR2_Omi_COM
AB01974173	01	Ainno_16251	Ainnocence	AIN1-26_AINNL0026	Lot# MB15NO4126	TC00821291	K003	10.89	ug/ml	4725	-1.15							20220328_SR2_Omi_COM
AB01974173	01	Ainno_16251	Ainnocence	AIN1-26_AINNL0026	Lot# MB15NO4126	TC00821292	K004	3.45	ug/ml	6425	0.21							20220328_SR2_Omi_COM
AB01974173	01	Ainno_16251	Ainnocence	AIN1-26_AINNL0026	Lot# MB15NO4126	TC00821291	K004	3.45	ug/ml	5750	0.36							20220328_SR2_Omi_COM
AB01974173	01	Ainno_16251	Ainnocence	AIN1-26_AINNL0026	Lot# MB15NO4126	TC00821292	K005	1.09	ug/ml	6800	0.68							20220328_SR2_Omi_COM
AB01974173	01	Ainno_16251	Ainnocence	AIN1-26_AINNL0026	Lot# MB15NO4126	TC00821291	K005	1.09	ug/ml	5825	0.47							20220328_SR2_Omi_COM
AB01974173	01	Ainno_16251	Ainnocence	AIN1-26_AINNL0026	Lot# MB15NO4126	TC00821292	K006	0.345	ug/ml	5575	-0.87							20220328_SR2_Omi_COM
AB01974173	01	Ainno_16251	Ainnocence	AIN1-26_AINNL0026	Lot# MB15NO4126	TC00821291	K006	0.345	ug/ml	8100	3.82							20220328_SR2_Omi_COM
AB01974173	01	Ainno_16251	Ainnocence	AIN1-26_AINNL0026	Lot# MB15NO4126	TC00821292	K007	0.109	ug/ml	8675	3.06							20220328_SR2_Omi_COM
AB01974173	01	Ainno_16251	Ainnocence	AIN1-26_AINNL0026	Lot# MB15NO4126	TC00821291	K007	0.109	ug/ml	6000	0.73							20220328_SR2_Omi_COM
AB01974173	01	Ainno_16251	Ainnocence	AIN1-26_AINNL0026	Lot# MB15NO4126	TC00821292	K008	0.0345	ug/ml	7225	1.22							20220328_SR2_Omi_COM
AB01974173	01	Ainno_16251	Ainnocence	AIN1-26_AINNL0026	Lot# MB15NO4126	TC00821291	K008	0.0345	ug/ml	6625	1.65							20220328_SR2_Omi_COM
AB01974173	01	Ainno_16251	Ainnocence	AIN1-26_AINNL0026	Lot# MB15NO4126	TC00821292	K009	0.0109	ug/ml	3925	-2.96							20220328_SR2_Omi_COM
AB01974173	01	Ainno_16251	Ainnocence	AIN1-26_AINNL0026	Lot# MB15NO4126	TC00821291	K009	0.0109	ug/ml	5975	0.69							20220328_SR2_Omi_COM
AB01974173	01	Ainno_16251	Ainnocence	AIN1-26_AINNL0026	Lot# MB15NO4126	TC00821292	K010	0.00345	ug/ml	6250	-0.01							20220328_SR2_Omi_COM
AB01974173	01	Ainno_16251	Ainnocence	AIN1-26_AINNL0026	Lot# MB15NO4126	TC00821291	K010	0.00345	ug/ml	5725	0.32							20220328_SR2_Omi_COM
AB01974173	01	Ainno_16251	Ainnocence	AIN1-26_AINNL0026	Lot# MB15NO4126	TC00821292	K011	0.00109	ug/ml	4325	-2.45							20220328_SR2_Omi_COM
AB01974173	01	Ainno_16251	Ainnocence	AIN1-26_AINNL0026	Lot# MB15NO4126	TC00821291	K011	0.00109	ug/ml	4550	-1.41							20220328_SR2_Omi_COM
AB01974173	01	Ainno_16251	Ainnocence	AIN1-26_AINNL0026	Lot# MB15NO4126	TC00821292	K012	0.000345	ug/ml	5425	-1.06							20220328_SR2_Omi_COM
AB01974173	01	Ainno_16251	Ainnocence	AIN1-26_AINNL0026	Lot# MB15NO4126	TC00821291	K012	0.000345	ug/ml	4625	-1.3							20220328_SR2_Omi_COM
AB01974189	01	Ainno_16251	Ainnocence	AIN1-40_AINNL0040	Lot# MB15NO4140	TC00821292	K013	10.78	ug/ml	6850	0.75	>10.78	Inactive	0.24	2.29	>9999	20	20220328_SR2_Omi_COM
AB01974189	01	Ainno_16251	Ainnocence	AIN1-40_AINNL0040	Lot# MB15NO4140	TC00821291	K013	10.78	ug/ml	5650	0.21							20220328_SR2_Omi_COM
AB01974189	01	Ainno_16251	Ainnocence	AIN1-40_AINNL0040	Lot# MB15NO4140	TC00821292	K014	3.41	ug/ml	6000	-0.33							20220328_SR2_Omi_COM
AB01974189	01	Ainno_16251	Ainnocence	AIN1-40_AINNL0040	Lot# MB15NO4140	TC00821291	K014	3.41	ug/ml	6450	1.39							20220328_SR2_Omi_COM
AB01974189	01	Ainno_16251	Ainnocence	AIN1-40_AINNL0040	Lot# MB15NO4140	TC00821292	K015	1.08	ug/ml	8200	2.46							20220328_SR2_Omi_COM
AB01974189	01	Ainno_16251	Ainnocence	AIN1-40_AINNL0040	Lot# MB15NO4140	TC00821291	K015	1.08	ug/ml	5225	-0.42							20220328_SR2_Omi_COM
AB01974189	01	Ainno_16251	Ainnocence	AIN1-40_AINNL0040	Lot# MB15NO4140	TC00821292	K016	0.342	ug/ml	9125	3.63							20220328_SR2_Omi_COM
AB01974189	01	Ainno_16251	Ainnocence	AIN1-40_AINNL0040	Lot# MB15NO4140	TC00821291	K016	0.342	ug/ml	4825	-1.01							20220328_SR2_Omi_COM
AB01974189	01	Ainno_16251	Ainnocence	AIN1-40_AINNL0040	Lot# MB15NO4140	TC00821292	K017	0.108	ug/ml	6375	0.15							20220328_SR2_Omi_COM
AB01974189	01	Ainno_16251	Ainnocence	AIN1-40_AINNL0040	Lot# MB15NO4140	TC00821291	K017	0.108	ug/ml	3400	-3.11							20220328_SR2_Omi_COM
AB01974189	01	Ainno_16251	Ainnocence	AIN1-40_AINNL0040	Lot# MB15NO4140	TC00821292	K018	0.0342	ug/ml	7525	1.6							20220328_SR2_Omi_COM
AB01974189	01	Ainno_16251	Ainnocence	AIN1-40_AINNL0040	Lot# MB15NO4140	TC00821291	K018	0.0342	ug/ml	3000	-3.7							20220328_SR2_Omi_COM
AB01974189	01	Ainno_16251	Ainnocence	AIN1-40_AINNL0040	Lot# MB15NO4140	TC00821292	K019	0.0108	ug/ml	4450	-2.29							20220328_SR2_Omi_COM
AB01974189	01	Ainno_16251	Ainnocence	AIN1-40_AINNL0040	Lot# MB15NO4140	TC00821291	K019	0.0108	ug/ml	7675	3.2							20220328_SR2_Omi_COM
AB01974189	01	Ainno_16251	Ainnocence	AIN1-40_AINNL0040	Lot# MB15NO4140	TC00821292	K020	0.00342	ug/ml	6900	0.81							20220328_SR2_Omi_COM
AB01974189	01	Ainno_16251	Ainnocence	AIN1-40_AINNL0040	Lot# MB15NO4140	TC00821291	K020	0.00342	ug/ml	4275	-1.82							20220328_SR2_Omi_COM
AB01974189	01	Ainno_16251	Ainnocence	AIN1-40_AINNL0040	Lot# MB15NO4140	TC00821292	K021	0.00108	ug/ml	5400	-1.09							20220328_SR2_Omi_COM
AB01974189	01	Ainno_16251	Ainnocence	AIN1-40_AINNL0040	Lot# MB15NO4140	TC00821291	K021	0.00108	ug/ml	8650	4.64							20220328_SR2_Omi_COM
AB01974189	01	Ainno_16251	Ainnocence	AIN1-40_AINNL0040	Lot# MB15NO4140	TC00821292	K022	0.000342	ug/ml	6675	0.53							20220328_SR2_Omi_COM
AB01974189	01	Ainno_16251	Ainnocence	AIN1-40_AINNL0040	Lot# MB15NO4140	TC00821291	K022	0.000342	ug/ml	4100	-2.08							20220328_SR2_Omi_COM
AB01974174	01	Ainno_16251	Ainnocence	AIN1-28_AINNL0028	Lot# MB15NO4128	TC00821292	L003	9.67	ug/ml	7650	1.76	>9.67	Inactive	0.21	1.98	>9999	20	20220328_SR2_Omi_COM
AB01974174	01	Ainno_16251	Ainnocence	AIN1-28_AINNL0028	Lot# MB15NO4128	TC00821291	L003	9.67	ug/ml	5425	-0.12							20220328_SR2_Omi_COM
AB01974174	01	Ainno_16251	Ainnocence	AIN1-28_AINNL0028	Lot# MB15NO4128	TC00821292	L004	3.06	ug/ml	5650	-0.77							20220328_SR2_Omi_COM
AB01974174	01	Ainno_16251	Ainnocence	AIN1-28_AINNL0028	Lot# MB15NO4128	TC00821291	L004	3.06	ug/ml	7025	2.24							20220328_SR2_Omi_COM
AB01974174	01	Ainno_16251	Ainnocence	AIN1-28_AINNL0028	Lot# MB15NO4128	TC00821292	L005	0.968	ug/ml	6550	0.37							20220328_SR2_Omi_COM
AB01974174	01	Ainno_16251	Ainnocence	AIN1-28_AINNL0028	Lot# MB15NO4128	TC00821291	L005	0.968	ug/ml	8500	4.41							20220328_SR2_Omi_COM
AB01974174	01	Ainno_16251	Ainnocence	AIN1-28_AINNL0028	Lot# MB15NO4128	TC00821292	L006	0.306	ug/ml	7750	1.89							20220328_SR2_Omi_COM
AB01974174	01	Ainno_16251	Ainnocence	AIN1-28_AINNL0028	Lot# MB15NO4128	TC00821291	L006	0.306	ug/ml	6175	0.99							20220328_SR2_Omi_COM
AB01974174	01	Ainno_16251	Ainnocence	AIN1-28_AINNL0028	Lot# MB15NO4128	TC00821292	L007	0.0968	ug/ml	5000	-1.6							20220328_SR2_Omi_COM
AB01974174	01	Ainno_16251	Ainnocence	AIN1-28_AINNL0028	Lot# MB15NO4128	TC00821291	L007	0.0968	ug/ml	4950	-0.82							20220328_SR2_Omi_COM
AB01974174	01	Ainno_16251	Ainnocence	AIN1-28_AINNL0028	Lot# MB15NO4128	TC00821292	L008	0.0306	ug/ml	6350	0.11							20220328_SR2_Omi_COM
AB01974174	01	Ainno_16251	Ainnocence	AIN1-28_AINNL0028	Lot# MB15NO4128	TC00821291	L008	0.0306	ug/ml	6900	2.05							20220328_SR2_Omi_COM
AB01974174	01	Ainno_16251	Ainnocence	AIN1-28_AINNL0028	Lot# MB15NO4128	TC00821292	L009	0.00968	ug/ml	8125	2.36							20220328_SR2_Omi_COM
AB01974174	01	Ainno_16251	Ainnocence	AIN1-28_AINNL0028	Lot# MB15NO4128	TC00821291	L009	0.00968	ug/ml	4525	-1.45							20220328_SR2_Omi_COM
AB01974174	01	Ainno_16251	Ainnocence	AIN1-28_AINNL0028	Lot# MB15NO4128	TC00821292	L010	0.00306	ug/ml	4525	-2.2							20220328_SR2_Omi_COM
AB01974174	01	Ainno_16251	Ainnocence	AIN1-28_AINNL0028	Lot# MB15NO4128	TC00821291	L010	0.00306	ug/ml	3800	-2.52							20220328_SR2_Omi_COM
AB01974174	01	Ainno_16251	Ainnocence	AIN1-28_AINNL0028	Lot# MB15NO4128	TC00821292	L011	0.000968	ug/ml	8150	2.39							20220328_SR2_Omi_COM
AB01974174	01	Ainno_16251	Ainnocence	AIN1-28_AINNL0028	Lot# MB15NO4128	TC00821291	L011	0.000968	ug/ml	4825	-1.01							20220328_SR2_Omi_COM
AB01974174	01	Ainno_16251	Ainnocence	AIN1-28_AINNL0028	Lot# MB15NO4128	TC00821292	L012	0.000306	ug/ml	3850	-3.05							20220328_SR2_Omi_COM
AB01974174	01	Ainno_16251	Ainnocence	AIN1-28_AINNL0028	Lot# MB15NO4128	TC00821291	L012	0.000306	ug/ml	4575	-1.37							20220328_SR2_Omi_COM
AB01974190	01	Ainno_16251	Ainnocence	AIN1-41_AINNL0041	Lot# MB15NO4141	TC00821292	L013	10.89	ug/ml	8275	2.55	>10.89	Inactive	5.82	1.8	216.1	20	20220328_SR2_Omi_COM
AB01974190	01	Ainno_16251	Ainnocence	AIN1-41_AINNL0041	Lot# MB15NO4141	TC00821291	L013	10.89	ug/ml	11475	8.8							20220328_SR2_Omi_COM
AB01974190	01	Ainno_16251	Ainnocence	AIN1-41_AINNL0041	Lot# MB15NO4141	TC00821292	L014	3.45	ug/ml	5450	-1.03							20220328_SR2_Omi_COM
AB01974190	01	Ainno_16251	Ainnocence	AIN1-41_AINNL0041	Lot# MB15NO4141	TC00821291	L014	3.45	ug/ml	5550	0.06							20220328_SR2_Omi_COM
AB01974190	01	Ainno_16251	Ainnocence	AIN1-41_AINNL0041	Lot# MB15NO4141	TC00821292	L015	1.09	ug/ml	4925	-1.69							20220328_SR2_Omi_COM
AB01974190	01	Ainno_16251	Ainnocence	AIN1-41_AINNL0041	Lot# MB15NO4141	TC00821291	L015	1.09	ug/ml	5650	0.21							20220328_SR2_Omi_COM
AB01974190	01	Ainno_16251	Ainnocence	AIN1-41_AINNL0041	Lot# MB15NO4141	TC00821292	L016	0.345	ug/ml	6150	-0.14							20220328_SR2_Omi_COM
AB01974190	01	Ainno_16251	Ainnocence	AIN1-41_AINNL0041	Lot# MB15NO4141	TC00821291	L016	0.345	ug/ml	4800	-1.04							20220328_SR2_Omi_COM
AB01974190	01	Ainno_16251	Ainnocence	AIN1-41_AINNL0041	Lot# MB15NO4141	TC00821292	L017	0.109	ug/ml	7000	0.94							20220328_SR2_Omi_COM
AB01974190	01	Ainno_16251	Ainnocence	AIN1-41_AINNL0041	Lot# MB15NO4141	TC00821291	L017	0.109	ug/ml	5400	-0.16							20220328_SR2_Omi_COM
AB01974190	01	Ainno_16251	Ainnocence	AIN1-41_AINNL0041	Lot# MB15NO4141	TC00821292	L018	0.0345	ug/ml	5500	-0.96							20220328_SR2_Omi_COM
AB01974190	01	Ainno_16251	Ainnocence	AIN1-41_AINNL0041	Lot# MB15NO4141	TC00821291	L018	0.0345	ug/ml	6300	1.17							20220328_SR2_Omi_COM
AB01974190	01	Ainno_16251	Ainnocence	AIN1-41_AINNL0041	Lot# MB15NO4141	TC00821292	L019	0.0109	ug/ml	8075	2.3							20220328_SR2_Omi_COM
AB01974190	01	Ainno_16251	Ainnocence	AIN1-41_AINNL0041	Lot# MB15NO4141	TC00821291	L019	0.0109	ug/ml	7125	2.39							20220328_SR2_Omi_COM
AB01974190	01	Ainno_16251	Ainnocence	AIN1-41_AINNL0041	Lot# MB15NO4141	TC00821292	L020	0.00345	ug/ml	7900	2.08							20220328_SR2_Omi_COM
AB01974190	01	Ainno_16251	Ainnocence	AIN1-41_AINNL0041	Lot# MB15NO4141	TC00821291	L020	0.00345	ug/ml	5825	0.47							20220328_SR2_Omi_COM
AB01974190	01	Ainno_16251	Ainnocence	AIN1-41_AINNL0041	Lot# MB15NO4141	TC00821292	L021	0.00109	ug/ml	5675	-0.74							20220328_SR2_Omi_COM
AB01974190	01	Ainno_16251	Ainnocence	AIN1-41_AINNL0041	Lot# MB15NO4141	TC00821291	L021	0.00109	ug/ml	3600	-2.81							20220328_SR2_Omi_COM
AB01974190	01	Ainno_16251	Ainnocence	AIN1-41_AINNL0041	Lot# MB15NO4141	TC00821292	L022	0.000345	ug/ml	8000	2.2							20220328_SR2_Omi_COM
AB01974190	01	Ainno_16251	Ainnocence	AIN1-41_AINNL0041	Lot# MB15NO4141	TC00821291	L022	0.000345	ug/ml	4675	-1.23							20220328_SR2_Omi_COM
AB01974175	01	Ainno_16251	Ainnocence	AIN1-29_AINNL0029	Lot# MB15NO4129	TC00821292	M003	10	ug/ml	5625	-0.8	>10.00	Inactive	0.33	1.94	>9999	20	20220328_SR2_Omi_COM
AB01974175	01	Ainno_16251	Ainnocence	AIN1-29_AINNL0029	Lot# MB15NO4129	TC00821291	M003	10	ug/ml	5700	0.28							20220328_SR2_Omi_COM
AB01974175	01	Ainno_16251	Ainnocence	AIN1-29_AINNL0029	Lot# MB15NO4129	TC00821292	M004	3.16	ug/ml	6500	0.3							20220328_SR2_Omi_COM
AB01974175	01	Ainno_16251	Ainnocence	AIN1-29_AINNL0029	Lot# MB15NO4129	TC00821291	M004	3.16	ug/ml	8625	4.6							20220328_SR2_Omi_COM
AB01974175	01	Ainno_16251	Ainnocence	AIN1-29_AINNL0029	Lot# MB15NO4129	TC00821292	M005	1	ug/ml	6350	0.11							20220328_SR2_Omi_COM
AB01974175	01	Ainno_16251	Ainnocence	AIN1-29_AINNL0029	Lot# MB15NO4129	TC00821291	M005	1	ug/ml	3425	-3.07							20220328_SR2_Omi_COM
AB01974175	01	Ainno_16251	Ainnocence	AIN1-29_AINNL0029	Lot# MB15NO4129	TC00821292	M006	0.316	ug/ml	6750	0.62							20220328_SR2_Omi_COM
AB01974175	01	Ainno_16251	Ainnocence	AIN1-29_AINNL0029	Lot# MB15NO4129	TC00821291	M006	0.316	ug/ml	6425	1.35							20220328_SR2_Omi_COM
AB01974175	01	Ainno_16251	Ainnocence	AIN1-29_AINNL0029	Lot# MB15NO4129	TC00821292	M007	0.1	ug/ml	4950	-1.66							20220328_SR2_Omi_COM
AB01974175	01	Ainno_16251	Ainnocence	AIN1-29_AINNL0029	Lot# MB15NO4129	TC00821291	M007	0.1	ug/ml	4950	-0.82							20220328_SR2_Omi_COM
AB01974175	01	Ainno_16251	Ainnocence	AIN1-29_AINNL0029	Lot# MB15NO4129	TC00821292	M008	0.0316	ug/ml	6925	0.84							20220328_SR2_Omi_COM
AB01974175	01	Ainno_16251	Ainnocence	AIN1-29_AINNL0029	Lot# MB15NO4129	TC00821291	M008	0.0316	ug/ml	8050	3.75							20220328_SR2_Omi_COM
AB01974175	01	Ainno_16251	Ainnocence	AIN1-29_AINNL0029	Lot# MB15NO4129	TC00821292	M009	0.01	ug/ml	6700	0.56							20220328_SR2_Omi_COM
AB01974175	01	Ainno_16251	Ainnocence	AIN1-29_AINNL0029	Lot# MB15NO4129	TC00821291	M009	0.01	ug/ml	4625	-1.3							20220328_SR2_Omi_COM
AB01974175	01	Ainno_16251	Ainnocence	AIN1-29_AINNL0029	Lot# MB15NO4129	TC00821292	M010	0.00316	ug/ml	6725	0.59							20220328_SR2_Omi_COM
AB01974175	01	Ainno_16251	Ainnocence	AIN1-29_AINNL0029	Lot# MB15NO4129	TC00821291	M010	0.00316	ug/ml	5950	0.65							20220328_SR2_Omi_COM
AB01974175	01	Ainno_16251	Ainnocence	AIN1-29_AINNL0029	Lot# MB15NO4129	TC00821292	M011	0.001	ug/ml	5425	-1.06							20220328_SR2_Omi_COM
AB01974175	01	Ainno_16251	Ainnocence	AIN1-29_AINNL0029	Lot# MB15NO4129	TC00821291	M011	0.001	ug/ml	4250	-1.85							20220328_SR2_Omi_COM
AB01974175	01	Ainno_16251	Ainnocence	AIN1-29_AINNL0029	Lot# MB15NO4129	TC00821292	M012	0.000316	ug/ml	3975	-2.9							20220328_SR2_Omi_COM
AB01974175	01	Ainno_16251	Ainnocence	AIN1-29_AINNL0029	Lot# MB15NO4129	TC00821291	M012	0.000316	ug/ml	4675	-1.23							20220328_SR2_Omi_COM
AB01974191	01	Ainno_16251	Ainnocence	AIN1-42_AINNL0042	Lot# MB15NO4142	TC00821292	M013	10.89	ug/ml	24100	22.61	>10.89	Inactive	0.86	3.42	15.06	20	20220328_SR2_Omi_COM
AB01974191	01	Ainno_16251	Ainnocence	AIN1-42_AINNL0042	Lot# MB15NO4142	TC00821291	M013	10.89	ug/ml	23250	26.17							20220328_SR2_Omi_COM
AB01974191	01	Ainno_16251	Ainnocence	AIN1-42_AINNL0042	Lot# MB15NO4142	TC00821292	M014	3.45	ug/ml	10425	5.28							20220328_SR2_Omi_COM
AB01974191	01	Ainno_16251	Ainnocence	AIN1-42_AINNL0042	Lot# MB15NO4142	TC00821291	M014	3.45	ug/ml	15225	14.33							20220328_SR2_Omi_COM
AB01974191	01	Ainno_16251	Ainnocence	AIN1-42_AINNL0042	Lot# MB15NO4142	TC00821292	M015	1.09	ug/ml	8975	3.44							20220328_SR2_Omi_COM
AB01974191	01	Ainno_16251	Ainnocence	AIN1-42_AINNL0042	Lot# MB15NO4142	TC00821291	M015	1.09	ug/ml	8750	4.78							20220328_SR2_Omi_COM
AB01974191	01	Ainno_16251	Ainnocence	AIN1-42_AINNL0042	Lot# MB15NO4142	TC00821292	M016	0.345	ug/ml	7150	1.13							20220328_SR2_Omi_COM
AB01974191	01	Ainno_16251	Ainnocence	AIN1-42_AINNL0042	Lot# MB15NO4142	TC00821291	M016	0.345	ug/ml	7575	3.05							20220328_SR2_Omi_COM
AB01974191	01	Ainno_16251	Ainnocence	AIN1-42_AINNL0042	Lot# MB15NO4142	TC00821292	M017	0.109	ug/ml	6275	0.02							20220328_SR2_Omi_COM
AB01974191	01	Ainno_16251	Ainnocence	AIN1-42_AINNL0042	Lot# MB15NO4142	TC00821291	M017	0.109	ug/ml	7025	2.24							20220328_SR2_Omi_COM
AB01974191	01	Ainno_16251	Ainnocence	AIN1-42_AINNL0042	Lot# MB15NO4142	TC00821292	M018	0.0345	ug/ml	7925	2.11							20220328_SR2_Omi_COM
AB01974191	01	Ainno_16251	Ainnocence	AIN1-42_AINNL0042	Lot# MB15NO4142	TC00821291	M018	0.0345	ug/ml	4325	-1.74							20220328_SR2_Omi_COM
AB01974191	01	Ainno_16251	Ainnocence	AIN1-42_AINNL0042	Lot# MB15NO4142	TC00821292	M019	0.0109	ug/ml	10800	5.75							20220328_SR2_Omi_COM
AB01974191	01	Ainno_16251	Ainnocence	AIN1-42_AINNL0042	Lot# MB15NO4142	TC00821291	M019	0.0109	ug/ml	11525	8.88							20220328_SR2_Omi_COM
AB01974191	01	Ainno_16251	Ainnocence	AIN1-42_AINNL0042	Lot# MB15NO4142	TC00821292	M020	0.00345	ug/ml	9900	4.61							20220328_SR2_Omi_COM
AB01974191	01	Ainno_16251	Ainnocence	AIN1-42_AINNL0042	Lot# MB15NO4142	TC00821291	M020	0.00345	ug/ml	4725	-1.15							20220328_SR2_Omi_COM
AB01974191	01	Ainno_16251	Ainnocence	AIN1-42_AINNL0042	Lot# MB15NO4142	TC00821292	M021	0.00109	ug/ml	4775	-1.88							20220328_SR2_Omi_COM
AB01974191	01	Ainno_16251	Ainnocence	AIN1-42_AINNL0042	Lot# MB15NO4142	TC00821291	M021	0.00109	ug/ml	6650	1.69							20220328_SR2_Omi_COM
AB01974191	01	Ainno_16251	Ainnocence	AIN1-42_AINNL0042	Lot# MB15NO4142	TC00821292	M022	0.000345	ug/ml	7250	1.25							20220328_SR2_Omi_COM
AB01974191	01	Ainno_16251	Ainnocence	AIN1-42_AINNL0042	Lot# MB15NO4142	TC00821291	M022	0.000345	ug/ml	7450	2.87							20220328_SR2_Omi_COM
AB01974176	01	Ainno_16251	Ainnocence	AIN1-30_AINNL0030	Lot# MB15NO4130	TC00821292	N003	8.67	ug/ml	7625	1.73	>8.67	Inactive	-0.6	3.57	0	20	20220328_SR2_Omi_COM
AB01974176	01	Ainno_16251	Ainnocence	AIN1-30_AINNL0030	Lot# MB15NO4130	TC00821291	N003	8.67	ug/ml	6450	1.39							20220328_SR2_Omi_COM
AB01974176	01	Ainno_16251	Ainnocence	AIN1-30_AINNL0030	Lot# MB15NO4130	TC00821292	N004	2.74	ug/ml	5975	-0.36							20220328_SR2_Omi_COM
AB01974176	01	Ainno_16251	Ainnocence	AIN1-30_AINNL0030	Lot# MB15NO4130	TC00821291	N004	2.74	ug/ml	5000	-0.75							20220328_SR2_Omi_COM
AB01974176	01	Ainno_16251	Ainnocence	AIN1-30_AINNL0030	Lot# MB15NO4130	TC00821292	N005	0.867	ug/ml	7600	1.7							20220328_SR2_Omi_COM
AB01974176	01	Ainno_16251	Ainnocence	AIN1-30_AINNL0030	Lot# MB15NO4130	TC00821291	N005	0.867	ug/ml	5575	0.1							20220328_SR2_Omi_COM
AB01974176	01	Ainno_16251	Ainnocence	AIN1-30_AINNL0030	Lot# MB15NO4130	TC00821292	N006	0.274	ug/ml	11575	6.73							20220328_SR2_Omi_COM
AB01974176	01	Ainno_16251	Ainnocence	AIN1-30_AINNL0030	Lot# MB15NO4130	TC00821291	N006	0.274	ug/ml	3750	-2.59							20220328_SR2_Omi_COM
AB01974176	01	Ainno_16251	Ainnocence	AIN1-30_AINNL0030	Lot# MB15NO4130	TC00821292	N007	0.0867	ug/ml	5875	-0.49							20220328_SR2_Omi_COM
AB01974176	01	Ainno_16251	Ainnocence	AIN1-30_AINNL0030	Lot# MB15NO4130	TC00821291	N007	0.0867	ug/ml	5300	-0.31							20220328_SR2_Omi_COM
AB01974176	01	Ainno_16251	Ainnocence	AIN1-30_AINNL0030	Lot# MB15NO4130	TC00821292	N008	0.0274	ug/ml	5175	-1.38							20220328_SR2_Omi_COM
AB01974176	01	Ainno_16251	Ainnocence	AIN1-30_AINNL0030	Lot# MB15NO4130	TC00821291	N008	0.0274	ug/ml	4600	-1.34							20220328_SR2_Omi_COM
AB01974176	01	Ainno_16251	Ainnocence	AIN1-30_AINNL0030	Lot# MB15NO4130	TC00821292	N009	0.00867	ug/ml	10425	5.28							20220328_SR2_Omi_COM
AB01974176	01	Ainno_16251	Ainnocence	AIN1-30_AINNL0030	Lot# MB15NO4130	TC00821291	N009	0.00867	ug/ml	5950	0.65							20220328_SR2_Omi_COM
AB01974176	01	Ainno_16251	Ainnocence	AIN1-30_AINNL0030	Lot# MB15NO4130	TC00821292	N010	0.00274	ug/ml	6075	-0.23							20220328_SR2_Omi_COM
AB01974176	01	Ainno_16251	Ainnocence	AIN1-30_AINNL0030	Lot# MB15NO4130	TC00821291	N010	0.00274	ug/ml	5850	0.51							20220328_SR2_Omi_COM
AB01974176	01	Ainno_16251	Ainnocence	AIN1-30_AINNL0030	Lot# MB15NO4130	TC00821292	N011	0.000867	ug/ml	15175	11.3							20220328_SR2_Omi_COM
AB01974176	01	Ainno_16251	Ainnocence	AIN1-30_AINNL0030	Lot# MB15NO4130	TC00821291	N011	0.000867	ug/ml	5250	-0.38							20220328_SR2_Omi_COM
AB01974176	01	Ainno_16251	Ainnocence	AIN1-30_AINNL0030	Lot# MB15NO4130	TC00821292	N012	0.000274	ug/ml	5925	-0.42							20220328_SR2_Omi_COM
AB01974176	01	Ainno_16251	Ainnocence	AIN1-30_AINNL0030	Lot# MB15NO4130	TC00821291	N012	0.000274	ug/ml	3575	-2.85							20220328_SR2_Omi_COM
AB01974192	01	Ainno_16251	Ainnocence	AIN1-11_AINNL0011	Lot# MB15NO4111	TC00821292	N013	5.44	ug/ml	5100	-1.47	>5.44	Inactive	1	3.45	>9999	20	20220328_SR2_Omi_COM
AB01974192	01	Ainno_16251	Ainnocence	AIN1-11_AINNL0011	Lot# MB15NO4111	TC00821291	N013	5.44	ug/ml	5050	-0.67							20220328_SR2_Omi_COM
AB01974192	01	Ainno_16251	Ainnocence	AIN1-11_AINNL0011	Lot# MB15NO4111	TC00821292	N014	1.72	ug/ml	8900	3.35							20220328_SR2_Omi_COM
AB01974192	01	Ainno_16251	Ainnocence	AIN1-11_AINNL0011	Lot# MB15NO4111	TC00821291	N014	1.72	ug/ml	6100	0.87							20220328_SR2_Omi_COM
AB01974192	01	Ainno_16251	Ainnocence	AIN1-11_AINNL0011	Lot# MB15NO4111	TC00821292	N015	0.544	ug/ml	10475	5.34							20220328_SR2_Omi_COM
AB01974192	01	Ainno_16251	Ainnocence	AIN1-11_AINNL0011	Lot# MB15NO4111	TC00821291	N015	0.544	ug/ml	4050	-2.15							20220328_SR2_Omi_COM
AB01974192	01	Ainno_16251	Ainnocence	AIN1-11_AINNL0011	Lot# MB15NO4111	TC00821292	N016	0.172	ug/ml	4000	-2.86							20220328_SR2_Omi_COM
AB01974192	01	Ainno_16251	Ainnocence	AIN1-11_AINNL0011	Lot# MB15NO4111	TC00821291	N016	0.172	ug/ml	9550	5.96							20220328_SR2_Omi_COM
AB01974192	01	Ainno_16251	Ainnocence	AIN1-11_AINNL0011	Lot# MB15NO4111	TC00821292	N017	0.0544	ug/ml	5950	-0.39							20220328_SR2_Omi_COM
AB01974192	01	Ainno_16251	Ainnocence	AIN1-11_AINNL0011	Lot# MB15NO4111	TC00821291	N017	0.0544	ug/ml	7775	3.35							20220328_SR2_Omi_COM
AB01974192	01	Ainno_16251	Ainnocence	AIN1-11_AINNL0011	Lot# MB15NO4111	TC00821292	N018	0.0172	ug/ml	6100	-0.2							20220328_SR2_Omi_COM
AB01974192	01	Ainno_16251	Ainnocence	AIN1-11_AINNL0011	Lot# MB15NO4111	TC00821291	N018	0.0172	ug/ml	6850	1.98							20220328_SR2_Omi_COM
AB01974192	01	Ainno_16251	Ainnocence	AIN1-11_AINNL0011	Lot# MB15NO4111	TC00821292	N019	0.00544	ug/ml	5625	-0.8							20220328_SR2_Omi_COM
AB01974192	01	Ainno_16251	Ainnocence	AIN1-11_AINNL0011	Lot# MB15NO4111	TC00821291	N019	0.00544	ug/ml	5025	-0.71							20220328_SR2_Omi_COM
AB01974192	01	Ainno_16251	Ainnocence	AIN1-11_AINNL0011	Lot# MB15NO4111	TC00821292	N020	0.00172	ug/ml	14200	10.06							20220328_SR2_Omi_COM
AB01974192	01	Ainno_16251	Ainnocence	AIN1-11_AINNL0011	Lot# MB15NO4111	TC00821291	N020	0.00172	ug/ml	5050	-0.67							20220328_SR2_Omi_COM
AB01974192	01	Ainno_16251	Ainnocence	AIN1-11_AINNL0011	Lot# MB15NO4111	TC00821292	N021	0.000544	ug/ml	6100	-0.2							20220328_SR2_Omi_COM
AB01974192	01	Ainno_16251	Ainnocence	AIN1-11_AINNL0011	Lot# MB15NO4111	TC00821291	N021	0.000544	ug/ml	5600	0.14							20220328_SR2_Omi_COM
AB01974192	01	Ainno_16251	Ainnocence	AIN1-11_AINNL0011	Lot# MB15NO4111	TC00821292	N022	0.000172	ug/ml	5125	-1.44							20220328_SR2_Omi_COM
AB01974192	01	Ainno_16251	Ainnocence	AIN1-11_AINNL0011	Lot# MB15NO4111	TC00821291	N022	0.000172	ug/ml	4375	-1.67							20220328_SR2_Omi_COM
AB01974177	01	Ainno_16251	Ainnocence	AIN1-31_AINNL0031	Lot# MB15NO4131	TC00821292	O003	9.78	ug/ml	64975	74.4	5.473	Active	2.06	4.44	0.33	20	20220328_SR2_Omi_COM
AB01974177	01	Ainno_16251	Ainnocence	AIN1-31_AINNL0031	Lot# MB15NO4131	TC00821291	O003	9.78	ug/ml	60125	80.56							20220328_SR2_Omi_COM
AB01974177	01	Ainno_16251	Ainnocence	AIN1-31_AINNL0031	Lot# MB15NO4131	TC00821292	O004	3.09	ug/ml	31300	31.73							20220328_SR2_Omi_COM
AB01974177	01	Ainno_16251	Ainnocence	AIN1-31_AINNL0031	Lot# MB15NO4131	TC00821291	O004	3.09	ug/ml	14075	12.64							20220328_SR2_Omi_COM
AB01974177	01	Ainno_16251	Ainnocence	AIN1-31_AINNL0031	Lot# MB15NO4131	TC00821292	O005	0.978	ug/ml	11700	6.89							20220328_SR2_Omi_COM
AB01974177	01	Ainno_16251	Ainnocence	AIN1-31_AINNL0031	Lot# MB15NO4131	TC00821291	O005	0.978	ug/ml	10450	7.29							20220328_SR2_Omi_COM
AB01974177	01	Ainno_16251	Ainnocence	AIN1-31_AINNL0031	Lot# MB15NO4131	TC00821292	O006	0.309	ug/ml	5025	-1.57							20220328_SR2_Omi_COM
AB01974177	01	Ainno_16251	Ainnocence	AIN1-31_AINNL0031	Lot# MB15NO4131	TC00821291	O006	0.309	ug/ml	9050	5.23							20220328_SR2_Omi_COM
AB01974177	01	Ainno_16251	Ainnocence	AIN1-31_AINNL0031	Lot# MB15NO4131	TC00821292	O007	0.0978	ug/ml	7250	1.25							20220328_SR2_Omi_COM
AB01974177	01	Ainno_16251	Ainnocence	AIN1-31_AINNL0031	Lot# MB15NO4131	TC00821291	O007	0.0978	ug/ml	4725	-1.15							20220328_SR2_Omi_COM
AB01974177	01	Ainno_16251	Ainnocence	AIN1-31_AINNL0031	Lot# MB15NO4131	TC00821292	O008	0.0309	ug/ml	11625	6.8							20220328_SR2_Omi_COM
AB01974177	01	Ainno_16251	Ainnocence	AIN1-31_AINNL0031	Lot# MB15NO4131	TC00821291	O008	0.0309	ug/ml	6875	2.02							20220328_SR2_Omi_COM
AB01974177	01	Ainno_16251	Ainnocence	AIN1-31_AINNL0031	Lot# MB15NO4131	TC00821292	O009	0.00978	ug/ml	7175	1.16							20220328_SR2_Omi_COM
AB01974177	01	Ainno_16251	Ainnocence	AIN1-31_AINNL0031	Lot# MB15NO4131	TC00821291	O009	0.00978	ug/ml	4350	-1.71							20220328_SR2_Omi_COM
AB01974177	01	Ainno_16251	Ainnocence	AIN1-31_AINNL0031	Lot# MB15NO4131	TC00821292	O010	0.00309	ug/ml	8050	2.27							20220328_SR2_Omi_COM
AB01974177	01	Ainno_16251	Ainnocence	AIN1-31_AINNL0031	Lot# MB15NO4131	TC00821291	O010	0.00309	ug/ml	6625	1.65							20220328_SR2_Omi_COM
AB01974177	01	Ainno_16251	Ainnocence	AIN1-31_AINNL0031	Lot# MB15NO4131	TC00821292	O011	0.000978	ug/ml	4925	-1.69							20220328_SR2_Omi_COM
AB01974177	01	Ainno_16251	Ainnocence	AIN1-31_AINNL0031	Lot# MB15NO4131	TC00821291	O011	0.000978	ug/ml	3225	-3.37							20220328_SR2_Omi_COM
AB01974177	01	Ainno_16251	Ainnocence	AIN1-31_AINNL0031	Lot# MB15NO4131	TC00821292	O012	0.000309	ug/ml	6175	-0.11							20220328_SR2_Omi_COM
AB01974177	01	Ainno_16251	Ainnocence	AIN1-31_AINNL0031	Lot# MB15NO4131	TC00821291	O012	0.000309	ug/ml	6850	1.98							20220328_SR2_Omi_COM
AB01974193	01	Ainno_16251	Ainnocence	AIN1-14_AINNL0014	Lot# MB15NO4114	TC00821292	O013	11.89	ug/ml	6850	0.75	>11.89	Inactive	-1	2.66	0	20	20220328_SR2_Omi_COM
AB01974193	01	Ainno_16251	Ainnocence	AIN1-14_AINNL0014	Lot# MB15NO4114	TC00821291	O013	11.89	ug/ml	4300	-1.78							20220328_SR2_Omi_COM
AB01974193	01	Ainno_16251	Ainnocence	AIN1-14_AINNL0014	Lot# MB15NO4114	TC00821292	O014	3.76	ug/ml	7625	1.73							20220328_SR2_Omi_COM
AB01974193	01	Ainno_16251	Ainnocence	AIN1-14_AINNL0014	Lot# MB15NO4114	TC00821291	O014	3.76	ug/ml	3075	-3.59							20220328_SR2_Omi_COM
AB01974193	01	Ainno_16251	Ainnocence	AIN1-14_AINNL0014	Lot# MB15NO4114	TC00821292	O015	1.19	ug/ml	4950	-1.66							20220328_SR2_Omi_COM
AB01974193	01	Ainno_16251	Ainnocence	AIN1-14_AINNL0014	Lot# MB15NO4114	TC00821291	O015	1.19	ug/ml	11075	8.21							20220328_SR2_Omi_COM
AB01974193	01	Ainno_16251	Ainnocence	AIN1-14_AINNL0014	Lot# MB15NO4114	TC00821292	O016	0.377	ug/ml	7075	1.03							20220328_SR2_Omi_COM
AB01974193	01	Ainno_16251	Ainnocence	AIN1-14_AINNL0014	Lot# MB15NO4114	TC00821291	O016	0.377	ug/ml	5300	-0.31							20220328_SR2_Omi_COM
AB01974193	01	Ainno_16251	Ainnocence	AIN1-14_AINNL0014	Lot# MB15NO4114	TC00821292	O017	0.119	ug/ml	5900	-0.46							20220328_SR2_Omi_COM
AB01974193	01	Ainno_16251	Ainnocence	AIN1-14_AINNL0014	Lot# MB15NO4114	TC00821291	O017	0.119	ug/ml	4600	-1.34							20220328_SR2_Omi_COM
AB01974193	01	Ainno_16251	Ainnocence	AIN1-14_AINNL0014	Lot# MB15NO4114	TC00821292	O018	0.0377	ug/ml	6950	0.87							20220328_SR2_Omi_COM
AB01974193	01	Ainno_16251	Ainnocence	AIN1-14_AINNL0014	Lot# MB15NO4114	TC00821291	O018	0.0377	ug/ml	4800	-1.04							20220328_SR2_Omi_COM
AB01974193	01	Ainno_16251	Ainnocence	AIN1-14_AINNL0014	Lot# MB15NO4114	TC00821292	O019	0.0119	ug/ml	6475	0.27							20220328_SR2_Omi_COM
AB01974193	01	Ainno_16251	Ainnocence	AIN1-14_AINNL0014	Lot# MB15NO4114	TC00821291	O019	0.0119	ug/ml	3375	-3.14							20220328_SR2_Omi_COM
AB01974193	01	Ainno_16251	Ainnocence	AIN1-14_AINNL0014	Lot# MB15NO4114	TC00821292	O020	0.00377	ug/ml	9800	4.49							20220328_SR2_Omi_COM
AB01974193	01	Ainno_16251	Ainnocence	AIN1-14_AINNL0014	Lot# MB15NO4114	TC00821291	O020	0.00377	ug/ml	6225	1.06							20220328_SR2_Omi_COM
AB01974193	01	Ainno_16251	Ainnocence	AIN1-14_AINNL0014	Lot# MB15NO4114	TC00821292	O021	0.00119	ug/ml	5325	-1.19							20220328_SR2_Omi_COM
AB01974193	01	Ainno_16251	Ainnocence	AIN1-14_AINNL0014	Lot# MB15NO4114	TC00821291	O021	0.00119	ug/ml	5825	0.47							20220328_SR2_Omi_COM
AB01974193	01	Ainno_16251	Ainnocence	AIN1-14_AINNL0014	Lot# MB15NO4114	TC00821292	O022	0.000377	ug/ml	6450	0.24							20220328_SR2_Omi_COM
AB01974193	01	Ainno_16251	Ainnocence	AIN1-14_AINNL0014	Lot# MB15NO4114	TC00821291	O022	0.000377	ug/ml	5500	-0.01							20220328_SR2_Omi_COM
AB01974178	01	Ainno_16251	Ainnocence	AIN1-32_AINNL0032	Lot# MB15NO4132	TC00821292	P003	10.22	ug/ml	11150	6.2	>10.22	Inactive	0.4	3.05	>9999	20	20220328_SR2_Omi_COM
AB01974178	01	Ainno_16251	Ainnocence	AIN1-32_AINNL0032	Lot# MB15NO4132	TC00821291	P003	10.22	ug/ml	4425	-1.6							20220328_SR2_Omi_COM
AB01974178	01	Ainno_16251	Ainnocence	AIN1-32_AINNL0032	Lot# MB15NO4132	TC00821292	P004	3.23	ug/ml	6225	-0.04							20220328_SR2_Omi_COM
AB01974178	01	Ainno_16251	Ainnocence	AIN1-32_AINNL0032	Lot# MB15NO4132	TC00821291	P004	3.23	ug/ml	5525	0.03							20220328_SR2_Omi_COM
AB01974178	01	Ainno_16251	Ainnocence	AIN1-32_AINNL0032	Lot# MB15NO4132	TC00821292	P005	1.02	ug/ml	7975	2.17							20220328_SR2_Omi_COM
AB01974178	01	Ainno_16251	Ainnocence	AIN1-32_AINNL0032	Lot# MB15NO4132	TC00821291	P005	1.02	ug/ml	13025	11.09							20220328_SR2_Omi_COM
AB01974178	01	Ainno_16251	Ainnocence	AIN1-32_AINNL0032	Lot# MB15NO4132	TC00821292	P006	0.323	ug/ml	6100	-0.2							20220328_SR2_Omi_COM
AB01974178	01	Ainno_16251	Ainnocence	AIN1-32_AINNL0032	Lot# MB15NO4132	TC00821291	P006	0.323	ug/ml	5075	-0.64							20220328_SR2_Omi_COM
AB01974178	01	Ainno_16251	Ainnocence	AIN1-32_AINNL0032	Lot# MB15NO4132	TC00821292	P007	0.102	ug/ml	6575	0.4							20220328_SR2_Omi_COM
AB01974178	01	Ainno_16251	Ainnocence	AIN1-32_AINNL0032	Lot# MB15NO4132	TC00821291	P007	0.102	ug/ml	4800	-1.04							20220328_SR2_Omi_COM
AB01974178	01	Ainno_16251	Ainnocence	AIN1-32_AINNL0032	Lot# MB15NO4132	TC00821292	P008	0.0323	ug/ml	4625	-2.07							20220328_SR2_Omi_COM
AB01974178	01	Ainno_16251	Ainnocence	AIN1-32_AINNL0032	Lot# MB15NO4132	TC00821291	P008	0.0323	ug/ml	4400	-1.63							20220328_SR2_Omi_COM
AB01974178	01	Ainno_16251	Ainnocence	AIN1-32_AINNL0032	Lot# MB15NO4132	TC00821292	P009	0.0102	ug/ml	6325	0.08							20220328_SR2_Omi_COM
AB01974178	01	Ainno_16251	Ainnocence	AIN1-32_AINNL0032	Lot# MB15NO4132	TC00821291	P009	0.0102	ug/ml	4925	-0.86							20220328_SR2_Omi_COM
AB01974178	01	Ainno_16251	Ainnocence	AIN1-32_AINNL0032	Lot# MB15NO4132	TC00821292	P010	0.00323	ug/ml	6525	0.34							20220328_SR2_Omi_COM
AB01974178	01	Ainno_16251	Ainnocence	AIN1-32_AINNL0032	Lot# MB15NO4132	TC00821291	P010	0.00323	ug/ml	3825	-2.48							20220328_SR2_Omi_COM
AB01974178	01	Ainno_16251	Ainnocence	AIN1-32_AINNL0032	Lot# MB15NO4132	TC00821292	P011	0.00102	ug/ml	5850	-0.52							20220328_SR2_Omi_COM
AB01974178	01	Ainno_16251	Ainnocence	AIN1-32_AINNL0032	Lot# MB15NO4132	TC00821291	P011	0.00102	ug/ml	5050	-0.67							20220328_SR2_Omi_COM
AB01974178	01	Ainno_16251	Ainnocence	AIN1-32_AINNL0032	Lot# MB15NO4132	TC00821292	P012	0.000323	ug/ml	5175	-1.38							20220328_SR2_Omi_COM
AB01974178	01	Ainno_16251	Ainnocence	AIN1-32_AINNL0032	Lot# MB15NO4132	TC00821291	P012	0.000323	ug/ml	4025	-2.19							20220328_SR2_Omi_COM
AB01974194	01	Ainno_16251	Ainnocence	AIN1-17_AINNL0017	Lot# MB15NO4117	TC00821292	P013	11.78	ug/ml	5450	-1.03	>11.78	Inactive	-1	2.66	0	20	20220328_SR2_Omi_COM
AB01974194	01	Ainno_16251	Ainnocence	AIN1-17_AINNL0017	Lot# MB15NO4117	TC00821291	P013	11.78	ug/ml	4750	-1.12							20220328_SR2_Omi_COM
AB01974194	01	Ainno_16251	Ainnocence	AIN1-17_AINNL0017	Lot# MB15NO4117	TC00821292	P014	3.73	ug/ml	4925	-1.69							20220328_SR2_Omi_COM
AB01974194	01	Ainno_16251	Ainnocence	AIN1-17_AINNL0017	Lot# MB15NO4117	TC00821291	P014	3.73	ug/ml	4850	-0.97							20220328_SR2_Omi_COM
AB01974194	01	Ainno_16251	Ainnocence	AIN1-17_AINNL0017	Lot# MB15NO4117	TC00821292	P015	1.18	ug/ml	7175	1.16							20220328_SR2_Omi_COM
AB01974194	01	Ainno_16251	Ainnocence	AIN1-17_AINNL0017	Lot# MB15NO4117	TC00821291	P015	1.18	ug/ml	4100	-2.08							20220328_SR2_Omi_COM
AB01974194	01	Ainno_16251	Ainnocence	AIN1-17_AINNL0017	Lot# MB15NO4117	TC00821292	P016	0.373	ug/ml	5500	-0.96							20220328_SR2_Omi_COM
AB01974194	01	Ainno_16251	Ainnocence	AIN1-17_AINNL0017	Lot# MB15NO4117	TC00821291	P016	0.373	ug/ml	10850	7.88							20220328_SR2_Omi_COM
AB01974194	01	Ainno_16251	Ainnocence	AIN1-17_AINNL0017	Lot# MB15NO4117	TC00821292	P017	0.118	ug/ml	5775	-0.61							20220328_SR2_Omi_COM
AB01974194	01	Ainno_16251	Ainnocence	AIN1-17_AINNL0017	Lot# MB15NO4117	TC00821291	P017	0.118	ug/ml	4800	-1.04							20220328_SR2_Omi_COM
AB01974194	01	Ainno_16251	Ainnocence	AIN1-17_AINNL0017	Lot# MB15NO4117	TC00821292	P018	0.0373	ug/ml	4000	-2.86							20220328_SR2_Omi_COM
AB01974194	01	Ainno_16251	Ainnocence	AIN1-17_AINNL0017	Lot# MB15NO4117	TC00821291	P018	0.0373	ug/ml	5400	-0.16							20220328_SR2_Omi_COM
AB01974194	01	Ainno_16251	Ainnocence	AIN1-17_AINNL0017	Lot# MB15NO4117	TC00821292	P019	0.0118	ug/ml	4300	-2.48							20220328_SR2_Omi_COM
AB01974194	01	Ainno_16251	Ainnocence	AIN1-17_AINNL0017	Lot# MB15NO4117	TC00821291	P019	0.0118	ug/ml	5475	-0.05							20220328_SR2_Omi_COM
AB01974194	01	Ainno_16251	Ainnocence	AIN1-17_AINNL0017	Lot# MB15NO4117	TC00821292	P020	0.00373	ug/ml	4450	-2.29							20220328_SR2_Omi_COM
AB01974194	01	Ainno_16251	Ainnocence	AIN1-17_AINNL0017	Lot# MB15NO4117	TC00821291	P020	0.00373	ug/ml	7275	2.61							20220328_SR2_Omi_COM
AB01974194	01	Ainno_16251	Ainnocence	AIN1-17_AINNL0017	Lot# MB15NO4117	TC00821292	P021	0.00118	ug/ml	4250	-2.55							20220328_SR2_Omi_COM
AB01974194	01	Ainno_16251	Ainnocence	AIN1-17_AINNL0017	Lot# MB15NO4117	TC00821291	P021	0.00118	ug/ml	8350	4.19							20220328_SR2_Omi_COM
AB01974194	01	Ainno_16251	Ainnocence	AIN1-17_AINNL0017	Lot# MB15NO4117	TC00821292	P022	0.000373	ug/ml	6125	-0.17							20220328_SR2_Omi_COM
AB01974194	01	Ainno_16251	Ainnocence	AIN1-17_AINNL0017	Lot# MB15NO4117	TC00821291	P022	0.000373	ug/ml	4975	-0.78							20220328_SR2_Omi_COM
AB01974195	01	Ainno_16251	Ainnocence	AIN1-12_AINNL0012	Lot# MB15NO2405	TC00821295	A003	41.22	ug/ml	3050	-5.36	>41.22	Inactive	-0.31	2.92	0	20	20220328_SR2_Omi_COM
AB01974195	01	Ainno_16251	Ainnocence	AIN1-12_AINNL0012	Lot# MB15NO2405	TC00821294	A003	41.22	ug/ml	6625	2.12							20220328_SR2_Omi_COM
AB01974195	01	Ainno_16251	Ainnocence	AIN1-12_AINNL0012	Lot# MB15NO2405	TC00821295	A004	13	ug/ml	6025	-1.6							20220328_SR2_Omi_COM
AB01974195	01	Ainno_16251	Ainnocence	AIN1-12_AINNL0012	Lot# MB15NO2405	TC00821294	A004	13	ug/ml	5525	0.78							20220328_SR2_Omi_COM
AB01974195	01	Ainno_16251	Ainnocence	AIN1-12_AINNL0012	Lot# MB15NO2405	TC00821295	A005	4.11	ug/ml	5975	-1.67							20220328_SR2_Omi_COM
AB01974195	01	Ainno_16251	Ainnocence	AIN1-12_AINNL0012	Lot# MB15NO2405	TC00821294	A005	4.11	ug/ml	7800	3.55							20220328_SR2_Omi_COM
AB01974195	01	Ainno_16251	Ainnocence	AIN1-12_AINNL0012	Lot# MB15NO2405	TC00821295	A006	1.3	ug/ml	9950	3.35							20220328_SR2_Omi_COM
AB01974195	01	Ainno_16251	Ainnocence	AIN1-12_AINNL0012	Lot# MB15NO2405	TC00821294	A006	1.3	ug/ml	3700	-1.44							20220328_SR2_Omi_COM
AB01974195	01	Ainno_16251	Ainnocence	AIN1-12_AINNL0012	Lot# MB15NO2405	TC00821295	A007	0.411	ug/ml	6150	-1.44							20220328_SR2_Omi_COM
AB01974195	01	Ainno_16251	Ainnocence	AIN1-12_AINNL0012	Lot# MB15NO2405	TC00821294	A007	0.411	ug/ml	3275	-1.95							20220328_SR2_Omi_COM
AB01974195	01	Ainno_16251	Ainnocence	AIN1-12_AINNL0012	Lot# MB15NO2405	TC00821295	A008	0.13	ug/ml	6275	-1.29							20220328_SR2_Omi_COM
AB01974195	01	Ainno_16251	Ainnocence	AIN1-12_AINNL0012	Lot# MB15NO2405	TC00821294	A008	0.13	ug/ml	7450	3.13							20220328_SR2_Omi_COM
AB01974195	01	Ainno_16251	Ainnocence	AIN1-12_AINNL0012	Lot# MB15NO2405	TC00821295	A009	0.0411	ug/ml	7275	-0.02							20220328_SR2_Omi_COM
AB01974195	01	Ainno_16251	Ainnocence	AIN1-12_AINNL0012	Lot# MB15NO2405	TC00821294	A009	0.0411	ug/ml	5400	0.63							20220328_SR2_Omi_COM
AB01974195	01	Ainno_16251	Ainnocence	AIN1-12_AINNL0012	Lot# MB15NO2405	TC00821295	A010	0.013	ug/ml	11925	5.85							20220328_SR2_Omi_COM
AB01974195	01	Ainno_16251	Ainnocence	AIN1-12_AINNL0012	Lot# MB15NO2405	TC00821294	A010	0.013	ug/ml	4525	-0.43							20220328_SR2_Omi_COM
AB01974195	01	Ainno_16251	Ainnocence	AIN1-12_AINNL0012	Lot# MB15NO2405	TC00821295	A011	0.00411	ug/ml	7075	-0.28							20220328_SR2_Omi_COM
AB01974195	01	Ainno_16251	Ainnocence	AIN1-12_AINNL0012	Lot# MB15NO2405	TC00821294	A011	0.00411	ug/ml	8025	3.83							20220328_SR2_Omi_COM
AB01974195	01	Ainno_16251	Ainnocence	AIN1-12_AINNL0012	Lot# MB15NO2405	TC00821295	A012	0.0013	ug/ml	4250	-3.84							20220328_SR2_Omi_COM
AB01974195	01	Ainno_16251	Ainnocence	AIN1-12_AINNL0012	Lot# MB15NO2405	TC00821294	A012	0.0013	ug/ml	8000	3.8							20220328_SR2_Omi_COM
AB01974211	01	Ainno_16251	Ainnocence	AIN1-49_AINNL0049	Lot# MB15NO4149	TC00821295	A013	11.22	ug/ml	5800	-1.89	>11.22	Inactive	-0.15	4.34	0	20	20220328_SR2_Omi_COM
AB01974211	01	Ainno_16251	Ainnocence	AIN1-49_AINNL0049	Lot# MB15NO4149	TC00821294	A013	11.22	ug/ml	6100	1.48							20220328_SR2_Omi_COM
AB01974211	01	Ainno_16251	Ainnocence	AIN1-49_AINNL0049	Lot# MB15NO4149	TC00821295	A014	3.55	ug/ml	12325	6.35							20220328_SR2_Omi_COM
AB01974211	01	Ainno_16251	Ainnocence	AIN1-49_AINNL0049	Lot# MB15NO4149	TC00821294	A014	3.55	ug/ml	7200	2.82							20220328_SR2_Omi_COM
AB01974211	01	Ainno_16251	Ainnocence	AIN1-49_AINNL0049	Lot# MB15NO4149	TC00821295	A015	1.12	ug/ml	13575	7.93							20220328_SR2_Omi_COM
AB01974211	01	Ainno_16251	Ainnocence	AIN1-49_AINNL0049	Lot# MB15NO4149	TC00821294	A015	1.12	ug/ml	3350	-1.86							20220328_SR2_Omi_COM
AB01974211	01	Ainno_16251	Ainnocence	AIN1-49_AINNL0049	Lot# MB15NO4149	TC00821295	A016	0.354	ug/ml	3975	-4.19							20220328_SR2_Omi_COM
AB01974211	01	Ainno_16251	Ainnocence	AIN1-49_AINNL0049	Lot# MB15NO4149	TC00821294	A016	0.354	ug/ml	8275	4.13							20220328_SR2_Omi_COM
AB01974211	01	Ainno_16251	Ainnocence	AIN1-49_AINNL0049	Lot# MB15NO4149	TC00821295	A017	0.112	ug/ml	5000	-2.9							20220328_SR2_Omi_COM
AB01974211	01	Ainno_16251	Ainnocence	AIN1-49_AINNL0049	Lot# MB15NO4149	TC00821294	A017	0.112	ug/ml	3550	-1.62							20220328_SR2_Omi_COM
AB01974211	01	Ainno_16251	Ainnocence	AIN1-49_AINNL0049	Lot# MB15NO4149	TC00821295	A018	0.0354	ug/ml	7725	0.54							20220328_SR2_Omi_COM
AB01974211	01	Ainno_16251	Ainnocence	AIN1-49_AINNL0049	Lot# MB15NO4149	TC00821294	A018	0.0354	ug/ml	8150	3.98							20220328_SR2_Omi_COM
AB01974211	01	Ainno_16251	Ainnocence	AIN1-49_AINNL0049	Lot# MB15NO4149	TC00821295	A019	0.0112	ug/ml	8050	0.95							20220328_SR2_Omi_COM
AB01974211	01	Ainno_16251	Ainnocence	AIN1-49_AINNL0049	Lot# MB15NO4149	TC00821294	A019	0.0112	ug/ml	4250	-0.77							20220328_SR2_Omi_COM
AB01974211	01	Ainno_16251	Ainnocence	AIN1-49_AINNL0049	Lot# MB15NO4149	TC00821295	A020	0.00354	ug/ml	17650	13.07							20220328_SR2_Omi_COM
AB01974211	01	Ainno_16251	Ainnocence	AIN1-49_AINNL0049	Lot# MB15NO4149	TC00821294	A020	0.00354	ug/ml	4175	-0.86							20220328_SR2_Omi_COM
AB01974211	01	Ainno_16251	Ainnocence	AIN1-49_AINNL0049	Lot# MB15NO4149	TC00821295	A021	0.00112	ug/ml	5125	-2.74							20220328_SR2_Omi_COM
AB01974211	01	Ainno_16251	Ainnocence	AIN1-49_AINNL0049	Lot# MB15NO4149	TC00821294	A021	0.00112	ug/ml	7525	3.22							20220328_SR2_Omi_COM
AB01974211	01	Ainno_16251	Ainnocence	AIN1-49_AINNL0049	Lot# MB15NO4149	TC00821295	A022	0.000354	ug/ml	9700	3.04							20220328_SR2_Omi_COM
AB01974211	01	Ainno_16251	Ainnocence	AIN1-49_AINNL0049	Lot# MB15NO4149	TC00821294	A022	0.000354	ug/ml	9450	5.56							20220328_SR2_Omi_COM
AB01974196	01	Ainno_16251	Ainnocence	AIN1-20_AINNL0020	Lot# MB15NO2406	TC00821295	B003	45.22	ug/ml	3725	-4.51	>45.22	Inactive	-2.15	3.14	1.13	20	20220328_SR2_Omi_COM
AB01974196	01	Ainno_16251	Ainnocence	AIN1-20_AINNL0020	Lot# MB15NO2406	TC00821294	B003	45.22	ug/ml	5375	0.6							20220328_SR2_Omi_COM
AB01974196	01	Ainno_16251	Ainnocence	AIN1-20_AINNL0020	Lot# MB15NO2406	TC00821295	B004	14.3	ug/ml	4200	-3.91							20220328_SR2_Omi_COM
AB01974196	01	Ainno_16251	Ainnocence	AIN1-20_AINNL0020	Lot# MB15NO2406	TC00821294	B004	14.3	ug/ml	3750	-1.38							20220328_SR2_Omi_COM
AB01974196	01	Ainno_16251	Ainnocence	AIN1-20_AINNL0020	Lot# MB15NO2406	TC00821295	B005	4.53	ug/ml	11175	4.9							20220328_SR2_Omi_COM
AB01974196	01	Ainno_16251	Ainnocence	AIN1-20_AINNL0020	Lot# MB15NO2406	TC00821294	B005	4.53	ug/ml	10000	6.23							20220328_SR2_Omi_COM
AB01974196	01	Ainno_16251	Ainnocence	AIN1-20_AINNL0020	Lot# MB15NO2406	TC00821295	B006	1.43	ug/ml	5800	-1.89							20220328_SR2_Omi_COM
AB01974196	01	Ainno_16251	Ainnocence	AIN1-20_AINNL0020	Lot# MB15NO2406	TC00821294	B006	1.43	ug/ml	6825	2.37							20220328_SR2_Omi_COM
AB01974196	01	Ainno_16251	Ainnocence	AIN1-20_AINNL0020	Lot# MB15NO2406	TC00821295	B007	0.453	ug/ml	9200	2.41							20220328_SR2_Omi_COM
AB01974196	01	Ainno_16251	Ainnocence	AIN1-20_AINNL0020	Lot# MB15NO2406	TC00821294	B007	0.453	ug/ml	6500	1.97							20220328_SR2_Omi_COM
AB01974196	01	Ainno_16251	Ainnocence	AIN1-20_AINNL0020	Lot# MB15NO2406	TC00821295	B008	0.143	ug/ml	5350	-2.45							20220328_SR2_Omi_COM
AB01974196	01	Ainno_16251	Ainnocence	AIN1-20_AINNL0020	Lot# MB15NO2406	TC00821294	B008	0.143	ug/ml	5900	1.24							20220328_SR2_Omi_COM
AB01974196	01	Ainno_16251	Ainnocence	AIN1-20_AINNL0020	Lot# MB15NO2406	TC00821295	B009	0.0453	ug/ml	11325	5.09							20220328_SR2_Omi_COM
AB01974196	01	Ainno_16251	Ainnocence	AIN1-20_AINNL0020	Lot# MB15NO2406	TC00821294	B009	0.0453	ug/ml	5200	0.39							20220328_SR2_Omi_COM
AB01974196	01	Ainno_16251	Ainnocence	AIN1-20_AINNL0020	Lot# MB15NO2406	TC00821295	B010	0.0143	ug/ml	4625	-3.37							20220328_SR2_Omi_COM
AB01974196	01	Ainno_16251	Ainnocence	AIN1-20_AINNL0020	Lot# MB15NO2406	TC00821294	B010	0.0143	ug/ml	7075	2.67							20220328_SR2_Omi_COM
AB01974196	01	Ainno_16251	Ainnocence	AIN1-20_AINNL0020	Lot# MB15NO2406	TC00821295	B011	0.00453	ug/ml	8300	1.27							20220328_SR2_Omi_COM
AB01974196	01	Ainno_16251	Ainnocence	AIN1-20_AINNL0020	Lot# MB15NO2406	TC00821294	B011	0.00453	ug/ml	5575	0.85							20220328_SR2_Omi_COM
AB01974196	01	Ainno_16251	Ainnocence	AIN1-20_AINNL0020	Lot# MB15NO2406	TC00821295	B012	0.00143	ug/ml	5875	-1.79							20220328_SR2_Omi_COM
AB01974196	01	Ainno_16251	Ainnocence	AIN1-20_AINNL0020	Lot# MB15NO2406	TC00821294	B012	0.00143	ug/ml	4900	0.02							20220328_SR2_Omi_COM
AB01974212	01	Ainno_16251	Ainnocence	AIN1-50_AINNL0050	Lot# MB15NO4150	TC00821295	B013	11.22	ug/ml	6675	-0.78	>11.22	Inactive	-10.4	1.89	>9999	20	20220328_SR2_Omi_COM
AB01974212	01	Ainno_16251	Ainnocence	AIN1-50_AINNL0050	Lot# MB15NO4150	TC00821294	B013	11.22	ug/ml	5725	1.03							20220328_SR2_Omi_COM
AB01974212	01	Ainno_16251	Ainnocence	AIN1-50_AINNL0050	Lot# MB15NO4150	TC00821295	B014	3.55	ug/ml	8050	0.95							20220328_SR2_Omi_COM
AB01974212	01	Ainno_16251	Ainnocence	AIN1-50_AINNL0050	Lot# MB15NO4150	TC00821294	B014	3.55	ug/ml	6450	1.91							20220328_SR2_Omi_COM
AB01974212	01	Ainno_16251	Ainnocence	AIN1-50_AINNL0050	Lot# MB15NO4150	TC00821295	B015	1.12	ug/ml	4425	-3.62							20220328_SR2_Omi_COM
AB01974212	01	Ainno_16251	Ainnocence	AIN1-50_AINNL0050	Lot# MB15NO4150	TC00821294	B015	1.12	ug/ml	4750	-0.16							20220328_SR2_Omi_COM
AB01974212	01	Ainno_16251	Ainnocence	AIN1-50_AINNL0050	Lot# MB15NO4150	TC00821295	B016	0.354	ug/ml	5525	-2.23							20220328_SR2_Omi_COM
AB01974212	01	Ainno_16251	Ainnocence	AIN1-50_AINNL0050	Lot# MB15NO4150	TC00821294	B016	0.354	ug/ml	5400	0.63							20220328_SR2_Omi_COM
AB01974212	01	Ainno_16251	Ainnocence	AIN1-50_AINNL0050	Lot# MB15NO4150	TC00821295	B017	0.112	ug/ml	5925	-1.73							20220328_SR2_Omi_COM
AB01974212	01	Ainno_16251	Ainnocence	AIN1-50_AINNL0050	Lot# MB15NO4150	TC00821294	B017	0.112	ug/ml	4725	-0.19							20220328_SR2_Omi_COM
AB01974212	01	Ainno_16251	Ainnocence	AIN1-50_AINNL0050	Lot# MB15NO4150	TC00821295	B018	0.0354	ug/ml	5025	-2.86							20220328_SR2_Omi_COM
AB01974212	01	Ainno_16251	Ainnocence	AIN1-50_AINNL0050	Lot# MB15NO4150	TC00821294	B018	0.0354	ug/ml	4825	-0.07							20220328_SR2_Omi_COM
AB01974212	01	Ainno_16251	Ainnocence	AIN1-50_AINNL0050	Lot# MB15NO4150	TC00821295	B019	0.0112	ug/ml	5825	-1.86							20220328_SR2_Omi_COM
AB01974212	01	Ainno_16251	Ainnocence	AIN1-50_AINNL0050	Lot# MB15NO4150	TC00821294	B019	0.0112	ug/ml	6600	2.09							20220328_SR2_Omi_COM
AB01974212	01	Ainno_16251	Ainnocence	AIN1-50_AINNL0050	Lot# MB15NO4150	TC00821295	B020	0.00354	ug/ml	4650	-3.34							20220328_SR2_Omi_COM
AB01974212	01	Ainno_16251	Ainnocence	AIN1-50_AINNL0050	Lot# MB15NO4150	TC00821294	B020	0.00354	ug/ml	4875	-0.01							20220328_SR2_Omi_COM
AB01974212	01	Ainno_16251	Ainnocence	AIN1-50_AINNL0050	Lot# MB15NO4150	TC00821295	B021	0.00112	ug/ml	5100	-2.77							20220328_SR2_Omi_COM
AB01974212	01	Ainno_16251	Ainnocence	AIN1-50_AINNL0050	Lot# MB15NO4150	TC00821294	B021	0.00112	ug/ml	5750	1.06							20220328_SR2_Omi_COM
AB01974212	01	Ainno_16251	Ainnocence	AIN1-50_AINNL0050	Lot# MB15NO4150	TC00821295	B022	0.000354	ug/ml	6875	-0.53							20220328_SR2_Omi_COM
AB01974212	01	Ainno_16251	Ainnocence	AIN1-50_AINNL0050	Lot# MB15NO4150	TC00821294	B022	0.000354	ug/ml	4675	-0.25							20220328_SR2_Omi_COM
AB01974197	01	Ainno_16251	Ainnocence	AIN1-23_AINNL0023	Lot# MB15NO2407	TC00821295	C003	3.44	ug/ml	6125	-1.48	>3.44	Inactive	-0.24	2.12	0	20	20220328_SR2_Omi_COM
AB01974197	01	Ainno_16251	Ainnocence	AIN1-23_AINNL0023	Lot# MB15NO2407	TC00821294	C003	3.44	ug/ml	6900	2.46							20220328_SR2_Omi_COM
AB01974197	01	Ainno_16251	Ainnocence	AIN1-23_AINNL0023	Lot# MB15NO2407	TC00821295	C004	1.09	ug/ml	7700	0.51							20220328_SR2_Omi_COM
AB01974197	01	Ainno_16251	Ainnocence	AIN1-23_AINNL0023	Lot# MB15NO2407	TC00821294	C004	1.09	ug/ml	4500	-0.46							20220328_SR2_Omi_COM
AB01974197	01	Ainno_16251	Ainnocence	AIN1-23_AINNL0023	Lot# MB15NO2407	TC00821295	C005	0.345	ug/ml	4450	-3.59							20220328_SR2_Omi_COM
AB01974197	01	Ainno_16251	Ainnocence	AIN1-23_AINNL0023	Lot# MB15NO2407	TC00821294	C005	0.345	ug/ml	5650	0.94							20220328_SR2_Omi_COM
AB01974197	01	Ainno_16251	Ainnocence	AIN1-23_AINNL0023	Lot# MB15NO2407	TC00821295	C006	0.109	ug/ml	6100	-1.51							20220328_SR2_Omi_COM
AB01974197	01	Ainno_16251	Ainnocence	AIN1-23_AINNL0023	Lot# MB15NO2407	TC00821294	C006	0.109	ug/ml	3625	-1.53							20220328_SR2_Omi_COM
AB01974197	01	Ainno_16251	Ainnocence	AIN1-23_AINNL0023	Lot# MB15NO2407	TC00821295	C007	0.0345	ug/ml	6450	-1.07							20220328_SR2_Omi_COM
AB01974197	01	Ainno_16251	Ainnocence	AIN1-23_AINNL0023	Lot# MB15NO2407	TC00821294	C007	0.0345	ug/ml	7250	2.88							20220328_SR2_Omi_COM
AB01974197	01	Ainno_16251	Ainnocence	AIN1-23_AINNL0023	Lot# MB15NO2407	TC00821295	C008	0.0109	ug/ml	4150	-3.97							20220328_SR2_Omi_COM
AB01974197	01	Ainno_16251	Ainnocence	AIN1-23_AINNL0023	Lot# MB15NO2407	TC00821294	C008	0.0109	ug/ml	5050	0.21							20220328_SR2_Omi_COM
AB01974197	01	Ainno_16251	Ainnocence	AIN1-23_AINNL0023	Lot# MB15NO2407	TC00821295	C009	0.00345	ug/ml	5150	-2.71							20220328_SR2_Omi_COM
AB01974197	01	Ainno_16251	Ainnocence	AIN1-23_AINNL0023	Lot# MB15NO2407	TC00821294	C009	0.00345	ug/ml	5350	0.57							20220328_SR2_Omi_COM
AB01974197	01	Ainno_16251	Ainnocence	AIN1-23_AINNL0023	Lot# MB15NO2407	TC00821295	C010	0.00109	ug/ml	7125	-0.21							20220328_SR2_Omi_COM
AB01974197	01	Ainno_16251	Ainnocence	AIN1-23_AINNL0023	Lot# MB15NO2407	TC00821294	C010	0.00109	ug/ml	4150	-0.89							20220328_SR2_Omi_COM
AB01974197	01	Ainno_16251	Ainnocence	AIN1-23_AINNL0023	Lot# MB15NO2407	TC00821295	C011	0.000345	ug/ml	5175	-2.68							20220328_SR2_Omi_COM
AB01974197	01	Ainno_16251	Ainnocence	AIN1-23_AINNL0023	Lot# MB15NO2407	TC00821294	C011	0.000345	ug/ml	6925	2.49							20220328_SR2_Omi_COM
AB01974197	01	Ainno_16251	Ainnocence	AIN1-23_AINNL0023	Lot# MB15NO2407	TC00821295	C012	0.000109	ug/ml	5300	-2.52							20220328_SR2_Omi_COM
AB01974197	01	Ainno_16251	Ainnocence	AIN1-23_AINNL0023	Lot# MB15NO2407	TC00821294	C012	0.000109	ug/ml	4925	0.05							20220328_SR2_Omi_COM
AB01974213	01	Ainno_16251	Ainnocence	AIN1-16_AINNL0016	Lot# MB15NO4116	TC00821295	C013	11.44	ug/ml	7475	0.23	>11.44	Inactive	0.89	2.11	>9999	20	20220328_SR2_Omi_COM
AB01974213	01	Ainno_16251	Ainnocence	AIN1-16_AINNL0016	Lot# MB15NO4116	TC00821294	C013	11.44	ug/ml	4825	-0.07							20220328_SR2_Omi_COM
AB01974213	01	Ainno_16251	Ainnocence	AIN1-16_AINNL0016	Lot# MB15NO4116	TC00821295	C014	3.62	ug/ml	6375	-1.16							20220328_SR2_Omi_COM
AB01974213	01	Ainno_16251	Ainnocence	AIN1-16_AINNL0016	Lot# MB15NO4116	TC00821294	C014	3.62	ug/ml	5450	0.69							20220328_SR2_Omi_COM
AB01974213	01	Ainno_16251	Ainnocence	AIN1-16_AINNL0016	Lot# MB15NO4116	TC00821295	C015	1.15	ug/ml	8025	0.92							20220328_SR2_Omi_COM
AB01974213	01	Ainno_16251	Ainnocence	AIN1-16_AINNL0016	Lot# MB15NO4116	TC00821294	C015	1.15	ug/ml	6200	1.61							20220328_SR2_Omi_COM
AB01974213	01	Ainno_16251	Ainnocence	AIN1-16_AINNL0016	Lot# MB15NO4116	TC00821295	C016	0.364	ug/ml	4600	-3.4							20220328_SR2_Omi_COM
AB01974213	01	Ainno_16251	Ainnocence	AIN1-16_AINNL0016	Lot# MB15NO4116	TC00821294	C016	0.364	ug/ml	7075	2.67							20220328_SR2_Omi_COM
AB01974213	01	Ainno_16251	Ainnocence	AIN1-16_AINNL0016	Lot# MB15NO4116	TC00821295	C017	0.115	ug/ml	5925	-1.73							20220328_SR2_Omi_COM
AB01974213	01	Ainno_16251	Ainnocence	AIN1-16_AINNL0016	Lot# MB15NO4116	TC00821294	C017	0.115	ug/ml	3200	-2.05							20220328_SR2_Omi_COM
AB01974213	01	Ainno_16251	Ainnocence	AIN1-16_AINNL0016	Lot# MB15NO4116	TC00821295	C018	0.0364	ug/ml	5450	-2.33							20220328_SR2_Omi_COM
AB01974213	01	Ainno_16251	Ainnocence	AIN1-16_AINNL0016	Lot# MB15NO4116	TC00821294	C018	0.0364	ug/ml	5050	0.21							20220328_SR2_Omi_COM
AB01974213	01	Ainno_16251	Ainnocence	AIN1-16_AINNL0016	Lot# MB15NO4116	TC00821295	C019	0.0115	ug/ml	5500	-2.27							20220328_SR2_Omi_COM
AB01974213	01	Ainno_16251	Ainnocence	AIN1-16_AINNL0016	Lot# MB15NO4116	TC00821294	C019	0.0115	ug/ml	3475	-1.71							20220328_SR2_Omi_COM
AB01974213	01	Ainno_16251	Ainnocence	AIN1-16_AINNL0016	Lot# MB15NO4116	TC00821295	C020	0.00364	ug/ml	7025	-0.34							20220328_SR2_Omi_COM
AB01974213	01	Ainno_16251	Ainnocence	AIN1-16_AINNL0016	Lot# MB15NO4116	TC00821294	C020	0.00364	ug/ml	8450	4.35							20220328_SR2_Omi_COM
AB01974213	01	Ainno_16251	Ainnocence	AIN1-16_AINNL0016	Lot# MB15NO4116	TC00821295	C021	0.00115	ug/ml	5150	-2.71							20220328_SR2_Omi_COM
AB01974213	01	Ainno_16251	Ainnocence	AIN1-16_AINNL0016	Lot# MB15NO4116	TC00821294	C021	0.00115	ug/ml	3250	-1.98							20220328_SR2_Omi_COM
AB01974213	01	Ainno_16251	Ainnocence	AIN1-16_AINNL0016	Lot# MB15NO4116	TC00821295	C022	0.000364	ug/ml	8525	1.55							20220328_SR2_Omi_COM
AB01974213	01	Ainno_16251	Ainnocence	AIN1-16_AINNL0016	Lot# MB15NO4116	TC00821294	C022	0.000364	ug/ml	3525	-1.65							20220328_SR2_Omi_COM
AB01974198	01	Ainno_16251	Ainnocence	AIN1-19_AINNL0019	Lot# MB15NO4119	TC00821295	D003	11.67	ug/ml	7925	0.8	>11.67	Inactive	-0.93	104.96	>9999	20	20220328_SR2_Omi_COM
AB01974198	01	Ainno_16251	Ainnocence	AIN1-19_AINNL0019	Lot# MB15NO4119	TC00821294	D003	11.67	ug/ml	8575	4.5							20220328_SR2_Omi_COM
AB01974198	01	Ainno_16251	Ainnocence	AIN1-19_AINNL0019	Lot# MB15NO4119	TC00821295	D004	3.69	ug/ml	3425	-4.88							20220328_SR2_Omi_COM
AB01974198	01	Ainno_16251	Ainnocence	AIN1-19_AINNL0019	Lot# MB15NO4119	TC00821294	D004	3.69	ug/ml	8125	3.95							20220328_SR2_Omi_COM
AB01974198	01	Ainno_16251	Ainnocence	AIN1-19_AINNL0019	Lot# MB15NO4119	TC00821295	D005	1.17	ug/ml	6100	-1.51							20220328_SR2_Omi_COM
AB01974198	01	Ainno_16251	Ainnocence	AIN1-19_AINNL0019	Lot# MB15NO4119	TC00821294	D005	1.17	ug/ml	4125	-0.92							20220328_SR2_Omi_COM
AB01974198	01	Ainno_16251	Ainnocence	AIN1-19_AINNL0019	Lot# MB15NO4119	TC00821295	D006	0.37	ug/ml	5150	-2.71							20220328_SR2_Omi_COM
AB01974198	01	Ainno_16251	Ainnocence	AIN1-19_AINNL0019	Lot# MB15NO4119	TC00821294	D006	0.37	ug/ml	6025	1.39							20220328_SR2_Omi_COM
AB01974198	01	Ainno_16251	Ainnocence	AIN1-19_AINNL0019	Lot# MB15NO4119	TC00821295	D007	0.117	ug/ml	7975	0.86							20220328_SR2_Omi_COM
AB01974198	01	Ainno_16251	Ainnocence	AIN1-19_AINNL0019	Lot# MB15NO4119	TC00821294	D007	0.117	ug/ml	5000	0.15							20220328_SR2_Omi_COM
AB01974198	01	Ainno_16251	Ainnocence	AIN1-19_AINNL0019	Lot# MB15NO4119	TC00821295	D008	0.037	ug/ml	7950	0.83							20220328_SR2_Omi_COM
AB01974198	01	Ainno_16251	Ainnocence	AIN1-19_AINNL0019	Lot# MB15NO4119	TC00821294	D008	0.037	ug/ml	5625	0.91							20220328_SR2_Omi_COM
AB01974198	01	Ainno_16251	Ainnocence	AIN1-19_AINNL0019	Lot# MB15NO4119	TC00821295	D009	0.0117	ug/ml	8500	1.52							20220328_SR2_Omi_COM
AB01974198	01	Ainno_16251	Ainnocence	AIN1-19_AINNL0019	Lot# MB15NO4119	TC00821294	D009	0.0117	ug/ml	6075	1.45							20220328_SR2_Omi_COM
AB01974198	01	Ainno_16251	Ainnocence	AIN1-19_AINNL0019	Lot# MB15NO4119	TC00821295	D010	0.0037	ug/ml	6725	-0.72							20220328_SR2_Omi_COM
AB01974198	01	Ainno_16251	Ainnocence	AIN1-19_AINNL0019	Lot# MB15NO4119	TC00821294	D010	0.0037	ug/ml	4525	-0.43							20220328_SR2_Omi_COM
AB01974198	01	Ainno_16251	Ainnocence	AIN1-19_AINNL0019	Lot# MB15NO4119	TC00821295	D011	0.00117	ug/ml	5925	-1.73							20220328_SR2_Omi_COM
AB01974198	01	Ainno_16251	Ainnocence	AIN1-19_AINNL0019	Lot# MB15NO4119	TC00821294	D011	0.00117	ug/ml	5900	1.24							20220328_SR2_Omi_COM
AB01974198	01	Ainno_16251	Ainnocence	AIN1-19_AINNL0019	Lot# MB15NO4119	TC00821295	D012	0.00037	ug/ml	10925	4.58							20220328_SR2_Omi_COM
AB01974198	01	Ainno_16251	Ainnocence	AIN1-19_AINNL0019	Lot# MB15NO4119	TC00821294	D012	0.00037	ug/ml	4700	-0.22							20220328_SR2_Omi_COM
AB01974161	01	Ainno_16251	Ainnocence	AIN2-1_REGN10933	Lot# MB15OC1436	TC00821295	D013	10	ug/ml	82875	95.41	0.34	Active	10.77	11.88	18.32	20	20220328_SR2_Omi_COM
AB01974161	01	Ainno_16251	Ainnocence	AIN2-1_REGN10933	Lot# MB15OC1436	TC00821294	D013	10	ug/ml	87650	100.76							20220328_SR2_Omi_COM
AB01974161	01	Ainno_16251	Ainnocence	AIN2-1_REGN10933	Lot# MB15OC1436	TC00821295	D014	3.16	ug/ml	87900	101.75							20220328_SR2_Omi_COM
AB01974161	01	Ainno_16251	Ainnocence	AIN2-1_REGN10933	Lot# MB15OC1436	TC00821294	D014	3.16	ug/ml	87675	100.79							20220328_SR2_Omi_COM
AB01974161	01	Ainno_16251	Ainnocence	AIN2-1_REGN10933	Lot# MB15OC1436	TC00821295	D015	1	ug/ml	90125	104.56							20220328_SR2_Omi_COM
AB01974161	01	Ainno_16251	Ainnocence	AIN2-1_REGN10933	Lot# MB15OC1436	TC00821294	D015	1	ug/ml	119550	139.59							20220328_SR2_Omi_COM
AB01974161	01	Ainno_16251	Ainnocence	AIN2-1_REGN10933	Lot# MB15OC1436	TC00821295	D016	0.316	ug/ml	30675	29.51							20220328_SR2_Omi_COM
AB01974161	01	Ainno_16251	Ainnocence	AIN2-1_REGN10933	Lot# MB15OC1436	TC00821294	D016	0.316	ug/ml	31100	31.92							20220328_SR2_Omi_COM
AB01974161	01	Ainno_16251	Ainnocence	AIN2-1_REGN10933	Lot# MB15OC1436	TC00821295	D017	0.1	ug/ml	23200	20.08							20220328_SR2_Omi_COM
AB01974161	01	Ainno_16251	Ainnocence	AIN2-1_REGN10933	Lot# MB15OC1436	TC00821294	D017	0.1	ug/ml	20625	19.17							20220328_SR2_Omi_COM
AB01974161	01	Ainno_16251	Ainnocence	AIN2-1_REGN10933	Lot# MB15OC1436	TC00821295	D018	0.0316	ug/ml	9375	2.63							20220328_SR2_Omi_COM
AB01974161	01	Ainno_16251	Ainnocence	AIN2-1_REGN10933	Lot# MB15OC1436	TC00821294	D018	0.0316	ug/ml	6125	1.52							20220328_SR2_Omi_COM
AB01974161	01	Ainno_16251	Ainnocence	AIN2-1_REGN10933	Lot# MB15OC1436	TC00821295	D019	0.01	ug/ml	6150	-1.44							20220328_SR2_Omi_COM
AB01974161	01	Ainno_16251	Ainnocence	AIN2-1_REGN10933	Lot# MB15OC1436	TC00821294	D019	0.01	ug/ml	13575	10.58							20220328_SR2_Omi_COM
AB01974161	01	Ainno_16251	Ainnocence	AIN2-1_REGN10933	Lot# MB15OC1436	TC00821295	D020	0.00316	ug/ml	5650	-2.08							20220328_SR2_Omi_COM
AB01974161	01	Ainno_16251	Ainnocence	AIN2-1_REGN10933	Lot# MB15OC1436	TC00821294	D020	0.00316	ug/ml	6475	1.94							20220328_SR2_Omi_COM
AB01974161	01	Ainno_16251	Ainnocence	AIN2-1_REGN10933	Lot# MB15OC1436	TC00821295	D021	0.001	ug/ml	9425	2.69							20220328_SR2_Omi_COM
AB01974161	01	Ainno_16251	Ainnocence	AIN2-1_REGN10933	Lot# MB15OC1436	TC00821294	D021	0.001	ug/ml	6375	1.82							20220328_SR2_Omi_COM
AB01974161	01	Ainno_16251	Ainnocence	AIN2-1_REGN10933	Lot# MB15OC1436	TC00821295	D022	0.000316	ug/ml	9550	2.85							20220328_SR2_Omi_COM
AB01974161	01	Ainno_16251	Ainnocence	AIN2-1_REGN10933	Lot# MB15OC1436	TC00821294	D022	0.000316	ug/ml	6525	2							20220328_SR2_Omi_COM
AB01974199	01	Ainno_16251	Ainnocence	AIN1-24_AINNL0024	Lot# MB15NO4124	TC00821295	E003	12.11	ug/ml	8975	2.12	>12.11	Inactive	0.21	3.35	>9999	20	20220328_SR2_Omi_COM
AB01974199	01	Ainno_16251	Ainnocence	AIN1-24_AINNL0024	Lot# MB15NO4124	TC00821294	E003	12.11	ug/ml	3975	-1.1							20220328_SR2_Omi_COM
AB01974199	01	Ainno_16251	Ainnocence	AIN1-24_AINNL0024	Lot# MB15NO4124	TC00821295	E004	3.83	ug/ml	8625	1.68							20220328_SR2_Omi_COM
AB01974199	01	Ainno_16251	Ainnocence	AIN1-24_AINNL0024	Lot# MB15NO4124	TC00821294	E004	3.83	ug/ml	7000	2.58							20220328_SR2_Omi_COM
AB01974199	01	Ainno_16251	Ainnocence	AIN1-24_AINNL0024	Lot# MB15NO4124	TC00821295	E005	1.21	ug/ml	11950	5.88							20220328_SR2_Omi_COM
AB01974199	01	Ainno_16251	Ainnocence	AIN1-24_AINNL0024	Lot# MB15NO4124	TC00821294	E005	1.21	ug/ml	4850	-0.04							20220328_SR2_Omi_COM
AB01974199	01	Ainno_16251	Ainnocence	AIN1-24_AINNL0024	Lot# MB15NO4124	TC00821295	E006	0.383	ug/ml	6425	-1.1							20220328_SR2_Omi_COM
AB01974199	01	Ainno_16251	Ainnocence	AIN1-24_AINNL0024	Lot# MB15NO4124	TC00821294	E006	0.383	ug/ml	13400	10.37							20220328_SR2_Omi_COM
AB01974199	01	Ainno_16251	Ainnocence	AIN1-24_AINNL0024	Lot# MB15NO4124	TC00821295	E007	0.121	ug/ml	5300	-2.52							20220328_SR2_Omi_COM
AB01974199	01	Ainno_16251	Ainnocence	AIN1-24_AINNL0024	Lot# MB15NO4124	TC00821294	E007	0.121	ug/ml	7725	3.46							20220328_SR2_Omi_COM
AB01974199	01	Ainno_16251	Ainnocence	AIN1-24_AINNL0024	Lot# MB15NO4124	TC00821295	E008	0.0383	ug/ml	6600	-0.88							20220328_SR2_Omi_COM
AB01974199	01	Ainno_16251	Ainnocence	AIN1-24_AINNL0024	Lot# MB15NO4124	TC00821294	E008	0.0383	ug/ml	4950	0.08							20220328_SR2_Omi_COM
AB01974199	01	Ainno_16251	Ainnocence	AIN1-24_AINNL0024	Lot# MB15NO4124	TC00821295	E009	0.0121	ug/ml	5000	-2.9							20220328_SR2_Omi_COM
AB01974199	01	Ainno_16251	Ainnocence	AIN1-24_AINNL0024	Lot# MB15NO4124	TC00821294	E009	0.0121	ug/ml	4150	-0.89							20220328_SR2_Omi_COM
AB01974199	01	Ainno_16251	Ainnocence	AIN1-24_AINNL0024	Lot# MB15NO4124	TC00821295	E010	0.00383	ug/ml	4625	-3.37							20220328_SR2_Omi_COM
AB01974199	01	Ainno_16251	Ainnocence	AIN1-24_AINNL0024	Lot# MB15NO4124	TC00821294	E010	0.00383	ug/ml	4200	-0.83							20220328_SR2_Omi_COM
AB01974199	01	Ainno_16251	Ainnocence	AIN1-24_AINNL0024	Lot# MB15NO4124	TC00821295	E011	0.00121	ug/ml	6750	-0.69							20220328_SR2_Omi_COM
AB01974199	01	Ainno_16251	Ainnocence	AIN1-24_AINNL0024	Lot# MB15NO4124	TC00821294	E011	0.00121	ug/ml	5725	1.03							20220328_SR2_Omi_COM
AB01974199	01	Ainno_16251	Ainnocence	AIN1-24_AINNL0024	Lot# MB15NO4124	TC00821295	E012	0.000383	ug/ml	6425	-1.1							20220328_SR2_Omi_COM
AB01974199	01	Ainno_16251	Ainnocence	AIN1-24_AINNL0024	Lot# MB15NO4124	TC00821294	E012	0.000383	ug/ml	9050	5.08							20220328_SR2_Omi_COM
AB01974162	01	Ainno_16251	Ainnocence	AIN2-2_REGN10987	Lot# MB15OC1437	TC00821295	E013	10	ug/ml	6150	-1.44	>10.00	Inactive	0.25	2.32	>9999	20	20220328_SR2_Omi_COM
AB01974162	01	Ainno_16251	Ainnocence	AIN2-2_REGN10987	Lot# MB15OC1437	TC00821294	E013	10	ug/ml	9350	5.44							20220328_SR2_Omi_COM
AB01974162	01	Ainno_16251	Ainnocence	AIN2-2_REGN10987	Lot# MB15OC1437	TC00821295	E014	3.16	ug/ml	8375	1.36							20220328_SR2_Omi_COM
AB01974162	01	Ainno_16251	Ainnocence	AIN2-2_REGN10987	Lot# MB15OC1437	TC00821294	E014	3.16	ug/ml	7325	2.98							20220328_SR2_Omi_COM
AB01974162	01	Ainno_16251	Ainnocence	AIN2-2_REGN10987	Lot# MB15OC1437	TC00821295	E015	1	ug/ml	7425	0.16							20220328_SR2_Omi_COM
AB01974162	01	Ainno_16251	Ainnocence	AIN2-2_REGN10987	Lot# MB15OC1437	TC00821294	E015	1	ug/ml	6900	2.46							20220328_SR2_Omi_COM
AB01974162	01	Ainno_16251	Ainnocence	AIN2-2_REGN10987	Lot# MB15OC1437	TC00821295	E016	0.316	ug/ml	6575	-0.91							20220328_SR2_Omi_COM
AB01974162	01	Ainno_16251	Ainnocence	AIN2-2_REGN10987	Lot# MB15OC1437	TC00821294	E016	0.316	ug/ml	5000	0.15							20220328_SR2_Omi_COM
AB01974162	01	Ainno_16251	Ainnocence	AIN2-2_REGN10987	Lot# MB15OC1437	TC00821295	E017	0.1	ug/ml	4725	-3.24							20220328_SR2_Omi_COM
AB01974162	01	Ainno_16251	Ainnocence	AIN2-2_REGN10987	Lot# MB15OC1437	TC00821294	E017	0.1	ug/ml	4925	0.05							20220328_SR2_Omi_COM
AB01974162	01	Ainno_16251	Ainnocence	AIN2-2_REGN10987	Lot# MB15OC1437	TC00821295	E018	0.0316	ug/ml	8750	1.84							20220328_SR2_Omi_COM
AB01974162	01	Ainno_16251	Ainnocence	AIN2-2_REGN10987	Lot# MB15OC1437	TC00821294	E018	0.0316	ug/ml	7325	2.98							20220328_SR2_Omi_COM
AB01974162	01	Ainno_16251	Ainnocence	AIN2-2_REGN10987	Lot# MB15OC1437	TC00821295	E019	0.01	ug/ml	4875	-3.05							20220328_SR2_Omi_COM
AB01974162	01	Ainno_16251	Ainnocence	AIN2-2_REGN10987	Lot# MB15OC1437	TC00821294	E019	0.01	ug/ml	3350	-1.86							20220328_SR2_Omi_COM
AB01974162	01	Ainno_16251	Ainnocence	AIN2-2_REGN10987	Lot# MB15OC1437	TC00821295	E020	0.00316	ug/ml	6650	-0.81							20220328_SR2_Omi_COM
AB01974162	01	Ainno_16251	Ainnocence	AIN2-2_REGN10987	Lot# MB15OC1437	TC00821294	E020	0.00316	ug/ml	5900	1.24							20220328_SR2_Omi_COM
AB01974162	01	Ainno_16251	Ainnocence	AIN2-2_REGN10987	Lot# MB15OC1437	TC00821295	E021	0.001	ug/ml	4425	-3.62							20220328_SR2_Omi_COM
AB01974162	01	Ainno_16251	Ainnocence	AIN2-2_REGN10987	Lot# MB15OC1437	TC00821294	E021	0.001	ug/ml	4975	0.12							20220328_SR2_Omi_COM
AB01974162	01	Ainno_16251	Ainnocence	AIN2-2_REGN10987	Lot# MB15OC1437	TC00821295	E022	0.000316	ug/ml	9725	3.07							20220328_SR2_Omi_COM
AB01974162	01	Ainno_16251	Ainnocence	AIN2-2_REGN10987	Lot# MB15OC1437	TC00821294	E022	0.000316	ug/ml	4575	-0.37							20220328_SR2_Omi_COM
AB01974200	01	Ainno_16251	Ainnocence	AIN1-25_AINNL0025	Lot# MB15NO4125	TC00821295	F003	7.67	ug/ml	9150	2.34	>7.67	Inactive	0.26	2.32	>9999	20	20220328_SR2_Omi_COM
AB01974200	01	Ainno_16251	Ainnocence	AIN1-25_AINNL0025	Lot# MB15NO4125	TC00821294	F003	7.67	ug/ml	7875	3.65							20220328_SR2_Omi_COM
AB01974200	01	Ainno_16251	Ainnocence	AIN1-25_AINNL0025	Lot# MB15NO4125	TC00821295	F004	2.43	ug/ml	10125	3.57							20220328_SR2_Omi_COM
AB01974200	01	Ainno_16251	Ainnocence	AIN1-25_AINNL0025	Lot# MB15NO4125	TC00821294	F004	2.43	ug/ml	5975	1.33							20220328_SR2_Omi_COM
AB01974200	01	Ainno_16251	Ainnocence	AIN1-25_AINNL0025	Lot# MB15NO4125	TC00821295	F005	0.769	ug/ml	6500	-1							20220328_SR2_Omi_COM
AB01974200	01	Ainno_16251	Ainnocence	AIN1-25_AINNL0025	Lot# MB15NO4125	TC00821294	F005	0.769	ug/ml	4650	-0.28							20220328_SR2_Omi_COM
AB01974200	01	Ainno_16251	Ainnocence	AIN1-25_AINNL0025	Lot# MB15NO4125	TC00821295	F006	0.243	ug/ml	5575	-2.17							20220328_SR2_Omi_COM
AB01974200	01	Ainno_16251	Ainnocence	AIN1-25_AINNL0025	Lot# MB15NO4125	TC00821294	F006	0.243	ug/ml	4700	-0.22							20220328_SR2_Omi_COM
AB01974200	01	Ainno_16251	Ainnocence	AIN1-25_AINNL0025	Lot# MB15NO4125	TC00821295	F007	0.0769	ug/ml	5950	-1.7							20220328_SR2_Omi_COM
AB01974200	01	Ainno_16251	Ainnocence	AIN1-25_AINNL0025	Lot# MB15NO4125	TC00821294	F007	0.0769	ug/ml	8300	4.16							20220328_SR2_Omi_COM
AB01974200	01	Ainno_16251	Ainnocence	AIN1-25_AINNL0025	Lot# MB15NO4125	TC00821295	F008	0.0243	ug/ml	5350	-2.45							20220328_SR2_Omi_COM
AB01974200	01	Ainno_16251	Ainnocence	AIN1-25_AINNL0025	Lot# MB15NO4125	TC00821294	F008	0.0243	ug/ml	7075	2.67							20220328_SR2_Omi_COM
AB01974200	01	Ainno_16251	Ainnocence	AIN1-25_AINNL0025	Lot# MB15NO4125	TC00821295	F009	0.00769	ug/ml	5925	-1.73							20220328_SR2_Omi_COM
AB01974200	01	Ainno_16251	Ainnocence	AIN1-25_AINNL0025	Lot# MB15NO4125	TC00821294	F009	0.00769	ug/ml	3650	-1.5							20220328_SR2_Omi_COM
AB01974200	01	Ainno_16251	Ainnocence	AIN1-25_AINNL0025	Lot# MB15NO4125	TC00821295	F010	0.00243	ug/ml	5150	-2.71							20220328_SR2_Omi_COM
AB01974200	01	Ainno_16251	Ainnocence	AIN1-25_AINNL0025	Lot# MB15NO4125	TC00821294	F010	0.00243	ug/ml	5450	0.69							20220328_SR2_Omi_COM
AB01974200	01	Ainno_16251	Ainnocence	AIN1-25_AINNL0025	Lot# MB15NO4125	TC00821295	F011	0.000769	ug/ml	6625	-0.85							20220328_SR2_Omi_COM
AB01974200	01	Ainno_16251	Ainnocence	AIN1-25_AINNL0025	Lot# MB15NO4125	TC00821294	F011	0.000769	ug/ml	7650	3.37							20220328_SR2_Omi_COM
AB01974200	01	Ainno_16251	Ainnocence	AIN1-25_AINNL0025	Lot# MB15NO4125	TC00821295	F012	0.000243	ug/ml	5200	-2.64							20220328_SR2_Omi_COM
AB01974200	01	Ainno_16251	Ainnocence	AIN1-25_AINNL0025	Lot# MB15NO4125	TC00821294	F012	0.000243	ug/ml	7100	2.7							20220328_SR2_Omi_COM
AB01974201	01	Ainno_16251	Ainnocence	AIN1-27_AINNL0027	Lot# MB15NO1901	TC00821295	G003	1.44	ug/ml	5450	-2.33	>1.44	Inactive	9.39	2.98	>9999	20	20220328_SR2_Omi_COM
AB01974201	01	Ainno_16251	Ainnocence	AIN1-27_AINNL0027	Lot# MB15NO1901	TC00821294	G003	1.44	ug/ml	7375	3.04							20220328_SR2_Omi_COM
AB01974201	01	Ainno_16251	Ainnocence	AIN1-27_AINNL0027	Lot# MB15NO1901	TC00821295	G004	0.456	ug/ml	4075	-4.06							20220328_SR2_Omi_COM
AB01974201	01	Ainno_16251	Ainnocence	AIN1-27_AINNL0027	Lot# MB15NO1901	TC00821294	G004	0.456	ug/ml	4050	-1.01							20220328_SR2_Omi_COM
AB01974201	01	Ainno_16251	Ainnocence	AIN1-27_AINNL0027	Lot# MB15NO1901	TC00821295	G005	0.144	ug/ml	8100	1.02							20220328_SR2_Omi_COM
AB01974201	01	Ainno_16251	Ainnocence	AIN1-27_AINNL0027	Lot# MB15NO1901	TC00821294	G005	0.144	ug/ml	10350	6.66							20220328_SR2_Omi_COM
AB01974201	01	Ainno_16251	Ainnocence	AIN1-27_AINNL0027	Lot# MB15NO1901	TC00821295	G006	0.0456	ug/ml	6975	-0.4							20220328_SR2_Omi_COM
AB01974201	01	Ainno_16251	Ainnocence	AIN1-27_AINNL0027	Lot# MB15NO1901	TC00821294	G006	0.0456	ug/ml	4900	0.02							20220328_SR2_Omi_COM
AB01974201	01	Ainno_16251	Ainnocence	AIN1-27_AINNL0027	Lot# MB15NO1901	TC00821295	G007	0.0144	ug/ml	5450	-2.33							20220328_SR2_Omi_COM
AB01974201	01	Ainno_16251	Ainnocence	AIN1-27_AINNL0027	Lot# MB15NO1901	TC00821294	G007	0.0144	ug/ml	4400	-0.58							20220328_SR2_Omi_COM
AB01974201	01	Ainno_16251	Ainnocence	AIN1-27_AINNL0027	Lot# MB15NO1901	TC00821295	G008	0.00456	ug/ml	5350	-2.45							20220328_SR2_Omi_COM
AB01974201	01	Ainno_16251	Ainnocence	AIN1-27_AINNL0027	Lot# MB15NO1901	TC00821294	G008	0.00456	ug/ml	6575	2.06							20220328_SR2_Omi_COM
AB01974201	01	Ainno_16251	Ainnocence	AIN1-27_AINNL0027	Lot# MB15NO1901	TC00821295	G009	0.00144	ug/ml	9150	2.34							20220328_SR2_Omi_COM
AB01974201	01	Ainno_16251	Ainnocence	AIN1-27_AINNL0027	Lot# MB15NO1901	TC00821294	G009	0.00144	ug/ml	10050	6.29							20220328_SR2_Omi_COM
AB01974201	01	Ainno_16251	Ainnocence	AIN1-27_AINNL0027	Lot# MB15NO1901	TC00821295	G010	0.000456	ug/ml	6175	-1.41							20220328_SR2_Omi_COM
AB01974201	01	Ainno_16251	Ainnocence	AIN1-27_AINNL0027	Lot# MB15NO1901	TC00821294	G010	0.000456	ug/ml	5250	0.45							20220328_SR2_Omi_COM
AB01974201	01	Ainno_16251	Ainnocence	AIN1-27_AINNL0027	Lot# MB15NO1901	TC00821295	G011	0.000144	ug/ml	4550	-3.46							20220328_SR2_Omi_COM
AB01974201	01	Ainno_16251	Ainnocence	AIN1-27_AINNL0027	Lot# MB15NO1901	TC00821294	G011	0.000144	ug/ml	5925	1.27							20220328_SR2_Omi_COM
AB01974201	01	Ainno_16251	Ainnocence	AIN1-27_AINNL0027	Lot# MB15NO1901	TC00821295	G012	4.6e-05	ug/ml	5550	-2.2							20220328_SR2_Omi_COM
AB01974201	01	Ainno_16251	Ainnocence	AIN1-27_AINNL0027	Lot# MB15NO1901	TC00821294	G012	4.6e-05	ug/ml	4250	-0.77							20220328_SR2_Omi_COM
AB01974202	01	Ainno_16251	Ainnocence	AIN1-34_AINNL0034	Lot# MB15NO1902	TC00821295	H003	2.56	ug/ml	9900	3.29	>2.56	Inactive	0.99	2.6	>9999	20	20220328_SR2_Omi_COM
AB01974202	01	Ainno_16251	Ainnocence	AIN1-34_AINNL0034	Lot# MB15NO1902	TC00821294	H003	2.56	ug/ml	7475	3.16							20220328_SR2_Omi_COM
AB01974202	01	Ainno_16251	Ainnocence	AIN1-34_AINNL0034	Lot# MB15NO1902	TC00821295	H004	0.81	ug/ml	8150	1.08							20220328_SR2_Omi_COM
AB01974202	01	Ainno_16251	Ainnocence	AIN1-34_AINNL0034	Lot# MB15NO1902	TC00821294	H004	0.81	ug/ml	5925	1.27							20220328_SR2_Omi_COM
AB01974202	01	Ainno_16251	Ainnocence	AIN1-34_AINNL0034	Lot# MB15NO1902	TC00821295	H005	0.256	ug/ml	5125	-2.74							20220328_SR2_Omi_COM
AB01974202	01	Ainno_16251	Ainnocence	AIN1-34_AINNL0034	Lot# MB15NO1902	TC00821294	H005	0.256	ug/ml	5775	1.09							20220328_SR2_Omi_COM
AB01974202	01	Ainno_16251	Ainnocence	AIN1-34_AINNL0034	Lot# MB15NO1902	TC00821295	H006	0.081	ug/ml	4250	-3.84							20220328_SR2_Omi_COM
AB01974202	01	Ainno_16251	Ainnocence	AIN1-34_AINNL0034	Lot# MB15NO1902	TC00821294	H006	0.081	ug/ml	4550	-0.4							20220328_SR2_Omi_COM
AB01974202	01	Ainno_16251	Ainnocence	AIN1-34_AINNL0034	Lot# MB15NO1902	TC00821295	H007	0.0256	ug/ml	6025	-1.6							20220328_SR2_Omi_COM
AB01974202	01	Ainno_16251	Ainnocence	AIN1-34_AINNL0034	Lot# MB15NO1902	TC00821294	H007	0.0256	ug/ml	5350	0.57							20220328_SR2_Omi_COM
AB01974202	01	Ainno_16251	Ainnocence	AIN1-34_AINNL0034	Lot# MB15NO1902	TC00821295	H008	0.0081	ug/ml	6925	-0.47							20220328_SR2_Omi_COM
AB01974202	01	Ainno_16251	Ainnocence	AIN1-34_AINNL0034	Lot# MB15NO1902	TC00821294	H008	0.0081	ug/ml	5550	0.82							20220328_SR2_Omi_COM
AB01974202	01	Ainno_16251	Ainnocence	AIN1-34_AINNL0034	Lot# MB15NO1902	TC00821295	H009	0.00256	ug/ml	12825	6.98							20220328_SR2_Omi_COM
AB01974202	01	Ainno_16251	Ainnocence	AIN1-34_AINNL0034	Lot# MB15NO1902	TC00821294	H009	0.00256	ug/ml	7250	2.88							20220328_SR2_Omi_COM
AB01974202	01	Ainno_16251	Ainnocence	AIN1-34_AINNL0034	Lot# MB15NO1902	TC00821295	H010	0.00081	ug/ml	5150	-2.71							20220328_SR2_Omi_COM
AB01974202	01	Ainno_16251	Ainnocence	AIN1-34_AINNL0034	Lot# MB15NO1902	TC00821294	H010	0.00081	ug/ml	5025	0.18							20220328_SR2_Omi_COM
AB01974202	01	Ainno_16251	Ainnocence	AIN1-34_AINNL0034	Lot# MB15NO1902	TC00821295	H011	0.000256	ug/ml	6425	-1.1							20220328_SR2_Omi_COM
AB01974202	01	Ainno_16251	Ainnocence	AIN1-34_AINNL0034	Lot# MB15NO1902	TC00821294	H011	0.000256	ug/ml	5475	0.72							20220328_SR2_Omi_COM
AB01974202	01	Ainno_16251	Ainnocence	AIN1-34_AINNL0034	Lot# MB15NO1902	TC00821295	H012	8.1e-05	ug/ml	7100	-0.25							20220328_SR2_Omi_COM
AB01974202	01	Ainno_16251	Ainnocence	AIN1-34_AINNL0034	Lot# MB15NO1902	TC00821294	H012	8.1e-05	ug/ml	6625	2.12							20220328_SR2_Omi_COM
AB01974203	01	Ainno_16251	Ainnocence	AIN1-35_AINNL0035	Lot# MB15NO1903	TC00821295	I003	2.33	ug/ml	5500	-2.27	>2.33	Inactive	-0.53	2.05	0	20	20220328_SR2_Omi_COM
AB01974203	01	Ainno_16251	Ainnocence	AIN1-35_AINNL0035	Lot# MB15NO1903	TC00821294	I003	2.33	ug/ml	5750	1.06							20220328_SR2_Omi_COM
AB01974203	01	Ainno_16251	Ainnocence	AIN1-35_AINNL0035	Lot# MB15NO1903	TC00821295	I004	0.737	ug/ml	5025	-2.86							20220328_SR2_Omi_COM
AB01974203	01	Ainno_16251	Ainnocence	AIN1-35_AINNL0035	Lot# MB15NO1903	TC00821294	I004	0.737	ug/ml	8100	3.92							20220328_SR2_Omi_COM
AB01974203	01	Ainno_16251	Ainnocence	AIN1-35_AINNL0035	Lot# MB15NO1903	TC00821295	I005	0.233	ug/ml	5600	-2.14							20220328_SR2_Omi_COM
AB01974203	01	Ainno_16251	Ainnocence	AIN1-35_AINNL0035	Lot# MB15NO1903	TC00821294	I005	0.233	ug/ml	5875	1.21							20220328_SR2_Omi_COM
AB01974203	01	Ainno_16251	Ainnocence	AIN1-35_AINNL0035	Lot# MB15NO1903	TC00821295	I006	0.0737	ug/ml	7000	-0.37							20220328_SR2_Omi_COM
AB01974203	01	Ainno_16251	Ainnocence	AIN1-35_AINNL0035	Lot# MB15NO1903	TC00821294	I006	0.0737	ug/ml	2725	-2.62							20220328_SR2_Omi_COM
AB01974203	01	Ainno_16251	Ainnocence	AIN1-35_AINNL0035	Lot# MB15NO1903	TC00821295	I007	0.0233	ug/ml	8975	2.12							20220328_SR2_Omi_COM
AB01974203	01	Ainno_16251	Ainnocence	AIN1-35_AINNL0035	Lot# MB15NO1903	TC00821294	I007	0.0233	ug/ml	4975	0.12							20220328_SR2_Omi_COM
AB01974203	01	Ainno_16251	Ainnocence	AIN1-35_AINNL0035	Lot# MB15NO1903	TC00821295	I008	0.00737	ug/ml	6375	-1.16							20220328_SR2_Omi_COM
AB01974203	01	Ainno_16251	Ainnocence	AIN1-35_AINNL0035	Lot# MB15NO1903	TC00821294	I008	0.00737	ug/ml	7500	3.19							20220328_SR2_Omi_COM
AB01974203	01	Ainno_16251	Ainnocence	AIN1-35_AINNL0035	Lot# MB15NO1903	TC00821295	I009	0.00233	ug/ml	6150	-1.44							20220328_SR2_Omi_COM
AB01974203	01	Ainno_16251	Ainnocence	AIN1-35_AINNL0035	Lot# MB15NO1903	TC00821294	I009	0.00233	ug/ml	5350	0.57							20220328_SR2_Omi_COM
AB01974203	01	Ainno_16251	Ainnocence	AIN1-35_AINNL0035	Lot# MB15NO1903	TC00821295	I010	0.000737	ug/ml	6075	-1.54							20220328_SR2_Omi_COM
AB01974203	01	Ainno_16251	Ainnocence	AIN1-35_AINNL0035	Lot# MB15NO1903	TC00821294	I010	0.000737	ug/ml	6875	2.43							20220328_SR2_Omi_COM
AB01974203	01	Ainno_16251	Ainnocence	AIN1-35_AINNL0035	Lot# MB15NO1903	TC00821295	I011	0.000233	ug/ml	7725	0.54							20220328_SR2_Omi_COM
AB01974203	01	Ainno_16251	Ainnocence	AIN1-35_AINNL0035	Lot# MB15NO1903	TC00821294	I011	0.000233	ug/ml	6125	1.52							20220328_SR2_Omi_COM
AB01974203	01	Ainno_16251	Ainnocence	AIN1-35_AINNL0035	Lot# MB15NO1903	TC00821295	I012	7.4e-05	ug/ml	7175	-0.15							20220328_SR2_Omi_COM
AB01974203	01	Ainno_16251	Ainnocence	AIN1-35_AINNL0035	Lot# MB15NO1903	TC00821294	I012	7.4e-05	ug/ml	7575	3.28							20220328_SR2_Omi_COM
AB01974204	01	Ainno_16251	Ainnocence	AIN1-37_AINNL0037	Lot# MB15NO1904	TC00821295	J003	2.11	ug/ml	4625	-3.37	>2.11	Inactive	-0.18	1.82	0	20	20220328_SR2_Omi_COM
AB01974204	01	Ainno_16251	Ainnocence	AIN1-37_AINNL0037	Lot# MB15NO1904	TC00821294	J003	2.11	ug/ml	4100	-0.95							20220328_SR2_Omi_COM
AB01974204	01	Ainno_16251	Ainnocence	AIN1-37_AINNL0037	Lot# MB15NO1904	TC00821295	J004	0.668	ug/ml	7050	-0.31							20220328_SR2_Omi_COM
AB01974204	01	Ainno_16251	Ainnocence	AIN1-37_AINNL0037	Lot# MB15NO1904	TC00821294	J004	0.668	ug/ml	6100	1.48							20220328_SR2_Omi_COM
AB01974204	01	Ainno_16251	Ainnocence	AIN1-37_AINNL0037	Lot# MB15NO1904	TC00821295	J005	0.211	ug/ml	6875	-0.53							20220328_SR2_Omi_COM
AB01974204	01	Ainno_16251	Ainnocence	AIN1-37_AINNL0037	Lot# MB15NO1904	TC00821294	J005	0.211	ug/ml	4250	-0.77							20220328_SR2_Omi_COM
AB01974204	01	Ainno_16251	Ainnocence	AIN1-37_AINNL0037	Lot# MB15NO1904	TC00821295	J006	0.0668	ug/ml	6625	-0.85							20220328_SR2_Omi_COM
AB01974204	01	Ainno_16251	Ainnocence	AIN1-37_AINNL0037	Lot# MB15NO1904	TC00821294	J006	0.0668	ug/ml	7600	3.31							20220328_SR2_Omi_COM
AB01974204	01	Ainno_16251	Ainnocence	AIN1-37_AINNL0037	Lot# MB15NO1904	TC00821295	J007	0.0211	ug/ml	7650	0.45							20220328_SR2_Omi_COM
AB01974204	01	Ainno_16251	Ainnocence	AIN1-37_AINNL0037	Lot# MB15NO1904	TC00821294	J007	0.0211	ug/ml	5875	1.21							20220328_SR2_Omi_COM
AB01974204	01	Ainno_16251	Ainnocence	AIN1-37_AINNL0037	Lot# MB15NO1904	TC00821295	J008	0.00668	ug/ml	9150	2.34							20220328_SR2_Omi_COM
AB01974204	01	Ainno_16251	Ainnocence	AIN1-37_AINNL0037	Lot# MB15NO1904	TC00821294	J008	0.00668	ug/ml	6475	1.94							20220328_SR2_Omi_COM
AB01974204	01	Ainno_16251	Ainnocence	AIN1-37_AINNL0037	Lot# MB15NO1904	TC00821295	J009	0.00211	ug/ml	10625	4.2							20220328_SR2_Omi_COM
AB01974204	01	Ainno_16251	Ainnocence	AIN1-37_AINNL0037	Lot# MB15NO1904	TC00821294	J009	0.00211	ug/ml	5450	0.69							20220328_SR2_Omi_COM
AB01974204	01	Ainno_16251	Ainnocence	AIN1-37_AINNL0037	Lot# MB15NO1904	TC00821295	J010	0.000668	ug/ml	7350	0.07							20220328_SR2_Omi_COM
AB01974204	01	Ainno_16251	Ainnocence	AIN1-37_AINNL0037	Lot# MB15NO1904	TC00821294	J010	0.000668	ug/ml	5425	0.66							20220328_SR2_Omi_COM
AB01974204	01	Ainno_16251	Ainnocence	AIN1-37_AINNL0037	Lot# MB15NO1904	TC00821295	J011	0.000211	ug/ml	6800	-0.62							20220328_SR2_Omi_COM
AB01974204	01	Ainno_16251	Ainnocence	AIN1-37_AINNL0037	Lot# MB15NO1904	TC00821294	J011	0.000211	ug/ml	7350	3.01							20220328_SR2_Omi_COM
AB01974204	01	Ainno_16251	Ainnocence	AIN1-37_AINNL0037	Lot# MB15NO1904	TC00821295	J012	6.7e-05	ug/ml	7075	-0.28							20220328_SR2_Omi_COM
AB01974204	01	Ainno_16251	Ainnocence	AIN1-37_AINNL0037	Lot# MB15NO1904	TC00821294	J012	6.7e-05	ug/ml	4225	-0.8							20220328_SR2_Omi_COM
AB01974205	01	Ainno_16251	Ainnocence	AIN1-43_AINNL0043	Lot# MB15NO4143	TC00821295	K003	12.33	ug/ml	5300	-2.52	>12.33	Inactive	0.29	3.14	>9999	20	20220328_SR2_Omi_COM
AB01974205	01	Ainno_16251	Ainnocence	AIN1-43_AINNL0043	Lot# MB15NO4143	TC00821294	K003	12.33	ug/ml	8350	4.22							20220328_SR2_Omi_COM
AB01974205	01	Ainno_16251	Ainnocence	AIN1-43_AINNL0043	Lot# MB15NO4143	TC00821295	K004	3.9	ug/ml	6600	-0.88							20220328_SR2_Omi_COM
AB01974205	01	Ainno_16251	Ainnocence	AIN1-43_AINNL0043	Lot# MB15NO4143	TC00821294	K004	3.9	ug/ml	10325	6.63							20220328_SR2_Omi_COM
AB01974205	01	Ainno_16251	Ainnocence	AIN1-43_AINNL0043	Lot# MB15NO4143	TC00821295	K005	1.23	ug/ml	7750	0.57							20220328_SR2_Omi_COM
AB01974205	01	Ainno_16251	Ainnocence	AIN1-43_AINNL0043	Lot# MB15NO4143	TC00821294	K005	1.23	ug/ml	7750	3.49							20220328_SR2_Omi_COM
AB01974205	01	Ainno_16251	Ainnocence	AIN1-43_AINNL0043	Lot# MB15NO4143	TC00821295	K006	0.389	ug/ml	6550	-0.94							20220328_SR2_Omi_COM
AB01974205	01	Ainno_16251	Ainnocence	AIN1-43_AINNL0043	Lot# MB15NO4143	TC00821294	K006	0.389	ug/ml	2925	-2.38							20220328_SR2_Omi_COM
AB01974205	01	Ainno_16251	Ainnocence	AIN1-43_AINNL0043	Lot# MB15NO4143	TC00821295	K007	0.123	ug/ml	8575	1.62							20220328_SR2_Omi_COM
AB01974205	01	Ainno_16251	Ainnocence	AIN1-43_AINNL0043	Lot# MB15NO4143	TC00821294	K007	0.123	ug/ml	3425	-1.77							20220328_SR2_Omi_COM
AB01974205	01	Ainno_16251	Ainnocence	AIN1-43_AINNL0043	Lot# MB15NO4143	TC00821295	K008	0.0389	ug/ml	5525	-2.23							20220328_SR2_Omi_COM
AB01974205	01	Ainno_16251	Ainnocence	AIN1-43_AINNL0043	Lot# MB15NO4143	TC00821294	K008	0.0389	ug/ml	4050	-1.01							20220328_SR2_Omi_COM
AB01974205	01	Ainno_16251	Ainnocence	AIN1-43_AINNL0043	Lot# MB15NO4143	TC00821295	K009	0.0123	ug/ml	5225	-2.61							20220328_SR2_Omi_COM
AB01974205	01	Ainno_16251	Ainnocence	AIN1-43_AINNL0043	Lot# MB15NO4143	TC00821294	K009	0.0123	ug/ml	8475	4.38							20220328_SR2_Omi_COM
AB01974205	01	Ainno_16251	Ainnocence	AIN1-43_AINNL0043	Lot# MB15NO4143	TC00821295	K010	0.00389	ug/ml	12075	6.03							20220328_SR2_Omi_COM
AB01974205	01	Ainno_16251	Ainnocence	AIN1-43_AINNL0043	Lot# MB15NO4143	TC00821294	K010	0.00389	ug/ml	6075	1.45							20220328_SR2_Omi_COM
AB01974205	01	Ainno_16251	Ainnocence	AIN1-43_AINNL0043	Lot# MB15NO4143	TC00821295	K011	0.00123	ug/ml	5625	-2.11							20220328_SR2_Omi_COM
AB01974205	01	Ainno_16251	Ainnocence	AIN1-43_AINNL0043	Lot# MB15NO4143	TC00821294	K011	0.00123	ug/ml	5575	0.85							20220328_SR2_Omi_COM
AB01974205	01	Ainno_16251	Ainnocence	AIN1-43_AINNL0043	Lot# MB15NO4143	TC00821295	K012	0.000389	ug/ml	5175	-2.68							20220328_SR2_Omi_COM
AB01974205	01	Ainno_16251	Ainnocence	AIN1-43_AINNL0043	Lot# MB15NO4143	TC00821294	K012	0.000389	ug/ml	7750	3.49							20220328_SR2_Omi_COM
AB01974206	01	Ainno_16251	Ainnocence	AIN1-44_AINNL0044	Lot# MB15NO4144	TC00821295	L003	11.44	ug/ml	10750	4.36	>11.44	Inactive	0.97	2.12	>9999	20	20220328_SR2_Omi_COM
AB01974206	01	Ainno_16251	Ainnocence	AIN1-44_AINNL0044	Lot# MB15NO4144	TC00821294	L003	11.44	ug/ml	4775	-0.13							20220328_SR2_Omi_COM
AB01974206	01	Ainno_16251	Ainnocence	AIN1-44_AINNL0044	Lot# MB15NO4144	TC00821295	L004	3.62	ug/ml	7750	0.57							20220328_SR2_Omi_COM
AB01974206	01	Ainno_16251	Ainnocence	AIN1-44_AINNL0044	Lot# MB15NO4144	TC00821294	L004	3.62	ug/ml	4550	-0.4							20220328_SR2_Omi_COM
AB01974206	01	Ainno_16251	Ainnocence	AIN1-44_AINNL0044	Lot# MB15NO4144	TC00821295	L005	1.15	ug/ml	8250	1.21							20220328_SR2_Omi_COM
AB01974206	01	Ainno_16251	Ainnocence	AIN1-44_AINNL0044	Lot# MB15NO4144	TC00821294	L005	1.15	ug/ml	4075	-0.98							20220328_SR2_Omi_COM
AB01974206	01	Ainno_16251	Ainnocence	AIN1-44_AINNL0044	Lot# MB15NO4144	TC00821295	L006	0.364	ug/ml	5600	-2.14							20220328_SR2_Omi_COM
AB01974206	01	Ainno_16251	Ainnocence	AIN1-44_AINNL0044	Lot# MB15NO4144	TC00821294	L006	0.364	ug/ml	7750	3.49							20220328_SR2_Omi_COM
AB01974206	01	Ainno_16251	Ainnocence	AIN1-44_AINNL0044	Lot# MB15NO4144	TC00821295	L007	0.115	ug/ml	6275	-1.29							20220328_SR2_Omi_COM
AB01974206	01	Ainno_16251	Ainnocence	AIN1-44_AINNL0044	Lot# MB15NO4144	TC00821294	L007	0.115	ug/ml	4050	-1.01							20220328_SR2_Omi_COM
AB01974206	01	Ainno_16251	Ainnocence	AIN1-44_AINNL0044	Lot# MB15NO4144	TC00821295	L008	0.0364	ug/ml	7625	0.42							20220328_SR2_Omi_COM
AB01974206	01	Ainno_16251	Ainnocence	AIN1-44_AINNL0044	Lot# MB15NO4144	TC00821294	L008	0.0364	ug/ml	4300	-0.71							20220328_SR2_Omi_COM
AB01974206	01	Ainno_16251	Ainnocence	AIN1-44_AINNL0044	Lot# MB15NO4144	TC00821295	L009	0.0115	ug/ml	9625	2.94							20220328_SR2_Omi_COM
AB01974206	01	Ainno_16251	Ainnocence	AIN1-44_AINNL0044	Lot# MB15NO4144	TC00821294	L009	0.0115	ug/ml	7775	3.52							20220328_SR2_Omi_COM
AB01974206	01	Ainno_16251	Ainnocence	AIN1-44_AINNL0044	Lot# MB15NO4144	TC00821295	L010	0.00364	ug/ml	7250	-0.06							20220328_SR2_Omi_COM
AB01974206	01	Ainno_16251	Ainnocence	AIN1-44_AINNL0044	Lot# MB15NO4144	TC00821294	L010	0.00364	ug/ml	7875	3.65							20220328_SR2_Omi_COM
AB01974206	01	Ainno_16251	Ainnocence	AIN1-44_AINNL0044	Lot# MB15NO4144	TC00821295	L011	0.00115	ug/ml	6500	-1							20220328_SR2_Omi_COM
AB01974206	01	Ainno_16251	Ainnocence	AIN1-44_AINNL0044	Lot# MB15NO4144	TC00821294	L011	0.00115	ug/ml	5750	1.06							20220328_SR2_Omi_COM
AB01974206	01	Ainno_16251	Ainnocence	AIN1-44_AINNL0044	Lot# MB15NO4144	TC00821295	L012	0.000364	ug/ml	6425	-1.1							20220328_SR2_Omi_COM
AB01974206	01	Ainno_16251	Ainnocence	AIN1-44_AINNL0044	Lot# MB15NO4144	TC00821294	L012	0.000364	ug/ml	5850	1.18							20220328_SR2_Omi_COM
AB01974207	01	Ainno_16251	Ainnocence	AIN1-45_AINNL0045	Lot# MB15NO4145	TC00821295	M003	11.44	ug/ml	5500	-2.27	>11.44	Inactive	-4.55	1.41	0.01	20	20220328_SR2_Omi_COM
AB01974207	01	Ainno_16251	Ainnocence	AIN1-45_AINNL0045	Lot# MB15NO4145	TC00821294	M003	11.44	ug/ml	3750	-1.38							20220328_SR2_Omi_COM
AB01974207	01	Ainno_16251	Ainnocence	AIN1-45_AINNL0045	Lot# MB15NO4145	TC00821295	M004	3.62	ug/ml	7800	0.64							20220328_SR2_Omi_COM
AB01974207	01	Ainno_16251	Ainnocence	AIN1-45_AINNL0045	Lot# MB15NO4145	TC00821294	M004	3.62	ug/ml	5450	0.69							20220328_SR2_Omi_COM
AB01974207	01	Ainno_16251	Ainnocence	AIN1-45_AINNL0045	Lot# MB15NO4145	TC00821295	M005	1.15	ug/ml	8725	1.81							20220328_SR2_Omi_COM
AB01974207	01	Ainno_16251	Ainnocence	AIN1-45_AINNL0045	Lot# MB15NO4145	TC00821294	M005	1.15	ug/ml	4550	-0.4							20220328_SR2_Omi_COM
AB01974207	01	Ainno_16251	Ainnocence	AIN1-45_AINNL0045	Lot# MB15NO4145	TC00821295	M006	0.364	ug/ml	8850	1.96							20220328_SR2_Omi_COM
AB01974207	01	Ainno_16251	Ainnocence	AIN1-45_AINNL0045	Lot# MB15NO4145	TC00821294	M006	0.364	ug/ml	4950	0.08							20220328_SR2_Omi_COM
AB01974207	01	Ainno_16251	Ainnocence	AIN1-45_AINNL0045	Lot# MB15NO4145	TC00821295	M007	0.115	ug/ml	5700	-2.01							20220328_SR2_Omi_COM
AB01974207	01	Ainno_16251	Ainnocence	AIN1-45_AINNL0045	Lot# MB15NO4145	TC00821294	M007	0.115	ug/ml	3650	-1.5							20220328_SR2_Omi_COM
AB01974207	01	Ainno_16251	Ainnocence	AIN1-45_AINNL0045	Lot# MB15NO4145	TC00821295	M008	0.0364	ug/ml	8800	1.9							20220328_SR2_Omi_COM
AB01974207	01	Ainno_16251	Ainnocence	AIN1-45_AINNL0045	Lot# MB15NO4145	TC00821294	M008	0.0364	ug/ml	5200	0.39							20220328_SR2_Omi_COM
AB01974207	01	Ainno_16251	Ainnocence	AIN1-45_AINNL0045	Lot# MB15NO4145	TC00821295	M009	0.0115	ug/ml	5225	-2.61							20220328_SR2_Omi_COM
AB01974207	01	Ainno_16251	Ainnocence	AIN1-45_AINNL0045	Lot# MB15NO4145	TC00821294	M009	0.0115	ug/ml	3650	-1.5							20220328_SR2_Omi_COM
AB01974207	01	Ainno_16251	Ainnocence	AIN1-45_AINNL0045	Lot# MB15NO4145	TC00821295	M010	0.00364	ug/ml	6775	-0.66							20220328_SR2_Omi_COM
AB01974207	01	Ainno_16251	Ainnocence	AIN1-45_AINNL0045	Lot# MB15NO4145	TC00821294	M010	0.00364	ug/ml	4625	-0.31							20220328_SR2_Omi_COM
AB01974207	01	Ainno_16251	Ainnocence	AIN1-45_AINNL0045	Lot# MB15NO4145	TC00821295	M011	0.00115	ug/ml	6800	-0.62							20220328_SR2_Omi_COM
AB01974207	01	Ainno_16251	Ainnocence	AIN1-45_AINNL0045	Lot# MB15NO4145	TC00821294	M011	0.00115	ug/ml	5050	0.21							20220328_SR2_Omi_COM
AB01974207	01	Ainno_16251	Ainnocence	AIN1-45_AINNL0045	Lot# MB15NO4145	TC00821295	M012	0.000364	ug/ml	8250	1.21							20220328_SR2_Omi_COM
AB01974207	01	Ainno_16251	Ainnocence	AIN1-45_AINNL0045	Lot# MB15NO4145	TC00821294	M012	0.000364	ug/ml	5100	0.27							20220328_SR2_Omi_COM
AB01974208	01	Ainno_16251	Ainnocence	AIN1-46_AINNL0046	Lot# MB15NO4146	TC00821295	N003	13.11	ug/ml	10500	4.05	>13.11	Inactive	4.2	2.07	107.16	20	20220328_SR2_Omi_COM
AB01974208	01	Ainno_16251	Ainnocence	AIN1-46_AINNL0046	Lot# MB15NO4146	TC00821294	N003	13.11	ug/ml	10400	6.72							20220328_SR2_Omi_COM
AB01974208	01	Ainno_16251	Ainnocence	AIN1-46_AINNL0046	Lot# MB15NO4146	TC00821295	N004	4.15	ug/ml	4825	-3.12							20220328_SR2_Omi_COM
AB01974208	01	Ainno_16251	Ainnocence	AIN1-46_AINNL0046	Lot# MB15NO4146	TC00821294	N004	4.15	ug/ml	4875	-0.01							20220328_SR2_Omi_COM
AB01974208	01	Ainno_16251	Ainnocence	AIN1-46_AINNL0046	Lot# MB15NO4146	TC00821295	N005	1.31	ug/ml	4600	-3.4							20220328_SR2_Omi_COM
AB01974208	01	Ainno_16251	Ainnocence	AIN1-46_AINNL0046	Lot# MB15NO4146	TC00821294	N005	1.31	ug/ml	6725	2.25							20220328_SR2_Omi_COM
AB01974208	01	Ainno_16251	Ainnocence	AIN1-46_AINNL0046	Lot# MB15NO4146	TC00821295	N006	0.415	ug/ml	7050	-0.31							20220328_SR2_Omi_COM
AB01974208	01	Ainno_16251	Ainnocence	AIN1-46_AINNL0046	Lot# MB15NO4146	TC00821294	N006	0.415	ug/ml	5975	1.33							20220328_SR2_Omi_COM
AB01974208	01	Ainno_16251	Ainnocence	AIN1-46_AINNL0046	Lot# MB15NO4146	TC00821295	N007	0.131	ug/ml	7550	0.32							20220328_SR2_Omi_COM
AB01974208	01	Ainno_16251	Ainnocence	AIN1-46_AINNL0046	Lot# MB15NO4146	TC00821294	N007	0.131	ug/ml	5800	1.12							20220328_SR2_Omi_COM
AB01974208	01	Ainno_16251	Ainnocence	AIN1-46_AINNL0046	Lot# MB15NO4146	TC00821295	N008	0.0415	ug/ml	5300	-2.52							20220328_SR2_Omi_COM
AB01974208	01	Ainno_16251	Ainnocence	AIN1-46_AINNL0046	Lot# MB15NO4146	TC00821294	N008	0.0415	ug/ml	4025	-1.04							20220328_SR2_Omi_COM
AB01974208	01	Ainno_16251	Ainnocence	AIN1-46_AINNL0046	Lot# MB15NO4146	TC00821295	N009	0.0131	ug/ml	4850	-3.09							20220328_SR2_Omi_COM
AB01974208	01	Ainno_16251	Ainnocence	AIN1-46_AINNL0046	Lot# MB15NO4146	TC00821294	N009	0.0131	ug/ml	7450	3.13							20220328_SR2_Omi_COM
AB01974208	01	Ainno_16251	Ainnocence	AIN1-46_AINNL0046	Lot# MB15NO4146	TC00821295	N010	0.00415	ug/ml	6575	-0.91							20220328_SR2_Omi_COM
AB01974208	01	Ainno_16251	Ainnocence	AIN1-46_AINNL0046	Lot# MB15NO4146	TC00821294	N010	0.00415	ug/ml	3600	-1.56							20220328_SR2_Omi_COM
AB01974208	01	Ainno_16251	Ainnocence	AIN1-46_AINNL0046	Lot# MB15NO4146	TC00821295	N011	0.00131	ug/ml	5125	-2.74							20220328_SR2_Omi_COM
AB01974208	01	Ainno_16251	Ainnocence	AIN1-46_AINNL0046	Lot# MB15NO4146	TC00821294	N011	0.00131	ug/ml	4425	-0.55							20220328_SR2_Omi_COM
AB01974208	01	Ainno_16251	Ainnocence	AIN1-46_AINNL0046	Lot# MB15NO4146	TC00821295	N012	0.000415	ug/ml	5575	-2.17							20220328_SR2_Omi_COM
AB01974208	01	Ainno_16251	Ainnocence	AIN1-46_AINNL0046	Lot# MB15NO4146	TC00821294	N012	0.000415	ug/ml	5650	0.94							20220328_SR2_Omi_COM
AB01974209	01	Ainno_16251	Ainnocence	AIN1-47_AINNL0047	Lot# MB15NO4147	TC00821295	O003	24.78	ug/ml	4750	-3.21	>24.78	Inactive	-5.51	2.71	0.02	20	20220328_SR2_Omi_COM
AB01974209	01	Ainno_16251	Ainnocence	AIN1-47_AINNL0047	Lot# MB15NO4147	TC00821294	O003	24.78	ug/ml	4375	-0.62							20220328_SR2_Omi_COM
AB01974209	01	Ainno_16251	Ainnocence	AIN1-47_AINNL0047	Lot# MB15NO4147	TC00821295	O004	7.84	ug/ml	3375	-4.95							20220328_SR2_Omi_COM
AB01974209	01	Ainno_16251	Ainnocence	AIN1-47_AINNL0047	Lot# MB15NO4147	TC00821294	O004	7.84	ug/ml	4200	-0.83							20220328_SR2_Omi_COM
AB01974209	01	Ainno_16251	Ainnocence	AIN1-47_AINNL0047	Lot# MB15NO4147	TC00821295	O005	2.48	ug/ml	5125	-2.74							20220328_SR2_Omi_COM
AB01974209	01	Ainno_16251	Ainnocence	AIN1-47_AINNL0047	Lot# MB15NO4147	TC00821294	O005	2.48	ug/ml	4500	-0.46							20220328_SR2_Omi_COM
AB01974209	01	Ainno_16251	Ainnocence	AIN1-47_AINNL0047	Lot# MB15NO4147	TC00821295	O006	0.785	ug/ml	5325	-2.49							20220328_SR2_Omi_COM
AB01974209	01	Ainno_16251	Ainnocence	AIN1-47_AINNL0047	Lot# MB15NO4147	TC00821294	O006	0.785	ug/ml	3525	-1.65							20220328_SR2_Omi_COM
AB01974209	01	Ainno_16251	Ainnocence	AIN1-47_AINNL0047	Lot# MB15NO4147	TC00821295	O007	0.248	ug/ml	6950	-0.43							20220328_SR2_Omi_COM
AB01974209	01	Ainno_16251	Ainnocence	AIN1-47_AINNL0047	Lot# MB15NO4147	TC00821294	O007	0.248	ug/ml	3500	-1.68							20220328_SR2_Omi_COM
AB01974209	01	Ainno_16251	Ainnocence	AIN1-47_AINNL0047	Lot# MB15NO4147	TC00821295	O008	0.0785	ug/ml	6425	-1.1							20220328_SR2_Omi_COM
AB01974209	01	Ainno_16251	Ainnocence	AIN1-47_AINNL0047	Lot# MB15NO4147	TC00821294	O008	0.0785	ug/ml	4250	-0.77							20220328_SR2_Omi_COM
AB01974209	01	Ainno_16251	Ainnocence	AIN1-47_AINNL0047	Lot# MB15NO4147	TC00821295	O009	0.0248	ug/ml	8600	1.65							20220328_SR2_Omi_COM
AB01974209	01	Ainno_16251	Ainnocence	AIN1-47_AINNL0047	Lot# MB15NO4147	TC00821294	O009	0.0248	ug/ml	3875	-1.22							20220328_SR2_Omi_COM
AB01974209	01	Ainno_16251	Ainnocence	AIN1-47_AINNL0047	Lot# MB15NO4147	TC00821295	O010	0.00785	ug/ml	4550	-3.46							20220328_SR2_Omi_COM
AB01974209	01	Ainno_16251	Ainnocence	AIN1-47_AINNL0047	Lot# MB15NO4147	TC00821294	O010	0.00785	ug/ml	7300	2.95							20220328_SR2_Omi_COM
AB01974209	01	Ainno_16251	Ainnocence	AIN1-47_AINNL0047	Lot# MB15NO4147	TC00821295	O011	0.00248	ug/ml	4850	-3.09							20220328_SR2_Omi_COM
AB01974209	01	Ainno_16251	Ainnocence	AIN1-47_AINNL0047	Lot# MB15NO4147	TC00821294	O011	0.00248	ug/ml	6200	1.61							20220328_SR2_Omi_COM
AB01974209	01	Ainno_16251	Ainnocence	AIN1-47_AINNL0047	Lot# MB15NO4147	TC00821295	O012	0.000785	ug/ml	5400	-2.39							20220328_SR2_Omi_COM
AB01974209	01	Ainno_16251	Ainnocence	AIN1-47_AINNL0047	Lot# MB15NO4147	TC00821294	O012	0.000785	ug/ml	10075	6.32							20220328_SR2_Omi_COM
AB01974210	01	Ainno_16251	Ainnocence	AIN1-48_AINNL0048	Lot# MB15NO4148	TC00821295	P003	11	ug/ml	7350	0.07	>11.00	Inactive	-0.19	3.08	0	20	20220328_SR2_Omi_COM
AB01974210	01	Ainno_16251	Ainnocence	AIN1-48_AINNL0048	Lot# MB15NO4148	TC00821294	P003	11	ug/ml	6300	1.73							20220328_SR2_Omi_COM
AB01974210	01	Ainno_16251	Ainnocence	AIN1-48_AINNL0048	Lot# MB15NO4148	TC00821295	P004	3.48	ug/ml	4075	-4.06							20220328_SR2_Omi_COM
AB01974210	01	Ainno_16251	Ainnocence	AIN1-48_AINNL0048	Lot# MB15NO4148	TC00821294	P004	3.48	ug/ml	5500	0.75							20220328_SR2_Omi_COM
AB01974210	01	Ainno_16251	Ainnocence	AIN1-48_AINNL0048	Lot# MB15NO4148	TC00821295	P005	1.1	ug/ml	7825	0.67							20220328_SR2_Omi_COM
AB01974210	01	Ainno_16251	Ainnocence	AIN1-48_AINNL0048	Lot# MB15NO4148	TC00821294	P005	1.1	ug/ml	8600	4.53							20220328_SR2_Omi_COM
AB01974210	01	Ainno_16251	Ainnocence	AIN1-48_AINNL0048	Lot# MB15NO4148	TC00821295	P006	0.348	ug/ml	4375	-3.69							20220328_SR2_Omi_COM
AB01974210	01	Ainno_16251	Ainnocence	AIN1-48_AINNL0048	Lot# MB15NO4148	TC00821294	P006	0.348	ug/ml	3950	-1.13							20220328_SR2_Omi_COM
AB01974210	01	Ainno_16251	Ainnocence	AIN1-48_AINNL0048	Lot# MB15NO4148	TC00821295	P007	0.11	ug/ml	8350	1.33							20220328_SR2_Omi_COM
AB01974210	01	Ainno_16251	Ainnocence	AIN1-48_AINNL0048	Lot# MB15NO4148	TC00821294	P007	0.11	ug/ml	6425	1.88							20220328_SR2_Omi_COM
AB01974210	01	Ainno_16251	Ainnocence	AIN1-48_AINNL0048	Lot# MB15NO4148	TC00821295	P008	0.0348	ug/ml	10075	3.51							20220328_SR2_Omi_COM
AB01974210	01	Ainno_16251	Ainnocence	AIN1-48_AINNL0048	Lot# MB15NO4148	TC00821294	P008	0.0348	ug/ml	12650	9.46							20220328_SR2_Omi_COM
AB01974210	01	Ainno_16251	Ainnocence	AIN1-48_AINNL0048	Lot# MB15NO4148	TC00821295	P009	0.011	ug/ml	10250	3.73							20220328_SR2_Omi_COM
AB01974210	01	Ainno_16251	Ainnocence	AIN1-48_AINNL0048	Lot# MB15NO4148	TC00821294	P009	0.011	ug/ml	5025	0.18							20220328_SR2_Omi_COM
AB01974210	01	Ainno_16251	Ainnocence	AIN1-48_AINNL0048	Lot# MB15NO4148	TC00821295	P010	0.00348	ug/ml	7175	-0.15							20220328_SR2_Omi_COM
AB01974210	01	Ainno_16251	Ainnocence	AIN1-48_AINNL0048	Lot# MB15NO4148	TC00821294	P010	0.00348	ug/ml	5475	0.72							20220328_SR2_Omi_COM
AB01974210	01	Ainno_16251	Ainnocence	AIN1-48_AINNL0048	Lot# MB15NO4148	TC00821295	P011	0.0011	ug/ml	7350	0.07							20220328_SR2_Omi_COM
AB01974210	01	Ainno_16251	Ainnocence	AIN1-48_AINNL0048	Lot# MB15NO4148	TC00821294	P011	0.0011	ug/ml	8250	4.1							20220328_SR2_Omi_COM
AB01974210	01	Ainno_16251	Ainnocence	AIN1-48_AINNL0048	Lot# MB15NO4148	TC00821295	P012	0.000348	ug/ml	9850	3.23							20220328_SR2_Omi_COM
AB01974210	01	Ainno_16251	Ainnocence	AIN1-48_AINNL0048	Lot# MB15NO4148	TC00821294	P012	0.000348	ug/ml	4025	-1.04							20220328_SR2_Omi_COM
AB01974587	01	Ainno_16335	Ainnocence	22AIN4-1		TC00821297	A003	11	ug/ml	8400	3.35							20220328_SR2_Omi_COM
AB01974587	01	Ainno_16335	Ainnocence	22AIN4-1		TC00821297	A004	3.48	ug/ml	5850	0.21							20220328_SR2_Omi_COM
AB01974587	01	Ainno_16335	Ainnocence	22AIN4-1		TC00821297	A005	1.1	ug/ml	8575	3.56							20220328_SR2_Omi_COM
AB01974587	01	Ainno_16335	Ainnocence	22AIN4-1		TC00821297	A006	0.348	ug/ml	5875	0.24							20220328_SR2_Omi_COM
AB01974587	01	Ainno_16335	Ainnocence	22AIN4-1		TC00821297	A007	0.11	ug/ml	4675	-1.23							20220328_SR2_Omi_COM
AB01974587	01	Ainno_16335	Ainnocence	22AIN4-1		TC00821297	A008	0.0348	ug/ml	4500	-1.45							20220328_SR2_Omi_COM
AB01974587	01	Ainno_16335	Ainnocence	22AIN4-1		TC00821297	A009	0.011	ug/ml	5850	0.21							20220328_SR2_Omi_COM
AB01974587	01	Ainno_16335	Ainnocence	22AIN4-1		TC00821297	A010	0.00348	ug/ml	5100	-0.71							20220328_SR2_Omi_COM
AB01974587	01	Ainno_16335	Ainnocence	22AIN4-1		TC00821297	A011	0.0011	ug/ml	8725	3.75							20220328_SR2_Omi_COM
AB01974587	01	Ainno_16335	Ainnocence	22AIN4-1		TC00821297	A012	0.000348	ug/ml	4575	-1.36							20220328_SR2_Omi_COM
AB01974603	01	Ainno_16335	Ainnocence	22AIN4-17		TC00821297	A013	11.44	ug/ml	3350	-2.86							20220328_SR2_Omi_COM
AB01974603	01	Ainno_16335	Ainnocence	22AIN4-17		TC00821297	A014	3.62	ug/ml	7475	2.21							20220328_SR2_Omi_COM
AB01974603	01	Ainno_16335	Ainnocence	22AIN4-17		TC00821297	A015	1.15	ug/ml	4275	-1.72							20220328_SR2_Omi_COM
AB01974603	01	Ainno_16335	Ainnocence	22AIN4-17		TC00821297	A016	0.364	ug/ml	4550	-1.39							20220328_SR2_Omi_COM
AB01974603	01	Ainno_16335	Ainnocence	22AIN4-17		TC00821297	A017	0.115	ug/ml	7575	2.33							20220328_SR2_Omi_COM
AB01974603	01	Ainno_16335	Ainnocence	22AIN4-17		TC00821297	A018	0.0364	ug/ml	4775	-1.11							20220328_SR2_Omi_COM
AB01974603	01	Ainno_16335	Ainnocence	22AIN4-17		TC00821297	A019	0.0115	ug/ml	3975	-2.09							20220328_SR2_Omi_COM
AB01974603	01	Ainno_16335	Ainnocence	22AIN4-17		TC00821297	A020	0.00364	ug/ml	4500	-1.45							20220328_SR2_Omi_COM
AB01974603	01	Ainno_16335	Ainnocence	22AIN4-17		TC00821297	A021	0.00115	ug/ml	4150	-1.88							20220328_SR2_Omi_COM
AB01974603	01	Ainno_16335	Ainnocence	22AIN4-17		TC00821297	A022	0.000364	ug/ml	5725	0.06							20220328_SR2_Omi_COM
AB01974588	01	Ainno_16335	Ainnocence	22AIN4-2		TC00821297	B003	12.11	ug/ml	7825	2.64							20220328_SR2_Omi_COM
AB01974588	01	Ainno_16335	Ainnocence	22AIN4-2		TC00821297	B004	3.83	ug/ml	6200	0.64							20220328_SR2_Omi_COM
AB01974588	01	Ainno_16335	Ainnocence	22AIN4-2		TC00821297	B005	1.21	ug/ml	4375	-1.6							20220328_SR2_Omi_COM
AB01974588	01	Ainno_16335	Ainnocence	22AIN4-2		TC00821297	B006	0.383	ug/ml	6750	1.32							20220328_SR2_Omi_COM
AB01974588	01	Ainno_16335	Ainnocence	22AIN4-2		TC00821297	B007	0.121	ug/ml	4825	-1.05							20220328_SR2_Omi_COM
AB01974588	01	Ainno_16335	Ainnocence	22AIN4-2		TC00821297	B008	0.0383	ug/ml	5700	0.03							20220328_SR2_Omi_COM
AB01974588	01	Ainno_16335	Ainnocence	22AIN4-2		TC00821297	B009	0.0121	ug/ml	3625	-2.52							20220328_SR2_Omi_COM
AB01974588	01	Ainno_16335	Ainnocence	22AIN4-2		TC00821297	B010	0.00383	ug/ml	4750	-1.14							20220328_SR2_Omi_COM
AB01974588	01	Ainno_16335	Ainnocence	22AIN4-2		TC00821297	B011	0.00121	ug/ml	5350	-0.4							20220328_SR2_Omi_COM
AB01974588	01	Ainno_16335	Ainnocence	22AIN4-2		TC00821297	B012	0.000383	ug/ml	5300	-0.46							20220328_SR2_Omi_COM
AB01974604	01	Ainno_16335	Ainnocence	22AIN4-18		TC00821297	B013	11.56	ug/ml	5875	0.24							20220328_SR2_Omi_COM
AB01974604	01	Ainno_16335	Ainnocence	22AIN4-18		TC00821297	B014	3.66	ug/ml	3925	-2.15							20220328_SR2_Omi_COM
AB01974604	01	Ainno_16335	Ainnocence	22AIN4-18		TC00821297	B015	1.16	ug/ml	7250	1.93							20220328_SR2_Omi_COM
AB01974604	01	Ainno_16335	Ainnocence	22AIN4-18		TC00821297	B016	0.367	ug/ml	4425	-1.54							20220328_SR2_Omi_COM
AB01974604	01	Ainno_16335	Ainnocence	22AIN4-18		TC00821297	B017	0.116	ug/ml	4650	-1.26							20220328_SR2_Omi_COM
AB01974604	01	Ainno_16335	Ainnocence	22AIN4-18		TC00821297	B018	0.0367	ug/ml	6325	0.8							20220328_SR2_Omi_COM
AB01974604	01	Ainno_16335	Ainnocence	22AIN4-18		TC00821297	B019	0.0116	ug/ml	6000	0.4							20220328_SR2_Omi_COM
AB01974604	01	Ainno_16335	Ainnocence	22AIN4-18		TC00821297	B020	0.00367	ug/ml	5500	-0.22							20220328_SR2_Omi_COM
AB01974604	01	Ainno_16335	Ainnocence	22AIN4-18		TC00821297	B021	0.00116	ug/ml	10275	5.65							20220328_SR2_Omi_COM
AB01974604	01	Ainno_16335	Ainnocence	22AIN4-18		TC00821297	B022	0.000367	ug/ml	6475	0.98							20220328_SR2_Omi_COM
AB01974589	01	Ainno_16335	Ainnocence	22AIN4-3		TC00821297	C003	10.89	ug/ml	6725	1.29							20220328_SR2_Omi_COM
AB01974589	01	Ainno_16335	Ainnocence	22AIN4-3		TC00821297	C004	3.45	ug/ml	4550	-1.39							20220328_SR2_Omi_COM
AB01974589	01	Ainno_16335	Ainnocence	22AIN4-3		TC00821297	C005	1.09	ug/ml	5200	-0.59							20220328_SR2_Omi_COM
AB01974589	01	Ainno_16335	Ainnocence	22AIN4-3		TC00821297	C006	0.345	ug/ml	4375	-1.6							20220328_SR2_Omi_COM
AB01974589	01	Ainno_16335	Ainnocence	22AIN4-3		TC00821297	C007	0.109	ug/ml	6100	0.52							20220328_SR2_Omi_COM
AB01974589	01	Ainno_16335	Ainnocence	22AIN4-3		TC00821297	C008	0.0345	ug/ml	6250	0.7							20220328_SR2_Omi_COM
AB01974589	01	Ainno_16335	Ainnocence	22AIN4-3		TC00821297	C009	0.0109	ug/ml	6450	0.95							20220328_SR2_Omi_COM
AB01974589	01	Ainno_16335	Ainnocence	22AIN4-3		TC00821297	C010	0.00345	ug/ml	7950	2.79							20220328_SR2_Omi_COM
AB01974589	01	Ainno_16335	Ainnocence	22AIN4-3		TC00821297	C011	0.00109	ug/ml	6675	1.23							20220328_SR2_Omi_COM
AB01974589	01	Ainno_16335	Ainnocence	22AIN4-3		TC00821297	C012	0.000345	ug/ml	4825	-1.05							20220328_SR2_Omi_COM
AB01974605	01	Ainno_16335	Ainnocence	22AIN4-19		TC00821297	C013	13.56	ug/ml	6000	0.4							20220328_SR2_Omi_COM
AB01974605	01	Ainno_16335	Ainnocence	22AIN4-19		TC00821297	C014	4.29	ug/ml	7600	2.36							20220328_SR2_Omi_COM
AB01974605	01	Ainno_16335	Ainnocence	22AIN4-19		TC00821297	C015	1.36	ug/ml	4600	-1.32							20220328_SR2_Omi_COM
AB01974605	01	Ainno_16335	Ainnocence	22AIN4-19		TC00821297	C016	0.43	ug/ml	5925	0.3							20220328_SR2_Omi_COM
AB01974605	01	Ainno_16335	Ainnocence	22AIN4-19		TC00821297	C017	0.136	ug/ml	5750	0.09							20220328_SR2_Omi_COM
AB01974605	01	Ainno_16335	Ainnocence	22AIN4-19		TC00821297	C018	0.043	ug/ml	4300	-1.69							20220328_SR2_Omi_COM
AB01974605	01	Ainno_16335	Ainnocence	22AIN4-19		TC00821297	C019	0.0136	ug/ml	4125	-1.91							20220328_SR2_Omi_COM
AB01974605	01	Ainno_16335	Ainnocence	22AIN4-19		TC00821297	C020	0.0043	ug/ml	4550	-1.39							20220328_SR2_Omi_COM
AB01974605	01	Ainno_16335	Ainnocence	22AIN4-19		TC00821297	C021	0.00136	ug/ml	5925	0.3							20220328_SR2_Omi_COM
AB01974605	01	Ainno_16335	Ainnocence	22AIN4-19		TC00821297	C022	0.00043	ug/ml	5175	-0.62							20220328_SR2_Omi_COM
AB01974590	01	Ainno_16335	Ainnocence	22AIN4-4		TC00821297	D003	11.33	ug/ml	8700	3.72							20220328_SR2_Omi_COM
AB01974590	01	Ainno_16335	Ainnocence	22AIN4-4		TC00821297	D004	3.59	ug/ml	4300	-1.69							20220328_SR2_Omi_COM
AB01974590	01	Ainno_16335	Ainnocence	22AIN4-4		TC00821297	D005	1.14	ug/ml	5150	-0.65							20220328_SR2_Omi_COM
AB01974590	01	Ainno_16335	Ainnocence	22AIN4-4		TC00821297	D006	0.361	ug/ml	3750	-2.37							20220328_SR2_Omi_COM
AB01974590	01	Ainno_16335	Ainnocence	22AIN4-4		TC00821297	D007	0.114	ug/ml	5125	-0.68							20220328_SR2_Omi_COM
AB01974590	01	Ainno_16335	Ainnocence	22AIN4-4		TC00821297	D008	0.0361	ug/ml	3875	-2.22							20220328_SR2_Omi_COM
AB01974590	01	Ainno_16335	Ainnocence	22AIN4-4		TC00821297	D009	0.0114	ug/ml	8100	2.98							20220328_SR2_Omi_COM
AB01974590	01	Ainno_16335	Ainnocence	22AIN4-4		TC00821297	D010	0.00361	ug/ml	4850	-1.02							20220328_SR2_Omi_COM
AB01974590	01	Ainno_16335	Ainnocence	22AIN4-4		TC00821297	D011	0.00114	ug/ml	4400	-1.57							20220328_SR2_Omi_COM
AB01974590	01	Ainno_16335	Ainnocence	22AIN4-4		TC00821297	D012	0.000361	ug/ml	5375	-0.37							20220328_SR2_Omi_COM
AB01974606	01	Ainno_16335	Ainnocence	22AIN4-20		TC00821297	D013	11.33	ug/ml	7575	2.33							20220328_SR2_Omi_COM
AB01974606	01	Ainno_16335	Ainnocence	22AIN4-20		TC00821297	D014	3.59	ug/ml	5200	-0.59							20220328_SR2_Omi_COM
AB01974606	01	Ainno_16335	Ainnocence	22AIN4-20		TC00821297	D015	1.14	ug/ml	6050	0.46							20220328_SR2_Omi_COM
AB01974606	01	Ainno_16335	Ainnocence	22AIN4-20		TC00821297	D016	0.361	ug/ml	5250	-0.53							20220328_SR2_Omi_COM
AB01974606	01	Ainno_16335	Ainnocence	22AIN4-20		TC00821297	D017	0.114	ug/ml	4000	-2.06							20220328_SR2_Omi_COM
AB01974606	01	Ainno_16335	Ainnocence	22AIN4-20		TC00821297	D018	0.0361	ug/ml	4475	-1.48							20220328_SR2_Omi_COM
AB01974606	01	Ainno_16335	Ainnocence	22AIN4-20		TC00821297	D019	0.0114	ug/ml	4400	-1.57							20220328_SR2_Omi_COM
AB01974606	01	Ainno_16335	Ainnocence	22AIN4-20		TC00821297	D020	0.00361	ug/ml	4575	-1.36							20220328_SR2_Omi_COM
AB01974606	01	Ainno_16335	Ainnocence	22AIN4-20		TC00821297	D021	0.00114	ug/ml	6075	0.49							20220328_SR2_Omi_COM
AB01974606	01	Ainno_16335	Ainnocence	22AIN4-20		TC00821297	D022	0.000361	ug/ml	5425	-0.31							20220328_SR2_Omi_COM
AB01974591	01	Ainno_16335	Ainnocence	22AIN4-5		TC00821297	E003	11.22	ug/ml	7875	2.7							20220328_SR2_Omi_COM
AB01974591	01	Ainno_16335	Ainnocence	22AIN4-5		TC00821297	E004	3.55	ug/ml	5150	-0.65							20220328_SR2_Omi_COM
AB01974591	01	Ainno_16335	Ainnocence	22AIN4-5		TC00821297	E005	1.12	ug/ml	5825	0.18							20220328_SR2_Omi_COM
AB01974591	01	Ainno_16335	Ainnocence	22AIN4-5		TC00821297	E006	0.354	ug/ml	4825	-1.05							20220328_SR2_Omi_COM
AB01974591	01	Ainno_16335	Ainnocence	22AIN4-5		TC00821297	E007	0.112	ug/ml	5450	-0.28							20220328_SR2_Omi_COM
AB01974591	01	Ainno_16335	Ainnocence	22AIN4-5		TC00821297	E008	0.0354	ug/ml	5550	-0.16							20220328_SR2_Omi_COM
AB01974591	01	Ainno_16335	Ainnocence	22AIN4-5		TC00821297	E009	0.0112	ug/ml	4700	-1.2							20220328_SR2_Omi_COM
AB01974591	01	Ainno_16335	Ainnocence	22AIN4-5		TC00821297	E010	0.00354	ug/ml	6075	0.49							20220328_SR2_Omi_COM
AB01974591	01	Ainno_16335	Ainnocence	22AIN4-5		TC00821297	E011	0.00112	ug/ml	4100	-1.94							20220328_SR2_Omi_COM
AB01974591	01	Ainno_16335	Ainnocence	22AIN4-5		TC00821297	E012	0.000354	ug/ml	3675	-2.46							20220328_SR2_Omi_COM
AB01974592	01	Ainno_16335	Ainnocence	22AIN4-6		TC00821297	F003	11.78	ug/ml	5400	-0.34							20220328_SR2_Omi_COM
AB01974592	01	Ainno_16335	Ainnocence	22AIN4-6		TC00821297	F004	3.73	ug/ml	6550	1.07							20220328_SR2_Omi_COM
AB01974592	01	Ainno_16335	Ainnocence	22AIN4-6		TC00821297	F005	1.18	ug/ml	6850	1.44							20220328_SR2_Omi_COM
AB01974592	01	Ainno_16335	Ainnocence	22AIN4-6		TC00821297	F006	0.373	ug/ml	5450	-0.28							20220328_SR2_Omi_COM
AB01974592	01	Ainno_16335	Ainnocence	22AIN4-6		TC00821297	F007	0.118	ug/ml	4950	-0.89							20220328_SR2_Omi_COM
AB01974592	01	Ainno_16335	Ainnocence	22AIN4-6		TC00821297	F008	0.0373	ug/ml	4175	-1.85							20220328_SR2_Omi_COM
AB01974592	01	Ainno_16335	Ainnocence	22AIN4-6		TC00821297	F009	0.0118	ug/ml	5000	-0.83							20220328_SR2_Omi_COM
AB01974592	01	Ainno_16335	Ainnocence	22AIN4-6		TC00821297	F010	0.00373	ug/ml	3350	-2.86							20220328_SR2_Omi_COM
AB01974592	01	Ainno_16335	Ainnocence	22AIN4-6		TC00821297	F011	0.00118	ug/ml	4625	-1.29							20220328_SR2_Omi_COM
AB01974592	01	Ainno_16335	Ainnocence	22AIN4-6		TC00821297	F012	0.000373	ug/ml	3375	-2.83							20220328_SR2_Omi_COM
AB01974593	01	Ainno_16335	Ainnocence	22AIN4-7		TC00821297	G003	11.78	ug/ml	8825	3.87							20220328_SR2_Omi_COM
AB01974593	01	Ainno_16335	Ainnocence	22AIN4-7		TC00821297	G004	3.73	ug/ml	6550	1.07							20220328_SR2_Omi_COM
AB01974593	01	Ainno_16335	Ainnocence	22AIN4-7		TC00821297	G005	1.18	ug/ml	6375	0.86							20220328_SR2_Omi_COM
AB01974593	01	Ainno_16335	Ainnocence	22AIN4-7		TC00821297	G006	0.373	ug/ml	5625	-0.06							20220328_SR2_Omi_COM
AB01974593	01	Ainno_16335	Ainnocence	22AIN4-7		TC00821297	G007	0.118	ug/ml	7475	2.21							20220328_SR2_Omi_COM
AB01974593	01	Ainno_16335	Ainnocence	22AIN4-7		TC00821297	G008	0.0373	ug/ml	6600	1.13							20220328_SR2_Omi_COM
AB01974593	01	Ainno_16335	Ainnocence	22AIN4-7		TC00821297	G009	0.0118	ug/ml	5000	-0.83							20220328_SR2_Omi_COM
AB01974593	01	Ainno_16335	Ainnocence	22AIN4-7		TC00821297	G010	0.00373	ug/ml	6125	0.55							20220328_SR2_Omi_COM
AB01974593	01	Ainno_16335	Ainnocence	22AIN4-7		TC00821297	G011	0.00118	ug/ml	6275	0.73							20220328_SR2_Omi_COM
AB01974593	01	Ainno_16335	Ainnocence	22AIN4-7		TC00821297	G012	0.000373	ug/ml	6125	0.55							20220328_SR2_Omi_COM
AB01974594	01	Ainno_16335	Ainnocence	22AIN4-8		TC00821297	H003	11.22	ug/ml	7725	2.52							20220328_SR2_Omi_COM
AB01974594	01	Ainno_16335	Ainnocence	22AIN4-8		TC00821297	H004	3.55	ug/ml	8125	3.01							20220328_SR2_Omi_COM
AB01974594	01	Ainno_16335	Ainnocence	22AIN4-8		TC00821297	H005	1.12	ug/ml	5975	0.37							20220328_SR2_Omi_COM
AB01974594	01	Ainno_16335	Ainnocence	22AIN4-8		TC00821297	H006	0.354	ug/ml	8850	3.9							20220328_SR2_Omi_COM
AB01974594	01	Ainno_16335	Ainnocence	22AIN4-8		TC00821297	H007	0.112	ug/ml	6975	1.6							20220328_SR2_Omi_COM
AB01974594	01	Ainno_16335	Ainnocence	22AIN4-8		TC00821297	H008	0.0354	ug/ml	7825	2.64							20220328_SR2_Omi_COM
AB01974594	01	Ainno_16335	Ainnocence	22AIN4-8		TC00821297	H009	0.0112	ug/ml	9200	4.33							20220328_SR2_Omi_COM
AB01974594	01	Ainno_16335	Ainnocence	22AIN4-8		TC00821297	H010	0.00354	ug/ml	6625	1.17							20220328_SR2_Omi_COM
AB01974594	01	Ainno_16335	Ainnocence	22AIN4-8		TC00821297	H011	0.00112	ug/ml	6175	0.61							20220328_SR2_Omi_COM
AB01974594	01	Ainno_16335	Ainnocence	22AIN4-8		TC00821297	H012	0.000354	ug/ml	8050	2.92							20220328_SR2_Omi_COM
AB01974595	01	Ainno_16335	Ainnocence	22AIN4-9		TC00821297	I003	11.11	ug/ml	5775	0.12							20220328_SR2_Omi_COM
AB01974595	01	Ainno_16335	Ainnocence	22AIN4-9		TC00821297	I004	3.52	ug/ml	6550	1.07							20220328_SR2_Omi_COM
AB01974595	01	Ainno_16335	Ainnocence	22AIN4-9		TC00821297	I005	1.11	ug/ml	5500	-0.22							20220328_SR2_Omi_COM
AB01974595	01	Ainno_16335	Ainnocence	22AIN4-9		TC00821297	I006	0.351	ug/ml	5775	0.12							20220328_SR2_Omi_COM
AB01974595	01	Ainno_16335	Ainnocence	22AIN4-9		TC00821297	I007	0.111	ug/ml	4975	-0.86							20220328_SR2_Omi_COM
AB01974595	01	Ainno_16335	Ainnocence	22AIN4-9		TC00821297	I008	0.0351	ug/ml	5275	-0.49							20220328_SR2_Omi_COM
AB01974595	01	Ainno_16335	Ainnocence	22AIN4-9		TC00821297	I009	0.0111	ug/ml	6925	1.53							20220328_SR2_Omi_COM
AB01974595	01	Ainno_16335	Ainnocence	22AIN4-9		TC00821297	I010	0.00351	ug/ml	4625	-1.29							20220328_SR2_Omi_COM
AB01974595	01	Ainno_16335	Ainnocence	22AIN4-9		TC00821297	I011	0.00111	ug/ml	8050	2.92							20220328_SR2_Omi_COM
AB01974595	01	Ainno_16335	Ainnocence	22AIN4-9		TC00821297	I012	0.000351	ug/ml	6150	0.58							20220328_SR2_Omi_COM
AB01974596	01	Ainno_16335	Ainnocence	22AIN4-10		TC00821297	J003	12.67	ug/ml	5775	0.12							20220328_SR2_Omi_COM
AB01974596	01	Ainno_16335	Ainnocence	22AIN4-10		TC00821297	J004	4.01	ug/ml	6275	0.73							20220328_SR2_Omi_COM
AB01974596	01	Ainno_16335	Ainnocence	22AIN4-10		TC00821297	J005	1.27	ug/ml	4900	-0.96							20220328_SR2_Omi_COM
AB01974596	01	Ainno_16335	Ainnocence	22AIN4-10		TC00821297	J006	0.402	ug/ml	5700	0.03							20220328_SR2_Omi_COM
AB01974596	01	Ainno_16335	Ainnocence	22AIN4-10		TC00821297	J007	0.127	ug/ml	11775	7.5							20220328_SR2_Omi_COM
AB01974596	01	Ainno_16335	Ainnocence	22AIN4-10		TC00821297	J008	0.0402	ug/ml	3900	-2.19							20220328_SR2_Omi_COM
AB01974596	01	Ainno_16335	Ainnocence	22AIN4-10		TC00821297	J009	0.0127	ug/ml	4775	-1.11							20220328_SR2_Omi_COM
AB01974596	01	Ainno_16335	Ainnocence	22AIN4-10		TC00821297	J010	0.00402	ug/ml	5250	-0.53							20220328_SR2_Omi_COM
AB01974596	01	Ainno_16335	Ainnocence	22AIN4-10		TC00821297	J011	0.00127	ug/ml	5975	0.37							20220328_SR2_Omi_COM
AB01974596	01	Ainno_16335	Ainnocence	22AIN4-10		TC00821297	J012	0.000402	ug/ml	4500	-1.45							20220328_SR2_Omi_COM
AB01974597	01	Ainno_16335	Ainnocence	22AIN4-11		TC00821297	K003	11	ug/ml	6450	0.95							20220328_SR2_Omi_COM
AB01974597	01	Ainno_16335	Ainnocence	22AIN4-11		TC00821297	K004	3.48	ug/ml	11525	7.19							20220328_SR2_Omi_COM
AB01974597	01	Ainno_16335	Ainnocence	22AIN4-11		TC00821297	K005	1.1	ug/ml	6325	0.8							20220328_SR2_Omi_COM
AB01974597	01	Ainno_16335	Ainnocence	22AIN4-11		TC00821297	K006	0.348	ug/ml	5500	-0.22							20220328_SR2_Omi_COM
AB01974597	01	Ainno_16335	Ainnocence	22AIN4-11		TC00821297	K007	0.11	ug/ml	6250	0.7							20220328_SR2_Omi_COM
AB01974597	01	Ainno_16335	Ainnocence	22AIN4-11		TC00821297	K008	0.0348	ug/ml	5250	-0.53							20220328_SR2_Omi_COM
AB01974597	01	Ainno_16335	Ainnocence	22AIN4-11		TC00821297	K009	0.011	ug/ml	4950	-0.89							20220328_SR2_Omi_COM
AB01974597	01	Ainno_16335	Ainnocence	22AIN4-11		TC00821297	K010	0.00348	ug/ml	7100	1.75							20220328_SR2_Omi_COM
AB01974597	01	Ainno_16335	Ainnocence	22AIN4-11		TC00821297	K011	0.0011	ug/ml	7400	2.12							20220328_SR2_Omi_COM
AB01974597	01	Ainno_16335	Ainnocence	22AIN4-11		TC00821297	K012	0.000348	ug/ml	6725	1.29							20220328_SR2_Omi_COM
AB01974598	01	Ainno_16335	Ainnocence	22AIN4-12		TC00821297	L003	11	ug/ml	7050	1.69							20220328_SR2_Omi_COM
AB01974598	01	Ainno_16335	Ainnocence	22AIN4-12		TC00821297	L004	3.48	ug/ml	8925	3.99							20220328_SR2_Omi_COM
AB01974598	01	Ainno_16335	Ainnocence	22AIN4-12		TC00821297	L005	1.1	ug/ml	8025	2.89							20220328_SR2_Omi_COM
AB01974598	01	Ainno_16335	Ainnocence	22AIN4-12		TC00821297	L006	0.348	ug/ml	9600	4.82							20220328_SR2_Omi_COM
AB01974598	01	Ainno_16335	Ainnocence	22AIN4-12		TC00821297	L007	0.11	ug/ml	5575	-0.13							20220328_SR2_Omi_COM
AB01974598	01	Ainno_16335	Ainnocence	22AIN4-12		TC00821297	L008	0.0348	ug/ml	4750	-1.14							20220328_SR2_Omi_COM
AB01974598	01	Ainno_16335	Ainnocence	22AIN4-12		TC00821297	L009	0.011	ug/ml	5550	-0.16							20220328_SR2_Omi_COM
AB01974598	01	Ainno_16335	Ainnocence	22AIN4-12		TC00821297	L010	0.00348	ug/ml	5275	-0.49							20220328_SR2_Omi_COM
AB01974598	01	Ainno_16335	Ainnocence	22AIN4-12		TC00821297	L011	0.0011	ug/ml	4125	-1.91							20220328_SR2_Omi_COM
AB01974598	01	Ainno_16335	Ainnocence	22AIN4-12		TC00821297	L012	0.000348	ug/ml	6000	0.4							20220328_SR2_Omi_COM
AB01974599	01	Ainno_16335	Ainnocence	22AIN4-13		TC00821297	M003	11.11	ug/ml	5625	-0.06							20220328_SR2_Omi_COM
AB01974599	01	Ainno_16335	Ainnocence	22AIN4-13		TC00821297	M004	3.52	ug/ml	4275	-1.72							20220328_SR2_Omi_COM
AB01974599	01	Ainno_16335	Ainnocence	22AIN4-13		TC00821297	M005	1.11	ug/ml	3775	-2.34							20220328_SR2_Omi_COM
AB01974599	01	Ainno_16335	Ainnocence	22AIN4-13		TC00821297	M006	0.351	ug/ml	7525	2.27							20220328_SR2_Omi_COM
AB01974599	01	Ainno_16335	Ainnocence	22AIN4-13		TC00821297	M007	0.111	ug/ml	4325	-1.66							20220328_SR2_Omi_COM
AB01974599	01	Ainno_16335	Ainnocence	22AIN4-13		TC00821297	M008	0.0351	ug/ml	5125	-0.68							20220328_SR2_Omi_COM
AB01974599	01	Ainno_16335	Ainnocence	22AIN4-13		TC00821297	M009	0.0111	ug/ml	5175	-0.62							20220328_SR2_Omi_COM
AB01974599	01	Ainno_16335	Ainnocence	22AIN4-13		TC00821297	M010	0.00351	ug/ml	5850	0.21							20220328_SR2_Omi_COM
AB01974599	01	Ainno_16335	Ainnocence	22AIN4-13		TC00821297	M011	0.00111	ug/ml	4650	-1.26							20220328_SR2_Omi_COM
AB01974599	01	Ainno_16335	Ainnocence	22AIN4-13		TC00821297	M012	0.000351	ug/ml	3850	-2.25							20220328_SR2_Omi_COM
AB01974600	01	Ainno_16335	Ainnocence	22AIN4-14		TC00821297	N003	10.78	ug/ml	5900	0.27							20220328_SR2_Omi_COM
AB01974600	01	Ainno_16335	Ainnocence	22AIN4-14		TC00821297	N004	3.41	ug/ml	5725	0.06							20220328_SR2_Omi_COM
AB01974600	01	Ainno_16335	Ainnocence	22AIN4-14		TC00821297	N005	1.08	ug/ml	4975	-0.86							20220328_SR2_Omi_COM
AB01974600	01	Ainno_16335	Ainnocence	22AIN4-14		TC00821297	N006	0.342	ug/ml	5300	-0.46							20220328_SR2_Omi_COM
AB01974600	01	Ainno_16335	Ainnocence	22AIN4-14		TC00821297	N007	0.108	ug/ml	4525	-1.42							20220328_SR2_Omi_COM
AB01974600	01	Ainno_16335	Ainnocence	22AIN4-14		TC00821297	N008	0.0342	ug/ml	6150	0.58							20220328_SR2_Omi_COM
AB01974600	01	Ainno_16335	Ainnocence	22AIN4-14		TC00821297	N009	0.0108	ug/ml	5325	-0.43							20220328_SR2_Omi_COM
AB01974600	01	Ainno_16335	Ainnocence	22AIN4-14		TC00821297	N010	0.00342	ug/ml	5200	-0.59							20220328_SR2_Omi_COM
AB01974600	01	Ainno_16335	Ainnocence	22AIN4-14		TC00821297	N011	0.00108	ug/ml	3875	-2.22							20220328_SR2_Omi_COM
AB01974600	01	Ainno_16335	Ainnocence	22AIN4-14		TC00821297	N012	0.000342	ug/ml	5350	-0.4							20220328_SR2_Omi_COM
AB01974601	01	Ainno_16335	Ainnocence	22AIN4-15		TC00821297	O003	11.56	ug/ml	5400	-0.34							20220328_SR2_Omi_COM
AB01974601	01	Ainno_16335	Ainnocence	22AIN4-15		TC00821297	O004	3.66	ug/ml	4950	-0.89							20220328_SR2_Omi_COM
AB01974601	01	Ainno_16335	Ainnocence	22AIN4-15		TC00821297	O005	1.16	ug/ml	5525	-0.19							20220328_SR2_Omi_COM
AB01974601	01	Ainno_16335	Ainnocence	22AIN4-15		TC00821297	O006	0.367	ug/ml	6075	0.49							20220328_SR2_Omi_COM
AB01974601	01	Ainno_16335	Ainnocence	22AIN4-15		TC00821297	O007	0.116	ug/ml	7475	2.21							20220328_SR2_Omi_COM
AB01974601	01	Ainno_16335	Ainnocence	22AIN4-15		TC00821297	O008	0.0367	ug/ml	10100	5.44							20220328_SR2_Omi_COM
AB01974601	01	Ainno_16335	Ainnocence	22AIN4-15		TC00821297	O009	0.0116	ug/ml	15025	11.49							20220328_SR2_Omi_COM
AB01974601	01	Ainno_16335	Ainnocence	22AIN4-15		TC00821297	O010	0.00367	ug/ml	4925	-0.93							20220328_SR2_Omi_COM
AB01974601	01	Ainno_16335	Ainnocence	22AIN4-15		TC00821297	O011	0.00116	ug/ml	6750	1.32							20220328_SR2_Omi_COM
AB01974601	01	Ainno_16335	Ainnocence	22AIN4-15		TC00821297	O012	0.000367	ug/ml	4325	-1.66							20220328_SR2_Omi_COM
AB01974602	01	Ainno_16335	Ainnocence	22AIN4-16		TC00821297	P003	11.11	ug/ml	7600	2.36							20220328_SR2_Omi_COM
AB01974602	01	Ainno_16335	Ainnocence	22AIN4-16		TC00821297	P004	3.52	ug/ml	4425	-1.54							20220328_SR2_Omi_COM
AB01974602	01	Ainno_16335	Ainnocence	22AIN4-16		TC00821297	P005	1.11	ug/ml	6475	0.98							20220328_SR2_Omi_COM
AB01974602	01	Ainno_16335	Ainnocence	22AIN4-16		TC00821297	P006	0.351	ug/ml	4200	-1.82							20220328_SR2_Omi_COM
AB01974602	01	Ainno_16335	Ainnocence	22AIN4-16		TC00821297	P007	0.111	ug/ml	7500	2.24							20220328_SR2_Omi_COM
AB01974602	01	Ainno_16335	Ainnocence	22AIN4-16		TC00821297	P008	0.0351	ug/ml	5475	-0.25							20220328_SR2_Omi_COM
AB01974602	01	Ainno_16335	Ainnocence	22AIN4-16		TC00821297	P009	0.0111	ug/ml	11550	7.22							20220328_SR2_Omi_COM
AB01974602	01	Ainno_16335	Ainnocence	22AIN4-16		TC00821297	P010	0.00351	ug/ml	3700	-2.43							20220328_SR2_Omi_COM
AB01974602	01	Ainno_16335	Ainnocence	22AIN4-16		TC00821297	P011	0.00111	ug/ml	8450	3.41							20220328_SR2_Omi_COM
AB01974602	01	Ainno_16335	Ainnocence	22AIN4-16		TC00821297	P012	0.000351	ug/ml	5225	-0.56							20220328_SR2_Omi_COM
AB01974587	01	Ainno_16335	Ainnocence	22AIN4-1		TC00821298	A003	11	ug/ml	6375	-0.68	>11.00	Inactive	0.23	2.16	>9999	20	20220328_SR2_Omi_COM
AB01974587	01	Ainno_16335	Ainnocence	22AIN4-1		TC00821298	A004	3.48	ug/ml	7425	0.61							20220328_SR2_Omi_COM
AB01974587	01	Ainno_16335	Ainnocence	22AIN4-1		TC00821298	A005	1.1	ug/ml	3850	-3.81							20220328_SR2_Omi_COM
AB01974587	01	Ainno_16335	Ainnocence	22AIN4-1		TC00821298	A006	0.348	ug/ml	5450	-1.83							20220328_SR2_Omi_COM
AB01974587	01	Ainno_16335	Ainnocence	22AIN4-1		TC00821298	A007	0.11	ug/ml	6525	-0.5							20220328_SR2_Omi_COM
AB01974587	01	Ainno_16335	Ainnocence	22AIN4-1		TC00821298	A008	0.0348	ug/ml	4650	-2.82							20220328_SR2_Omi_COM
AB01974587	01	Ainno_16335	Ainnocence	22AIN4-1		TC00821298	A009	0.011	ug/ml	7000	0.09							20220328_SR2_Omi_COM
AB01974587	01	Ainno_16335	Ainnocence	22AIN4-1		TC00821298	A010	0.00348	ug/ml	6250	-0.84							20220328_SR2_Omi_COM
AB01974587	01	Ainno_16335	Ainnocence	22AIN4-1		TC00821298	A011	0.0011	ug/ml	4925	-2.48							20220328_SR2_Omi_COM
AB01974587	01	Ainno_16335	Ainnocence	22AIN4-1		TC00821298	A012	0.000348	ug/ml	4875	-2.54							20220328_SR2_Omi_COM
AB01974603	01	Ainno_16335	Ainnocence	22AIN4-17		TC00821298	A013	11.44	ug/ml	8175	1.54	>11.44	Inactive	-1.05	2.07	0	20	20220328_SR2_Omi_COM
AB01974603	01	Ainno_16335	Ainnocence	22AIN4-17		TC00821298	A014	3.62	ug/ml	5000	-2.39							20220328_SR2_Omi_COM
AB01974603	01	Ainno_16335	Ainnocence	22AIN4-17		TC00821298	A015	1.15	ug/ml	5150	-2.2							20220328_SR2_Omi_COM
AB01974603	01	Ainno_16335	Ainnocence	22AIN4-17		TC00821298	A016	0.364	ug/ml	5975	-1.18							20220328_SR2_Omi_COM
AB01974603	01	Ainno_16335	Ainnocence	22AIN4-17		TC00821298	A017	0.115	ug/ml	6700	-0.28							20220328_SR2_Omi_COM
AB01974603	01	Ainno_16335	Ainnocence	22AIN4-17		TC00821298	A018	0.0364	ug/ml	9775	3.52							20220328_SR2_Omi_COM
AB01974603	01	Ainno_16335	Ainnocence	22AIN4-17		TC00821298	A019	0.0115	ug/ml	6725	-0.25							20220328_SR2_Omi_COM
AB01974603	01	Ainno_16335	Ainnocence	22AIN4-17		TC00821298	A020	0.00364	ug/ml	3875	-3.78							20220328_SR2_Omi_COM
AB01974603	01	Ainno_16335	Ainnocence	22AIN4-17		TC00821298	A021	0.00115	ug/ml	7425	0.61							20220328_SR2_Omi_COM
AB01974603	01	Ainno_16335	Ainnocence	22AIN4-17		TC00821298	A022	0.000364	ug/ml	7675	0.92							20220328_SR2_Omi_COM
AB01974588	01	Ainno_16335	Ainnocence	22AIN4-2		TC00821298	B003	12.11	ug/ml	7325	0.49	>12.11	Inactive	-0.49	1.86	0	20	20220328_SR2_Omi_COM
AB01974588	01	Ainno_16335	Ainnocence	22AIN4-2		TC00821298	B004	3.83	ug/ml	7700	0.95							20220328_SR2_Omi_COM
AB01974588	01	Ainno_16335	Ainnocence	22AIN4-2		TC00821298	B005	1.21	ug/ml	7050	0.15							20220328_SR2_Omi_COM
AB01974588	01	Ainno_16335	Ainnocence	22AIN4-2		TC00821298	B006	0.383	ug/ml	6900	-0.03							20220328_SR2_Omi_COM
AB01974588	01	Ainno_16335	Ainnocence	22AIN4-2		TC00821298	B007	0.121	ug/ml	4750	-2.69							20220328_SR2_Omi_COM
AB01974588	01	Ainno_16335	Ainnocence	22AIN4-2		TC00821298	B008	0.0383	ug/ml	6325	-0.75							20220328_SR2_Omi_COM
AB01974588	01	Ainno_16335	Ainnocence	22AIN4-2		TC00821298	B009	0.0121	ug/ml	6600	-0.41							20220328_SR2_Omi_COM
AB01974588	01	Ainno_16335	Ainnocence	22AIN4-2		TC00821298	B010	0.00383	ug/ml	5150	-2.2							20220328_SR2_Omi_COM
AB01974588	01	Ainno_16335	Ainnocence	22AIN4-2		TC00821298	B011	0.00121	ug/ml	3250	-4.55							20220328_SR2_Omi_COM
AB01974588	01	Ainno_16335	Ainnocence	22AIN4-2		TC00821298	B012	0.000383	ug/ml	4800	-2.63							20220328_SR2_Omi_COM
AB01974604	01	Ainno_16335	Ainnocence	22AIN4-18		TC00821298	B013	11.56	ug/ml	6800	-0.16	>11.56	Inactive	-1.01	2.6	0	20	20220328_SR2_Omi_COM
AB01974604	01	Ainno_16335	Ainnocence	22AIN4-18		TC00821298	B014	3.66	ug/ml	5625	-1.61							20220328_SR2_Omi_COM
AB01974604	01	Ainno_16335	Ainnocence	22AIN4-18		TC00821298	B015	1.16	ug/ml	4250	-3.31							20220328_SR2_Omi_COM
AB01974604	01	Ainno_16335	Ainnocence	22AIN4-18		TC00821298	B016	0.367	ug/ml	6625	-0.38							20220328_SR2_Omi_COM
AB01974604	01	Ainno_16335	Ainnocence	22AIN4-18		TC00821298	B017	0.116	ug/ml	4175	-3.41							20220328_SR2_Omi_COM
AB01974604	01	Ainno_16335	Ainnocence	22AIN4-18		TC00821298	B018	0.0367	ug/ml	3975	-3.65							20220328_SR2_Omi_COM
AB01974604	01	Ainno_16335	Ainnocence	22AIN4-18		TC00821298	B019	0.0116	ug/ml	3750	-3.93							20220328_SR2_Omi_COM
AB01974604	01	Ainno_16335	Ainnocence	22AIN4-18		TC00821298	B020	0.00367	ug/ml	4700	-2.76							20220328_SR2_Omi_COM
AB01974604	01	Ainno_16335	Ainnocence	22AIN4-18		TC00821298	B021	0.00116	ug/ml	4175	-3.41							20220328_SR2_Omi_COM
AB01974604	01	Ainno_16335	Ainnocence	22AIN4-18		TC00821298	B022	0.000367	ug/ml	5625	-1.61							20220328_SR2_Omi_COM
AB01974589	01	Ainno_16335	Ainnocence	22AIN4-3		TC00821298	C003	10.89	ug/ml	10350	4.23	>10.89	Inactive	1	1.9	>9999	20	20220328_SR2_Omi_COM
AB01974589	01	Ainno_16335	Ainnocence	22AIN4-3		TC00821298	C004	3.45	ug/ml	4275	-3.28							20220328_SR2_Omi_COM
AB01974589	01	Ainno_16335	Ainnocence	22AIN4-3		TC00821298	C005	1.09	ug/ml	7750	1.02							20220328_SR2_Omi_COM
AB01974589	01	Ainno_16335	Ainnocence	22AIN4-3		TC00821298	C006	0.345	ug/ml	4775	-2.66							20220328_SR2_Omi_COM
AB01974589	01	Ainno_16335	Ainnocence	22AIN4-3		TC00821298	C007	0.109	ug/ml	5075	-2.29							20220328_SR2_Omi_COM
AB01974589	01	Ainno_16335	Ainnocence	22AIN4-3		TC00821298	C008	0.0345	ug/ml	7000	0.09							20220328_SR2_Omi_COM
AB01974589	01	Ainno_16335	Ainnocence	22AIN4-3		TC00821298	C009	0.0109	ug/ml	6350	-0.72							20220328_SR2_Omi_COM
AB01974589	01	Ainno_16335	Ainnocence	22AIN4-3		TC00821298	C010	0.00345	ug/ml	7700	0.95							20220328_SR2_Omi_COM
AB01974589	01	Ainno_16335	Ainnocence	22AIN4-3		TC00821298	C011	0.00109	ug/ml	5725	-1.49							20220328_SR2_Omi_COM
AB01974589	01	Ainno_16335	Ainnocence	22AIN4-3		TC00821298	C012	0.000345	ug/ml	6250	-0.84							20220328_SR2_Omi_COM
AB01974605	01	Ainno_16335	Ainnocence	22AIN4-19		TC00821298	C013	13.56	ug/ml	5000	-2.39	>13.56	Inactive	19.75	2.08		20	20220328_SR2_Omi_COM
AB01974605	01	Ainno_16335	Ainnocence	22AIN4-19		TC00821298	C014	4.29	ug/ml	6200	-0.9							20220328_SR2_Omi_COM
AB01974605	01	Ainno_16335	Ainnocence	22AIN4-19		TC00821298	C015	1.36	ug/ml	5825	-1.36							20220328_SR2_Omi_COM
AB01974605	01	Ainno_16335	Ainnocence	22AIN4-19		TC00821298	C016	0.43	ug/ml	6250	-0.84							20220328_SR2_Omi_COM
AB01974605	01	Ainno_16335	Ainnocence	22AIN4-19		TC00821298	C017	0.136	ug/ml	7325	0.49							20220328_SR2_Omi_COM
AB01974605	01	Ainno_16335	Ainnocence	22AIN4-19		TC00821298	C018	0.043	ug/ml	6150	-0.96							20220328_SR2_Omi_COM
AB01974605	01	Ainno_16335	Ainnocence	22AIN4-19		TC00821298	C019	0.0136	ug/ml	5000	-2.39							20220328_SR2_Omi_COM
AB01974605	01	Ainno_16335	Ainnocence	22AIN4-19		TC00821298	C020	0.0043	ug/ml	4000	-3.62							20220328_SR2_Omi_COM
AB01974605	01	Ainno_16335	Ainnocence	22AIN4-19		TC00821298	C021	0.00136	ug/ml	10575	4.51							20220328_SR2_Omi_COM
AB01974605	01	Ainno_16335	Ainnocence	22AIN4-19		TC00821298	C022	0.00043	ug/ml	4100	-3.5							20220328_SR2_Omi_COM
AB01974590	01	Ainno_16335	Ainnocence	22AIN4-4		TC00821298	D003	11.33	ug/ml	10325	4.2	>11.33	Inactive	7.21	2.4	1538.1	20	20220328_SR2_Omi_COM
AB01974590	01	Ainno_16335	Ainnocence	22AIN4-4		TC00821298	D004	3.59	ug/ml	3625	-4.09							20220328_SR2_Omi_COM
AB01974590	01	Ainno_16335	Ainnocence	22AIN4-4		TC00821298	D005	1.14	ug/ml	7125	0.24							20220328_SR2_Omi_COM
AB01974590	01	Ainno_16335	Ainnocence	22AIN4-4		TC00821298	D006	0.361	ug/ml	4700	-2.76							20220328_SR2_Omi_COM
AB01974590	01	Ainno_16335	Ainnocence	22AIN4-4		TC00821298	D007	0.114	ug/ml	5350	-1.95							20220328_SR2_Omi_COM
AB01974590	01	Ainno_16335	Ainnocence	22AIN4-4		TC00821298	D008	0.0361	ug/ml	3850	-3.81							20220328_SR2_Omi_COM
AB01974590	01	Ainno_16335	Ainnocence	22AIN4-4		TC00821298	D009	0.0114	ug/ml	9225	2.84							20220328_SR2_Omi_COM
AB01974590	01	Ainno_16335	Ainnocence	22AIN4-4		TC00821298	D010	0.00361	ug/ml	3450	-4.3							20220328_SR2_Omi_COM
AB01974590	01	Ainno_16335	Ainnocence	22AIN4-4		TC00821298	D011	0.00114	ug/ml	7275	0.43							20220328_SR2_Omi_COM
AB01974590	01	Ainno_16335	Ainnocence	22AIN4-4		TC00821298	D012	0.000361	ug/ml	4725	-2.73							20220328_SR2_Omi_COM
AB01974606	01	Ainno_16335	Ainnocence	22AIN4-20		TC00821298	D013	11.33	ug/ml	8575	2.04	>11.33	Inactive	-0.49	1.85	0	20	20220328_SR2_Omi_COM
AB01974606	01	Ainno_16335	Ainnocence	22AIN4-20		TC00821298	D014	3.59	ug/ml	6900	-0.03							20220328_SR2_Omi_COM
AB01974606	01	Ainno_16335	Ainnocence	22AIN4-20		TC00821298	D015	1.14	ug/ml	8375	1.79							20220328_SR2_Omi_COM
AB01974606	01	Ainno_16335	Ainnocence	22AIN4-20		TC00821298	D016	0.361	ug/ml	5150	-2.2							20220328_SR2_Omi_COM
AB01974606	01	Ainno_16335	Ainnocence	22AIN4-20		TC00821298	D017	0.114	ug/ml	4100	-3.5							20220328_SR2_Omi_COM
AB01974606	01	Ainno_16335	Ainnocence	22AIN4-20		TC00821298	D018	0.0361	ug/ml	5900	-1.27							20220328_SR2_Omi_COM
AB01974606	01	Ainno_16335	Ainnocence	22AIN4-20		TC00821298	D019	0.0114	ug/ml	8425	1.85							20220328_SR2_Omi_COM
AB01974606	01	Ainno_16335	Ainnocence	22AIN4-20		TC00821298	D020	0.00361	ug/ml	6275	-0.81							20220328_SR2_Omi_COM
AB01974606	01	Ainno_16335	Ainnocence	22AIN4-20		TC00821298	D021	0.00114	ug/ml	5475	-1.8							20220328_SR2_Omi_COM
AB01974606	01	Ainno_16335	Ainnocence	22AIN4-20		TC00821298	D022	0.000361	ug/ml	4250	-3.31							20220328_SR2_Omi_COM
AB01974591	01	Ainno_16335	Ainnocence	22AIN4-5		TC00821298	E003	11.22	ug/ml	7750	1.02	>11.22	Inactive	-0.37	1.75	0	20	20220328_SR2_Omi_COM
AB01974591	01	Ainno_16335	Ainnocence	22AIN4-5		TC00821298	E004	3.55	ug/ml	8075	1.42							20220328_SR2_Omi_COM
AB01974591	01	Ainno_16335	Ainnocence	22AIN4-5		TC00821298	E005	1.12	ug/ml	4900	-2.51							20220328_SR2_Omi_COM
AB01974591	01	Ainno_16335	Ainnocence	22AIN4-5		TC00821298	E006	0.354	ug/ml	5025	-2.35							20220328_SR2_Omi_COM
AB01974591	01	Ainno_16335	Ainnocence	22AIN4-5		TC00821298	E007	0.112	ug/ml	8450	1.88							20220328_SR2_Omi_COM
AB01974591	01	Ainno_16335	Ainnocence	22AIN4-5		TC00821298	E008	0.0354	ug/ml	3975	-3.65							20220328_SR2_Omi_COM
AB01974591	01	Ainno_16335	Ainnocence	22AIN4-5		TC00821298	E009	0.0112	ug/ml	5800	-1.4							20220328_SR2_Omi_COM
AB01974591	01	Ainno_16335	Ainnocence	22AIN4-5		TC00821298	E010	0.00354	ug/ml	6450	-0.59							20220328_SR2_Omi_COM
AB01974591	01	Ainno_16335	Ainnocence	22AIN4-5		TC00821298	E011	0.00112	ug/ml	6525	-0.5							20220328_SR2_Omi_COM
AB01974591	01	Ainno_16335	Ainnocence	22AIN4-5		TC00821298	E012	0.000354	ug/ml	6475	-0.56							20220328_SR2_Omi_COM
AB01974592	01	Ainno_16335	Ainnocence	22AIN4-6		TC00821298	F003	11.78	ug/ml	8075	1.42	>11.78	Inactive	0.49	2.26	>9999	20	20220328_SR2_Omi_COM
AB01974592	01	Ainno_16335	Ainnocence	22AIN4-6		TC00821298	F004	3.73	ug/ml	5000	-2.39							20220328_SR2_Omi_COM
AB01974592	01	Ainno_16335	Ainnocence	22AIN4-6		TC00821298	F005	1.18	ug/ml	6575	-0.44							20220328_SR2_Omi_COM
AB01974592	01	Ainno_16335	Ainnocence	22AIN4-6		TC00821298	F006	0.373	ug/ml	11200	5.28							20220328_SR2_Omi_COM
AB01974592	01	Ainno_16335	Ainnocence	22AIN4-6		TC00821298	F007	0.118	ug/ml	8475	1.91							20220328_SR2_Omi_COM
AB01974592	01	Ainno_16335	Ainnocence	22AIN4-6		TC00821298	F008	0.0373	ug/ml	6325	-0.75							20220328_SR2_Omi_COM
AB01974592	01	Ainno_16335	Ainnocence	22AIN4-6		TC00821298	F009	0.0118	ug/ml	4850	-2.57							20220328_SR2_Omi_COM
AB01974592	01	Ainno_16335	Ainnocence	22AIN4-6		TC00821298	F010	0.00373	ug/ml	5525	-1.74							20220328_SR2_Omi_COM
AB01974592	01	Ainno_16335	Ainnocence	22AIN4-6		TC00821298	F011	0.00118	ug/ml	7975	1.3							20220328_SR2_Omi_COM
AB01974592	01	Ainno_16335	Ainnocence	22AIN4-6		TC00821298	F012	0.000373	ug/ml	3825	-3.84							20220328_SR2_Omi_COM
AB01974593	01	Ainno_16335	Ainnocence	22AIN4-7		TC00821298	G003	11.78	ug/ml	15325	10.39	>11.78	Inactive	3.58	1.68	39.5	20	20220328_SR2_Omi_COM
AB01974593	01	Ainno_16335	Ainnocence	22AIN4-7		TC00821298	G004	3.73	ug/ml	6300	-0.78							20220328_SR2_Omi_COM
AB01974593	01	Ainno_16335	Ainnocence	22AIN4-7		TC00821298	G005	1.18	ug/ml	5075	-2.29							20220328_SR2_Omi_COM
AB01974593	01	Ainno_16335	Ainnocence	22AIN4-7		TC00821298	G006	0.373	ug/ml	7150	0.27							20220328_SR2_Omi_COM
AB01974593	01	Ainno_16335	Ainnocence	22AIN4-7		TC00821298	G007	0.118	ug/ml	5425	-1.86							20220328_SR2_Omi_COM
AB01974593	01	Ainno_16335	Ainnocence	22AIN4-7		TC00821298	G008	0.0373	ug/ml	7150	0.27							20220328_SR2_Omi_COM
AB01974593	01	Ainno_16335	Ainnocence	22AIN4-7		TC00821298	G009	0.0118	ug/ml	4875	-2.54							20220328_SR2_Omi_COM
AB01974593	01	Ainno_16335	Ainnocence	22AIN4-7		TC00821298	G010	0.00373	ug/ml	5700	-1.52							20220328_SR2_Omi_COM
AB01974593	01	Ainno_16335	Ainnocence	22AIN4-7		TC00821298	G011	0.00118	ug/ml	7975	1.3							20220328_SR2_Omi_COM
AB01974593	01	Ainno_16335	Ainnocence	22AIN4-7		TC00821298	G012	0.000373	ug/ml	7125	0.24							20220328_SR2_Omi_COM
AB01974594	01	Ainno_16335	Ainnocence	22AIN4-8		TC00821298	H003	11.22	ug/ml	6950	0.03	>11.22	Inactive	0.16	2.17	>9999	20	20220328_SR2_Omi_COM
AB01974594	01	Ainno_16335	Ainnocence	22AIN4-8		TC00821298	H004	3.55	ug/ml	6550	-0.47							20220328_SR2_Omi_COM
AB01974594	01	Ainno_16335	Ainnocence	22AIN4-8		TC00821298	H005	1.12	ug/ml	7275	0.43							20220328_SR2_Omi_COM
AB01974594	01	Ainno_16335	Ainnocence	22AIN4-8		TC00821298	H006	0.354	ug/ml	4600	-2.88							20220328_SR2_Omi_COM
AB01974594	01	Ainno_16335	Ainnocence	22AIN4-8		TC00821298	H007	0.112	ug/ml	5825	-1.36							20220328_SR2_Omi_COM
AB01974594	01	Ainno_16335	Ainnocence	22AIN4-8		TC00821298	H008	0.0354	ug/ml	4950	-2.45							20220328_SR2_Omi_COM
AB01974594	01	Ainno_16335	Ainnocence	22AIN4-8		TC00821298	H009	0.0112	ug/ml	6075	-1.06							20220328_SR2_Omi_COM
AB01974594	01	Ainno_16335	Ainnocence	22AIN4-8		TC00821298	H010	0.00354	ug/ml	5525	-1.74							20220328_SR2_Omi_COM
AB01974594	01	Ainno_16335	Ainnocence	22AIN4-8		TC00821298	H011	0.00112	ug/ml	6400	-0.65							20220328_SR2_Omi_COM
AB01974594	01	Ainno_16335	Ainnocence	22AIN4-8		TC00821298	H012	0.000354	ug/ml	5750	-1.46							20220328_SR2_Omi_COM
AB01974595	01	Ainno_16335	Ainnocence	22AIN4-9		TC00821298	I003	11.11	ug/ml	7850	1.14	>11.11	Inactive	0.38	1.67	>9999	20	20220328_SR2_Omi_COM
AB01974595	01	Ainno_16335	Ainnocence	22AIN4-9		TC00821298	I004	3.52	ug/ml	7400	0.58							20220328_SR2_Omi_COM
AB01974595	01	Ainno_16335	Ainnocence	22AIN4-9		TC00821298	I005	1.11	ug/ml	4275	-3.28							20220328_SR2_Omi_COM
AB01974595	01	Ainno_16335	Ainnocence	22AIN4-9		TC00821298	I006	0.351	ug/ml	6700	-0.28							20220328_SR2_Omi_COM
AB01974595	01	Ainno_16335	Ainnocence	22AIN4-9		TC00821298	I007	0.111	ug/ml	6225	-0.87							20220328_SR2_Omi_COM
AB01974595	01	Ainno_16335	Ainnocence	22AIN4-9		TC00821298	I008	0.0351	ug/ml	5900	-1.27							20220328_SR2_Omi_COM
AB01974595	01	Ainno_16335	Ainnocence	22AIN4-9		TC00821298	I009	0.0111	ug/ml	4675	-2.79							20220328_SR2_Omi_COM
AB01974595	01	Ainno_16335	Ainnocence	22AIN4-9		TC00821298	I010	0.00351	ug/ml	6525	-0.5							20220328_SR2_Omi_COM
AB01974595	01	Ainno_16335	Ainnocence	22AIN4-9		TC00821298	I011	0.00111	ug/ml	4350	-3.19							20220328_SR2_Omi_COM
AB01974595	01	Ainno_16335	Ainnocence	22AIN4-9		TC00821298	I012	0.000351	ug/ml	5725	-1.49							20220328_SR2_Omi_COM
AB01974596	01	Ainno_16335	Ainnocence	22AIN4-10		TC00821298	J003	12.67	ug/ml	4975	-2.42	>12.67	Inactive	1	2.48	>9999	20	20220328_SR2_Omi_COM
AB01974596	01	Ainno_16335	Ainnocence	22AIN4-10		TC00821298	J004	4.01	ug/ml	7425	0.61							20220328_SR2_Omi_COM
AB01974596	01	Ainno_16335	Ainnocence	22AIN4-10		TC00821298	J005	1.27	ug/ml	3625	-4.09							20220328_SR2_Omi_COM
AB01974596	01	Ainno_16335	Ainnocence	22AIN4-10		TC00821298	J006	0.402	ug/ml	6000	-1.15							20220328_SR2_Omi_COM
AB01974596	01	Ainno_16335	Ainnocence	22AIN4-10		TC00821298	J007	0.127	ug/ml	6250	-0.84							20220328_SR2_Omi_COM
AB01974596	01	Ainno_16335	Ainnocence	22AIN4-10		TC00821298	J008	0.0402	ug/ml	4025	-3.59							20220328_SR2_Omi_COM
AB01974596	01	Ainno_16335	Ainnocence	22AIN4-10		TC00821298	J009	0.0127	ug/ml	5650	-1.58							20220328_SR2_Omi_COM
AB01974596	01	Ainno_16335	Ainnocence	22AIN4-10		TC00821298	J010	0.00402	ug/ml	5875	-1.3							20220328_SR2_Omi_COM
AB01974596	01	Ainno_16335	Ainnocence	22AIN4-10		TC00821298	J011	0.00127	ug/ml	5900	-1.27							20220328_SR2_Omi_COM
AB01974596	01	Ainno_16335	Ainnocence	22AIN4-10		TC00821298	J012	0.000402	ug/ml	6100	-1.02							20220328_SR2_Omi_COM
AB01974597	01	Ainno_16335	Ainnocence	22AIN4-11		TC00821298	K003	11	ug/ml	7525	0.74	>11.00	Inactive	0.68	2.35	>9999	20	20220328_SR2_Omi_COM
AB01974597	01	Ainno_16335	Ainnocence	22AIN4-11		TC00821298	K004	3.48	ug/ml	7475	0.68							20220328_SR2_Omi_COM
AB01974597	01	Ainno_16335	Ainnocence	22AIN4-11		TC00821298	K005	1.1	ug/ml	3900	-3.75							20220328_SR2_Omi_COM
AB01974597	01	Ainno_16335	Ainnocence	22AIN4-11		TC00821298	K006	0.348	ug/ml	6050	-1.09							20220328_SR2_Omi_COM
AB01974597	01	Ainno_16335	Ainnocence	22AIN4-11		TC00821298	K007	0.11	ug/ml	4450	-3.07							20220328_SR2_Omi_COM
AB01974597	01	Ainno_16335	Ainnocence	22AIN4-11		TC00821298	K008	0.0348	ug/ml	5825	-1.36							20220328_SR2_Omi_COM
AB01974597	01	Ainno_16335	Ainnocence	22AIN4-11		TC00821298	K009	0.011	ug/ml	4075	-3.53							20220328_SR2_Omi_COM
AB01974597	01	Ainno_16335	Ainnocence	22AIN4-11		TC00821298	K010	0.00348	ug/ml	7350	0.52							20220328_SR2_Omi_COM
AB01974597	01	Ainno_16335	Ainnocence	22AIN4-11		TC00821298	K011	0.0011	ug/ml	6450	-0.59							20220328_SR2_Omi_COM
AB01974597	01	Ainno_16335	Ainnocence	22AIN4-11		TC00821298	K012	0.000348	ug/ml	5700	-1.52							20220328_SR2_Omi_COM
AB01974598	01	Ainno_16335	Ainnocence	22AIN4-12		TC00821298	L003	11	ug/ml	5000	-2.39	>11.00	Inactive	0.25	2.16	>9999	20	20220328_SR2_Omi_COM
AB01974598	01	Ainno_16335	Ainnocence	22AIN4-12		TC00821298	L004	3.48	ug/ml	5475	-1.8							20220328_SR2_Omi_COM
AB01974598	01	Ainno_16335	Ainnocence	22AIN4-12		TC00821298	L005	1.1	ug/ml	4475	-3.03							20220328_SR2_Omi_COM
AB01974598	01	Ainno_16335	Ainnocence	22AIN4-12		TC00821298	L006	0.348	ug/ml	5600	-1.64							20220328_SR2_Omi_COM
AB01974598	01	Ainno_16335	Ainnocence	22AIN4-12		TC00821298	L007	0.11	ug/ml	8175	1.54							20220328_SR2_Omi_COM
AB01974598	01	Ainno_16335	Ainnocence	22AIN4-12		TC00821298	L008	0.0348	ug/ml	5600	-1.64							20220328_SR2_Omi_COM
AB01974598	01	Ainno_16335	Ainnocence	22AIN4-12		TC00821298	L009	0.011	ug/ml	7100	0.21							20220328_SR2_Omi_COM
AB01974598	01	Ainno_16335	Ainnocence	22AIN4-12		TC00821298	L010	0.00348	ug/ml	7775	1.05							20220328_SR2_Omi_COM
AB01974598	01	Ainno_16335	Ainnocence	22AIN4-12		TC00821298	L011	0.0011	ug/ml	6375	-0.68							20220328_SR2_Omi_COM
AB01974598	01	Ainno_16335	Ainnocence	22AIN4-12		TC00821298	L012	0.000348	ug/ml	6025	-1.12							20220328_SR2_Omi_COM
AB01974599	01	Ainno_16335	Ainnocence	22AIN4-13		TC00821298	M003	11.11	ug/ml	6675	-0.31	>11.11	Inactive	2.01	2.36	>9999	20	20220328_SR2_Omi_COM
AB01974599	01	Ainno_16335	Ainnocence	22AIN4-13		TC00821298	M004	3.52	ug/ml	3725	-3.96							20220328_SR2_Omi_COM
AB01974599	01	Ainno_16335	Ainnocence	22AIN4-13		TC00821298	M005	1.11	ug/ml	4875	-2.54							20220328_SR2_Omi_COM
AB01974599	01	Ainno_16335	Ainnocence	22AIN4-13		TC00821298	M006	0.351	ug/ml	4900	-2.51							20220328_SR2_Omi_COM
AB01974599	01	Ainno_16335	Ainnocence	22AIN4-13		TC00821298	M007	0.111	ug/ml	7675	0.92							20220328_SR2_Omi_COM
AB01974599	01	Ainno_16335	Ainnocence	22AIN4-13		TC00821298	M008	0.0351	ug/ml	7175	0.31							20220328_SR2_Omi_COM
AB01974599	01	Ainno_16335	Ainnocence	22AIN4-13		TC00821298	M009	0.0111	ug/ml	3450	-4.3							20220328_SR2_Omi_COM
AB01974599	01	Ainno_16335	Ainnocence	22AIN4-13		TC00821298	M010	0.00351	ug/ml	5675	-1.55							20220328_SR2_Omi_COM
AB01974599	01	Ainno_16335	Ainnocence	22AIN4-13		TC00821298	M011	0.00111	ug/ml	4000	-3.62							20220328_SR2_Omi_COM
AB01974599	01	Ainno_16335	Ainnocence	22AIN4-13		TC00821298	M012	0.000351	ug/ml	4050	-3.56							20220328_SR2_Omi_COM
AB01974600	01	Ainno_16335	Ainnocence	22AIN4-14		TC00821298	N003	10.78	ug/ml	6325	-0.75	>10.78	Inactive	7.99	2.1	>9999	20	20220328_SR2_Omi_COM
AB01974600	01	Ainno_16335	Ainnocence	22AIN4-14		TC00821298	N004	3.41	ug/ml	5600	-1.64							20220328_SR2_Omi_COM
AB01974600	01	Ainno_16335	Ainnocence	22AIN4-14		TC00821298	N005	1.08	ug/ml	5775	-1.43							20220328_SR2_Omi_COM
AB01974600	01	Ainno_16335	Ainnocence	22AIN4-14		TC00821298	N006	0.342	ug/ml	12000	6.27							20220328_SR2_Omi_COM
AB01974600	01	Ainno_16335	Ainnocence	22AIN4-14		TC00821298	N007	0.108	ug/ml	6775	-0.19							20220328_SR2_Omi_COM
AB01974600	01	Ainno_16335	Ainnocence	22AIN4-14		TC00821298	N008	0.0342	ug/ml	5700	-1.52							20220328_SR2_Omi_COM
AB01974600	01	Ainno_16335	Ainnocence	22AIN4-14		TC00821298	N009	0.0108	ug/ml	4200	-3.38							20220328_SR2_Omi_COM
AB01974600	01	Ainno_16335	Ainnocence	22AIN4-14		TC00821298	N010	0.00342	ug/ml	5275	-2.05							20220328_SR2_Omi_COM
AB01974600	01	Ainno_16335	Ainnocence	22AIN4-14		TC00821298	N011	0.00108	ug/ml	7650	0.89							20220328_SR2_Omi_COM
AB01974600	01	Ainno_16335	Ainnocence	22AIN4-14		TC00821298	N012	0.000342	ug/ml	4800	-2.63							20220328_SR2_Omi_COM
AB01974601	01	Ainno_16335	Ainnocence	22AIN4-15		TC00821298	O003	11.56	ug/ml	5475	-1.8	>11.56	Inactive	-1	3.68	0	20	20220328_SR2_Omi_COM
AB01974601	01	Ainno_16335	Ainnocence	22AIN4-15		TC00821298	O004	3.66	ug/ml	5250	-2.08							20220328_SR2_Omi_COM
AB01974601	01	Ainno_16335	Ainnocence	22AIN4-15		TC00821298	O005	1.16	ug/ml	4925	-2.48							20220328_SR2_Omi_COM
AB01974601	01	Ainno_16335	Ainnocence	22AIN4-15		TC00821298	O006	0.367	ug/ml	6075	-1.06							20220328_SR2_Omi_COM
AB01974601	01	Ainno_16335	Ainnocence	22AIN4-15		TC00821298	O007	0.116	ug/ml	4000	-3.62							20220328_SR2_Omi_COM
AB01974601	01	Ainno_16335	Ainnocence	22AIN4-15		TC00821298	O008	0.0367	ug/ml	6475	-0.56							20220328_SR2_Omi_COM
AB01974601	01	Ainno_16335	Ainnocence	22AIN4-15		TC00821298	O009	0.0116	ug/ml	4600	-2.88							20220328_SR2_Omi_COM
AB01974601	01	Ainno_16335	Ainnocence	22AIN4-15		TC00821298	O010	0.00367	ug/ml	4325	-3.22							20220328_SR2_Omi_COM
AB01974601	01	Ainno_16335	Ainnocence	22AIN4-15		TC00821298	O011	0.00116	ug/ml	3150	-4.67							20220328_SR2_Omi_COM
AB01974601	01	Ainno_16335	Ainnocence	22AIN4-15		TC00821298	O012	0.000367	ug/ml	5775	-1.43							20220328_SR2_Omi_COM
AB01974602	01	Ainno_16335	Ainnocence	22AIN4-16		TC00821298	P003	11.11	ug/ml	9675	3.4	>11.11	Inactive	5.82	2.76	967.57	20	20220328_SR2_Omi_COM
AB01974602	01	Ainno_16335	Ainnocence	22AIN4-16		TC00821298	P004	3.52	ug/ml	6625	-0.38							20220328_SR2_Omi_COM
AB01974602	01	Ainno_16335	Ainnocence	22AIN4-16		TC00821298	P005	1.11	ug/ml	6550	-0.47							20220328_SR2_Omi_COM
AB01974602	01	Ainno_16335	Ainnocence	22AIN4-16		TC00821298	P006	0.351	ug/ml	4425	-3.1							20220328_SR2_Omi_COM
AB01974602	01	Ainno_16335	Ainnocence	22AIN4-16		TC00821298	P007	0.111	ug/ml	6225	-0.87							20220328_SR2_Omi_COM
AB01974602	01	Ainno_16335	Ainnocence	22AIN4-16		TC00821298	P008	0.0351	ug/ml	4425	-3.1							20220328_SR2_Omi_COM
AB01974602	01	Ainno_16335	Ainnocence	22AIN4-16		TC00821298	P009	0.0111	ug/ml	5775	-1.43							20220328_SR2_Omi_COM
AB01974602	01	Ainno_16335	Ainnocence	22AIN4-16		TC00821298	P010	0.00351	ug/ml	3225	-4.58							20220328_SR2_Omi_COM
AB01974602	01	Ainno_16335	Ainnocence	22AIN4-16		TC00821298	P011	0.00111	ug/ml	5975	-1.18							20220328_SR2_Omi_COM
AB01974602	01	Ainno_16335	Ainnocence	22AIN4-16		TC00821298	P012	0.000351	ug/ml	4425	-3.1							20220328_SR2_Omi_COM

## Sheet: Ctrl Wells
Object ID	Batch	Plate	Well	Data value	% Inhibition	Testset ID
Cell Control	01	TC00821291	A001	76750	105.08	20220328_SR2_Omi_COM
Cell Control	01	TC00821291	A002	72975	99.51	20220328_SR2_Omi_COM
Cell Control	01	TC00821291	B001	77300	105.89	20220328_SR2_Omi_COM
Cell Control	01	TC00821291	B002	76850	105.23	20220328_SR2_Omi_COM
Cell Control	01	TC00821291	C001	75950	103.9	20220328_SR2_Omi_COM
Cell Control	01	TC00821291	C002	71475	97.3	20220328_SR2_Omi_COM
Cell Control	01	TC00821291	D001	73025	99.59	20220328_SR2_Omi_COM
Cell Control	01	TC00821291	D002	71125	96.78	20220328_SR2_Omi_COM
Cell Control	01	TC00821291	E001	74925	102.39	20220328_SR2_Omi_COM
Cell Control	01	TC00821291	E002	72075	98.18	20220328_SR2_Omi_COM
Cell Control	01	TC00821291	F001	73250	99.92	20220328_SR2_Omi_COM
Cell Control	01	TC00821291	F002	72825	99.29	20220328_SR2_Omi_COM
Cell Control	01	TC00821291	G001	75750	103.61	20220328_SR2_Omi_COM
Cell Control	01	TC00821291	G002	74050	101.1	20220328_SR2_Omi_COM
Cell Control	01	TC00821291	H001	73875	100.84	20220328_SR2_Omi_COM
Cell Control	01	TC00821291	H002	73925	100.91	20220328_SR2_Omi_COM
Cell Control	01	TC00821291	I002	78175	107.18	20220328_SR2_Omi_COM
Cell Control	01	TC00821291	J001	74150	101.25	20220328_SR2_Omi_COM
Cell Control	01	TC00821291	J002	70350	95.64	20220328_SR2_Omi_COM
Cell Control	01	TC00821291	K001	74125	101.21	20220328_SR2_Omi_COM
Cell Control	01	TC00821291	K002	71700	97.63	20220328_SR2_Omi_COM
Cell Control	01	TC00821291	L001	75400	103.09	20220328_SR2_Omi_COM
Cell Control	01	TC00821291	L002	68350	92.69	20220328_SR2_Omi_COM
Cell Control	01	TC00821291	M001	75425	103.13	20220328_SR2_Omi_COM
Cell Control	01	TC00821291	M002	70950	96.53	20220328_SR2_Omi_COM
Cell Control	01	TC00821291	N001	67100	90.85	20220328_SR2_Omi_COM
Cell Control	01	TC00821291	N002	73875	100.84	20220328_SR2_Omi_COM
Cell Control	01	TC00821291	O001	74650	101.98	20220328_SR2_Omi_COM
Cell Control	01	TC00821291	O002	73725	100.62	20220328_SR2_Omi_COM
Cell Control	01	TC00821291	P001	69625	94.57	20220328_SR2_Omi_COM
Cell Control	01	TC00821291	P002	68750	93.28	20220328_SR2_Omi_COM
Cell Control	01	TC00821292	A001	82975	97.21	20220328_SR2_Omi_COM
Cell Control	01	TC00821292	A002	88650	104.4	20220328_SR2_Omi_COM
Cell Control	01	TC00821292	B001	85850	100.85	20220328_SR2_Omi_COM
Cell Control	01	TC00821292	B002	83800	98.26	20220328_SR2_Omi_COM
Cell Control	01	TC00821292	C001	85750	100.73	20220328_SR2_Omi_COM
Cell Control	01	TC00821292	C002	83950	98.45	20220328_SR2_Omi_COM
Cell Control	01	TC00821292	D001	87700	103.2	20220328_SR2_Omi_COM
Cell Control	01	TC00821292	D002	88125	103.74	20220328_SR2_Omi_COM
Cell Control	01	TC00821292	E001	83375	97.72	20220328_SR2_Omi_COM
Cell Control	01	TC00821292	E002	82875	97.08	20220328_SR2_Omi_COM
Cell Control	01	TC00821292	F001	84525	99.18	20220328_SR2_Omi_COM
Cell Control	01	TC00821292	F002	88175	103.8	20220328_SR2_Omi_COM
Cell Control	01	TC00821292	G001	84050	98.57	20220328_SR2_Omi_COM
Cell Control	01	TC00821292	G002	85250	100.09	20220328_SR2_Omi_COM
Cell Control	01	TC00821292	H001	83125	97.4	20220328_SR2_Omi_COM
Cell Control	01	TC00821292	H002	86775	102.03	20220328_SR2_Omi_COM
Cell Control	01	TC00821292	I001	83025	97.27	20220328_SR2_Omi_COM
Cell Control	01	TC00821292	I002	88800	104.59	20220328_SR2_Omi_COM
Cell Control	01	TC00821292	J001	82900	97.12	20220328_SR2_Omi_COM
Cell Control	01	TC00821292	J002	88525	104.24	20220328_SR2_Omi_COM
Cell Control	01	TC00821292	K001	85850	100.85	20220328_SR2_Omi_COM
Cell Control	01	TC00821292	K002	90550	106.81	20220328_SR2_Omi_COM
Cell Control	01	TC00821292	L001	83550	97.94	20220328_SR2_Omi_COM
Cell Control	01	TC00821292	L002	85200	100.03	20220328_SR2_Omi_COM
Cell Control	01	TC00821292	M001	85050	99.84	20220328_SR2_Omi_COM
Cell Control	01	TC00821292	M002	87750	103.26	20220328_SR2_Omi_COM
Cell Control	01	TC00821292	N001	83375	97.72	20220328_SR2_Omi_COM
Cell Control	01	TC00821292	N002	83175	97.46	20220328_SR2_Omi_COM
Cell Control	01	TC00821292	O001	86550	101.74	20220328_SR2_Omi_COM
Cell Control	01	TC00821292	O002	82450	96.55	20220328_SR2_Omi_COM
Cell Control	01	TC00821292	P001	80650	94.27	20220328_SR2_Omi_COM
Cell Control	01	TC00821292	P002	83275	97.59	20220328_SR2_Omi_COM
Cell Control	01	TC00821294	A001	85625	98.3	20220328_SR2_Omi_COM
Cell Control	01	TC00821294	A002	86600	99.48	20220328_SR2_Omi_COM
Cell Control	01	TC00821294	B001	87775	100.91	20220328_SR2_Omi_COM
Cell Control	01	TC00821294	B002	86525	99.39	20220328_SR2_Omi_COM
Cell Control	01	TC00821294	C001	90875	104.69	20220328_SR2_Omi_COM
Cell Control	01	TC00821294	C002	93675	108.1	20220328_SR2_Omi_COM
Cell Control	01	TC00821294	D001	90000	103.62	20220328_SR2_Omi_COM
Cell Control	01	TC00821294	D002	88150	101.37	20220328_SR2_Omi_COM
Cell Control	01	TC00821294	E001	86600	99.48	20220328_SR2_Omi_COM
Cell Control	01	TC00821294	E002	87800	100.94	20220328_SR2_Omi_COM
Cell Control	01	TC00821294	F001	88175	101.4	20220328_SR2_Omi_COM
Cell Control	01	TC00821294	F002	85250	97.84	20220328_SR2_Omi_COM
Cell Control	01	TC00821294	G001	85650	98.33	20220328_SR2_Omi_COM
Cell Control	01	TC00821294	G002	88100	101.31	20220328_SR2_Omi_COM
Cell Control	01	TC00821294	H001	88575	101.89	20220328_SR2_Omi_COM
Cell Control	01	TC00821294	H002	88525	101.83	20220328_SR2_Omi_COM
Cell Control	01	TC00821294	I001	86400	99.24	20220328_SR2_Omi_COM
Cell Control	01	TC00821294	I002	86125	98.9	20220328_SR2_Omi_COM
Cell Control	01	TC00821294	J001	86350	99.18	20220328_SR2_Omi_COM
Cell Control	01	TC00821294	J002	86700	99.6	20220328_SR2_Omi_COM
Cell Control	01	TC00821294	K001	90250	103.93	20220328_SR2_Omi_COM
Cell Control	01	TC00821294	K002	88900	102.28	20220328_SR2_Omi_COM
Cell Control	01	TC00821294	L001	85500	98.14	20220328_SR2_Omi_COM
Cell Control	01	TC00821294	L002	85125	97.69	20220328_SR2_Omi_COM
Cell Control	01	TC00821294	M001	89250	102.71	20220328_SR2_Omi_COM
Cell Control	01	TC00821294	M002	88200	101.43	20220328_SR2_Omi_COM
Cell Control	01	TC00821294	N001	84725	97.2	20220328_SR2_Omi_COM
Cell Control	01	TC00821294	N002	82025	93.91	20220328_SR2_Omi_COM
Cell Control	01	TC00821294	O001	82000	93.88	20220328_SR2_Omi_COM
Cell Control	01	TC00821294	O002	84700	97.17	20220328_SR2_Omi_COM
Cell Control	01	TC00821294	P001	82050	93.94	20220328_SR2_Omi_COM
Cell Control	01	TC00821294	P002	88600	101.92	20220328_SR2_Omi_COM
Cell Control	01	TC00821295	A001	88350	102.32	20220328_SR2_Omi_COM
Cell Control	01	TC00821295	A002	89825	104.18	20220328_SR2_Omi_COM
Cell Control	01	TC00821295	B001	85625	98.88	20220328_SR2_Omi_COM
Cell Control	01	TC00821295	B002	88075	101.97	20220328_SR2_Omi_COM
Cell Control	01	TC00821295	C001	88050	101.94	20220328_SR2_Omi_COM
Cell Control	01	TC00821295	C002	89450	103.71	20220328_SR2_Omi_COM
Cell Control	01	TC00821295	D001	90050	104.46	20220328_SR2_Omi_COM
Cell Control	01	TC00821295	D002	84875	97.93	20220328_SR2_Omi_COM
Cell Control	01	TC00821295	E001	84650	97.65	20220328_SR2_Omi_COM
Cell Control	01	TC00821295	E002	84225	97.11	20220328_SR2_Omi_COM
Cell Control	01	TC00821295	F001	85200	98.34	20220328_SR2_Omi_COM
Cell Control	01	TC00821295	F002	88450	102.44	20220328_SR2_Omi_COM
Cell Control	01	TC00821295	G001	86450	99.92	20220328_SR2_Omi_COM
Cell Control	01	TC00821295	G002	87250	100.93	20220328_SR2_Omi_COM
Cell Control	01	TC00821295	H001	87950	101.81	20220328_SR2_Omi_COM
Cell Control	01	TC00821295	H002	82900	95.44	20220328_SR2_Omi_COM
Cell Control	01	TC00821295	I001	88225	102.16	20220328_SR2_Omi_COM
Cell Control	01	TC00821295	I002	87300	100.99	20220328_SR2_Omi_COM
Cell Control	01	TC00821295	J001	85800	99.1	20220328_SR2_Omi_COM
Cell Control	01	TC00821295	J002	86450	99.92	20220328_SR2_Omi_COM
Cell Control	01	TC00821295	K001	86025	99.38	20220328_SR2_Omi_COM
Cell Control	01	TC00821295	K002	87075	100.71	20220328_SR2_Omi_COM
Cell Control	01	TC00821295	L001	86575	100.08	20220328_SR2_Omi_COM
Cell Control	01	TC00821295	L002	83975	96.8	20220328_SR2_Omi_COM
Cell Control	01	TC00821295	M001	90950	105.6	20220328_SR2_Omi_COM
Cell Control	01	TC00821295	M002	87850	101.69	20220328_SR2_Omi_COM
Cell Control	01	TC00821295	N001	87175	100.84	20220328_SR2_Omi_COM
Cell Control	01	TC00821295	N002	82625	95.09	20220328_SR2_Omi_COM
Cell Control	01	TC00821295	O001	84600	97.58	20220328_SR2_Omi_COM
Cell Control	01	TC00821295	O002	83575	96.29	20220328_SR2_Omi_COM
Cell Control	01	TC00821295	P001	83250	95.88	20220328_SR2_Omi_COM
Cell Control	01	TC00821295	P002	85600	98.85	20220328_SR2_Omi_COM
Cell Control	01	TC00821297	A001	86725	99.65	20220328_SR2_Omi_COM
Cell Control	01	TC00821297	A002	86125	98.91	20220328_SR2_Omi_COM
Cell Control	01	TC00821297	B001	85525	98.17	20220328_SR2_Omi_COM
Cell Control	01	TC00821297	B002	89625	103.21	20220328_SR2_Omi_COM
Cell Control	01	TC00821297	C001	81775	93.56	20220328_SR2_Omi_COM
Cell Control	01	TC00821297	C002	86375	99.22	20220328_SR2_Omi_COM
Cell Control	01	TC00821297	D001	85700	98.39	20220328_SR2_Omi_COM
Cell Control	01	TC00821297	D002	86200	99	20220328_SR2_Omi_COM
Cell Control	01	TC00821297	E001	87625	100.75	20220328_SR2_Omi_COM
Cell Control	01	TC00821297	E002	85950	98.69	20220328_SR2_Omi_COM
Cell Control	01	TC00821297	F001	88000	101.22	20220328_SR2_Omi_COM
Cell Control	01	TC00821297	F002	89350	102.87	20220328_SR2_Omi_COM
Cell Control	01	TC00821297	G001	88000	101.22	20220328_SR2_Omi_COM
Cell Control	01	TC00821297	G002	91425	105.43	20220328_SR2_Omi_COM
Cell Control	01	TC00821297	H001	90500	104.29	20220328_SR2_Omi_COM
Cell Control	01	TC00821297	H002	84000	96.3	20220328_SR2_Omi_COM
Cell Control	01	TC00821297	I001	90100	103.8	20220328_SR2_Omi_COM
Cell Control	01	TC00821297	I002	87625	100.75	20220328_SR2_Omi_COM
Cell Control	01	TC00821297	J001	85800	98.51	20220328_SR2_Omi_COM
Cell Control	01	TC00821297	J002	85400	98.02	20220328_SR2_Omi_COM
Cell Control	01	TC00821297	K001	87475	100.57	20220328_SR2_Omi_COM
Cell Control	01	TC00821297	K002	85450	98.08	20220328_SR2_Omi_COM
Cell Control	01	TC00821297	L001	84250	96.6	20220328_SR2_Omi_COM
Cell Control	01	TC00821297	L002	88175	101.43	20220328_SR2_Omi_COM
Cell Control	01	TC00821297	M001	85500	98.14	20220328_SR2_Omi_COM
Cell Control	01	TC00821297	M002	90250	103.98	20220328_SR2_Omi_COM
Cell Control	01	TC00821297	N001	87750	100.91	20220328_SR2_Omi_COM
Cell Control	01	TC00821297	N002	87600	100.72	20220328_SR2_Omi_COM
Cell Control	01	TC00821297	O001	85700	98.39	20220328_SR2_Omi_COM
Cell Control	01	TC00821297	O002	89500	103.06	20220328_SR2_Omi_COM
Cell Control	01	TC00821297	P001	84050	96.36	20220328_SR2_Omi_COM
Cell Control	01	TC00821297	P002	86850	99.8	20220328_SR2_Omi_COM
Cell Control	01	TC00821298	A001	85600	97.33	20220328_SR2_Omi_COM
Cell Control	01	TC00821298	A002	88950	101.47	20220328_SR2_Omi_COM
Cell Control	01	TC00821298	B001	84950	96.53	20220328_SR2_Omi_COM
Cell Control	01	TC00821298	B002	87775	100.02	20220328_SR2_Omi_COM
Cell Control	01	TC00821298	C001	89300	101.91	20220328_SR2_Omi_COM
Cell Control	01	TC00821298	C002	85075	96.68	20220328_SR2_Omi_COM
Cell Control	01	TC00821298	D001	82625	93.65	20220328_SR2_Omi_COM
Cell Control	01	TC00821298	D002	90125	102.93	20220328_SR2_Omi_COM
Cell Control	01	TC00821298	E001	90075	102.87	20220328_SR2_Omi_COM
Cell Control	01	TC00821298	E002	90125	102.93	20220328_SR2_Omi_COM
Cell Control	01	TC00821298	F001	88750	101.23	20220328_SR2_Omi_COM
Cell Control	01	TC00821298	F002	86700	98.69	20220328_SR2_Omi_COM
Cell Control	01	TC00821298	G001	89775	102.49	20220328_SR2_Omi_COM
Cell Control	01	TC00821298	G002	88350	100.73	20220328_SR2_Omi_COM
Cell Control	01	TC00821298	H001	83675	94.95	20220328_SR2_Omi_COM
Cell Control	01	TC00821298	H002	91225	104.29	20220328_SR2_Omi_COM
Cell Control	01	TC00821298	I001	90275	103.11	20220328_SR2_Omi_COM
Cell Control	01	TC00821298	I002	83175	94.33	20220328_SR2_Omi_COM
Cell Control	01	TC00821298	J001	98500	113.29	20220328_SR2_Omi_COM
Cell Control	01	TC00821298	J002	87525	99.71	20220328_SR2_Omi_COM
Cell Control	01	TC00821298	K001	88475	100.89	20220328_SR2_Omi_COM
Cell Control	01	TC00821298	K002	89400	102.03	20220328_SR2_Omi_COM
Cell Control	01	TC00821298	L001	89150	101.72	20220328_SR2_Omi_COM
Cell Control	01	TC00821298	L002	85025	96.62	20220328_SR2_Omi_COM
Cell Control	01	TC00821298	M001	86525	98.47	20220328_SR2_Omi_COM
Cell Control	01	TC00821298	M002	91050	104.07	20220328_SR2_Omi_COM
Cell Control	01	TC00821298	N001	87150	99.25	20220328_SR2_Omi_COM
Cell Control	01	TC00821298	N002	87075	99.15	20220328_SR2_Omi_COM
Cell Control	01	TC00821298	O001	86450	98.38	20220328_SR2_Omi_COM
Cell Control	01	TC00821298	O002	86075	97.92	20220328_SR2_Omi_COM
Cell Control	01	TC00821298	P001	85600	97.33	20220328_SR2_Omi_COM
Cell Control	01	TC00821298	P002	83750	95.04	20220328_SR2_Omi_COM
Virus Control	01	TC00821291	A023	5125	-0.56	20220328_SR2_Omi_COM
Virus Control	01	TC00821291	A024	6625	1.65	20220328_SR2_Omi_COM
Virus Control	01	TC00821291	B023	6325	1.21	20220328_SR2_Omi_COM
Virus Control	01	TC00821291	B024	6500	1.46	20220328_SR2_Omi_COM
Virus Control	01	TC00821291	C023	4400	-1.63	20220328_SR2_Omi_COM
Virus Control	01	TC00821291	C024	6725	1.8	20220328_SR2_Omi_COM
Virus Control	01	TC00821291	D023	5525	0.03	20220328_SR2_Omi_COM
Virus Control	01	TC00821291	D024	4725	-1.15	20220328_SR2_Omi_COM
Virus Control	01	TC00821291	E023	4575	-1.37	20220328_SR2_Omi_COM
Virus Control	01	TC00821291	E024	6475	1.43	20220328_SR2_Omi_COM
Virus Control	01	TC00821291	F023	4700	-1.19	20220328_SR2_Omi_COM
Virus Control	01	TC00821291	F024	6150	0.95	20220328_SR2_Omi_COM
Virus Control	01	TC00821291	G023	4400	-1.63	20220328_SR2_Omi_COM
Virus Control	01	TC00821291	G024	3975	-2.26	20220328_SR2_Omi_COM
Virus Control	01	TC00821291	H023	5025	-0.71	20220328_SR2_Omi_COM
Virus Control	01	TC00821291	H024	3500	-2.96	20220328_SR2_Omi_COM
Virus Control	01	TC00821291	I023	4950	-0.82	20220328_SR2_Omi_COM
Virus Control	01	TC00821291	I024	8300	4.12	20220328_SR2_Omi_COM
Virus Control	01	TC00821291	J023	5050	-0.67	20220328_SR2_Omi_COM
Virus Control	01	TC00821291	J024	4550	-1.41	20220328_SR2_Omi_COM
Virus Control	01	TC00821291	K023	3600	-2.81	20220328_SR2_Omi_COM
Virus Control	01	TC00821291	K024	6850	1.98	20220328_SR2_Omi_COM
Virus Control	01	TC00821291	L023	4025	-2.19	20220328_SR2_Omi_COM
Virus Control	01	TC00821291	L024	10775	7.77	20220328_SR2_Omi_COM
Virus Control	01	TC00821291	M023	4000	-2.22	20220328_SR2_Omi_COM
Virus Control	01	TC00821291	M024	4000	-2.22	20220328_SR2_Omi_COM
Virus Control	01	TC00821291	N023	6300	1.17	20220328_SR2_Omi_COM
Virus Control	01	TC00821291	N024	9525	5.93	20220328_SR2_Omi_COM
Virus Control	01	TC00821291	O023	4725	-1.15	20220328_SR2_Omi_COM
Virus Control	01	TC00821291	O024	6950	2.13	20220328_SR2_Omi_COM
Virus Control	01	TC00821291	P023	3850	-2.44	20220328_SR2_Omi_COM
Virus Control	01	TC00821291	P024	4025	-2.19	20220328_SR2_Omi_COM
Virus Control	01	TC00821292	A023	6050	-0.27	20220328_SR2_Omi_COM
Virus Control	01	TC00821292	A024	6950	0.87	20220328_SR2_Omi_COM
Virus Control	01	TC00821292	B023	6175	-0.11	20220328_SR2_Omi_COM
Virus Control	01	TC00821292	B024	6025	-0.3	20220328_SR2_Omi_COM
Virus Control	01	TC00821292	C023	7475	1.54	20220328_SR2_Omi_COM
Virus Control	01	TC00821292	C024	4825	-1.82	20220328_SR2_Omi_COM
Virus Control	01	TC00821292	D023	4775	-1.88	20220328_SR2_Omi_COM
Virus Control	01	TC00821292	D024	4500	-2.23	20220328_SR2_Omi_COM
Virus Control	01	TC00821292	E023	7725	1.86	20220328_SR2_Omi_COM
Virus Control	01	TC00821292	E024	4725	-1.95	20220328_SR2_Omi_COM
Virus Control	01	TC00821292	F023	7300	1.32	20220328_SR2_Omi_COM
Virus Control	01	TC00821292	F024	9825	4.52	20220328_SR2_Omi_COM
Virus Control	01	TC00821292	G023	5275	-1.25	20220328_SR2_Omi_COM
Virus Control	01	TC00821292	G024	7925	2.11	20220328_SR2_Omi_COM
Virus Control	01	TC00821292	H023	5475	-0.99	20220328_SR2_Omi_COM
Virus Control	01	TC00821292	H024	4375	-2.39	20220328_SR2_Omi_COM
Virus Control	01	TC00821292	I023	8150	2.39	20220328_SR2_Omi_COM
Virus Control	01	TC00821292	I024	9950	4.68	20220328_SR2_Omi_COM
Virus Control	01	TC00821292	J023	6125	-0.17	20220328_SR2_Omi_COM
Virus Control	01	TC00821292	J024	6925	0.84	20220328_SR2_Omi_COM
Virus Control	01	TC00821292	K023	5025	-1.57	20220328_SR2_Omi_COM
Virus Control	01	TC00821292	K024	4950	-1.66	20220328_SR2_Omi_COM
Virus Control	01	TC00821292	L023	6200	-0.08	20220328_SR2_Omi_COM
Virus Control	01	TC00821292	L024	6700	0.56	20220328_SR2_Omi_COM
Virus Control	01	TC00821292	M023	5925	-0.42	20220328_SR2_Omi_COM
Virus Control	01	TC00821292	M024	6225	-0.04	20220328_SR2_Omi_COM
Virus Control	01	TC00821292	N023	5850	-0.52	20220328_SR2_Omi_COM
Virus Control	01	TC00821292	N024	3350	-3.69	20220328_SR2_Omi_COM
Virus Control	01	TC00821292	O023	8800	3.22	20220328_SR2_Omi_COM
Virus Control	01	TC00821292	O024	6225	-0.04	20220328_SR2_Omi_COM
Virus Control	01	TC00821292	P023	6075	-0.23	20220328_SR2_Omi_COM
Virus Control	01	TC00821292	P024	4450	-2.29	20220328_SR2_Omi_COM
Virus Control	01	TC00821294	A023	4775	-0.13	20220328_SR2_Omi_COM
Virus Control	01	TC00821294	A024	5200	0.39	20220328_SR2_Omi_COM
Virus Control	01	TC00821294	B023	4800	-0.1	20220328_SR2_Omi_COM
Virus Control	01	TC00821294	B024	4625	-0.31	20220328_SR2_Omi_COM
Virus Control	01	TC00821294	C023	8300	4.16	20220328_SR2_Omi_COM
Virus Control	01	TC00821294	C024	6825	2.37	20220328_SR2_Omi_COM
Virus Control	01	TC00821294	D023	4375	-0.62	20220328_SR2_Omi_COM
Virus Control	01	TC00821294	D024	3275	-1.95	20220328_SR2_Omi_COM
Virus Control	01	TC00821294	E023	4325	-0.68	20220328_SR2_Omi_COM
Virus Control	01	TC00821294	E024	5700	1	20220328_SR2_Omi_COM
Virus Control	01	TC00821294	F023	5925	1.27	20220328_SR2_Omi_COM
Virus Control	01	TC00821294	F024	4025	-1.04	20220328_SR2_Omi_COM
Virus Control	01	TC00821294	G023	4575	-0.37	20220328_SR2_Omi_COM
Virus Control	01	TC00821294	G024	7075	2.67	20220328_SR2_Omi_COM
Virus Control	01	TC00821294	H023	5175	0.36	20220328_SR2_Omi_COM
Virus Control	01	TC00821294	H024	2950	-2.35	20220328_SR2_Omi_COM
Virus Control	01	TC00821294	I023	5300	0.51	20220328_SR2_Omi_COM
Virus Control	01	TC00821294	I024	4800	-0.1	20220328_SR2_Omi_COM
Virus Control	01	TC00821294	J023	4475	-0.49	20220328_SR2_Omi_COM
Virus Control	01	TC00821294	J024	4875	-0.01	20220328_SR2_Omi_COM
Virus Control	01	TC00821294	K023	4000	-1.07	20220328_SR2_Omi_COM
Virus Control	01	TC00821294	K024	4600	-0.34	20220328_SR2_Omi_COM
Virus Control	01	TC00821294	L023	4050	-1.01	20220328_SR2_Omi_COM
Virus Control	01	TC00821294	L024	4975	0.12	20220328_SR2_Omi_COM
Virus Control	01	TC00821294	M023	3650	-1.5	20220328_SR2_Omi_COM
Virus Control	01	TC00821294	M024	4950	0.08	20220328_SR2_Omi_COM
Virus Control	01	TC00821294	N023	4825	-0.07	20220328_SR2_Omi_COM
Virus Control	01	TC00821294	N024	4700	-0.22	20220328_SR2_Omi_COM
Virus Control	01	TC00821294	O023	2750	-2.59	20220328_SR2_Omi_COM
Virus Control	01	TC00821294	O024	7850	3.62	20220328_SR2_Omi_COM
Virus Control	01	TC00821294	P023	4000	-1.07	20220328_SR2_Omi_COM
Virus Control	01	TC00821294	P024	4450	-0.52	20220328_SR2_Omi_COM
Virus Control	01	TC00821295	A023	7250	-0.06	20220328_SR2_Omi_COM
Virus Control	01	TC00821295	A024	9475	2.75	20220328_SR2_Omi_COM
Virus Control	01	TC00821295	B023	5575	-2.17	20220328_SR2_Omi_COM
Virus Control	01	TC00821295	B024	7200	-0.12	20220328_SR2_Omi_COM
Virus Control	01	TC00821295	C023	9475	2.75	20220328_SR2_Omi_COM
Virus Control	01	TC00821295	C024	4100	-4.03	20220328_SR2_Omi_COM
Virus Control	01	TC00821295	D023	7900	0.76	20220328_SR2_Omi_COM
Virus Control	01	TC00821295	D024	7775	0.61	20220328_SR2_Omi_COM
Virus Control	01	TC00821295	E023	6750	-0.69	20220328_SR2_Omi_COM
Virus Control	01	TC00821295	E024	4475	-3.56	20220328_SR2_Omi_COM
Virus Control	01	TC00821295	F023	5375	-2.42	20220328_SR2_Omi_COM
Virus Control	01	TC00821295	F024	7375	0.1	20220328_SR2_Omi_COM
Virus Control	01	TC00821295	G023	4775	-3.18	20220328_SR2_Omi_COM
Virus Control	01	TC00821295	G024	8575	1.62	20220328_SR2_Omi_COM
Virus Control	01	TC00821295	H023	9400	2.66	20220328_SR2_Omi_COM
Virus Control	01	TC00821295	H024	5700	-2.01	20220328_SR2_Omi_COM
Virus Control	01	TC00821295	I023	7400	0.13	20220328_SR2_Omi_COM
Virus Control	01	TC00821295	I024	6125	-1.48	20220328_SR2_Omi_COM
Virus Control	01	TC00821295	J023	7425	0.16	20220328_SR2_Omi_COM
Virus Control	01	TC00821295	J024	17975	13.48	20220328_SR2_Omi_COM
Virus Control	01	TC00821295	K023	8050	0.95	20220328_SR2_Omi_COM
Virus Control	01	TC00821295	K024	4900	-3.02	20220328_SR2_Omi_COM
Virus Control	01	TC00821295	L023	5425	-2.36	20220328_SR2_Omi_COM
Virus Control	01	TC00821295	L024	5450	-2.33	20220328_SR2_Omi_COM
Virus Control	01	TC00821295	M023	7800	0.64	20220328_SR2_Omi_COM
Virus Control	01	TC00821295	M024	10225	3.7	20220328_SR2_Omi_COM
Virus Control	01	TC00821295	N023	5300	-2.52	20220328_SR2_Omi_COM
Virus Control	01	TC00821295	N024	5625	-2.11	20220328_SR2_Omi_COM
Virus Control	01	TC00821295	O023	5275	-2.55	20220328_SR2_Omi_COM
Virus Control	01	TC00821295	O024	8900	2.03	20220328_SR2_Omi_COM
Virus Control	01	TC00821295	P023	10000	3.42	20220328_SR2_Omi_COM
Virus Control	01	TC00821295	P024	6375	-1.16	20220328_SR2_Omi_COM
Virus Control	01	TC00821297	A023	5675	0	20220328_SR2_Omi_COM
Virus Control	01	TC00821297	A024	4125	-1.91	20220328_SR2_Omi_COM
Virus Control	01	TC00821297	B023	4575	-1.36	20220328_SR2_Omi_COM
Virus Control	01	TC00821297	B024	6275	0.73	20220328_SR2_Omi_COM
Virus Control	01	TC00821297	C023	7150	1.81	20220328_SR2_Omi_COM
Virus Control	01	TC00821297	C024	10200	5.56	20220328_SR2_Omi_COM
Virus Control	01	TC00821297	D023	4825	-1.05	20220328_SR2_Omi_COM
Virus Control	01	TC00821297	D024	4725	-1.17	20220328_SR2_Omi_COM
Virus Control	01	TC00821297	E023	7550	2.3	20220328_SR2_Omi_COM
Virus Control	01	TC00821297	E024	3400	-2.8	20220328_SR2_Omi_COM
Virus Control	01	TC00821297	F023	4625	-1.29	20220328_SR2_Omi_COM
Virus Control	01	TC00821297	F024	6050	0.46	20220328_SR2_Omi_COM
Virus Control	01	TC00821297	G023	7150	1.81	20220328_SR2_Omi_COM
Virus Control	01	TC00821297	G024	7875	2.7	20220328_SR2_Omi_COM
Virus Control	01	TC00821297	H023	5850	0.21	20220328_SR2_Omi_COM
Virus Control	01	TC00821297	H024	5475	-0.25	20220328_SR2_Omi_COM
Virus Control	01	TC00821297	I023	7075	1.72	20220328_SR2_Omi_COM
Virus Control	01	TC00821297	I024	6375	0.86	20220328_SR2_Omi_COM
Virus Control	01	TC00821297	J023	5350	-0.4	20220328_SR2_Omi_COM
Virus Control	01	TC00821297	J024	4150	-1.88	20220328_SR2_Omi_COM
Virus Control	01	TC00821297	K023	5475	-0.25	20220328_SR2_Omi_COM
Virus Control	01	TC00821297	K024	3150	-3.11	20220328_SR2_Omi_COM
Virus Control	01	TC00821297	L023	4675	-1.23	20220328_SR2_Omi_COM
Virus Control	01	TC00821297	L024	4850	-1.02	20220328_SR2_Omi_COM
Virus Control	01	TC00821297	M023	3375	-2.83	20220328_SR2_Omi_COM
Virus Control	01	TC00821297	M024	3525	-2.65	20220328_SR2_Omi_COM
Virus Control	01	TC00821297	N023	5225	-0.56	20220328_SR2_Omi_COM
Virus Control	01	TC00821297	N024	8800	3.84	20220328_SR2_Omi_COM
Virus Control	01	TC00821297	O023	5025	-0.8	20220328_SR2_Omi_COM
Virus Control	01	TC00821297	O024	4900	-0.96	20220328_SR2_Omi_COM
Virus Control	01	TC00821297	P023	6375	0.86	20220328_SR2_Omi_COM
Virus Control	01	TC00821297	P024	7825	2.64	20220328_SR2_Omi_COM
Virus Control	01	TC00821298	A023	3650	-4.06	20220328_SR2_Omi_COM
Virus Control	01	TC00821298	A024	6925	0	20220328_SR2_Omi_COM
Virus Control	01	TC00821298	B023	7000	0.09	20220328_SR2_Omi_COM
Virus Control	01	TC00821298	B024	4625	-2.85	20220328_SR2_Omi_COM
Virus Control	01	TC00821298	C023	8350	1.76	20220328_SR2_Omi_COM
Virus Control	01	TC00821298	C024	3750	-3.93	20220328_SR2_Omi_COM
Virus Control	01	TC00821298	D023	5875	-1.3	20220328_SR2_Omi_COM
Virus Control	01	TC00821298	D024	7725	0.99	20220328_SR2_Omi_COM
Virus Control	01	TC00821298	E023	8850	2.38	20220328_SR2_Omi_COM
Virus Control	01	TC00821298	E024	7975	1.3	20220328_SR2_Omi_COM
Virus Control	01	TC00821298	F023	5525	-1.74	20220328_SR2_Omi_COM
Virus Control	01	TC00821298	F024	5425	-1.86	20220328_SR2_Omi_COM
Virus Control	01	TC00821298	G023	7200	0.34	20220328_SR2_Omi_COM
Virus Control	01	TC00821298	G024	6600	-0.41	20220328_SR2_Omi_COM
Virus Control	01	TC00821298	H023	7250	0.4	20220328_SR2_Omi_COM
Virus Control	01	TC00821298	H024	10600	4.54	20220328_SR2_Omi_COM
Virus Control	01	TC00821298	I023	8700	2.19	20220328_SR2_Omi_COM
Virus Control	01	TC00821298	I024	5050	-2.32	20220328_SR2_Omi_COM
Virus Control	01	TC00821298	J023	6825	-0.13	20220328_SR2_Omi_COM
Virus Control	01	TC00821298	J024	6625	-0.38	20220328_SR2_Omi_COM
Virus Control	01	TC00821298	K023	8275	1.67	20220328_SR2_Omi_COM
Virus Control	01	TC00821298	K024	12500	6.89	20220328_SR2_Omi_COM
Virus Control	01	TC00821298	L023	7475	0.68	20220328_SR2_Omi_COM
Virus Control	01	TC00821298	L024	5150	-2.2	20220328_SR2_Omi_COM
Virus Control	01	TC00821298	M023	3700	-3.99	20220328_SR2_Omi_COM
Virus Control	01	TC00821298	M024	7050	0.15	20220328_SR2_Omi_COM
Virus Control	01	TC00821298	N023	10550	4.48	20220328_SR2_Omi_COM
Virus Control	01	TC00821298	N024	5300	-2.01	20220328_SR2_Omi_COM
Virus Control	01	TC00821298	O023	5875	-1.3	20220328_SR2_Omi_COM
Virus Control	01	TC00821298	O024	8975	2.53	20220328_SR2_Omi_COM
Virus Control	01	TC00821298	P023	6800	-0.16	20220328_SR2_Omi_COM
Virus Control	01	TC00821298	P024	5525	-1.74	20220328_SR2_Omi_COM

## Sheet: Batch Ctrl
Plate	Z Analysis	Avg Cell Ctrl	StDev Cell Ctrl	CV Cell Ctrl	Avg Virus Ctrl	StDev Virus Ctrl	CV Virus Ctrl	Testset ID
TC00821291	0.81	73305.6	2694	3.68	5507.03	1710	31.05	20220328_SR2_Omi_COM
TC00821292	0.85	85175.8	2380	2.79	6260.16	1558	24.88	20220328_SR2_Omi_COM
TC00821294	0.86	87025	2548	2.93	4880.47	1242	25.44	20220328_SR2_Omi_COM
TC00821295	0.82	86513.3	2166	2.5	7294.53	2598	35.62	20220328_SR2_Omi_COM
TC00821297	0.86	87011.7	2168	2.49	5677.34	1649	29.04	20220328_SR2_Omi_COM
TC00821298	0.81	87758.6	3088	3.52	6928.12	2042	29.48	20220328_SR2_Omi_COM

## Sheet: Notes
	Abase testset ID:	20220328_SR2_Omi_COM
