# Supplementary material for: AI Designed, Mutation Resistant Broad Neutralizing Antibodies Against Multiple SARS-CoV-2 Strains
Source: Research Square preprint supplement (doi:10.21203/rs.3.rs-5184292/v1), 2025-03-27
Supplement: Supplementary file 34 [file S5b_2022-0328_SARS2_Omi_Ainnocence_TOX_Report.xlsx]

## Sheet: Cmpds DR Graphs
Compound ID	Batch	Library	Supplier	Supplier Id	CC50 (ug/mL)	Graph	Activity Status	Min % Viability	Conc @ Min % Viability	Max % Viability	Conc @ Max % Viability	Number Included Points
AB01974161	01	Ainno_16251	Ainnocence	AIN2-1_REGN10933	>10.00		Inactive	97.05	0.00316	103.06	0.1	10
AB01974162	01	Ainno_16251	Ainnocence	AIN2-2_REGN10987	>10.00		Inactive	93.15	3.16	101.29	0.0316	10
AB01974163	01	Ainno_16251	Ainnocence	AIN1-3_AINNL0003	>11.67		Inactive	96.28	0.037	108.15	0.117	10
AB01974164	01	Ainno_16251	Ainnocence	AIN1-5_AINNL0005	>11.78		Inactive	94.14	0.00118	104.81	0.00373	10
AB01974165	01	Ainno_16251	Ainnocence	AIN1-6_AINNL0006	>11.78		Inactive	94.41	0.0118	100.54	3.73	10
AB01974166	01	Ainno_16251	Ainnocence	AIN1-7_AINNL0007	>11.78		Inactive	96.09	3.73	100.91	0.000373	10
AB01974167	01	Ainno_16251	Ainnocence	AIN1-8_AINNL0008	>11.78		Inactive	93.87	0.000373	103.43	11.78	10
AB01974168	01	Ainno_16251	Ainnocence	AIN1-9_AINNL0009	>12.33		Inactive	95.31	0.00389	102.47	0.000389	10
AB01974169	01	Ainno_16251	Ainnocence	AIN1-10_AINNL0010	>11.67		Inactive	91.64	0.037	102.77	3.69	10
AB01974170	01	Ainno_16251	Ainnocence	AIN1-18_AINNL0018	>11.22		Inactive	95.52	0.354	104.6	0.000354	10
AB01974171	01	Ainno_16251	Ainnocence	AIN1-21_AINNL0021	>11.00		Inactive	89.45	1.1	100.94	3.48	10
AB01974172	01	Ainno_16251	Ainnocence	AIN1-22_AINNL0022	>10.22		Inactive	96.09	0.102	103.64	0.00323	10
AB01974173	01	Ainno_16251	Ainnocence	AIN1-26_AINNL0026	>10.89		Inactive	92.34	0.000345	104.75	0.345	10
AB01974174	01	Ainno_16251	Ainnocence	AIN1-28_AINNL0028	>9.67		Inactive	95.52	0.00306	105.84	0.0968	10
AB01974175	01	Ainno_16251	Ainnocence	AIN1-29_AINNL0029	>10.00		Inactive	96.03	0.01	102.68	0.1	10
AB01974176	01	Ainno_16251	Ainnocence	AIN1-30_AINNL0030	>8.67		Inactive	95.88	2.74	105.48	0.00867	10
AB01974177	01	Ainno_16251	Ainnocence	AIN1-31_AINNL0031	>9.78		Inactive	98.44	0.309	108.45	0.000309	10
AB01974178	01	Ainno_16251	Ainnocence	AIN1-32_AINNL0032	>10.22		Inactive	98.44	10.22	106.23	0.0323	10
AB01974179	01	Ainno_16251	Ainnocence	AIN1-33_AINNL0033	>10.67		Inactive	99.7	0.00339	105.66	0.107	10
AB01974180	01	Ainno_16251	Ainnocence	AIN1-36_AINNL0036	>9.44		Inactive	97	9.44	103.46	0.00299	10
AB01974181	01	Ainno_16251	Ainnocence	AIN1-1_AINNL0001	>11.00		Inactive	89.48	1.1	100.03	0.011	10
AB01974183	01	Ainno_16251	Ainnocence	AIN1-2_AINNL0002	>4.78		Inactive	91.86	4.78	102.23	0.000151	10
AB01974184	01	Ainno_16251	Ainnocence	AIN1-4_AINNL0004	>5.67		Inactive	96.06	0.000566	103.73	0.000179	10
AB01974185	01	Ainno_16251	Ainnocence	AIN1-13_AINNL0013	>10.67		Inactive	93	0.0107	99.01	10.67	10
AB01974186	01	Ainno_16251	Ainnocence	AIN1-15_AINNL0015	>10.78		Inactive	95.04	0.342	102.95	3.41	10
AB01974187	01	Ainno_16251	Ainnocence	AIN1-38_AINNL0038	>10.89		Inactive	91.28	0.345	100.94	3.45	10
AB01974188	01	Ainno_16251	Ainnocence	AIN1-39_AINNL0039	>10.67		Inactive	96.55	3.38	103.49	0.000339	10
AB01974189	01	Ainno_16251	Ainnocence	AIN1-40_AINNL0040	>10.78		Inactive	94.08	0.00342	101.99	0.108	10
AB01974190	01	Ainno_16251	Ainnocence	AIN1-41_AINNL0041	>10.89		Inactive	96.82	0.000345	104.06	10.89	10
AB01974191	01	Ainno_16251	Ainnocence	AIN1-42_AINNL0042	>10.89		Inactive	93.75	10.89	102.77	3.45	10
AB01974192	01	Ainno_16251	Ainnocence	AIN1-11_AINNL0011	>5.44		Inactive	95.91	0.000544	103.94	0.544	10
AB01974193	01	Ainno_16251	Ainnocence	AIN1-14_AINNL0014	>11.89		Inactive	95.85	0.0377	103.22	1.19	10
AB01974194	01	Ainno_16251	Ainnocence	AIN1-17_AINNL0017	>11.78		Inactive	96.76	0.00118	105.51	0.118	10
AB01974195	01	Ainno_16251	Ainnocence	AIN1-12_AINNL0012	>41.22		Inactive	91.44	41.22	101.89	0.0411	10
AB01974196	01	Ainno_16251	Ainnocence	AIN1-20_AINNL0020	>45.22		Inactive	96.02	0.00143	101.12	45.22	10
AB01974197	01	Ainno_16251	Ainnocence	AIN1-23_AINNL0023	>3.44		Inactive	94.4	0.000109	104.97	0.0109	10
AB01974198	01	Ainno_16251	Ainnocence	AIN1-19_AINNL0019	>11.67		Inactive	96.11	1.17	105.59	0.00117	10
AB01974199	01	Ainno_16251	Ainnocence	AIN1-24_AINNL0024	>12.11		Inactive	94.71	0.0121	102.55	0.121	10
AB01974200	01	Ainno_16251	Ainnocence	AIN1-25_AINNL0025	>7.67		Inactive	94.88	0.00769	104.85	7.67	10
AB01974201	01	Ainno_16251	Ainnocence	AIN1-27_AINNL0027	>1.44		Inactive	95.51	0.144	102.97	0.0144	10
AB01974202	01	Ainno_16251	Ainnocence	AIN1-34_AINNL0034	>2.56		Inactive	98.5	0.256	102.26	8.1e-05	10
AB01974203	01	Ainno_16251	Ainnocence	AIN1-35_AINNL0035	>2.33		Inactive	94.54	0.737	102.86	2.33	10
AB01974204	01	Ainno_16251	Ainnocence	AIN1-37_AINNL0037	>2.11		Inactive	96.14	2.11	106.76	0.668	10
AB01974205	01	Ainno_16251	Ainnocence	AIN1-43_AINNL0043	>12.33		Inactive	95.97	0.00389	104	12.33	10
AB01974206	01	Ainno_16251	Ainnocence	AIN1-44_AINNL0044	>11.44		Inactive	94.71	0.00115	107.53	3.62	10
AB01974207	01	Ainno_16251	Ainnocence	AIN1-45_AINNL0045	>11.44		Inactive	97.48	0.000364	105.82	0.00364	10
AB01974208	01	Ainno_16251	Ainnocence	AIN1-46_AINNL0046	>13.11		Inactive	94.8	0.415	107.24	0.0131	10
AB01974209	01	Ainno_16251	Ainnocence	AIN1-47_AINNL0047	>24.78		Inactive	96.82	0.248	104.34	0.00785	10
AB01974210	01	Ainno_16251	Ainnocence	AIN1-48_AINNL0048	>11.00		Inactive	96.59	0.348	102.72	0.11	10
AB01974211	01	Ainno_16251	Ainnocence	AIN1-49_AINNL0049	>11.22		Inactive	91.5	0.0112	103.54	3.55	10
AB01974212	01	Ainno_16251	Ainnocence	AIN1-50_AINNL0050	>11.22		Inactive	94.8	0.00354	102.35	3.55	10
AB01974213	01	Ainno_16251	Ainnocence	AIN1-16_AINNL0016	>11.44		Inactive	93.09	0.00115	103.2	0.115	10
AB01974587	01	Ainno_16335	Ainnocence	22AIN4-1	>11.00		Inactive	97.97	0.00348	105.77	0.348	10
AB01974588	01	Ainno_16335	Ainnocence	22AIN4-2	>12.11		Inactive	98.57	0.383	104.54	0.0121	10
AB01974589	01	Ainno_16335	Ainnocence	22AIN4-3	>10.89		Inactive	97.42	3.45	108.88	0.0109	10
AB01974590	01	Ainno_16335	Ainnocence	22AIN4-4	>11.33		Inactive	99.26	0.361	109.32	0.00114	10
AB01974591	01	Ainno_16335	Ainnocence	22AIN4-5	>11.22		Inactive	99.15	0.000354	111.27	0.0112	10
AB01974592	01	Ainno_16335	Ainnocence	22AIN4-6	>11.78		Inactive	92.9	0.0118	105.2	0.0373	10
AB01974593	01	Ainno_16335	Ainnocence	22AIN4-7	>11.78		Inactive	96.1	11.78	118.1	0.0118	10
AB01974594	01	Ainno_16335	Ainnocence	22AIN4-8	>11.22		Inactive	100.45	11.22	108.68	0.0112	10
AB01974595	01	Ainno_16335	Ainnocence	22AIN4-9	>11.11		Inactive	100.39	0.0111	111.36	0.00351	10
AB01974596	01	Ainno_16335	Ainnocence	22AIN4-10	>12.67		Inactive	99.75	0.0402	104.77	0.000402	10
AB01974597	01	Ainno_16335	Ainnocence	22AIN4-11	>11.00		Inactive	100.62	0.011	106.9	0.11	10
AB01974598	01	Ainno_16335	Ainnocence	22AIN4-12	>11.00		Inactive	99.73	0.11	107.33	0.00348	10
AB01974599	01	Ainno_16335	Ainnocence	22AIN4-13	>11.11		Inactive	99.81	0.00351	107.1	0.0111	10
AB01974600	01	Ainno_16335	Ainnocence	22AIN4-14	>10.78		Inactive	98.86	0.00342	113.23	10.78	10
AB01974601	01	Ainno_16335	Ainnocence	22AIN4-15	>11.56		Inactive	99.38	1.16	110.53	0.000367	10
AB01974602	01	Ainno_16335	Ainnocence	22AIN4-16	>11.11		Inactive	96.47	3.52	106.7	0.000351	10
AB01974603	01	Ainno_16335	Ainnocence	22AIN4-17	>11.44		Inactive	97.28	0.000364	104.68	0.115	10
AB01974604	01	Ainno_16335	Ainnocence	22AIN4-18	>11.56		Inactive	100.07	11.56	111.62	3.66	10
AB01974605	01	Ainno_16335	Ainnocence	22AIN4-19	>13.56		Inactive	97.48	4.29	105.6	0.0136	10
AB01974606	01	Ainno_16335	Ainnocence	22AIN4-20	>11.33		Inactive	98.14	0.000361	109.23	0.00361	10

## Sheet: Cmpds DR Data
Compound ID	Batch	Library ID	Supplier	Supplier ID	Supplier Batch	Plate ID	Well Ref	Assay Conc	Assay Conc Unit	Lum	% Viability	CC50 (ug/mL)	Activity Status	Curve Fit Hill Slope	Curve Fit Norm Chi2	Curve Fit StDev	Number Included Points	Test ID
AB01974163	01	Ainno_16251	Ainnocence	AIN1-3_AINNL0003	Lot# MB15NO4103	TC00821293	A003	11.67	ug/ml	84350	101.24	>11.67	Inactive	20.8			10	20220328_SR2OmToxCOM
AB01974163	01	Ainno_16251	Ainnocence	AIN1-3_AINNL0003	Lot# MB15NO4103	TC00821293	A004	3.69	ug/ml	85850	103.04							20220328_SR2OmToxCOM
AB01974163	01	Ainno_16251	Ainnocence	AIN1-3_AINNL0003	Lot# MB15NO4103	TC00821293	A005	1.17	ug/ml	87150	104.6							20220328_SR2OmToxCOM
AB01974163	01	Ainno_16251	Ainnocence	AIN1-3_AINNL0003	Lot# MB15NO4103	TC00821293	A006	0.37	ug/ml	85850	103.04							20220328_SR2OmToxCOM
AB01974163	01	Ainno_16251	Ainnocence	AIN1-3_AINNL0003	Lot# MB15NO4103	TC00821293	A007	0.117	ug/ml	90100	108.15							20220328_SR2OmToxCOM
AB01974163	01	Ainno_16251	Ainnocence	AIN1-3_AINNL0003	Lot# MB15NO4103	TC00821293	A008	0.037	ug/ml	80225	96.28							20220328_SR2OmToxCOM
AB01974163	01	Ainno_16251	Ainnocence	AIN1-3_AINNL0003	Lot# MB15NO4103	TC00821293	A009	0.0117	ug/ml	88325	106.02							20220328_SR2OmToxCOM
AB01974163	01	Ainno_16251	Ainnocence	AIN1-3_AINNL0003	Lot# MB15NO4103	TC00821293	A010	0.0037	ug/ml	82575	99.1							20220328_SR2OmToxCOM
AB01974163	01	Ainno_16251	Ainnocence	AIN1-3_AINNL0003	Lot# MB15NO4103	TC00821293	A011	0.00117	ug/ml	85625	102.77							20220328_SR2OmToxCOM
AB01974163	01	Ainno_16251	Ainnocence	AIN1-3_AINNL0003	Lot# MB15NO4103	TC00821293	A012	0.00037	ug/ml	84975	101.99							20220328_SR2OmToxCOM
AB01974179	01	Ainno_16251	Ainnocence	AIN1-33_AINNL0033	Lot# MB15NO4133	TC00821293	A013	10.67	ug/ml	84500	101.42	>10.67	Inactive	3.78			10	20220328_SR2OmToxCOM
AB01974179	01	Ainno_16251	Ainnocence	AIN1-33_AINNL0033	Lot# MB15NO4133	TC00821293	A014	3.38	ug/ml	85350	102.44							20220328_SR2OmToxCOM
AB01974179	01	Ainno_16251	Ainnocence	AIN1-33_AINNL0033	Lot# MB15NO4133	TC00821293	A015	1.07	ug/ml	85700	102.86							20220328_SR2OmToxCOM
AB01974179	01	Ainno_16251	Ainnocence	AIN1-33_AINNL0033	Lot# MB15NO4133	TC00821293	A016	0.339	ug/ml	86675	104.03							20220328_SR2OmToxCOM
AB01974179	01	Ainno_16251	Ainnocence	AIN1-33_AINNL0033	Lot# MB15NO4133	TC00821293	A017	0.107	ug/ml	88025	105.66							20220328_SR2OmToxCOM
AB01974179	01	Ainno_16251	Ainnocence	AIN1-33_AINNL0033	Lot# MB15NO4133	TC00821293	A018	0.0339	ug/ml	84200	101.06							20220328_SR2OmToxCOM
AB01974179	01	Ainno_16251	Ainnocence	AIN1-33_AINNL0033	Lot# MB15NO4133	TC00821293	A019	0.0107	ug/ml	87800	105.39							20220328_SR2OmToxCOM
AB01974179	01	Ainno_16251	Ainnocence	AIN1-33_AINNL0033	Lot# MB15NO4133	TC00821293	A020	0.00339	ug/ml	83075	99.7							20220328_SR2OmToxCOM
AB01974179	01	Ainno_16251	Ainnocence	AIN1-33_AINNL0033	Lot# MB15NO4133	TC00821293	A021	0.00107	ug/ml	84250	101.12							20220328_SR2OmToxCOM
AB01974179	01	Ainno_16251	Ainnocence	AIN1-33_AINNL0033	Lot# MB15NO4133	TC00821293	A022	0.000339	ug/ml	85225	102.29							20220328_SR2OmToxCOM
AB01974164	01	Ainno_16251	Ainnocence	AIN1-5_AINNL0005	Lot# MB15NO4105	TC00821293	B003	11.78	ug/ml	82200	98.65	>11.78	Inactive	0.99			10	20220328_SR2OmToxCOM
AB01974164	01	Ainno_16251	Ainnocence	AIN1-5_AINNL0005	Lot# MB15NO4105	TC00821293	B004	3.73	ug/ml	84325	101.21							20220328_SR2OmToxCOM
AB01974164	01	Ainno_16251	Ainnocence	AIN1-5_AINNL0005	Lot# MB15NO4105	TC00821293	B005	1.18	ug/ml	80700	96.85							20220328_SR2OmToxCOM
AB01974164	01	Ainno_16251	Ainnocence	AIN1-5_AINNL0005	Lot# MB15NO4105	TC00821293	B006	0.373	ug/ml	83825	100.61							20220328_SR2OmToxCOM
AB01974164	01	Ainno_16251	Ainnocence	AIN1-5_AINNL0005	Lot# MB15NO4105	TC00821293	B007	0.118	ug/ml	82950	99.55							20220328_SR2OmToxCOM
AB01974164	01	Ainno_16251	Ainnocence	AIN1-5_AINNL0005	Lot# MB15NO4105	TC00821293	B008	0.0373	ug/ml	85275	102.35							20220328_SR2OmToxCOM
AB01974164	01	Ainno_16251	Ainnocence	AIN1-5_AINNL0005	Lot# MB15NO4105	TC00821293	B009	0.0118	ug/ml	85325	102.41							20220328_SR2OmToxCOM
AB01974164	01	Ainno_16251	Ainnocence	AIN1-5_AINNL0005	Lot# MB15NO4105	TC00821293	B010	0.00373	ug/ml	87325	104.81							20220328_SR2OmToxCOM
AB01974164	01	Ainno_16251	Ainnocence	AIN1-5_AINNL0005	Lot# MB15NO4105	TC00821293	B011	0.00118	ug/ml	78450	94.14							20220328_SR2OmToxCOM
AB01974164	01	Ainno_16251	Ainnocence	AIN1-5_AINNL0005	Lot# MB15NO4105	TC00821293	B012	0.000373	ug/ml	80325	96.4							20220328_SR2OmToxCOM
AB01974180	01	Ainno_16251	Ainnocence	AIN1-36_AINNL0036	Lot# MB15NO4136	TC00821293	B013	9.44	ug/ml	80825	97	>9.44	Inactive	0.23			10	20220328_SR2OmToxCOM
AB01974180	01	Ainno_16251	Ainnocence	AIN1-36_AINNL0036	Lot# MB15NO4136	TC00821293	B014	2.99	ug/ml	84150	101							20220328_SR2OmToxCOM
AB01974180	01	Ainno_16251	Ainnocence	AIN1-36_AINNL0036	Lot# MB15NO4136	TC00821293	B015	0.946	ug/ml	82500	99.01							20220328_SR2OmToxCOM
AB01974180	01	Ainno_16251	Ainnocence	AIN1-36_AINNL0036	Lot# MB15NO4136	TC00821293	B016	0.299	ug/ml	82500	99.01							20220328_SR2OmToxCOM
AB01974180	01	Ainno_16251	Ainnocence	AIN1-36_AINNL0036	Lot# MB15NO4136	TC00821293	B017	0.0946	ug/ml	84400	101.3							20220328_SR2OmToxCOM
AB01974180	01	Ainno_16251	Ainnocence	AIN1-36_AINNL0036	Lot# MB15NO4136	TC00821293	B018	0.0299	ug/ml	84175	101.03							20220328_SR2OmToxCOM
AB01974180	01	Ainno_16251	Ainnocence	AIN1-36_AINNL0036	Lot# MB15NO4136	TC00821293	B019	0.00946	ug/ml	82600	99.13							20220328_SR2OmToxCOM
AB01974180	01	Ainno_16251	Ainnocence	AIN1-36_AINNL0036	Lot# MB15NO4136	TC00821293	B020	0.00299	ug/ml	86200	103.46							20220328_SR2OmToxCOM
AB01974180	01	Ainno_16251	Ainnocence	AIN1-36_AINNL0036	Lot# MB15NO4136	TC00821293	B021	0.000946	ug/ml	84775	101.75							20220328_SR2OmToxCOM
AB01974180	01	Ainno_16251	Ainnocence	AIN1-36_AINNL0036	Lot# MB15NO4136	TC00821293	B022	0.000299	ug/ml	85775	102.95							20220328_SR2OmToxCOM
AB01974165	01	Ainno_16251	Ainnocence	AIN1-6_AINNL0006	Lot# MB15NO4106	TC00821293	C003	11.78	ug/ml	80450	96.55	>11.78	Inactive	0.17			10	20220328_SR2OmToxCOM
AB01974165	01	Ainno_16251	Ainnocence	AIN1-6_AINNL0006	Lot# MB15NO4106	TC00821293	C004	3.73	ug/ml	83775	100.54							20220328_SR2OmToxCOM
AB01974165	01	Ainno_16251	Ainnocence	AIN1-6_AINNL0006	Lot# MB15NO4106	TC00821293	C005	1.18	ug/ml	80525	96.64							20220328_SR2OmToxCOM
AB01974165	01	Ainno_16251	Ainnocence	AIN1-6_AINNL0006	Lot# MB15NO4106	TC00821293	C006	0.373	ug/ml	79925	95.91							20220328_SR2OmToxCOM
AB01974165	01	Ainno_16251	Ainnocence	AIN1-6_AINNL0006	Lot# MB15NO4106	TC00821293	C007	0.118	ug/ml	83500	100.21							20220328_SR2OmToxCOM
AB01974165	01	Ainno_16251	Ainnocence	AIN1-6_AINNL0006	Lot# MB15NO4106	TC00821293	C008	0.0373	ug/ml	81675	98.02							20220328_SR2OmToxCOM
AB01974165	01	Ainno_16251	Ainnocence	AIN1-6_AINNL0006	Lot# MB15NO4106	TC00821293	C009	0.0118	ug/ml	78675	94.41							20220328_SR2OmToxCOM
AB01974165	01	Ainno_16251	Ainnocence	AIN1-6_AINNL0006	Lot# MB15NO4106	TC00821293	C010	0.00373	ug/ml	82275	98.74							20220328_SR2OmToxCOM
AB01974165	01	Ainno_16251	Ainnocence	AIN1-6_AINNL0006	Lot# MB15NO4106	TC00821293	C011	0.00118	ug/ml	79300	95.16							20220328_SR2OmToxCOM
AB01974165	01	Ainno_16251	Ainnocence	AIN1-6_AINNL0006	Lot# MB15NO4106	TC00821293	C012	0.000373	ug/ml	81025	97.24							20220328_SR2OmToxCOM
AB01974181	01	Ainno_16251	Ainnocence	AIN1-1_AINNL0001	Lot# MB15NO4101	TC00821293	C013	11	ug/ml	81000	97.21	>11.00	Inactive	0.51			10	20220328_SR2OmToxCOM
AB01974181	01	Ainno_16251	Ainnocence	AIN1-1_AINNL0001	Lot# MB15NO4101	TC00821293	C014	3.48	ug/ml	81500	97.81							20220328_SR2OmToxCOM
AB01974181	01	Ainno_16251	Ainnocence	AIN1-1_AINNL0001	Lot# MB15NO4101	TC00821293	C015	1.1	ug/ml	74575	89.48							20220328_SR2OmToxCOM
AB01974181	01	Ainno_16251	Ainnocence	AIN1-1_AINNL0001	Lot# MB15NO4101	TC00821293	C016	0.348	ug/ml	81275	97.54							20220328_SR2OmToxCOM
AB01974181	01	Ainno_16251	Ainnocence	AIN1-1_AINNL0001	Lot# MB15NO4101	TC00821293	C017	0.11	ug/ml	82525	99.04							20220328_SR2OmToxCOM
AB01974181	01	Ainno_16251	Ainnocence	AIN1-1_AINNL0001	Lot# MB15NO4101	TC00821293	C018	0.0348	ug/ml	75800	90.95							20220328_SR2OmToxCOM
AB01974181	01	Ainno_16251	Ainnocence	AIN1-1_AINNL0001	Lot# MB15NO4101	TC00821293	C019	0.011	ug/ml	83350	100.03							20220328_SR2OmToxCOM
AB01974181	01	Ainno_16251	Ainnocence	AIN1-1_AINNL0001	Lot# MB15NO4101	TC00821293	C020	0.00348	ug/ml	77750	93.3							20220328_SR2OmToxCOM
AB01974181	01	Ainno_16251	Ainnocence	AIN1-1_AINNL0001	Lot# MB15NO4101	TC00821293	C021	0.0011	ug/ml	80275	96.34							20220328_SR2OmToxCOM
AB01974181	01	Ainno_16251	Ainnocence	AIN1-1_AINNL0001	Lot# MB15NO4101	TC00821293	C022	0.000348	ug/ml	79700	95.64							20220328_SR2OmToxCOM
AB01974166	01	Ainno_16251	Ainnocence	AIN1-7_AINNL0007	Lot# MB15NO4107	TC00821293	D003	11.78	ug/ml	82850	99.43	>11.78	Inactive	0.1			10	20220328_SR2OmToxCOM
AB01974166	01	Ainno_16251	Ainnocence	AIN1-7_AINNL0007	Lot# MB15NO4107	TC00821293	D004	3.73	ug/ml	80075	96.09							20220328_SR2OmToxCOM
AB01974166	01	Ainno_16251	Ainnocence	AIN1-7_AINNL0007	Lot# MB15NO4107	TC00821293	D005	1.18	ug/ml	82775	99.34							20220328_SR2OmToxCOM
AB01974166	01	Ainno_16251	Ainnocence	AIN1-7_AINNL0007	Lot# MB15NO4107	TC00821293	D006	0.373	ug/ml	81275	97.54							20220328_SR2OmToxCOM
AB01974166	01	Ainno_16251	Ainnocence	AIN1-7_AINNL0007	Lot# MB15NO4107	TC00821293	D007	0.118	ug/ml	81325	97.6							20220328_SR2OmToxCOM
AB01974166	01	Ainno_16251	Ainnocence	AIN1-7_AINNL0007	Lot# MB15NO4107	TC00821293	D008	0.0373	ug/ml	81875	98.26							20220328_SR2OmToxCOM
AB01974166	01	Ainno_16251	Ainnocence	AIN1-7_AINNL0007	Lot# MB15NO4107	TC00821293	D009	0.0118	ug/ml	83900	100.7							20220328_SR2OmToxCOM
AB01974166	01	Ainno_16251	Ainnocence	AIN1-7_AINNL0007	Lot# MB15NO4107	TC00821293	D010	0.00373	ug/ml	81275	97.54							20220328_SR2OmToxCOM
AB01974166	01	Ainno_16251	Ainnocence	AIN1-7_AINNL0007	Lot# MB15NO4107	TC00821293	D011	0.00118	ug/ml	82900	99.49							20220328_SR2OmToxCOM
AB01974166	01	Ainno_16251	Ainnocence	AIN1-7_AINNL0007	Lot# MB15NO4107	TC00821293	D012	0.000373	ug/ml	84075	100.91							20220328_SR2OmToxCOM
AB01974167	01	Ainno_16251	Ainnocence	AIN1-8_AINNL0008	Lot# MB15NO4108	TC00821293	E003	11.78	ug/ml	86175	103.43	>11.78	Inactive	0.26			10	20220328_SR2OmToxCOM
AB01974167	01	Ainno_16251	Ainnocence	AIN1-8_AINNL0008	Lot# MB15NO4108	TC00821293	E004	3.73	ug/ml	81425	97.72							20220328_SR2OmToxCOM
AB01974167	01	Ainno_16251	Ainnocence	AIN1-8_AINNL0008	Lot# MB15NO4108	TC00821293	E005	1.18	ug/ml	83175	99.82							20220328_SR2OmToxCOM
AB01974167	01	Ainno_16251	Ainnocence	AIN1-8_AINNL0008	Lot# MB15NO4108	TC00821293	E006	0.373	ug/ml	79275	95.13							20220328_SR2OmToxCOM
AB01974167	01	Ainno_16251	Ainnocence	AIN1-8_AINNL0008	Lot# MB15NO4108	TC00821293	E007	0.118	ug/ml	82500	99.01							20220328_SR2OmToxCOM
AB01974167	01	Ainno_16251	Ainnocence	AIN1-8_AINNL0008	Lot# MB15NO4108	TC00821293	E008	0.0373	ug/ml	81750	98.11							20220328_SR2OmToxCOM
AB01974167	01	Ainno_16251	Ainnocence	AIN1-8_AINNL0008	Lot# MB15NO4108	TC00821293	E009	0.0118	ug/ml	82775	99.34							20220328_SR2OmToxCOM
AB01974167	01	Ainno_16251	Ainnocence	AIN1-8_AINNL0008	Lot# MB15NO4108	TC00821293	E010	0.00373	ug/ml	81550	97.87							20220328_SR2OmToxCOM
AB01974167	01	Ainno_16251	Ainnocence	AIN1-8_AINNL0008	Lot# MB15NO4108	TC00821293	E011	0.00118	ug/ml	82550	99.07							20220328_SR2OmToxCOM
AB01974167	01	Ainno_16251	Ainnocence	AIN1-8_AINNL0008	Lot# MB15NO4108	TC00821293	E012	0.000373	ug/ml	78225	93.87							20220328_SR2OmToxCOM
AB01974183	01	Ainno_16251	Ainnocence	AIN1-2_AINNL0002	Lot# MB15NO2511	TC00821293	E013	4.78	ug/ml	76550	91.86	>4.78	Inactive	0.08			10	20220328_SR2OmToxCOM
AB01974183	01	Ainno_16251	Ainnocence	AIN1-2_AINNL0002	Lot# MB15NO2511	TC00821293	E014	1.51	ug/ml	80925	97.12							20220328_SR2OmToxCOM
AB01974183	01	Ainno_16251	Ainnocence	AIN1-2_AINNL0002	Lot# MB15NO2511	TC00821293	E015	0.478	ug/ml	82325	98.8							20220328_SR2OmToxCOM
AB01974183	01	Ainno_16251	Ainnocence	AIN1-2_AINNL0002	Lot# MB15NO2511	TC00821293	E016	0.151	ug/ml	81125	97.36							20220328_SR2OmToxCOM
AB01974183	01	Ainno_16251	Ainnocence	AIN1-2_AINNL0002	Lot# MB15NO2511	TC00821293	E017	0.0478	ug/ml	78900	94.68							20220328_SR2OmToxCOM
AB01974183	01	Ainno_16251	Ainnocence	AIN1-2_AINNL0002	Lot# MB15NO2511	TC00821293	E018	0.0151	ug/ml	78550	94.26							20220328_SR2OmToxCOM
AB01974183	01	Ainno_16251	Ainnocence	AIN1-2_AINNL0002	Lot# MB15NO2511	TC00821293	E019	0.00478	ug/ml	80350	96.43							20220328_SR2OmToxCOM
AB01974183	01	Ainno_16251	Ainnocence	AIN1-2_AINNL0002	Lot# MB15NO2511	TC00821293	E020	0.00151	ug/ml	82025	98.44							20220328_SR2OmToxCOM
AB01974183	01	Ainno_16251	Ainnocence	AIN1-2_AINNL0002	Lot# MB15NO2511	TC00821293	E021	0.000478	ug/ml	80125	96.16							20220328_SR2OmToxCOM
AB01974183	01	Ainno_16251	Ainnocence	AIN1-2_AINNL0002	Lot# MB15NO2511	TC00821293	E022	0.000151	ug/ml	85175	102.23							20220328_SR2OmToxCOM
AB01974168	01	Ainno_16251	Ainnocence	AIN1-9_AINNL0009	Lot# MB15NO4109	TC00821293	F003	12.33	ug/ml	83050	99.67	>12.33	Inactive	0.14			10	20220328_SR2OmToxCOM
AB01974168	01	Ainno_16251	Ainnocence	AIN1-9_AINNL0009	Lot# MB15NO4109	TC00821293	F004	3.9	ug/ml	82775	99.34							20220328_SR2OmToxCOM
AB01974168	01	Ainno_16251	Ainnocence	AIN1-9_AINNL0009	Lot# MB15NO4109	TC00821293	F005	1.23	ug/ml	81800	98.17							20220328_SR2OmToxCOM
AB01974168	01	Ainno_16251	Ainnocence	AIN1-9_AINNL0009	Lot# MB15NO4109	TC00821293	F006	0.389	ug/ml	84300	101.18							20220328_SR2OmToxCOM
AB01974168	01	Ainno_16251	Ainnocence	AIN1-9_AINNL0009	Lot# MB15NO4109	TC00821293	F007	0.123	ug/ml	82125	98.56							20220328_SR2OmToxCOM
AB01974168	01	Ainno_16251	Ainnocence	AIN1-9_AINNL0009	Lot# MB15NO4109	TC00821293	F008	0.0389	ug/ml	81075	97.3							20220328_SR2OmToxCOM
AB01974168	01	Ainno_16251	Ainnocence	AIN1-9_AINNL0009	Lot# MB15NO4109	TC00821293	F009	0.0123	ug/ml	82025	98.44							20220328_SR2OmToxCOM
AB01974168	01	Ainno_16251	Ainnocence	AIN1-9_AINNL0009	Lot# MB15NO4109	TC00821293	F010	0.00389	ug/ml	79425	95.31							20220328_SR2OmToxCOM
AB01974168	01	Ainno_16251	Ainnocence	AIN1-9_AINNL0009	Lot# MB15NO4109	TC00821293	F011	0.00123	ug/ml	80500	96.61							20220328_SR2OmToxCOM
AB01974168	01	Ainno_16251	Ainnocence	AIN1-9_AINNL0009	Lot# MB15NO4109	TC00821293	F012	0.000389	ug/ml	85375	102.47							20220328_SR2OmToxCOM
AB01974184	01	Ainno_16251	Ainnocence	AIN1-4_AINNL0004	Lot# MB15NO4104	TC00821293	F013	5.67	ug/ml	81375	97.66	>5.67	Inactive	1.43			10	20220328_SR2OmToxCOM
AB01974184	01	Ainno_16251	Ainnocence	AIN1-4_AINNL0004	Lot# MB15NO4104	TC00821293	F014	1.79	ug/ml	80200	96.25							20220328_SR2OmToxCOM
AB01974184	01	Ainno_16251	Ainnocence	AIN1-4_AINNL0004	Lot# MB15NO4104	TC00821293	F015	0.566	ug/ml	83925	100.73							20220328_SR2OmToxCOM
AB01974184	01	Ainno_16251	Ainnocence	AIN1-4_AINNL0004	Lot# MB15NO4104	TC00821293	F016	0.179	ug/ml	83050	99.67							20220328_SR2OmToxCOM
AB01974184	01	Ainno_16251	Ainnocence	AIN1-4_AINNL0004	Lot# MB15NO4104	TC00821293	F017	0.0566	ug/ml	86050	103.28							20220328_SR2OmToxCOM
AB01974184	01	Ainno_16251	Ainnocence	AIN1-4_AINNL0004	Lot# MB15NO4104	TC00821293	F018	0.0179	ug/ml	84900	101.9							20220328_SR2OmToxCOM
AB01974184	01	Ainno_16251	Ainnocence	AIN1-4_AINNL0004	Lot# MB15NO4104	TC00821293	F019	0.00566	ug/ml	81100	97.33							20220328_SR2OmToxCOM
AB01974184	01	Ainno_16251	Ainnocence	AIN1-4_AINNL0004	Lot# MB15NO4104	TC00821293	F020	0.00179	ug/ml	83050	99.67							20220328_SR2OmToxCOM
AB01974184	01	Ainno_16251	Ainnocence	AIN1-4_AINNL0004	Lot# MB15NO4104	TC00821293	F021	0.000566	ug/ml	80050	96.06							20220328_SR2OmToxCOM
AB01974184	01	Ainno_16251	Ainnocence	AIN1-4_AINNL0004	Lot# MB15NO4104	TC00821293	F022	0.000179	ug/ml	86425	103.73							20220328_SR2OmToxCOM
AB01974169	01	Ainno_16251	Ainnocence	AIN1-10_AINNL0010	Lot# MB15NO4110	TC00821293	G003	11.67	ug/ml	80775	96.94	>11.67	Inactive	6.77			10	20220328_SR2OmToxCOM
AB01974169	01	Ainno_16251	Ainnocence	AIN1-10_AINNL0010	Lot# MB15NO4110	TC00821293	G004	3.69	ug/ml	85625	102.77							20220328_SR2OmToxCOM
AB01974169	01	Ainno_16251	Ainnocence	AIN1-10_AINNL0010	Lot# MB15NO4110	TC00821293	G005	1.17	ug/ml	80700	96.85							20220328_SR2OmToxCOM
AB01974169	01	Ainno_16251	Ainnocence	AIN1-10_AINNL0010	Lot# MB15NO4110	TC00821293	G006	0.37	ug/ml	80225	96.28							20220328_SR2OmToxCOM
AB01974169	01	Ainno_16251	Ainnocence	AIN1-10_AINNL0010	Lot# MB15NO4110	TC00821293	G007	0.117	ug/ml	83375	100.06							20220328_SR2OmToxCOM
AB01974169	01	Ainno_16251	Ainnocence	AIN1-10_AINNL0010	Lot# MB15NO4110	TC00821293	G008	0.037	ug/ml	76375	91.64							20220328_SR2OmToxCOM
AB01974169	01	Ainno_16251	Ainnocence	AIN1-10_AINNL0010	Lot# MB15NO4110	TC00821293	G009	0.0117	ug/ml	81025	97.24							20220328_SR2OmToxCOM
AB01974169	01	Ainno_16251	Ainnocence	AIN1-10_AINNL0010	Lot# MB15NO4110	TC00821293	G010	0.0037	ug/ml	81050	97.27							20220328_SR2OmToxCOM
AB01974169	01	Ainno_16251	Ainnocence	AIN1-10_AINNL0010	Lot# MB15NO4110	TC00821293	G011	0.00117	ug/ml	85425	102.53							20220328_SR2OmToxCOM
AB01974169	01	Ainno_16251	Ainnocence	AIN1-10_AINNL0010	Lot# MB15NO4110	TC00821293	G012	0.00037	ug/ml	78600	94.32							20220328_SR2OmToxCOM
AB01974185	01	Ainno_16251	Ainnocence	AIN1-13_AINNL0013	Lot# MB15NO4113	TC00821293	G013	10.67	ug/ml	82500	99.01	>10.67	Inactive	0.15			10	20220328_SR2OmToxCOM
AB01974185	01	Ainno_16251	Ainnocence	AIN1-13_AINNL0013	Lot# MB15NO4113	TC00821293	G014	3.38	ug/ml	79650	95.58							20220328_SR2OmToxCOM
AB01974185	01	Ainno_16251	Ainnocence	AIN1-13_AINNL0013	Lot# MB15NO4113	TC00821293	G015	1.07	ug/ml	81425	97.72							20220328_SR2OmToxCOM
AB01974185	01	Ainno_16251	Ainnocence	AIN1-13_AINNL0013	Lot# MB15NO4113	TC00821293	G016	0.339	ug/ml	81550	97.87							20220328_SR2OmToxCOM
AB01974185	01	Ainno_16251	Ainnocence	AIN1-13_AINNL0013	Lot# MB15NO4113	TC00821293	G017	0.107	ug/ml	81900	98.29							20220328_SR2OmToxCOM
AB01974185	01	Ainno_16251	Ainnocence	AIN1-13_AINNL0013	Lot# MB15NO4113	TC00821293	G018	0.0339	ug/ml	79375	95.25							20220328_SR2OmToxCOM
AB01974185	01	Ainno_16251	Ainnocence	AIN1-13_AINNL0013	Lot# MB15NO4113	TC00821293	G019	0.0107	ug/ml	77500	93							20220328_SR2OmToxCOM
AB01974185	01	Ainno_16251	Ainnocence	AIN1-13_AINNL0013	Lot# MB15NO4113	TC00821293	G020	0.00339	ug/ml	80950	97.15							20220328_SR2OmToxCOM
AB01974185	01	Ainno_16251	Ainnocence	AIN1-13_AINNL0013	Lot# MB15NO4113	TC00821293	G021	0.00107	ug/ml	79300	95.16							20220328_SR2OmToxCOM
AB01974185	01	Ainno_16251	Ainnocence	AIN1-13_AINNL0013	Lot# MB15NO4113	TC00821293	G022	0.000339	ug/ml	80600	96.73							20220328_SR2OmToxCOM
AB01974170	01	Ainno_16251	Ainnocence	AIN1-18_AINNL0018	Lot# MB15NO4118	TC00821293	H003	11.22	ug/ml	82875	99.46	>11.22	Inactive	219.49			10	20220328_SR2OmToxCOM
AB01974170	01	Ainno_16251	Ainnocence	AIN1-18_AINNL0018	Lot# MB15NO4118	TC00821293	H004	3.55	ug/ml	85050	102.08							20220328_SR2OmToxCOM
AB01974170	01	Ainno_16251	Ainnocence	AIN1-18_AINNL0018	Lot# MB15NO4118	TC00821293	H005	1.12	ug/ml	84025	100.85							20220328_SR2OmToxCOM
AB01974170	01	Ainno_16251	Ainnocence	AIN1-18_AINNL0018	Lot# MB15NO4118	TC00821293	H006	0.354	ug/ml	79600	95.52							20220328_SR2OmToxCOM
AB01974170	01	Ainno_16251	Ainnocence	AIN1-18_AINNL0018	Lot# MB15NO4118	TC00821293	H007	0.112	ug/ml	80650	96.79							20220328_SR2OmToxCOM
AB01974170	01	Ainno_16251	Ainnocence	AIN1-18_AINNL0018	Lot# MB15NO4118	TC00821293	H008	0.0354	ug/ml	81500	97.81							20220328_SR2OmToxCOM
AB01974170	01	Ainno_16251	Ainnocence	AIN1-18_AINNL0018	Lot# MB15NO4118	TC00821293	H009	0.0112	ug/ml	82150	98.59							20220328_SR2OmToxCOM
AB01974170	01	Ainno_16251	Ainnocence	AIN1-18_AINNL0018	Lot# MB15NO4118	TC00821293	H010	0.00354	ug/ml	80100	96.13							20220328_SR2OmToxCOM
AB01974170	01	Ainno_16251	Ainnocence	AIN1-18_AINNL0018	Lot# MB15NO4118	TC00821293	H011	0.00112	ug/ml	82825	99.4							20220328_SR2OmToxCOM
AB01974170	01	Ainno_16251	Ainnocence	AIN1-18_AINNL0018	Lot# MB15NO4118	TC00821293	H012	0.000354	ug/ml	87150	104.6							20220328_SR2OmToxCOM
AB01974186	01	Ainno_16251	Ainnocence	AIN1-15_AINNL0015	Lot# MB15NO4115	TC00821293	H013	10.78	ug/ml	84000	100.82	>10.78	Inactive	-193.97			10	20220328_SR2OmToxCOM
AB01974186	01	Ainno_16251	Ainnocence	AIN1-15_AINNL0015	Lot# MB15NO4115	TC00821293	H014	3.41	ug/ml	85775	102.95							20220328_SR2OmToxCOM
AB01974186	01	Ainno_16251	Ainnocence	AIN1-15_AINNL0015	Lot# MB15NO4115	TC00821293	H015	1.08	ug/ml	83800	100.58							20220328_SR2OmToxCOM
AB01974186	01	Ainno_16251	Ainnocence	AIN1-15_AINNL0015	Lot# MB15NO4115	TC00821293	H016	0.342	ug/ml	79200	95.04							20220328_SR2OmToxCOM
AB01974186	01	Ainno_16251	Ainnocence	AIN1-15_AINNL0015	Lot# MB15NO4115	TC00821293	H017	0.108	ug/ml	81000	97.21							20220328_SR2OmToxCOM
AB01974186	01	Ainno_16251	Ainnocence	AIN1-15_AINNL0015	Lot# MB15NO4115	TC00821293	H018	0.0342	ug/ml	80975	97.18							20220328_SR2OmToxCOM
AB01974186	01	Ainno_16251	Ainnocence	AIN1-15_AINNL0015	Lot# MB15NO4115	TC00821293	H019	0.0108	ug/ml	80900	97.09							20220328_SR2OmToxCOM
AB01974186	01	Ainno_16251	Ainnocence	AIN1-15_AINNL0015	Lot# MB15NO4115	TC00821293	H020	0.00342	ug/ml	83925	100.73							20220328_SR2OmToxCOM
AB01974186	01	Ainno_16251	Ainnocence	AIN1-15_AINNL0015	Lot# MB15NO4115	TC00821293	H021	0.00108	ug/ml	84425	101.33							20220328_SR2OmToxCOM
AB01974186	01	Ainno_16251	Ainnocence	AIN1-15_AINNL0015	Lot# MB15NO4115	TC00821293	H022	0.000342	ug/ml	85725	102.89							20220328_SR2OmToxCOM
AB01974171	01	Ainno_16251	Ainnocence	AIN1-21_AINNL0021	Lot# MB15NO4121	TC00821293	I003	11	ug/ml	83300	99.97	>11.00	Inactive	0.14			10	20220328_SR2OmToxCOM
AB01974171	01	Ainno_16251	Ainnocence	AIN1-21_AINNL0021	Lot# MB15NO4121	TC00821293	I004	3.48	ug/ml	84100	100.94							20220328_SR2OmToxCOM
AB01974171	01	Ainno_16251	Ainnocence	AIN1-21_AINNL0021	Lot# MB15NO4121	TC00821293	I005	1.1	ug/ml	74550	89.45							20220328_SR2OmToxCOM
AB01974171	01	Ainno_16251	Ainnocence	AIN1-21_AINNL0021	Lot# MB15NO4121	TC00821293	I006	0.348	ug/ml	79750	95.7							20220328_SR2OmToxCOM
AB01974171	01	Ainno_16251	Ainnocence	AIN1-21_AINNL0021	Lot# MB15NO4121	TC00821293	I007	0.11	ug/ml	77550	93.06							20220328_SR2OmToxCOM
AB01974171	01	Ainno_16251	Ainnocence	AIN1-21_AINNL0021	Lot# MB15NO4121	TC00821293	I008	0.0348	ug/ml	79675	95.61							20220328_SR2OmToxCOM
AB01974171	01	Ainno_16251	Ainnocence	AIN1-21_AINNL0021	Lot# MB15NO4121	TC00821293	I009	0.011	ug/ml	81950	98.35							20220328_SR2OmToxCOM
AB01974171	01	Ainno_16251	Ainnocence	AIN1-21_AINNL0021	Lot# MB15NO4121	TC00821293	I010	0.00348	ug/ml	77425	92.91							20220328_SR2OmToxCOM
AB01974171	01	Ainno_16251	Ainnocence	AIN1-21_AINNL0021	Lot# MB15NO4121	TC00821293	I011	0.0011	ug/ml	81075	97.3							20220328_SR2OmToxCOM
AB01974171	01	Ainno_16251	Ainnocence	AIN1-21_AINNL0021	Lot# MB15NO4121	TC00821293	I012	0.000348	ug/ml	77350	92.82							20220328_SR2OmToxCOM
AB01974187	01	Ainno_16251	Ainnocence	AIN1-38_AINNL0038	Lot# MB15NO4138	TC00821293	I013	10.89	ug/ml	77150	92.58	>10.89	Inactive	-39.12			10	20220328_SR2OmToxCOM
AB01974187	01	Ainno_16251	Ainnocence	AIN1-38_AINNL0038	Lot# MB15NO4138	TC00821293	I014	3.45	ug/ml	84100	100.94							20220328_SR2OmToxCOM
AB01974187	01	Ainno_16251	Ainnocence	AIN1-38_AINNL0038	Lot# MB15NO4138	TC00821293	I015	1.09	ug/ml	80700	96.85							20220328_SR2OmToxCOM
AB01974187	01	Ainno_16251	Ainnocence	AIN1-38_AINNL0038	Lot# MB15NO4138	TC00821293	I016	0.345	ug/ml	76075	91.28							20220328_SR2OmToxCOM
AB01974187	01	Ainno_16251	Ainnocence	AIN1-38_AINNL0038	Lot# MB15NO4138	TC00821293	I017	0.109	ug/ml	78750	94.5							20220328_SR2OmToxCOM
AB01974187	01	Ainno_16251	Ainnocence	AIN1-38_AINNL0038	Lot# MB15NO4138	TC00821293	I018	0.0345	ug/ml	80050	96.06							20220328_SR2OmToxCOM
AB01974187	01	Ainno_16251	Ainnocence	AIN1-38_AINNL0038	Lot# MB15NO4138	TC00821293	I019	0.0109	ug/ml	80775	96.94							20220328_SR2OmToxCOM
AB01974187	01	Ainno_16251	Ainnocence	AIN1-38_AINNL0038	Lot# MB15NO4138	TC00821293	I020	0.00345	ug/ml	76450	91.74							20220328_SR2OmToxCOM
AB01974187	01	Ainno_16251	Ainnocence	AIN1-38_AINNL0038	Lot# MB15NO4138	TC00821293	I021	0.00109	ug/ml	78975	94.77							20220328_SR2OmToxCOM
AB01974187	01	Ainno_16251	Ainnocence	AIN1-38_AINNL0038	Lot# MB15NO4138	TC00821293	I022	0.000345	ug/ml	79525	95.43							20220328_SR2OmToxCOM
AB01974172	01	Ainno_16251	Ainnocence	AIN1-22_AINNL0022	Lot# MB15NO4122	TC00821293	J003	10.22	ug/ml	84325	101.21	>10.22	Inactive	<-1000			10	20220328_SR2OmToxCOM
AB01974172	01	Ainno_16251	Ainnocence	AIN1-22_AINNL0022	Lot# MB15NO4122	TC00821293	J004	3.23	ug/ml	83000	99.61							20220328_SR2OmToxCOM
AB01974172	01	Ainno_16251	Ainnocence	AIN1-22_AINNL0022	Lot# MB15NO4122	TC00821293	J005	1.02	ug/ml	84375	101.27							20220328_SR2OmToxCOM
AB01974172	01	Ainno_16251	Ainnocence	AIN1-22_AINNL0022	Lot# MB15NO4122	TC00821293	J006	0.323	ug/ml	81975	98.38							20220328_SR2OmToxCOM
AB01974172	01	Ainno_16251	Ainnocence	AIN1-22_AINNL0022	Lot# MB15NO4122	TC00821293	J007	0.102	ug/ml	80075	96.09							20220328_SR2OmToxCOM
AB01974172	01	Ainno_16251	Ainnocence	AIN1-22_AINNL0022	Lot# MB15NO4122	TC00821293	J008	0.0323	ug/ml	82750	99.31							20220328_SR2OmToxCOM
AB01974172	01	Ainno_16251	Ainnocence	AIN1-22_AINNL0022	Lot# MB15NO4122	TC00821293	J009	0.0102	ug/ml	81000	97.21							20220328_SR2OmToxCOM
AB01974172	01	Ainno_16251	Ainnocence	AIN1-22_AINNL0022	Lot# MB15NO4122	TC00821293	J010	0.00323	ug/ml	86350	103.64							20220328_SR2OmToxCOM
AB01974172	01	Ainno_16251	Ainnocence	AIN1-22_AINNL0022	Lot# MB15NO4122	TC00821293	J011	0.00102	ug/ml	85575	102.71							20220328_SR2OmToxCOM
AB01974172	01	Ainno_16251	Ainnocence	AIN1-22_AINNL0022	Lot# MB15NO4122	TC00821293	J012	0.000323	ug/ml	80475	96.58							20220328_SR2OmToxCOM
AB01974188	01	Ainno_16251	Ainnocence	AIN1-39_AINNL0039	Lot# MB15NO4139	TC00821293	J013	10.67	ug/ml	85425	102.53	>10.67	Inactive	1.38			10	20220328_SR2OmToxCOM
AB01974188	01	Ainno_16251	Ainnocence	AIN1-39_AINNL0039	Lot# MB15NO4139	TC00821293	J014	3.38	ug/ml	80450	96.55							20220328_SR2OmToxCOM
AB01974188	01	Ainno_16251	Ainnocence	AIN1-39_AINNL0039	Lot# MB15NO4139	TC00821293	J015	1.07	ug/ml	82650	99.19							20220328_SR2OmToxCOM
AB01974188	01	Ainno_16251	Ainnocence	AIN1-39_AINNL0039	Lot# MB15NO4139	TC00821293	J016	0.339	ug/ml	80975	97.18							20220328_SR2OmToxCOM
AB01974188	01	Ainno_16251	Ainnocence	AIN1-39_AINNL0039	Lot# MB15NO4139	TC00821293	J017	0.107	ug/ml	82000	98.41							20220328_SR2OmToxCOM
AB01974188	01	Ainno_16251	Ainnocence	AIN1-39_AINNL0039	Lot# MB15NO4139	TC00821293	J018	0.0339	ug/ml	82100	98.53							20220328_SR2OmToxCOM
AB01974188	01	Ainno_16251	Ainnocence	AIN1-39_AINNL0039	Lot# MB15NO4139	TC00821293	J019	0.0107	ug/ml	84300	101.18							20220328_SR2OmToxCOM
AB01974188	01	Ainno_16251	Ainnocence	AIN1-39_AINNL0039	Lot# MB15NO4139	TC00821293	J020	0.00339	ug/ml	83250	99.91							20220328_SR2OmToxCOM
AB01974188	01	Ainno_16251	Ainnocence	AIN1-39_AINNL0039	Lot# MB15NO4139	TC00821293	J021	0.00107	ug/ml	83975	100.79							20220328_SR2OmToxCOM
AB01974188	01	Ainno_16251	Ainnocence	AIN1-39_AINNL0039	Lot# MB15NO4139	TC00821293	J022	0.000339	ug/ml	86225	103.49							20220328_SR2OmToxCOM
AB01974173	01	Ainno_16251	Ainnocence	AIN1-26_AINNL0026	Lot# MB15NO4126	TC00821293	K003	10.89	ug/ml	85550	102.68	>10.89	Inactive	1.14			10	20220328_SR2OmToxCOM
AB01974173	01	Ainno_16251	Ainnocence	AIN1-26_AINNL0026	Lot# MB15NO4126	TC00821293	K004	3.45	ug/ml	83050	99.67							20220328_SR2OmToxCOM
AB01974173	01	Ainno_16251	Ainnocence	AIN1-26_AINNL0026	Lot# MB15NO4126	TC00821293	K005	1.09	ug/ml	81825	98.2							20220328_SR2OmToxCOM
AB01974173	01	Ainno_16251	Ainnocence	AIN1-26_AINNL0026	Lot# MB15NO4126	TC00821293	K006	0.345	ug/ml	87275	104.75							20220328_SR2OmToxCOM
AB01974173	01	Ainno_16251	Ainnocence	AIN1-26_AINNL0026	Lot# MB15NO4126	TC00821293	K007	0.109	ug/ml	82450	98.95							20220328_SR2OmToxCOM
AB01974173	01	Ainno_16251	Ainnocence	AIN1-26_AINNL0026	Lot# MB15NO4126	TC00821293	K008	0.0345	ug/ml	83350	100.03							20220328_SR2OmToxCOM
AB01974173	01	Ainno_16251	Ainnocence	AIN1-26_AINNL0026	Lot# MB15NO4126	TC00821293	K009	0.0109	ug/ml	84800	101.78							20220328_SR2OmToxCOM
AB01974173	01	Ainno_16251	Ainnocence	AIN1-26_AINNL0026	Lot# MB15NO4126	TC00821293	K010	0.00345	ug/ml	81425	97.72							20220328_SR2OmToxCOM
AB01974173	01	Ainno_16251	Ainnocence	AIN1-26_AINNL0026	Lot# MB15NO4126	TC00821293	K011	0.00109	ug/ml	81925	98.32							20220328_SR2OmToxCOM
AB01974173	01	Ainno_16251	Ainnocence	AIN1-26_AINNL0026	Lot# MB15NO4126	TC00821293	K012	0.000345	ug/ml	76950	92.34							20220328_SR2OmToxCOM
AB01974189	01	Ainno_16251	Ainnocence	AIN1-40_AINNL0040	Lot# MB15NO4140	TC00821293	K013	10.78	ug/ml	84075	100.91	>10.78	Inactive	0.17			10	20220328_SR2OmToxCOM
AB01974189	01	Ainno_16251	Ainnocence	AIN1-40_AINNL0040	Lot# MB15NO4140	TC00821293	K014	3.41	ug/ml	81375	97.66							20220328_SR2OmToxCOM
AB01974189	01	Ainno_16251	Ainnocence	AIN1-40_AINNL0040	Lot# MB15NO4140	TC00821293	K015	1.08	ug/ml	82950	99.55							20220328_SR2OmToxCOM
AB01974189	01	Ainno_16251	Ainnocence	AIN1-40_AINNL0040	Lot# MB15NO4140	TC00821293	K016	0.342	ug/ml	80700	96.85							20220328_SR2OmToxCOM
AB01974189	01	Ainno_16251	Ainnocence	AIN1-40_AINNL0040	Lot# MB15NO4140	TC00821293	K017	0.108	ug/ml	84975	101.99							20220328_SR2OmToxCOM
AB01974189	01	Ainno_16251	Ainnocence	AIN1-40_AINNL0040	Lot# MB15NO4140	TC00821293	K018	0.0342	ug/ml	80825	97							20220328_SR2OmToxCOM
AB01974189	01	Ainno_16251	Ainnocence	AIN1-40_AINNL0040	Lot# MB15NO4140	TC00821293	K019	0.0108	ug/ml	78725	94.47							20220328_SR2OmToxCOM
AB01974189	01	Ainno_16251	Ainnocence	AIN1-40_AINNL0040	Lot# MB15NO4140	TC00821293	K020	0.00342	ug/ml	78400	94.08							20220328_SR2OmToxCOM
AB01974189	01	Ainno_16251	Ainnocence	AIN1-40_AINNL0040	Lot# MB15NO4140	TC00821293	K021	0.00108	ug/ml	80925	97.12							20220328_SR2OmToxCOM
AB01974189	01	Ainno_16251	Ainnocence	AIN1-40_AINNL0040	Lot# MB15NO4140	TC00821293	K022	0.000342	ug/ml	79825	95.79							20220328_SR2OmToxCOM
AB01974174	01	Ainno_16251	Ainnocence	AIN1-28_AINNL0028	Lot# MB15NO4128	TC00821293	L003	9.67	ug/ml	80825	97	>9.67	Inactive	1.42			10	20220328_SR2OmToxCOM
AB01974174	01	Ainno_16251	Ainnocence	AIN1-28_AINNL0028	Lot# MB15NO4128	TC00821293	L004	3.06	ug/ml	80475	96.58							20220328_SR2OmToxCOM
AB01974174	01	Ainno_16251	Ainnocence	AIN1-28_AINNL0028	Lot# MB15NO4128	TC00821293	L005	0.968	ug/ml	80550	96.67							20220328_SR2OmToxCOM
AB01974174	01	Ainno_16251	Ainnocence	AIN1-28_AINNL0028	Lot# MB15NO4128	TC00821293	L006	0.306	ug/ml	81825	98.2							20220328_SR2OmToxCOM
AB01974174	01	Ainno_16251	Ainnocence	AIN1-28_AINNL0028	Lot# MB15NO4128	TC00821293	L007	0.0968	ug/ml	88175	105.84							20220328_SR2OmToxCOM
AB01974174	01	Ainno_16251	Ainnocence	AIN1-28_AINNL0028	Lot# MB15NO4128	TC00821293	L008	0.0306	ug/ml	84450	101.36							20220328_SR2OmToxCOM
AB01974174	01	Ainno_16251	Ainnocence	AIN1-28_AINNL0028	Lot# MB15NO4128	TC00821293	L009	0.00968	ug/ml	83900	100.7							20220328_SR2OmToxCOM
AB01974174	01	Ainno_16251	Ainnocence	AIN1-28_AINNL0028	Lot# MB15NO4128	TC00821293	L010	0.00306	ug/ml	79600	95.52							20220328_SR2OmToxCOM
AB01974174	01	Ainno_16251	Ainnocence	AIN1-28_AINNL0028	Lot# MB15NO4128	TC00821293	L011	0.000968	ug/ml	85375	102.47							20220328_SR2OmToxCOM
AB01974174	01	Ainno_16251	Ainnocence	AIN1-28_AINNL0028	Lot# MB15NO4128	TC00821293	L012	0.000306	ug/ml	84500	101.42							20220328_SR2OmToxCOM
AB01974190	01	Ainno_16251	Ainnocence	AIN1-41_AINNL0041	Lot# MB15NO4141	TC00821293	L013	10.89	ug/ml	86700	104.06	>10.89	Inactive	0.6			10	20220328_SR2OmToxCOM
AB01974190	01	Ainno_16251	Ainnocence	AIN1-41_AINNL0041	Lot# MB15NO4141	TC00821293	L014	3.45	ug/ml	83375	100.06							20220328_SR2OmToxCOM
AB01974190	01	Ainno_16251	Ainnocence	AIN1-41_AINNL0041	Lot# MB15NO4141	TC00821293	L015	1.09	ug/ml	84225	101.09							20220328_SR2OmToxCOM
AB01974190	01	Ainno_16251	Ainnocence	AIN1-41_AINNL0041	Lot# MB15NO4141	TC00821293	L016	0.345	ug/ml	86275	103.55							20220328_SR2OmToxCOM
AB01974190	01	Ainno_16251	Ainnocence	AIN1-41_AINNL0041	Lot# MB15NO4141	TC00821293	L017	0.109	ug/ml	86150	103.4							20220328_SR2OmToxCOM
AB01974190	01	Ainno_16251	Ainnocence	AIN1-41_AINNL0041	Lot# MB15NO4141	TC00821293	L018	0.0345	ug/ml	81250	97.51							20220328_SR2OmToxCOM
AB01974190	01	Ainno_16251	Ainnocence	AIN1-41_AINNL0041	Lot# MB15NO4141	TC00821293	L019	0.0109	ug/ml	80950	97.15							20220328_SR2OmToxCOM
AB01974190	01	Ainno_16251	Ainnocence	AIN1-41_AINNL0041	Lot# MB15NO4141	TC00821293	L020	0.00345	ug/ml	81475	97.78							20220328_SR2OmToxCOM
AB01974190	01	Ainno_16251	Ainnocence	AIN1-41_AINNL0041	Lot# MB15NO4141	TC00821293	L021	0.00109	ug/ml	84400	101.3							20220328_SR2OmToxCOM
AB01974190	01	Ainno_16251	Ainnocence	AIN1-41_AINNL0041	Lot# MB15NO4141	TC00821293	L022	0.000345	ug/ml	80675	96.82							20220328_SR2OmToxCOM
AB01974175	01	Ainno_16251	Ainnocence	AIN1-29_AINNL0029	Lot# MB15NO4129	TC00821293	M003	10	ug/ml	81700	98.05	>10.00	Inactive	-0.13			10	20220328_SR2OmToxCOM
AB01974175	01	Ainno_16251	Ainnocence	AIN1-29_AINNL0029	Lot# MB15NO4129	TC00821293	M004	3.16	ug/ml	82800	99.37							20220328_SR2OmToxCOM
AB01974175	01	Ainno_16251	Ainnocence	AIN1-29_AINNL0029	Lot# MB15NO4129	TC00821293	M005	1	ug/ml	82750	99.31							20220328_SR2OmToxCOM
AB01974175	01	Ainno_16251	Ainnocence	AIN1-29_AINNL0029	Lot# MB15NO4129	TC00821293	M006	0.316	ug/ml	82850	99.43							20220328_SR2OmToxCOM
AB01974175	01	Ainno_16251	Ainnocence	AIN1-29_AINNL0029	Lot# MB15NO4129	TC00821293	M007	0.1	ug/ml	85550	102.68							20220328_SR2OmToxCOM
AB01974175	01	Ainno_16251	Ainnocence	AIN1-29_AINNL0029	Lot# MB15NO4129	TC00821293	M008	0.0316	ug/ml	80650	96.79							20220328_SR2OmToxCOM
AB01974175	01	Ainno_16251	Ainnocence	AIN1-29_AINNL0029	Lot# MB15NO4129	TC00821293	M009	0.01	ug/ml	80025	96.03							20220328_SR2OmToxCOM
AB01974175	01	Ainno_16251	Ainnocence	AIN1-29_AINNL0029	Lot# MB15NO4129	TC00821293	M010	0.00316	ug/ml	81125	97.36							20220328_SR2OmToxCOM
AB01974175	01	Ainno_16251	Ainnocence	AIN1-29_AINNL0029	Lot# MB15NO4129	TC00821293	M011	0.001	ug/ml	83500	100.21							20220328_SR2OmToxCOM
AB01974175	01	Ainno_16251	Ainnocence	AIN1-29_AINNL0029	Lot# MB15NO4129	TC00821293	M012	0.000316	ug/ml	81425	97.72							20220328_SR2OmToxCOM
AB01974191	01	Ainno_16251	Ainnocence	AIN1-42_AINNL0042	Lot# MB15NO4142	TC00821293	M013	10.89	ug/ml	78125	93.75	>10.89	Inactive	0.22			10	20220328_SR2OmToxCOM
AB01974191	01	Ainno_16251	Ainnocence	AIN1-42_AINNL0042	Lot# MB15NO4142	TC00821293	M014	3.45	ug/ml	85625	102.77							20220328_SR2OmToxCOM
AB01974191	01	Ainno_16251	Ainnocence	AIN1-42_AINNL0042	Lot# MB15NO4142	TC00821293	M015	1.09	ug/ml	83700	100.45							20220328_SR2OmToxCOM
AB01974191	01	Ainno_16251	Ainnocence	AIN1-42_AINNL0042	Lot# MB15NO4142	TC00821293	M016	0.345	ug/ml	83525	100.24							20220328_SR2OmToxCOM
AB01974191	01	Ainno_16251	Ainnocence	AIN1-42_AINNL0042	Lot# MB15NO4142	TC00821293	M017	0.109	ug/ml	84175	101.03							20220328_SR2OmToxCOM
AB01974191	01	Ainno_16251	Ainnocence	AIN1-42_AINNL0042	Lot# MB15NO4142	TC00821293	M018	0.0345	ug/ml	79650	95.58							20220328_SR2OmToxCOM
AB01974191	01	Ainno_16251	Ainnocence	AIN1-42_AINNL0042	Lot# MB15NO4142	TC00821293	M019	0.0109	ug/ml	83525	100.24							20220328_SR2OmToxCOM
AB01974191	01	Ainno_16251	Ainnocence	AIN1-42_AINNL0042	Lot# MB15NO4142	TC00821293	M020	0.00345	ug/ml	83500	100.21							20220328_SR2OmToxCOM
AB01974191	01	Ainno_16251	Ainnocence	AIN1-42_AINNL0042	Lot# MB15NO4142	TC00821293	M021	0.00109	ug/ml	81375	97.66							20220328_SR2OmToxCOM
AB01974191	01	Ainno_16251	Ainnocence	AIN1-42_AINNL0042	Lot# MB15NO4142	TC00821293	M022	0.000345	ug/ml	81300	97.57							20220328_SR2OmToxCOM
AB01974176	01	Ainno_16251	Ainnocence	AIN1-30_AINNL0030	Lot# MB15NO4130	TC00821293	N003	8.67	ug/ml	80950	97.15	>8.67	Inactive	0.44			10	20220328_SR2OmToxCOM
AB01974176	01	Ainno_16251	Ainnocence	AIN1-30_AINNL0030	Lot# MB15NO4130	TC00821293	N004	2.74	ug/ml	79900	95.88							20220328_SR2OmToxCOM
AB01974176	01	Ainno_16251	Ainnocence	AIN1-30_AINNL0030	Lot# MB15NO4130	TC00821293	N005	0.867	ug/ml	85025	102.05							20220328_SR2OmToxCOM
AB01974176	01	Ainno_16251	Ainnocence	AIN1-30_AINNL0030	Lot# MB15NO4130	TC00821293	N006	0.274	ug/ml	86475	103.79							20220328_SR2OmToxCOM
AB01974176	01	Ainno_16251	Ainnocence	AIN1-30_AINNL0030	Lot# MB15NO4130	TC00821293	N007	0.0867	ug/ml	83375	100.06							20220328_SR2OmToxCOM
AB01974176	01	Ainno_16251	Ainnocence	AIN1-30_AINNL0030	Lot# MB15NO4130	TC00821293	N008	0.0274	ug/ml	83800	100.58							20220328_SR2OmToxCOM
AB01974176	01	Ainno_16251	Ainnocence	AIN1-30_AINNL0030	Lot# MB15NO4130	TC00821293	N009	0.00867	ug/ml	87875	105.48							20220328_SR2OmToxCOM
AB01974176	01	Ainno_16251	Ainnocence	AIN1-30_AINNL0030	Lot# MB15NO4130	TC00821293	N010	0.00274	ug/ml	84550	101.48							20220328_SR2OmToxCOM
AB01974176	01	Ainno_16251	Ainnocence	AIN1-30_AINNL0030	Lot# MB15NO4130	TC00821293	N011	0.000867	ug/ml	85225	102.29							20220328_SR2OmToxCOM
AB01974176	01	Ainno_16251	Ainnocence	AIN1-30_AINNL0030	Lot# MB15NO4130	TC00821293	N012	0.000274	ug/ml	81125	97.36							20220328_SR2OmToxCOM
AB01974192	01	Ainno_16251	Ainnocence	AIN1-11_AINNL0011	Lot# MB15NO4111	TC00821293	N013	5.44	ug/ml	81150	97.39	>5.44	Inactive	-40.04			10	20220328_SR2OmToxCOM
AB01974192	01	Ainno_16251	Ainnocence	AIN1-11_AINNL0011	Lot# MB15NO4111	TC00821293	N014	1.72	ug/ml	81350	97.63							20220328_SR2OmToxCOM
AB01974192	01	Ainno_16251	Ainnocence	AIN1-11_AINNL0011	Lot# MB15NO4111	TC00821293	N015	0.544	ug/ml	86600	103.94							20220328_SR2OmToxCOM
AB01974192	01	Ainno_16251	Ainnocence	AIN1-11_AINNL0011	Lot# MB15NO4111	TC00821293	N016	0.172	ug/ml	83650	100.39							20220328_SR2OmToxCOM
AB01974192	01	Ainno_16251	Ainnocence	AIN1-11_AINNL0011	Lot# MB15NO4111	TC00821293	N017	0.0544	ug/ml	83375	100.06							20220328_SR2OmToxCOM
AB01974192	01	Ainno_16251	Ainnocence	AIN1-11_AINNL0011	Lot# MB15NO4111	TC00821293	N018	0.0172	ug/ml	79975	95.97							20220328_SR2OmToxCOM
AB01974192	01	Ainno_16251	Ainnocence	AIN1-11_AINNL0011	Lot# MB15NO4111	TC00821293	N019	0.00544	ug/ml	81100	97.33							20220328_SR2OmToxCOM
AB01974192	01	Ainno_16251	Ainnocence	AIN1-11_AINNL0011	Lot# MB15NO4111	TC00821293	N020	0.00172	ug/ml	84850	101.84							20220328_SR2OmToxCOM
AB01974192	01	Ainno_16251	Ainnocence	AIN1-11_AINNL0011	Lot# MB15NO4111	TC00821293	N021	0.000544	ug/ml	79925	95.91							20220328_SR2OmToxCOM
AB01974192	01	Ainno_16251	Ainnocence	AIN1-11_AINNL0011	Lot# MB15NO4111	TC00821293	N022	0.000172	ug/ml	82150	98.59							20220328_SR2OmToxCOM
AB01974177	01	Ainno_16251	Ainnocence	AIN1-31_AINNL0031	Lot# MB15NO4131	TC00821293	O003	9.78	ug/ml	82350	98.83	>9.78	Inactive	1.72			10	20220328_SR2OmToxCOM
AB01974177	01	Ainno_16251	Ainnocence	AIN1-31_AINNL0031	Lot# MB15NO4131	TC00821293	O004	3.09	ug/ml	82850	99.43							20220328_SR2OmToxCOM
AB01974177	01	Ainno_16251	Ainnocence	AIN1-31_AINNL0031	Lot# MB15NO4131	TC00821293	O005	0.978	ug/ml	85300	102.38							20220328_SR2OmToxCOM
AB01974177	01	Ainno_16251	Ainnocence	AIN1-31_AINNL0031	Lot# MB15NO4131	TC00821293	O006	0.309	ug/ml	82025	98.44							20220328_SR2OmToxCOM
AB01974177	01	Ainno_16251	Ainnocence	AIN1-31_AINNL0031	Lot# MB15NO4131	TC00821293	O007	0.0978	ug/ml	85900	103.1							20220328_SR2OmToxCOM
AB01974177	01	Ainno_16251	Ainnocence	AIN1-31_AINNL0031	Lot# MB15NO4131	TC00821293	O008	0.0309	ug/ml	84025	100.85							20220328_SR2OmToxCOM
AB01974177	01	Ainno_16251	Ainnocence	AIN1-31_AINNL0031	Lot# MB15NO4131	TC00821293	O009	0.00978	ug/ml	88925	106.74							20220328_SR2OmToxCOM
AB01974177	01	Ainno_16251	Ainnocence	AIN1-31_AINNL0031	Lot# MB15NO4131	TC00821293	O010	0.00309	ug/ml	82275	98.74							20220328_SR2OmToxCOM
AB01974177	01	Ainno_16251	Ainnocence	AIN1-31_AINNL0031	Lot# MB15NO4131	TC00821293	O011	0.000978	ug/ml	87925	105.54							20220328_SR2OmToxCOM
AB01974177	01	Ainno_16251	Ainnocence	AIN1-31_AINNL0031	Lot# MB15NO4131	TC00821293	O012	0.000309	ug/ml	90350	108.45							20220328_SR2OmToxCOM
AB01974193	01	Ainno_16251	Ainnocence	AIN1-14_AINNL0014	Lot# MB15NO4114	TC00821293	O013	11.89	ug/ml	83100	99.73	>11.89	Inactive	0.5			10	20220328_SR2OmToxCOM
AB01974193	01	Ainno_16251	Ainnocence	AIN1-14_AINNL0014	Lot# MB15NO4114	TC00821293	O014	3.76	ug/ml	84075	100.91							20220328_SR2OmToxCOM
AB01974193	01	Ainno_16251	Ainnocence	AIN1-14_AINNL0014	Lot# MB15NO4114	TC00821293	O015	1.19	ug/ml	86000	103.22							20220328_SR2OmToxCOM
AB01974193	01	Ainno_16251	Ainnocence	AIN1-14_AINNL0014	Lot# MB15NO4114	TC00821293	O016	0.377	ug/ml	84425	101.33							20220328_SR2OmToxCOM
AB01974193	01	Ainno_16251	Ainnocence	AIN1-14_AINNL0014	Lot# MB15NO4114	TC00821293	O017	0.119	ug/ml	83250	99.91							20220328_SR2OmToxCOM
AB01974193	01	Ainno_16251	Ainnocence	AIN1-14_AINNL0014	Lot# MB15NO4114	TC00821293	O018	0.0377	ug/ml	79875	95.85							20220328_SR2OmToxCOM
AB01974193	01	Ainno_16251	Ainnocence	AIN1-14_AINNL0014	Lot# MB15NO4114	TC00821293	O019	0.0119	ug/ml	83875	100.67							20220328_SR2OmToxCOM
AB01974193	01	Ainno_16251	Ainnocence	AIN1-14_AINNL0014	Lot# MB15NO4114	TC00821293	O020	0.00377	ug/ml	84625	101.57							20220328_SR2OmToxCOM
AB01974193	01	Ainno_16251	Ainnocence	AIN1-14_AINNL0014	Lot# MB15NO4114	TC00821293	O021	0.00119	ug/ml	81750	98.11							20220328_SR2OmToxCOM
AB01974193	01	Ainno_16251	Ainnocence	AIN1-14_AINNL0014	Lot# MB15NO4114	TC00821293	O022	0.000377	ug/ml	82750	99.31							20220328_SR2OmToxCOM
AB01974178	01	Ainno_16251	Ainnocence	AIN1-32_AINNL0032	Lot# MB15NO4132	TC00821293	P003	10.22	ug/ml	82025	98.44	>10.22	Inactive	28.04			10	20220328_SR2OmToxCOM
AB01974178	01	Ainno_16251	Ainnocence	AIN1-32_AINNL0032	Lot# MB15NO4132	TC00821293	P004	3.23	ug/ml	86025	103.25							20220328_SR2OmToxCOM
AB01974178	01	Ainno_16251	Ainnocence	AIN1-32_AINNL0032	Lot# MB15NO4132	TC00821293	P005	1.02	ug/ml	86475	103.79							20220328_SR2OmToxCOM
AB01974178	01	Ainno_16251	Ainnocence	AIN1-32_AINNL0032	Lot# MB15NO4132	TC00821293	P006	0.323	ug/ml	84225	101.09							20220328_SR2OmToxCOM
AB01974178	01	Ainno_16251	Ainnocence	AIN1-32_AINNL0032	Lot# MB15NO4132	TC00821293	P007	0.102	ug/ml	82825	99.4							20220328_SR2OmToxCOM
AB01974178	01	Ainno_16251	Ainnocence	AIN1-32_AINNL0032	Lot# MB15NO4132	TC00821293	P008	0.0323	ug/ml	88500	106.23							20220328_SR2OmToxCOM
AB01974178	01	Ainno_16251	Ainnocence	AIN1-32_AINNL0032	Lot# MB15NO4132	TC00821293	P009	0.0102	ug/ml	82925	99.52							20220328_SR2OmToxCOM
AB01974178	01	Ainno_16251	Ainnocence	AIN1-32_AINNL0032	Lot# MB15NO4132	TC00821293	P010	0.00323	ug/ml	86100	103.34							20220328_SR2OmToxCOM
AB01974178	01	Ainno_16251	Ainnocence	AIN1-32_AINNL0032	Lot# MB15NO4132	TC00821293	P011	0.00102	ug/ml	85500	102.62							20220328_SR2OmToxCOM
AB01974178	01	Ainno_16251	Ainnocence	AIN1-32_AINNL0032	Lot# MB15NO4132	TC00821293	P012	0.000323	ug/ml	83425	100.12							20220328_SR2OmToxCOM
AB01974194	01	Ainno_16251	Ainnocence	AIN1-17_AINNL0017	Lot# MB15NO4117	TC00821293	P013	11.78	ug/ml	85550	102.68	>11.78	Inactive	0.55			10	20220328_SR2OmToxCOM
AB01974194	01	Ainno_16251	Ainnocence	AIN1-17_AINNL0017	Lot# MB15NO4117	TC00821293	P014	3.73	ug/ml	81150	97.39							20220328_SR2OmToxCOM
AB01974194	01	Ainno_16251	Ainnocence	AIN1-17_AINNL0017	Lot# MB15NO4117	TC00821293	P015	1.18	ug/ml	82050	98.47							20220328_SR2OmToxCOM
AB01974194	01	Ainno_16251	Ainnocence	AIN1-17_AINNL0017	Lot# MB15NO4117	TC00821293	P016	0.373	ug/ml	84725	101.69							20220328_SR2OmToxCOM
AB01974194	01	Ainno_16251	Ainnocence	AIN1-17_AINNL0017	Lot# MB15NO4117	TC00821293	P017	0.118	ug/ml	87900	105.51							20220328_SR2OmToxCOM
AB01974194	01	Ainno_16251	Ainnocence	AIN1-17_AINNL0017	Lot# MB15NO4117	TC00821293	P018	0.0373	ug/ml	83325	100							20220328_SR2OmToxCOM
AB01974194	01	Ainno_16251	Ainnocence	AIN1-17_AINNL0017	Lot# MB15NO4117	TC00821293	P019	0.0118	ug/ml	81650	97.99							20220328_SR2OmToxCOM
AB01974194	01	Ainno_16251	Ainnocence	AIN1-17_AINNL0017	Lot# MB15NO4117	TC00821293	P020	0.00373	ug/ml	83625	100.36							20220328_SR2OmToxCOM
AB01974194	01	Ainno_16251	Ainnocence	AIN1-17_AINNL0017	Lot# MB15NO4117	TC00821293	P021	0.00118	ug/ml	80625	96.76							20220328_SR2OmToxCOM
AB01974194	01	Ainno_16251	Ainnocence	AIN1-17_AINNL0017	Lot# MB15NO4117	TC00821293	P022	0.000373	ug/ml	82300	98.77							20220328_SR2OmToxCOM
AB01974195	01	Ainno_16251	Ainnocence	AIN1-12_AINNL0012	Lot# MB15NO2405	TC00821296	A003	41.22	ug/ml	80400	91.44	>41.22	Inactive	0.12			10	20220328_SR2OmToxCOM
AB01974195	01	Ainno_16251	Ainnocence	AIN1-12_AINNL0012	Lot# MB15NO2405	TC00821296	A004	13	ug/ml	83100	94.51							20220328_SR2OmToxCOM
AB01974195	01	Ainno_16251	Ainnocence	AIN1-12_AINNL0012	Lot# MB15NO2405	TC00821296	A005	4.11	ug/ml	88475	100.64							20220328_SR2OmToxCOM
AB01974195	01	Ainno_16251	Ainnocence	AIN1-12_AINNL0012	Lot# MB15NO2405	TC00821296	A006	1.3	ug/ml	85425	97.16							20220328_SR2OmToxCOM
AB01974195	01	Ainno_16251	Ainnocence	AIN1-12_AINNL0012	Lot# MB15NO2405	TC00821296	A007	0.411	ug/ml	88575	100.75							20220328_SR2OmToxCOM
AB01974195	01	Ainno_16251	Ainnocence	AIN1-12_AINNL0012	Lot# MB15NO2405	TC00821296	A008	0.13	ug/ml	81625	92.83							20220328_SR2OmToxCOM
AB01974195	01	Ainno_16251	Ainnocence	AIN1-12_AINNL0012	Lot# MB15NO2405	TC00821296	A009	0.0411	ug/ml	89575	101.89							20220328_SR2OmToxCOM
AB01974195	01	Ainno_16251	Ainnocence	AIN1-12_AINNL0012	Lot# MB15NO2405	TC00821296	A010	0.013	ug/ml	82700	94.06							20220328_SR2OmToxCOM
AB01974195	01	Ainno_16251	Ainnocence	AIN1-12_AINNL0012	Lot# MB15NO2405	TC00821296	A011	0.00411	ug/ml	84550	96.17							20220328_SR2OmToxCOM
AB01974195	01	Ainno_16251	Ainnocence	AIN1-12_AINNL0012	Lot# MB15NO2405	TC00821296	A012	0.0013	ug/ml	86800	98.73							20220328_SR2OmToxCOM
AB01974211	01	Ainno_16251	Ainnocence	AIN1-49_AINNL0049	Lot# MB15NO4149	TC00821296	A013	11.22	ug/ml	86225	98.07	>11.22	Inactive	0.13			10	20220328_SR2OmToxCOM
AB01974211	01	Ainno_16251	Ainnocence	AIN1-49_AINNL0049	Lot# MB15NO4149	TC00821296	A014	3.55	ug/ml	91025	103.54							20220328_SR2OmToxCOM
AB01974211	01	Ainno_16251	Ainnocence	AIN1-49_AINNL0049	Lot# MB15NO4149	TC00821296	A015	1.12	ug/ml	82025	93.29							20220328_SR2OmToxCOM
AB01974211	01	Ainno_16251	Ainnocence	AIN1-49_AINNL0049	Lot# MB15NO4149	TC00821296	A016	0.354	ug/ml	85450	97.19							20220328_SR2OmToxCOM
AB01974211	01	Ainno_16251	Ainnocence	AIN1-49_AINNL0049	Lot# MB15NO4149	TC00821296	A017	0.112	ug/ml	90500	102.94							20220328_SR2OmToxCOM
AB01974211	01	Ainno_16251	Ainnocence	AIN1-49_AINNL0049	Lot# MB15NO4149	TC00821296	A018	0.0354	ug/ml	87225	99.21							20220328_SR2OmToxCOM
AB01974211	01	Ainno_16251	Ainnocence	AIN1-49_AINNL0049	Lot# MB15NO4149	TC00821296	A019	0.0112	ug/ml	80450	91.5							20220328_SR2OmToxCOM
AB01974211	01	Ainno_16251	Ainnocence	AIN1-49_AINNL0049	Lot# MB15NO4149	TC00821296	A020	0.00354	ug/ml	83550	95.03							20220328_SR2OmToxCOM
AB01974211	01	Ainno_16251	Ainnocence	AIN1-49_AINNL0049	Lot# MB15NO4149	TC00821296	A021	0.00112	ug/ml	86575	98.47							20220328_SR2OmToxCOM
AB01974211	01	Ainno_16251	Ainnocence	AIN1-49_AINNL0049	Lot# MB15NO4149	TC00821296	A022	0.000354	ug/ml	84725	96.37							20220328_SR2OmToxCOM
AB01974196	01	Ainno_16251	Ainnocence	AIN1-20_AINNL0020	Lot# MB15NO2406	TC00821296	B003	45.22	ug/ml	88900	101.12	>45.22	Inactive	2.83			10	20220328_SR2OmToxCOM
AB01974196	01	Ainno_16251	Ainnocence	AIN1-20_AINNL0020	Lot# MB15NO2406	TC00821296	B004	14.3	ug/ml	87050	99.01							20220328_SR2OmToxCOM
AB01974196	01	Ainno_16251	Ainnocence	AIN1-20_AINNL0020	Lot# MB15NO2406	TC00821296	B005	4.53	ug/ml	88200	100.32							20220328_SR2OmToxCOM
AB01974196	01	Ainno_16251	Ainnocence	AIN1-20_AINNL0020	Lot# MB15NO2406	TC00821296	B006	1.43	ug/ml	85450	97.19							20220328_SR2OmToxCOM
AB01974196	01	Ainno_16251	Ainnocence	AIN1-20_AINNL0020	Lot# MB15NO2406	TC00821296	B007	0.453	ug/ml	86550	98.44							20220328_SR2OmToxCOM
AB01974196	01	Ainno_16251	Ainnocence	AIN1-20_AINNL0020	Lot# MB15NO2406	TC00821296	B008	0.143	ug/ml	86325	98.19							20220328_SR2OmToxCOM
AB01974196	01	Ainno_16251	Ainnocence	AIN1-20_AINNL0020	Lot# MB15NO2406	TC00821296	B009	0.0453	ug/ml	85250	96.96							20220328_SR2OmToxCOM
AB01974196	01	Ainno_16251	Ainnocence	AIN1-20_AINNL0020	Lot# MB15NO2406	TC00821296	B010	0.0143	ug/ml	88425	100.58							20220328_SR2OmToxCOM
AB01974196	01	Ainno_16251	Ainnocence	AIN1-20_AINNL0020	Lot# MB15NO2406	TC00821296	B011	0.00453	ug/ml	87750	99.81							20220328_SR2OmToxCOM
AB01974196	01	Ainno_16251	Ainnocence	AIN1-20_AINNL0020	Lot# MB15NO2406	TC00821296	B012	0.00143	ug/ml	84425	96.02							20220328_SR2OmToxCOM
AB01974212	01	Ainno_16251	Ainnocence	AIN1-50_AINNL0050	Lot# MB15NO4150	TC00821296	B013	11.22	ug/ml	87675	99.73	>11.22	Inactive	0.18			10	20220328_SR2OmToxCOM
AB01974212	01	Ainno_16251	Ainnocence	AIN1-50_AINNL0050	Lot# MB15NO4150	TC00821296	B014	3.55	ug/ml	89975	102.35							20220328_SR2OmToxCOM
AB01974212	01	Ainno_16251	Ainnocence	AIN1-50_AINNL0050	Lot# MB15NO4150	TC00821296	B015	1.12	ug/ml	85200	96.91							20220328_SR2OmToxCOM
AB01974212	01	Ainno_16251	Ainnocence	AIN1-50_AINNL0050	Lot# MB15NO4150	TC00821296	B016	0.354	ug/ml	85650	97.42							20220328_SR2OmToxCOM
AB01974212	01	Ainno_16251	Ainnocence	AIN1-50_AINNL0050	Lot# MB15NO4150	TC00821296	B017	0.112	ug/ml	87950	100.04							20220328_SR2OmToxCOM
AB01974212	01	Ainno_16251	Ainnocence	AIN1-50_AINNL0050	Lot# MB15NO4150	TC00821296	B018	0.0354	ug/ml	89075	101.32							20220328_SR2OmToxCOM
AB01974212	01	Ainno_16251	Ainnocence	AIN1-50_AINNL0050	Lot# MB15NO4150	TC00821296	B019	0.0112	ug/ml	87050	99.01							20220328_SR2OmToxCOM
AB01974212	01	Ainno_16251	Ainnocence	AIN1-50_AINNL0050	Lot# MB15NO4150	TC00821296	B020	0.00354	ug/ml	83350	94.8							20220328_SR2OmToxCOM
AB01974212	01	Ainno_16251	Ainnocence	AIN1-50_AINNL0050	Lot# MB15NO4150	TC00821296	B021	0.00112	ug/ml	87125	99.1							20220328_SR2OmToxCOM
AB01974212	01	Ainno_16251	Ainnocence	AIN1-50_AINNL0050	Lot# MB15NO4150	TC00821296	B022	0.000354	ug/ml	88275	100.41							20220328_SR2OmToxCOM
AB01974197	01	Ainno_16251	Ainnocence	AIN1-23_AINNL0023	Lot# MB15NO2407	TC00821296	C003	3.44	ug/ml	86750	98.67	>3.44	Inactive	0.52			10	20220328_SR2OmToxCOM
AB01974197	01	Ainno_16251	Ainnocence	AIN1-23_AINNL0023	Lot# MB15NO2407	TC00821296	C004	1.09	ug/ml	86550	98.44							20220328_SR2OmToxCOM
AB01974197	01	Ainno_16251	Ainnocence	AIN1-23_AINNL0023	Lot# MB15NO2407	TC00821296	C005	0.345	ug/ml	87525	99.56							20220328_SR2OmToxCOM
AB01974197	01	Ainno_16251	Ainnocence	AIN1-23_AINNL0023	Lot# MB15NO2407	TC00821296	C006	0.109	ug/ml	86750	98.67							20220328_SR2OmToxCOM
AB01974197	01	Ainno_16251	Ainnocence	AIN1-23_AINNL0023	Lot# MB15NO2407	TC00821296	C007	0.0345	ug/ml	84775	96.42							20220328_SR2OmToxCOM
AB01974197	01	Ainno_16251	Ainnocence	AIN1-23_AINNL0023	Lot# MB15NO2407	TC00821296	C008	0.0109	ug/ml	92275	104.97							20220328_SR2OmToxCOM
AB01974197	01	Ainno_16251	Ainnocence	AIN1-23_AINNL0023	Lot# MB15NO2407	TC00821296	C009	0.00345	ug/ml	86325	98.19							20220328_SR2OmToxCOM
AB01974197	01	Ainno_16251	Ainnocence	AIN1-23_AINNL0023	Lot# MB15NO2407	TC00821296	C010	0.00109	ug/ml	85525	97.28							20220328_SR2OmToxCOM
AB01974197	01	Ainno_16251	Ainnocence	AIN1-23_AINNL0023	Lot# MB15NO2407	TC00821296	C011	0.000345	ug/ml	85500	97.25							20220328_SR2OmToxCOM
AB01974197	01	Ainno_16251	Ainnocence	AIN1-23_AINNL0023	Lot# MB15NO2407	TC00821296	C012	0.000109	ug/ml	83000	94.4							20220328_SR2OmToxCOM
AB01974213	01	Ainno_16251	Ainnocence	AIN1-16_AINNL0016	Lot# MB15NO4116	TC00821296	C013	11.44	ug/ml	86150	97.99	>11.44	Inactive	0.43			10	20220328_SR2OmToxCOM
AB01974213	01	Ainno_16251	Ainnocence	AIN1-16_AINNL0016	Lot# MB15NO4116	TC00821296	C014	3.62	ug/ml	83300	94.74							20220328_SR2OmToxCOM
AB01974213	01	Ainno_16251	Ainnocence	AIN1-16_AINNL0016	Lot# MB15NO4116	TC00821296	C015	1.15	ug/ml	89900	102.26							20220328_SR2OmToxCOM
AB01974213	01	Ainno_16251	Ainnocence	AIN1-16_AINNL0016	Lot# MB15NO4116	TC00821296	C016	0.364	ug/ml	88000	100.1							20220328_SR2OmToxCOM
AB01974213	01	Ainno_16251	Ainnocence	AIN1-16_AINNL0016	Lot# MB15NO4116	TC00821296	C017	0.115	ug/ml	90725	103.2							20220328_SR2OmToxCOM
AB01974213	01	Ainno_16251	Ainnocence	AIN1-16_AINNL0016	Lot# MB15NO4116	TC00821296	C018	0.0364	ug/ml	84325	95.91							20220328_SR2OmToxCOM
AB01974213	01	Ainno_16251	Ainnocence	AIN1-16_AINNL0016	Lot# MB15NO4116	TC00821296	C019	0.0115	ug/ml	87200	99.18							20220328_SR2OmToxCOM
AB01974213	01	Ainno_16251	Ainnocence	AIN1-16_AINNL0016	Lot# MB15NO4116	TC00821296	C020	0.00364	ug/ml	86500	98.39							20220328_SR2OmToxCOM
AB01974213	01	Ainno_16251	Ainnocence	AIN1-16_AINNL0016	Lot# MB15NO4116	TC00821296	C021	0.00115	ug/ml	81850	93.09							20220328_SR2OmToxCOM
AB01974213	01	Ainno_16251	Ainnocence	AIN1-16_AINNL0016	Lot# MB15NO4116	TC00821296	C022	0.000364	ug/ml	82100	93.37							20220328_SR2OmToxCOM
AB01974198	01	Ainno_16251	Ainnocence	AIN1-19_AINNL0019	Lot# MB15NO4119	TC00821296	D003	11.67	ug/ml	85950	97.76	>11.67	Inactive	7.51			10	20220328_SR2OmToxCOM
AB01974198	01	Ainno_16251	Ainnocence	AIN1-19_AINNL0019	Lot# MB15NO4119	TC00821296	D004	3.69	ug/ml	89350	101.63							20220328_SR2OmToxCOM
AB01974198	01	Ainno_16251	Ainnocence	AIN1-19_AINNL0019	Lot# MB15NO4119	TC00821296	D005	1.17	ug/ml	84500	96.11							20220328_SR2OmToxCOM
AB01974198	01	Ainno_16251	Ainnocence	AIN1-19_AINNL0019	Lot# MB15NO4119	TC00821296	D006	0.37	ug/ml	84625	96.25							20220328_SR2OmToxCOM
AB01974198	01	Ainno_16251	Ainnocence	AIN1-19_AINNL0019	Lot# MB15NO4119	TC00821296	D007	0.117	ug/ml	87325	99.33							20220328_SR2OmToxCOM
AB01974198	01	Ainno_16251	Ainnocence	AIN1-19_AINNL0019	Lot# MB15NO4119	TC00821296	D008	0.037	ug/ml	86600	98.5							20220328_SR2OmToxCOM
AB01974198	01	Ainno_16251	Ainnocence	AIN1-19_AINNL0019	Lot# MB15NO4119	TC00821296	D009	0.0117	ug/ml	89925	102.29							20220328_SR2OmToxCOM
AB01974198	01	Ainno_16251	Ainnocence	AIN1-19_AINNL0019	Lot# MB15NO4119	TC00821296	D010	0.0037	ug/ml	85900	97.7							20220328_SR2OmToxCOM
AB01974198	01	Ainno_16251	Ainnocence	AIN1-19_AINNL0019	Lot# MB15NO4119	TC00821296	D011	0.00117	ug/ml	92825	105.59							20220328_SR2OmToxCOM
AB01974198	01	Ainno_16251	Ainnocence	AIN1-19_AINNL0019	Lot# MB15NO4119	TC00821296	D012	0.00037	ug/ml	85575	97.33							20220328_SR2OmToxCOM
AB01974161	01	Ainno_16251	Ainnocence	AIN2-1_REGN10933	Lot# MB15OC1436	TC00821296	D013	10	ug/ml	88125	100.24	>10.00	Inactive	0.37			10	20220328_SR2OmToxCOM
AB01974161	01	Ainno_16251	Ainnocence	AIN2-1_REGN10933	Lot# MB15OC1436	TC00821296	D014	3.16	ug/ml	89875	102.23							20220328_SR2OmToxCOM
AB01974161	01	Ainno_16251	Ainnocence	AIN2-1_REGN10933	Lot# MB15OC1436	TC00821296	D015	1	ug/ml	88450	100.61							20220328_SR2OmToxCOM
AB01974161	01	Ainno_16251	Ainnocence	AIN2-1_REGN10933	Lot# MB15OC1436	TC00821296	D016	0.316	ug/ml	89050	101.29							20220328_SR2OmToxCOM
AB01974161	01	Ainno_16251	Ainnocence	AIN2-1_REGN10933	Lot# MB15OC1436	TC00821296	D017	0.1	ug/ml	90600	103.06							20220328_SR2OmToxCOM
AB01974161	01	Ainno_16251	Ainnocence	AIN2-1_REGN10933	Lot# MB15OC1436	TC00821296	D018	0.0316	ug/ml	86750	98.67							20220328_SR2OmToxCOM
AB01974161	01	Ainno_16251	Ainnocence	AIN2-1_REGN10933	Lot# MB15OC1436	TC00821296	D019	0.01	ug/ml	85875	97.68							20220328_SR2OmToxCOM
AB01974161	01	Ainno_16251	Ainnocence	AIN2-1_REGN10933	Lot# MB15OC1436	TC00821296	D020	0.00316	ug/ml	85325	97.05							20220328_SR2OmToxCOM
AB01974161	01	Ainno_16251	Ainnocence	AIN2-1_REGN10933	Lot# MB15OC1436	TC00821296	D021	0.001	ug/ml	87800	99.87							20220328_SR2OmToxCOM
AB01974161	01	Ainno_16251	Ainnocence	AIN2-1_REGN10933	Lot# MB15OC1436	TC00821296	D022	0.000316	ug/ml	86800	98.73							20220328_SR2OmToxCOM
AB01974199	01	Ainno_16251	Ainnocence	AIN1-24_AINNL0024	Lot# MB15NO4124	TC00821296	E003	12.11	ug/ml	87850	99.93	>12.11	Inactive	0.12			10	20220328_SR2OmToxCOM
AB01974199	01	Ainno_16251	Ainnocence	AIN1-24_AINNL0024	Lot# MB15NO4124	TC00821296	E004	3.83	ug/ml	85225	96.93							20220328_SR2OmToxCOM
AB01974199	01	Ainno_16251	Ainnocence	AIN1-24_AINNL0024	Lot# MB15NO4124	TC00821296	E005	1.21	ug/ml	84475	96.08							20220328_SR2OmToxCOM
AB01974199	01	Ainno_16251	Ainnocence	AIN1-24_AINNL0024	Lot# MB15NO4124	TC00821296	E006	0.383	ug/ml	84450	96.05							20220328_SR2OmToxCOM
AB01974199	01	Ainno_16251	Ainnocence	AIN1-24_AINNL0024	Lot# MB15NO4124	TC00821296	E007	0.121	ug/ml	90150	102.55							20220328_SR2OmToxCOM
AB01974199	01	Ainno_16251	Ainnocence	AIN1-24_AINNL0024	Lot# MB15NO4124	TC00821296	E008	0.0383	ug/ml	88425	100.58							20220328_SR2OmToxCOM
AB01974199	01	Ainno_16251	Ainnocence	AIN1-24_AINNL0024	Lot# MB15NO4124	TC00821296	E009	0.0121	ug/ml	83275	94.71							20220328_SR2OmToxCOM
AB01974199	01	Ainno_16251	Ainnocence	AIN1-24_AINNL0024	Lot# MB15NO4124	TC00821296	E010	0.00383	ug/ml	84700	96.34							20220328_SR2OmToxCOM
AB01974199	01	Ainno_16251	Ainnocence	AIN1-24_AINNL0024	Lot# MB15NO4124	TC00821296	E011	0.00121	ug/ml	86550	98.44							20220328_SR2OmToxCOM
AB01974199	01	Ainno_16251	Ainnocence	AIN1-24_AINNL0024	Lot# MB15NO4124	TC00821296	E012	0.000383	ug/ml	84000	95.54							20220328_SR2OmToxCOM
AB01974162	01	Ainno_16251	Ainnocence	AIN2-2_REGN10987	Lot# MB15OC1437	TC00821296	E013	10	ug/ml	88975	101.21	>10.00	Inactive	-1			10	20220328_SR2OmToxCOM
AB01974162	01	Ainno_16251	Ainnocence	AIN2-2_REGN10987	Lot# MB15OC1437	TC00821296	E014	3.16	ug/ml	81900	93.15							20220328_SR2OmToxCOM
AB01974162	01	Ainno_16251	Ainnocence	AIN2-2_REGN10987	Lot# MB15OC1437	TC00821296	E015	1	ug/ml	87575	99.61							20220328_SR2OmToxCOM
AB01974162	01	Ainno_16251	Ainnocence	AIN2-2_REGN10987	Lot# MB15OC1437	TC00821296	E016	0.316	ug/ml	88250	100.38							20220328_SR2OmToxCOM
AB01974162	01	Ainno_16251	Ainnocence	AIN2-2_REGN10987	Lot# MB15OC1437	TC00821296	E017	0.1	ug/ml	87000	98.96							20220328_SR2OmToxCOM
AB01974162	01	Ainno_16251	Ainnocence	AIN2-2_REGN10987	Lot# MB15OC1437	TC00821296	E018	0.0316	ug/ml	89050	101.29							20220328_SR2OmToxCOM
AB01974162	01	Ainno_16251	Ainnocence	AIN2-2_REGN10987	Lot# MB15OC1437	TC00821296	E019	0.01	ug/ml	85700	97.48							20220328_SR2OmToxCOM
AB01974162	01	Ainno_16251	Ainnocence	AIN2-2_REGN10987	Lot# MB15OC1437	TC00821296	E020	0.00316	ug/ml	85675	97.45							20220328_SR2OmToxCOM
AB01974162	01	Ainno_16251	Ainnocence	AIN2-2_REGN10987	Lot# MB15OC1437	TC00821296	E021	0.001	ug/ml	85675	97.45							20220328_SR2OmToxCOM
AB01974162	01	Ainno_16251	Ainnocence	AIN2-2_REGN10987	Lot# MB15OC1437	TC00821296	E022	0.000316	ug/ml	87825	99.9							20220328_SR2OmToxCOM
AB01974200	01	Ainno_16251	Ainnocence	AIN1-25_AINNL0025	Lot# MB15NO4125	TC00821296	F003	7.67	ug/ml	92175	104.85	>7.67	Inactive	0.38			10	20220328_SR2OmToxCOM
AB01974200	01	Ainno_16251	Ainnocence	AIN1-25_AINNL0025	Lot# MB15NO4125	TC00821296	F004	2.43	ug/ml	86850	98.79							20220328_SR2OmToxCOM
AB01974200	01	Ainno_16251	Ainnocence	AIN1-25_AINNL0025	Lot# MB15NO4125	TC00821296	F005	0.769	ug/ml	90975	103.49							20220328_SR2OmToxCOM
AB01974200	01	Ainno_16251	Ainnocence	AIN1-25_AINNL0025	Lot# MB15NO4125	TC00821296	F006	0.243	ug/ml	87300	99.3							20220328_SR2OmToxCOM
AB01974200	01	Ainno_16251	Ainnocence	AIN1-25_AINNL0025	Lot# MB15NO4125	TC00821296	F007	0.0769	ug/ml	89300	101.58							20220328_SR2OmToxCOM
AB01974200	01	Ainno_16251	Ainnocence	AIN1-25_AINNL0025	Lot# MB15NO4125	TC00821296	F008	0.0243	ug/ml	86150	97.99							20220328_SR2OmToxCOM
AB01974200	01	Ainno_16251	Ainnocence	AIN1-25_AINNL0025	Lot# MB15NO4125	TC00821296	F009	0.00769	ug/ml	83425	94.88							20220328_SR2OmToxCOM
AB01974200	01	Ainno_16251	Ainnocence	AIN1-25_AINNL0025	Lot# MB15NO4125	TC00821296	F010	0.00243	ug/ml	86250	98.1							20220328_SR2OmToxCOM
AB01974200	01	Ainno_16251	Ainnocence	AIN1-25_AINNL0025	Lot# MB15NO4125	TC00821296	F011	0.000769	ug/ml	88125	100.24							20220328_SR2OmToxCOM
AB01974200	01	Ainno_16251	Ainnocence	AIN1-25_AINNL0025	Lot# MB15NO4125	TC00821296	F012	0.000243	ug/ml	84050	95.6							20220328_SR2OmToxCOM
AB01974201	01	Ainno_16251	Ainnocence	AIN1-27_AINNL0027	Lot# MB15NO1901	TC00821296	G003	1.44	ug/ml	87975	100.07	>1.44	Inactive	1.19			10	20220328_SR2OmToxCOM
AB01974201	01	Ainno_16251	Ainnocence	AIN1-27_AINNL0027	Lot# MB15NO1901	TC00821296	G004	0.456	ug/ml	89250	101.52							20220328_SR2OmToxCOM
AB01974201	01	Ainno_16251	Ainnocence	AIN1-27_AINNL0027	Lot# MB15NO1901	TC00821296	G005	0.144	ug/ml	83975	95.51							20220328_SR2OmToxCOM
AB01974201	01	Ainno_16251	Ainnocence	AIN1-27_AINNL0027	Lot# MB15NO1901	TC00821296	G006	0.0456	ug/ml	89325	101.61							20220328_SR2OmToxCOM
AB01974201	01	Ainno_16251	Ainnocence	AIN1-27_AINNL0027	Lot# MB15NO1901	TC00821296	G007	0.0144	ug/ml	90525	102.97							20220328_SR2OmToxCOM
AB01974201	01	Ainno_16251	Ainnocence	AIN1-27_AINNL0027	Lot# MB15NO1901	TC00821296	G008	0.00456	ug/ml	84325	95.91							20220328_SR2OmToxCOM
AB01974201	01	Ainno_16251	Ainnocence	AIN1-27_AINNL0027	Lot# MB15NO1901	TC00821296	G009	0.00144	ug/ml	84575	96.19							20220328_SR2OmToxCOM
AB01974201	01	Ainno_16251	Ainnocence	AIN1-27_AINNL0027	Lot# MB15NO1901	TC00821296	G010	0.000456	ug/ml	85200	96.91							20220328_SR2OmToxCOM
AB01974201	01	Ainno_16251	Ainnocence	AIN1-27_AINNL0027	Lot# MB15NO1901	TC00821296	G011	0.000144	ug/ml	88675	100.87							20220328_SR2OmToxCOM
AB01974201	01	Ainno_16251	Ainnocence	AIN1-27_AINNL0027	Lot# MB15NO1901	TC00821296	G012	4.6e-05	ug/ml	88800	101.01							20220328_SR2OmToxCOM
AB01974202	01	Ainno_16251	Ainnocence	AIN1-34_AINNL0034	Lot# MB15NO1902	TC00821296	H003	2.56	ug/ml	88300	100.44	>2.56	Inactive	0.45			10	20220328_SR2OmToxCOM
AB01974202	01	Ainno_16251	Ainnocence	AIN1-34_AINNL0034	Lot# MB15NO1902	TC00821296	H004	0.81	ug/ml	87700	99.75							20220328_SR2OmToxCOM
AB01974202	01	Ainno_16251	Ainnocence	AIN1-34_AINNL0034	Lot# MB15NO1902	TC00821296	H005	0.256	ug/ml	86600	98.5							20220328_SR2OmToxCOM
AB01974202	01	Ainno_16251	Ainnocence	AIN1-34_AINNL0034	Lot# MB15NO1902	TC00821296	H006	0.081	ug/ml	89625	101.95							20220328_SR2OmToxCOM
AB01974202	01	Ainno_16251	Ainnocence	AIN1-34_AINNL0034	Lot# MB15NO1902	TC00821296	H007	0.0256	ug/ml	87475	99.5							20220328_SR2OmToxCOM
AB01974202	01	Ainno_16251	Ainnocence	AIN1-34_AINNL0034	Lot# MB15NO1902	TC00821296	H008	0.0081	ug/ml	88750	100.95							20220328_SR2OmToxCOM
AB01974202	01	Ainno_16251	Ainnocence	AIN1-34_AINNL0034	Lot# MB15NO1902	TC00821296	H009	0.00256	ug/ml	87550	99.58							20220328_SR2OmToxCOM
AB01974202	01	Ainno_16251	Ainnocence	AIN1-34_AINNL0034	Lot# MB15NO1902	TC00821296	H010	0.00081	ug/ml	89300	101.58							20220328_SR2OmToxCOM
AB01974202	01	Ainno_16251	Ainnocence	AIN1-34_AINNL0034	Lot# MB15NO1902	TC00821296	H011	0.000256	ug/ml	87825	99.9							20220328_SR2OmToxCOM
AB01974202	01	Ainno_16251	Ainnocence	AIN1-34_AINNL0034	Lot# MB15NO1902	TC00821296	H012	8.1e-05	ug/ml	89900	102.26							20220328_SR2OmToxCOM
AB01974203	01	Ainno_16251	Ainnocence	AIN1-35_AINNL0035	Lot# MB15NO1903	TC00821296	I003	2.33	ug/ml	90425	102.86	>2.33	Inactive	0.24			10	20220328_SR2OmToxCOM
AB01974203	01	Ainno_16251	Ainnocence	AIN1-35_AINNL0035	Lot# MB15NO1903	TC00821296	I004	0.737	ug/ml	83125	94.54							20220328_SR2OmToxCOM
AB01974203	01	Ainno_16251	Ainnocence	AIN1-35_AINNL0035	Lot# MB15NO1903	TC00821296	I005	0.233	ug/ml	88600	100.78							20220328_SR2OmToxCOM
AB01974203	01	Ainno_16251	Ainnocence	AIN1-35_AINNL0035	Lot# MB15NO1903	TC00821296	I006	0.0737	ug/ml	85150	96.85							20220328_SR2OmToxCOM
AB01974203	01	Ainno_16251	Ainnocence	AIN1-35_AINNL0035	Lot# MB15NO1903	TC00821296	I007	0.0233	ug/ml	87525	99.56							20220328_SR2OmToxCOM
AB01974203	01	Ainno_16251	Ainnocence	AIN1-35_AINNL0035	Lot# MB15NO1903	TC00821296	I008	0.00737	ug/ml	86700	98.62							20220328_SR2OmToxCOM
AB01974203	01	Ainno_16251	Ainnocence	AIN1-35_AINNL0035	Lot# MB15NO1903	TC00821296	I009	0.00233	ug/ml	83925	95.45							20220328_SR2OmToxCOM
AB01974203	01	Ainno_16251	Ainnocence	AIN1-35_AINNL0035	Lot# MB15NO1903	TC00821296	I010	0.000737	ug/ml	87850	99.93							20220328_SR2OmToxCOM
AB01974203	01	Ainno_16251	Ainnocence	AIN1-35_AINNL0035	Lot# MB15NO1903	TC00821296	I011	0.000233	ug/ml	84100	95.65							20220328_SR2OmToxCOM
AB01974203	01	Ainno_16251	Ainnocence	AIN1-35_AINNL0035	Lot# MB15NO1903	TC00821296	I012	7.4e-05	ug/ml	86000	97.82							20220328_SR2OmToxCOM
AB01974204	01	Ainno_16251	Ainnocence	AIN1-37_AINNL0037	Lot# MB15NO1904	TC00821296	J003	2.11	ug/ml	84525	96.14	>2.11	Inactive	<-1000			10	20220328_SR2OmToxCOM
AB01974204	01	Ainno_16251	Ainnocence	AIN1-37_AINNL0037	Lot# MB15NO1904	TC00821296	J004	0.668	ug/ml	93850	106.76							20220328_SR2OmToxCOM
AB01974204	01	Ainno_16251	Ainnocence	AIN1-37_AINNL0037	Lot# MB15NO1904	TC00821296	J005	0.211	ug/ml	90150	102.55							20220328_SR2OmToxCOM
AB01974204	01	Ainno_16251	Ainnocence	AIN1-37_AINNL0037	Lot# MB15NO1904	TC00821296	J006	0.0668	ug/ml	86300	98.16							20220328_SR2OmToxCOM
AB01974204	01	Ainno_16251	Ainnocence	AIN1-37_AINNL0037	Lot# MB15NO1904	TC00821296	J007	0.0211	ug/ml	87275	99.27							20220328_SR2OmToxCOM
AB01974204	01	Ainno_16251	Ainnocence	AIN1-37_AINNL0037	Lot# MB15NO1904	TC00821296	J008	0.00668	ug/ml	86100	97.93							20220328_SR2OmToxCOM
AB01974204	01	Ainno_16251	Ainnocence	AIN1-37_AINNL0037	Lot# MB15NO1904	TC00821296	J009	0.00211	ug/ml	88300	100.44							20220328_SR2OmToxCOM
AB01974204	01	Ainno_16251	Ainnocence	AIN1-37_AINNL0037	Lot# MB15NO1904	TC00821296	J010	0.000668	ug/ml	86800	98.73							20220328_SR2OmToxCOM
AB01974204	01	Ainno_16251	Ainnocence	AIN1-37_AINNL0037	Lot# MB15NO1904	TC00821296	J011	0.000211	ug/ml	89300	101.58							20220328_SR2OmToxCOM
AB01974204	01	Ainno_16251	Ainnocence	AIN1-37_AINNL0037	Lot# MB15NO1904	TC00821296	J012	6.7e-05	ug/ml	87700	99.75							20220328_SR2OmToxCOM
AB01974205	01	Ainno_16251	Ainnocence	AIN1-43_AINNL0043	Lot# MB15NO4143	TC00821296	K003	12.33	ug/ml	91425	104	>12.33	Inactive	0.3			10	20220328_SR2OmToxCOM
AB01974205	01	Ainno_16251	Ainnocence	AIN1-43_AINNL0043	Lot# MB15NO4143	TC00821296	K004	3.9	ug/ml	86500	98.39							20220328_SR2OmToxCOM
AB01974205	01	Ainno_16251	Ainnocence	AIN1-43_AINNL0043	Lot# MB15NO4143	TC00821296	K005	1.23	ug/ml	89725	102.06							20220328_SR2OmToxCOM
AB01974205	01	Ainno_16251	Ainnocence	AIN1-43_AINNL0043	Lot# MB15NO4143	TC00821296	K006	0.389	ug/ml	89350	101.63							20220328_SR2OmToxCOM
AB01974205	01	Ainno_16251	Ainnocence	AIN1-43_AINNL0043	Lot# MB15NO4143	TC00821296	K007	0.123	ug/ml	87325	99.33							20220328_SR2OmToxCOM
AB01974205	01	Ainno_16251	Ainnocence	AIN1-43_AINNL0043	Lot# MB15NO4143	TC00821296	K008	0.0389	ug/ml	87125	99.1							20220328_SR2OmToxCOM
AB01974205	01	Ainno_16251	Ainnocence	AIN1-43_AINNL0043	Lot# MB15NO4143	TC00821296	K009	0.0123	ug/ml	87575	99.61							20220328_SR2OmToxCOM
AB01974205	01	Ainno_16251	Ainnocence	AIN1-43_AINNL0043	Lot# MB15NO4143	TC00821296	K010	0.00389	ug/ml	84375	95.97							20220328_SR2OmToxCOM
AB01974205	01	Ainno_16251	Ainnocence	AIN1-43_AINNL0043	Lot# MB15NO4143	TC00821296	K011	0.00123	ug/ml	88275	100.41							20220328_SR2OmToxCOM
AB01974205	01	Ainno_16251	Ainnocence	AIN1-43_AINNL0043	Lot# MB15NO4143	TC00821296	K012	0.000389	ug/ml	87600	99.64							20220328_SR2OmToxCOM
AB01974206	01	Ainno_16251	Ainnocence	AIN1-44_AINNL0044	Lot# MB15NO4144	TC00821296	L003	11.44	ug/ml	88375	100.52	>11.44	Inactive	0.23			10	20220328_SR2OmToxCOM
AB01974206	01	Ainno_16251	Ainnocence	AIN1-44_AINNL0044	Lot# MB15NO4144	TC00821296	L004	3.62	ug/ml	94525	107.53							20220328_SR2OmToxCOM
AB01974206	01	Ainno_16251	Ainnocence	AIN1-44_AINNL0044	Lot# MB15NO4144	TC00821296	L005	1.15	ug/ml	85625	97.39							20220328_SR2OmToxCOM
AB01974206	01	Ainno_16251	Ainnocence	AIN1-44_AINNL0044	Lot# MB15NO4144	TC00821296	L006	0.364	ug/ml	84775	96.42							20220328_SR2OmToxCOM
AB01974206	01	Ainno_16251	Ainnocence	AIN1-44_AINNL0044	Lot# MB15NO4144	TC00821296	L007	0.115	ug/ml	84775	96.42							20220328_SR2OmToxCOM
AB01974206	01	Ainno_16251	Ainnocence	AIN1-44_AINNL0044	Lot# MB15NO4144	TC00821296	L008	0.0364	ug/ml	84525	96.14							20220328_SR2OmToxCOM
AB01974206	01	Ainno_16251	Ainnocence	AIN1-44_AINNL0044	Lot# MB15NO4144	TC00821296	L009	0.0115	ug/ml	86075	97.9							20220328_SR2OmToxCOM
AB01974206	01	Ainno_16251	Ainnocence	AIN1-44_AINNL0044	Lot# MB15NO4144	TC00821296	L010	0.00364	ug/ml	86600	98.5							20220328_SR2OmToxCOM
AB01974206	01	Ainno_16251	Ainnocence	AIN1-44_AINNL0044	Lot# MB15NO4144	TC00821296	L011	0.00115	ug/ml	83275	94.71							20220328_SR2OmToxCOM
AB01974206	01	Ainno_16251	Ainnocence	AIN1-44_AINNL0044	Lot# MB15NO4144	TC00821296	L012	0.000364	ug/ml	83975	95.51							20220328_SR2OmToxCOM
AB01974207	01	Ainno_16251	Ainnocence	AIN1-45_AINNL0045	Lot# MB15NO4145	TC00821296	M003	11.44	ug/ml	87775	99.84	>11.44	Inactive	2.96			10	20220328_SR2OmToxCOM
AB01974207	01	Ainno_16251	Ainnocence	AIN1-45_AINNL0045	Lot# MB15NO4145	TC00821296	M004	3.62	ug/ml	90925	103.43							20220328_SR2OmToxCOM
AB01974207	01	Ainno_16251	Ainnocence	AIN1-45_AINNL0045	Lot# MB15NO4145	TC00821296	M005	1.15	ug/ml	89550	101.86							20220328_SR2OmToxCOM
AB01974207	01	Ainno_16251	Ainnocence	AIN1-45_AINNL0045	Lot# MB15NO4145	TC00821296	M006	0.364	ug/ml	88650	100.84							20220328_SR2OmToxCOM
AB01974207	01	Ainno_16251	Ainnocence	AIN1-45_AINNL0045	Lot# MB15NO4145	TC00821296	M007	0.115	ug/ml	89150	101.41							20220328_SR2OmToxCOM
AB01974207	01	Ainno_16251	Ainnocence	AIN1-45_AINNL0045	Lot# MB15NO4145	TC00821296	M008	0.0364	ug/ml	89875	102.23							20220328_SR2OmToxCOM
AB01974207	01	Ainno_16251	Ainnocence	AIN1-45_AINNL0045	Lot# MB15NO4145	TC00821296	M009	0.0115	ug/ml	89350	101.63							20220328_SR2OmToxCOM
AB01974207	01	Ainno_16251	Ainnocence	AIN1-45_AINNL0045	Lot# MB15NO4145	TC00821296	M010	0.00364	ug/ml	93025	105.82							20220328_SR2OmToxCOM
AB01974207	01	Ainno_16251	Ainnocence	AIN1-45_AINNL0045	Lot# MB15NO4145	TC00821296	M011	0.00115	ug/ml	87550	99.58							20220328_SR2OmToxCOM
AB01974207	01	Ainno_16251	Ainnocence	AIN1-45_AINNL0045	Lot# MB15NO4145	TC00821296	M012	0.000364	ug/ml	85700	97.48							20220328_SR2OmToxCOM
AB01974208	01	Ainno_16251	Ainnocence	AIN1-46_AINNL0046	Lot# MB15NO4146	TC00821296	N003	13.11	ug/ml	86200	98.05	>13.11	Inactive	1.84			10	20220328_SR2OmToxCOM
AB01974208	01	Ainno_16251	Ainnocence	AIN1-46_AINNL0046	Lot# MB15NO4146	TC00821296	N004	4.15	ug/ml	85875	97.68							20220328_SR2OmToxCOM
AB01974208	01	Ainno_16251	Ainnocence	AIN1-46_AINNL0046	Lot# MB15NO4146	TC00821296	N005	1.31	ug/ml	90225	102.63							20220328_SR2OmToxCOM
AB01974208	01	Ainno_16251	Ainnocence	AIN1-46_AINNL0046	Lot# MB15NO4146	TC00821296	N006	0.415	ug/ml	83350	94.8							20220328_SR2OmToxCOM
AB01974208	01	Ainno_16251	Ainnocence	AIN1-46_AINNL0046	Lot# MB15NO4146	TC00821296	N007	0.131	ug/ml	87925	100.01							20220328_SR2OmToxCOM
AB01974208	01	Ainno_16251	Ainnocence	AIN1-46_AINNL0046	Lot# MB15NO4146	TC00821296	N008	0.0415	ug/ml	88250	100.38							20220328_SR2OmToxCOM
AB01974208	01	Ainno_16251	Ainnocence	AIN1-46_AINNL0046	Lot# MB15NO4146	TC00821296	N009	0.0131	ug/ml	94275	107.24							20220328_SR2OmToxCOM
AB01974208	01	Ainno_16251	Ainnocence	AIN1-46_AINNL0046	Lot# MB15NO4146	TC00821296	N010	0.00415	ug/ml	89425	101.72							20220328_SR2OmToxCOM
AB01974208	01	Ainno_16251	Ainnocence	AIN1-46_AINNL0046	Lot# MB15NO4146	TC00821296	N011	0.00131	ug/ml	85750	97.53							20220328_SR2OmToxCOM
AB01974208	01	Ainno_16251	Ainnocence	AIN1-46_AINNL0046	Lot# MB15NO4146	TC00821296	N012	0.000415	ug/ml	90400	102.83							20220328_SR2OmToxCOM
AB01974209	01	Ainno_16251	Ainnocence	AIN1-47_AINNL0047	Lot# MB15NO4147	TC00821296	O003	24.78	ug/ml	87950	100.04	>24.78	Inactive	1.47			10	20220328_SR2OmToxCOM
AB01974209	01	Ainno_16251	Ainnocence	AIN1-47_AINNL0047	Lot# MB15NO4147	TC00821296	O004	7.84	ug/ml	89475	101.78							20220328_SR2OmToxCOM
AB01974209	01	Ainno_16251	Ainnocence	AIN1-47_AINNL0047	Lot# MB15NO4147	TC00821296	O005	2.48	ug/ml	88925	101.15							20220328_SR2OmToxCOM
AB01974209	01	Ainno_16251	Ainnocence	AIN1-47_AINNL0047	Lot# MB15NO4147	TC00821296	O006	0.785	ug/ml	85925	97.73							20220328_SR2OmToxCOM
AB01974209	01	Ainno_16251	Ainnocence	AIN1-47_AINNL0047	Lot# MB15NO4147	TC00821296	O007	0.248	ug/ml	85125	96.82							20220328_SR2OmToxCOM
AB01974209	01	Ainno_16251	Ainnocence	AIN1-47_AINNL0047	Lot# MB15NO4147	TC00821296	O008	0.0785	ug/ml	89625	101.95							20220328_SR2OmToxCOM
AB01974209	01	Ainno_16251	Ainnocence	AIN1-47_AINNL0047	Lot# MB15NO4147	TC00821296	O009	0.0248	ug/ml	86975	98.93							20220328_SR2OmToxCOM
AB01974209	01	Ainno_16251	Ainnocence	AIN1-47_AINNL0047	Lot# MB15NO4147	TC00821296	O010	0.00785	ug/ml	91725	104.34							20220328_SR2OmToxCOM
AB01974209	01	Ainno_16251	Ainnocence	AIN1-47_AINNL0047	Lot# MB15NO4147	TC00821296	O011	0.00248	ug/ml	86825	98.76							20220328_SR2OmToxCOM
AB01974209	01	Ainno_16251	Ainnocence	AIN1-47_AINNL0047	Lot# MB15NO4147	TC00821296	O012	0.000785	ug/ml	90625	103.09							20220328_SR2OmToxCOM
AB01974210	01	Ainno_16251	Ainnocence	AIN1-48_AINNL0048	Lot# MB15NO4148	TC00821296	P003	11	ug/ml	85975	97.79	>11.00	Inactive	6.35			10	20220328_SR2OmToxCOM
AB01974210	01	Ainno_16251	Ainnocence	AIN1-48_AINNL0048	Lot# MB15NO4148	TC00821296	P004	3.48	ug/ml	87375	99.38							20220328_SR2OmToxCOM
AB01974210	01	Ainno_16251	Ainnocence	AIN1-48_AINNL0048	Lot# MB15NO4148	TC00821296	P005	1.1	ug/ml	86725	98.64							20220328_SR2OmToxCOM
AB01974210	01	Ainno_16251	Ainnocence	AIN1-48_AINNL0048	Lot# MB15NO4148	TC00821296	P006	0.348	ug/ml	84925	96.59							20220328_SR2OmToxCOM
AB01974210	01	Ainno_16251	Ainnocence	AIN1-48_AINNL0048	Lot# MB15NO4148	TC00821296	P007	0.11	ug/ml	90300	102.72							20220328_SR2OmToxCOM
AB01974210	01	Ainno_16251	Ainnocence	AIN1-48_AINNL0048	Lot# MB15NO4148	TC00821296	P008	0.0348	ug/ml	87625	99.67							20220328_SR2OmToxCOM
AB01974210	01	Ainno_16251	Ainnocence	AIN1-48_AINNL0048	Lot# MB15NO4148	TC00821296	P009	0.011	ug/ml	85600	97.36							20220328_SR2OmToxCOM
AB01974210	01	Ainno_16251	Ainnocence	AIN1-48_AINNL0048	Lot# MB15NO4148	TC00821296	P010	0.00348	ug/ml	87050	99.01							20220328_SR2OmToxCOM
AB01974210	01	Ainno_16251	Ainnocence	AIN1-48_AINNL0048	Lot# MB15NO4148	TC00821296	P011	0.0011	ug/ml	89075	101.32							20220328_SR2OmToxCOM
AB01974210	01	Ainno_16251	Ainnocence	AIN1-48_AINNL0048	Lot# MB15NO4148	TC00821296	P012	0.000348	ug/ml	86100	97.93							20220328_SR2OmToxCOM
AB01974587	01	Ainno_16335	Ainnocence	22AIN4-1		TC00821299	A003	11	ug/ml	87075	100.13	>11.00	Inactive	<-1000			10	20220328_SR2OmToxCOM
AB01974587	01	Ainno_16335	Ainnocence	22AIN4-1		TC00821299	A004	3.48	ug/ml	88075	101.28							20220328_SR2OmToxCOM
AB01974587	01	Ainno_16335	Ainnocence	22AIN4-1		TC00821299	A005	1.1	ug/ml	86350	99.29							20220328_SR2OmToxCOM
AB01974587	01	Ainno_16335	Ainnocence	22AIN4-1		TC00821299	A006	0.348	ug/ml	91975	105.77							20220328_SR2OmToxCOM
AB01974587	01	Ainno_16335	Ainnocence	22AIN4-1		TC00821299	A007	0.11	ug/ml	85525	98.34							20220328_SR2OmToxCOM
AB01974587	01	Ainno_16335	Ainnocence	22AIN4-1		TC00821299	A008	0.0348	ug/ml	87075	100.13							20220328_SR2OmToxCOM
AB01974587	01	Ainno_16335	Ainnocence	22AIN4-1		TC00821299	A009	0.011	ug/ml	86800	99.81							20220328_SR2OmToxCOM
AB01974587	01	Ainno_16335	Ainnocence	22AIN4-1		TC00821299	A010	0.00348	ug/ml	85200	97.97							20220328_SR2OmToxCOM
AB01974587	01	Ainno_16335	Ainnocence	22AIN4-1		TC00821299	A011	0.0011	ug/ml	91350	105.05							20220328_SR2OmToxCOM
AB01974587	01	Ainno_16335	Ainnocence	22AIN4-1		TC00821299	A012	0.000348	ug/ml	86425	99.38							20220328_SR2OmToxCOM
AB01974603	01	Ainno_16335	Ainnocence	22AIN4-17		TC00821299	A013	11.44	ug/ml	89500	102.92	>11.44	Inactive	5.69			10	20220328_SR2OmToxCOM
AB01974603	01	Ainno_16335	Ainnocence	22AIN4-17		TC00821299	A014	3.62	ug/ml	90700	104.3							20220328_SR2OmToxCOM
AB01974603	01	Ainno_16335	Ainnocence	22AIN4-17		TC00821299	A015	1.15	ug/ml	87975	101.17							20220328_SR2OmToxCOM
AB01974603	01	Ainno_16335	Ainnocence	22AIN4-17		TC00821299	A016	0.364	ug/ml	88600	101.89							20220328_SR2OmToxCOM
AB01974603	01	Ainno_16335	Ainnocence	22AIN4-17		TC00821299	A017	0.115	ug/ml	91025	104.68							20220328_SR2OmToxCOM
AB01974603	01	Ainno_16335	Ainnocence	22AIN4-17		TC00821299	A018	0.0364	ug/ml	90850	104.48							20220328_SR2OmToxCOM
AB01974603	01	Ainno_16335	Ainnocence	22AIN4-17		TC00821299	A019	0.0115	ug/ml	85750	98.6							20220328_SR2OmToxCOM
AB01974603	01	Ainno_16335	Ainnocence	22AIN4-17		TC00821299	A020	0.00364	ug/ml	84925	97.65							20220328_SR2OmToxCOM
AB01974603	01	Ainno_16335	Ainnocence	22AIN4-17		TC00821299	A021	0.00115	ug/ml	87750	100.91							20220328_SR2OmToxCOM
AB01974603	01	Ainno_16335	Ainnocence	22AIN4-17		TC00821299	A022	0.000364	ug/ml	84600	97.28							20220328_SR2OmToxCOM
AB01974588	01	Ainno_16335	Ainnocence	22AIN4-2		TC00821299	B003	12.11	ug/ml	87550	100.68	>12.11	Inactive	<-1000			10	20220328_SR2OmToxCOM
AB01974588	01	Ainno_16335	Ainnocence	22AIN4-2		TC00821299	B004	3.83	ug/ml	87925	101.11							20220328_SR2OmToxCOM
AB01974588	01	Ainno_16335	Ainnocence	22AIN4-2		TC00821299	B005	1.21	ug/ml	87050	100.1							20220328_SR2OmToxCOM
AB01974588	01	Ainno_16335	Ainnocence	22AIN4-2		TC00821299	B006	0.383	ug/ml	85725	98.57							20220328_SR2OmToxCOM
AB01974588	01	Ainno_16335	Ainnocence	22AIN4-2		TC00821299	B007	0.121	ug/ml	90050	103.56							20220328_SR2OmToxCOM
AB01974588	01	Ainno_16335	Ainnocence	22AIN4-2		TC00821299	B008	0.0383	ug/ml	88750	102.06							20220328_SR2OmToxCOM
AB01974588	01	Ainno_16335	Ainnocence	22AIN4-2		TC00821299	B009	0.0121	ug/ml	90900	104.54							20220328_SR2OmToxCOM
AB01974588	01	Ainno_16335	Ainnocence	22AIN4-2		TC00821299	B010	0.00383	ug/ml	87250	100.33							20220328_SR2OmToxCOM
AB01974588	01	Ainno_16335	Ainnocence	22AIN4-2		TC00821299	B011	0.00121	ug/ml	85875	98.75							20220328_SR2OmToxCOM
AB01974588	01	Ainno_16335	Ainnocence	22AIN4-2		TC00821299	B012	0.000383	ug/ml	87100	100.16							20220328_SR2OmToxCOM
AB01974604	01	Ainno_16335	Ainnocence	22AIN4-18		TC00821299	B013	11.56	ug/ml	87025	100.07	>11.56	Inactive	<-1000			10	20220328_SR2OmToxCOM
AB01974604	01	Ainno_16335	Ainnocence	22AIN4-18		TC00821299	B014	3.66	ug/ml	97050	111.62							20220328_SR2OmToxCOM
AB01974604	01	Ainno_16335	Ainnocence	22AIN4-18		TC00821299	B015	1.16	ug/ml	93075	107.04							20220328_SR2OmToxCOM
AB01974604	01	Ainno_16335	Ainnocence	22AIN4-18		TC00821299	B016	0.367	ug/ml	89875	103.35							20220328_SR2OmToxCOM
AB01974604	01	Ainno_16335	Ainnocence	22AIN4-18		TC00821299	B017	0.116	ug/ml	89225	102.61							20220328_SR2OmToxCOM
AB01974604	01	Ainno_16335	Ainnocence	22AIN4-18		TC00821299	B018	0.0367	ug/ml	88300	101.54							20220328_SR2OmToxCOM
AB01974604	01	Ainno_16335	Ainnocence	22AIN4-18		TC00821299	B019	0.0116	ug/ml	88950	102.29							20220328_SR2OmToxCOM
AB01974604	01	Ainno_16335	Ainnocence	22AIN4-18		TC00821299	B020	0.00367	ug/ml	89675	103.12							20220328_SR2OmToxCOM
AB01974604	01	Ainno_16335	Ainnocence	22AIN4-18		TC00821299	B021	0.00116	ug/ml	87725	100.88							20220328_SR2OmToxCOM
AB01974604	01	Ainno_16335	Ainnocence	22AIN4-18		TC00821299	B022	0.000367	ug/ml	87900	101.08							20220328_SR2OmToxCOM
AB01974589	01	Ainno_16335	Ainnocence	22AIN4-3		TC00821299	C003	10.89	ug/ml	91825	105.6	>10.89	Inactive	48.81			10	20220328_SR2OmToxCOM
AB01974589	01	Ainno_16335	Ainnocence	22AIN4-3		TC00821299	C004	3.45	ug/ml	84725	97.42							20220328_SR2OmToxCOM
AB01974589	01	Ainno_16335	Ainnocence	22AIN4-3		TC00821299	C005	1.09	ug/ml	87725	100.88							20220328_SR2OmToxCOM
AB01974589	01	Ainno_16335	Ainnocence	22AIN4-3		TC00821299	C006	0.345	ug/ml	89250	102.63							20220328_SR2OmToxCOM
AB01974589	01	Ainno_16335	Ainnocence	22AIN4-3		TC00821299	C007	0.109	ug/ml	86900	99.93							20220328_SR2OmToxCOM
AB01974589	01	Ainno_16335	Ainnocence	22AIN4-3		TC00821299	C008	0.0345	ug/ml	89900	103.38							20220328_SR2OmToxCOM
AB01974589	01	Ainno_16335	Ainnocence	22AIN4-3		TC00821299	C009	0.0109	ug/ml	94675	108.88							20220328_SR2OmToxCOM
AB01974589	01	Ainno_16335	Ainnocence	22AIN4-3		TC00821299	C010	0.00345	ug/ml	89625	103.07							20220328_SR2OmToxCOM
AB01974589	01	Ainno_16335	Ainnocence	22AIN4-3		TC00821299	C011	0.00109	ug/ml	90325	103.87							20220328_SR2OmToxCOM
AB01974589	01	Ainno_16335	Ainnocence	22AIN4-3		TC00821299	C012	0.000345	ug/ml	87150	100.22							20220328_SR2OmToxCOM
AB01974605	01	Ainno_16335	Ainnocence	22AIN4-19		TC00821299	C013	13.56	ug/ml	88350	101.6	>13.56	Inactive	0.37			10	20220328_SR2OmToxCOM
AB01974605	01	Ainno_16335	Ainnocence	22AIN4-19		TC00821299	C014	4.29	ug/ml	84775	97.48							20220328_SR2OmToxCOM
AB01974605	01	Ainno_16335	Ainnocence	22AIN4-19		TC00821299	C015	1.36	ug/ml	89175	102.55							20220328_SR2OmToxCOM
AB01974605	01	Ainno_16335	Ainnocence	22AIN4-19		TC00821299	C016	0.43	ug/ml	90625	104.22							20220328_SR2OmToxCOM
AB01974605	01	Ainno_16335	Ainnocence	22AIN4-19		TC00821299	C017	0.136	ug/ml	88750	102.06							20220328_SR2OmToxCOM
AB01974605	01	Ainno_16335	Ainnocence	22AIN4-19		TC00821299	C018	0.043	ug/ml	86900	99.93							20220328_SR2OmToxCOM
AB01974605	01	Ainno_16335	Ainnocence	22AIN4-19		TC00821299	C019	0.0136	ug/ml	91825	105.6							20220328_SR2OmToxCOM
AB01974605	01	Ainno_16335	Ainnocence	22AIN4-19		TC00821299	C020	0.0043	ug/ml	88550	101.83							20220328_SR2OmToxCOM
AB01974605	01	Ainno_16335	Ainnocence	22AIN4-19		TC00821299	C021	0.00136	ug/ml	84925	97.65							20220328_SR2OmToxCOM
AB01974605	01	Ainno_16335	Ainnocence	22AIN4-19		TC00821299	C022	0.00043	ug/ml	89500	102.92							20220328_SR2OmToxCOM
AB01974590	01	Ainno_16335	Ainnocence	22AIN4-4		TC00821299	D003	11.33	ug/ml	86675	99.67	>11.33	Inactive	8.94			10	20220328_SR2OmToxCOM
AB01974590	01	Ainno_16335	Ainnocence	22AIN4-4		TC00821299	D004	3.59	ug/ml	88800	102.12							20220328_SR2OmToxCOM
AB01974590	01	Ainno_16335	Ainnocence	22AIN4-4		TC00821299	D005	1.14	ug/ml	88400	101.66							20220328_SR2OmToxCOM
AB01974590	01	Ainno_16335	Ainnocence	22AIN4-4		TC00821299	D006	0.361	ug/ml	86325	99.26							20220328_SR2OmToxCOM
AB01974590	01	Ainno_16335	Ainnocence	22AIN4-4		TC00821299	D007	0.114	ug/ml	91075	104.74							20220328_SR2OmToxCOM
AB01974590	01	Ainno_16335	Ainnocence	22AIN4-4		TC00821299	D008	0.0361	ug/ml	90575	104.16							20220328_SR2OmToxCOM
AB01974590	01	Ainno_16335	Ainnocence	22AIN4-4		TC00821299	D009	0.0114	ug/ml	93250	107.24							20220328_SR2OmToxCOM
AB01974590	01	Ainno_16335	Ainnocence	22AIN4-4		TC00821299	D010	0.00361	ug/ml	91600	105.34							20220328_SR2OmToxCOM
AB01974590	01	Ainno_16335	Ainnocence	22AIN4-4		TC00821299	D011	0.00114	ug/ml	95050	109.32							20220328_SR2OmToxCOM
AB01974590	01	Ainno_16335	Ainnocence	22AIN4-4		TC00821299	D012	0.000361	ug/ml	89800	103.27							20220328_SR2OmToxCOM
AB01974606	01	Ainno_16335	Ainnocence	22AIN4-20		TC00821299	D013	11.33	ug/ml	86550	99.52	>11.33	Inactive	<-1000			10	20220328_SR2OmToxCOM
AB01974606	01	Ainno_16335	Ainnocence	22AIN4-20		TC00821299	D014	3.59	ug/ml	89500	102.92							20220328_SR2OmToxCOM
AB01974606	01	Ainno_16335	Ainnocence	22AIN4-20		TC00821299	D015	1.14	ug/ml	91475	105.2							20220328_SR2OmToxCOM
AB01974606	01	Ainno_16335	Ainnocence	22AIN4-20		TC00821299	D016	0.361	ug/ml	90275	103.82							20220328_SR2OmToxCOM
AB01974606	01	Ainno_16335	Ainnocence	22AIN4-20		TC00821299	D017	0.114	ug/ml	91375	105.08							20220328_SR2OmToxCOM
AB01974606	01	Ainno_16335	Ainnocence	22AIN4-20		TC00821299	D018	0.0361	ug/ml	88925	102.26							20220328_SR2OmToxCOM
AB01974606	01	Ainno_16335	Ainnocence	22AIN4-20		TC00821299	D019	0.0114	ug/ml	87925	101.11							20220328_SR2OmToxCOM
AB01974606	01	Ainno_16335	Ainnocence	22AIN4-20		TC00821299	D020	0.00361	ug/ml	94975	109.23							20220328_SR2OmToxCOM
AB01974606	01	Ainno_16335	Ainnocence	22AIN4-20		TC00821299	D021	0.00114	ug/ml	89625	103.07							20220328_SR2OmToxCOM
AB01974606	01	Ainno_16335	Ainnocence	22AIN4-20		TC00821299	D022	0.000361	ug/ml	85350	98.14							20220328_SR2OmToxCOM
AB01974591	01	Ainno_16335	Ainnocence	22AIN4-5		TC00821299	E003	11.22	ug/ml	91200	104.88	>11.22	Inactive	<-1000			10	20220328_SR2OmToxCOM
AB01974591	01	Ainno_16335	Ainnocence	22AIN4-5		TC00821299	E004	3.55	ug/ml	89650	103.1							20220328_SR2OmToxCOM
AB01974591	01	Ainno_16335	Ainnocence	22AIN4-5		TC00821299	E005	1.12	ug/ml	87325	100.42							20220328_SR2OmToxCOM
AB01974591	01	Ainno_16335	Ainnocence	22AIN4-5		TC00821299	E006	0.354	ug/ml	86250	99.18							20220328_SR2OmToxCOM
AB01974591	01	Ainno_16335	Ainnocence	22AIN4-5		TC00821299	E007	0.112	ug/ml	88875	102.2							20220328_SR2OmToxCOM
AB01974591	01	Ainno_16335	Ainnocence	22AIN4-5		TC00821299	E008	0.0354	ug/ml	91550	105.28							20220328_SR2OmToxCOM
AB01974591	01	Ainno_16335	Ainnocence	22AIN4-5		TC00821299	E009	0.0112	ug/ml	96750	111.27							20220328_SR2OmToxCOM
AB01974591	01	Ainno_16335	Ainnocence	22AIN4-5		TC00821299	E010	0.00354	ug/ml	89425	102.84							20220328_SR2OmToxCOM
AB01974591	01	Ainno_16335	Ainnocence	22AIN4-5		TC00821299	E011	0.00112	ug/ml	88400	101.66							20220328_SR2OmToxCOM
AB01974591	01	Ainno_16335	Ainnocence	22AIN4-5		TC00821299	E012	0.000354	ug/ml	86225	99.15							20220328_SR2OmToxCOM
AB01974592	01	Ainno_16335	Ainnocence	22AIN4-6		TC00821299	F003	11.78	ug/ml	88550	101.83	>11.78	Inactive	-1			10	20220328_SR2OmToxCOM
AB01974592	01	Ainno_16335	Ainnocence	22AIN4-6		TC00821299	F004	3.73	ug/ml	86600	99.58							20220328_SR2OmToxCOM
AB01974592	01	Ainno_16335	Ainnocence	22AIN4-6		TC00821299	F005	1.18	ug/ml	90950	104.59							20220328_SR2OmToxCOM
AB01974592	01	Ainno_16335	Ainnocence	22AIN4-6		TC00821299	F006	0.373	ug/ml	89750	103.21							20220328_SR2OmToxCOM
AB01974592	01	Ainno_16335	Ainnocence	22AIN4-6		TC00821299	F007	0.118	ug/ml	90250	103.79							20220328_SR2OmToxCOM
AB01974592	01	Ainno_16335	Ainnocence	22AIN4-6		TC00821299	F008	0.0373	ug/ml	91475	105.2							20220328_SR2OmToxCOM
AB01974592	01	Ainno_16335	Ainnocence	22AIN4-6		TC00821299	F009	0.0118	ug/ml	80800	92.9							20220328_SR2OmToxCOM
AB01974592	01	Ainno_16335	Ainnocence	22AIN4-6		TC00821299	F010	0.00373	ug/ml	89475	102.89							20220328_SR2OmToxCOM
AB01974592	01	Ainno_16335	Ainnocence	22AIN4-6		TC00821299	F011	0.00118	ug/ml	89225	102.61							20220328_SR2OmToxCOM
AB01974592	01	Ainno_16335	Ainnocence	22AIN4-6		TC00821299	F012	0.000373	ug/ml	91025	104.68							20220328_SR2OmToxCOM
AB01974593	01	Ainno_16335	Ainnocence	22AIN4-7		TC00821299	G003	11.78	ug/ml	83575	96.1	>11.78	Inactive	3.3			10	20220328_SR2OmToxCOM
AB01974593	01	Ainno_16335	Ainnocence	22AIN4-7		TC00821299	G004	3.73	ug/ml	98075	112.8							20220328_SR2OmToxCOM
AB01974593	01	Ainno_16335	Ainnocence	22AIN4-7		TC00821299	G005	1.18	ug/ml	86675	99.67							20220328_SR2OmToxCOM
AB01974593	01	Ainno_16335	Ainnocence	22AIN4-7		TC00821299	G006	0.373	ug/ml	89225	102.61							20220328_SR2OmToxCOM
AB01974593	01	Ainno_16335	Ainnocence	22AIN4-7		TC00821299	G007	0.118	ug/ml	92025	105.83							20220328_SR2OmToxCOM
AB01974593	01	Ainno_16335	Ainnocence	22AIN4-7		TC00821299	G008	0.0373	ug/ml	95275	109.58							20220328_SR2OmToxCOM
AB01974593	01	Ainno_16335	Ainnocence	22AIN4-7		TC00821299	G009	0.0118	ug/ml	102675	118.1							20220328_SR2OmToxCOM
AB01974593	01	Ainno_16335	Ainnocence	22AIN4-7		TC00821299	G010	0.00373	ug/ml	88925	102.26							20220328_SR2OmToxCOM
AB01974593	01	Ainno_16335	Ainnocence	22AIN4-7		TC00821299	G011	0.00118	ug/ml	93950	108.05							20220328_SR2OmToxCOM
AB01974593	01	Ainno_16335	Ainnocence	22AIN4-7		TC00821299	G012	0.000373	ug/ml	90525	104.1							20220328_SR2OmToxCOM
AB01974594	01	Ainno_16335	Ainnocence	22AIN4-8		TC00821299	H003	11.22	ug/ml	87350	100.45	>11.22	Inactive	0.13			10	20220328_SR2OmToxCOM
AB01974594	01	Ainno_16335	Ainnocence	22AIN4-8		TC00821299	H004	3.55	ug/ml	88150	101.37							20220328_SR2OmToxCOM
AB01974594	01	Ainno_16335	Ainnocence	22AIN4-8		TC00821299	H005	1.12	ug/ml	91050	104.71							20220328_SR2OmToxCOM
AB01974594	01	Ainno_16335	Ainnocence	22AIN4-8		TC00821299	H006	0.354	ug/ml	91775	105.54							20220328_SR2OmToxCOM
AB01974594	01	Ainno_16335	Ainnocence	22AIN4-8		TC00821299	H007	0.112	ug/ml	91075	104.74							20220328_SR2OmToxCOM
AB01974594	01	Ainno_16335	Ainnocence	22AIN4-8		TC00821299	H008	0.0354	ug/ml	91100	104.77							20220328_SR2OmToxCOM
AB01974594	01	Ainno_16335	Ainnocence	22AIN4-8		TC00821299	H009	0.0112	ug/ml	94500	108.68							20220328_SR2OmToxCOM
AB01974594	01	Ainno_16335	Ainnocence	22AIN4-8		TC00821299	H010	0.00354	ug/ml	93100	107.07							20220328_SR2OmToxCOM
AB01974594	01	Ainno_16335	Ainnocence	22AIN4-8		TC00821299	H011	0.00112	ug/ml	91850	105.63							20220328_SR2OmToxCOM
AB01974594	01	Ainno_16335	Ainnocence	22AIN4-8		TC00821299	H012	0.000354	ug/ml	93400	107.42							20220328_SR2OmToxCOM
AB01974595	01	Ainno_16335	Ainnocence	22AIN4-9		TC00821299	I003	11.11	ug/ml	90075	103.58	>11.11	Inactive	>9999			10	20220328_SR2OmToxCOM
AB01974595	01	Ainno_16335	Ainnocence	22AIN4-9		TC00821299	I004	3.52	ug/ml	88075	101.28							20220328_SR2OmToxCOM
AB01974595	01	Ainno_16335	Ainnocence	22AIN4-9		TC00821299	I005	1.11	ug/ml	89350	102.75							20220328_SR2OmToxCOM
AB01974595	01	Ainno_16335	Ainnocence	22AIN4-9		TC00821299	I006	0.351	ug/ml	88425	101.68							20220328_SR2OmToxCOM
AB01974595	01	Ainno_16335	Ainnocence	22AIN4-9		TC00821299	I007	0.111	ug/ml	91200	104.88							20220328_SR2OmToxCOM
AB01974595	01	Ainno_16335	Ainnocence	22AIN4-9		TC00821299	I008	0.0351	ug/ml	90700	104.3							20220328_SR2OmToxCOM
AB01974595	01	Ainno_16335	Ainnocence	22AIN4-9		TC00821299	I009	0.0111	ug/ml	87300	100.39							20220328_SR2OmToxCOM
AB01974595	01	Ainno_16335	Ainnocence	22AIN4-9		TC00821299	I010	0.00351	ug/ml	96825	111.36							20220328_SR2OmToxCOM
AB01974595	01	Ainno_16335	Ainnocence	22AIN4-9		TC00821299	I011	0.00111	ug/ml	88175	101.4							20220328_SR2OmToxCOM
AB01974595	01	Ainno_16335	Ainnocence	22AIN4-9		TC00821299	I012	0.000351	ug/ml	88300	101.54							20220328_SR2OmToxCOM
AB01974596	01	Ainno_16335	Ainnocence	22AIN4-10		TC00821299	J003	12.67	ug/ml	88825	102.14	>12.67	Inactive	-26.63			10	20220328_SR2OmToxCOM
AB01974596	01	Ainno_16335	Ainnocence	22AIN4-10		TC00821299	J004	4.01	ug/ml	89825	103.3							20220328_SR2OmToxCOM
AB01974596	01	Ainno_16335	Ainnocence	22AIN4-10		TC00821299	J005	1.27	ug/ml	90375	103.93							20220328_SR2OmToxCOM
AB01974596	01	Ainno_16335	Ainnocence	22AIN4-10		TC00821299	J006	0.402	ug/ml	88425	101.68							20220328_SR2OmToxCOM
AB01974596	01	Ainno_16335	Ainnocence	22AIN4-10		TC00821299	J007	0.127	ug/ml	89100	102.46							20220328_SR2OmToxCOM
AB01974596	01	Ainno_16335	Ainnocence	22AIN4-10		TC00821299	J008	0.0402	ug/ml	86750	99.75							20220328_SR2OmToxCOM
AB01974596	01	Ainno_16335	Ainnocence	22AIN4-10		TC00821299	J009	0.0127	ug/ml	88575	101.86							20220328_SR2OmToxCOM
AB01974596	01	Ainno_16335	Ainnocence	22AIN4-10		TC00821299	J010	0.00402	ug/ml	89125	102.49							20220328_SR2OmToxCOM
AB01974596	01	Ainno_16335	Ainnocence	22AIN4-10		TC00821299	J011	0.00127	ug/ml	90900	104.54							20220328_SR2OmToxCOM
AB01974596	01	Ainno_16335	Ainnocence	22AIN4-10		TC00821299	J012	0.000402	ug/ml	91100	104.77							20220328_SR2OmToxCOM
AB01974597	01	Ainno_16335	Ainnocence	22AIN4-11		TC00821299	K003	11	ug/ml	88750	102.06	>11.00	Inactive	14			10	20220328_SR2OmToxCOM
AB01974597	01	Ainno_16335	Ainnocence	22AIN4-11		TC00821299	K004	3.48	ug/ml	91050	104.71							20220328_SR2OmToxCOM
AB01974597	01	Ainno_16335	Ainnocence	22AIN4-11		TC00821299	K005	1.1	ug/ml	90550	104.13							20220328_SR2OmToxCOM
AB01974597	01	Ainno_16335	Ainnocence	22AIN4-11		TC00821299	K006	0.348	ug/ml	90600	104.19							20220328_SR2OmToxCOM
AB01974597	01	Ainno_16335	Ainnocence	22AIN4-11		TC00821299	K007	0.11	ug/ml	92950	106.9							20220328_SR2OmToxCOM
AB01974597	01	Ainno_16335	Ainnocence	22AIN4-11		TC00821299	K008	0.0348	ug/ml	89800	103.27							20220328_SR2OmToxCOM
AB01974597	01	Ainno_16335	Ainnocence	22AIN4-11		TC00821299	K009	0.011	ug/ml	87500	100.62							20220328_SR2OmToxCOM
AB01974597	01	Ainno_16335	Ainnocence	22AIN4-11		TC00821299	K010	0.00348	ug/ml	87525	100.65							20220328_SR2OmToxCOM
AB01974597	01	Ainno_16335	Ainnocence	22AIN4-11		TC00821299	K011	0.0011	ug/ml	89725	103.18							20220328_SR2OmToxCOM
AB01974597	01	Ainno_16335	Ainnocence	22AIN4-11		TC00821299	K012	0.000348	ug/ml	89500	102.92							20220328_SR2OmToxCOM
AB01974598	01	Ainno_16335	Ainnocence	22AIN4-12		TC00821299	L003	11	ug/ml	90400	103.96	>11.00	Inactive	<-1000			10	20220328_SR2OmToxCOM
AB01974598	01	Ainno_16335	Ainnocence	22AIN4-12		TC00821299	L004	3.48	ug/ml	87550	100.68							20220328_SR2OmToxCOM
AB01974598	01	Ainno_16335	Ainnocence	22AIN4-12		TC00821299	L005	1.1	ug/ml	90600	104.19							20220328_SR2OmToxCOM
AB01974598	01	Ainno_16335	Ainnocence	22AIN4-12		TC00821299	L006	0.348	ug/ml	90550	104.13							20220328_SR2OmToxCOM
AB01974598	01	Ainno_16335	Ainnocence	22AIN4-12		TC00821299	L007	0.11	ug/ml	86725	99.73							20220328_SR2OmToxCOM
AB01974598	01	Ainno_16335	Ainnocence	22AIN4-12		TC00821299	L008	0.0348	ug/ml	88550	101.83							20220328_SR2OmToxCOM
AB01974598	01	Ainno_16335	Ainnocence	22AIN4-12		TC00821299	L009	0.011	ug/ml	88100	101.31							20220328_SR2OmToxCOM
AB01974598	01	Ainno_16335	Ainnocence	22AIN4-12		TC00821299	L010	0.00348	ug/ml	93325	107.33							20220328_SR2OmToxCOM
AB01974598	01	Ainno_16335	Ainnocence	22AIN4-12		TC00821299	L011	0.0011	ug/ml	87550	100.68							20220328_SR2OmToxCOM
AB01974598	01	Ainno_16335	Ainnocence	22AIN4-12		TC00821299	L012	0.000348	ug/ml	89250	102.63							20220328_SR2OmToxCOM
AB01974599	01	Ainno_16335	Ainnocence	22AIN4-13		TC00821299	M003	11.11	ug/ml	88100	101.31	>11.11	Inactive	30.99			10	20220328_SR2OmToxCOM
AB01974599	01	Ainno_16335	Ainnocence	22AIN4-13		TC00821299	M004	3.52	ug/ml	91650	105.4							20220328_SR2OmToxCOM
AB01974599	01	Ainno_16335	Ainnocence	22AIN4-13		TC00821299	M005	1.11	ug/ml	91850	105.63							20220328_SR2OmToxCOM
AB01974599	01	Ainno_16335	Ainnocence	22AIN4-13		TC00821299	M006	0.351	ug/ml	91675	105.43							20220328_SR2OmToxCOM
AB01974599	01	Ainno_16335	Ainnocence	22AIN4-13		TC00821299	M007	0.111	ug/ml	91700	105.46							20220328_SR2OmToxCOM
AB01974599	01	Ainno_16335	Ainnocence	22AIN4-13		TC00821299	M008	0.0351	ug/ml	90850	104.48							20220328_SR2OmToxCOM
AB01974599	01	Ainno_16335	Ainnocence	22AIN4-13		TC00821299	M009	0.0111	ug/ml	93125	107.1							20220328_SR2OmToxCOM
AB01974599	01	Ainno_16335	Ainnocence	22AIN4-13		TC00821299	M010	0.00351	ug/ml	86800	99.81							20220328_SR2OmToxCOM
AB01974599	01	Ainno_16335	Ainnocence	22AIN4-13		TC00821299	M011	0.00111	ug/ml	89375	102.78							20220328_SR2OmToxCOM
AB01974599	01	Ainno_16335	Ainnocence	22AIN4-13		TC00821299	M012	0.000351	ug/ml	87450	100.56							20220328_SR2OmToxCOM
AB01974600	01	Ainno_16335	Ainnocence	22AIN4-14		TC00821299	N003	10.78	ug/ml	98450	113.23	>10.78	Inactive	1.46			10	20220328_SR2OmToxCOM
AB01974600	01	Ainno_16335	Ainnocence	22AIN4-14		TC00821299	N004	3.41	ug/ml	92400	106.26							20220328_SR2OmToxCOM
AB01974600	01	Ainno_16335	Ainnocence	22AIN4-14		TC00821299	N005	1.08	ug/ml	91525	105.26							20220328_SR2OmToxCOM
AB01974600	01	Ainno_16335	Ainnocence	22AIN4-14		TC00821299	N006	0.342	ug/ml	86525	99.5							20220328_SR2OmToxCOM
AB01974600	01	Ainno_16335	Ainnocence	22AIN4-14		TC00821299	N007	0.108	ug/ml	90350	103.9							20220328_SR2OmToxCOM
AB01974600	01	Ainno_16335	Ainnocence	22AIN4-14		TC00821299	N008	0.0342	ug/ml	92250	106.09							20220328_SR2OmToxCOM
AB01974600	01	Ainno_16335	Ainnocence	22AIN4-14		TC00821299	N009	0.0108	ug/ml	91100	104.77							20220328_SR2OmToxCOM
AB01974600	01	Ainno_16335	Ainnocence	22AIN4-14		TC00821299	N010	0.00342	ug/ml	85975	98.86							20220328_SR2OmToxCOM
AB01974600	01	Ainno_16335	Ainnocence	22AIN4-14		TC00821299	N011	0.00108	ug/ml	87725	100.88							20220328_SR2OmToxCOM
AB01974600	01	Ainno_16335	Ainnocence	22AIN4-14		TC00821299	N012	0.000342	ug/ml	92050	105.86							20220328_SR2OmToxCOM
AB01974601	01	Ainno_16335	Ainnocence	22AIN4-15		TC00821299	O003	11.56	ug/ml	87800	100.96	>11.56	Inactive	1.65			10	20220328_SR2OmToxCOM
AB01974601	01	Ainno_16335	Ainnocence	22AIN4-15		TC00821299	O004	3.66	ug/ml	88800	102.12							20220328_SR2OmToxCOM
AB01974601	01	Ainno_16335	Ainnocence	22AIN4-15		TC00821299	O005	1.16	ug/ml	86425	99.38							20220328_SR2OmToxCOM
AB01974601	01	Ainno_16335	Ainnocence	22AIN4-15		TC00821299	O006	0.367	ug/ml	89475	102.89							20220328_SR2OmToxCOM
AB01974601	01	Ainno_16335	Ainnocence	22AIN4-15		TC00821299	O007	0.116	ug/ml	86525	99.5							20220328_SR2OmToxCOM
AB01974601	01	Ainno_16335	Ainnocence	22AIN4-15		TC00821299	O008	0.0367	ug/ml	89700	103.15							20220328_SR2OmToxCOM
AB01974601	01	Ainno_16335	Ainnocence	22AIN4-15		TC00821299	O009	0.0116	ug/ml	90200	103.73							20220328_SR2OmToxCOM
AB01974601	01	Ainno_16335	Ainnocence	22AIN4-15		TC00821299	O010	0.00367	ug/ml	87950	101.14							20220328_SR2OmToxCOM
AB01974601	01	Ainno_16335	Ainnocence	22AIN4-15		TC00821299	O011	0.00116	ug/ml	89625	103.07							20220328_SR2OmToxCOM
AB01974601	01	Ainno_16335	Ainnocence	22AIN4-15		TC00821299	O012	0.000367	ug/ml	96100	110.53							20220328_SR2OmToxCOM
AB01974602	01	Ainno_16335	Ainnocence	22AIN4-16		TC00821299	P003	11.11	ug/ml	84600	97.28	>11.11	Inactive	0.05			10	20220328_SR2OmToxCOM
AB01974602	01	Ainno_16335	Ainnocence	22AIN4-16		TC00821299	P004	3.52	ug/ml	83900	96.47							20220328_SR2OmToxCOM
AB01974602	01	Ainno_16335	Ainnocence	22AIN4-16		TC00821299	P005	1.11	ug/ml	91225	104.91							20220328_SR2OmToxCOM
AB01974602	01	Ainno_16335	Ainnocence	22AIN4-16		TC00821299	P006	0.351	ug/ml	85100	97.85							20220328_SR2OmToxCOM
AB01974602	01	Ainno_16335	Ainnocence	22AIN4-16		TC00821299	P007	0.111	ug/ml	88475	101.74							20220328_SR2OmToxCOM
AB01974602	01	Ainno_16335	Ainnocence	22AIN4-16		TC00821299	P008	0.0351	ug/ml	89550	102.98							20220328_SR2OmToxCOM
AB01974602	01	Ainno_16335	Ainnocence	22AIN4-16		TC00821299	P009	0.0111	ug/ml	90750	104.36							20220328_SR2OmToxCOM
AB01974602	01	Ainno_16335	Ainnocence	22AIN4-16		TC00821299	P010	0.00351	ug/ml	91200	104.88							20220328_SR2OmToxCOM
AB01974602	01	Ainno_16335	Ainnocence	22AIN4-16		TC00821299	P011	0.00111	ug/ml	92075	105.89							20220328_SR2OmToxCOM
AB01974602	01	Ainno_16335	Ainnocence	22AIN4-16		TC00821299	P012	0.000351	ug/ml	92775	106.7							20220328_SR2OmToxCOM

## Sheet: Ctrl Wells
Object ID	Batch	Plate	Well	Lum	% Viability	Testset ID
Cell Control	01	TC00821293	A001	82425	98.92	20220328_SR2OmToxCOM
Cell Control	01	TC00821293	A002	84750	101.72	20220328_SR2OmToxCOM
Cell Control	01	TC00821293	B001	81325	97.6	20220328_SR2OmToxCOM
Cell Control	01	TC00821293	B002	81850	98.23	20220328_SR2OmToxCOM
Cell Control	01	TC00821293	C001	82525	99.04	20220328_SR2OmToxCOM
Cell Control	01	TC00821293	C002	86175	103.43	20220328_SR2OmToxCOM
Cell Control	01	TC00821293	D001	83275	99.94	20220328_SR2OmToxCOM
Cell Control	01	TC00821293	D002	85825	103.01	20220328_SR2OmToxCOM
Cell Control	01	TC00821293	E001	82650	99.19	20220328_SR2OmToxCOM
Cell Control	01	TC00821293	E002	83400	100.09	20220328_SR2OmToxCOM
Cell Control	01	TC00821293	F001	80825	97	20220328_SR2OmToxCOM
Cell Control	01	TC00821293	F002	82425	98.92	20220328_SR2OmToxCOM
Cell Control	01	TC00821293	G001	83300	99.97	20220328_SR2OmToxCOM
Cell Control	01	TC00821293	G002	84775	101.75	20220328_SR2OmToxCOM
Cell Control	01	TC00821293	H001	82325	98.8	20220328_SR2OmToxCOM
Cell Control	01	TC00821293	H002	83800	100.58	20220328_SR2OmToxCOM
Cell Control	01	TC00821293	I001	84350	101.24	20220328_SR2OmToxCOM
Cell Control	01	TC00821293	I002	85025	102.05	20220328_SR2OmToxCOM
Cell Control	01	TC00821293	J001	85200	102.26	20220328_SR2OmToxCOM
Cell Control	01	TC00821293	J002	87525	105.06	20220328_SR2OmToxCOM
Cell Control	01	TC00821293	K001	85600	102.74	20220328_SR2OmToxCOM
Cell Control	01	TC00821293	K002	86025	103.25	20220328_SR2OmToxCOM
Cell Control	01	TC00821293	L001	82175	98.62	20220328_SR2OmToxCOM
Cell Control	01	TC00821293	L002	84850	101.84	20220328_SR2OmToxCOM
Cell Control	01	TC00821293	M001	78225	93.87	20220328_SR2OmToxCOM
Cell Control	01	TC00821293	M002	81800	98.17	20220328_SR2OmToxCOM
Cell Control	01	TC00821293	N001	81250	97.51	20220328_SR2OmToxCOM
Cell Control	01	TC00821293	N002	79700	95.64	20220328_SR2OmToxCOM
Cell Control	01	TC00821293	O001	82250	98.71	20220328_SR2OmToxCOM
Cell Control	01	TC00821293	O002	83300	99.97	20220328_SR2OmToxCOM
Cell Control	01	TC00821293	P001	85325	102.41	20220328_SR2OmToxCOM
Cell Control	01	TC00821293	P002	82050	98.47	20220328_SR2OmToxCOM
Cell Control	01	TC00821296	A001	85025	96.71	20220328_SR2OmToxCOM
Cell Control	01	TC00821296	A002	80950	92.06	20220328_SR2OmToxCOM
Cell Control	01	TC00821296	B001	89950	102.32	20220328_SR2OmToxCOM
Cell Control	01	TC00821296	B002	89950	102.32	20220328_SR2OmToxCOM
Cell Control	01	TC00821296	C001	87750	99.81	20220328_SR2OmToxCOM
Cell Control	01	TC00821296	C002	87450	99.47	20220328_SR2OmToxCOM
Cell Control	01	TC00821296	D001	89500	101.8	20220328_SR2OmToxCOM
Cell Control	01	TC00821296	D002	89800	102.15	20220328_SR2OmToxCOM
Cell Control	01	TC00821296	E001	85425	97.16	20220328_SR2OmToxCOM
Cell Control	01	TC00821296	E002	87625	99.67	20220328_SR2OmToxCOM
Cell Control	01	TC00821296	F001	89050	101.29	20220328_SR2OmToxCOM
Cell Control	01	TC00821296	F002	91175	103.71	20220328_SR2OmToxCOM
Cell Control	01	TC00821296	G001	87275	99.27	20220328_SR2OmToxCOM
Cell Control	01	TC00821296	G002	93325	106.16	20220328_SR2OmToxCOM
Cell Control	01	TC00821296	H001	86125	97.96	20220328_SR2OmToxCOM
Cell Control	01	TC00821296	H002	91825	104.45	20220328_SR2OmToxCOM
Cell Control	01	TC00821296	I001	87475	99.5	20220328_SR2OmToxCOM
Cell Control	01	TC00821296	I002	87325	99.33	20220328_SR2OmToxCOM
Cell Control	01	TC00821296	J001	90450	102.89	20220328_SR2OmToxCOM
Cell Control	01	TC00821296	J002	89725	102.06	20220328_SR2OmToxCOM
Cell Control	01	TC00821296	K001	87300	99.3	20220328_SR2OmToxCOM
Cell Control	01	TC00821296	K002	85300	97.02	20220328_SR2OmToxCOM
Cell Control	01	TC00821296	L001	88500	100.67	20220328_SR2OmToxCOM
Cell Control	01	TC00821296	L002	92775	105.54	20220328_SR2OmToxCOM
Cell Control	01	TC00821296	M001	83675	95.17	20220328_SR2OmToxCOM
Cell Control	01	TC00821296	M002	85625	97.39	20220328_SR2OmToxCOM
Cell Control	01	TC00821296	N001	89975	102.35	20220328_SR2OmToxCOM
Cell Control	01	TC00821296	N002	87300	99.3	20220328_SR2OmToxCOM
Cell Control	01	TC00821296	O001	88900	101.12	20220328_SR2OmToxCOM
Cell Control	01	TC00821296	O002	87350	99.36	20220328_SR2OmToxCOM
Cell Control	01	TC00821296	P001	83600	95.08	20220328_SR2OmToxCOM
Cell Control	01	TC00821296	P002	85825	97.62	20220328_SR2OmToxCOM
Cell Control	01	TC00821299	A001	82825	95.23	20220328_SR2OmToxCOM
Cell Control	01	TC00821299	A002	85125	97.88	20220328_SR2OmToxCOM
Cell Control	01	TC00821299	B001	87200	100.27	20220328_SR2OmToxCOM
Cell Control	01	TC00821299	B002	93075	107.04	20220328_SR2OmToxCOM
Cell Control	01	TC00821299	C001	84925	97.65	20220328_SR2OmToxCOM
Cell Control	01	TC00821299	C002	88200	101.42	20220328_SR2OmToxCOM
Cell Control	01	TC00821299	D001	83000	95.43	20220328_SR2OmToxCOM
Cell Control	01	TC00821299	D002	84575	97.25	20220328_SR2OmToxCOM
Cell Control	01	TC00821299	E001	85675	98.52	20220328_SR2OmToxCOM
Cell Control	01	TC00821299	E002	91275	104.97	20220328_SR2OmToxCOM
Cell Control	01	TC00821299	F001	87300	100.39	20220328_SR2OmToxCOM
Cell Control	01	TC00821299	F002	87000	100.04	20220328_SR2OmToxCOM
Cell Control	01	TC00821299	G001	89500	102.92	20220328_SR2OmToxCOM
Cell Control	01	TC00821299	G002	90275	103.82	20220328_SR2OmToxCOM
Cell Control	01	TC00821299	H001	89075	102.43	20220328_SR2OmToxCOM
Cell Control	01	TC00821299	H002	87175	100.24	20220328_SR2OmToxCOM
Cell Control	01	TC00821299	I001	85100	97.85	20220328_SR2OmToxCOM
Cell Control	01	TC00821299	I002	86125	99.03	20220328_SR2OmToxCOM
Cell Control	01	TC00821299	J001	85875	98.75	20220328_SR2OmToxCOM
Cell Control	01	TC00821299	J002	89550	102.98	20220328_SR2OmToxCOM
Cell Control	01	TC00821299	K001	87700	100.85	20220328_SR2OmToxCOM
Cell Control	01	TC00821299	K002	86375	99.32	20220328_SR2OmToxCOM
Cell Control	01	TC00821299	L001	89550	102.98	20220328_SR2OmToxCOM
Cell Control	01	TC00821299	L002	89425	102.84	20220328_SR2OmToxCOM
Cell Control	01	TC00821299	M001	85975	98.86	20220328_SR2OmToxCOM
Cell Control	01	TC00821299	M002	86600	99.58	20220328_SR2OmToxCOM
Cell Control	01	TC00821299	N001	83625	96.15	20220328_SR2OmToxCOM
Cell Control	01	TC00821299	N002	88750	102.06	20220328_SR2OmToxCOM
Cell Control	01	TC00821299	O001	86200	99.12	20220328_SR2OmToxCOM
Cell Control	01	TC00821299	O002	86050	98.95	20220328_SR2OmToxCOM
Cell Control	01	TC00821299	P001	84575	97.25	20220328_SR2OmToxCOM
Cell Control	01	TC00821299	P002	85150	97.91	20220328_SR2OmToxCOM
PosCtrl	01	TC00821293	A023	125	-0.06	20220328_SR2OmToxCOM
PosCtrl	01	TC00821293	A024	100	-0.09	20220328_SR2OmToxCOM
PosCtrl	01	TC00821293	B023	100	-0.09	20220328_SR2OmToxCOM
PosCtrl	01	TC00821293	B024	100	-0.09	20220328_SR2OmToxCOM
PosCtrl	01	TC00821293	C023	250	0.09	20220328_SR2OmToxCOM
PosCtrl	01	TC00821293	C024	100	-0.09	20220328_SR2OmToxCOM
PosCtrl	01	TC00821293	D023	250	0.09	20220328_SR2OmToxCOM
PosCtrl	01	TC00821293	D024	50	-0.15	20220328_SR2OmToxCOM
PosCtrl	01	TC00821293	E023	1775	1.92	20220328_SR2OmToxCOM
PosCtrl	01	TC00821293	E024	175	0	20220328_SR2OmToxCOM
PosCtrl	01	TC00821293	F023	100	-0.09	20220328_SR2OmToxCOM
PosCtrl	01	TC00821293	F024	75	-0.12	20220328_SR2OmToxCOM
PosCtrl	01	TC00821293	G023	150	-0.03	20220328_SR2OmToxCOM
PosCtrl	01	TC00821293	G024	75	-0.12	20220328_SR2OmToxCOM
PosCtrl	01	TC00821293	H023	150	-0.03	20220328_SR2OmToxCOM
PosCtrl	01	TC00821293	H024	125	-0.06	20220328_SR2OmToxCOM
PosCtrl	01	TC00821293	I023	150	-0.03	20220328_SR2OmToxCOM
PosCtrl	01	TC00821293	I024	50	-0.15	20220328_SR2OmToxCOM
PosCtrl	01	TC00821293	J023	225	0.06	20220328_SR2OmToxCOM
PosCtrl	01	TC00821293	J024	50	-0.15	20220328_SR2OmToxCOM
PosCtrl	01	TC00821293	K023	125	-0.06	20220328_SR2OmToxCOM
PosCtrl	01	TC00821293	K024	125	-0.06	20220328_SR2OmToxCOM
PosCtrl	01	TC00821293	L023	200	0.03	20220328_SR2OmToxCOM
PosCtrl	01	TC00821293	L024	75	-0.12	20220328_SR2OmToxCOM
PosCtrl	01	TC00821293	M023	125	-0.06	20220328_SR2OmToxCOM
PosCtrl	01	TC00821293	M024	75	-0.12	20220328_SR2OmToxCOM
PosCtrl	01	TC00821293	N023	225	0.06	20220328_SR2OmToxCOM
PosCtrl	01	TC00821293	N024	150	-0.03	20220328_SR2OmToxCOM
PosCtrl	01	TC00821293	O023	150	-0.03	20220328_SR2OmToxCOM
PosCtrl	01	TC00821293	O024	100	-0.09	20220328_SR2OmToxCOM
PosCtrl	01	TC00821293	P023	100	-0.09	20220328_SR2OmToxCOM
PosCtrl	01	TC00821293	P024	25	-0.18	20220328_SR2OmToxCOM
PosCtrl	01	TC00821296	A023	175	0.05	20220328_SR2OmToxCOM
PosCtrl	01	TC00821296	A024	50	-0.1	20220328_SR2OmToxCOM
PosCtrl	01	TC00821296	B023	125	-0.01	20220328_SR2OmToxCOM
PosCtrl	01	TC00821296	B024	100	-0.04	20220328_SR2OmToxCOM
PosCtrl	01	TC00821296	C023	75	-0.07	20220328_SR2OmToxCOM
PosCtrl	01	TC00821296	C024	75	-0.07	20220328_SR2OmToxCOM
PosCtrl	01	TC00821296	D023	300	0.19	20220328_SR2OmToxCOM
PosCtrl	01	TC00821296	D024	100	-0.04	20220328_SR2OmToxCOM
PosCtrl	01	TC00821296	E023	175	0.05	20220328_SR2OmToxCOM
PosCtrl	01	TC00821296	E024	200	0.08	20220328_SR2OmToxCOM
PosCtrl	01	TC00821296	F023	200	0.08	20220328_SR2OmToxCOM
PosCtrl	01	TC00821296	F024	125	-0.01	20220328_SR2OmToxCOM
PosCtrl	01	TC00821296	G023	125	-0.01	20220328_SR2OmToxCOM
PosCtrl	01	TC00821296	G024	150	0.02	20220328_SR2OmToxCOM
PosCtrl	01	TC00821296	H023	225	0.1	20220328_SR2OmToxCOM
PosCtrl	01	TC00821296	H024	150	0.02	20220328_SR2OmToxCOM
PosCtrl	01	TC00821296	I023	175	0.05	20220328_SR2OmToxCOM
PosCtrl	01	TC00821296	I024	75	-0.07	20220328_SR2OmToxCOM
PosCtrl	01	TC00821296	J023	100	-0.04	20220328_SR2OmToxCOM
PosCtrl	01	TC00821296	J024	150	0.02	20220328_SR2OmToxCOM
PosCtrl	01	TC00821296	K023	100	-0.04	20220328_SR2OmToxCOM
PosCtrl	01	TC00821296	K024	75	-0.07	20220328_SR2OmToxCOM
PosCtrl	01	TC00821296	L023	150	0.02	20220328_SR2OmToxCOM
PosCtrl	01	TC00821296	L024	100	-0.04	20220328_SR2OmToxCOM
PosCtrl	01	TC00821296	M023	275	0.16	20220328_SR2OmToxCOM
PosCtrl	01	TC00821296	M024	150	0.02	20220328_SR2OmToxCOM
PosCtrl	01	TC00821296	N023	75	-0.07	20220328_SR2OmToxCOM
PosCtrl	01	TC00821296	N024	75	-0.07	20220328_SR2OmToxCOM
PosCtrl	01	TC00821296	O023	100	-0.04	20220328_SR2OmToxCOM
PosCtrl	01	TC00821296	O024	75	-0.07	20220328_SR2OmToxCOM
PosCtrl	01	TC00821296	P023	175	0.05	20220328_SR2OmToxCOM
PosCtrl	01	TC00821296	P024	75	-0.07	20220328_SR2OmToxCOM
PosCtrl	01	TC00821299	A023	150	-0.01	20220328_SR2OmToxCOM
PosCtrl	01	TC00821299	A024	75	-0.1	20220328_SR2OmToxCOM
PosCtrl	01	TC00821299	B023	100	-0.07	20220328_SR2OmToxCOM
PosCtrl	01	TC00821299	B024	75	-0.1	20220328_SR2OmToxCOM
PosCtrl	01	TC00821299	C023	175	0.02	20220328_SR2OmToxCOM
PosCtrl	01	TC00821299	C024	125	-0.04	20220328_SR2OmToxCOM
PosCtrl	01	TC00821299	D023	150	-0.01	20220328_SR2OmToxCOM
PosCtrl	01	TC00821299	D024	125	-0.04	20220328_SR2OmToxCOM
PosCtrl	01	TC00821299	E023	250	0.1	20220328_SR2OmToxCOM
PosCtrl	01	TC00821299	E024	700	0.62	20220328_SR2OmToxCOM
PosCtrl	01	TC00821299	F023	200	0.05	20220328_SR2OmToxCOM
PosCtrl	01	TC00821299	F024	125	-0.04	20220328_SR2OmToxCOM
PosCtrl	01	TC00821299	G023	200	0.05	20220328_SR2OmToxCOM
PosCtrl	01	TC00821299	G024	50	-0.13	20220328_SR2OmToxCOM
PosCtrl	01	TC00821299	H023	150	-0.01	20220328_SR2OmToxCOM
PosCtrl	01	TC00821299	H024	100	-0.07	20220328_SR2OmToxCOM
PosCtrl	01	TC00821299	I023	200	0.05	20220328_SR2OmToxCOM
PosCtrl	01	TC00821299	I024	125	-0.04	20220328_SR2OmToxCOM
PosCtrl	01	TC00821299	J023	200	0.05	20220328_SR2OmToxCOM
PosCtrl	01	TC00821299	J024	125	-0.04	20220328_SR2OmToxCOM
PosCtrl	01	TC00821299	K023	200	0.05	20220328_SR2OmToxCOM
PosCtrl	01	TC00821299	K024	100	-0.07	20220328_SR2OmToxCOM
PosCtrl	01	TC00821299	L023	250	0.1	20220328_SR2OmToxCOM
PosCtrl	01	TC00821299	L024	50	-0.13	20220328_SR2OmToxCOM
PosCtrl	01	TC00821299	M023	225	0.07	20220328_SR2OmToxCOM
PosCtrl	01	TC00821299	M024	100	-0.07	20220328_SR2OmToxCOM
PosCtrl	01	TC00821299	N023	175	0.02	20220328_SR2OmToxCOM
PosCtrl	01	TC00821299	N024	150	-0.01	20220328_SR2OmToxCOM
PosCtrl	01	TC00821299	O023	100	-0.07	20220328_SR2OmToxCOM
PosCtrl	01	TC00821299	O024	75	-0.1	20220328_SR2OmToxCOM
PosCtrl	01	TC00821299	P023	175	0.02	20220328_SR2OmToxCOM
PosCtrl	01	TC00821299	P024	150	-0.01	20220328_SR2OmToxCOM

## Sheet: Batch Ctrl
Plate	Z Analysis	Avg Cell Ctrl	StDev Cell Ctrl	CV Cell Ctrl	Avg Pos Ctrl	StDev Pos Ctrl	CV Pos Ctrl	Testset ID
TC00821293	0.92	83321.9	2037	2.44	176.562	297	168.42	20220328_SR2OmToxCOM
TC00821296	0.9	87915.6	2732	3.11	133.594	61	45.49	20220328_SR2OmToxCOM
TC00821299	0.91	86963.3	2402	2.76	160.938	112	69.8	20220328_SR2OmToxCOM

## Sheet: Notes
	Abase testset ID:	20220328_SR2OmToxCOM
