# Supplementary material for: AI Designed, Mutation Resistant Broad Neutralizing Antibodies Against Multiple SARS-CoV-2 Strains
Source: Research Square preprint supplement (doi:10.21203/rs.3.rs-5184292/v1), 2025-03-27
Supplement: Supplementary file 37 [file S5c_2022-0328_SARS2_Omi_Ainnocence_Comparison_Report.xlsx]

## Sheet: Cmpds DR Comparison
Compound ID	Batch	Library	Supplier	Supplier Id	Main screen, IC50 (ug/mL)	Main screen, IC90 (ug/mL)	Main screen, Graph	Main screen, Activity Status	Main screen, Max % Inhibition	Main screen, Conc @ Max % Inhibition	Main screen, Number Included Points	TOX, CC50 (ug/mL)	TOX, Graph	TOX, Activity Status	TOX, Min % Viability	TOX, Conc @ Min % Viability	TOX, Max % Viability	TOX, Conc @ Max % Viability	TOX, Number Included Points
AB01974161	01	Ainno_16251	Ainnocence	AIN2-1_REGN10933	0.34	0.417		Active	139.59	1	20	>10.00		Inactive	97.05	0.00316	103.06	0.1	10
AB01974177	01	Ainno_16251	Ainnocence	AIN1-31_AINNL0031	5.473	>9.78		Active	80.56	9.78	20	>9.78		Inactive	98.44	0.309	108.45	0.000309	10
AB01974201	01	Ainno_16251	Ainnocence	AIN1-27_AINNL0027	>1.44	>1.44		Inactive	6.66	0.144	20	>1.44		Inactive	95.51	0.144	102.97	0.0144	10
AB01974162	01	Ainno_16251	Ainnocence	AIN2-2_REGN10987	>10.00	>10.00		Inactive	5.44	10	20	>10.00		Inactive	93.15	3.16	101.29	0.0316	10
AB01974175	01	Ainno_16251	Ainnocence	AIN1-29_AINNL0029	>10.00	>10.00		Inactive	4.6	3.16	20	>10.00		Inactive	96.03	0.01	102.68	0.1	10
AB01974172	01	Ainno_16251	Ainnocence	AIN1-22_AINNL0022	>10.22	>10.22		Inactive	4.55	0.0102	20	>10.22		Inactive	96.09	0.102	103.64	0.00323	10
AB01974178	01	Ainno_16251	Ainnocence	AIN1-32_AINNL0032	>10.22	>10.22		Inactive	11.09	1.02	20	>10.22		Inactive	98.44	10.22	106.23	0.0323	10
AB01974179	01	Ainno_16251	Ainnocence	AIN1-33_AINNL0033	>10.67	>10.67		Inactive	3.76	0.339	20	>10.67		Inactive	99.7	0.00339	105.66	0.107	10
AB01974185	01	Ainno_16251	Ainnocence	AIN1-13_AINNL0013	>10.67	>10.67		Inactive	3.64	0.0339	20	>10.67		Inactive	93	0.0107	99.01	10.67	10
AB01974188	01	Ainno_16251	Ainnocence	AIN1-39_AINNL0039	>10.67	>10.67		Inactive	19.31	0.00339	20	>10.67		Inactive	96.55	3.38	103.49	0.000339	10
AB01974186	01	Ainno_16251	Ainnocence	AIN1-15_AINNL0015	>10.78	>10.78		Inactive	4.77	0.108	20	>10.78		Inactive	95.04	0.342	102.95	3.41	10
AB01974189	01	Ainno_16251	Ainnocence	AIN1-40_AINNL0040	>10.78	>10.78		Inactive	4.64	0.00108	20	>10.78		Inactive	94.08	0.00342	101.99	0.108	10
AB01974600	01	Ainno_16335	Ainnocence	22AIN4-14	>10.78	>10.78		Inactive	6.27	0.342	20	>10.78		Inactive	98.86	0.00342	113.23	10.78	10
AB01974173	01	Ainno_16251	Ainnocence	AIN1-26_AINNL0026	>10.89	>10.89		Inactive	4.8	10.89	20	>10.89		Inactive	92.34	0.000345	104.75	0.345	10
AB01974187	01	Ainno_16251	Ainnocence	AIN1-38_AINNL0038	>10.89	>10.89		Inactive	6.85	3.45	20	>10.89		Inactive	91.28	0.345	100.94	3.45	10
AB01974190	01	Ainno_16251	Ainnocence	AIN1-41_AINNL0041	>10.89	>10.89		Inactive	8.8	10.89	20	>10.89		Inactive	96.82	0.000345	104.06	10.89	10
AB01974191	01	Ainno_16251	Ainnocence	AIN1-42_AINNL0042	>10.89	>10.89		Inactive	26.17	10.89	20	>10.89		Inactive	93.75	10.89	102.77	3.45	10
AB01974589	01	Ainno_16335	Ainnocence	22AIN4-3	>10.89	>10.89		Inactive	4.23	10.89	20	>10.89		Inactive	97.42	3.45	108.88	0.0109	10
AB01974171	01	Ainno_16251	Ainnocence	AIN1-21_AINNL0021	>11.00	>11.00		Inactive	9.21	0.348	20	>11.00		Inactive	89.45	1.1	100.94	3.48	10
AB01974181	01	Ainno_16251	Ainnocence	AIN1-1_AINNL0001	>11.00	>11.00		Inactive	14.5	3.48	20	>11.00		Inactive	89.48	1.1	100.03	0.011	10
AB01974210	01	Ainno_16251	Ainnocence	AIN1-48_AINNL0048	>11.00	>11.00		Inactive	9.46	0.0348	20	>11.00		Inactive	96.59	0.348	102.72	0.11	10
AB01974587	01	Ainno_16335	Ainnocence	22AIN4-1	>11.00	>11.00		Inactive	3.75	0.0011	20	>11.00		Inactive	97.97	0.00348	105.77	0.348	10
AB01974597	01	Ainno_16335	Ainnocence	22AIN4-11	>11.00	>11.00		Inactive	7.19	3.48	20	>11.00		Inactive	100.62	0.011	106.9	0.11	10
AB01974598	01	Ainno_16335	Ainnocence	22AIN4-12	>11.00	>11.00		Inactive	4.82	0.348	20	>11.00		Inactive	99.73	0.11	107.33	0.00348	10
AB01974595	01	Ainno_16335	Ainnocence	22AIN4-9	>11.11	>11.11		Inactive	2.92	0.00111	20	>11.11		Inactive	100.39	0.0111	111.36	0.00351	10
AB01974599	01	Ainno_16335	Ainnocence	22AIN4-13	>11.11	>11.11		Inactive	2.27	0.351	20	>11.11		Inactive	99.81	0.00351	107.1	0.0111	10
AB01974602	01	Ainno_16335	Ainnocence	22AIN4-16	>11.11	>11.11		Inactive	7.22	0.0111	20	>11.11		Inactive	96.47	3.52	106.7	0.000351	10
AB01974170	01	Ainno_16251	Ainnocence	AIN1-18_AINNL0018	>11.22	>11.22		Inactive	4.56	0.0354	20	>11.22		Inactive	95.52	0.354	104.6	0.000354	10
AB01974211	01	Ainno_16251	Ainnocence	AIN1-49_AINNL0049	>11.22	>11.22		Inactive	13.07	0.00354	20	>11.22		Inactive	91.5	0.0112	103.54	3.55	10
AB01974212	01	Ainno_16251	Ainnocence	AIN1-50_AINNL0050	>11.22	>11.22		Inactive	2.09	0.0112	20	>11.22		Inactive	94.8	0.00354	102.35	3.55	10
AB01974591	01	Ainno_16335	Ainnocence	22AIN4-5	>11.22	>11.22		Inactive	2.7	11.22	20	>11.22		Inactive	99.15	0.000354	111.27	0.0112	10
AB01974594	01	Ainno_16335	Ainnocence	22AIN4-8	>11.22	>11.22		Inactive	4.33	0.0112	20	>11.22		Inactive	100.45	11.22	108.68	0.0112	10
AB01974590	01	Ainno_16335	Ainnocence	22AIN4-4	>11.33	>11.33		Inactive	4.2	11.33	20	>11.33		Inactive	99.26	0.361	109.32	0.00114	10
AB01974606	01	Ainno_16335	Ainnocence	22AIN4-20	>11.33	>11.33		Inactive	2.33	11.33	20	>11.33		Inactive	98.14	0.000361	109.23	0.00361	10
AB01974206	01	Ainno_16251	Ainnocence	AIN1-44_AINNL0044	>11.44	>11.44		Inactive	4.36	11.44	20	>11.44		Inactive	94.71	0.00115	107.53	3.62	10
AB01974207	01	Ainno_16251	Ainnocence	AIN1-45_AINNL0045	>11.44	>11.44		Inactive	1.96	0.364	20	>11.44		Inactive	97.48	0.000364	105.82	0.00364	10
AB01974213	01	Ainno_16251	Ainnocence	AIN1-16_AINNL0016	>11.44	>11.44		Inactive	4.35	0.00364	20	>11.44		Inactive	93.09	0.00115	103.2	0.115	10
AB01974603	01	Ainno_16335	Ainnocence	22AIN4-17	>11.44	>11.44		Inactive	3.52	0.0364	20	>11.44		Inactive	97.28	0.000364	104.68	0.115	10
AB01974601	01	Ainno_16335	Ainnocence	22AIN4-15	>11.56	>11.56		Inactive	11.49	0.0116	20	>11.56		Inactive	99.38	1.16	110.53	0.000367	10
AB01974604	01	Ainno_16335	Ainnocence	22AIN4-18	>11.56	>11.56		Inactive	5.65	0.00116	20	>11.56		Inactive	100.07	11.56	111.62	3.66	10
AB01974163	01	Ainno_16251	Ainnocence	AIN1-3_AINNL0003	>11.67	>11.67		Inactive	6.58	3.69	20	>11.67		Inactive	96.28	0.037	108.15	0.117	10
AB01974169	01	Ainno_16251	Ainnocence	AIN1-10_AINNL0010	>11.67	>11.67		Inactive	10.76	3.69	20	>11.67		Inactive	91.64	0.037	102.77	3.69	10
AB01974198	01	Ainno_16251	Ainnocence	AIN1-19_AINNL0019	>11.67	>11.67		Inactive	4.58	0.00037	20	>11.67		Inactive	96.11	1.17	105.59	0.00117	10
AB01974164	01	Ainno_16251	Ainnocence	AIN1-5_AINNL0005	>11.78	>11.78		Inactive	3.27	0.00118	20	>11.78		Inactive	94.14	0.00118	104.81	0.00373	10
AB01974165	01	Ainno_16251	Ainnocence	AIN1-6_AINNL0006	>11.78	>11.78		Inactive	4.26	0.0118	20	>11.78		Inactive	94.41	0.0118	100.54	3.73	10
AB01974166	01	Ainno_16251	Ainnocence	AIN1-7_AINNL0007	>11.78	>11.78		Inactive	2.68	0.00118	20	>11.78		Inactive	96.09	3.73	100.91	0.000373	10
AB01974167	01	Ainno_16251	Ainnocence	AIN1-8_AINNL0008	>11.78	>11.78		Inactive	2.62	0.000373	20	>11.78		Inactive	93.87	0.000373	103.43	11.78	10
AB01974194	01	Ainno_16251	Ainnocence	AIN1-17_AINNL0017	>11.78	>11.78		Inactive	7.88	0.373	20	>11.78		Inactive	96.76	0.00118	105.51	0.118	10
AB01974592	01	Ainno_16335	Ainnocence	22AIN4-6	>11.78	>11.78		Inactive	5.28	0.373	20	>11.78		Inactive	92.9	0.0118	105.2	0.0373	10
AB01974593	01	Ainno_16335	Ainnocence	22AIN4-7	>11.78	>11.78		Inactive	10.39	11.78	20	>11.78		Inactive	96.1	11.78	118.1	0.0118	10
AB01974193	01	Ainno_16251	Ainnocence	AIN1-14_AINNL0014	>11.89	>11.89		Inactive	8.21	1.19	20	>11.89		Inactive	95.85	0.0377	103.22	1.19	10
AB01974199	01	Ainno_16251	Ainnocence	AIN1-24_AINNL0024	>12.11	>12.11		Inactive	10.37	0.383	20	>12.11		Inactive	94.71	0.0121	102.55	0.121	10
AB01974588	01	Ainno_16335	Ainnocence	22AIN4-2	>12.11	>12.11		Inactive	2.64	12.11	20	>12.11		Inactive	98.57	0.383	104.54	0.0121	10
AB01974168	01	Ainno_16251	Ainnocence	AIN1-9_AINNL0009	>12.33	>12.33		Inactive	2.61	0.000389	20	>12.33		Inactive	95.31	0.00389	102.47	0.000389	10
AB01974205	01	Ainno_16251	Ainnocence	AIN1-43_AINNL0043	>12.33	>12.33		Inactive	6.63	3.9	20	>12.33		Inactive	95.97	0.00389	104	12.33	10
AB01974596	01	Ainno_16335	Ainnocence	22AIN4-10	>12.67	>12.67		Inactive	7.5	0.127	20	>12.67		Inactive	99.75	0.0402	104.77	0.000402	10
AB01974208	01	Ainno_16251	Ainnocence	AIN1-46_AINNL0046	>13.11	>13.11		Inactive	6.72	13.11	20	>13.11		Inactive	94.8	0.415	107.24	0.0131	10
AB01974605	01	Ainno_16335	Ainnocence	22AIN4-19	>13.56	>13.56		Inactive	4.51	0.00136	20	>13.56		Inactive	97.48	4.29	105.6	0.0136	10
AB01974204	01	Ainno_16251	Ainnocence	AIN1-37_AINNL0037	>2.11	>2.11		Inactive	4.2	0.00211	20	>2.11		Inactive	96.14	2.11	106.76	0.668	10
AB01974203	01	Ainno_16251	Ainnocence	AIN1-35_AINNL0035	>2.33	>2.33		Inactive	3.92	0.737	20	>2.33		Inactive	94.54	0.737	102.86	2.33	10
AB01974202	01	Ainno_16251	Ainnocence	AIN1-34_AINNL0034	>2.56	>2.56		Inactive	6.98	0.00256	20	>2.56		Inactive	98.5	0.256	102.26	8.1e-05	10
AB01974209	01	Ainno_16251	Ainnocence	AIN1-47_AINNL0047	>24.78	>24.78		Inactive	6.32	0.000785	20	>24.78		Inactive	96.82	0.248	104.34	0.00785	10
AB01974197	01	Ainno_16251	Ainnocence	AIN1-23_AINNL0023	>3.44	>3.44		Inactive	2.88	0.0345	20	>3.44		Inactive	94.4	0.000109	104.97	0.0109	10
AB01974183	01	Ainno_16251	Ainnocence	AIN1-2_AINNL0002	>4.78	>4.78		Inactive	3.38	0.00478	20	>4.78		Inactive	91.86	4.78	102.23	0.000151	10
AB01974195	01	Ainno_16251	Ainnocence	AIN1-12_AINNL0012	>41.22	>41.22		Inactive	5.85	0.013	20	>41.22		Inactive	91.44	41.22	101.89	0.0411	10
AB01974196	01	Ainno_16251	Ainnocence	AIN1-20_AINNL0020	>45.22	>45.22		Inactive	6.23	4.53	20	>45.22		Inactive	96.02	0.00143	101.12	45.22	10
AB01974192	01	Ainno_16251	Ainnocence	AIN1-11_AINNL0011	>5.44	>5.44		Inactive	10.06	0.00172	20	>5.44		Inactive	95.91	0.000544	103.94	0.544	10
AB01974184	01	Ainno_16251	Ainnocence	AIN1-4_AINNL0004	>5.67	>5.67		Inactive	9.3	0.566	20	>5.67		Inactive	96.06	0.000566	103.73	0.000179	10
AB01974200	01	Ainno_16251	Ainnocence	AIN1-25_AINNL0025	>7.67	>7.67		Inactive	4.16	0.0769	20	>7.67		Inactive	94.88	0.00769	104.85	7.67	10
AB01974176	01	Ainno_16251	Ainnocence	AIN1-30_AINNL0030	>8.67	>8.67		Inactive	11.3	0.000867	20	>8.67		Inactive	95.88	2.74	105.48	0.00867	10
AB01974180	01	Ainno_16251	Ainnocence	AIN1-36_AINNL0036	>9.44	>9.44		Inactive	3.16	9.44	20	>9.44		Inactive	97	9.44	103.46	0.00299	10
AB01974174	01	Ainno_16251	Ainnocence	AIN1-28_AINNL0028	>9.67	>9.67		Inactive	4.41	0.968	20	>9.67		Inactive	95.52	0.00306	105.84	0.0968	10

## Sheet: Batch Ctrl (MS)
Plate	Z Analysis	Avg Cell Ctrl	StDev Cell Ctrl	CV Cell Ctrl	Avg Virus Ctrl	StDev Virus Ctrl	CV Virus Ctrl	Testset ID
TC00821291	0.81	73305.6	2694	3.68	5507.03	1710	31.05	20220328_SR2_Omi_COM
TC00821292	0.85	85175.8	2380	2.79	6260.16	1558	24.88	20220328_SR2_Omi_COM
TC00821294	0.86	87025	2548	2.93	4880.47	1242	25.44	20220328_SR2_Omi_COM
TC00821295	0.82	86513.3	2166	2.5	7294.53	2598	35.62	20220328_SR2_Omi_COM
TC00821297	0.86	87011.7	2168	2.49	5677.34	1649	29.04	20220328_SR2_Omi_COM
TC00821298	0.81	87758.6	3088	3.52	6928.12	2042	29.48	20220328_SR2_Omi_COM

## Sheet: Batch Ctrl (TOX)
Plate	Z Analysis	Avg Cell Ctrl	StDev Cell Ctrl	CV Cell Ctrl	Avg Pos Ctrl	StDev Pos Ctrl	CV Pos Ctrl	Testset ID
TC00821293	0.92	83321.9	2037	2.44	176.562	297	168.42	20220328_SR2OmToxCOM
TC00821296	0.9	87915.6	2732	3.11	133.594	61	45.49	20220328_SR2OmToxCOM
TC00821299	0.91	86963.3	2402	2.76	160.938	112	69.8	20220328_SR2OmToxCOM

## Sheet: Notes
	Abase testset ID:	20220328_SR2_Omi_COM
		20220328_SR2OmToxCOM
