# Supplementary material for: AI Designed, Mutation Resistant Broad Neutralizing Antibodies Against Multiple SARS-CoV-2 Strains
Source: Research Square preprint supplement (doi:10.21203/rs.3.rs-5184292/v1), 2025-03-27
Supplement: Supplementary file 40 [file S5d_2022-0328_SARS2_Omi_REF_Report.xlsx]

## Sheet: Cmpds DR Graph
Compound ID	Batch	Library	Supplier	Supplier Id	Main screen, IC50 (uM)	Main screen, Graph	Main screen, Activity Status	Main screen, Max % Inhibition	Main screen, Conc @ Max % Inhibition	Main screen, Number Included Points	TOX, CC50 (uM)	TOX, Graph	TOX, Activity Status	TOX, Min % Viability	TOX, Conc @ Min % Viability	TOX, Max % Viability	TOX, Conc @ Max % Viability	TOX, Number Included Points
AB00053436	10	SARS2_REF	SRI Repository	Chloroquine	3.292		Active	102.58	30	10	>30.00		Inactive	89.48	15	98.8	0.117	10
AB01952209	04	SARS2_REF	Selleck	Remdesivir	12.197		Active	115.89	30	10	>30.00		Inactive	92.88	0.059	107.54	0.469	10
AB01955411	01	SARS2_REF	Selleck	E64d (Aloxistatin)	9.177		Active	96.75	30	10	>30.00		Inactive	94.25	7.5	105.28	30	10
AB01968659	01	SARS2_REF	Sigma	CalpainInhibitorIV	0.115		Active	111.86	0.896	10	>7.17		Inactive	93.92	3.59	105.42	0.056	10
AB01973773	01	SARS2_REF	Pfizer	PF-07321332+EI	>1.00		Inactive	-4.2	0.004	10	<0.002		Active	0	0.062	1.68	0.016	10
AB01973774	01	SARS2_REF	Pfizer	PF-07321332	1.457		Active	116.48	5	10	>10.00		Inactive	94.53	2.5	105.21	0.625	10
AB01973775	01	SARS2_REF	Selleck	Molnupiravir	>10.00		Inactive	40.26	10	10	>10.00		Inactive	90.52	0.0046	105.85	3.33	10

## Sheet: Cmpds DR Data (MS)
Compound ID	Batch	Library	Supplier	Supplier ID	Supplier Batch	Plate ID	Well Ref	Assay Conc	Assay Conc Unit	Data Value	% Inhibition	IC50 (uM)	Activity Status	Curve Fit Hill Slope	Curve Fit Norm Chi2	Curve Fit StDev	Number Included Points	Test ID
AB01968659	01	SARS2_REF	Sigma	CalpainInhibitorIV	CalpainInhibitorIV	TC00821300	B003	7.17	uM	79850	105.66	0.115	Active	3.26	9.26	0.01	10	20220328_SR2_Omi_REF
AB01968659	01	SARS2_REF	Sigma	CalpainInhibitorIV	CalpainInhibitorIV	TC00821300	B004	3.59	uM	79075	104.52							20220328_SR2_Omi_REF
AB01968659	01	SARS2_REF	Sigma	CalpainInhibitorIV	CalpainInhibitorIV	TC00821300	B005	1.79	uM	80200	106.17							20220328_SR2_Omi_REF
AB01968659	01	SARS2_REF	Sigma	CalpainInhibitorIV	CalpainInhibitorIV	TC00821300	B006	0.896	uM	84075	111.86							20220328_SR2_Omi_REF
AB01968659	01	SARS2_REF	Sigma	CalpainInhibitorIV	CalpainInhibitorIV	TC00821300	B007	0.448	uM	80525	106.65							20220328_SR2_Omi_REF
AB01968659	01	SARS2_REF	Sigma	CalpainInhibitorIV	CalpainInhibitorIV	TC00821300	B008	0.224	uM	73250	95.98							20220328_SR2_Omi_REF
AB01968659	01	SARS2_REF	Sigma	CalpainInhibitorIV	CalpainInhibitorIV	TC00821300	B009	0.112	uM	36400	41.95							20220328_SR2_Omi_REF
AB01968659	01	SARS2_REF	Sigma	CalpainInhibitorIV	CalpainInhibitorIV	TC00821300	B010	0.056	uM	20250	18.27							20220328_SR2_Omi_REF
AB01968659	01	SARS2_REF	Sigma	CalpainInhibitorIV	CalpainInhibitorIV	TC00821300	B011	0.028	uM	8350	0.82							20220328_SR2_Omi_REF
AB01968659	01	SARS2_REF	Sigma	CalpainInhibitorIV	CalpainInhibitorIV	TC00821300	B012	0.014	uM	18125	15.15							20220328_SR2_Omi_REF
AB00053436	10	SARS2_REF	SRI Repository	Chloroquine	SRI-00015594	TC00821300	C003	30	uM	77750	102.58	3.292	Active	3.28	3.63	0.13	10	20220328_SR2_Omi_REF
AB00053436	10	SARS2_REF	SRI Repository	Chloroquine	SRI-00015594	TC00821300	C004	15	uM	73425	96.24							20220328_SR2_Omi_REF
AB00053436	10	SARS2_REF	SRI Repository	Chloroquine	SRI-00015594	TC00821300	C005	7.5	uM	71800	93.86							20220328_SR2_Omi_REF
AB00053436	10	SARS2_REF	SRI Repository	Chloroquine	SRI-00015594	TC00821300	C006	3.75	uM	49500	61.16							20220328_SR2_Omi_REF
AB00053436	10	SARS2_REF	SRI Repository	Chloroquine	SRI-00015594	TC00821300	C007	1.875	uM	15650	11.52							20220328_SR2_Omi_REF
AB00053436	10	SARS2_REF	SRI Repository	Chloroquine	SRI-00015594	TC00821300	C008	0.938	uM	13350	8.15							20220328_SR2_Omi_REF
AB00053436	10	SARS2_REF	SRI Repository	Chloroquine	SRI-00015594	TC00821300	C009	0.469	uM	8850	1.55							20220328_SR2_Omi_REF
AB00053436	10	SARS2_REF	SRI Repository	Chloroquine	SRI-00015594	TC00821300	C010	0.234	uM	11600	5.58							20220328_SR2_Omi_REF
AB00053436	10	SARS2_REF	SRI Repository	Chloroquine	SRI-00015594	TC00821300	C011	0.117	uM	6400	-2.04							20220328_SR2_Omi_REF
AB00053436	10	SARS2_REF	SRI Repository	Chloroquine	SRI-00015594	TC00821300	C012	0.059	uM	9150	1.99							20220328_SR2_Omi_REF
AB01973774	01	SARS2_REF	Pfizer	PF-07321332	PF-07321332	TC00821300	C013	10	uM	79125	104.6	1.457	Active	8.63	6.61	0.27	10	20220328_SR2_Omi_REF
AB01973774	01	SARS2_REF	Pfizer	PF-07321332	PF-07321332	TC00821300	C014	5	uM	87225	116.48							20220328_SR2_Omi_REF
AB01973774	01	SARS2_REF	Pfizer	PF-07321332	PF-07321332	TC00821300	C015	2.5	uM	75450	99.21							20220328_SR2_Omi_REF
AB01973774	01	SARS2_REF	Pfizer	PF-07321332	PF-07321332	TC00821300	C016	1.25	uM	22125	21.02							20220328_SR2_Omi_REF
AB01973774	01	SARS2_REF	Pfizer	PF-07321332	PF-07321332	TC00821300	C017	0.625	uM	10050	3.31							20220328_SR2_Omi_REF
AB01973774	01	SARS2_REF	Pfizer	PF-07321332	PF-07321332	TC00821300	C018	0.313	uM	4750	-4.46							20220328_SR2_Omi_REF
AB01973774	01	SARS2_REF	Pfizer	PF-07321332	PF-07321332	TC00821300	C019	0.156	uM	4875	-4.28							20220328_SR2_Omi_REF
AB01973774	01	SARS2_REF	Pfizer	PF-07321332	PF-07321332	TC00821300	C020	0.078	uM	8150	0.53							20220328_SR2_Omi_REF
AB01973774	01	SARS2_REF	Pfizer	PF-07321332	PF-07321332	TC00821300	C021	0.039	uM	6325	-2.15							20220328_SR2_Omi_REF
AB01973774	01	SARS2_REF	Pfizer	PF-07321332	PF-07321332	TC00821300	C022	0.0195	uM	6675	-1.64							20220328_SR2_Omi_REF
AB01973773	01	SARS2_REF	Pfizer	PF-07321332+EI	Cmpd+PF-EI6-2uM	TC00821300	D013	1	uM	250	-11.06	>1.00	Inactive	-21.2	11.69	>9999	10	20220328_SR2_Omi_REF
AB01973773	01	SARS2_REF	Pfizer	PF-07321332+EI	Cmpd+PF-EI6-2uM	TC00821300	D014	0.5	uM	500	-10.69							20220328_SR2_Omi_REF
AB01973773	01	SARS2_REF	Pfizer	PF-07321332+EI	Cmpd+PF-EI6-2uM	TC00821300	D015	0.25	uM	275	-11.02							20220328_SR2_Omi_REF
AB01973773	01	SARS2_REF	Pfizer	PF-07321332+EI	Cmpd+PF-EI6-2uM	TC00821300	D016	0.125	uM	350	-10.91							20220328_SR2_Omi_REF
AB01973773	01	SARS2_REF	Pfizer	PF-07321332+EI	Cmpd+PF-EI6-2uM	TC00821300	D017	0.062	uM	675	-10.43							20220328_SR2_Omi_REF
AB01973773	01	SARS2_REF	Pfizer	PF-07321332+EI	Cmpd+PF-EI6-2uM	TC00821300	D018	0.031	uM	100	-11.28							20220328_SR2_Omi_REF
AB01973773	01	SARS2_REF	Pfizer	PF-07321332+EI	Cmpd+PF-EI6-2uM	TC00821300	D019	0.016	uM	275	-11.02							20220328_SR2_Omi_REF
AB01973773	01	SARS2_REF	Pfizer	PF-07321332+EI	Cmpd+PF-EI6-2uM	TC00821300	D020	0.008	uM	575	-10.58							20220328_SR2_Omi_REF
AB01973773	01	SARS2_REF	Pfizer	PF-07321332+EI	Cmpd+PF-EI6-2uM	TC00821300	D021	0.004	uM	4925	-4.2							20220328_SR2_Omi_REF
AB01973773	01	SARS2_REF	Pfizer	PF-07321332+EI	Cmpd+PF-EI6-2uM	TC00821300	D022	0.002	uM	50	-11.35							20220328_SR2_Omi_REF
AB01952209	04	SARS2_REF	Selleck	Remdesivir	Remdesivir	TC00821300	E003	30	uM	86825	115.89	12.197	Active	4.03	7.64	1	10	20220328_SR2_Omi_REF
AB01952209	04	SARS2_REF	Selleck	Remdesivir	Remdesivir	TC00821300	E004	15	uM	52425	65.45							20220328_SR2_Omi_REF
AB01952209	04	SARS2_REF	Selleck	Remdesivir	Remdesivir	TC00821300	E005	7.5	uM	18725	16.03							20220328_SR2_Omi_REF
AB01952209	04	SARS2_REF	Selleck	Remdesivir	Remdesivir	TC00821300	E006	3.75	uM	10700	4.26							20220328_SR2_Omi_REF
AB01952209	04	SARS2_REF	Selleck	Remdesivir	Remdesivir	TC00821300	E007	1.875	uM	12200	6.46							20220328_SR2_Omi_REF
AB01952209	04	SARS2_REF	Selleck	Remdesivir	Remdesivir	TC00821300	E008	0.938	uM	9575	2.62							20220328_SR2_Omi_REF
AB01952209	04	SARS2_REF	Selleck	Remdesivir	Remdesivir	TC00821300	E009	0.469	uM	6175	-2.37							20220328_SR2_Omi_REF
AB01952209	04	SARS2_REF	Selleck	Remdesivir	Remdesivir	TC00821300	E010	0.234	uM	9800	2.95							20220328_SR2_Omi_REF
AB01952209	04	SARS2_REF	Selleck	Remdesivir	Remdesivir	TC00821300	E011	0.117	uM	7525	-0.39							20220328_SR2_Omi_REF
AB01952209	04	SARS2_REF	Selleck	Remdesivir	Remdesivir	TC00821300	E012	0.059	uM	10775	4.37							20220328_SR2_Omi_REF
AB01955411	01	SARS2_REF	Selleck	E64d (Aloxistatin)	E64d (Aloxistatin)	TC00821300	F003	30	uM	73775	96.75	9.177	Active	1.2	11.62	2.05	10	20220328_SR2_Omi_REF
AB01955411	01	SARS2_REF	Selleck	E64d (Aloxistatin)	E64d (Aloxistatin)	TC00821300	F004	15	uM	45325	55.04							20220328_SR2_Omi_REF
AB01955411	01	SARS2_REF	Selleck	E64d (Aloxistatin)	E64d (Aloxistatin)	TC00821300	F005	7.5	uM	27150	28.39							20220328_SR2_Omi_REF
AB01955411	01	SARS2_REF	Selleck	E64d (Aloxistatin)	E64d (Aloxistatin)	TC00821300	F006	3.75	uM	38350	44.81							20220328_SR2_Omi_REF
AB01955411	01	SARS2_REF	Selleck	E64d (Aloxistatin)	E64d (Aloxistatin)	TC00821300	F007	1.875	uM	17575	14.35							20220328_SR2_Omi_REF
AB01955411	01	SARS2_REF	Selleck	E64d (Aloxistatin)	E64d (Aloxistatin)	TC00821300	F008	0.938	uM	7425	-0.54							20220328_SR2_Omi_REF
AB01955411	01	SARS2_REF	Selleck	E64d (Aloxistatin)	E64d (Aloxistatin)	TC00821300	F009	0.469	uM	6850	-1.38							20220328_SR2_Omi_REF
AB01955411	01	SARS2_REF	Selleck	E64d (Aloxistatin)	E64d (Aloxistatin)	TC00821300	F010	0.234	uM	13350	8.15							20220328_SR2_Omi_REF
AB01955411	01	SARS2_REF	Selleck	E64d (Aloxistatin)	E64d (Aloxistatin)	TC00821300	F011	0.117	uM	8900	1.63							20220328_SR2_Omi_REF
AB01955411	01	SARS2_REF	Selleck	E64d (Aloxistatin)	E64d (Aloxistatin)	TC00821300	F012	0.059	uM	8775	1.44							20220328_SR2_Omi_REF
AB01973775	01	SARS2_REF	Selleck	Molnupiravir	S8969	TC00821300	G013	10	uM	35250	40.26	>10.00	Inactive	2.37	3.26	0.94	10	20220328_SR2_Omi_REF
AB01973775	01	SARS2_REF	Selleck	Molnupiravir	S8969	TC00821300	G014	3.33	uM	11050	4.78							20220328_SR2_Omi_REF
AB01973775	01	SARS2_REF	Selleck	Molnupiravir	S8969	TC00821300	G015	1.11	uM	7725	-0.1							20220328_SR2_Omi_REF
AB01973775	01	SARS2_REF	Selleck	Molnupiravir	S8969	TC00821300	G016	0.37	uM	8475	1							20220328_SR2_Omi_REF
AB01973775	01	SARS2_REF	Selleck	Molnupiravir	S8969	TC00821300	G017	0.123	uM	6250	-2.26							20220328_SR2_Omi_REF
AB01973775	01	SARS2_REF	Selleck	Molnupiravir	S8969	TC00821300	G018	0.0412	uM	13125	7.82							20220328_SR2_Omi_REF
AB01973775	01	SARS2_REF	Selleck	Molnupiravir	S8969	TC00821300	G019	0.0137	uM	7500	-0.43							20220328_SR2_Omi_REF
AB01973775	01	SARS2_REF	Selleck	Molnupiravir	S8969	TC00821300	G020	0.0046	uM	5775	-2.96							20220328_SR2_Omi_REF
AB01973775	01	SARS2_REF	Selleck	Molnupiravir	S8969	TC00821300	G021	0.0015	uM	5800	-2.92							20220328_SR2_Omi_REF
AB01973775	01	SARS2_REF	Selleck	Molnupiravir	S8969	TC00821300	G022	0.0005	uM	7400	-0.57							20220328_SR2_Omi_REF

## Sheet: Cmpds DR Data (TOX)
Compound ID	Batch	Library	Supplier	Supplier ID	Supplier Batch	Plate ID	Well Ref	Assay Conc	Assay Conc Unit	Data Value	% Viability	CC50 (uM)	Activity Status	Curve Fit Hill Slope	Curve Fit Norm Chi2	Curve Fit StDev	Number Included Points	Test ID
AB01968659	01	SARS2_REF	Sigma	CalpainInhibitorIV	CalpainInhibitorIV	TC00821301	B003	7.17	uM	68125	97.43	>7.17	Inactive	-0.72			10	20220328_SR2OmToxREF
AB01968659	01	SARS2_REF	Sigma	CalpainInhibitorIV	CalpainInhibitorIV	TC00821301	B004	3.59	uM	65675	93.92							20220328_SR2OmToxREF
AB01968659	01	SARS2_REF	Sigma	CalpainInhibitorIV	CalpainInhibitorIV	TC00821301	B005	1.79	uM	71450	102.2							20220328_SR2OmToxREF
AB01968659	01	SARS2_REF	Sigma	CalpainInhibitorIV	CalpainInhibitorIV	TC00821301	B006	0.896	uM	68200	97.54							20220328_SR2OmToxREF
AB01968659	01	SARS2_REF	Sigma	CalpainInhibitorIV	CalpainInhibitorIV	TC00821301	B007	0.448	uM	67175	96.07							20220328_SR2OmToxREF
AB01968659	01	SARS2_REF	Sigma	CalpainInhibitorIV	CalpainInhibitorIV	TC00821301	B008	0.224	uM	69775	99.8							20220328_SR2OmToxREF
AB01968659	01	SARS2_REF	Sigma	CalpainInhibitorIV	CalpainInhibitorIV	TC00821301	B009	0.112	uM	72650	103.92							20220328_SR2OmToxREF
AB01968659	01	SARS2_REF	Sigma	CalpainInhibitorIV	CalpainInhibitorIV	TC00821301	B010	0.056	uM	73700	105.42							20220328_SR2OmToxREF
AB01968659	01	SARS2_REF	Sigma	CalpainInhibitorIV	CalpainInhibitorIV	TC00821301	B011	0.028	uM	69800	99.83							20220328_SR2OmToxREF
AB01968659	01	SARS2_REF	Sigma	CalpainInhibitorIV	CalpainInhibitorIV	TC00821301	B012	0.014	uM	68925	98.58							20220328_SR2OmToxREF
AB00053436	10	SARS2_REF	SRI Repository	Chloroquine	SRI-00015594	TC00821301	C003	30	uM	68675	98.22	>30.00	Inactive	-0.13			10	20220328_SR2OmToxREF
AB00053436	10	SARS2_REF	SRI Repository	Chloroquine	SRI-00015594	TC00821301	C004	15	uM	62575	89.48							20220328_SR2OmToxREF
AB00053436	10	SARS2_REF	SRI Repository	Chloroquine	SRI-00015594	TC00821301	C005	7.5	uM	64525	92.28							20220328_SR2OmToxREF
AB00053436	10	SARS2_REF	SRI Repository	Chloroquine	SRI-00015594	TC00821301	C006	3.75	uM	64925	92.85							20220328_SR2OmToxREF
AB00053436	10	SARS2_REF	SRI Repository	Chloroquine	SRI-00015594	TC00821301	C007	1.875	uM	65675	93.92							20220328_SR2OmToxREF
AB00053436	10	SARS2_REF	SRI Repository	Chloroquine	SRI-00015594	TC00821301	C008	0.938	uM	68350	97.76							20220328_SR2OmToxREF
AB00053436	10	SARS2_REF	SRI Repository	Chloroquine	SRI-00015594	TC00821301	C009	0.469	uM	67275	96.22							20220328_SR2OmToxREF
AB00053436	10	SARS2_REF	SRI Repository	Chloroquine	SRI-00015594	TC00821301	C010	0.234	uM	65950	94.32							20220328_SR2OmToxREF
AB00053436	10	SARS2_REF	SRI Repository	Chloroquine	SRI-00015594	TC00821301	C011	0.117	uM	69075	98.8							20220328_SR2OmToxREF
AB00053436	10	SARS2_REF	SRI Repository	Chloroquine	SRI-00015594	TC00821301	C012	0.059	uM	68050	97.33							20220328_SR2OmToxREF
AB01973774	01	SARS2_REF	Pfizer	PF-07321332	PF-07321332	TC00821301	C013	10	uM	69650	99.62	>10.00	Inactive	-22.59			10	20220328_SR2OmToxREF
AB01973774	01	SARS2_REF	Pfizer	PF-07321332	PF-07321332	TC00821301	C014	5	uM	68925	98.58							20220328_SR2OmToxREF
AB01973774	01	SARS2_REF	Pfizer	PF-07321332	PF-07321332	TC00821301	C015	2.5	uM	66100	94.53							20220328_SR2OmToxREF
AB01973774	01	SARS2_REF	Pfizer	PF-07321332	PF-07321332	TC00821301	C016	1.25	uM	71000	101.55							20220328_SR2OmToxREF
AB01973774	01	SARS2_REF	Pfizer	PF-07321332	PF-07321332	TC00821301	C017	0.625	uM	73550	105.21							20220328_SR2OmToxREF
AB01973774	01	SARS2_REF	Pfizer	PF-07321332	PF-07321332	TC00821301	C018	0.313	uM	67825	97							20220328_SR2OmToxREF
AB01973774	01	SARS2_REF	Pfizer	PF-07321332	PF-07321332	TC00821301	C019	0.156	uM	67400	96.4							20220328_SR2OmToxREF
AB01973774	01	SARS2_REF	Pfizer	PF-07321332	PF-07321332	TC00821301	C020	0.078	uM	69125	98.87							20220328_SR2OmToxREF
AB01973774	01	SARS2_REF	Pfizer	PF-07321332	PF-07321332	TC00821301	C021	0.039	uM	70025	100.16							20220328_SR2OmToxREF
AB01973774	01	SARS2_REF	Pfizer	PF-07321332	PF-07321332	TC00821301	C022	0.0195	uM	67050	95.89							20220328_SR2OmToxREF
AB01973773	01	SARS2_REF	Pfizer	PF-07321332+EI	Cmpd+PF-EI6-2uM	TC00821301	D013	1	uM	375	0.36	<0.002	Active	-0.68	0.69		10	20220328_SR2OmToxREF
AB01973773	01	SARS2_REF	Pfizer	PF-07321332+EI	Cmpd+PF-EI6-2uM	TC00821301	D014	0.5	uM	275	0.21							20220328_SR2OmToxREF
AB01973773	01	SARS2_REF	Pfizer	PF-07321332+EI	Cmpd+PF-EI6-2uM	TC00821301	D015	0.25	uM	450	0.47							20220328_SR2OmToxREF
AB01973773	01	SARS2_REF	Pfizer	PF-07321332+EI	Cmpd+PF-EI6-2uM	TC00821301	D016	0.125	uM	500	0.54							20220328_SR2OmToxREF
AB01973773	01	SARS2_REF	Pfizer	PF-07321332+EI	Cmpd+PF-EI6-2uM	TC00821301	D017	0.062	uM	125	0							20220328_SR2OmToxREF
AB01973773	01	SARS2_REF	Pfizer	PF-07321332+EI	Cmpd+PF-EI6-2uM	TC00821301	D018	0.031	uM	450	0.47							20220328_SR2OmToxREF
AB01973773	01	SARS2_REF	Pfizer	PF-07321332+EI	Cmpd+PF-EI6-2uM	TC00821301	D019	0.016	uM	1300	1.68							20220328_SR2OmToxREF
AB01973773	01	SARS2_REF	Pfizer	PF-07321332+EI	Cmpd+PF-EI6-2uM	TC00821301	D020	0.008	uM	300	0.25							20220328_SR2OmToxREF
AB01973773	01	SARS2_REF	Pfizer	PF-07321332+EI	Cmpd+PF-EI6-2uM	TC00821301	D021	0.004	uM	250	0.18							20220328_SR2OmToxREF
AB01973773	01	SARS2_REF	Pfizer	PF-07321332+EI	Cmpd+PF-EI6-2uM	TC00821301	D022	0.002	uM	250	0.18							20220328_SR2OmToxREF
AB01952209	04	SARS2_REF	Selleck	Remdesivir	Remdesivir	TC00821301	E003	30	uM	70150	100.34	>30.00	Inactive	11.95			10	20220328_SR2OmToxREF
AB01952209	04	SARS2_REF	Selleck	Remdesivir	Remdesivir	TC00821301	E004	15	uM	69325	99.15							20220328_SR2OmToxREF
AB01952209	04	SARS2_REF	Selleck	Remdesivir	Remdesivir	TC00821301	E005	7.5	uM	68550	98.04							20220328_SR2OmToxREF
AB01952209	04	SARS2_REF	Selleck	Remdesivir	Remdesivir	TC00821301	E006	3.75	uM	71275	101.95							20220328_SR2OmToxREF
AB01952209	04	SARS2_REF	Selleck	Remdesivir	Remdesivir	TC00821301	E007	1.875	uM	72600	103.85							20220328_SR2OmToxREF
AB01952209	04	SARS2_REF	Selleck	Remdesivir	Remdesivir	TC00821301	E008	0.938	uM	73350	104.92							20220328_SR2OmToxREF
AB01952209	04	SARS2_REF	Selleck	Remdesivir	Remdesivir	TC00821301	E009	0.469	uM	75175	107.54							20220328_SR2OmToxREF
AB01952209	04	SARS2_REF	Selleck	Remdesivir	Remdesivir	TC00821301	E010	0.234	uM	69800	99.83							20220328_SR2OmToxREF
AB01952209	04	SARS2_REF	Selleck	Remdesivir	Remdesivir	TC00821301	E011	0.117	uM	72075	103.09							20220328_SR2OmToxREF
AB01952209	04	SARS2_REF	Selleck	Remdesivir	Remdesivir	TC00821301	E012	0.059	uM	64950	92.88							20220328_SR2OmToxREF
AB01955411	01	SARS2_REF	Selleck	E64d (Aloxistatin)	E64d (Aloxistatin)	TC00821301	F003	30	uM	73600	105.28	>30.00	Inactive	0.34			10	20220328_SR2OmToxREF
AB01955411	01	SARS2_REF	Selleck	E64d (Aloxistatin)	E64d (Aloxistatin)	TC00821301	F004	15	uM	69250	99.05							20220328_SR2OmToxREF
AB01955411	01	SARS2_REF	Selleck	E64d (Aloxistatin)	E64d (Aloxistatin)	TC00821301	F005	7.5	uM	65900	94.25							20220328_SR2OmToxREF
AB01955411	01	SARS2_REF	Selleck	E64d (Aloxistatin)	E64d (Aloxistatin)	TC00821301	F006	3.75	uM	68950	98.62							20220328_SR2OmToxREF
AB01955411	01	SARS2_REF	Selleck	E64d (Aloxistatin)	E64d (Aloxistatin)	TC00821301	F007	1.875	uM	71925	102.88							20220328_SR2OmToxREF
AB01955411	01	SARS2_REF	Selleck	E64d (Aloxistatin)	E64d (Aloxistatin)	TC00821301	F008	0.938	uM	71000	101.55							20220328_SR2OmToxREF
AB01955411	01	SARS2_REF	Selleck	E64d (Aloxistatin)	E64d (Aloxistatin)	TC00821301	F009	0.469	uM	66925	95.71							20220328_SR2OmToxREF
AB01955411	01	SARS2_REF	Selleck	E64d (Aloxistatin)	E64d (Aloxistatin)	TC00821301	F010	0.234	uM	70550	100.91							20220328_SR2OmToxREF
AB01955411	01	SARS2_REF	Selleck	E64d (Aloxistatin)	E64d (Aloxistatin)	TC00821301	F011	0.117	uM	67175	96.07							20220328_SR2OmToxREF
AB01955411	01	SARS2_REF	Selleck	E64d (Aloxistatin)	E64d (Aloxistatin)	TC00821301	F012	0.059	uM	70000	100.12							20220328_SR2OmToxREF
AB01973775	01	SARS2_REF	Selleck	Molnupiravir	S8969	TC00821301	G013	10	uM	63800	91.24	>10.00	Inactive	0.15			10	20220328_SR2OmToxREF
AB01973775	01	SARS2_REF	Selleck	Molnupiravir	S8969	TC00821301	G014	3.33	uM	74000	105.85							20220328_SR2OmToxREF
AB01973775	01	SARS2_REF	Selleck	Molnupiravir	S8969	TC00821301	G015	1.11	uM	67200	96.11							20220328_SR2OmToxREF
AB01973775	01	SARS2_REF	Selleck	Molnupiravir	S8969	TC00821301	G016	0.37	uM	69200	98.97							20220328_SR2OmToxREF
AB01973775	01	SARS2_REF	Selleck	Molnupiravir	S8969	TC00821301	G017	0.123	uM	68975	98.65							20220328_SR2OmToxREF
AB01973775	01	SARS2_REF	Selleck	Molnupiravir	S8969	TC00821301	G018	0.0412	uM	73350	104.92							20220328_SR2OmToxREF
AB01973775	01	SARS2_REF	Selleck	Molnupiravir	S8969	TC00821301	G019	0.0137	uM	65700	93.96							20220328_SR2OmToxREF
AB01973775	01	SARS2_REF	Selleck	Molnupiravir	S8969	TC00821301	G020	0.0046	uM	63300	90.52							20220328_SR2OmToxREF
AB01973775	01	SARS2_REF	Selleck	Molnupiravir	S8969	TC00821301	G021	0.0015	uM	63450	90.74							20220328_SR2OmToxREF
AB01973775	01	SARS2_REF	Selleck	Molnupiravir	S8969	TC00821301	G022	0.0005	uM	69950	100.05							20220328_SR2OmToxREF

## Sheet: Ctrl Wells (MS)
Object ID	Batch	Plate	Well	Data value	% Inhibition	Testset ID
Cell Control	01	TC00821300	A001	72125	94.33	20220328_SR2_Omi_REF
Cell Control	01	TC00821300	A002	80175	106.14	20220328_SR2_Omi_REF
Cell Control	01	TC00821300	B001	71000	92.68	20220328_SR2_Omi_REF
Cell Control	01	TC00821300	B002	84950	113.14	20220328_SR2_Omi_REF
Cell Control	01	TC00821300	C001	84325	112.22	20220328_SR2_Omi_REF
Cell Control	01	TC00821300	C002	81825	108.56	20220328_SR2_Omi_REF
Cell Control	01	TC00821300	D001	77825	102.69	20220328_SR2_Omi_REF
Cell Control	01	TC00821300	D002	81325	107.82	20220328_SR2_Omi_REF
Cell Control	01	TC00821300	E001	71275	93.09	20220328_SR2_Omi_REF
Cell Control	01	TC00821300	E002	83250	110.65	20220328_SR2_Omi_REF
Cell Control	01	TC00821300	F001	70475	91.91	20220328_SR2_Omi_REF
Cell Control	01	TC00821300	F002	78750	104.05	20220328_SR2_Omi_REF
Cell Control	01	TC00821300	G001	77775	102.62	20220328_SR2_Omi_REF
Cell Control	01	TC00821300	G002	73700	96.64	20220328_SR2_Omi_REF
Cell Control	01	TC00821300	H001	69475	90.45	20220328_SR2_Omi_REF
Cell Control	01	TC00821300	H002	70625	92.13	20220328_SR2_Omi_REF
Cell Control	01	TC00821300	I001	73175	95.87	20220328_SR2_Omi_REF
Cell Control	01	TC00821300	I002	71700	93.71	20220328_SR2_Omi_REF
Cell Control	01	TC00821300	J001	64325	82.9	20220328_SR2_Omi_REF
Cell Control	01	TC00821300	J002	80775	107.02	20220328_SR2_Omi_REF
Cell Control	01	TC00821300	K001	74500	97.82	20220328_SR2_Omi_REF
Cell Control	01	TC00821300	K002	72725	95.21	20220328_SR2_Omi_REF
Cell Control	01	TC00821300	L001	63725	82.02	20220328_SR2_Omi_REF
Cell Control	01	TC00821300	L002	79900	105.73	20220328_SR2_Omi_REF
Cell Control	01	TC00821300	M001	84075	111.86	20220328_SR2_Omi_REF
Cell Control	01	TC00821300	M002	82525	109.58	20220328_SR2_Omi_REF
Cell Control	01	TC00821300	N001	77200	101.78	20220328_SR2_Omi_REF
Cell Control	01	TC00821300	N002	81175	107.6	20220328_SR2_Omi_REF
Cell Control	01	TC00821300	O001	71000	92.68	20220328_SR2_Omi_REF
Cell Control	01	TC00821300	O002	82550	109.62	20220328_SR2_Omi_REF
Cell Control	01	TC00821300	P001	70050	91.29	20220328_SR2_Omi_REF
Cell Control	01	TC00821300	P002	73375	96.17	20220328_SR2_Omi_REF
Virus Control	01	TC00821300	A023	5825	-2.88	20220328_SR2_Omi_REF
Virus Control	01	TC00821300	A024	8325	0.78	20220328_SR2_Omi_REF
Virus Control	01	TC00821300	B023	4375	-5.01	20220328_SR2_Omi_REF
Virus Control	01	TC00821300	B024	5075	-3.98	20220328_SR2_Omi_REF
Virus Control	01	TC00821300	C023	5100	-3.95	20220328_SR2_Omi_REF
Virus Control	01	TC00821300	C024	6450	-1.97	20220328_SR2_Omi_REF
Virus Control	01	TC00821300	D023	16375	12.59	20220328_SR2_Omi_REF
Virus Control	01	TC00821300	D024	13125	7.82	20220328_SR2_Omi_REF
Virus Control	01	TC00821300	E023	7925	0.2	20220328_SR2_Omi_REF
Virus Control	01	TC00821300	E024	12000	6.17	20220328_SR2_Omi_REF
Virus Control	01	TC00821300	F023	8200	0.6	20220328_SR2_Omi_REF
Virus Control	01	TC00821300	F024	6000	-2.63	20220328_SR2_Omi_REF
Virus Control	01	TC00821300	G023	6175	-2.37	20220328_SR2_Omi_REF
Virus Control	01	TC00821300	G024	7325	-0.68	20220328_SR2_Omi_REF
Virus Control	01	TC00821300	H023	3825	-5.82	20220328_SR2_Omi_REF
Virus Control	01	TC00821300	H024	5375	-3.54	20220328_SR2_Omi_REF
Virus Control	01	TC00821300	I023	5800	-2.92	20220328_SR2_Omi_REF
Virus Control	01	TC00821300	I024	11100	4.85	20220328_SR2_Omi_REF
Virus Control	01	TC00821300	J023	6825	-1.42	20220328_SR2_Omi_REF
Virus Control	01	TC00821300	J024	7925	0.2	20220328_SR2_Omi_REF
Virus Control	01	TC00821300	K023	5775	-2.96	20220328_SR2_Omi_REF
Virus Control	01	TC00821300	K024	8900	1.63	20220328_SR2_Omi_REF
Virus Control	01	TC00821300	L023	8650	1.26	20220328_SR2_Omi_REF
Virus Control	01	TC00821300	L024	7325	-0.68	20220328_SR2_Omi_REF
Virus Control	01	TC00821300	M023	6775	-1.49	20220328_SR2_Omi_REF
Virus Control	01	TC00821300	M024	5350	-3.58	20220328_SR2_Omi_REF
Virus Control	01	TC00821300	N023	11675	5.69	20220328_SR2_Omi_REF
Virus Control	01	TC00821300	N024	8325	0.78	20220328_SR2_Omi_REF
Virus Control	01	TC00821300	O023	7150	-0.94	20220328_SR2_Omi_REF
Virus Control	01	TC00821300	O024	4875	-4.28	20220328_SR2_Omi_REF
Virus Control	01	TC00821300	P023	9625	2.69	20220328_SR2_Omi_REF
Virus Control	01	TC00821300	P024	11775	5.84	20220328_SR2_Omi_REF

## Sheet: Ctrl Wells (TOX)
Object ID	Batch	Plate	Well	Lum	% Viability	Testset ID
Cell Control	01	TC00821301	A001	63125	90.27	20220328_SR2OmToxREF
Cell Control	01	TC00821301	A002	75375	107.82	20220328_SR2OmToxREF
Cell Control	01	TC00821301	B001	69600	99.55	20220328_SR2OmToxREF
Cell Control	01	TC00821301	B002	75925	108.61	20220328_SR2OmToxREF
Cell Control	01	TC00821301	C001	70550	100.91	20220328_SR2OmToxREF
Cell Control	01	TC00821301	C002	73450	105.06	20220328_SR2OmToxREF
Cell Control	01	TC00821301	D001	69700	99.69	20220328_SR2OmToxREF
Cell Control	01	TC00821301	D002	74325	106.32	20220328_SR2OmToxREF
Cell Control	01	TC00821301	E001	76775	109.83	20220328_SR2OmToxREF
Cell Control	01	TC00821301	E002	75100	107.43	20220328_SR2OmToxREF
Cell Control	01	TC00821301	F001	71250	101.91	20220328_SR2OmToxREF
Cell Control	01	TC00821301	F002	68025	97.29	20220328_SR2OmToxREF
Cell Control	01	TC00821301	G001	67250	96.18	20220328_SR2OmToxREF
Cell Control	01	TC00821301	G002	71825	102.74	20220328_SR2OmToxREF
Cell Control	01	TC00821301	H001	60175	86.04	20220328_SR2OmToxREF
Cell Control	01	TC00821301	H002	69625	99.58	20220328_SR2OmToxREF
Cell Control	01	TC00821301	I001	72975	104.38	20220328_SR2OmToxREF
Cell Control	01	TC00821301	I002	70325	100.59	20220328_SR2OmToxREF
Cell Control	01	TC00821301	J001	58825	84.11	20220328_SR2OmToxREF
Cell Control	01	TC00821301	J002	75075	107.39	20220328_SR2OmToxREF
Cell Control	01	TC00821301	K001	71700	102.56	20220328_SR2OmToxREF
Cell Control	01	TC00821301	K002	72525	103.74	20220328_SR2OmToxREF
Cell Control	01	TC00821301	L001	59950	85.72	20220328_SR2OmToxREF
Cell Control	01	TC00821301	L002	70175	100.37	20220328_SR2OmToxREF
Cell Control	01	TC00821301	M001	72050	103.06	20220328_SR2OmToxREF
Cell Control	01	TC00821301	M002	72375	103.52	20220328_SR2OmToxREF
Cell Control	01	TC00821301	N001	71800	102.7	20220328_SR2OmToxREF
Cell Control	01	TC00821301	N002	68225	97.58	20220328_SR2OmToxREF
Cell Control	01	TC00821301	O001	67050	95.89	20220328_SR2OmToxREF
Cell Control	01	TC00821301	O002	62225	88.98	20220328_SR2OmToxREF
Cell Control	01	TC00821301	P001	72275	103.38	20220328_SR2OmToxREF
Cell Control	01	TC00821301	P002	67675	96.79	20220328_SR2OmToxREF
PosCtrl	01	TC00821301	A023	125	0	20220328_SR2OmToxREF
PosCtrl	01	TC00821301	A024	100	-0.04	20220328_SR2OmToxREF
PosCtrl	01	TC00821301	B023	125	0	20220328_SR2OmToxREF
PosCtrl	01	TC00821301	B024	75	-0.07	20220328_SR2OmToxREF
PosCtrl	01	TC00821301	C023	125	0	20220328_SR2OmToxREF
PosCtrl	01	TC00821301	C024	125	0	20220328_SR2OmToxREF
PosCtrl	01	TC00821301	D023	125	0	20220328_SR2OmToxREF
PosCtrl	01	TC00821301	D024	50	-0.11	20220328_SR2OmToxREF
PosCtrl	01	TC00821301	E023	175	0.07	20220328_SR2OmToxREF
PosCtrl	01	TC00821301	E024	100	-0.04	20220328_SR2OmToxREF
PosCtrl	01	TC00821301	F023	175	0.07	20220328_SR2OmToxREF
PosCtrl	01	TC00821301	F024	75	-0.07	20220328_SR2OmToxREF
PosCtrl	01	TC00821301	G023	125	0	20220328_SR2OmToxREF
PosCtrl	01	TC00821301	G024	75	-0.07	20220328_SR2OmToxREF
PosCtrl	01	TC00821301	H023	175	0.07	20220328_SR2OmToxREF
PosCtrl	01	TC00821301	H024	75	-0.07	20220328_SR2OmToxREF
PosCtrl	01	TC00821301	I023	175	0.07	20220328_SR2OmToxREF
PosCtrl	01	TC00821301	I024	125	0	20220328_SR2OmToxREF
PosCtrl	01	TC00821301	J023	175	0.07	20220328_SR2OmToxREF
PosCtrl	01	TC00821301	J024	100	-0.04	20220328_SR2OmToxREF
PosCtrl	01	TC00821301	K023	150	0.04	20220328_SR2OmToxREF
PosCtrl	01	TC00821301	K024	75	-0.07	20220328_SR2OmToxREF
PosCtrl	01	TC00821301	L023	275	0.21	20220328_SR2OmToxREF
PosCtrl	01	TC00821301	L024	75	-0.07	20220328_SR2OmToxREF
PosCtrl	01	TC00821301	M023	100	-0.04	20220328_SR2OmToxREF
PosCtrl	01	TC00821301	M024	100	-0.04	20220328_SR2OmToxREF
PosCtrl	01	TC00821301	N023	150	0.04	20220328_SR2OmToxREF
PosCtrl	01	TC00821301	N024	125	0	20220328_SR2OmToxREF
PosCtrl	01	TC00821301	O023	200	0.11	20220328_SR2OmToxREF
PosCtrl	01	TC00821301	O024	100	-0.04	20220328_SR2OmToxREF
PosCtrl	01	TC00821301	P023	125	0	20220328_SR2OmToxREF
PosCtrl	01	TC00821301	P024	125	0	20220328_SR2OmToxREF

## Sheet: Batch Ctrl (MS)
Plate	Z Analysis	Avg Cell Ctrl	StDev Cell Ctrl	CV Cell Ctrl	Avg Virus Ctrl	StDev Virus Ctrl	CV Virus Ctrl	Testset ID
TC00821300	0.62	75989.1	5891	7.75	7791.41	2854	36.63	20220328_SR2_Omi_REF

## Sheet: Batch Ctrl (TOX)
Plate	Z Analysis	Avg Cell Ctrl	StDev Cell Ctrl	CV Cell Ctrl	Avg Pos Ctrl	StDev Pos Ctrl	CV Pos Ctrl	Testset ID
TC00821301	0.79	69915.6	4728	6.76	125	46	36.98	20220328_SR2OmToxREF

## Sheet: Notes
	Abase testset ID:	20220328_SR2_Omi_REF
		20220328_SR2OmToxREF
