# Supplementary material for: AI Designed, Mutation Resistant Broad Neutralizing Antibodies Against Multiple SARS-CoV-2 Strains
Source: Research Square preprint supplement (doi:10.21203/rs.3.rs-5184292/v1), 2025-03-27
Supplement: Supplementary file 43 [file SupportingTables Titles.docx]

Table S1: ELISA OD450 data for the first round of 50 Batch 1 antibodies along with reference controls. Binding to B.1, Delta, and Omicron were tested in this assay for this batch of antibodies.

Table S2: ELISA OD450 data for the second round of 20 Batch 2 antibodies along with reference controls. Binding to B.1, Delta, and Omicron were tested in this assay for this batch of antibodies.

Table S3: The original data for the IC50 dose response curve for both round 1 and round 2 batches of antibodies calculated from the ELISA assay data for binding to B.1, Delta, and Omicron

Table S4: Coronavirus cytopathic assay data report for the first round of 50 Batch 1 antibodies against Delta. This data is split into four sections:

1. Anti-viral assay compound dose-responsiveness data and activity status.
2. Cytotoxicity assay data and activity status.
3. Anti-viral assay and cytotoxicity assay results compared together.
4. Overall data report containing all of the data sections from above.

Table S5: Coronavirus cytopathic assay data report for the first round and second round antibodies for a total of 70 against Omicron. This data is split into four sections:

1. Anti-viral assay compound dose-responsiveness data and activity status.
2. Cytotoxicity assay data and activity status.
3. Anti-viral assay and cytotoxicity assay results compared together.
4. Overall data report containing all of the data sections from above.
